# Supplementary material for: Towards a DNA Barcode Reference Database for Spiders and Harvestmen of Germany
Source: PubMed Central journal article supplement (PMC5040438; doi:10.1371/journal.pone.0162624), 2016-09-28
Supplement: pone.0162624.s002.pdf [file pone.0162624.s002.pdf]

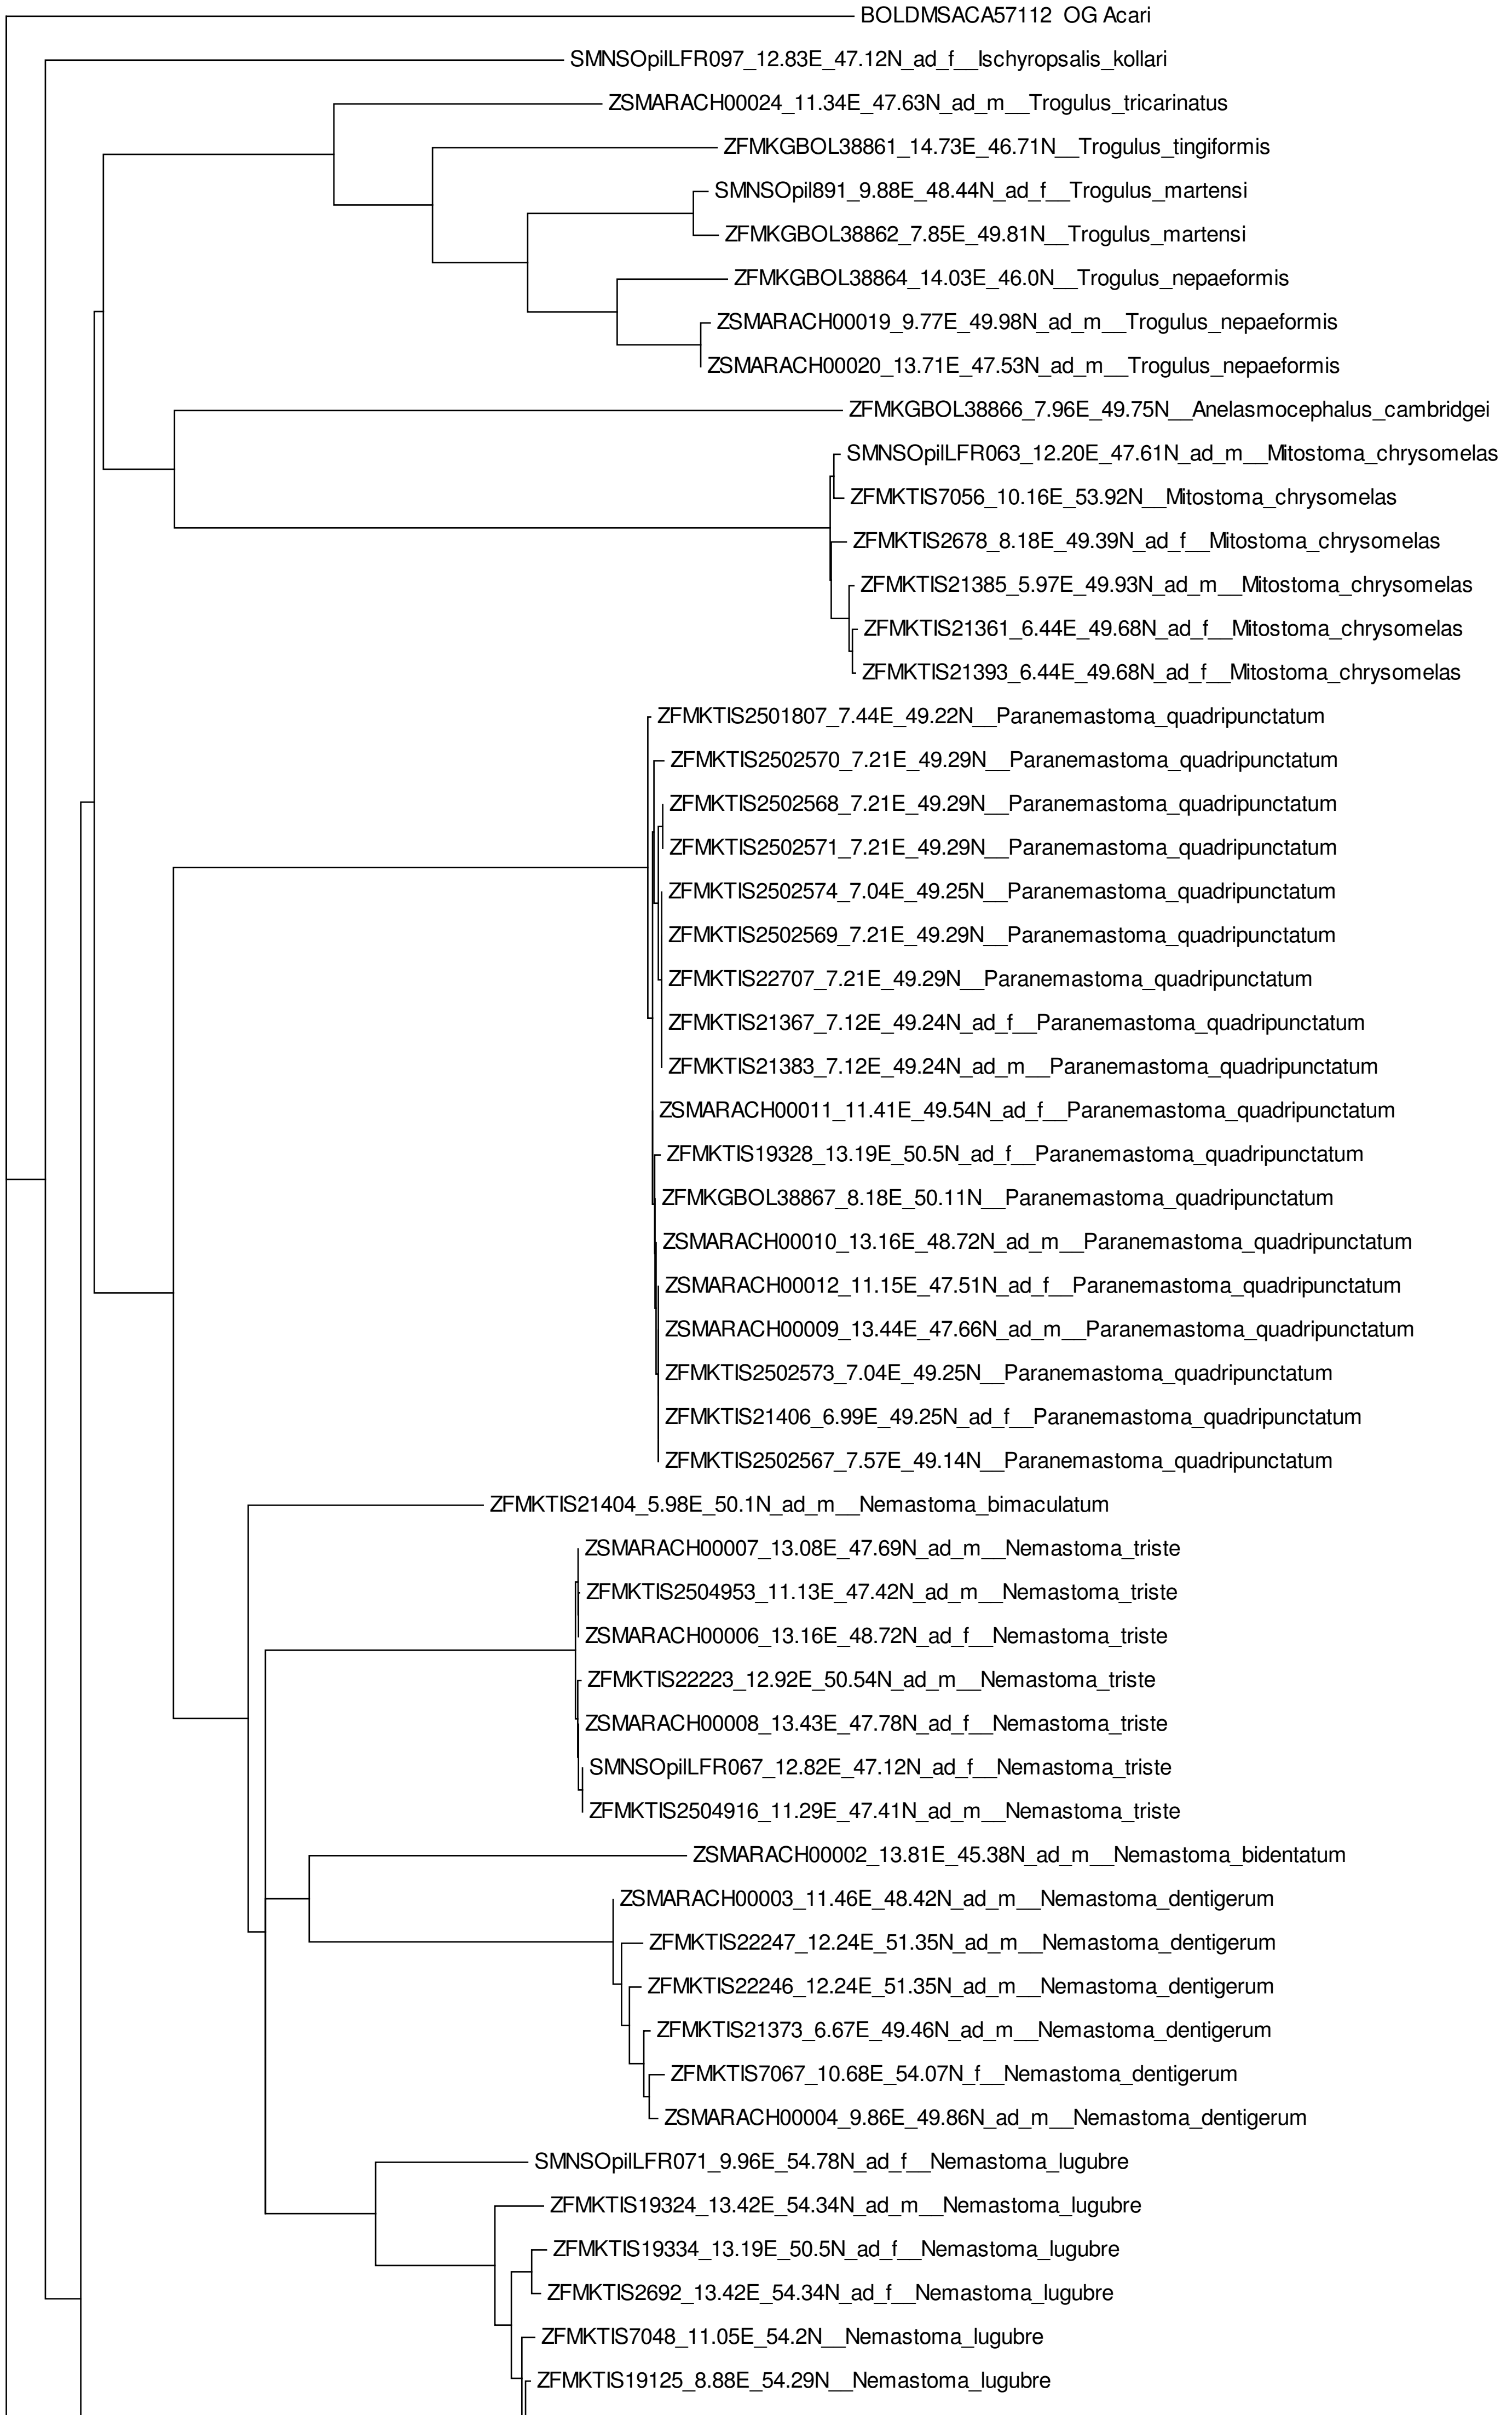

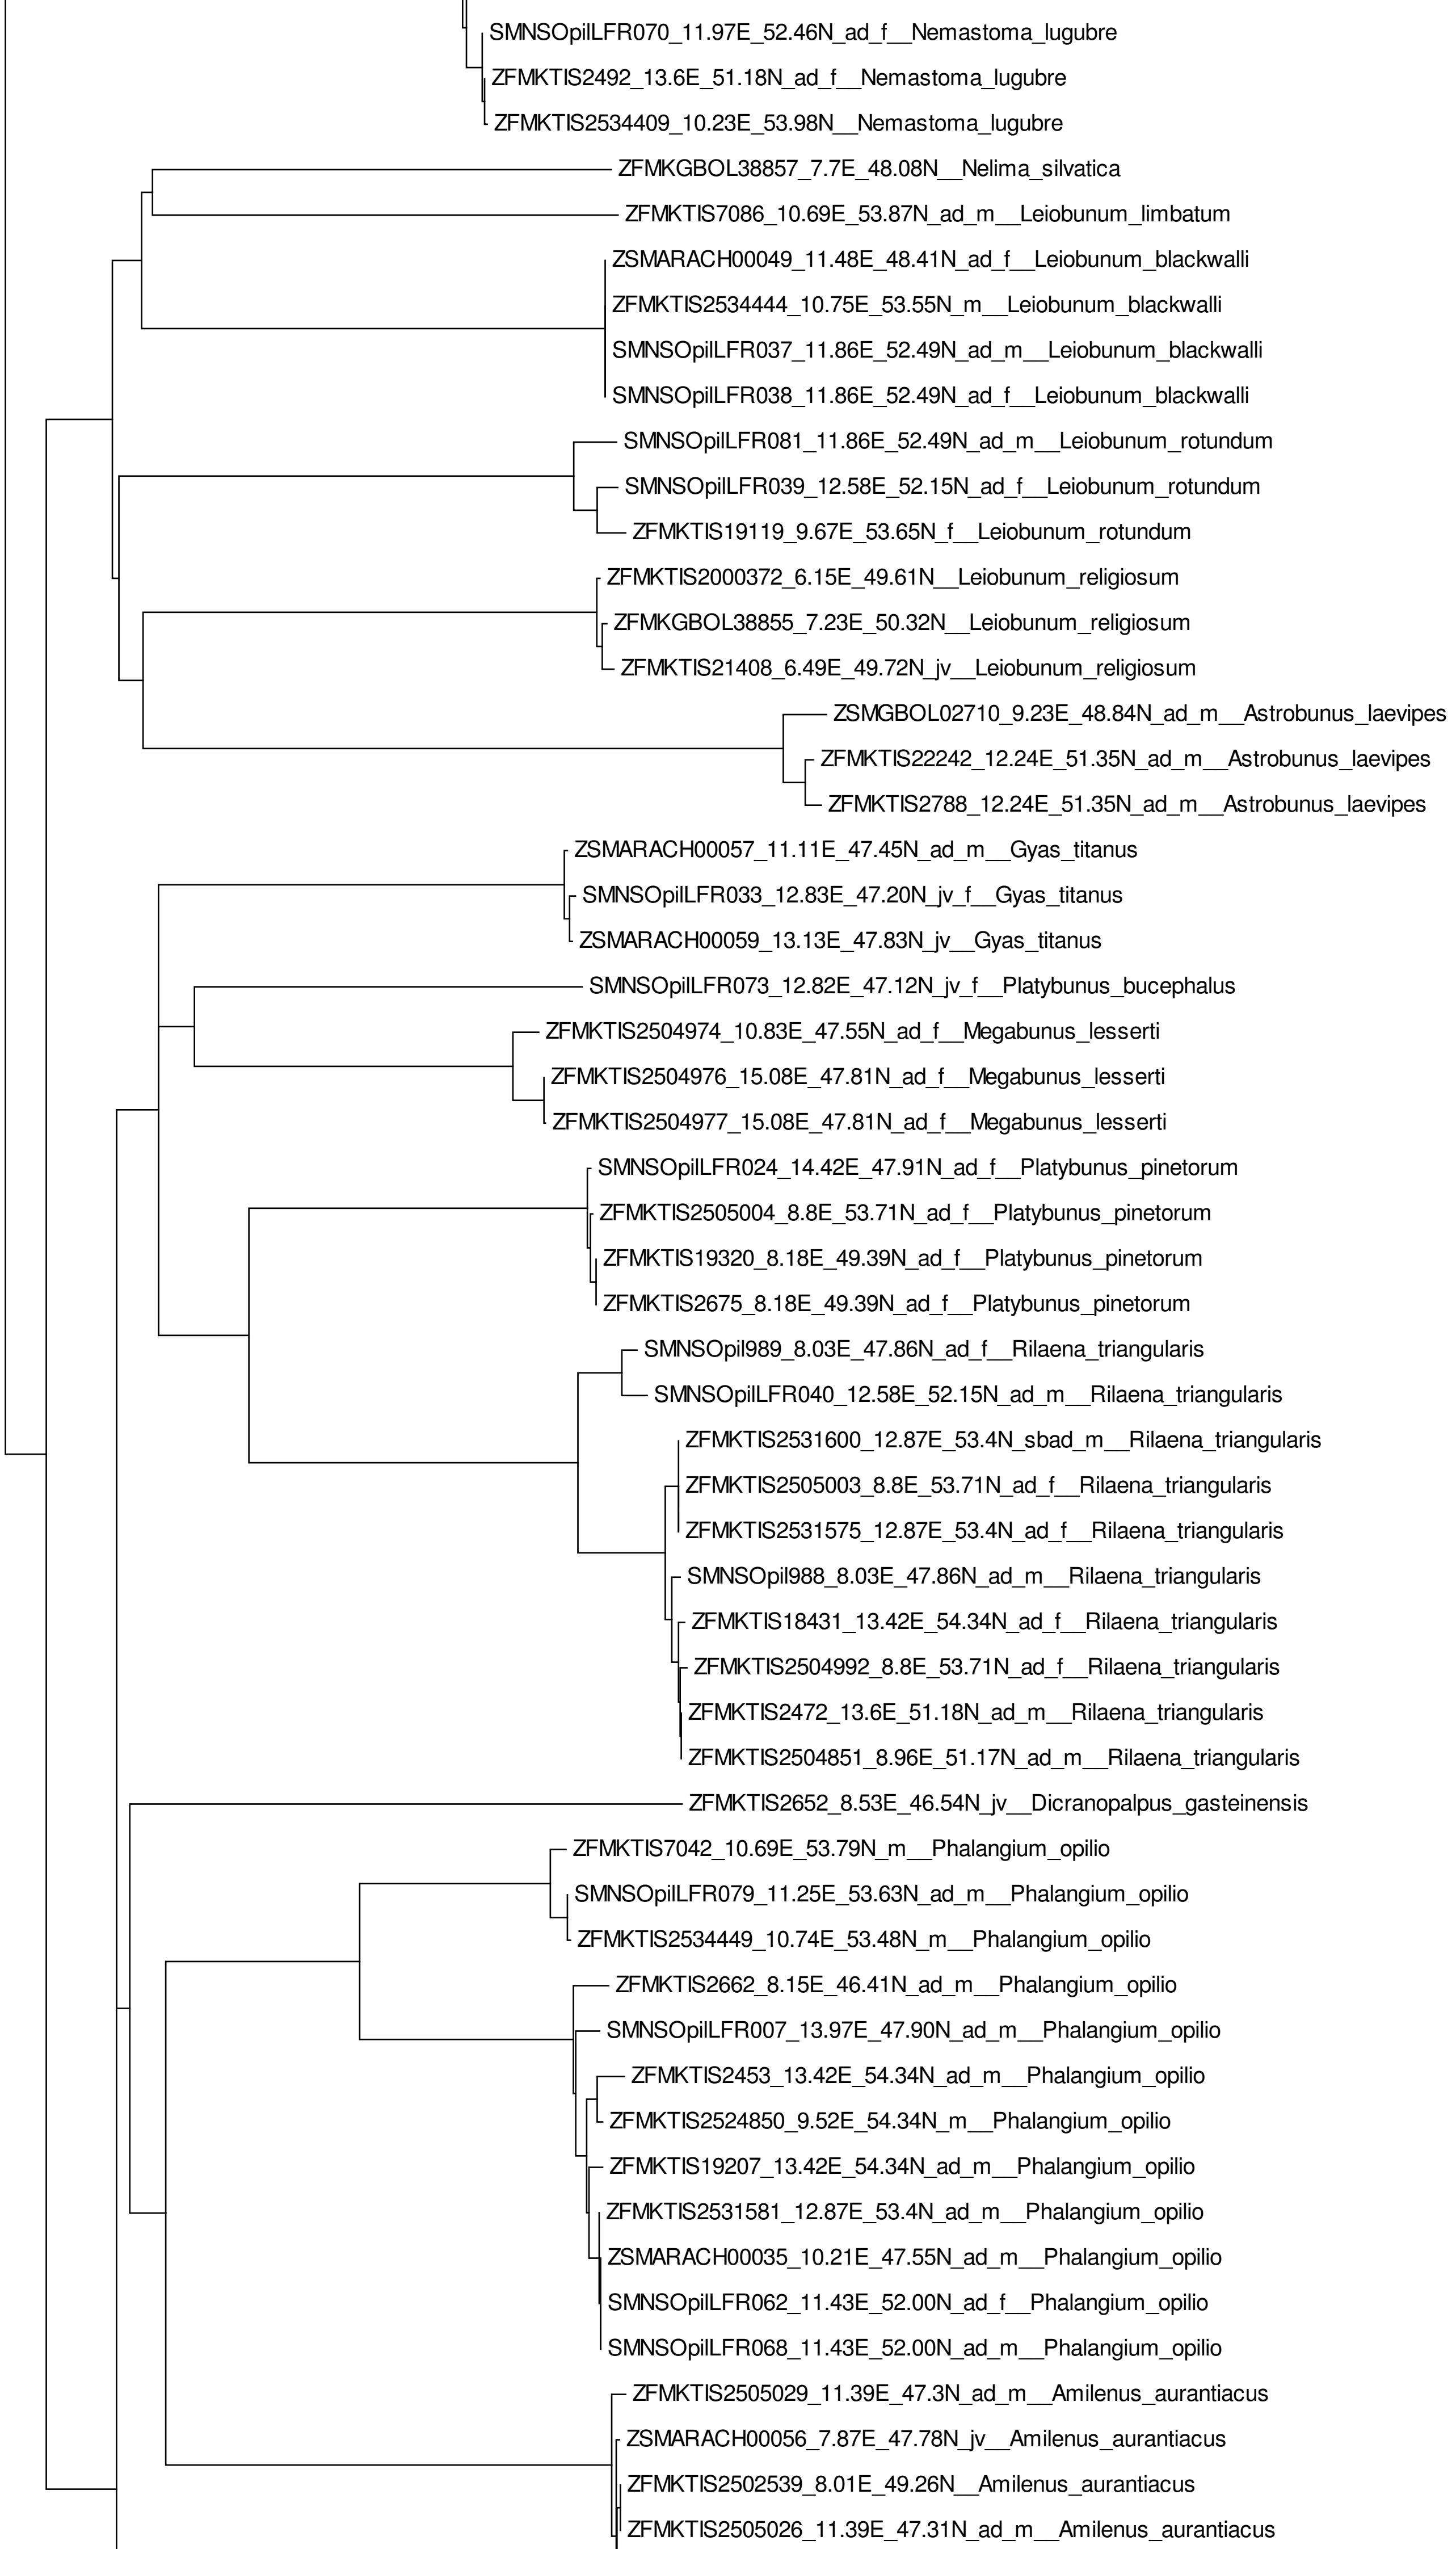



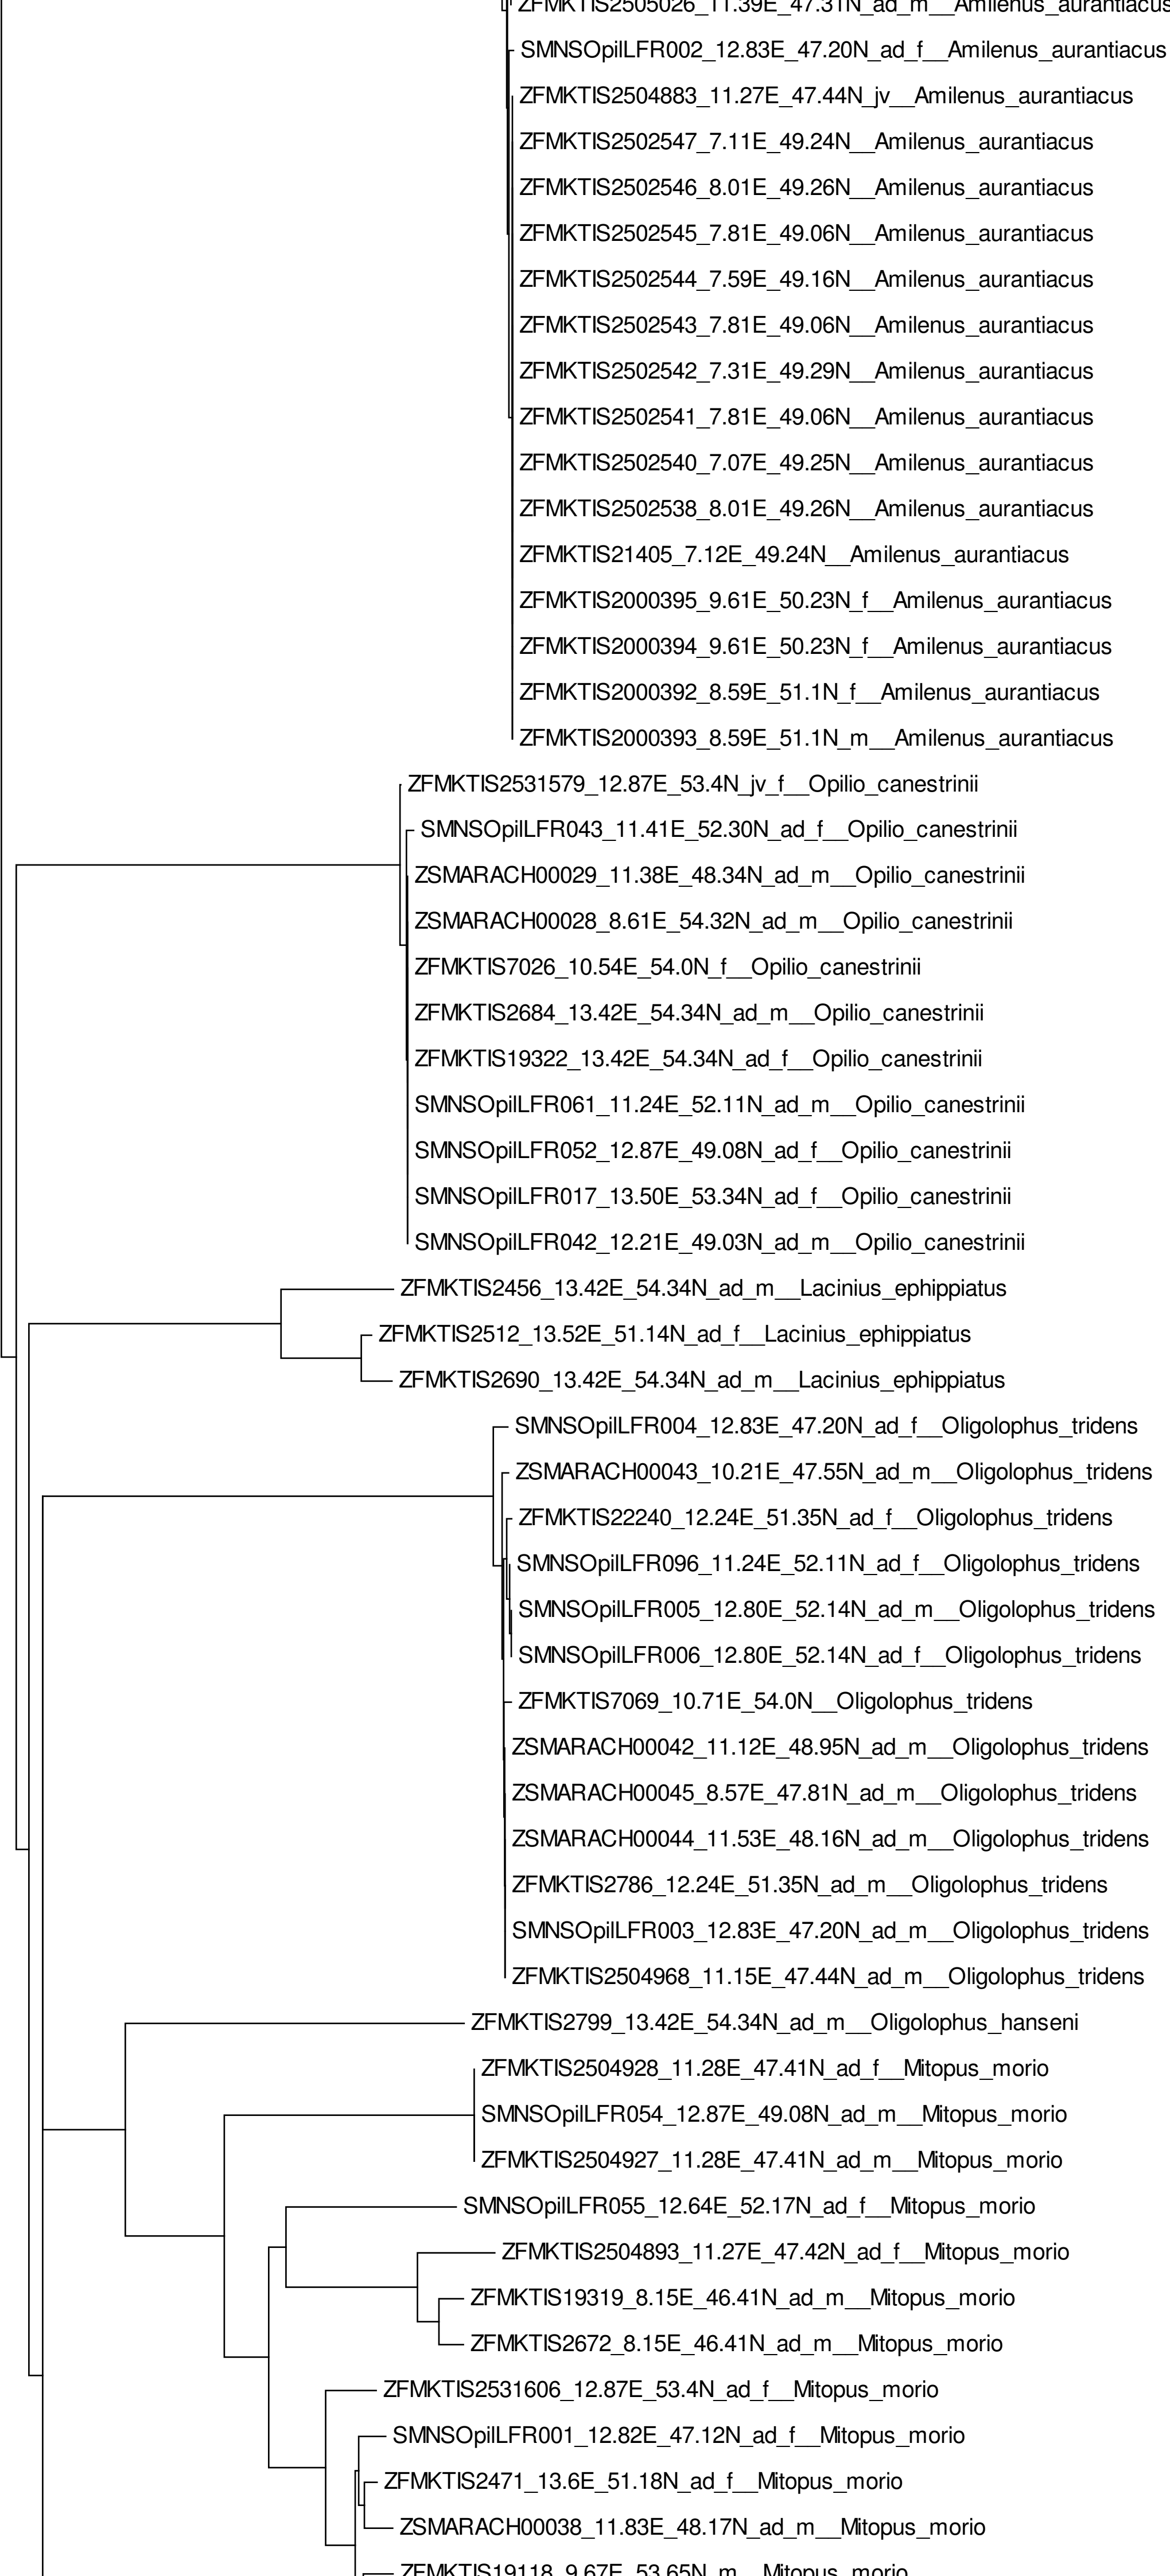

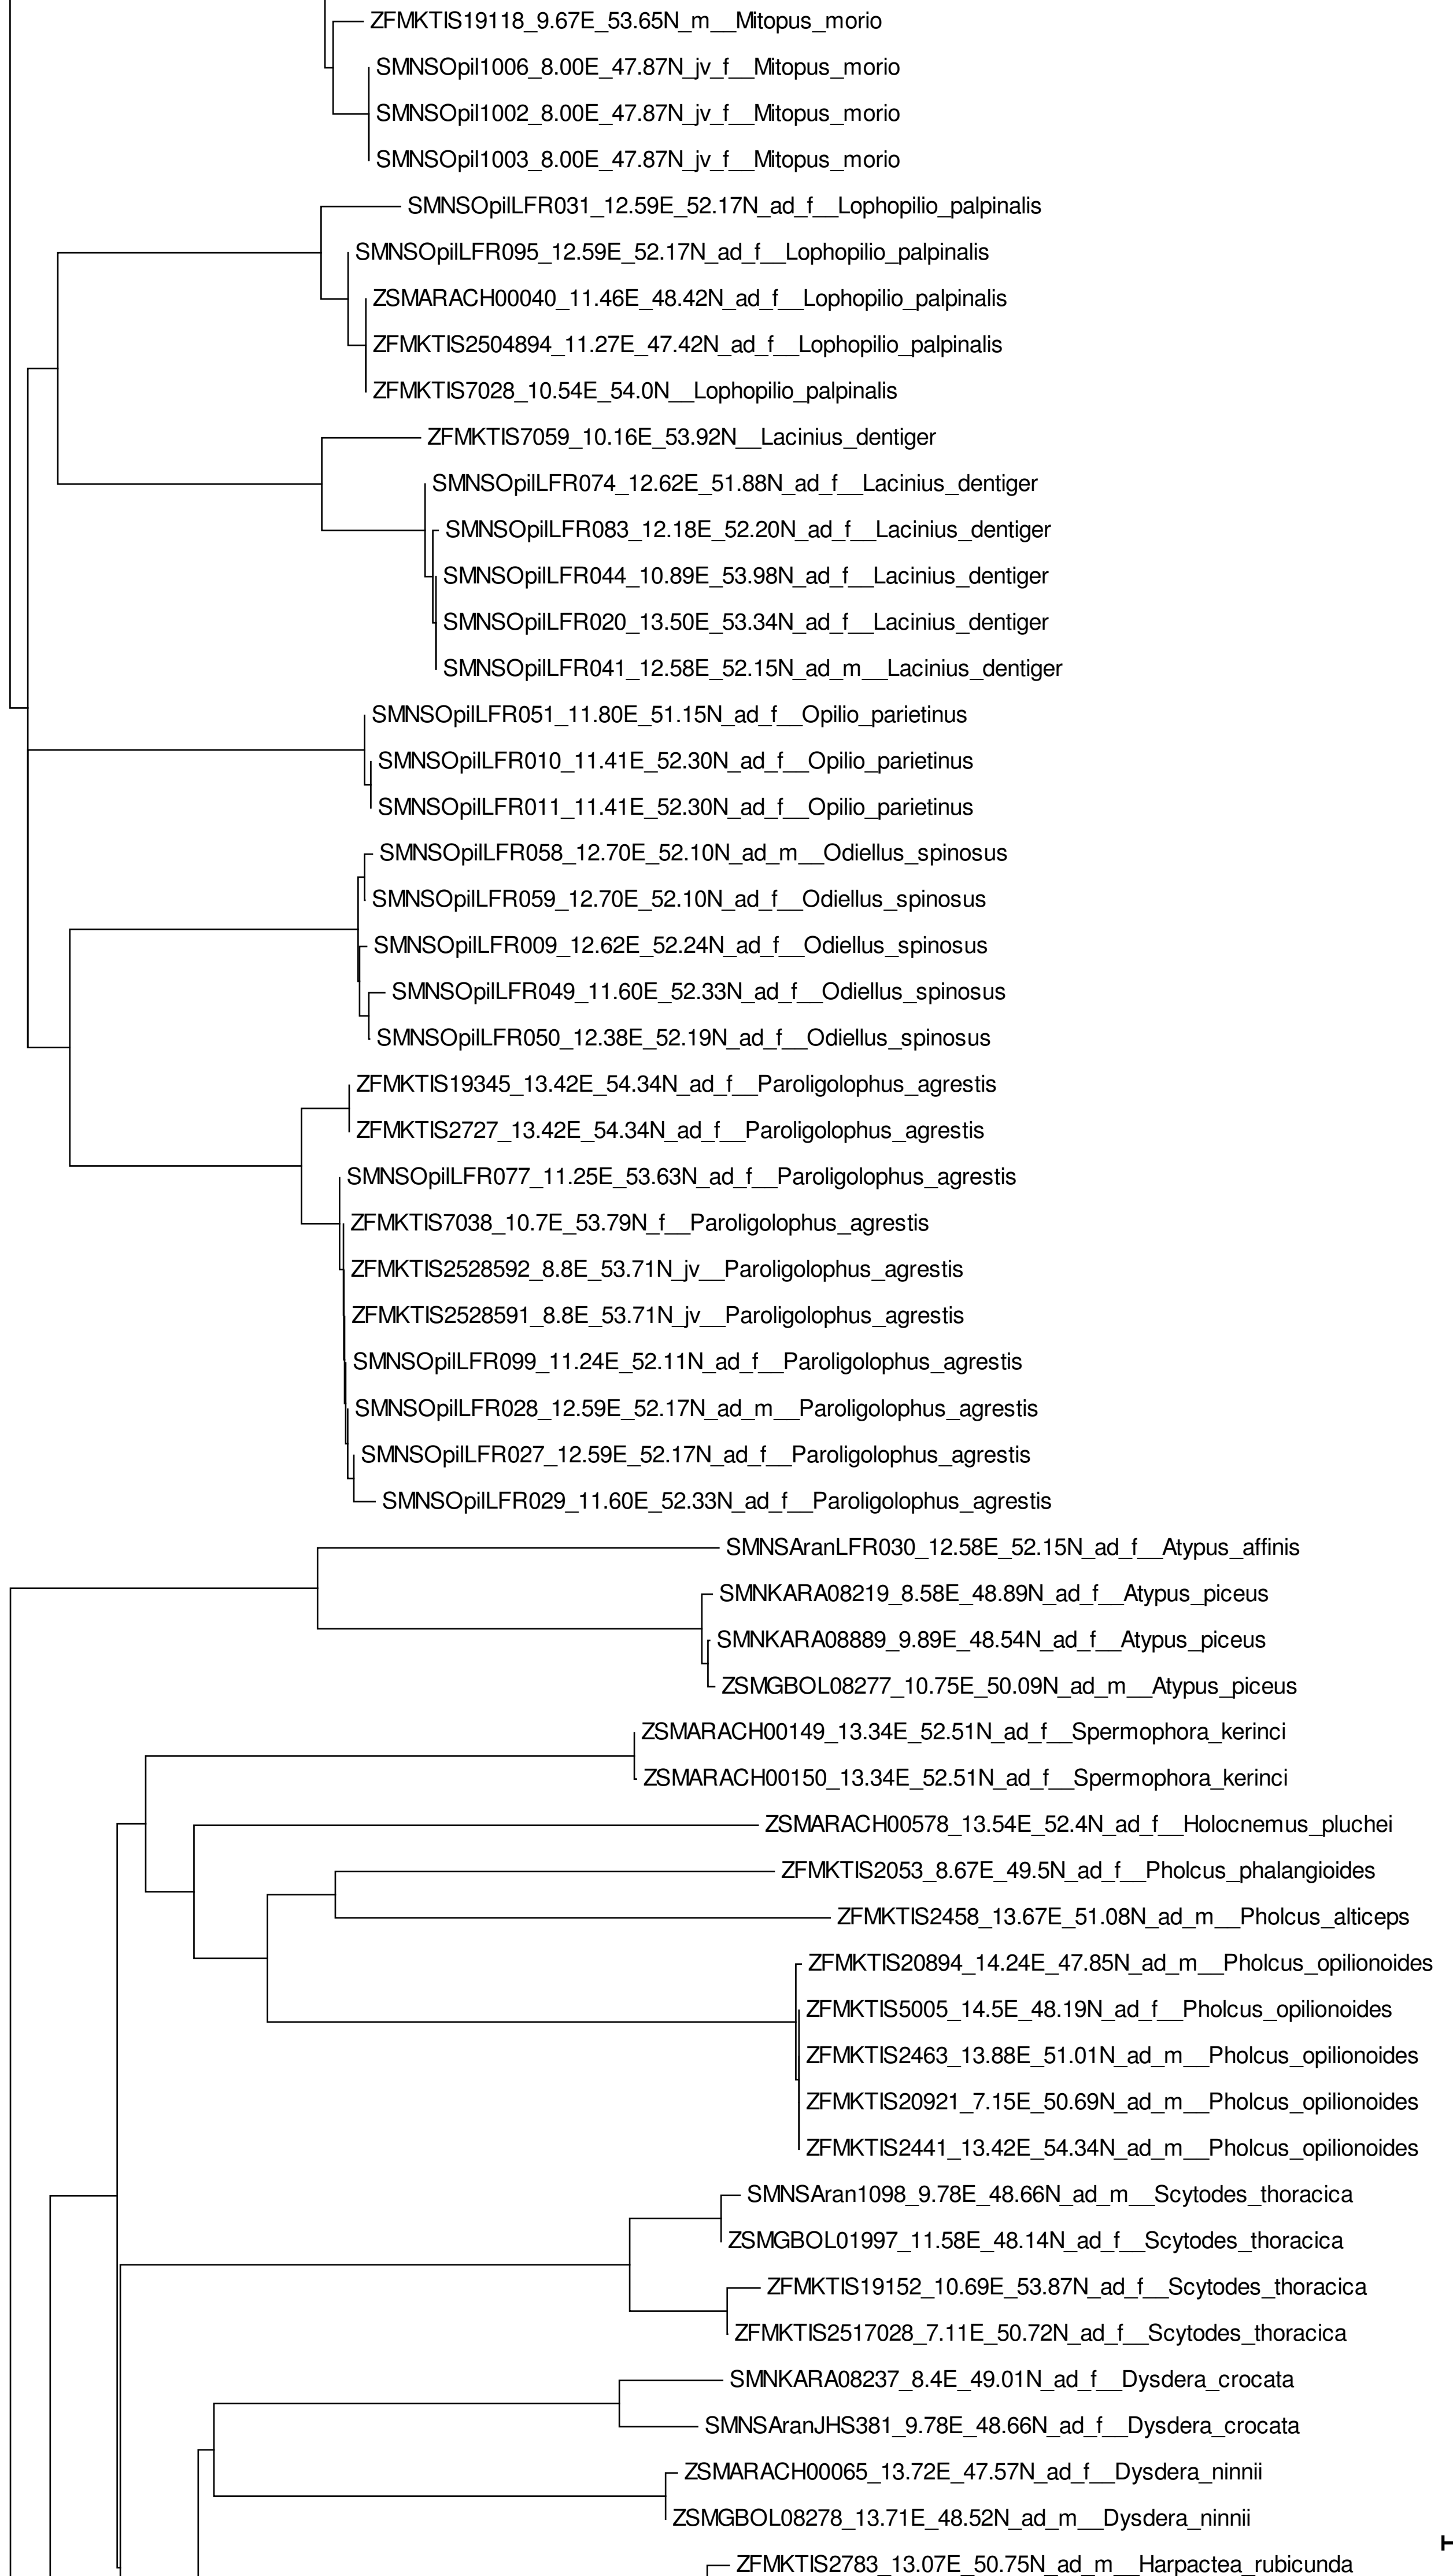



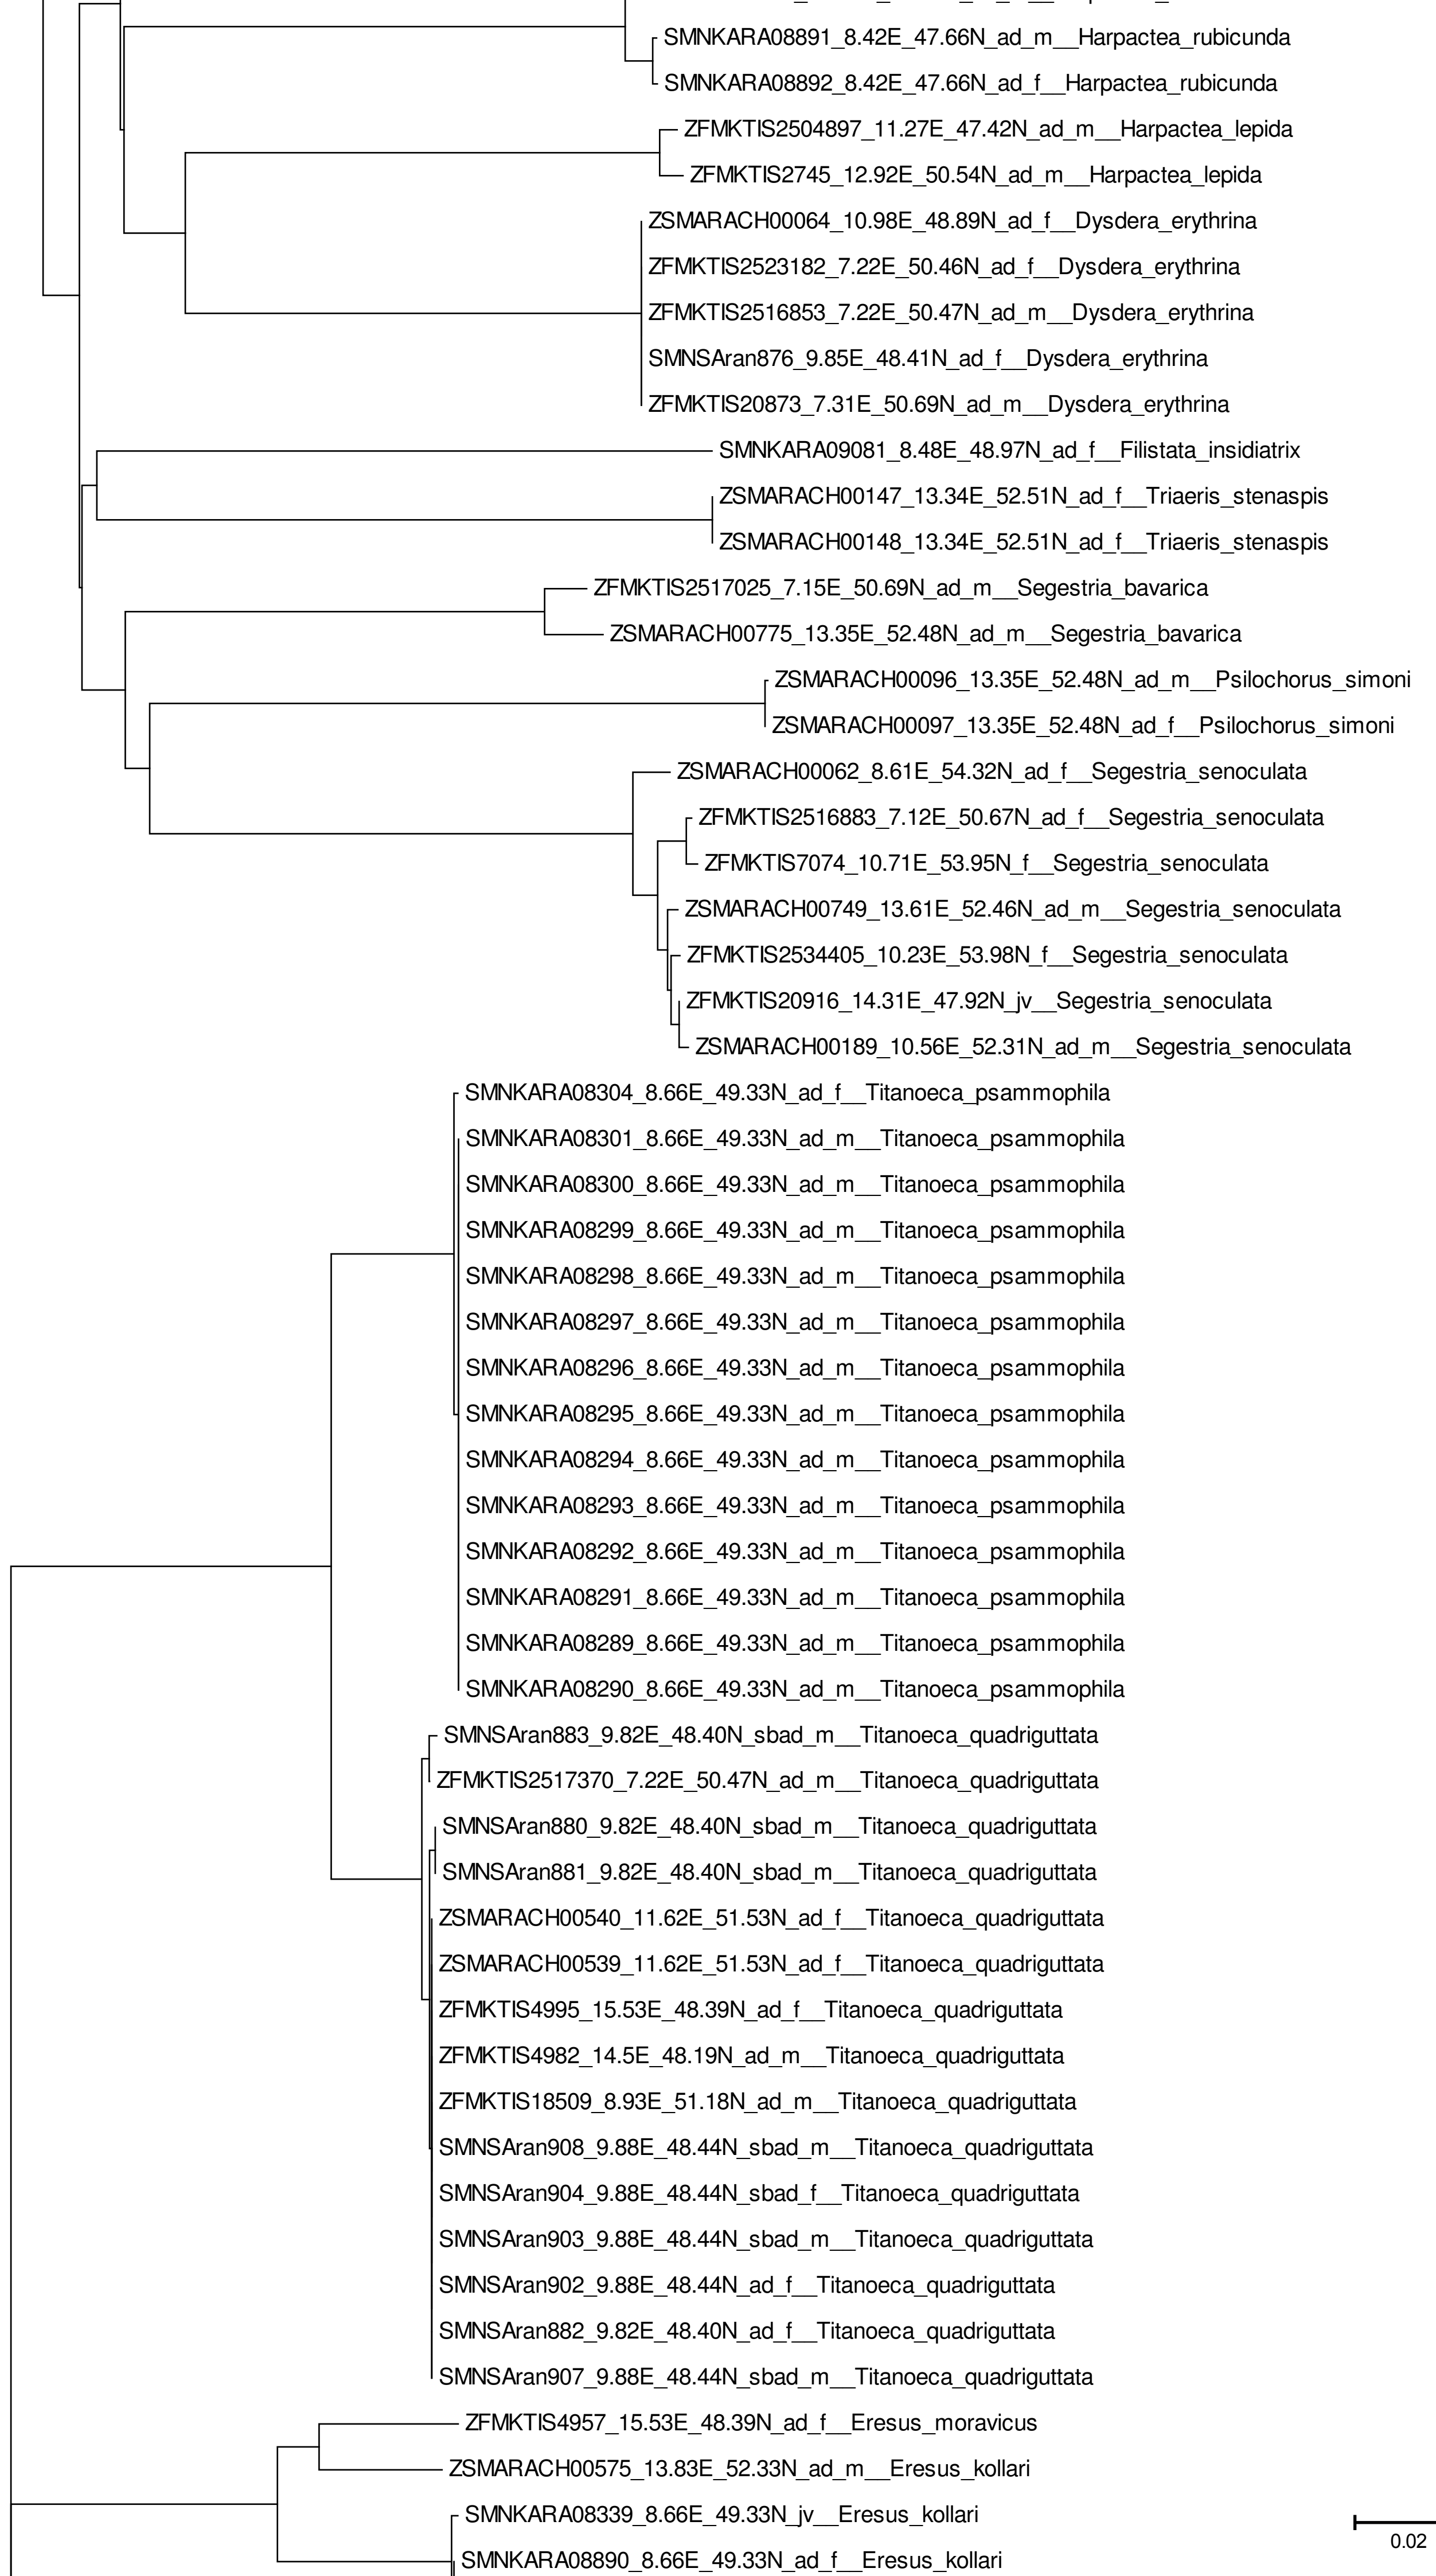

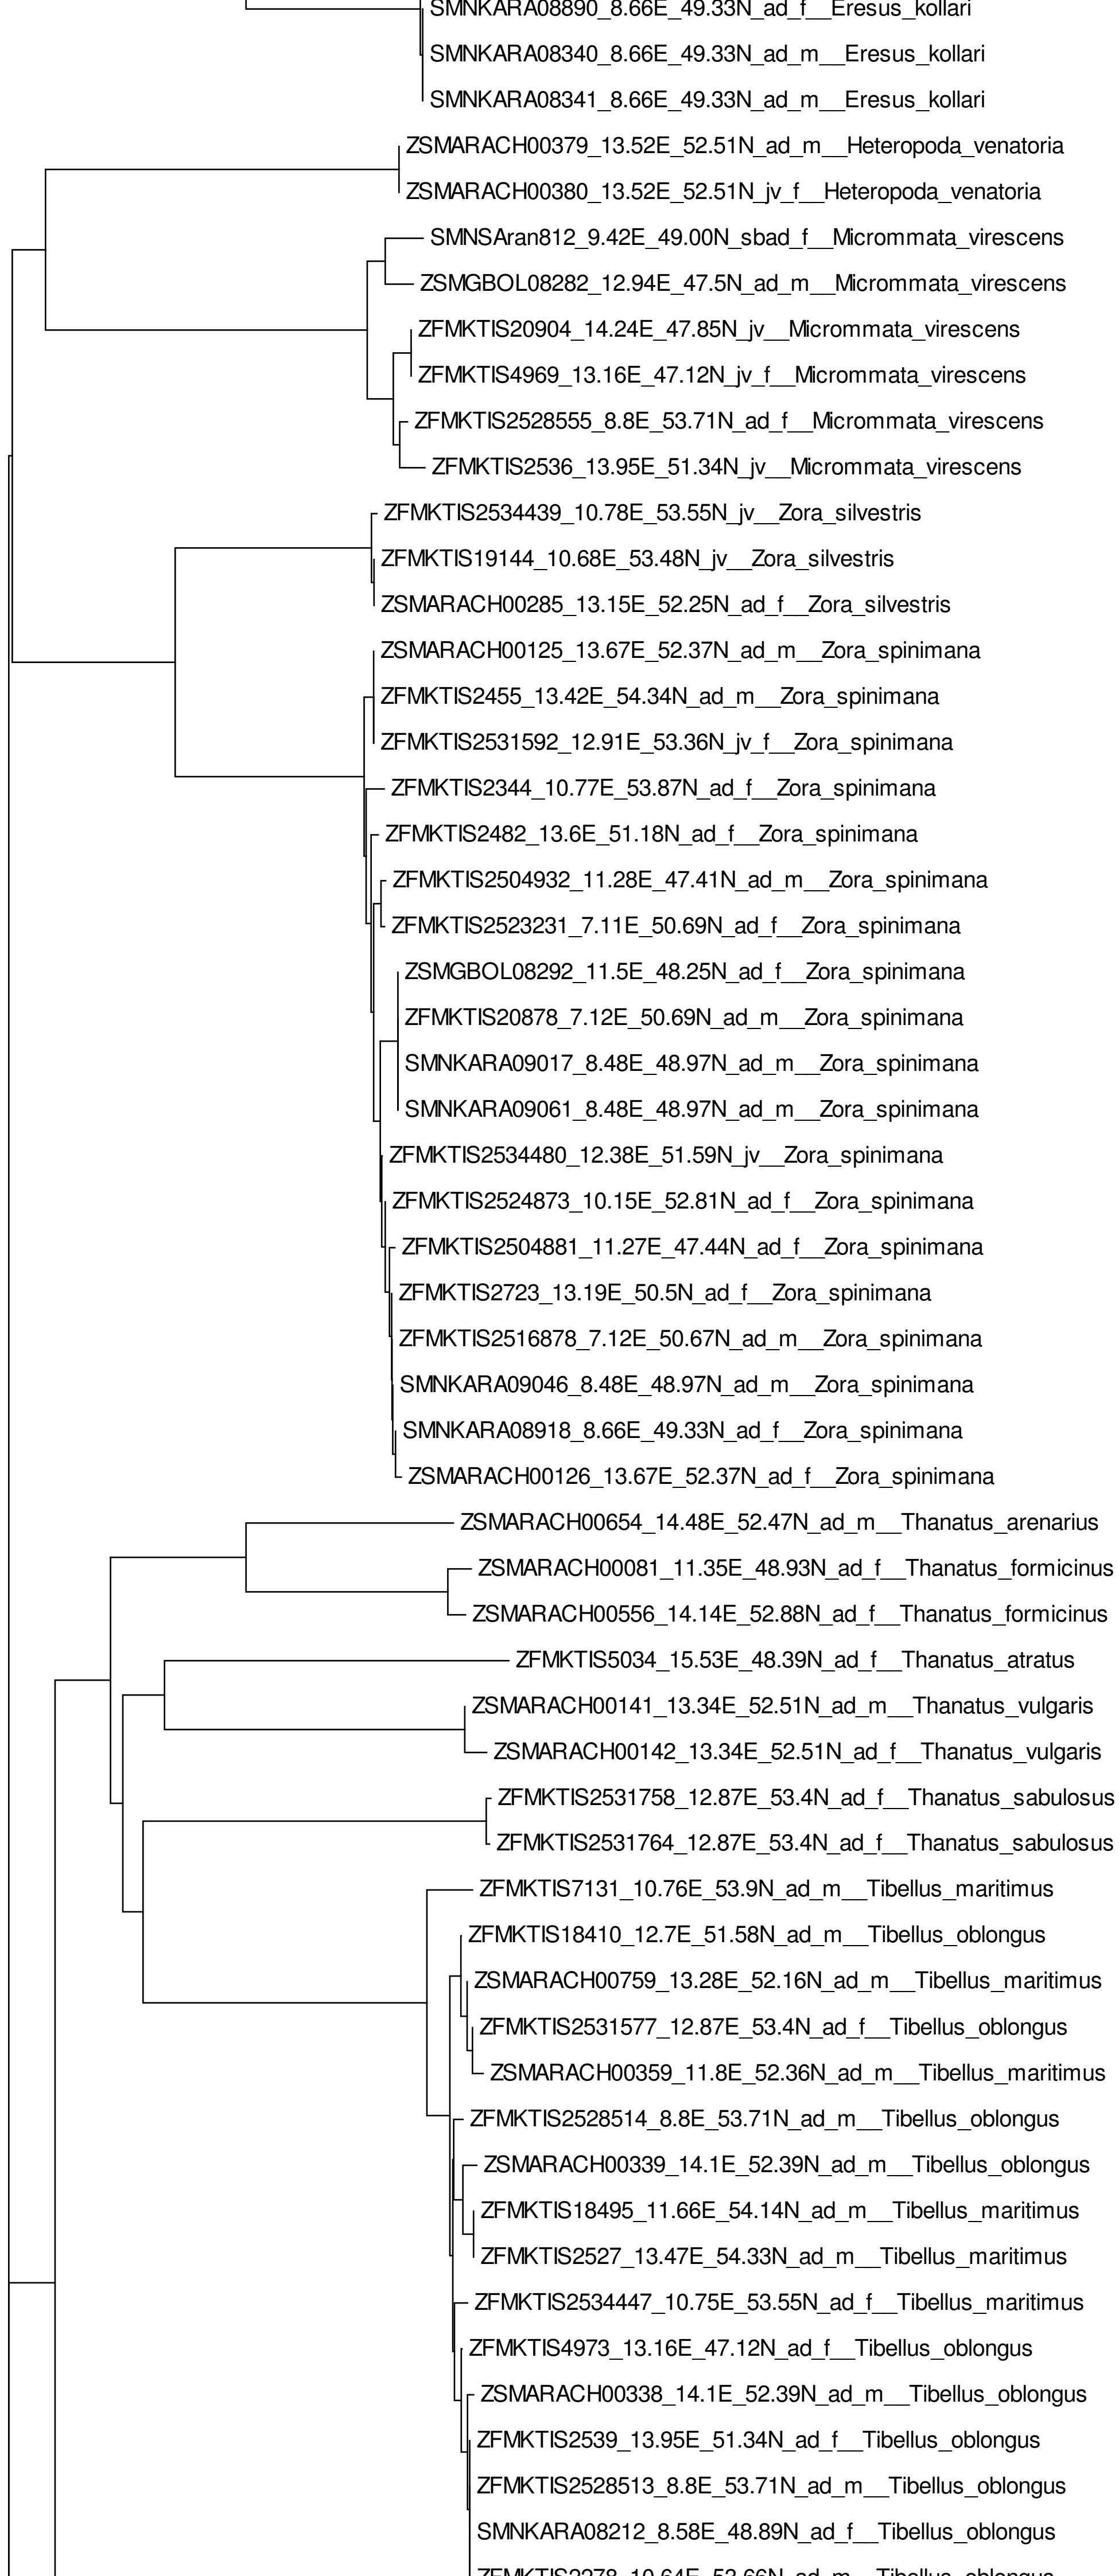



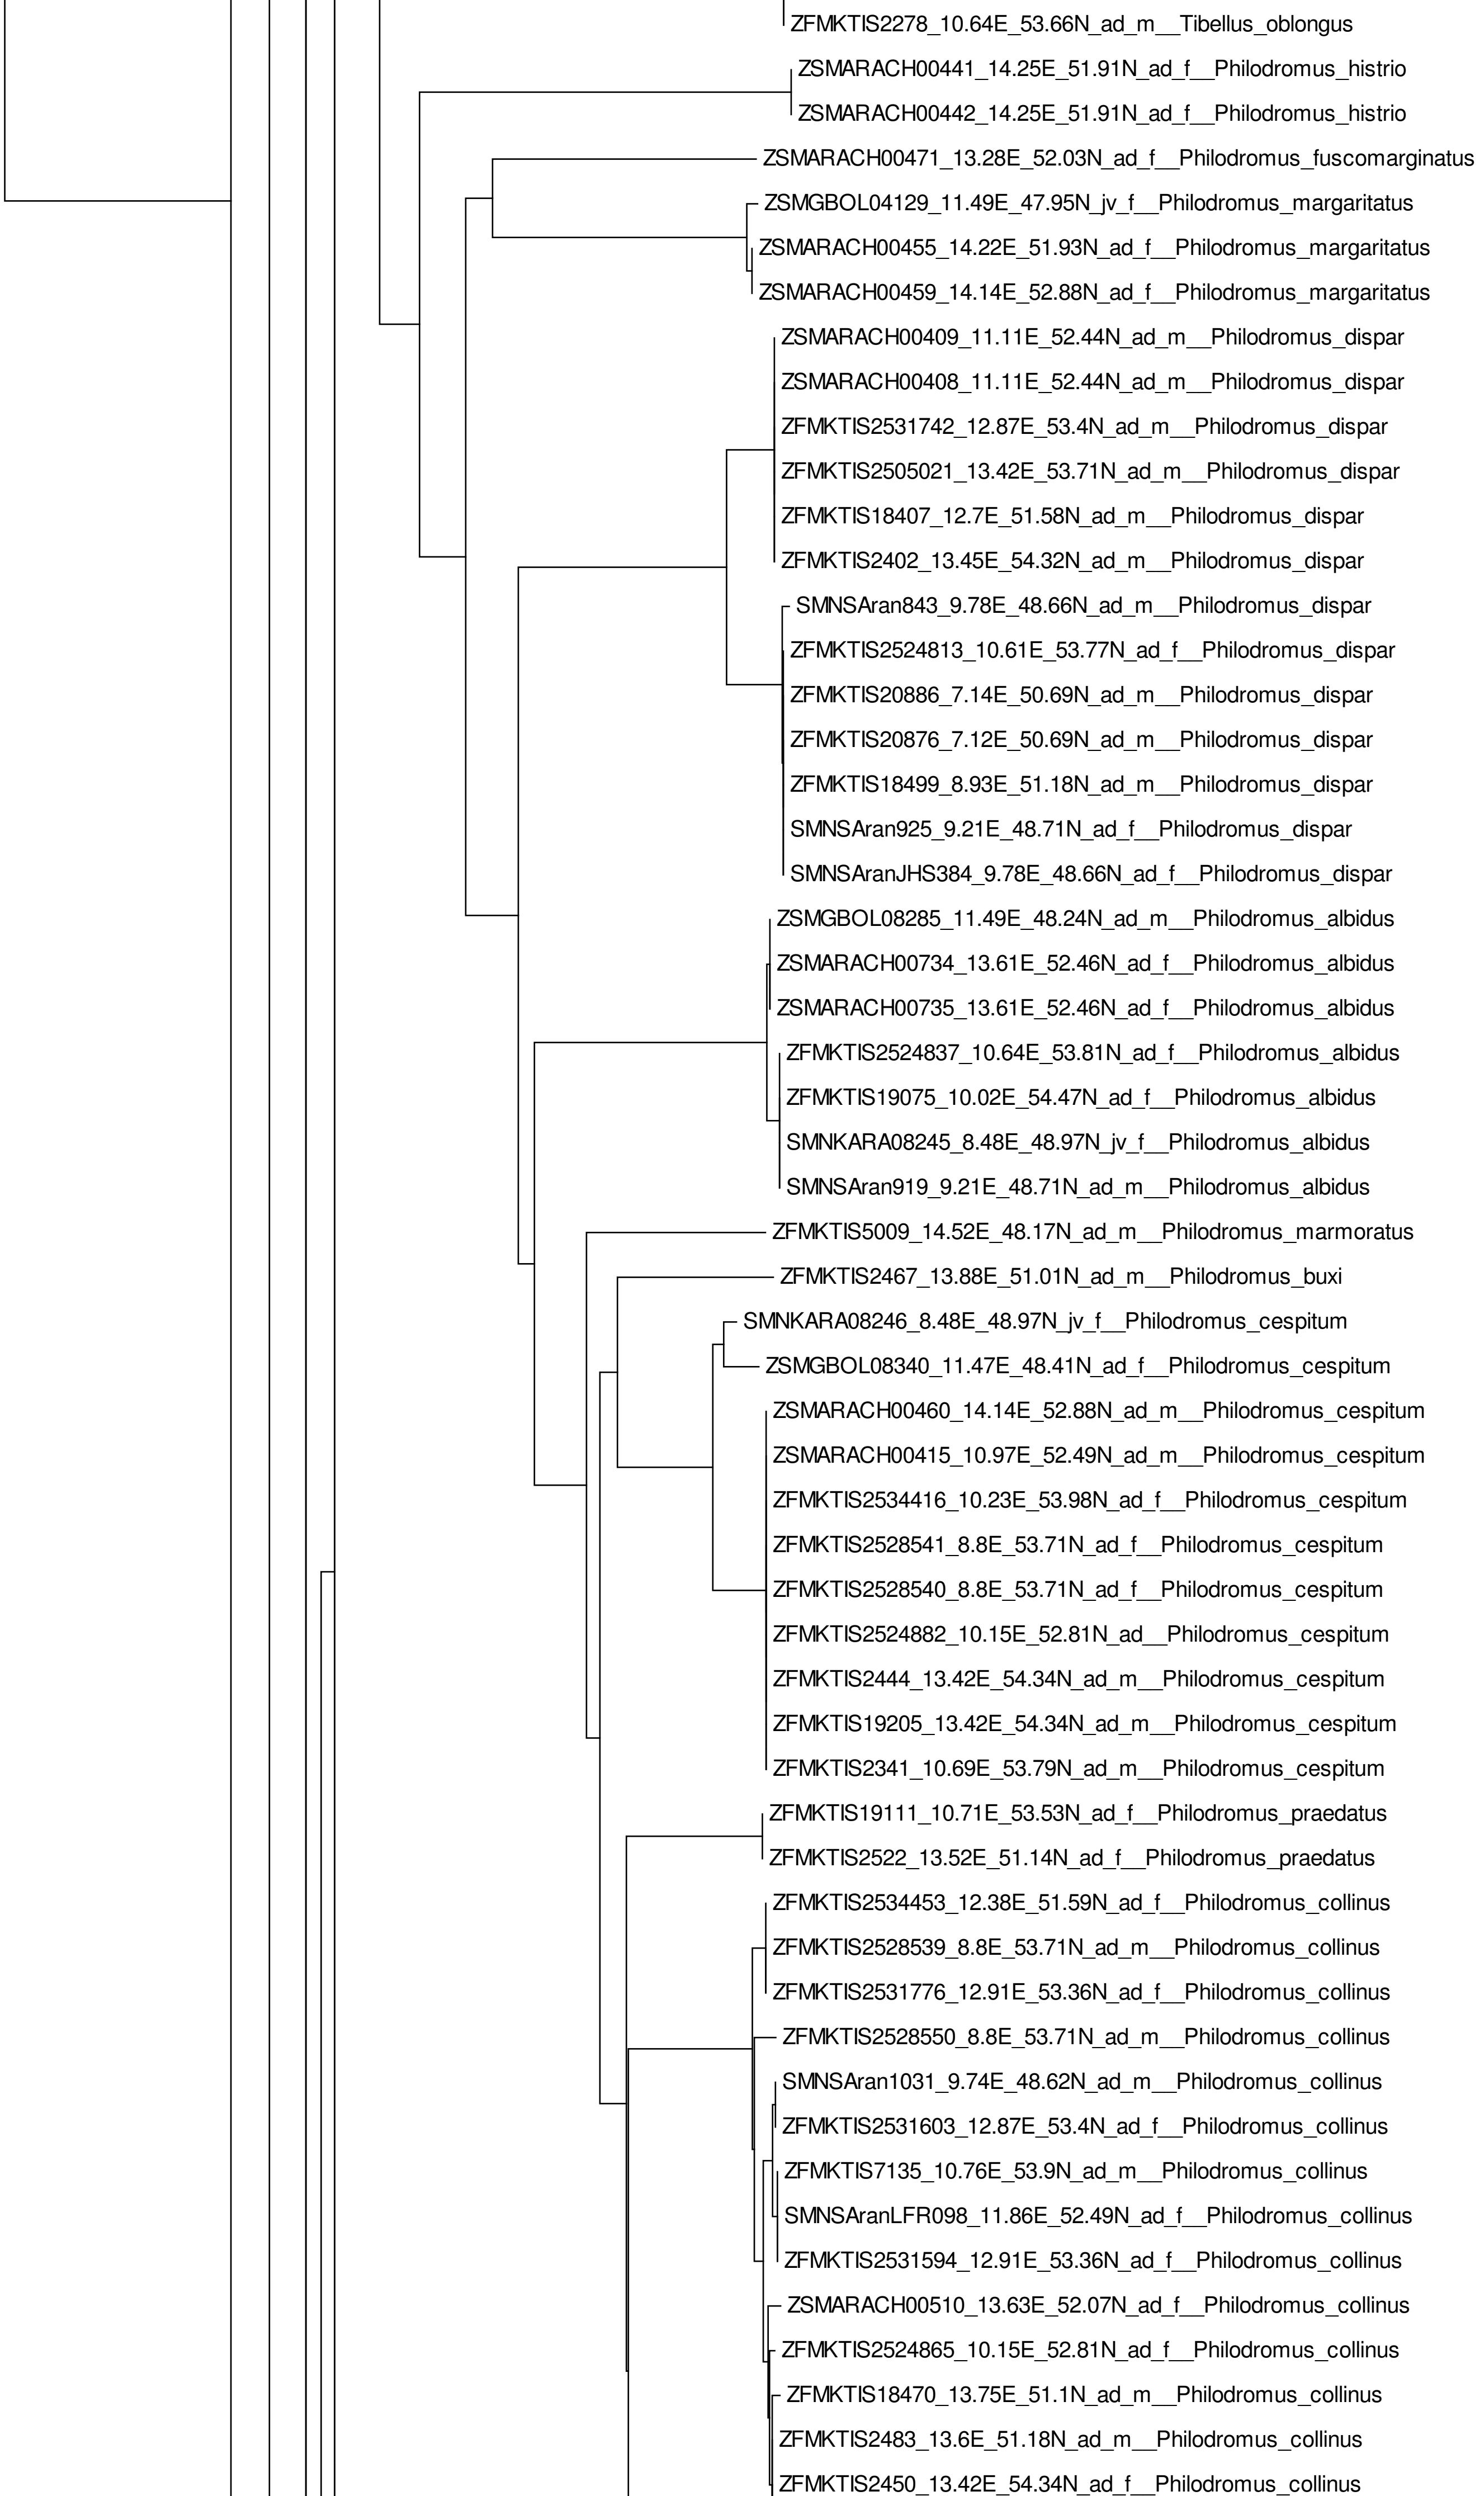

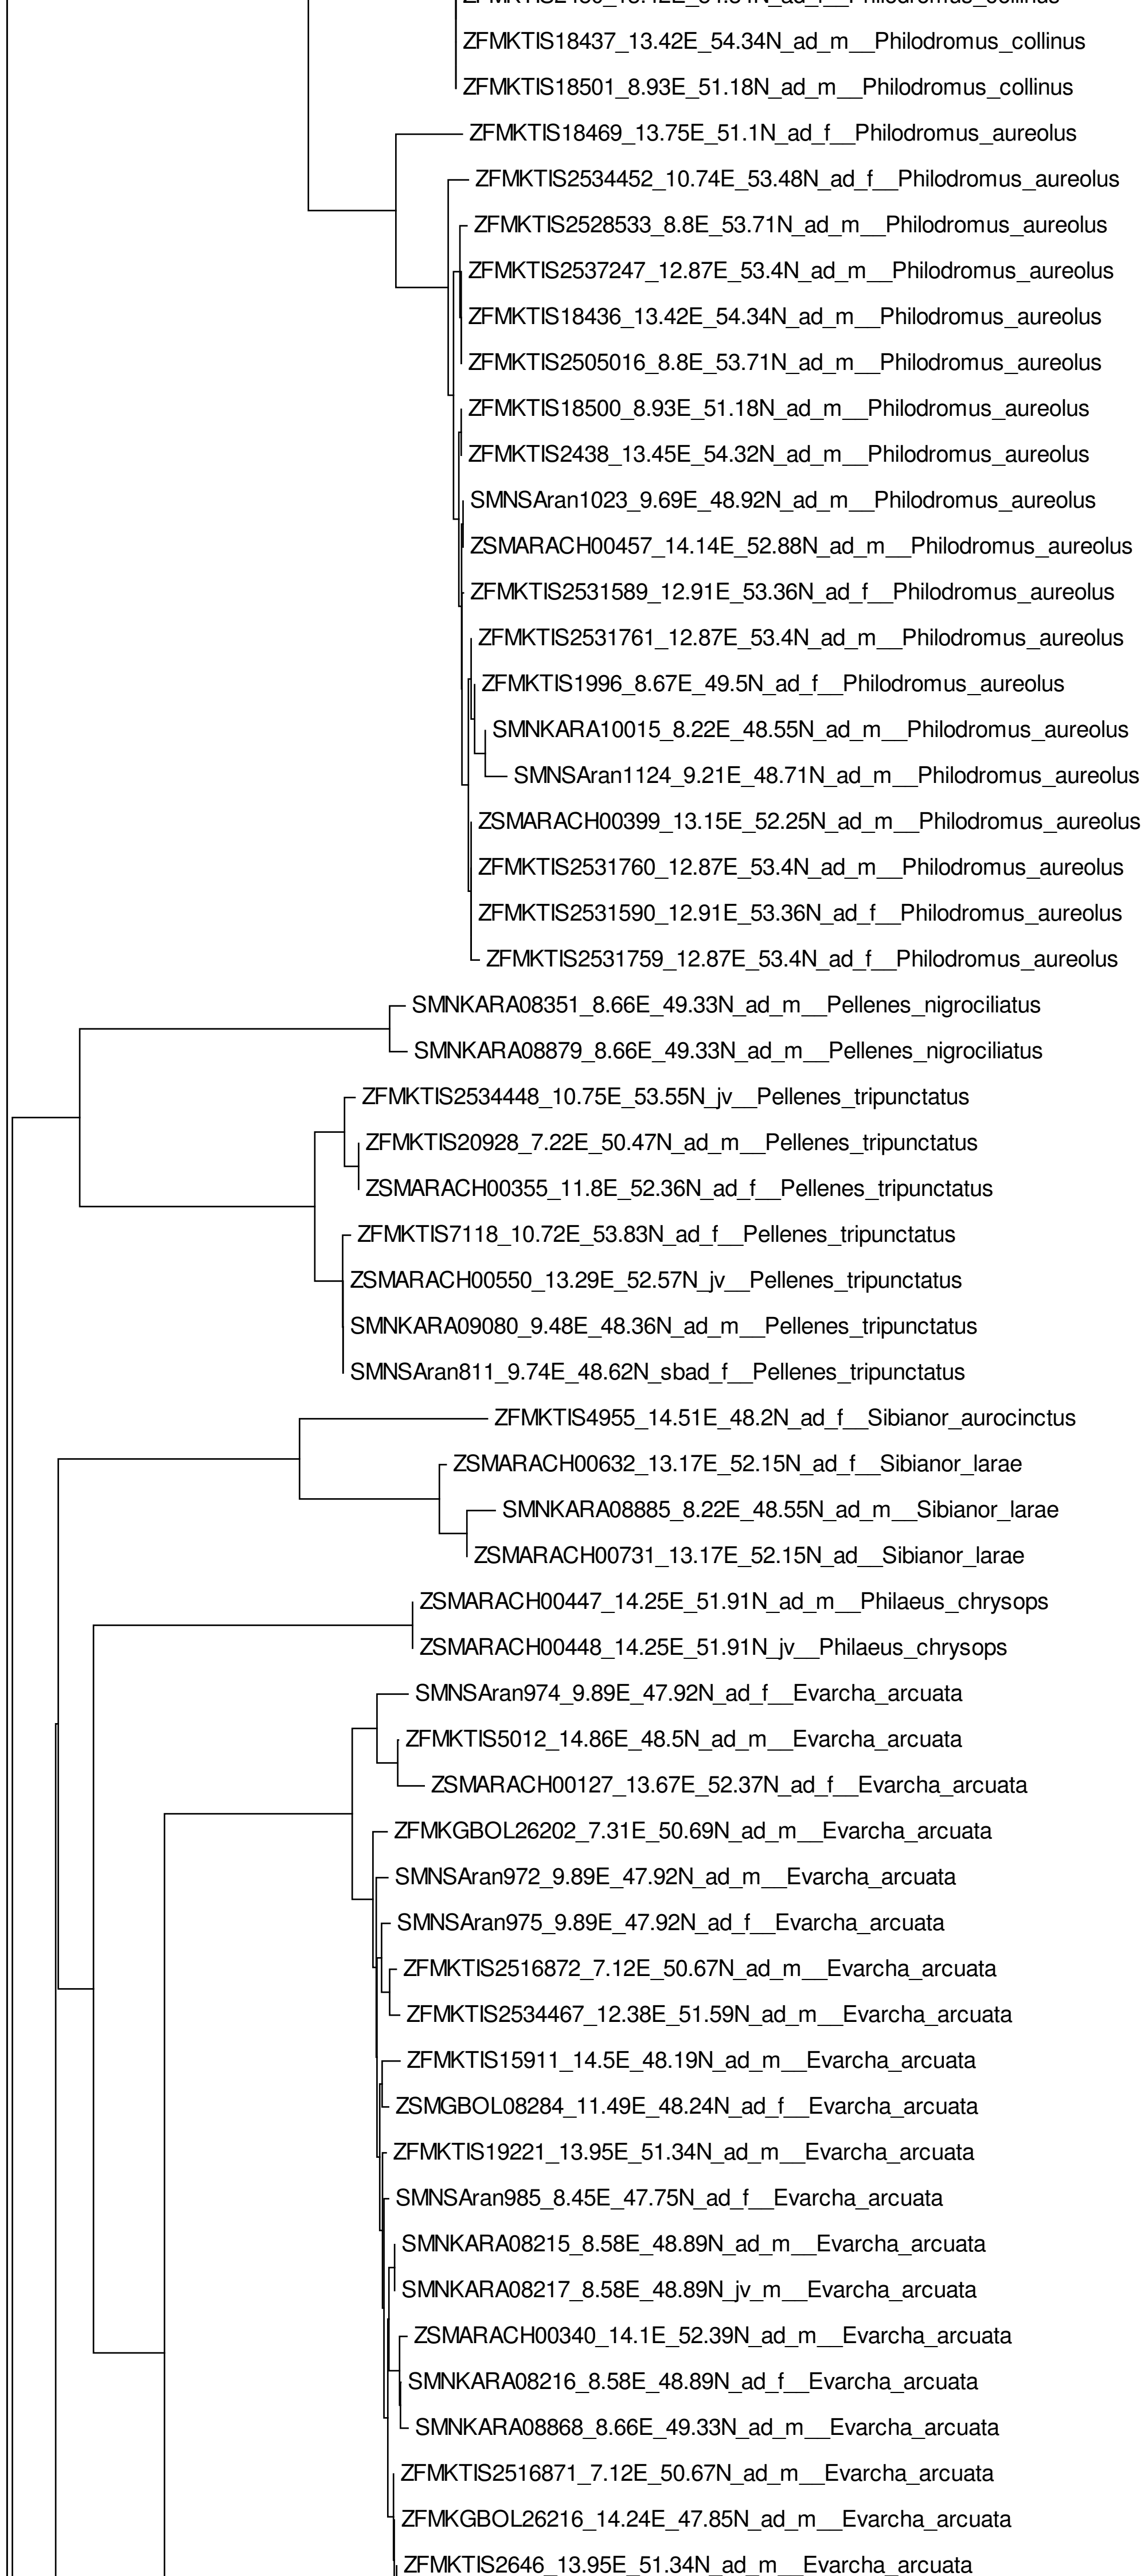



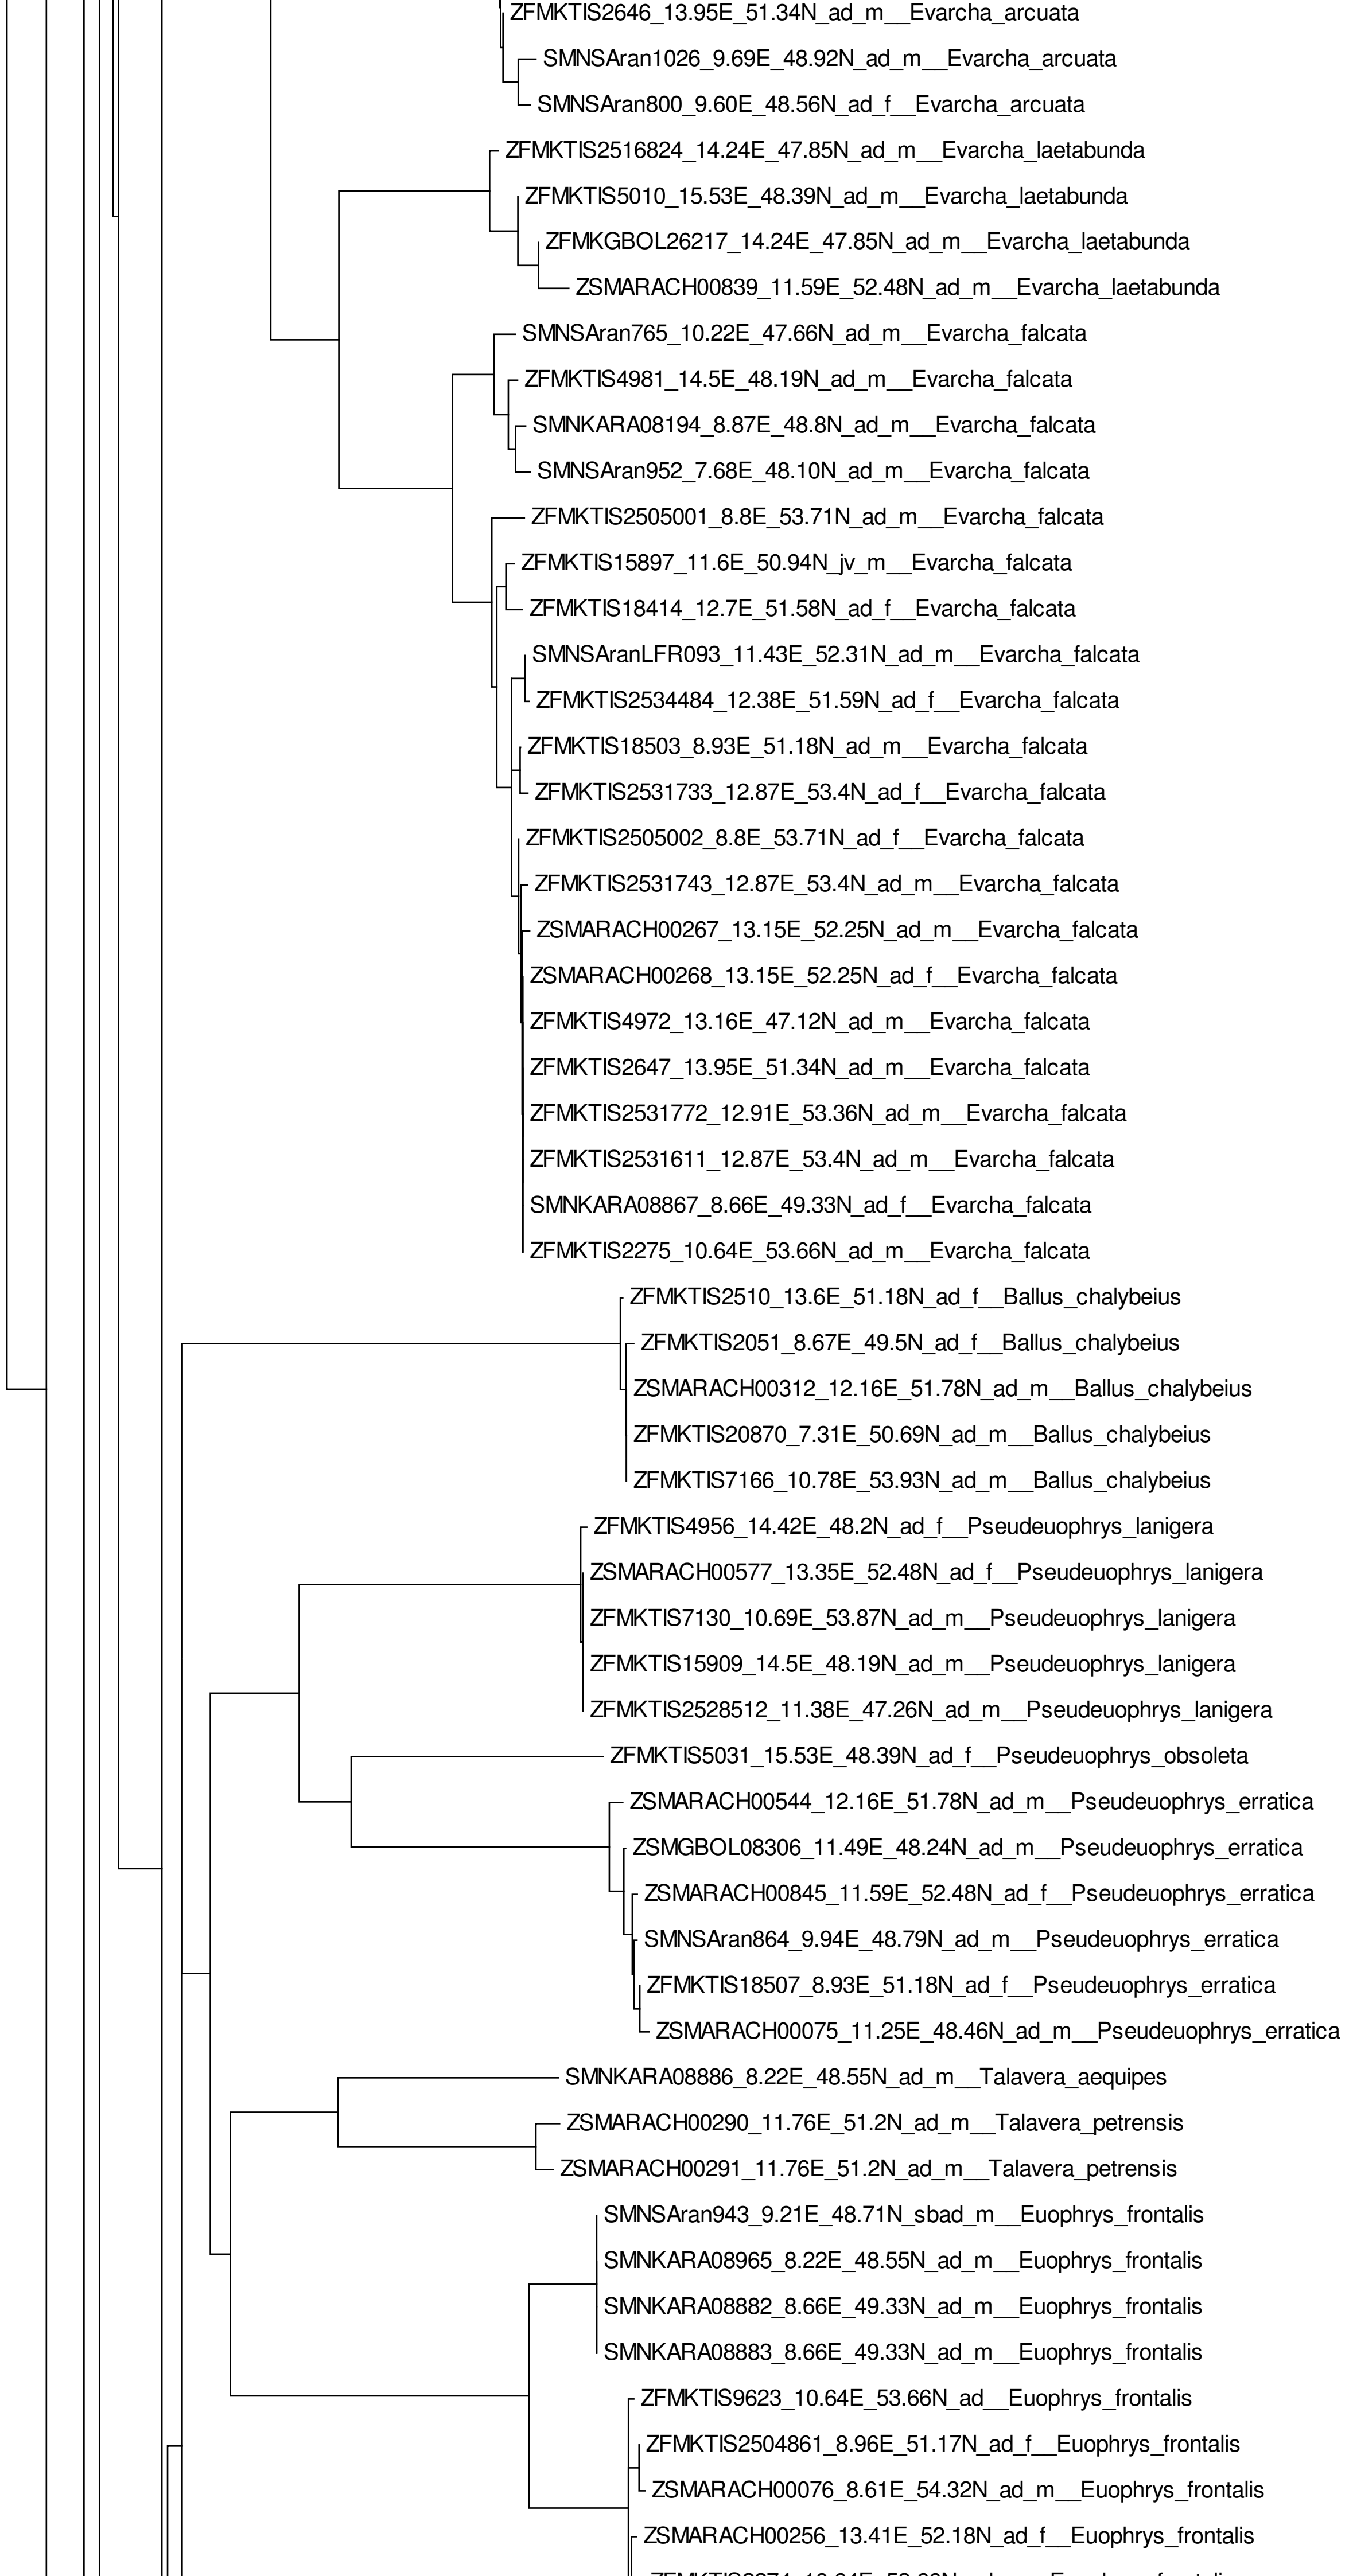

0.02

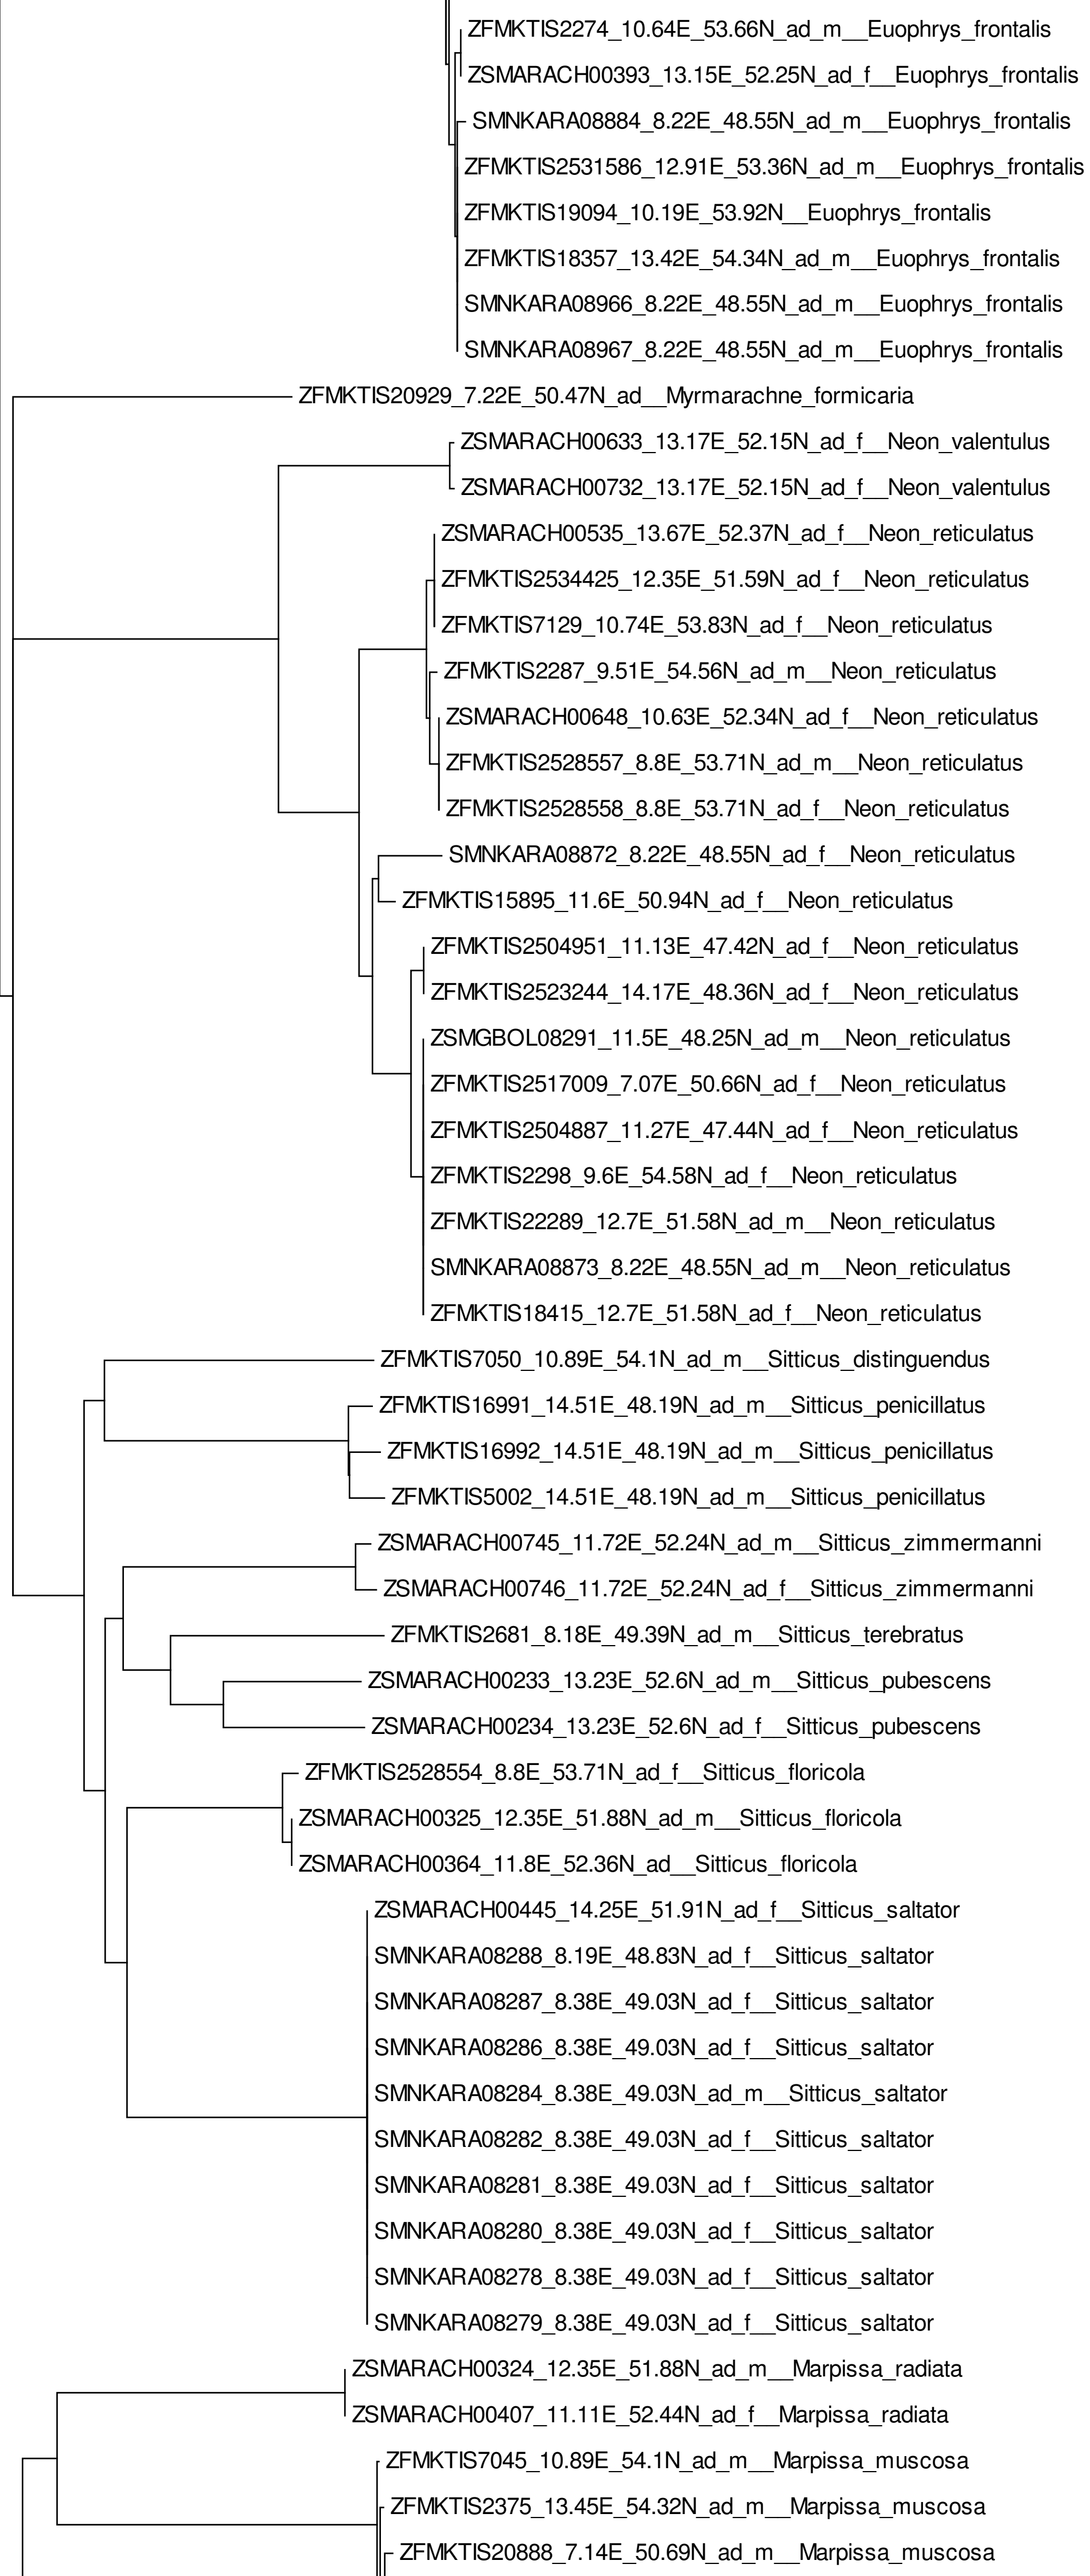



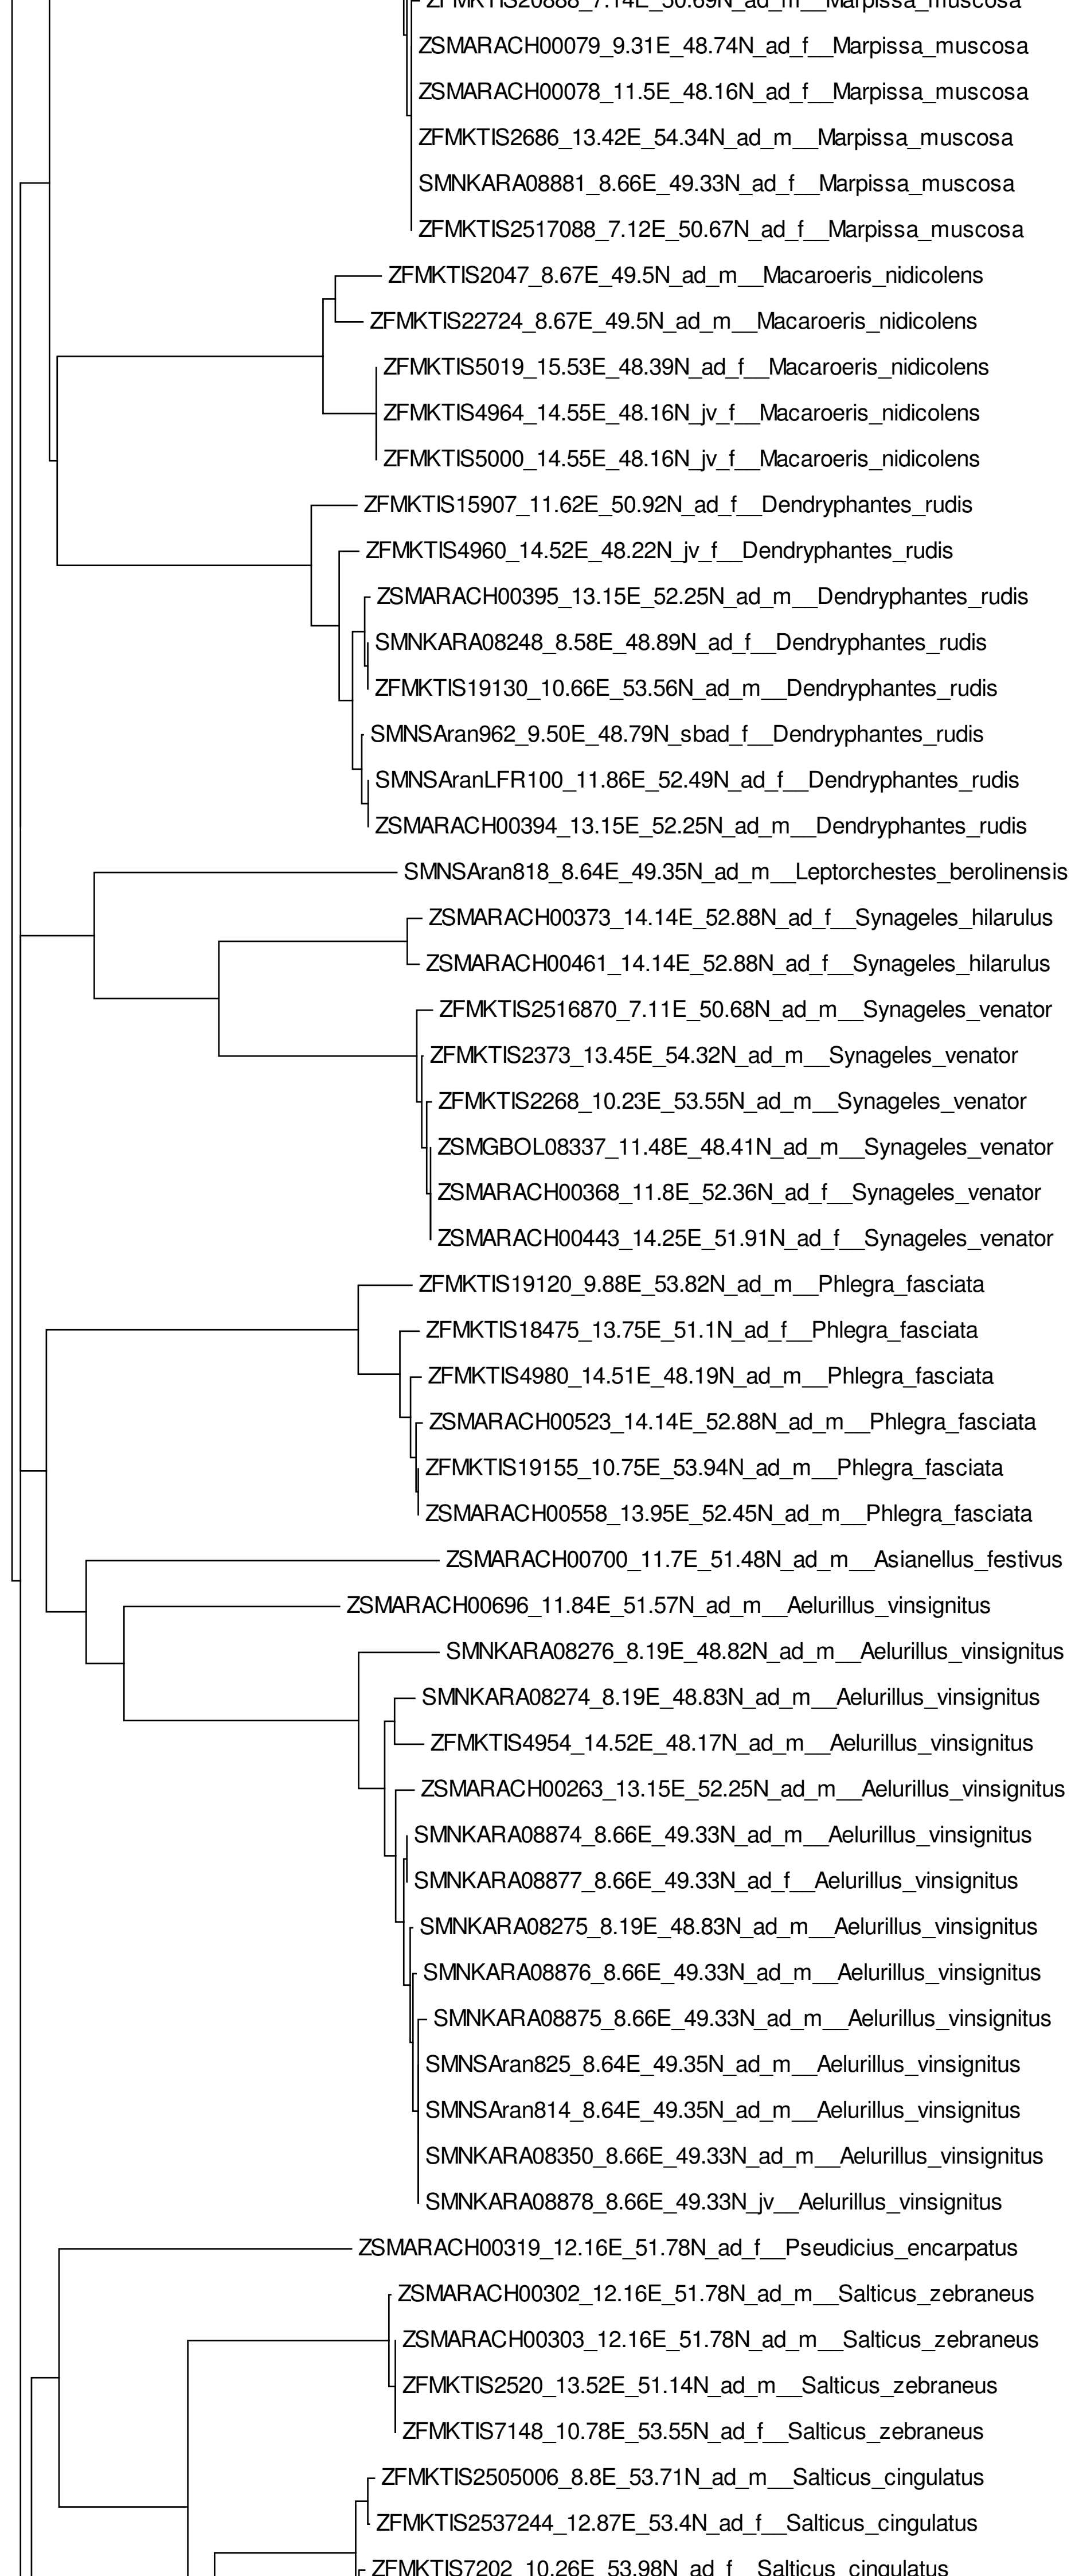

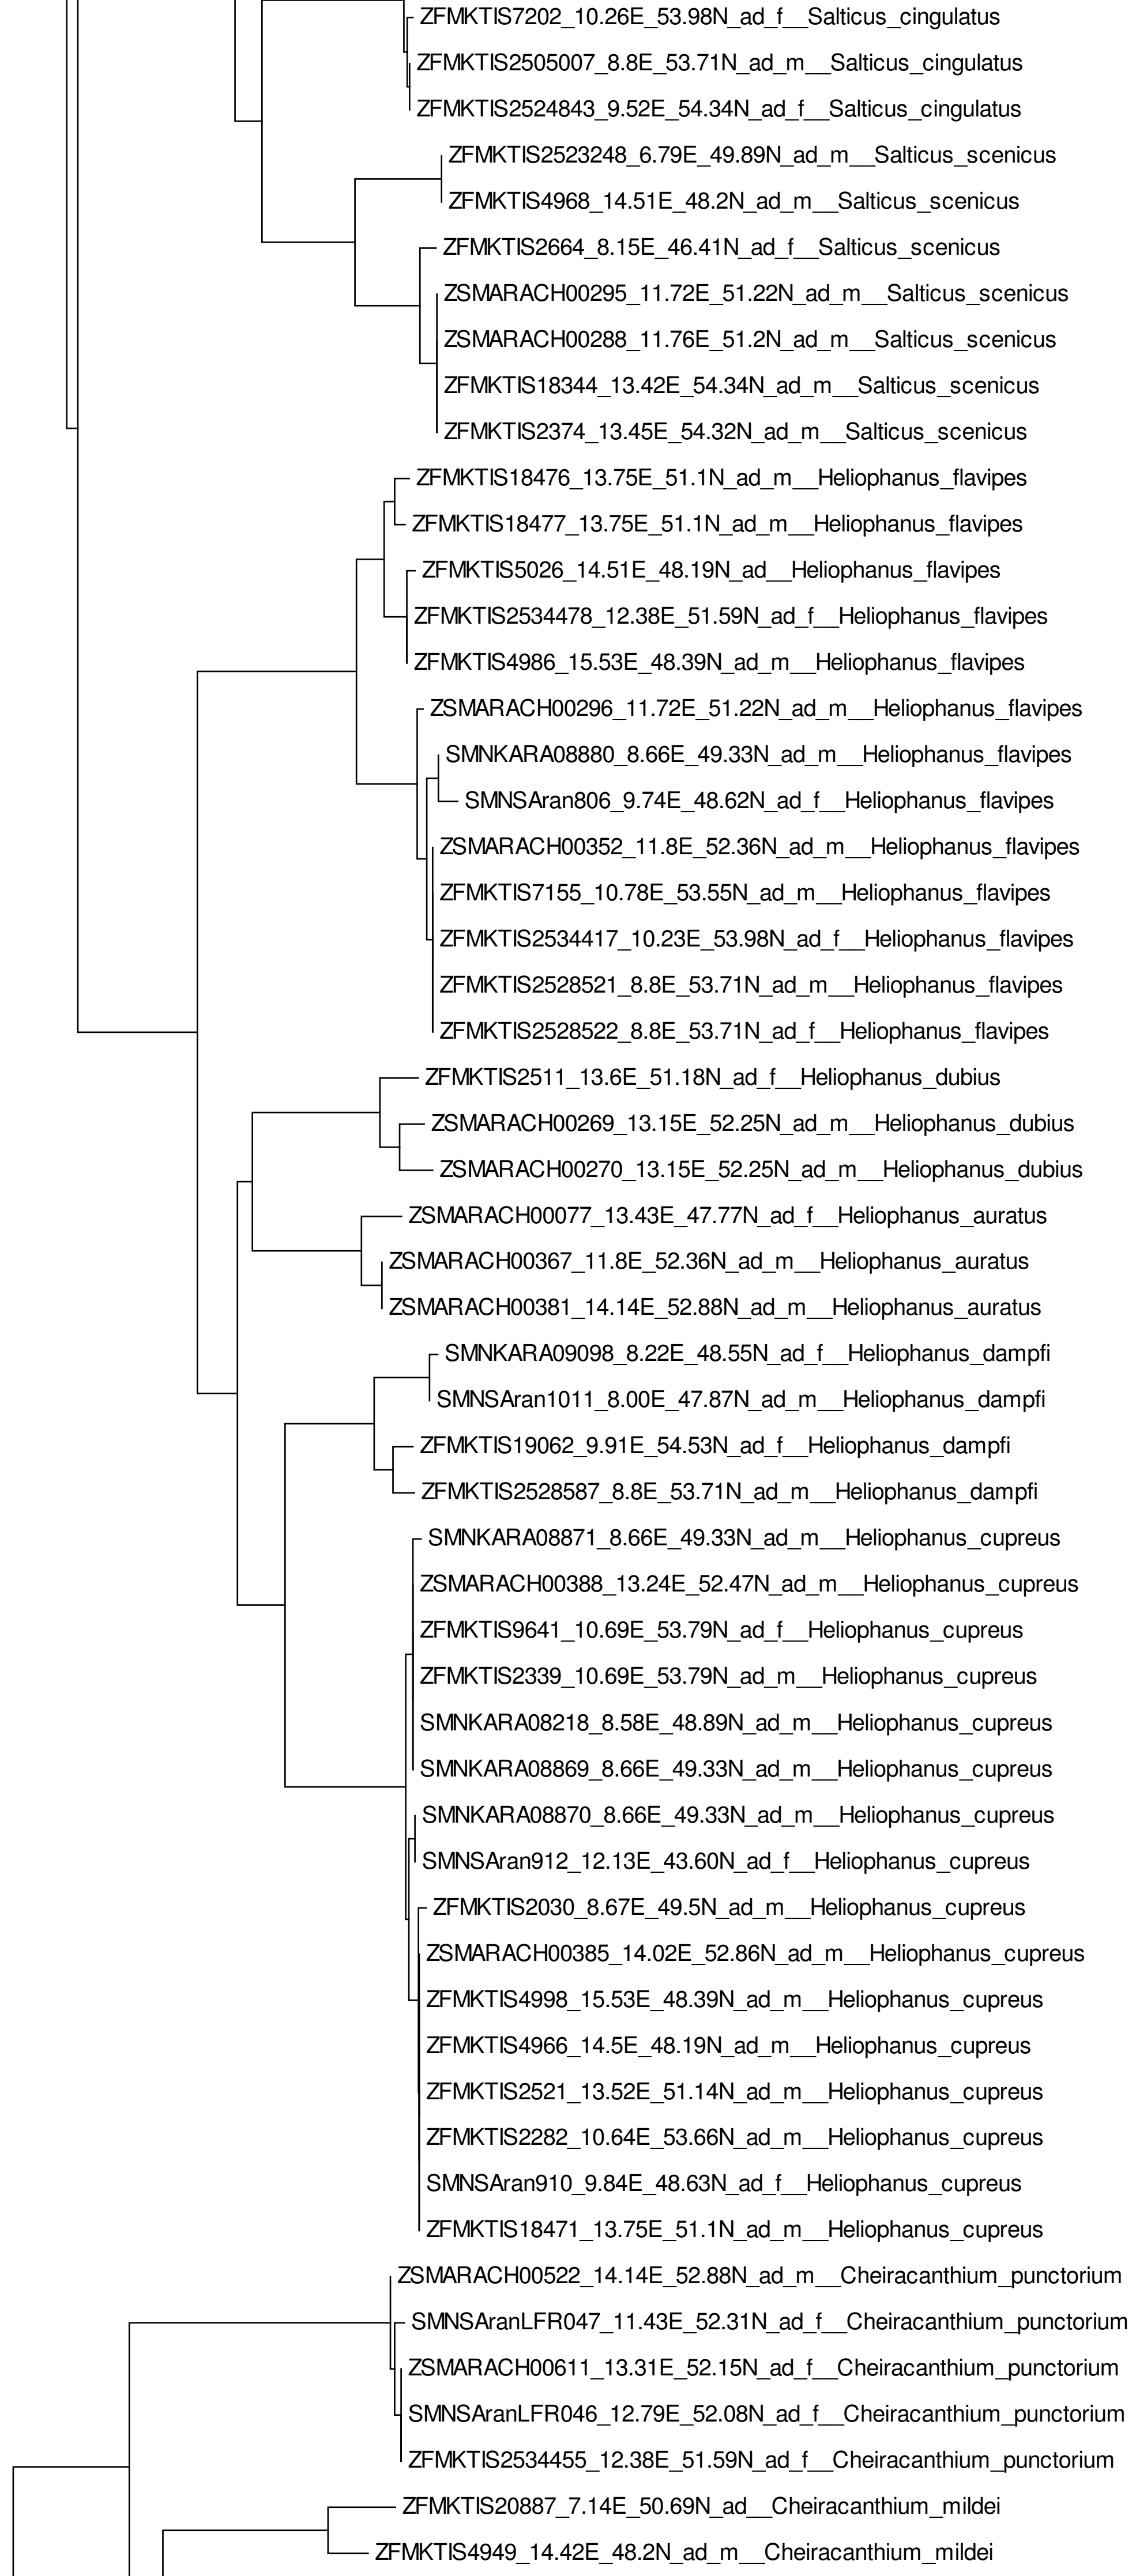

0.02



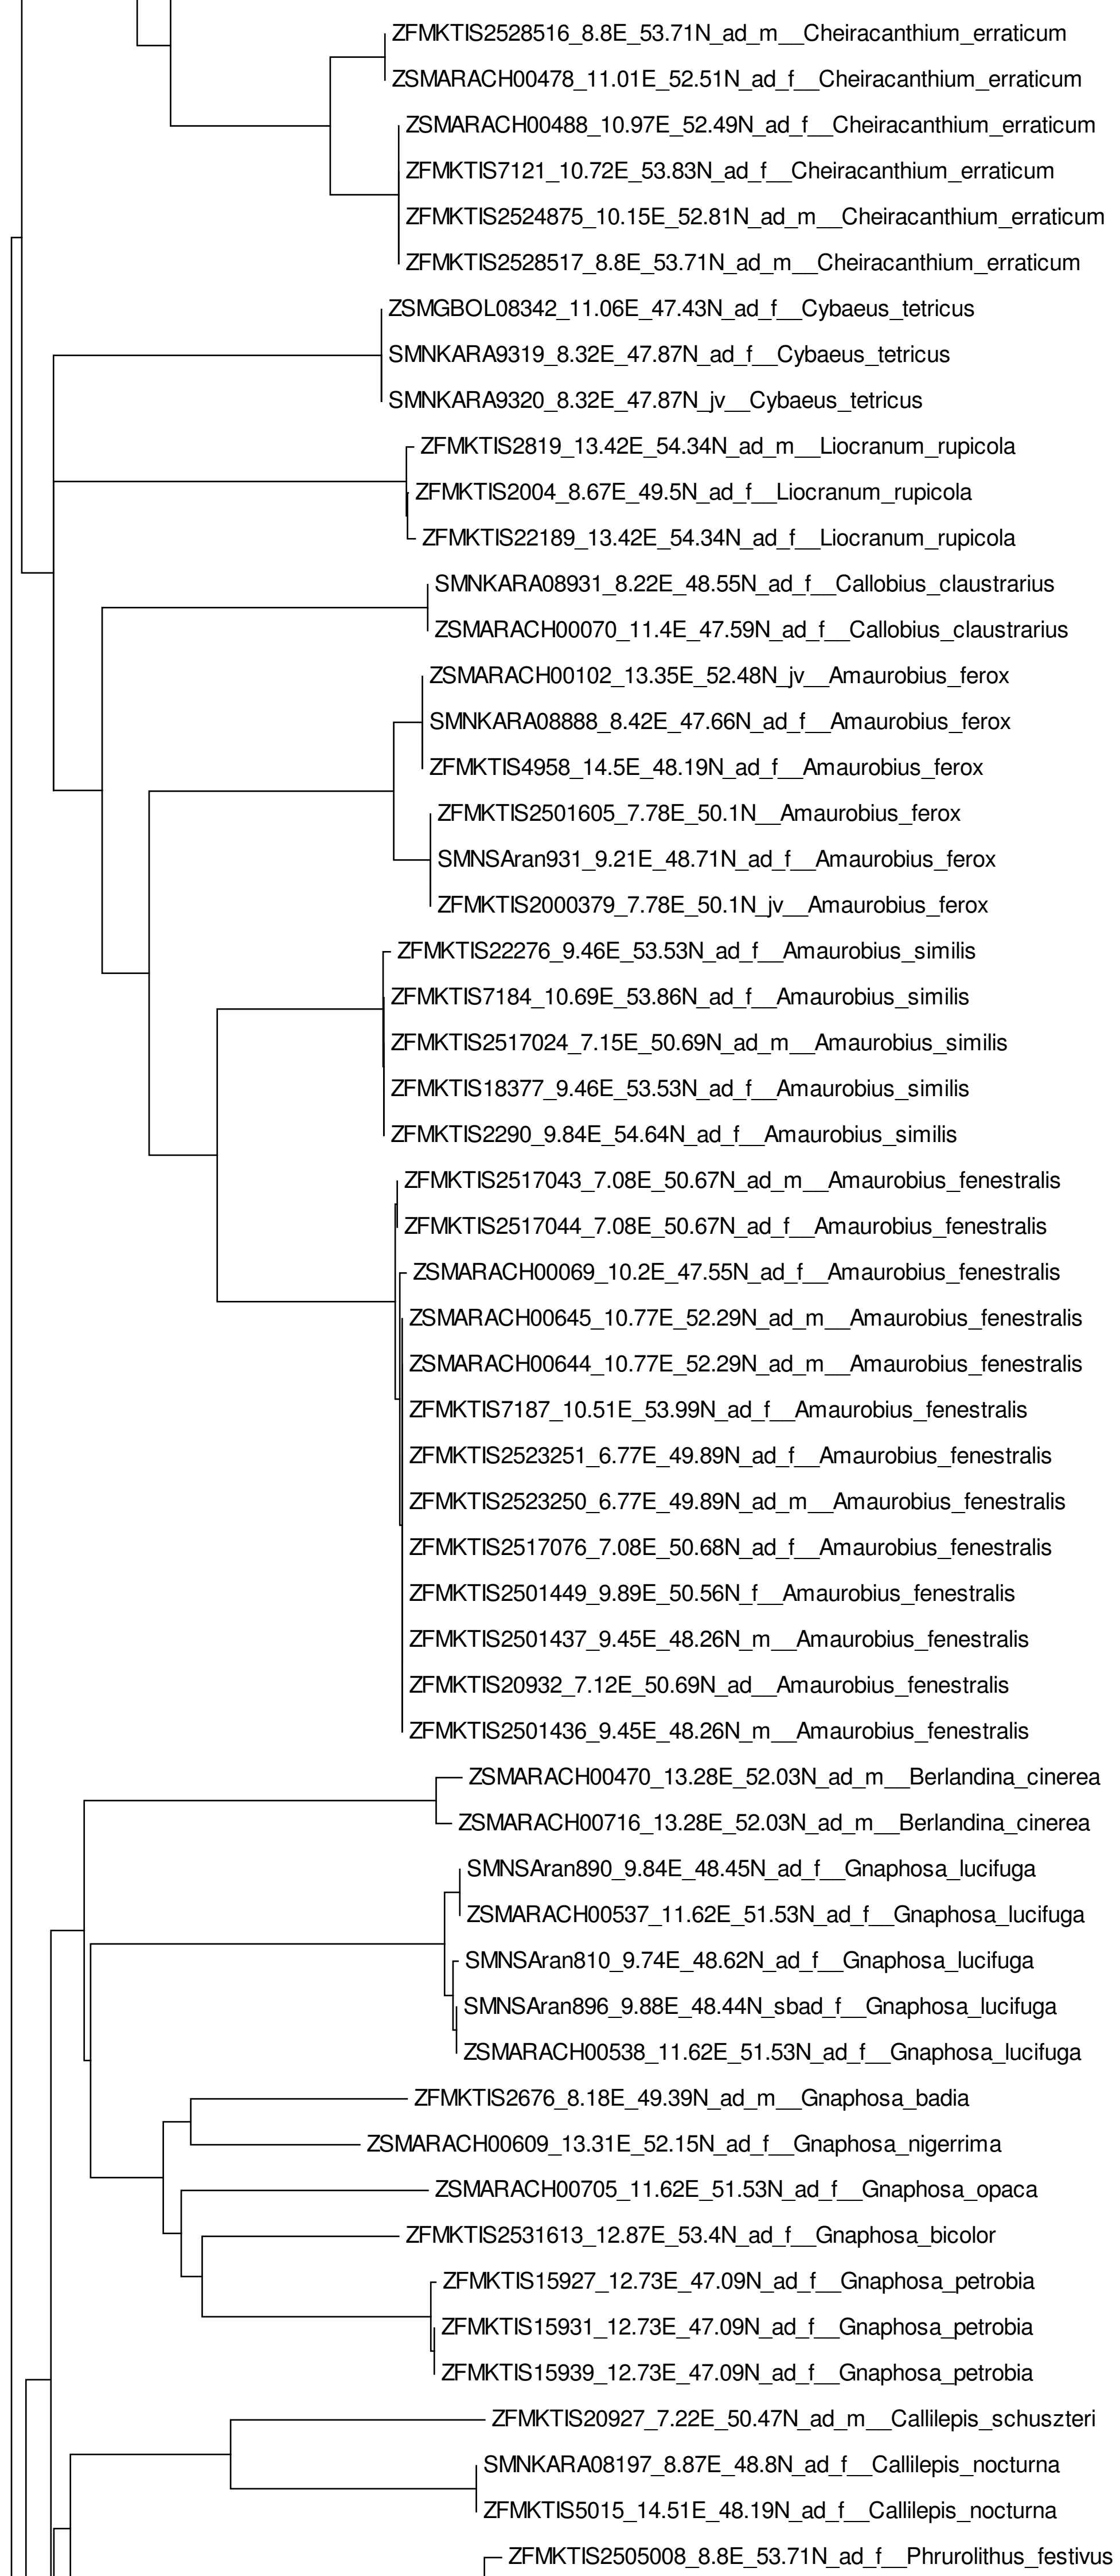

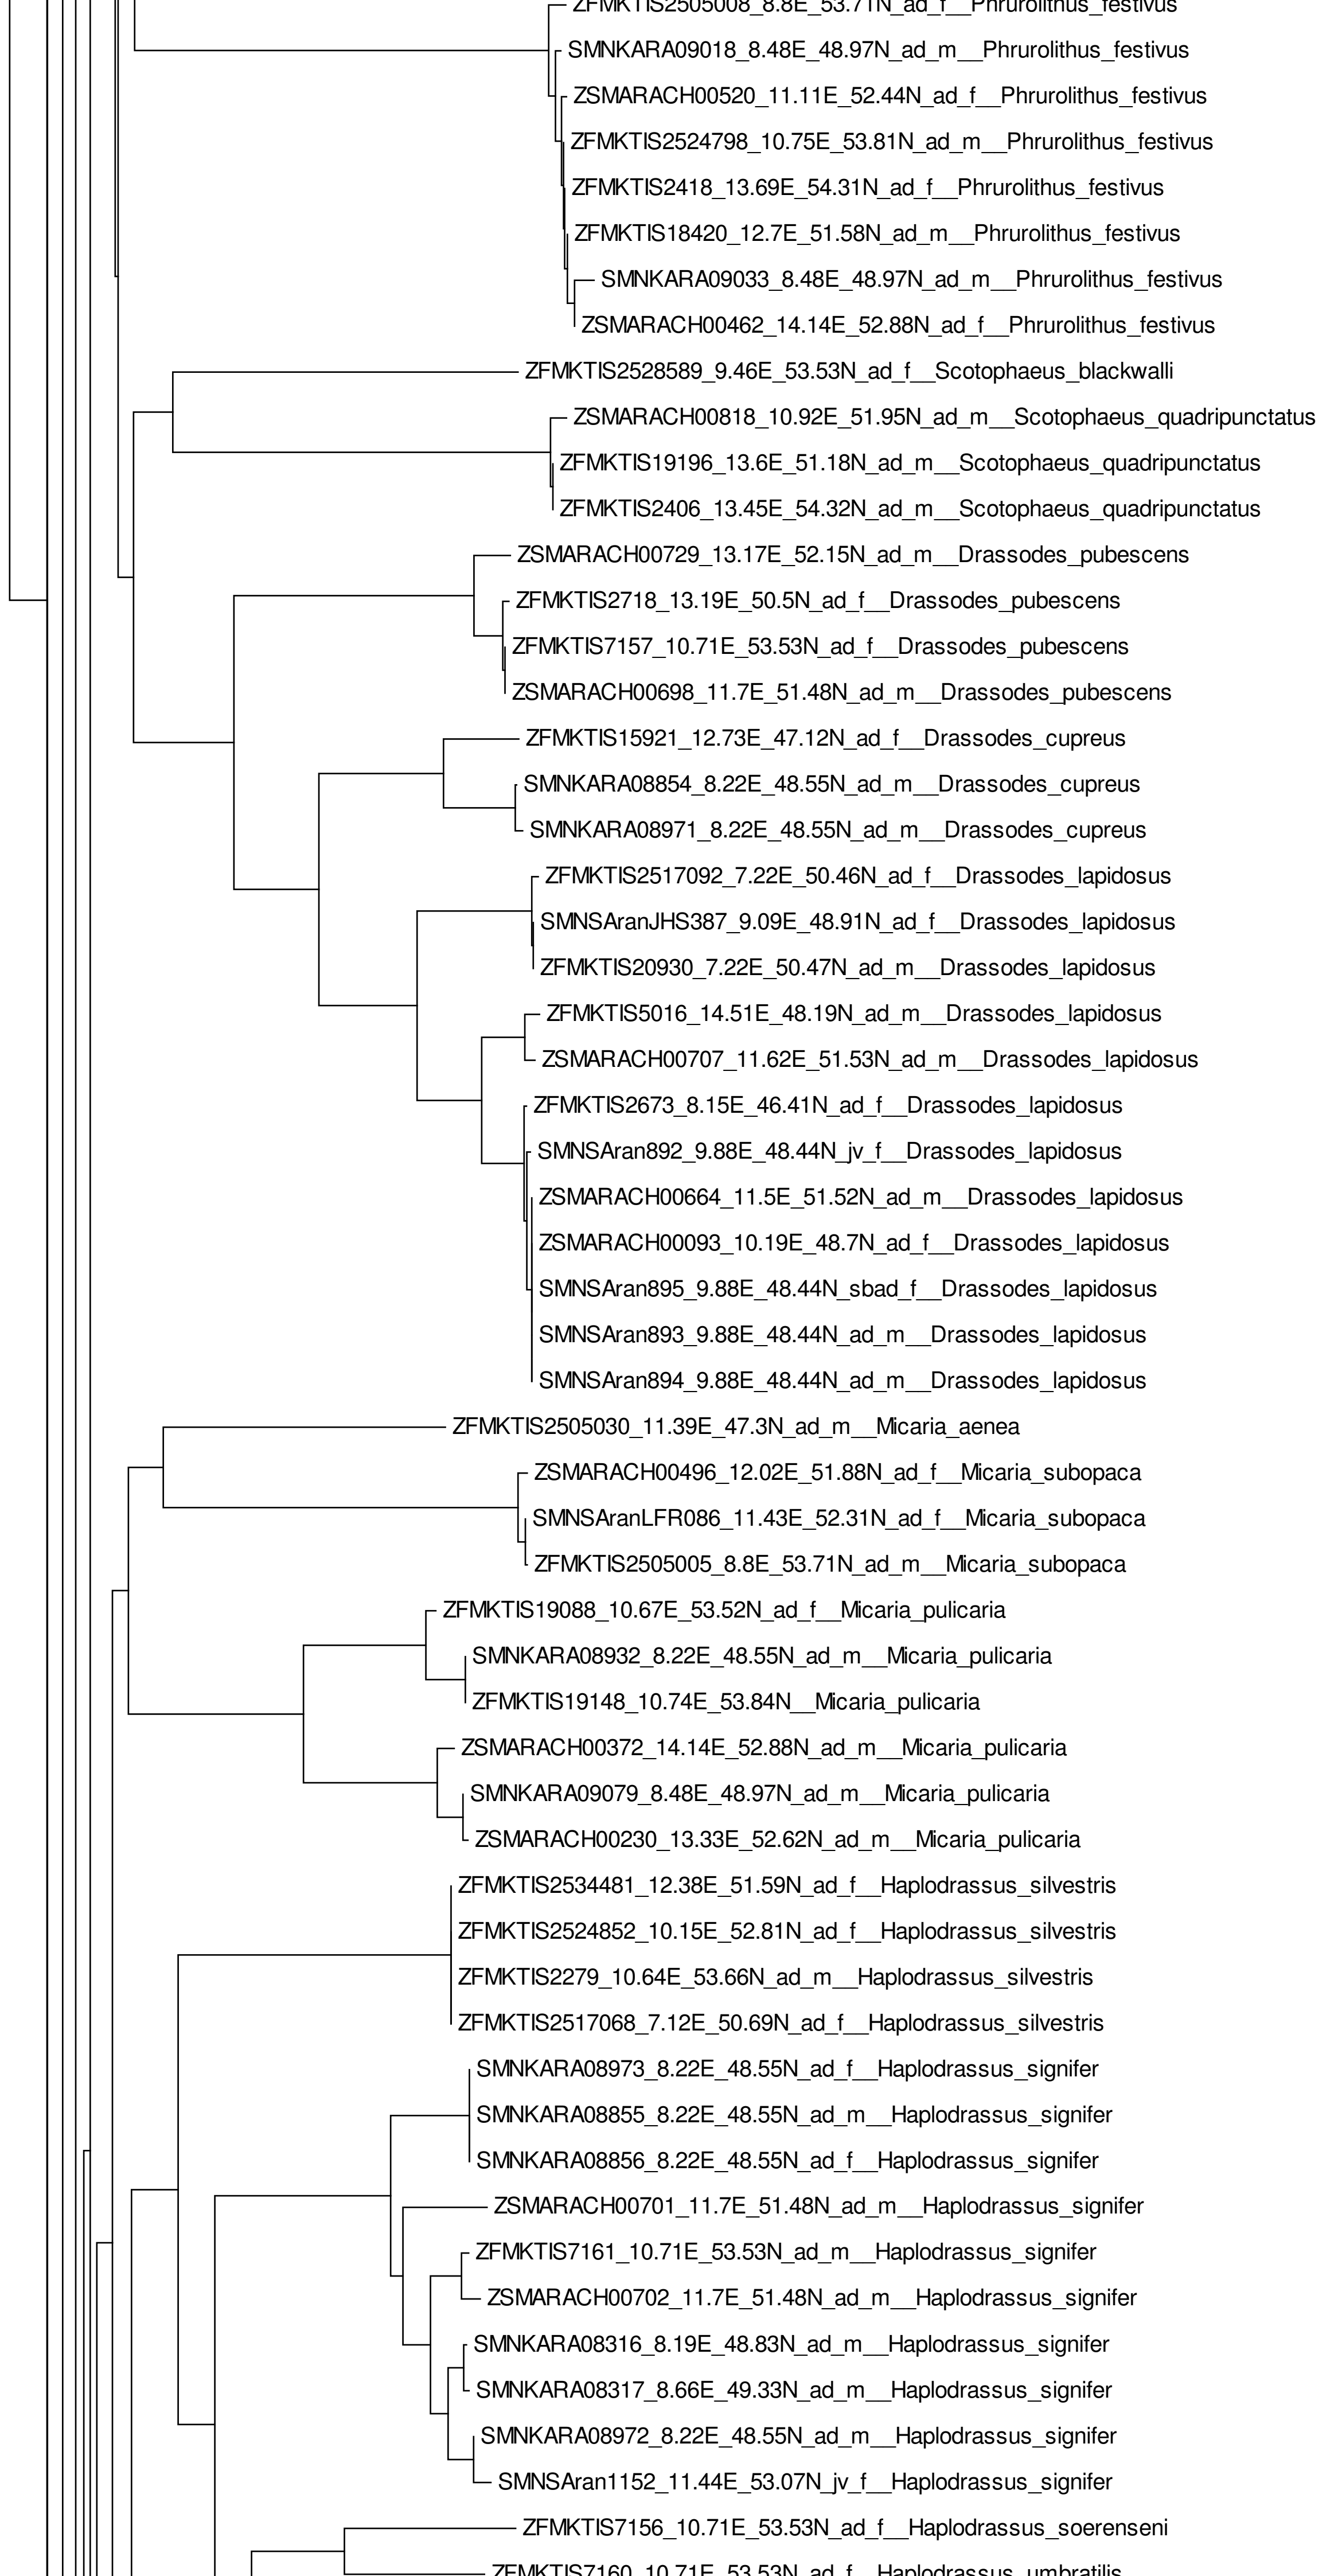

0.02



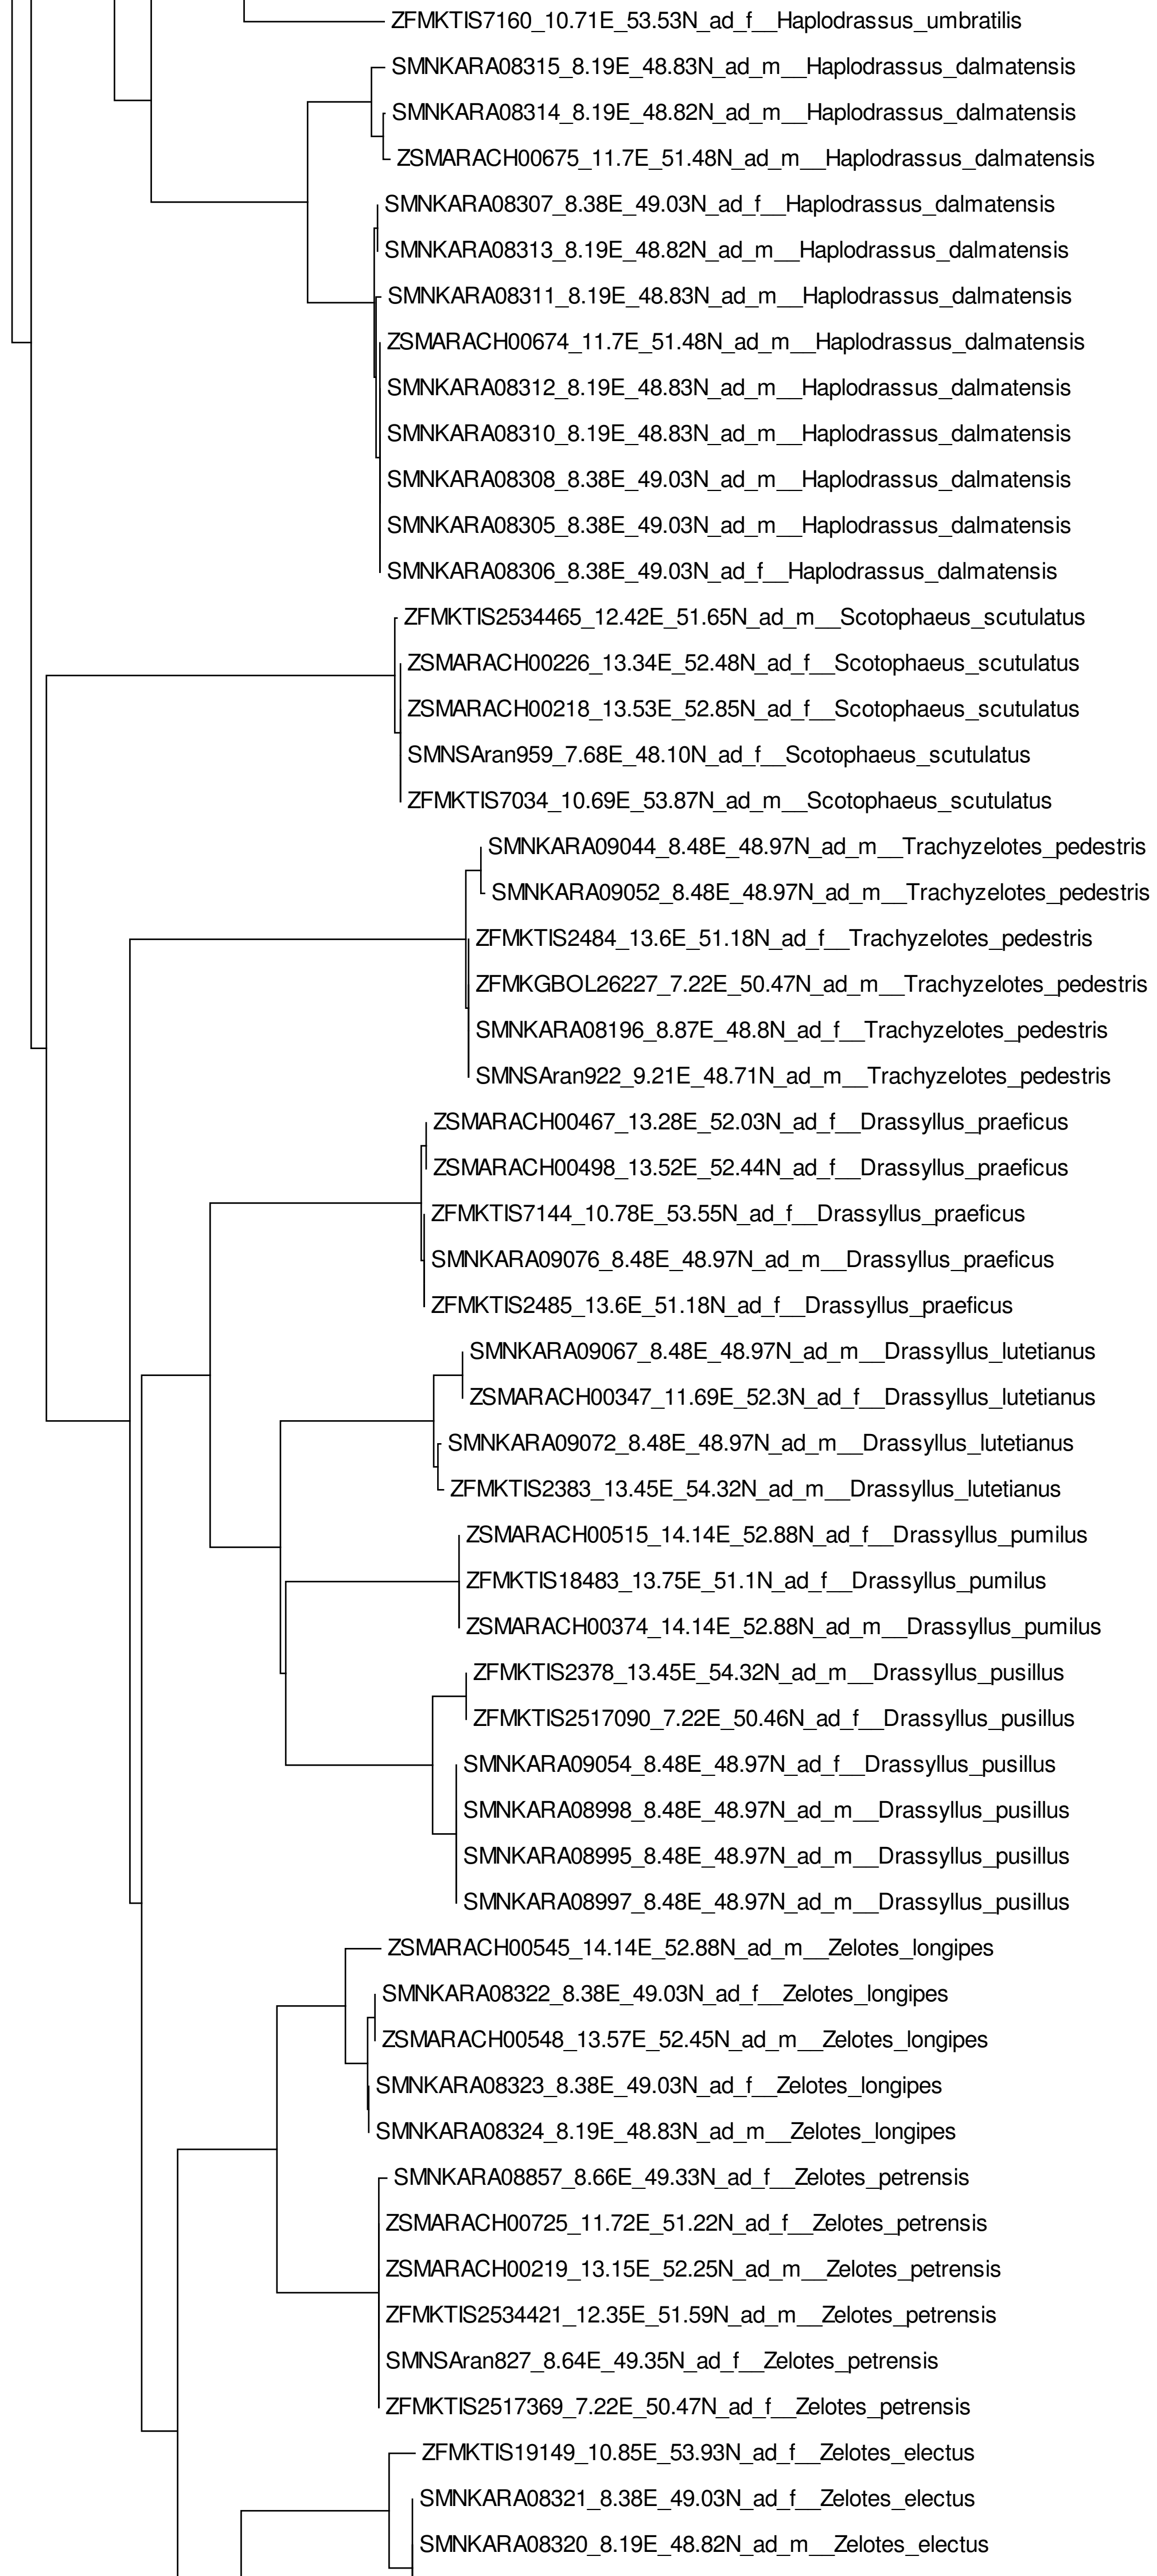

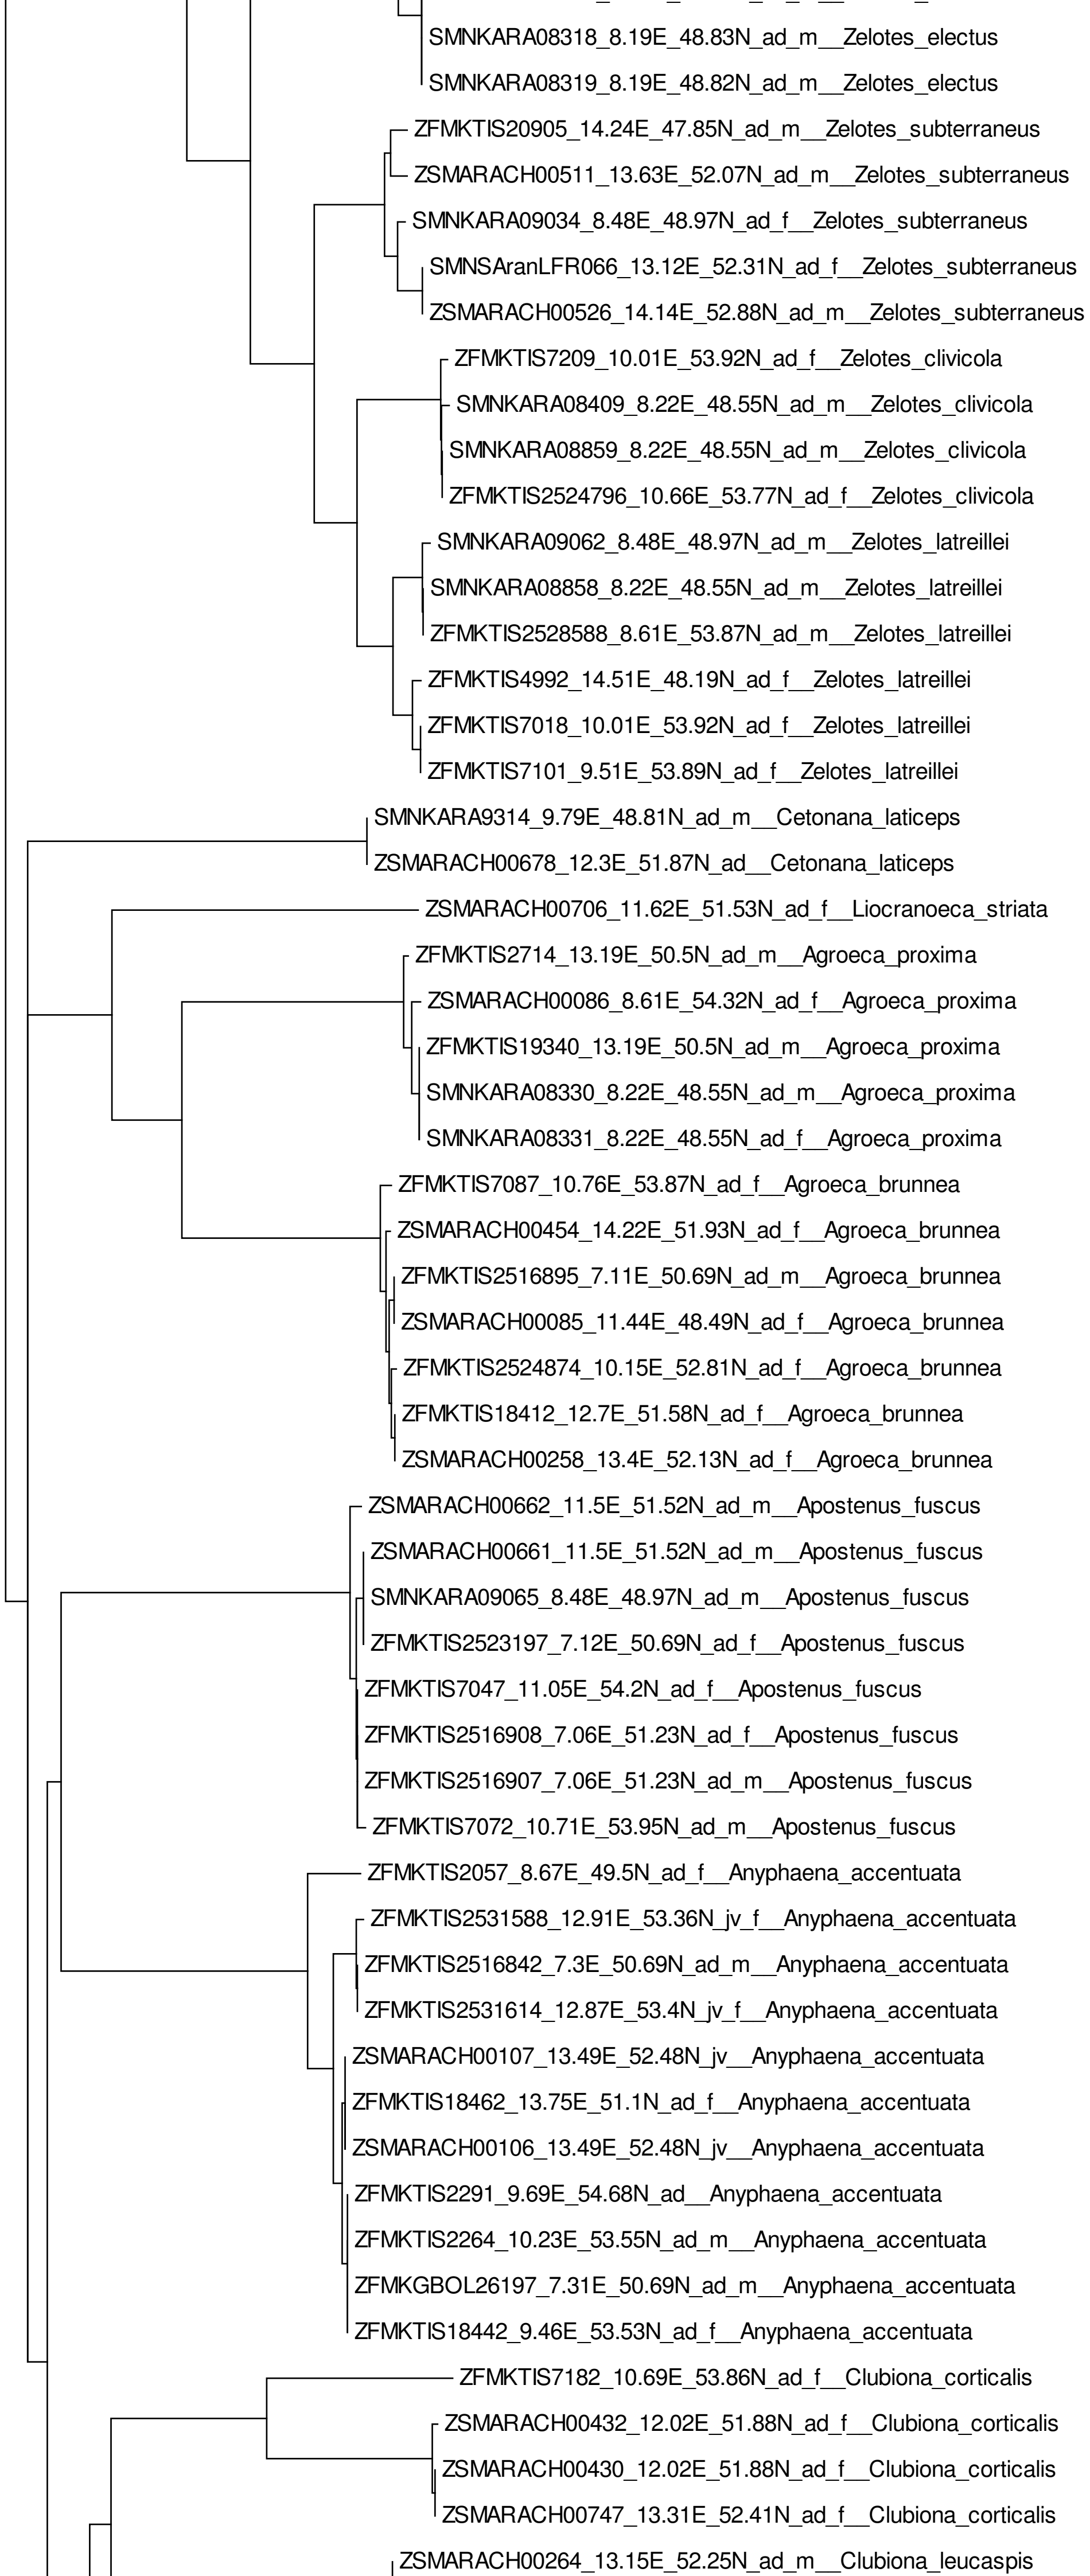



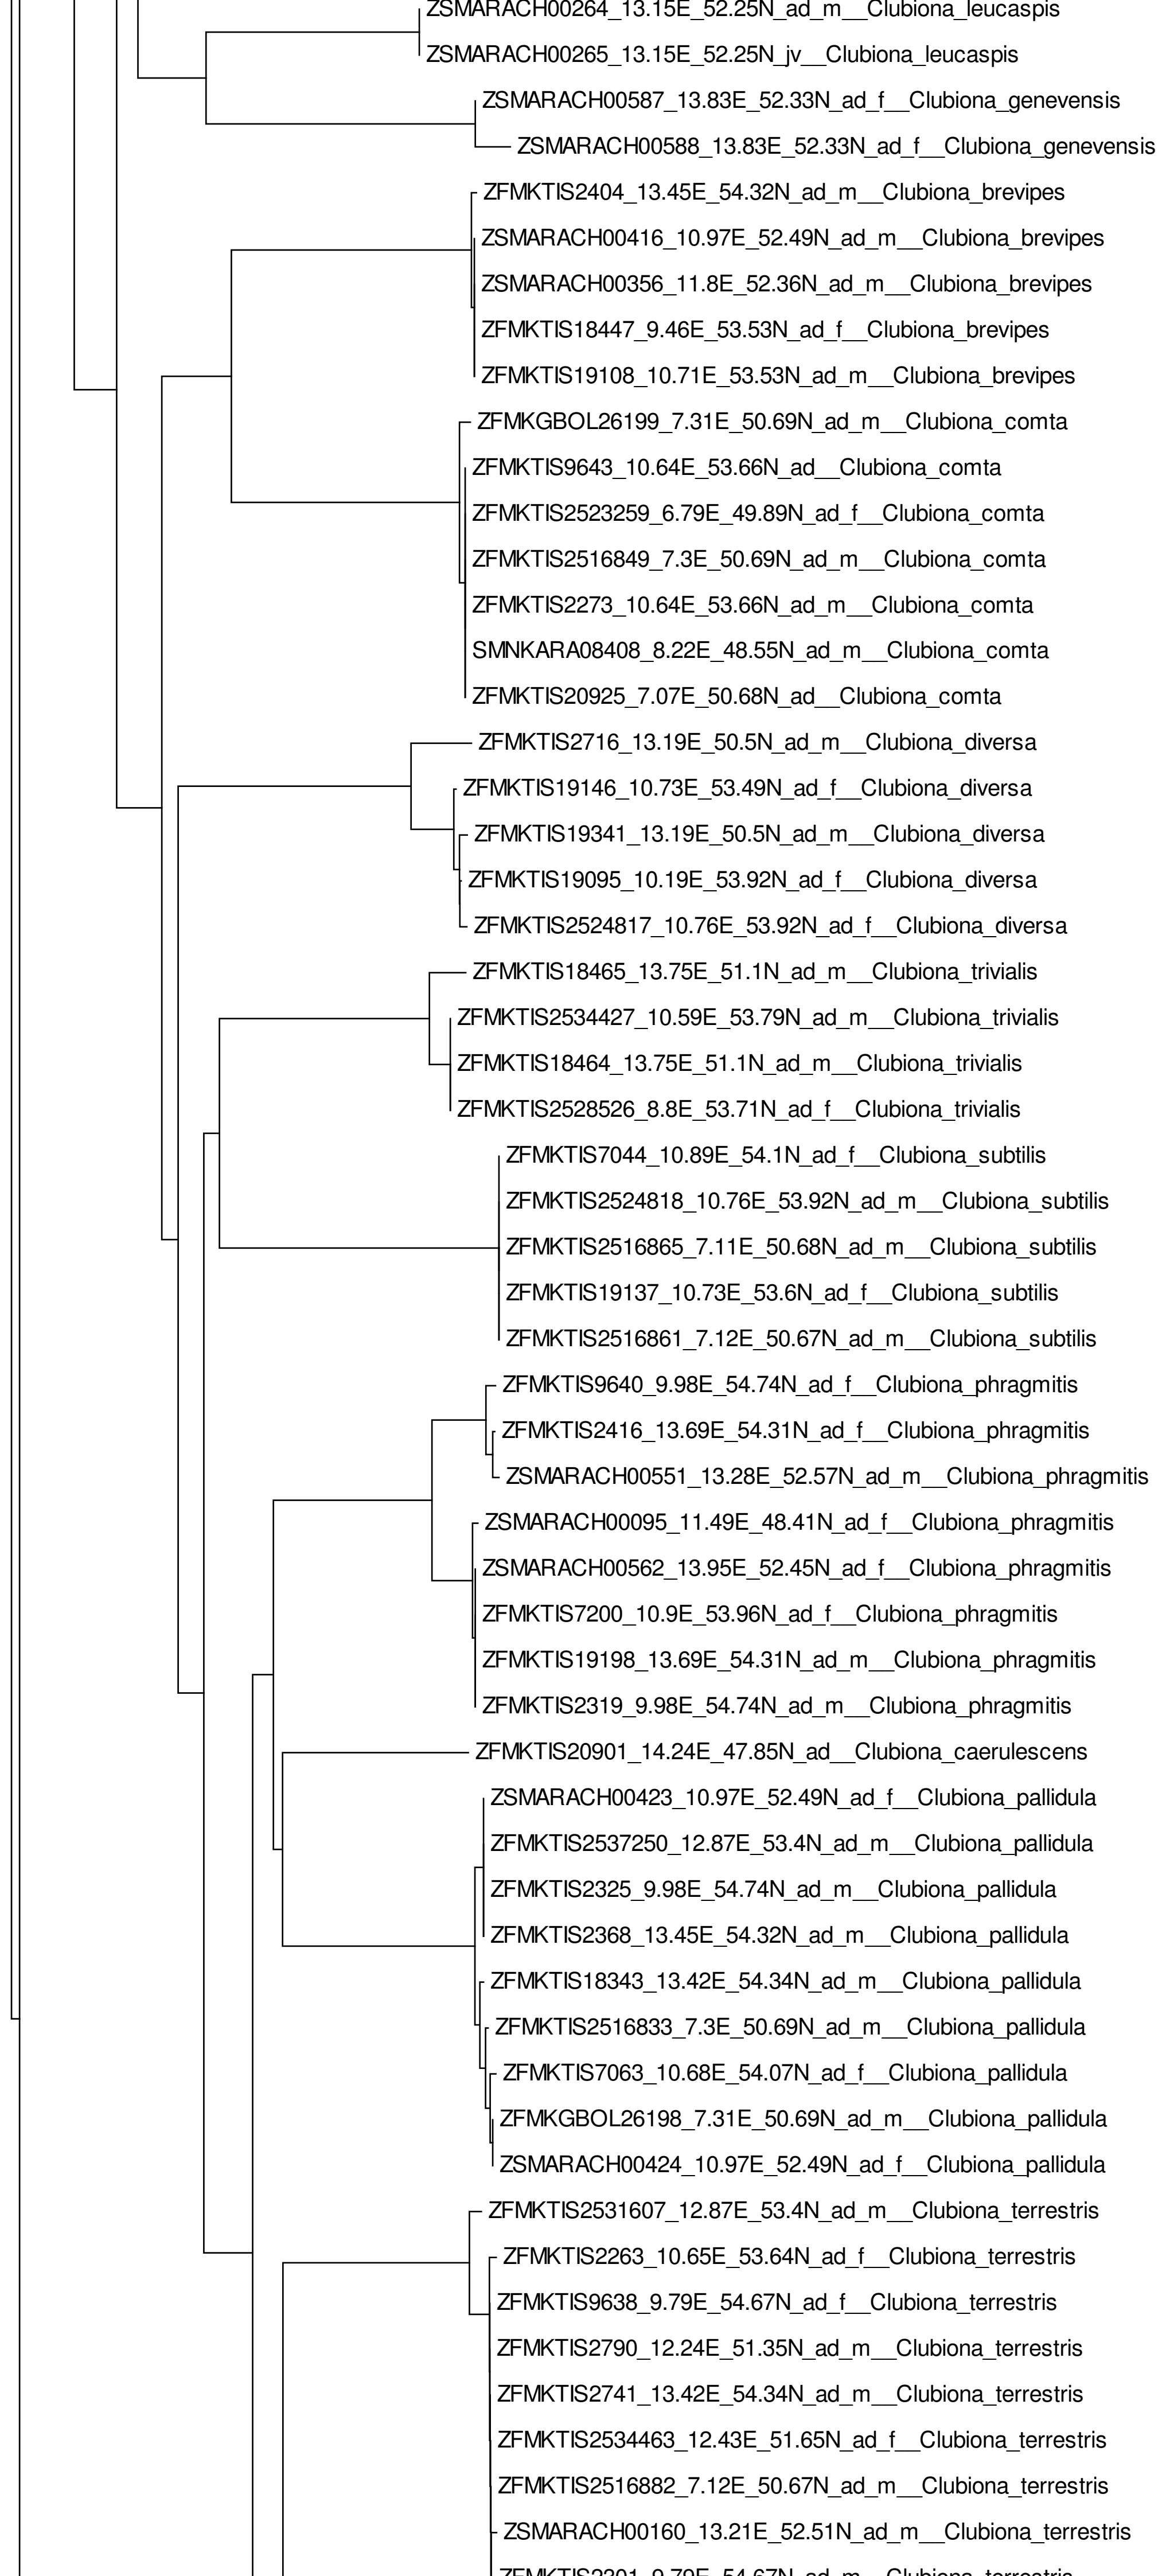

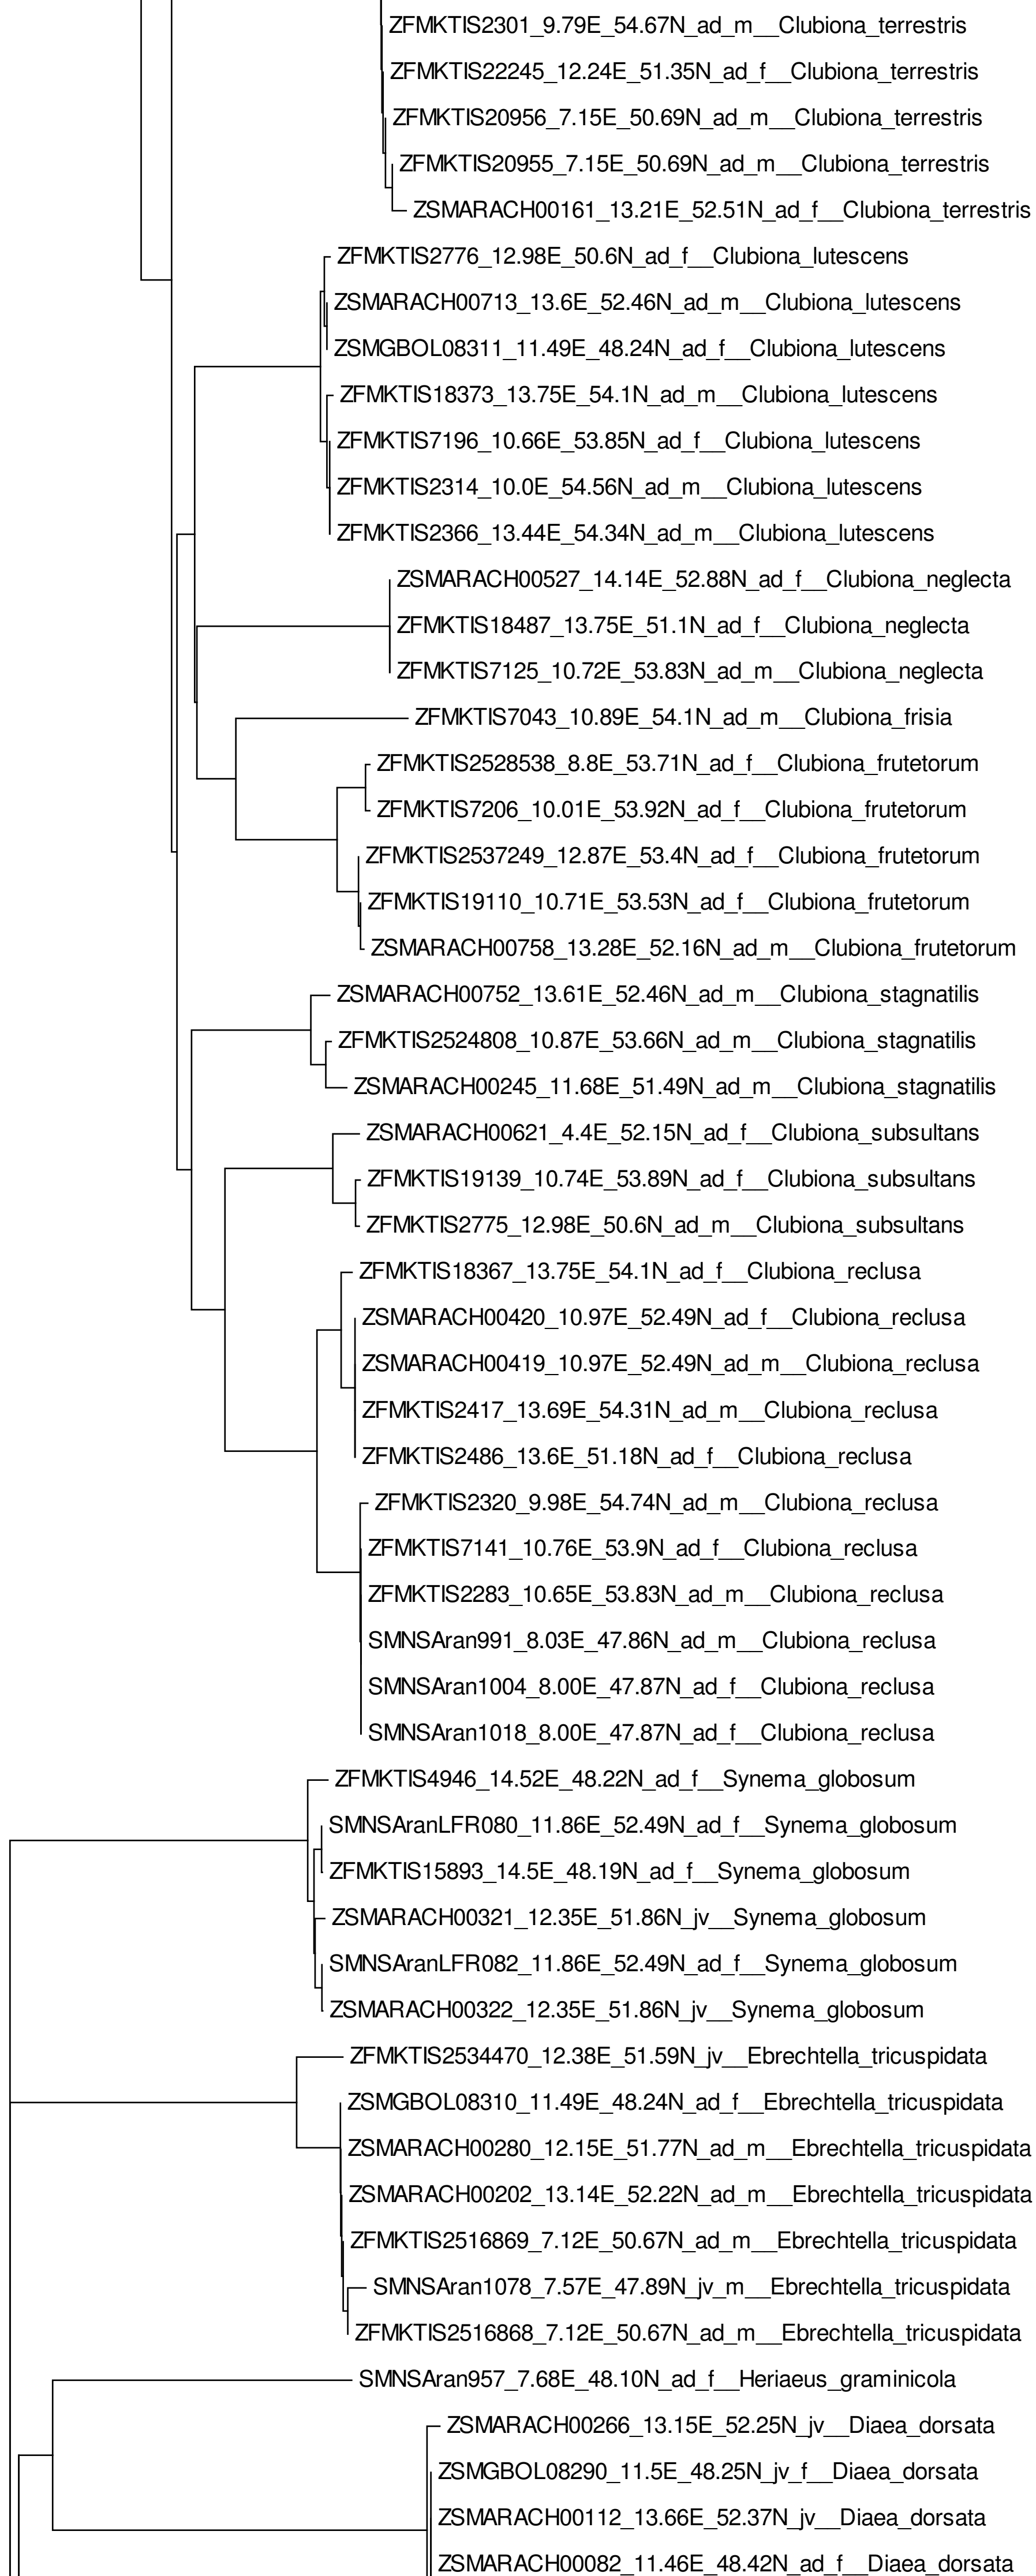



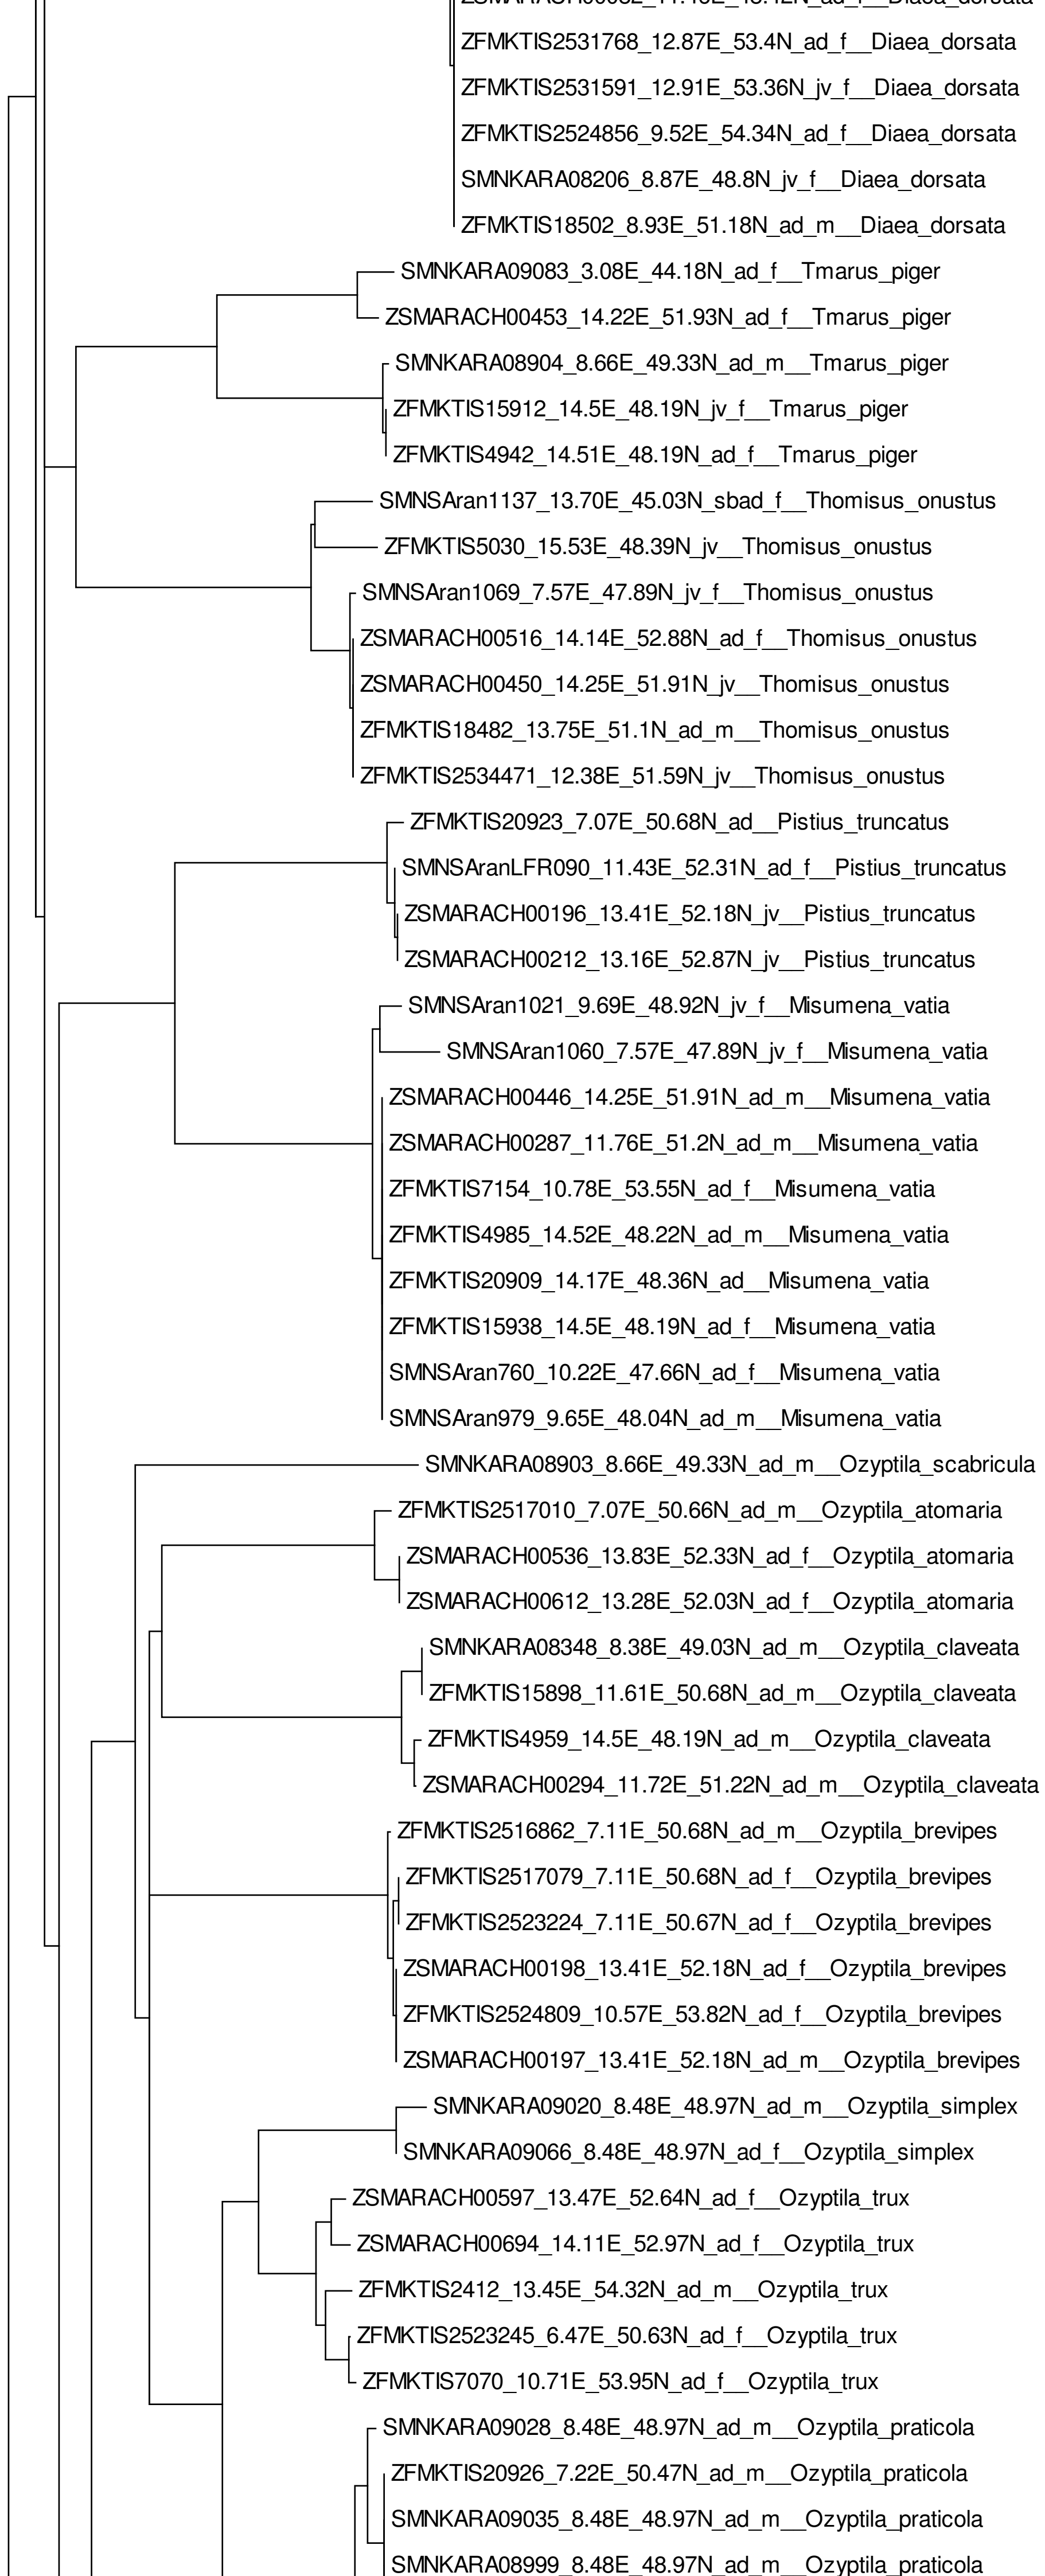

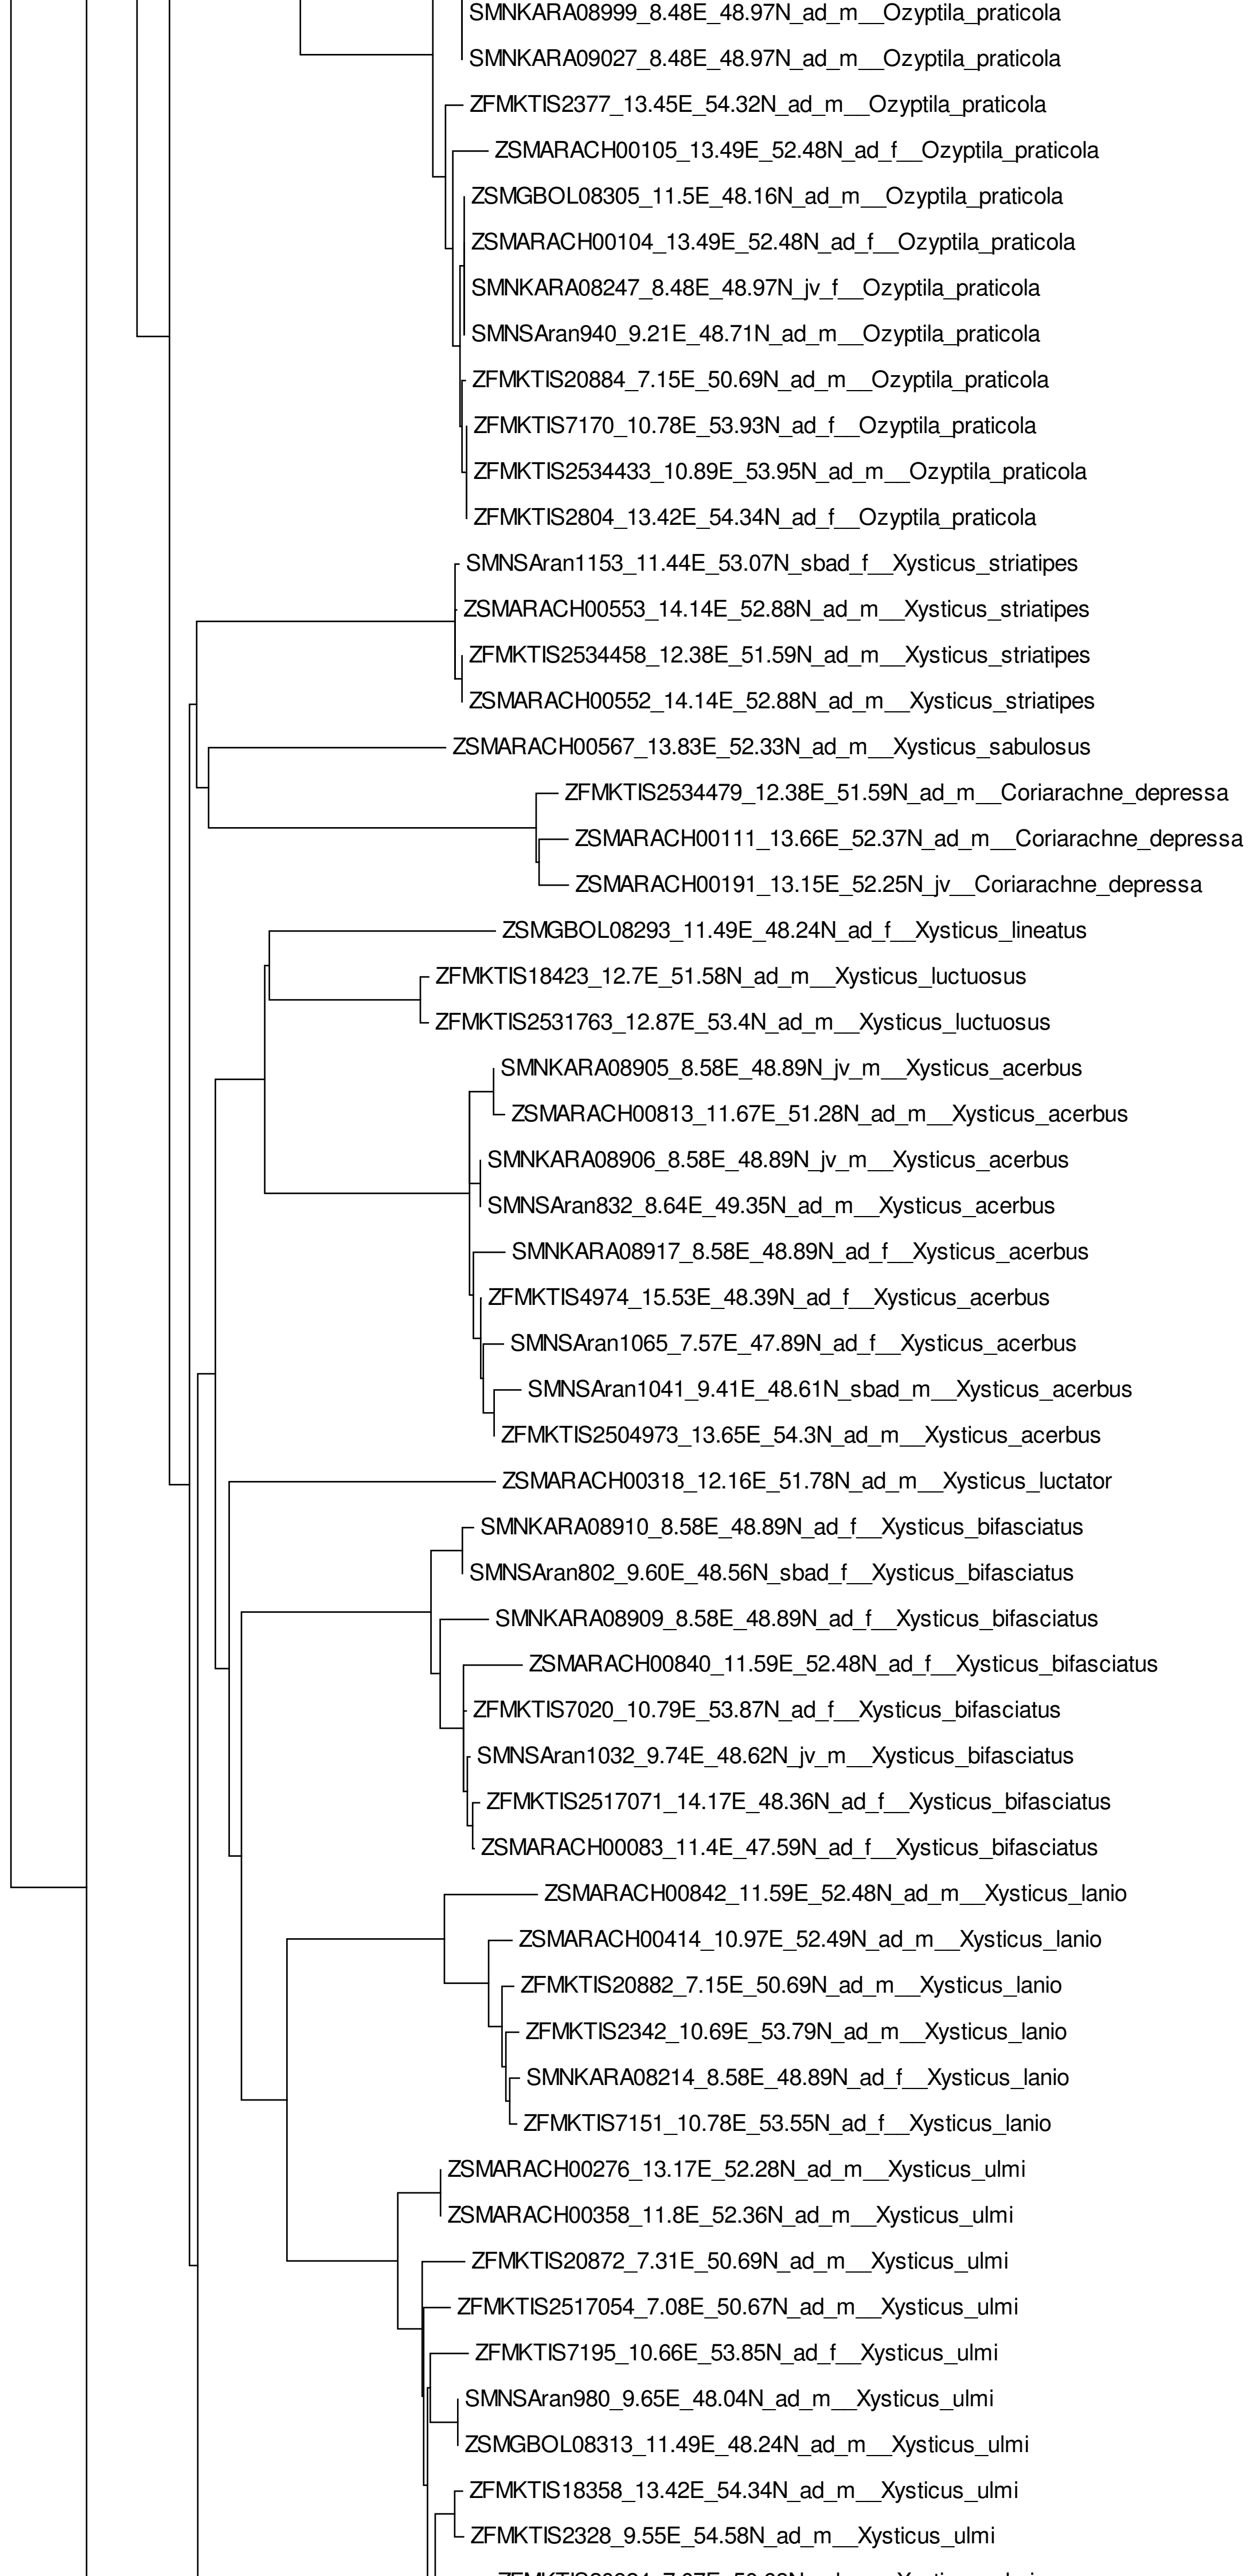

0.02



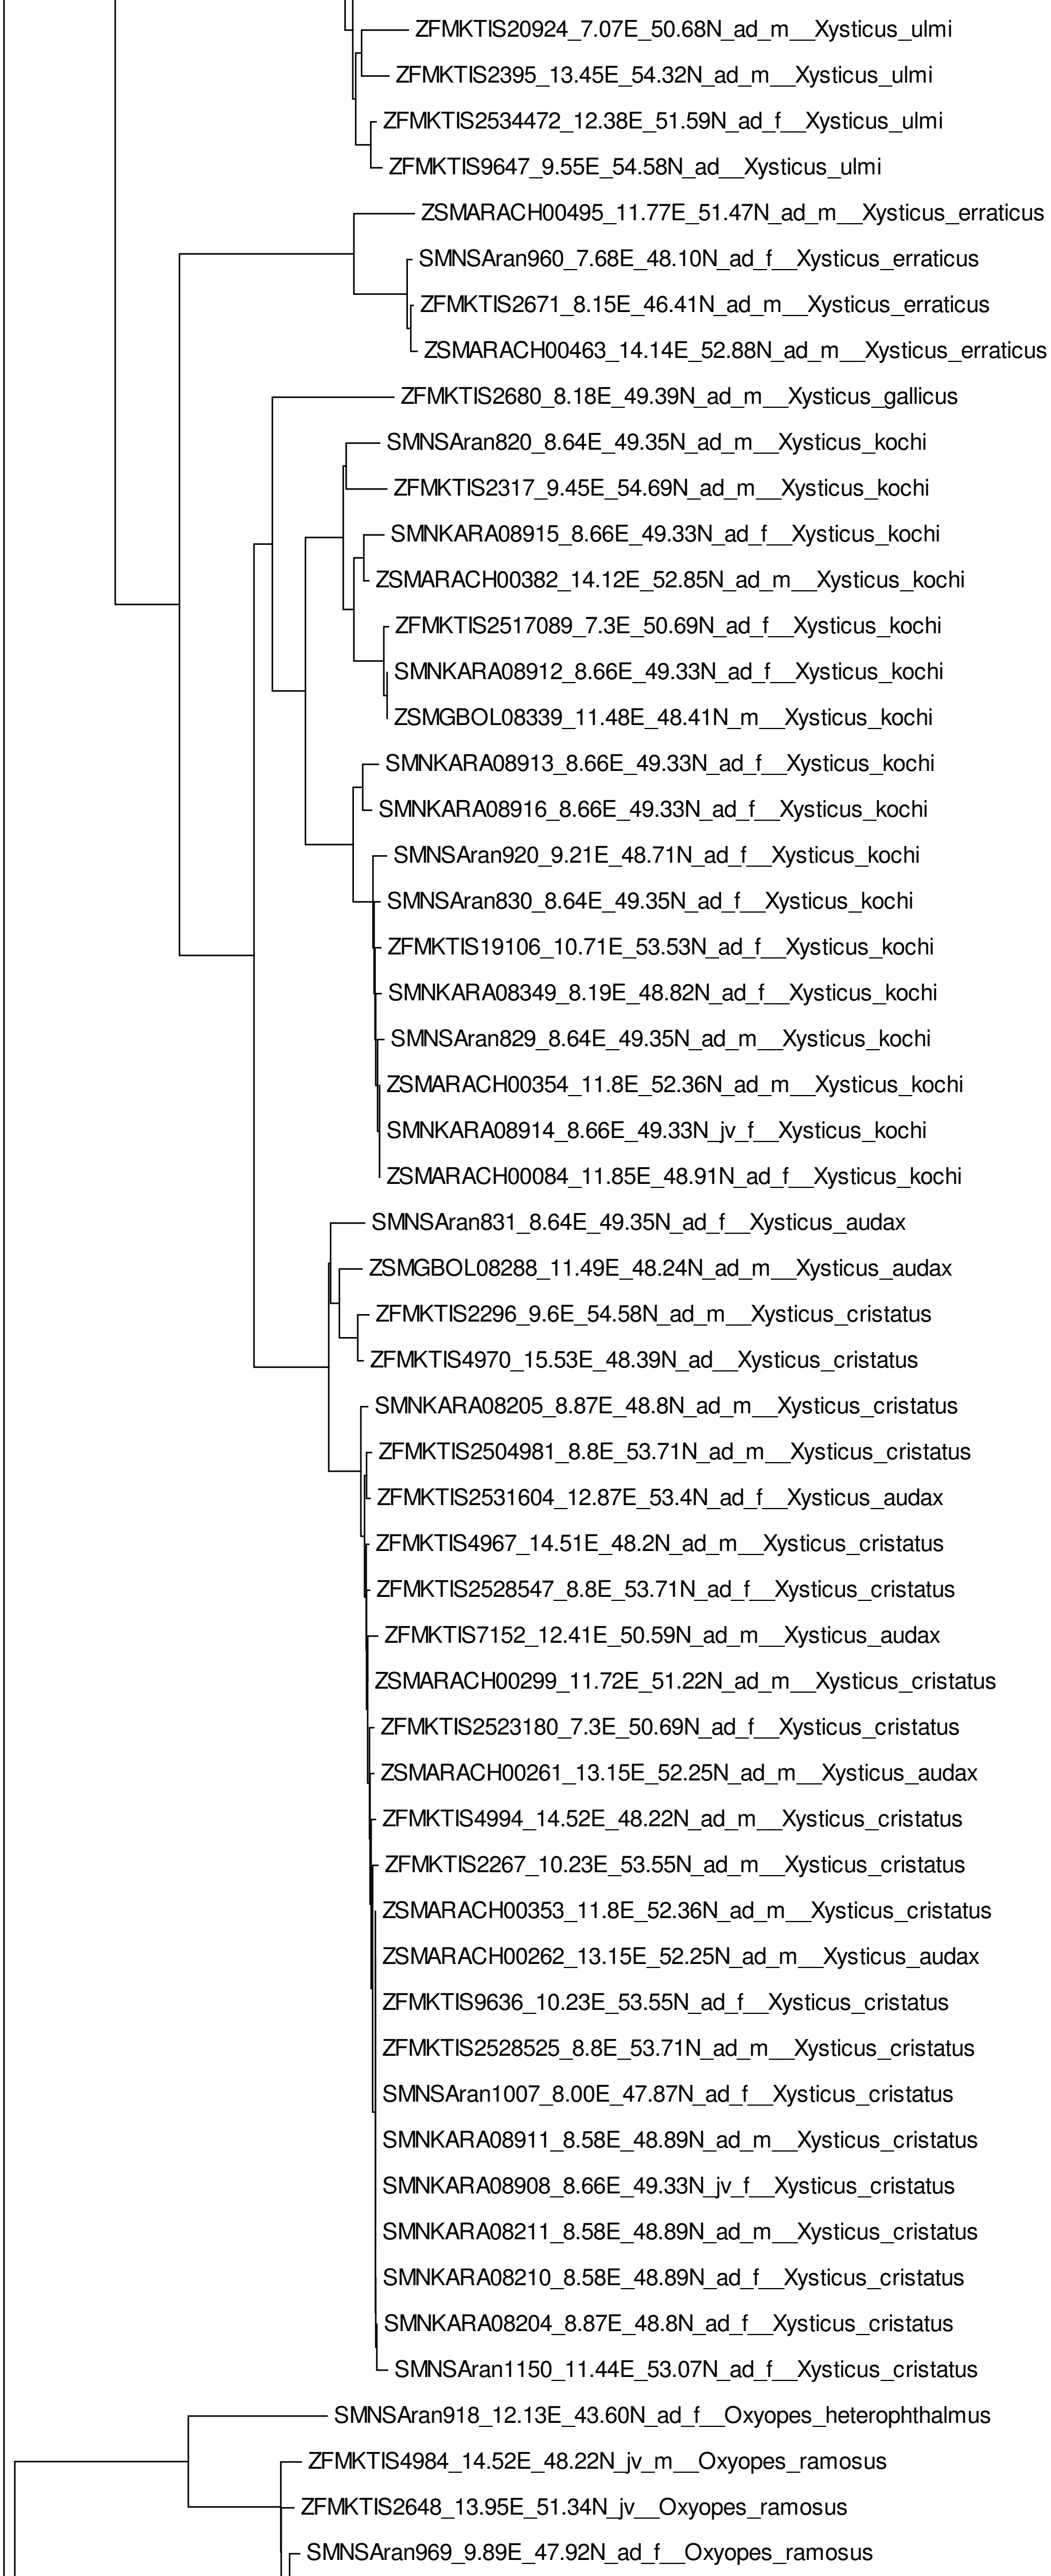

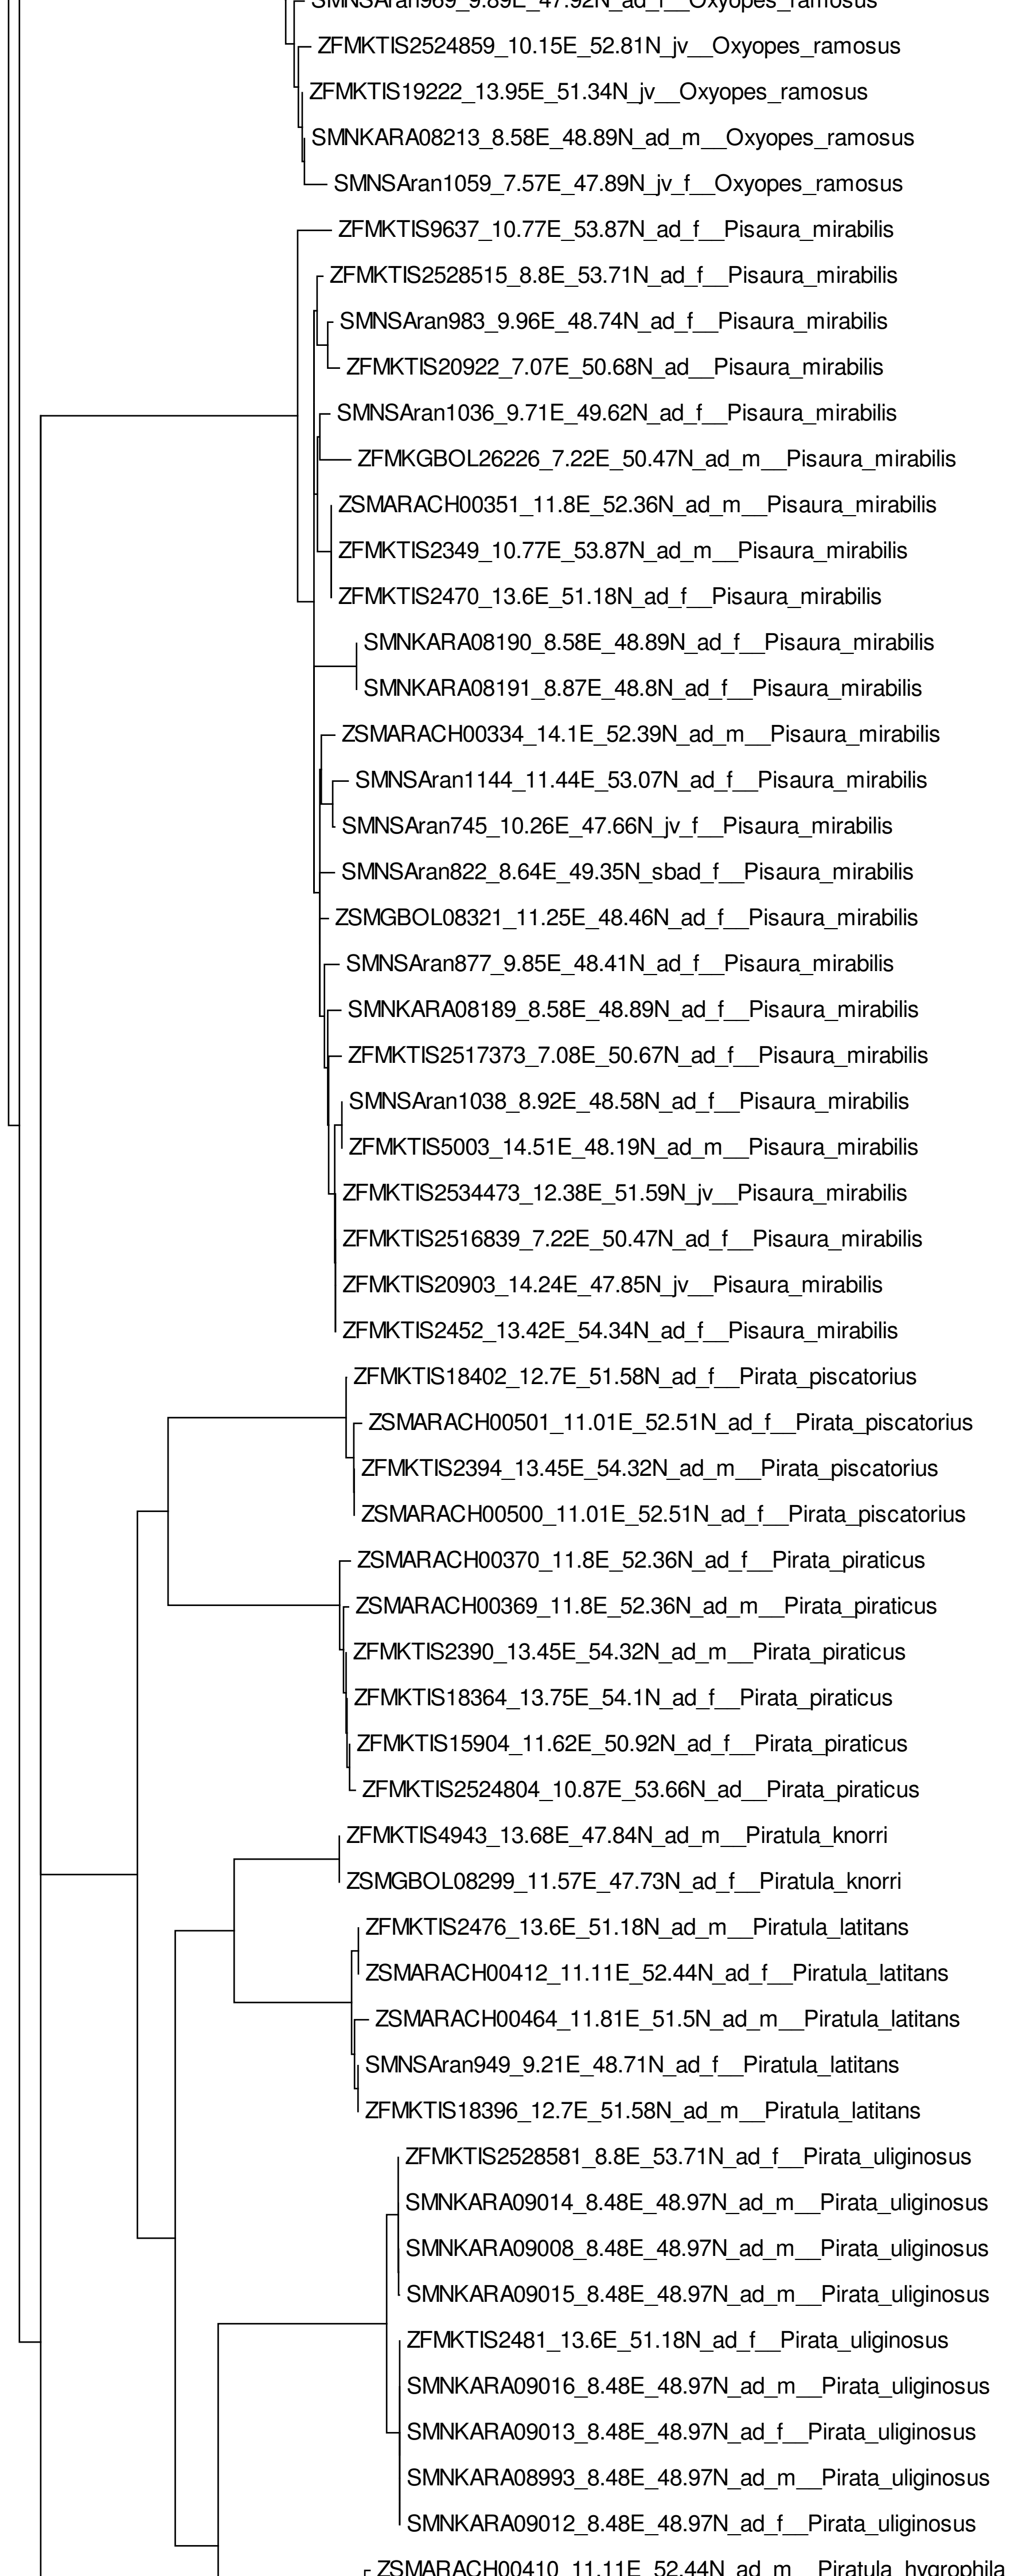

0.02



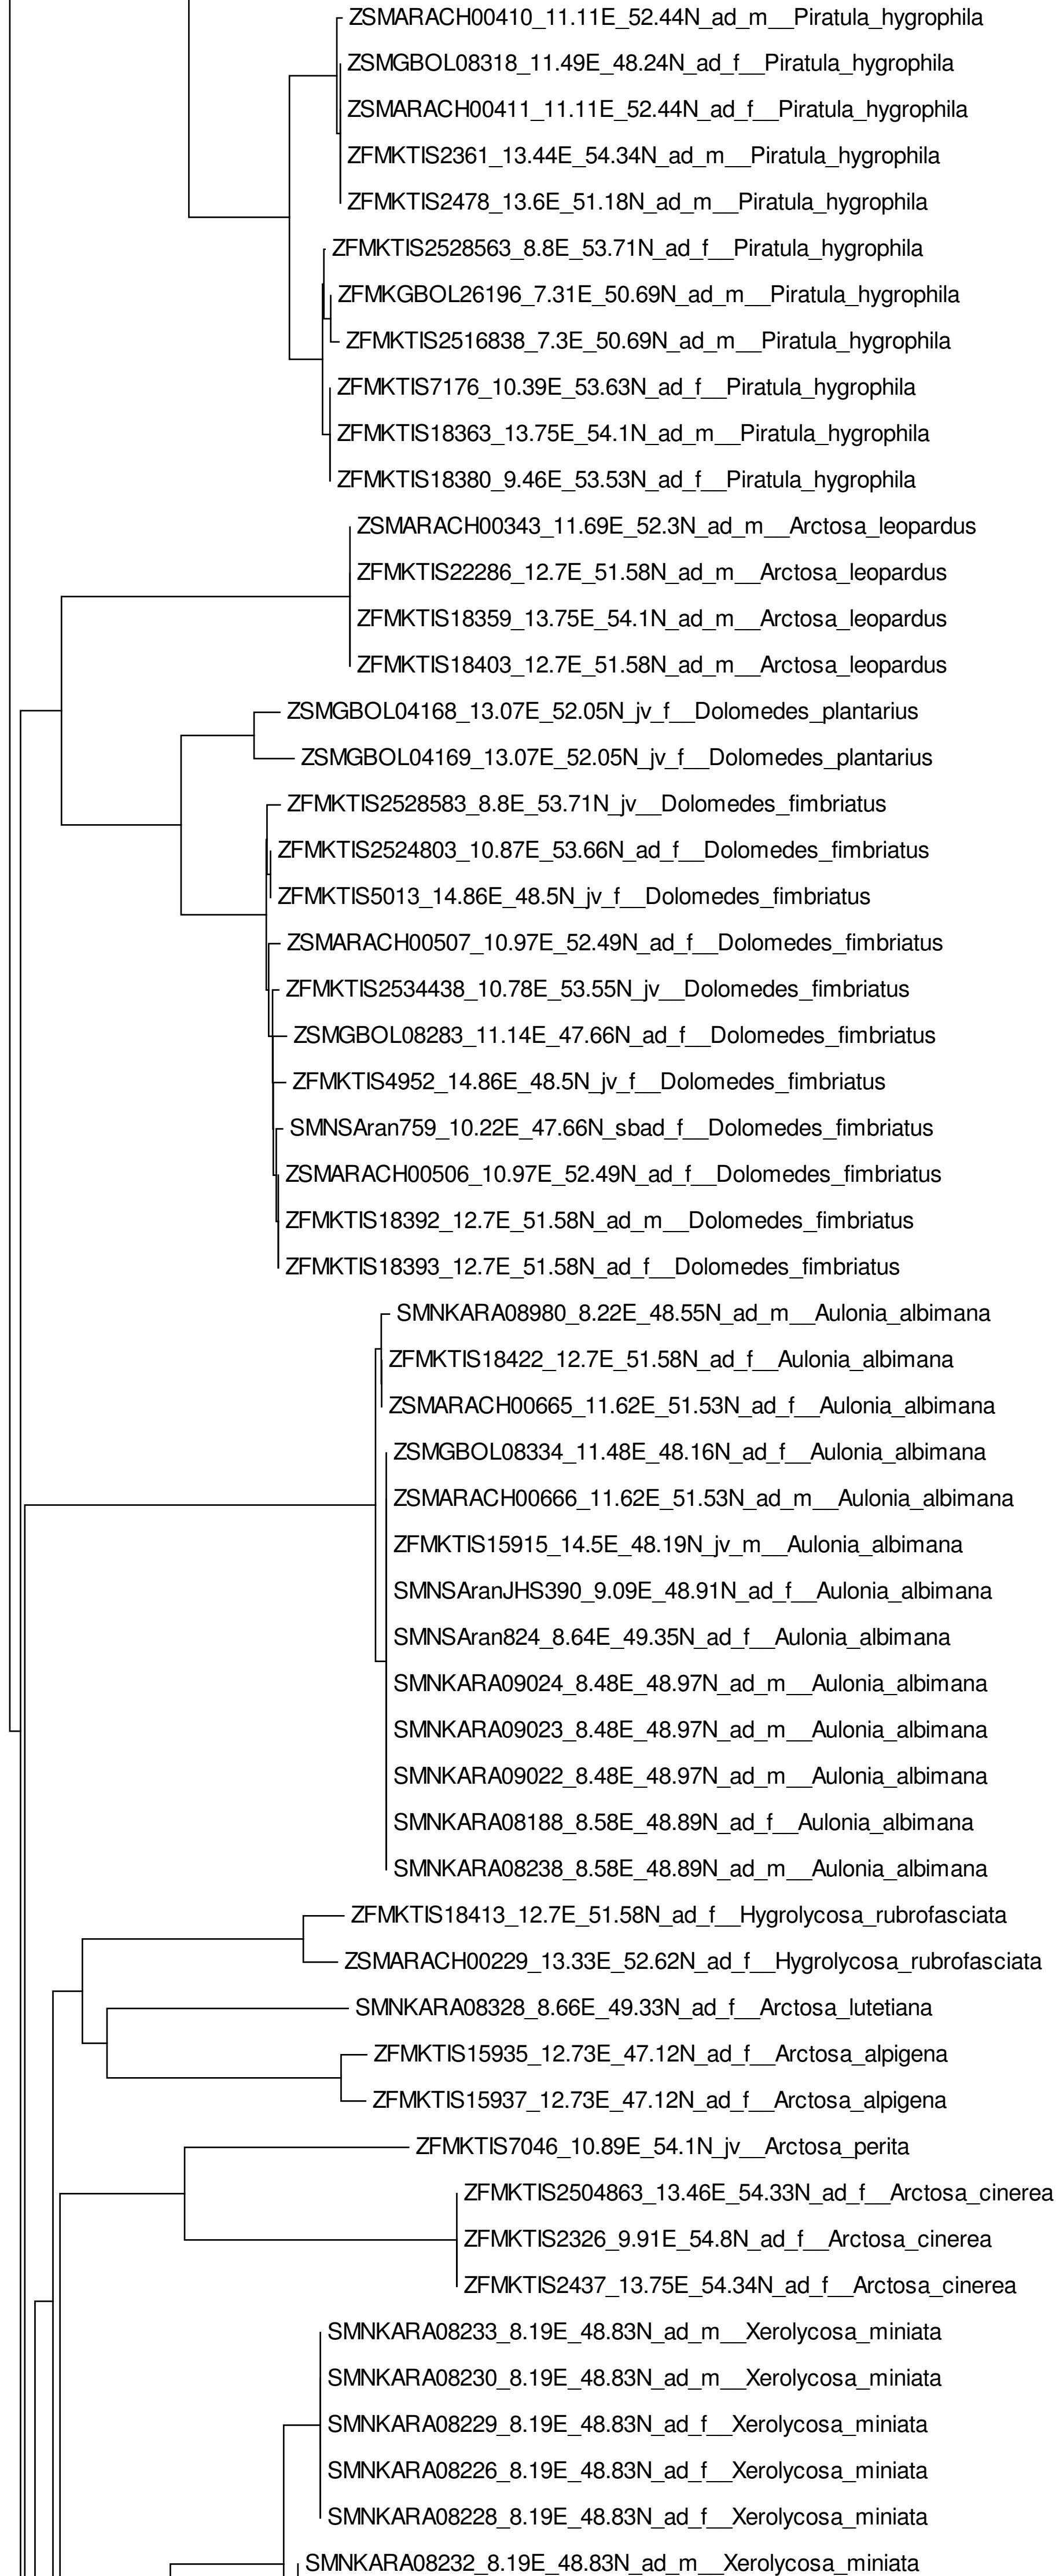

SMNKARA08227\_8.19E\_48.83N\_ad\_f\_\_Xerolycosa\_miniata  
 SMNKARA08231\_8.19E\_48.83N\_ad\_m\_\_Xerolycosa\_miniata  
 ZSMARACH00494\_11.77E\_51.47N\_ad\_f\_\_Xerolycosa\_miniata  
 ZSMARACH00493\_11.77E\_51.47N\_ad\_m\_\_Xerolycosa\_miniata  
 ZFMKTIS2524830\_10.75E\_53.81N\_ad\_f\_\_Xerolycosa\_miniata  
 ZFMKTIS18474\_13.75E\_51.1N\_ad\_m\_\_Xerolycosa\_miniata  
 ZFMKTIS2449\_13.42E\_54.34N\_ad\_m\_\_Xerolycosa\_miniata  
 ZFMKTIS2523211\_7.22E\_50.46N\_ad\_f\_\_Xerolycosa\_nemoralis  
 ZFMKTIS18511\_8.93E\_51.18N\_ad\_m\_\_Xerolycosa\_nemoralis  
 ZFMKTIS18510\_8.93E\_51.18N\_ad\_m\_\_Xerolycosa\_nemoralis  
 SMNSAran889\_9.84E\_48.45N\_sbad\_f\_\_Xerolycosa\_nemoralis  
 SMNSAran888\_9.84E\_48.45N\_sbad\_m\_\_Xerolycosa\_nemoralis  
 SMNSAran752\_10.26E\_47.66N\_ad\_f\_\_Xerolycosa\_nemoralis  
 SMNKARA08985\_8.22E\_48.55N\_ad\_m\_\_Xerolycosa\_nemoralis  
 SMNKARA08984\_8.22E\_48.55N\_ad\_f\_\_Xerolycosa\_nemoralis  
 SMNKARA08982\_8.22E\_48.55N\_ad\_f\_\_Xerolycosa\_nemoralis  
 SMNKARA08336\_8.22E\_48.55N\_ad\_m\_\_Xerolycosa\_nemoralis  
 SMNKARA08335\_8.22E\_48.55N\_ad\_m\_\_Xerolycosa\_nemoralis  
 SMNKARA08334\_8.22E\_48.55N\_ad\_f\_\_Xerolycosa\_nemoralis  
 SMNKARA08332\_8.22E\_48.55N\_ad\_f\_\_Xerolycosa\_nemoralis  
 SMNKARA08333\_8.22E\_48.55N\_ad\_m\_\_Xerolycosa\_nemoralis  
 SMNKARA08983\_8.22E\_48.55N\_ad\_m\_\_Xerolycosa\_nemoralis  
 ZSMGBOL08324\_11.46E\_48.42N\_ad\_m\_\_Xerolycosa\_nemoralis  
 ZSMARACH00719\_13.4E\_52.14N\_ad\_f\_\_Xerolycosa\_nemoralis  
 ZSMARACH00718\_13.4E\_52.14N\_ad\_m\_\_Xerolycosa\_nemoralis  
 ZFMKTIS5022\_15.53E\_48.39N\_ad\_f\_\_Xerolycosa\_nemoralis  
 ZFMKTIS5020\_13.16E\_47.12N\_ad\_f\_\_Xerolycosa\_nemoralis  
 ZFMKTIS2640\_13.95E\_51.34N\_ad\_f\_\_Xerolycosa\_nemoralis  
 ZFMKTIS2534437\_10.78E\_53.55N\_ad\_m\_\_Xerolycosa\_nemoralis  
 ZFMKTIS2531767\_12.87E\_53.4N\_ad\_m\_\_Xerolycosa\_nemoralis  
 ZFMKTIS2531766\_12.87E\_53.4N\_ad\_m\_\_Xerolycosa\_nemoralis  
 ZFMKTIS2524853\_9.52E\_54.34N\_ad\_m\_\_Xerolycosa\_nemoralis  
 ZFMKTIS20977\_14.31E\_47.92N\_ad\_m\_\_Xerolycosa\_nemoralis  
 ZFMKTIS20976\_14.31E\_47.92N\_ad\_\_Xerolycosa\_nemoralis  
 SMNKARA08897\_8.66E\_49.33N\_ad\_f\_\_Xerolycosa\_nemoralis  
 ZFMKTIS19219\_13.95E\_51.34N\_ad\_m\_\_Xerolycosa\_nemoralis  
 SMNKARA09078\_8.48E\_48.97N\_ad\_m\_\_Trochosa\_ruricola  
 ZSMGBOL08329\_11.49E\_47.56N\_ad\_m\_\_Trochosa\_ruricola  
 ZFMKTIS2391\_13.45E\_54.32N\_ad\_m\_\_Trochosa\_ruricola  
 ZSMARACH00491\_11.77E\_51.47N\_ad\_m\_\_Trochosa\_ruricola  
 SMNKARA08402\_8.22E\_48.55N\_ad\_m\_\_Trochosa\_spinipalpis  
 ZFMKTIS19335\_13.19E\_50.5N\_ad\_m\_\_Trochosa\_spinipalpis  
 ZSMARACH00228\_13.33E\_52.62N\_ad\_m\_\_Trochosa\_spinipalpis  
 ZFMKTIS2392\_13.45E\_54.32N\_ad\_m\_\_Trochosa\_spinipalpis  
 ZSMARACH00194\_13.41E\_52.18N\_ad\_m\_\_Trochosa\_spinipalpis  
 ZSMARACH00624\_13.3E\_52.14N\_ad\_m\_\_Trochosa\_terricola  
 ZFMKTIS7080\_10.26E\_53.99N\_ad\_m\_\_Trochosa\_terricola  
 SMNKARA08399\_8.22E\_48.55N\_ad\_f\_\_Trochosa\_terricola  
 SMNKARA08220\_8.48E\_48.97N\_ad\_m\_\_Trochosa\_terricola  
 SMNKARA08221\_8.48E\_48.97N\_ad\_m\_\_Trochosa\_terricola  
 SMNKARA08394\_8.22E\_48.55N\_ad\_m\_\_Trochosa\_terricola  
 SMNKARA08395\_8.22E\_48.55N\_ad\_m\_\_Trochosa\_terricola  
 SMNKARA08403\_8.22E\_48.55N\_ad\_m\_\_Trochosa\_terricola  
 ZFMKTIS2505023\_11.39E\_47.31N\_ad\_f\_\_Trochosa\_terricola  
 SMNKARA08398\_8.22E\_48.55N\_ad\_m\_\_Trochosa\_terricola  
 ZSMARACH00623\_13.3E\_52.14N\_ad\_m\_\_Trochosa\_terricola



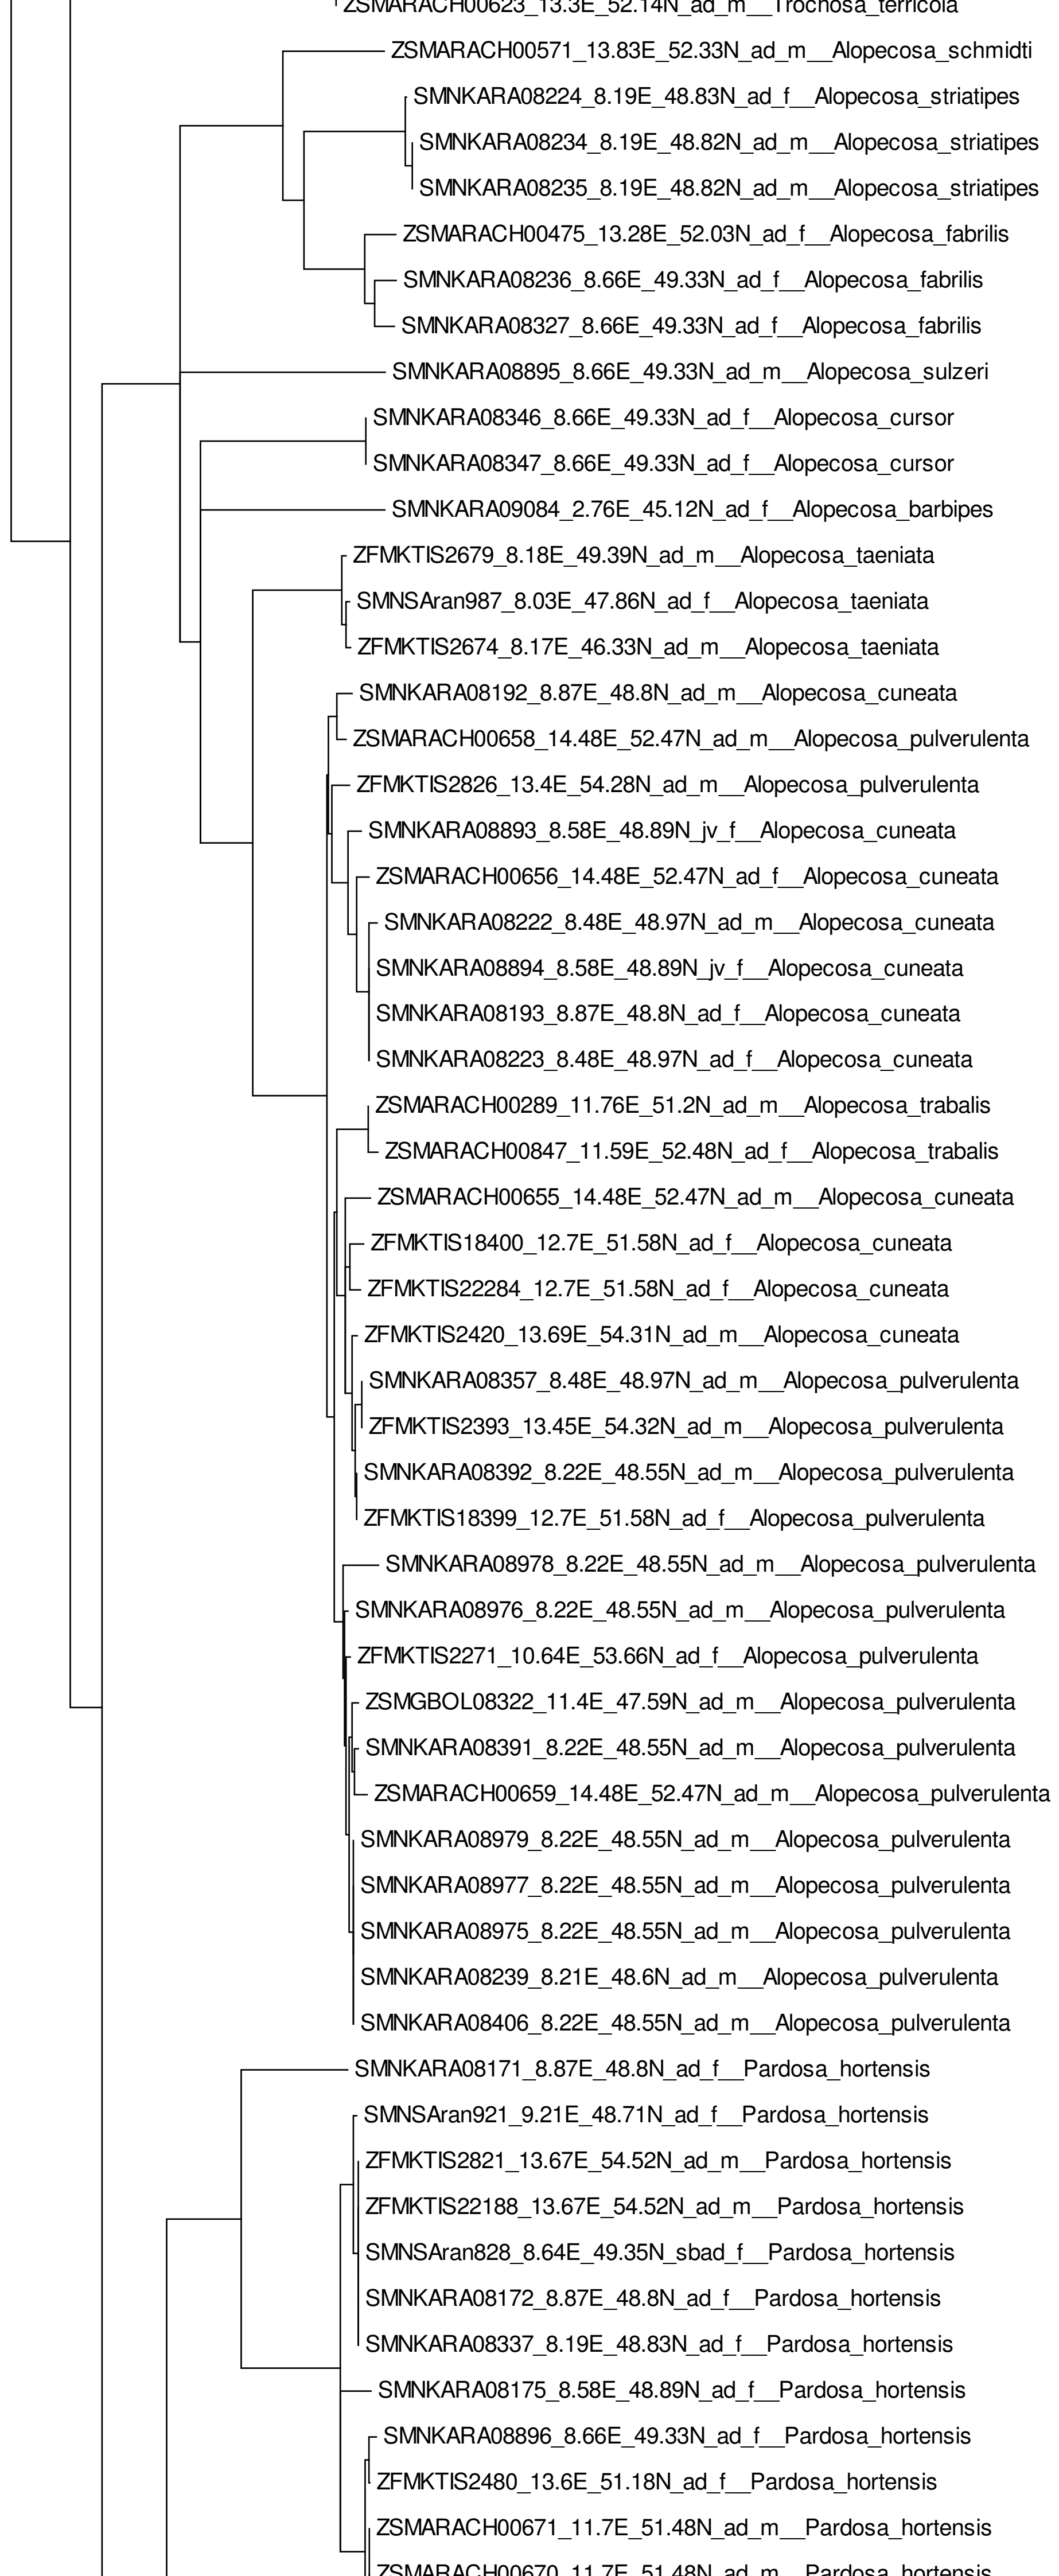

0.02

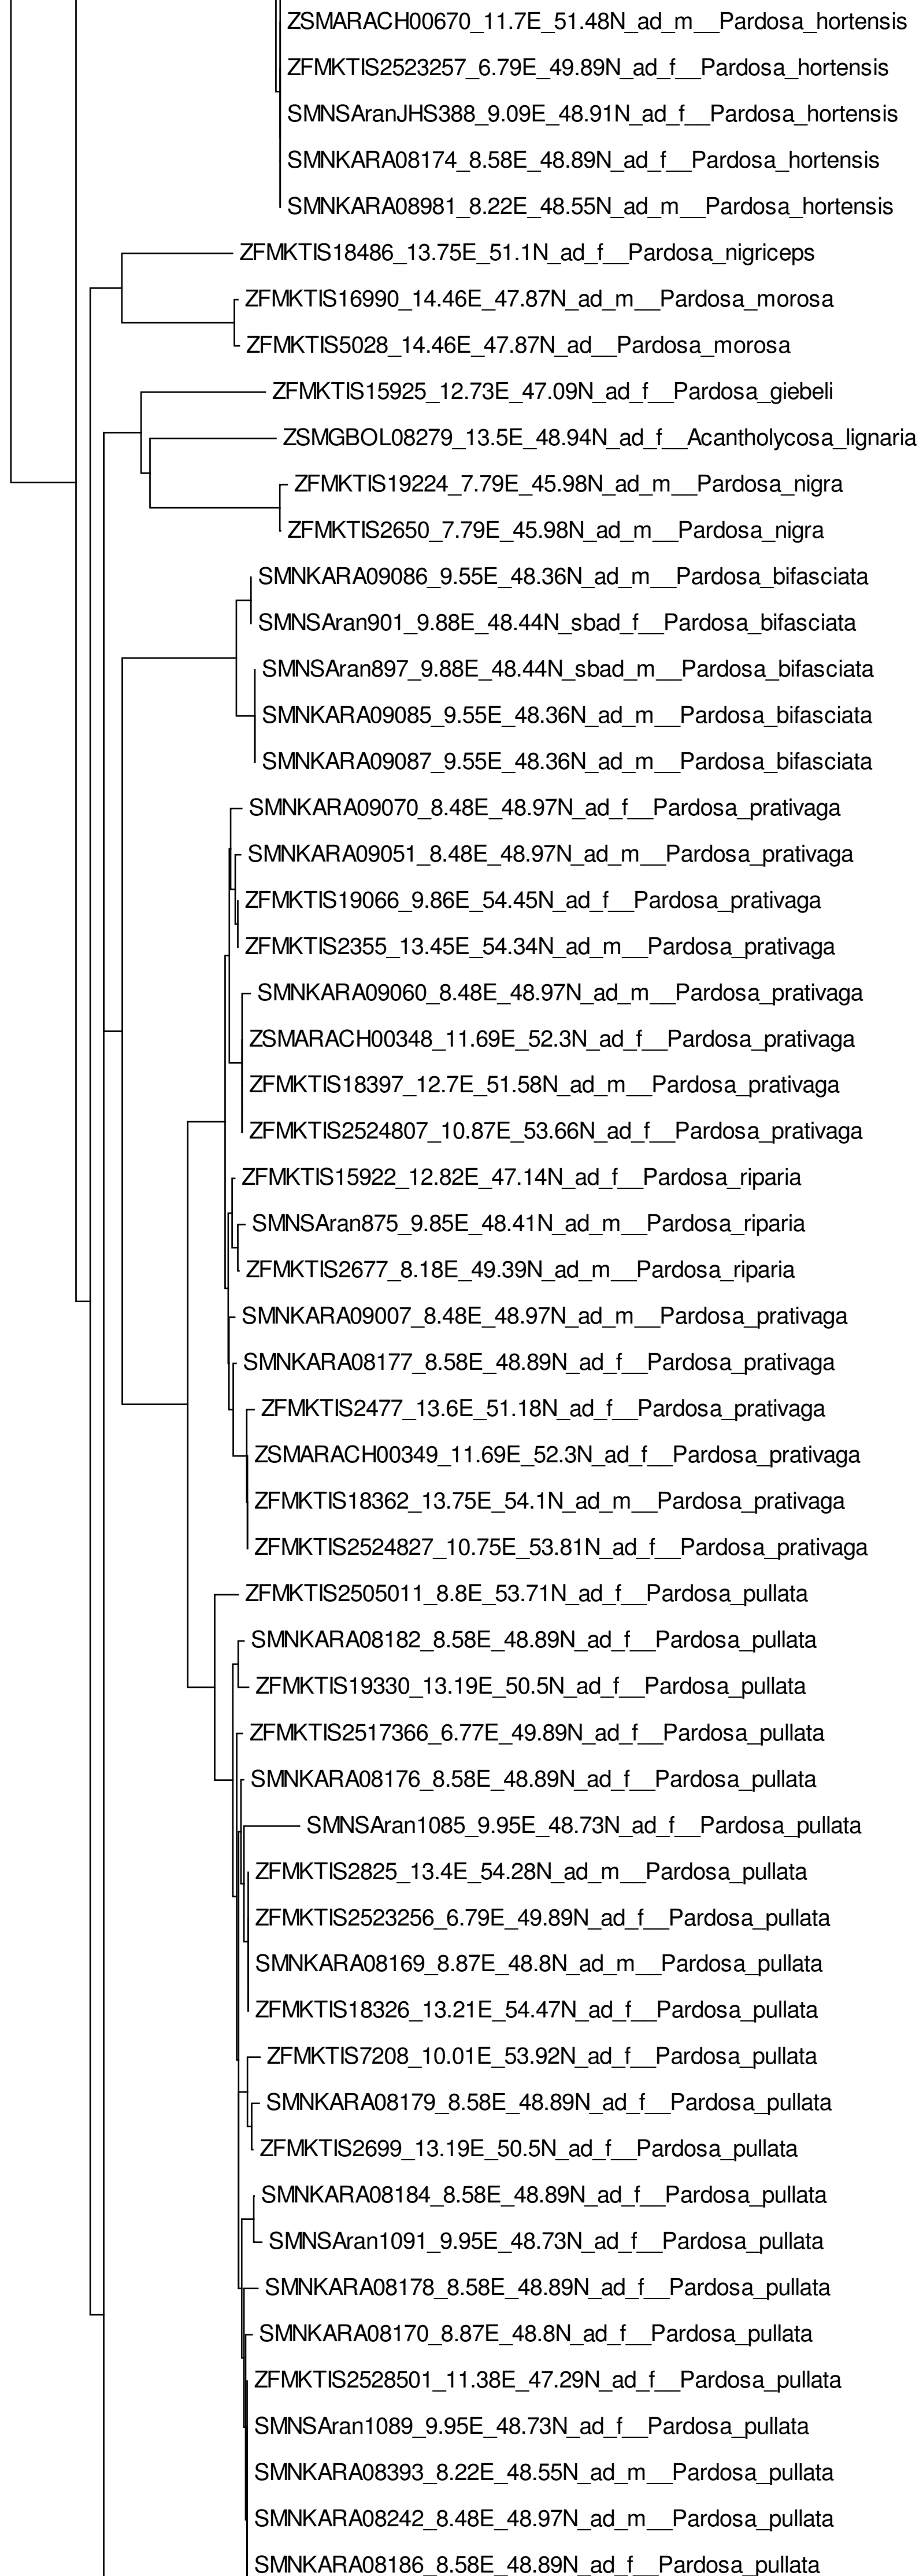



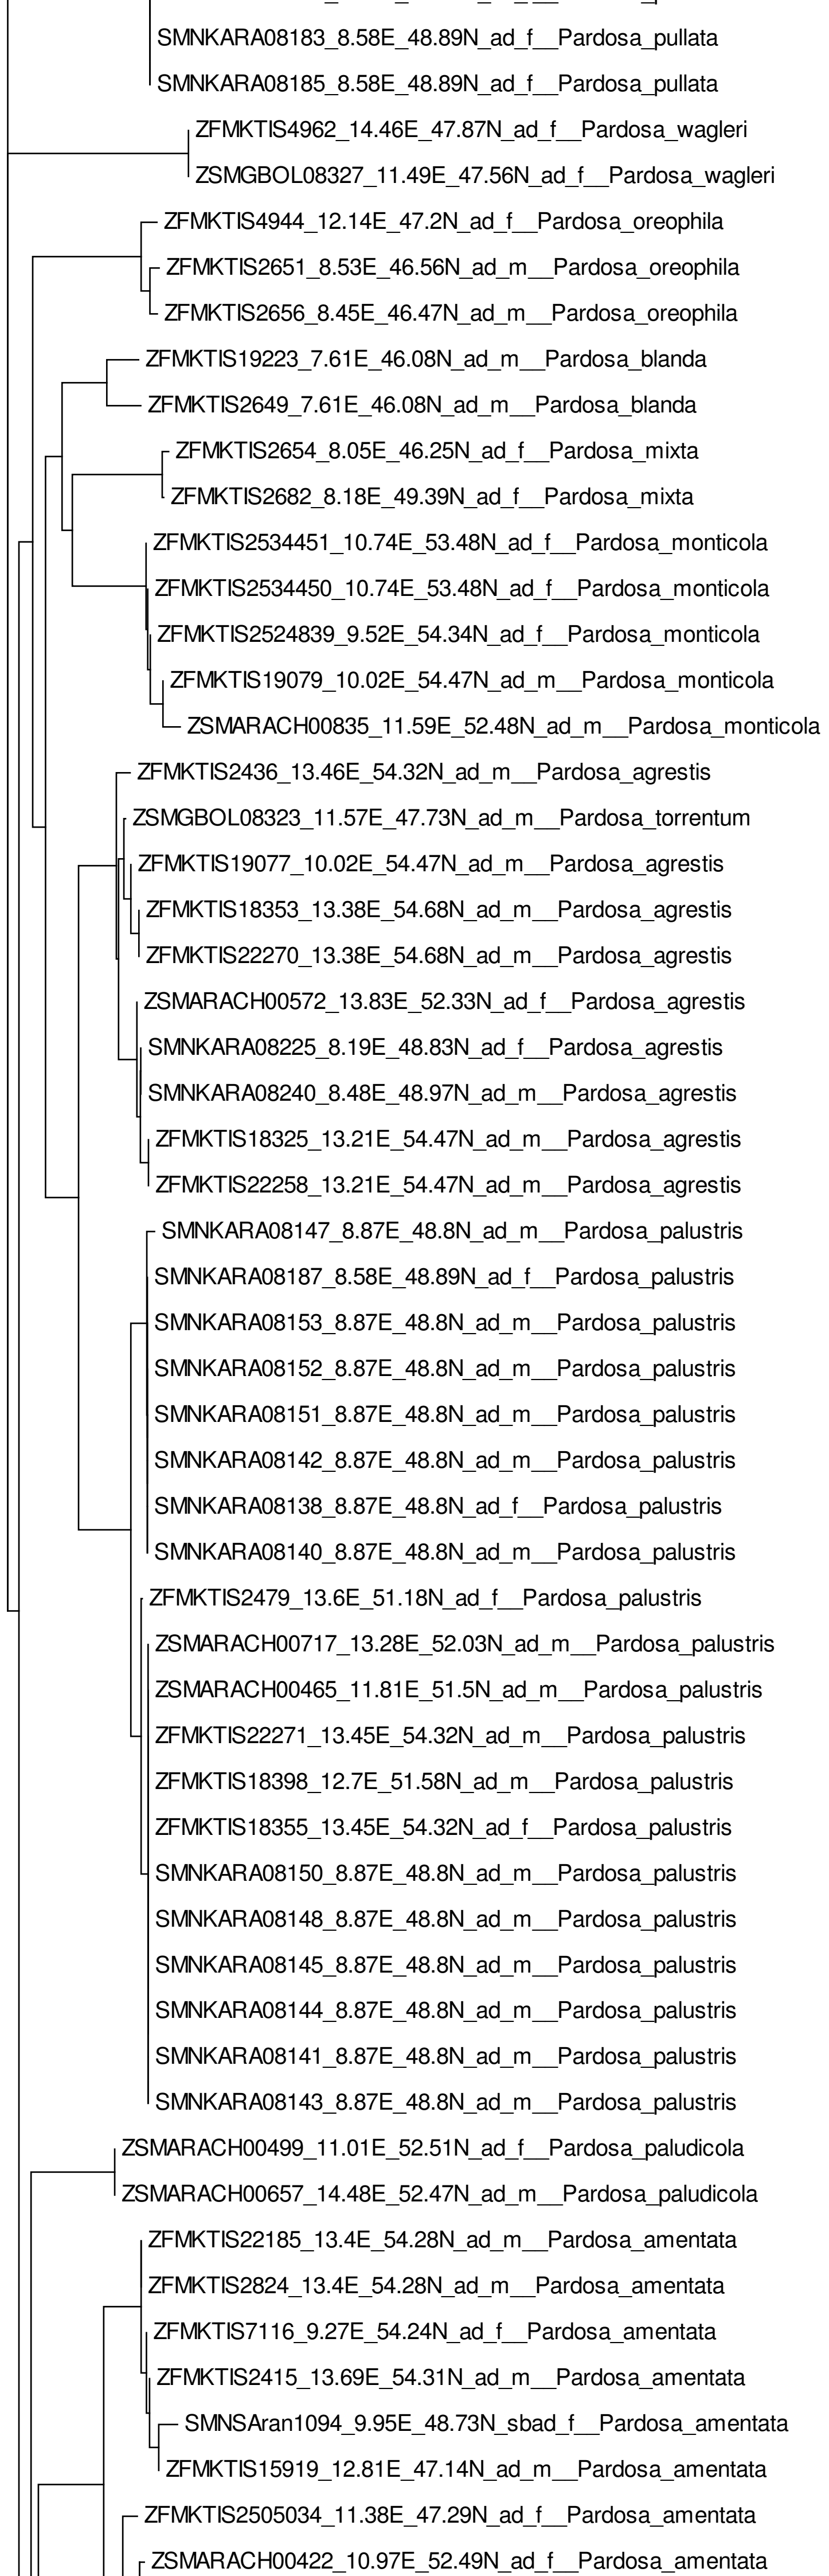

ZSMARACH00422\_10.97E\_52.49N\_ad\_f\_\_Pardosa\_amentata  
ZFMKTIS2524826\_10.75E\_53.81N\_ad\_f\_\_Pardosa\_amentata  
ZSMARACH00421\_10.97E\_52.49N\_ad\_f\_\_Pardosa\_amentata  
ZFMKTIS4979\_13.68E\_47.84N\_ad\_m\_\_Pardosa\_amentata  
ZFMKTIS2639\_13.95E\_51.34N\_ad\_f\_\_Pardosa\_amentata  
SMNSAran1093\_9.95E\_48.73N\_sbada\_m\_\_Pardosa\_amentata  
ZFMKTIS2475\_13.6E\_51.18N\_ad\_m\_\_Pardosa\_amentata  
ZFMKTIS2505033\_11.38E\_47.29N\_ad\_m\_\_Pardosa\_amentata  
ZSMGBOL08312\_11.48E\_48.41N\_ad\_m\_\_Pardosa\_amentata  
ZFMKTIS19225\_8.43E\_46.59N\_ad\_m\_\_Pardosa\_amentata  
SMNSAran799\_9.60E\_48.56N\_ad\_f\_\_Pardosa\_amentata  
SMNSAran1008\_8.00E\_47.87N\_ad\_f\_\_Pardosa\_amentata  
SMNSAran1090\_9.95E\_48.73N\_sbada\_m\_\_Pardosa\_amentata  
SMNSAran1092\_9.95E\_48.73N\_sbada\_f\_\_Pardosa\_amentata  
SMNSAran999\_8.00E\_47.87N\_ad\_m\_\_Pardosa\_amentata  
SMNKARA08241\_8.22E\_48.53N\_ad\_f\_\_Pardosa\_amentata  
ZFMKTIS2653\_8.43E\_46.59N\_ad\_m\_\_Pardosa\_amentata  
ZFMKTIS2504860\_8.96E\_51.17N\_ad\_f\_\_Pardosa\_amentata  
ZFMKTIS2504859\_8.96E\_51.17N\_ad\_m\_\_Pardosa\_amentata  
SMNSAran994\_8.00E\_47.87N\_ad\_m\_\_Pardosa\_amentata  
SMNSAran1001\_8.00E\_47.87N\_ad\_f\_\_Pardosa\_amentata  
SMNSAran1087\_9.95E\_48.73N\_sbada\_f\_\_Pardosa\_amentata  
SMNSAran1088\_9.95E\_48.73N\_sbada\_f\_\_Pardosa\_amentata  
ZFMKTIS2523255\_6.79E\_49.89N\_ad\_f\_\_Pardosa\_lugubris  
SMNSAran840\_8.64E\_49.35N\_ad\_m\_\_Pardosa\_lugubris  
ZFMKGBOL26204\_7.12E\_50.69N\_ad\_m\_\_Pardosa\_lugubris  
SMNSAran887\_9.84E\_48.45N\_ad\_m\_\_Pardosa\_lugubris  
ZFMKTIS22265\_13.32E\_54.33N\_ad\_m\_\_Pardosa\_saltans  
ZFMKTIS18381\_9.46E\_53.53N\_ad\_m\_\_Pardosa\_lugubris  
ZFMKTIS2528509\_11.32E\_47.27N\_ad\_m\_\_Pardosa\_lugubris  
ZFMKTIS22278\_9.46E\_53.53N\_ad\_m\_\_Pardosa\_lugubris  
ZFMKTIS18439\_13.43E\_54.34N\_ad\_m\_\_Pardosa\_lugubris  
SMNSAran860\_9.94E\_48.79N\_ad\_m\_\_Pardosa\_lugubris  
SMNKARA09071\_8.48E\_48.97N\_ad\_m\_\_Pardosa\_saltans  
SMNSAran856\_9.94E\_48.79N\_ad\_m\_\_Pardosa\_lugubris  
SMNKARA08156\_8.87E\_48.8N\_ad\_f\_\_Pardosa\_lugubris  
SMNKARA08161\_8.87E\_48.8N\_ad\_f\_\_Pardosa\_lugubris  
SMNSAranJHS389\_9.09E\_48.91N\_ad\_f\_\_Pardosa\_lugubris  
SMNSAran826\_8.64E\_49.35N\_sbada\_f\_\_Pardosa\_lugubris  
ZFMKTIS2523254\_6.79E\_49.89N\_ad\_m\_\_Pardosa\_lugubris  
SMNSAran862\_9.94E\_48.79N\_ad\_f\_\_Pardosa\_lugubris  
SMNKARA08329\_8.48E\_48.97N\_ad\_f\_\_Pardosa\_lugubris  
SMNSAran854\_9.94E\_48.79N\_ad\_m\_\_Pardosa\_lugubris  
SMNSAran748\_10.26E\_47.66N\_ad\_f\_\_Pardosa\_lugubris  
SMNSAran873\_9.85E\_48.41N\_ad\_f\_\_Pardosa\_lugubris  
SMNKARA08165\_8.87E\_48.8N\_ad\_f\_\_Pardosa\_lugubris  
ZFMKTIS7107\_10.76E\_53.87N\_ad\_m\_\_Pardosa\_saltans  
ZFMKTIS2531765\_12.87E\_53.4N\_ad\_f\_\_Pardosa\_lugubris  
ZFMKTIS2531749\_12.87E\_53.4N\_ad\_f\_\_Pardosa\_lugubris  
ZFMKTIS18340\_13.32E\_54.33N\_ad\_m\_\_Pardosa\_saltans  
ZFMKTIS2531735\_12.91E\_53.36N\_ad\_f\_\_Pardosa\_lugubris  
SMNSAran874\_9.85E\_48.41N\_ad\_m\_\_Pardosa\_lugubris  
ZFMKTIS22349\_10.76E\_53.87N\_ad\_m\_\_Pardosa\_saltans  
SMNKARA08167\_8.87E\_48.8N\_ad\_m\_\_Pardosa\_lugubris  
ZSMGBOL08289\_11.49E\_48.24N\_ad\_f\_\_Pardosa\_lugubris  
ZFMKTIS2531747\_12.87E\_53.4N\_ad\_m\_\_Pardosa\_lugubris  
ZFMKTIS2639\_13.95E\_51.34N\_ad\_f\_\_Pardosa\_lugubris



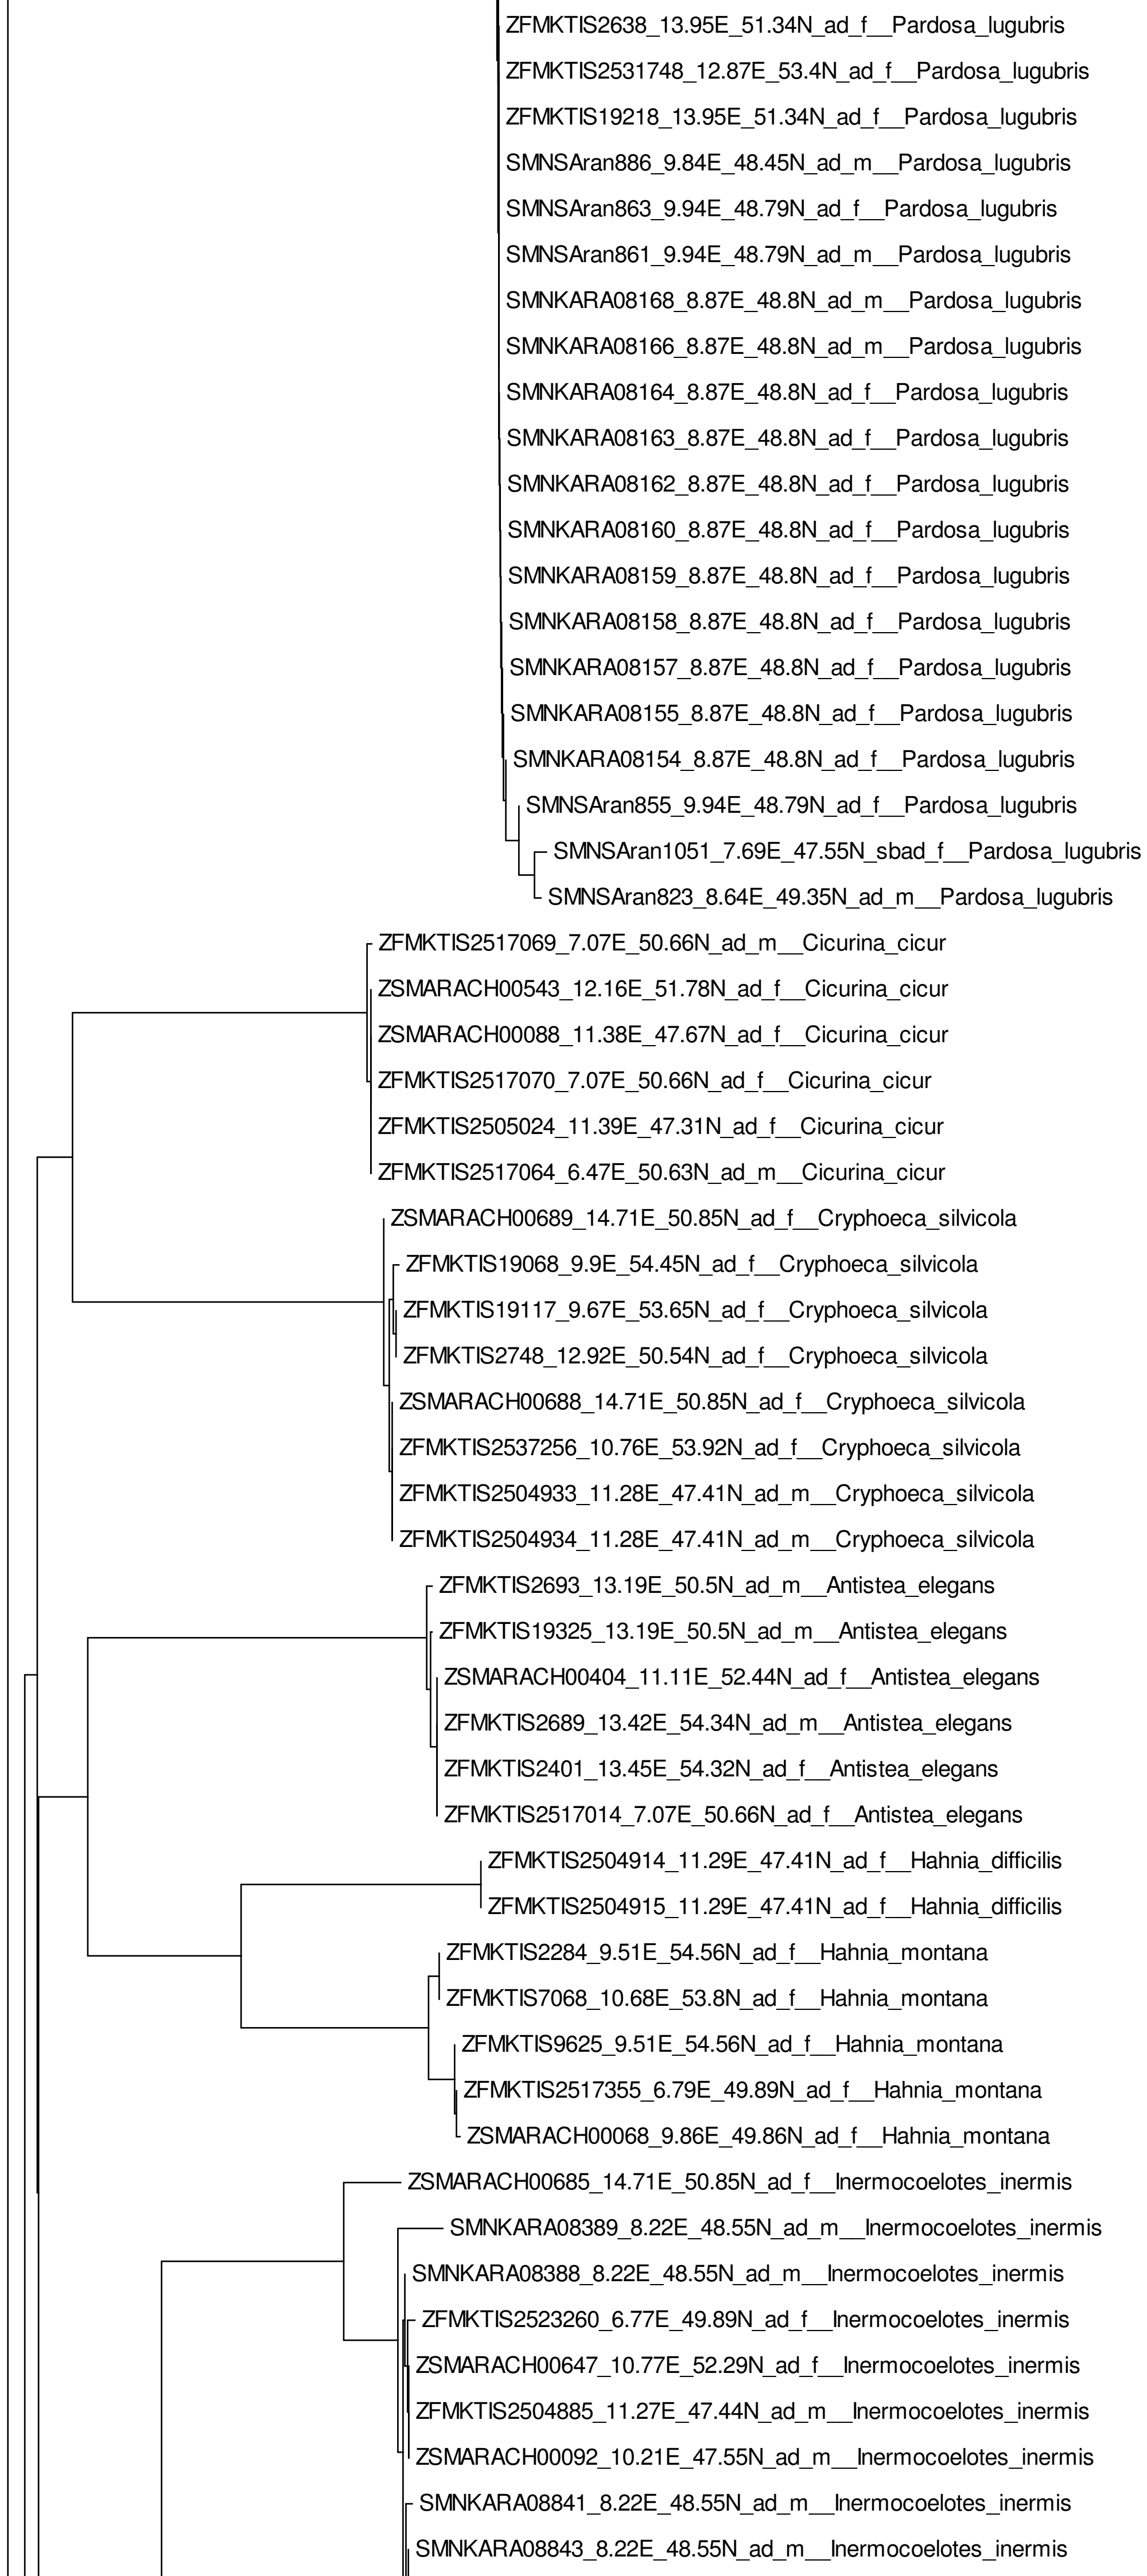

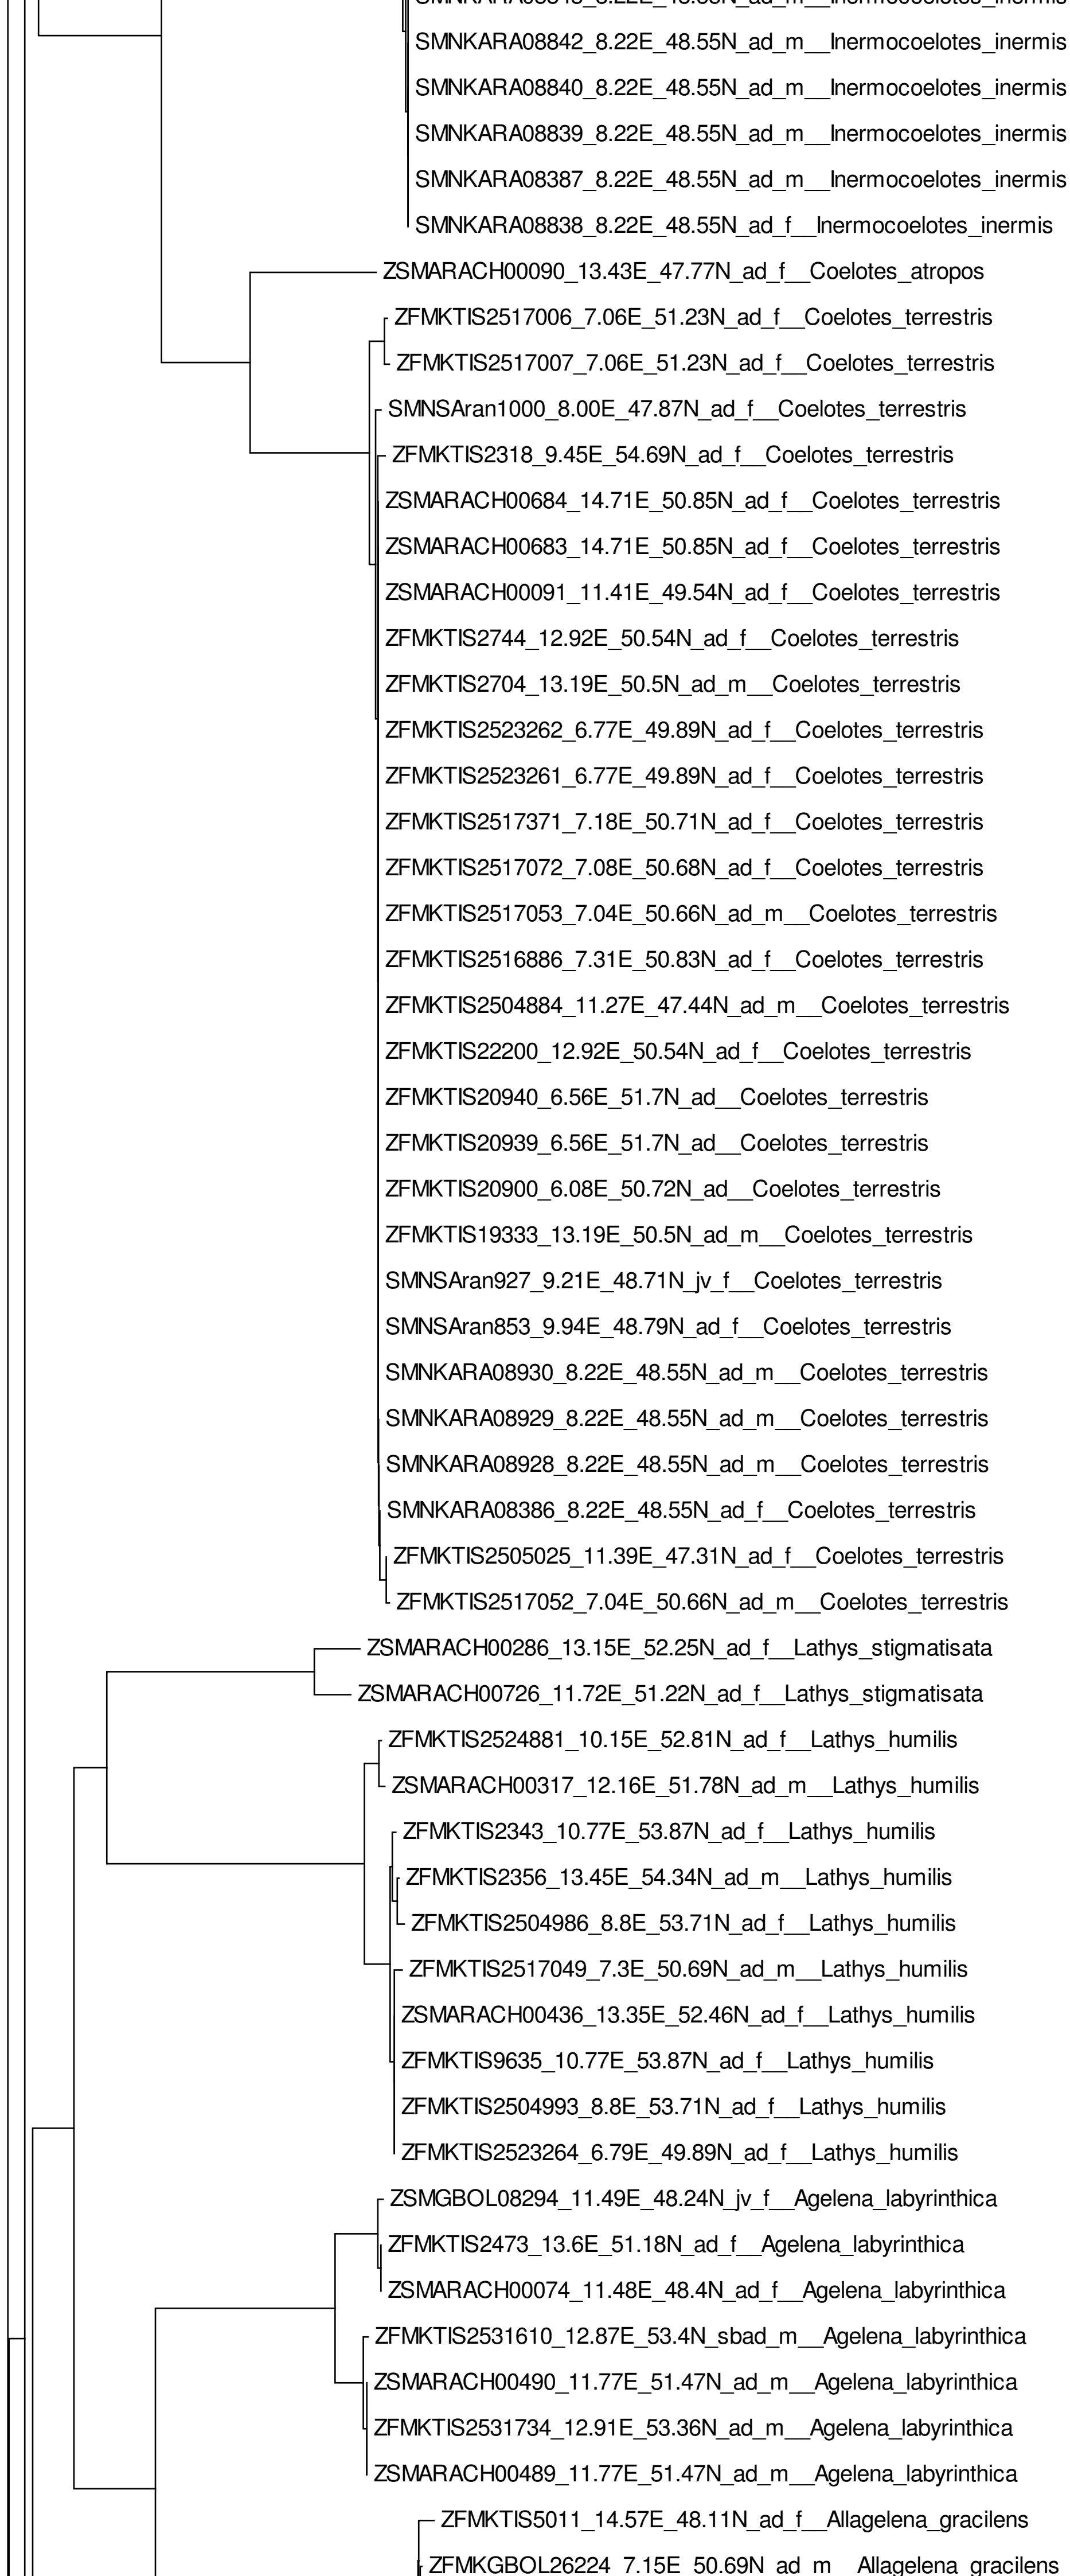



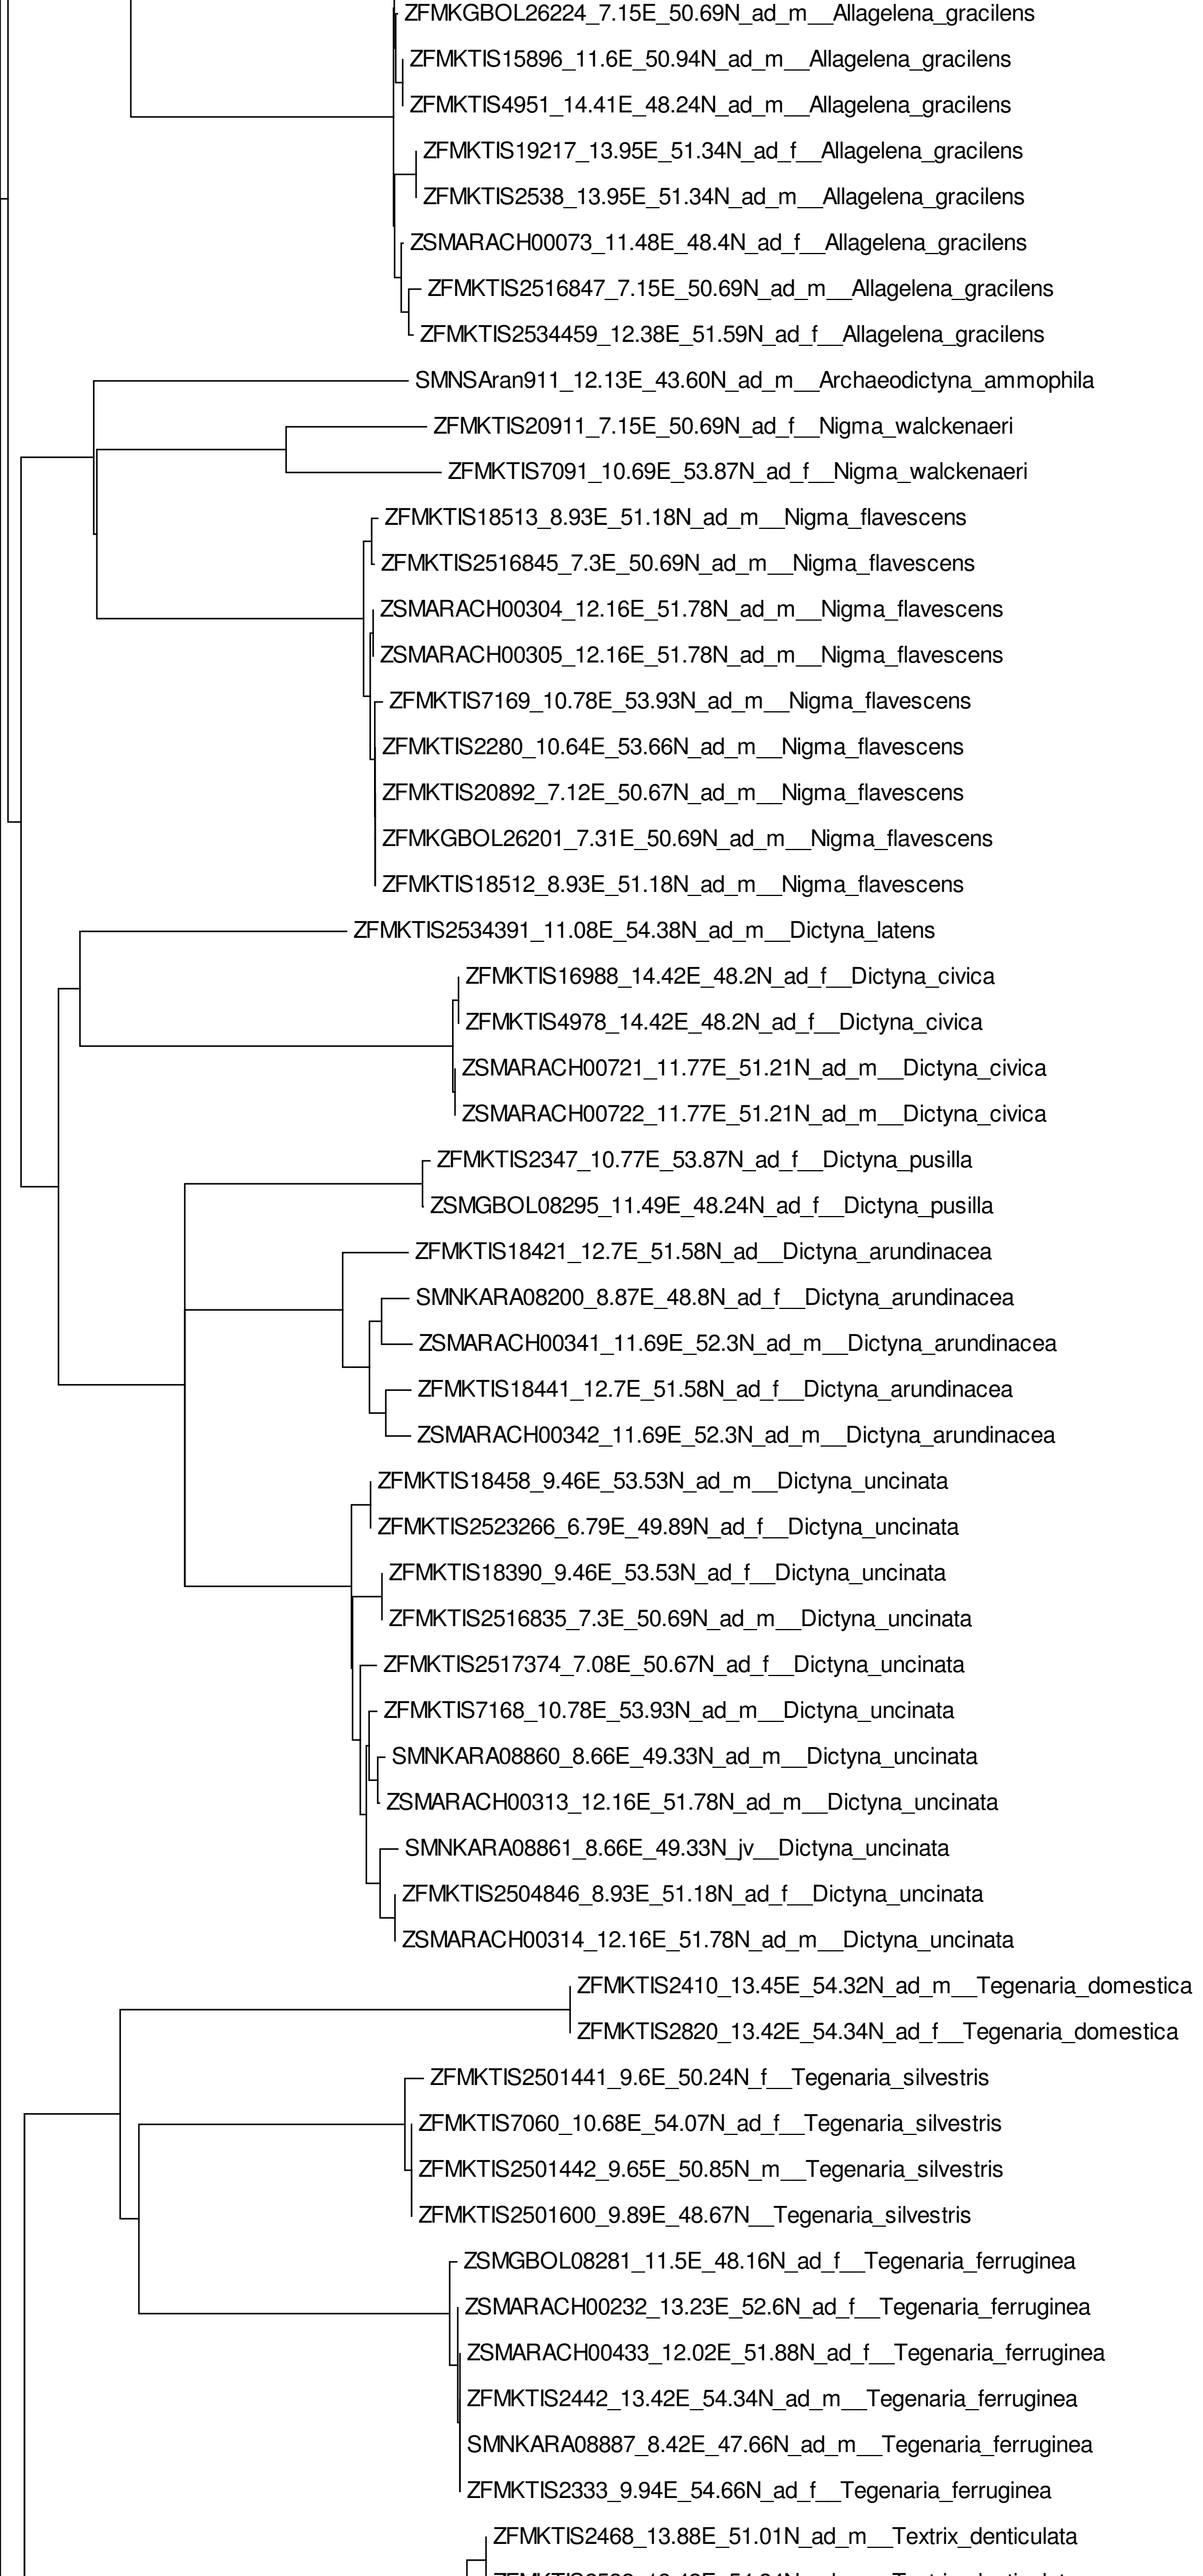

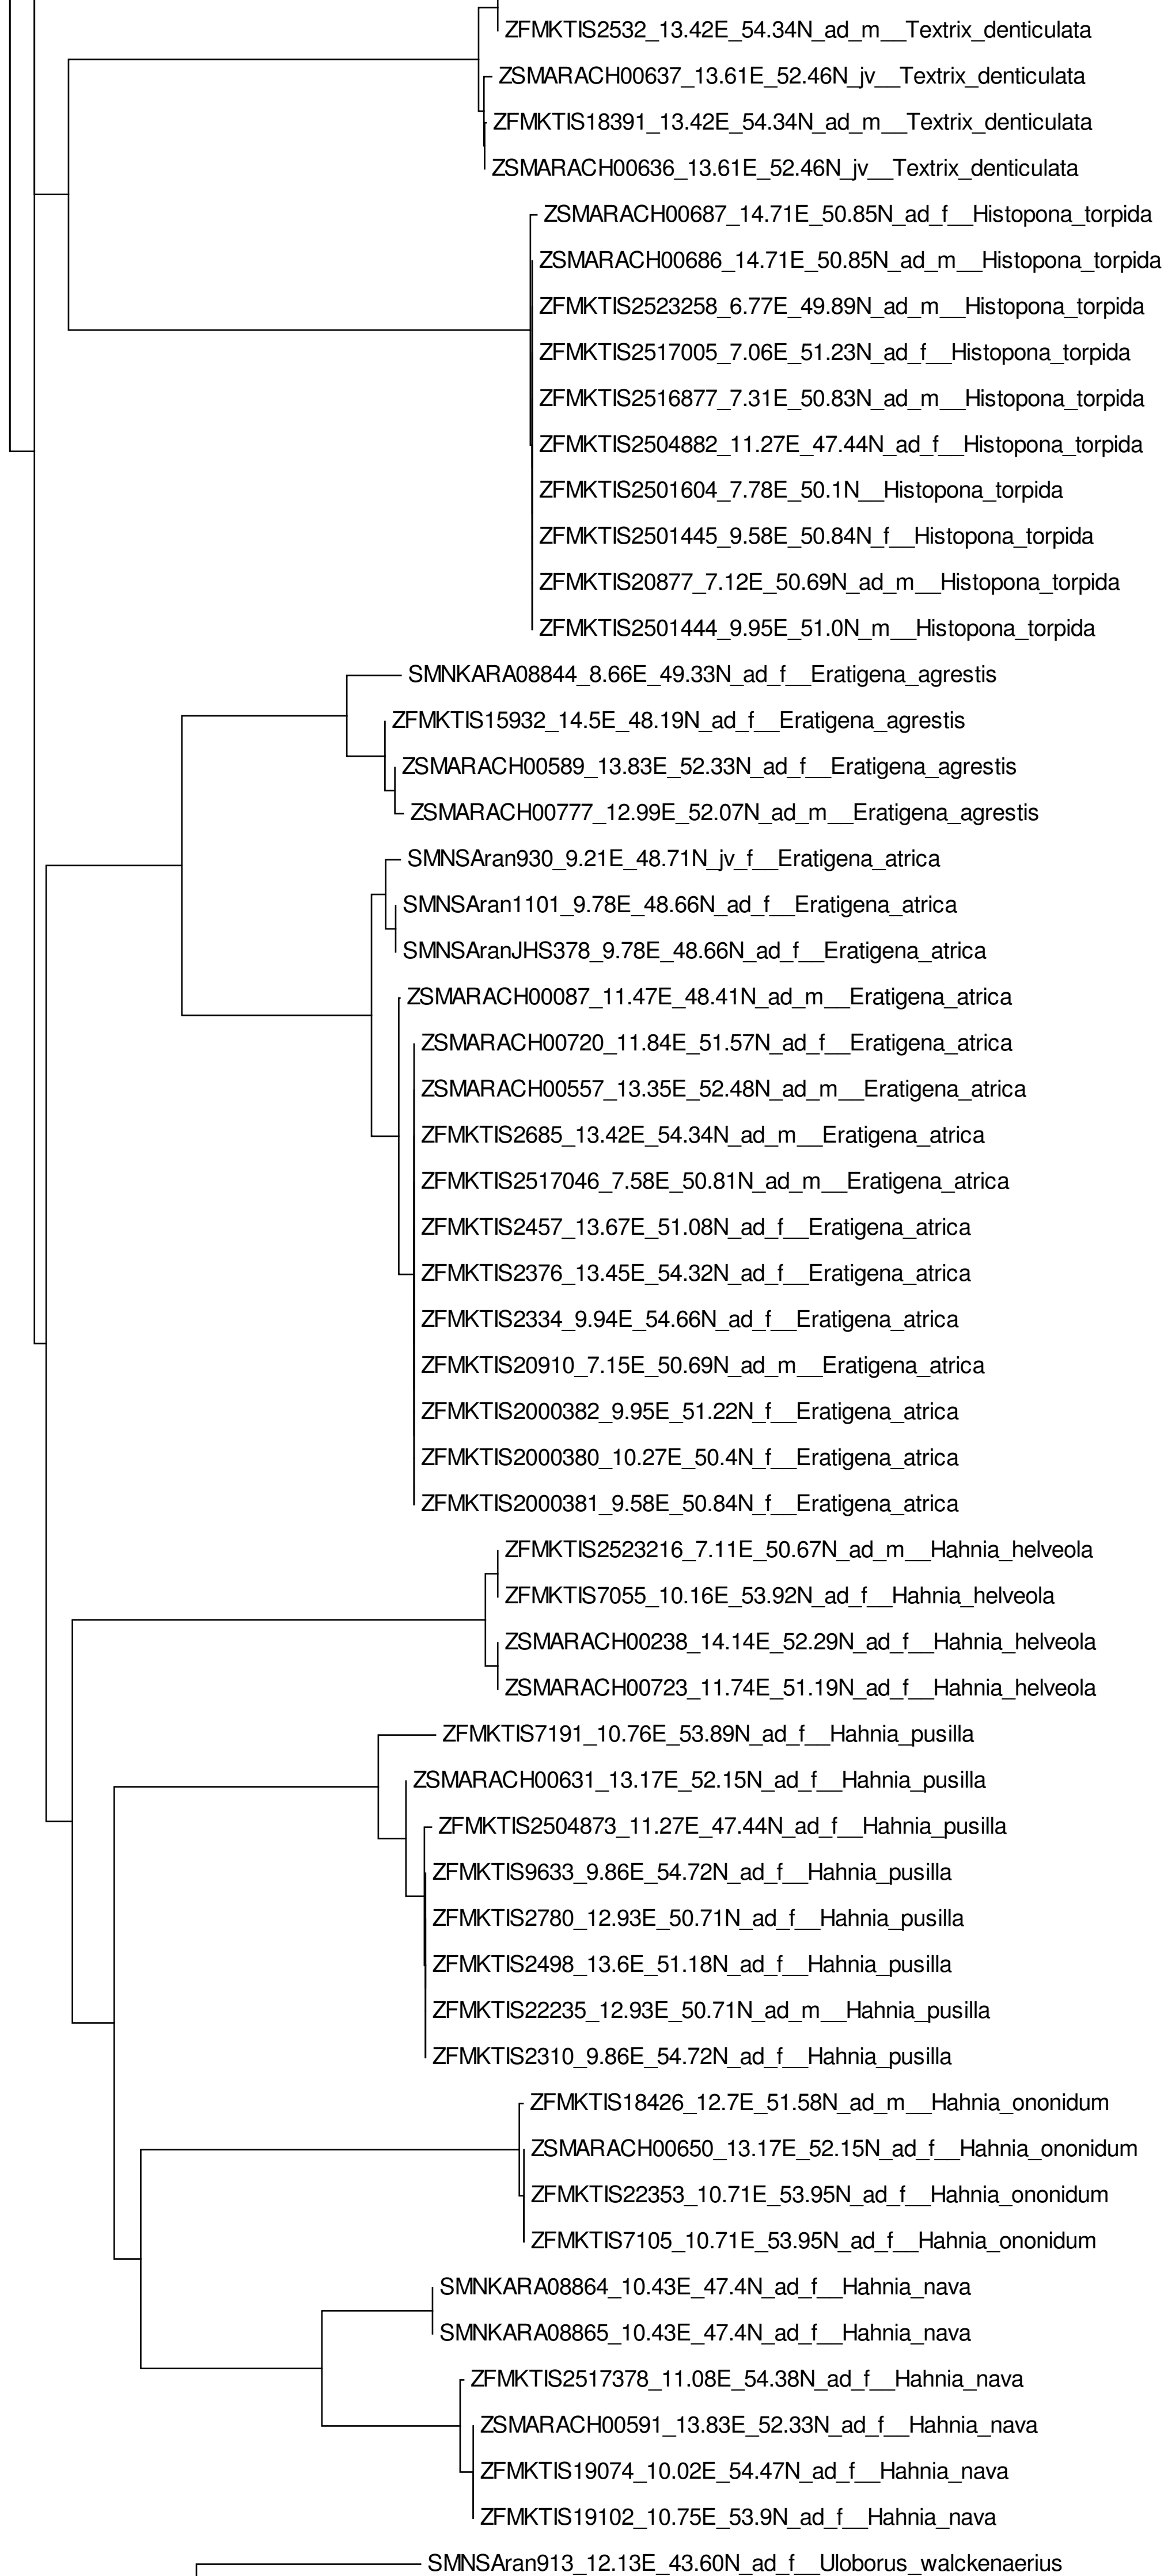



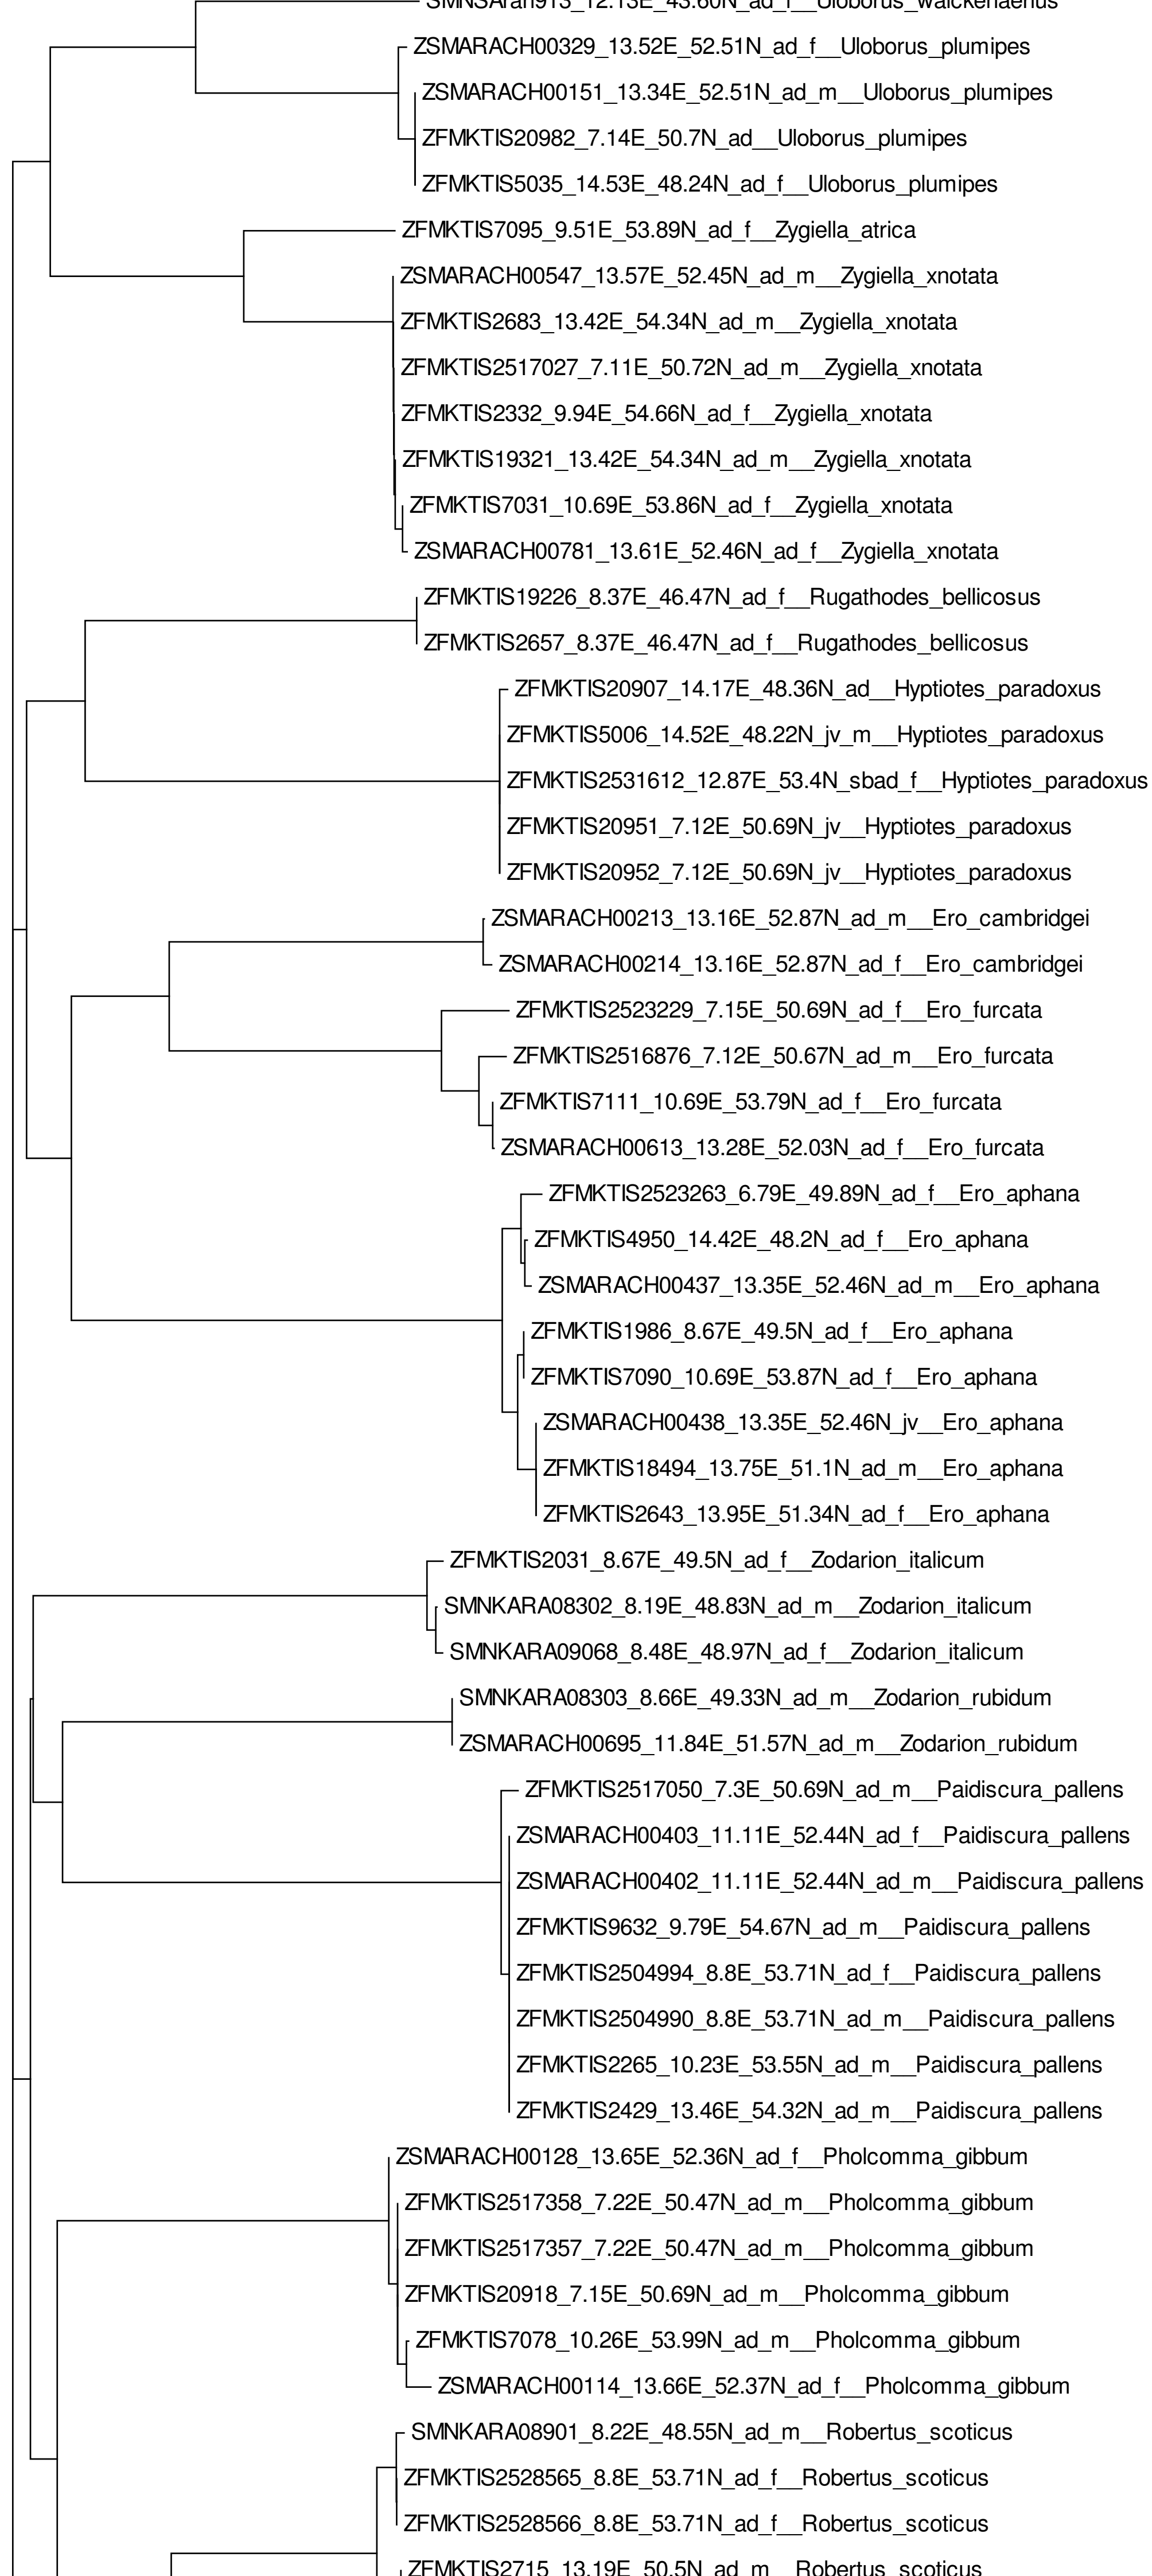

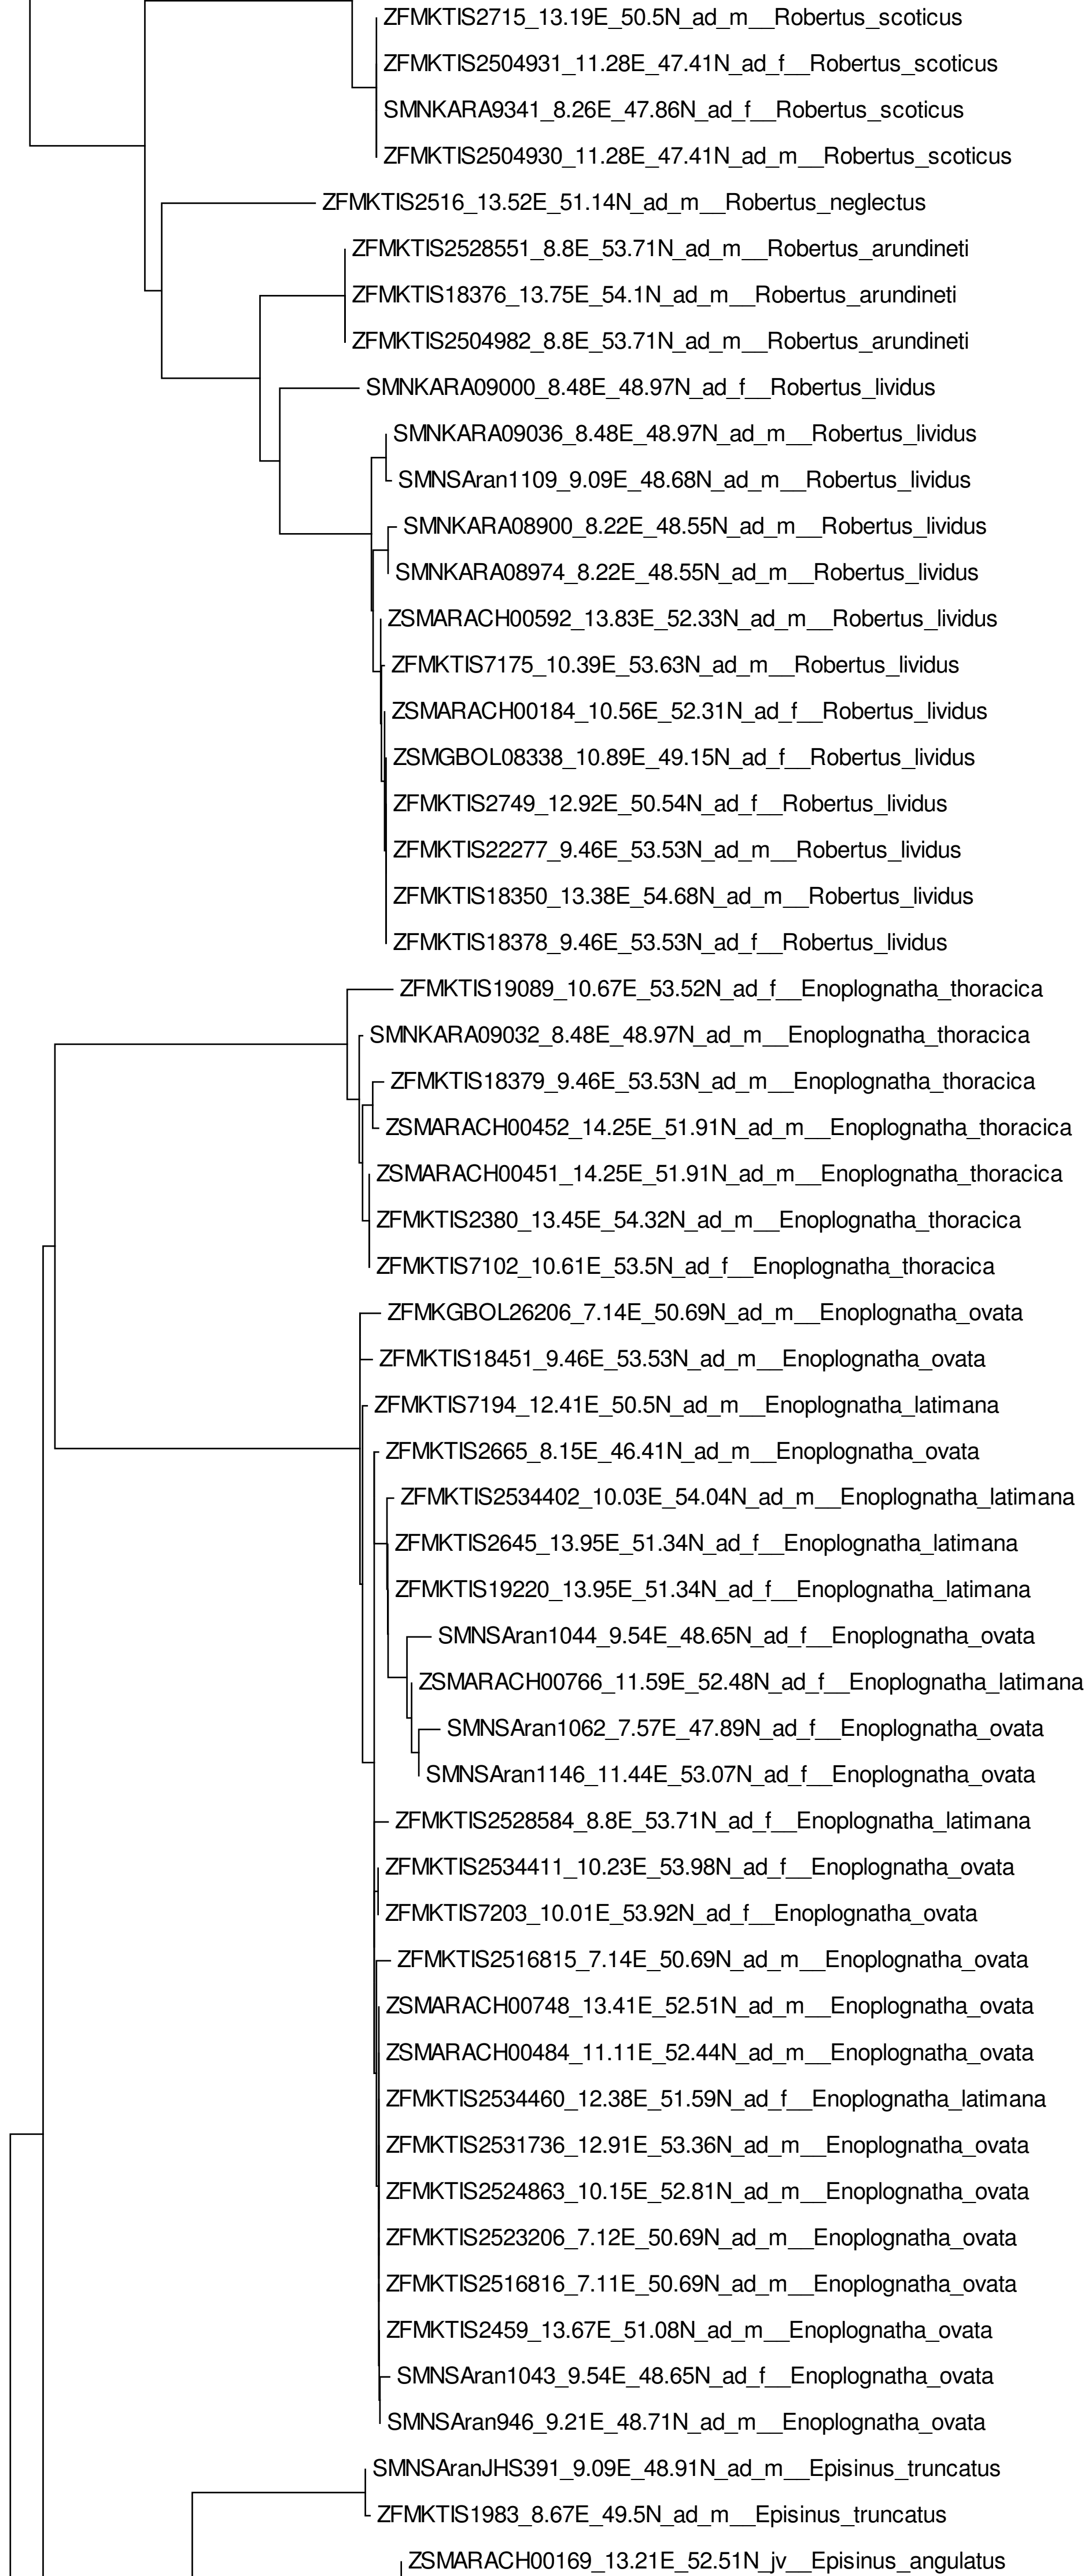



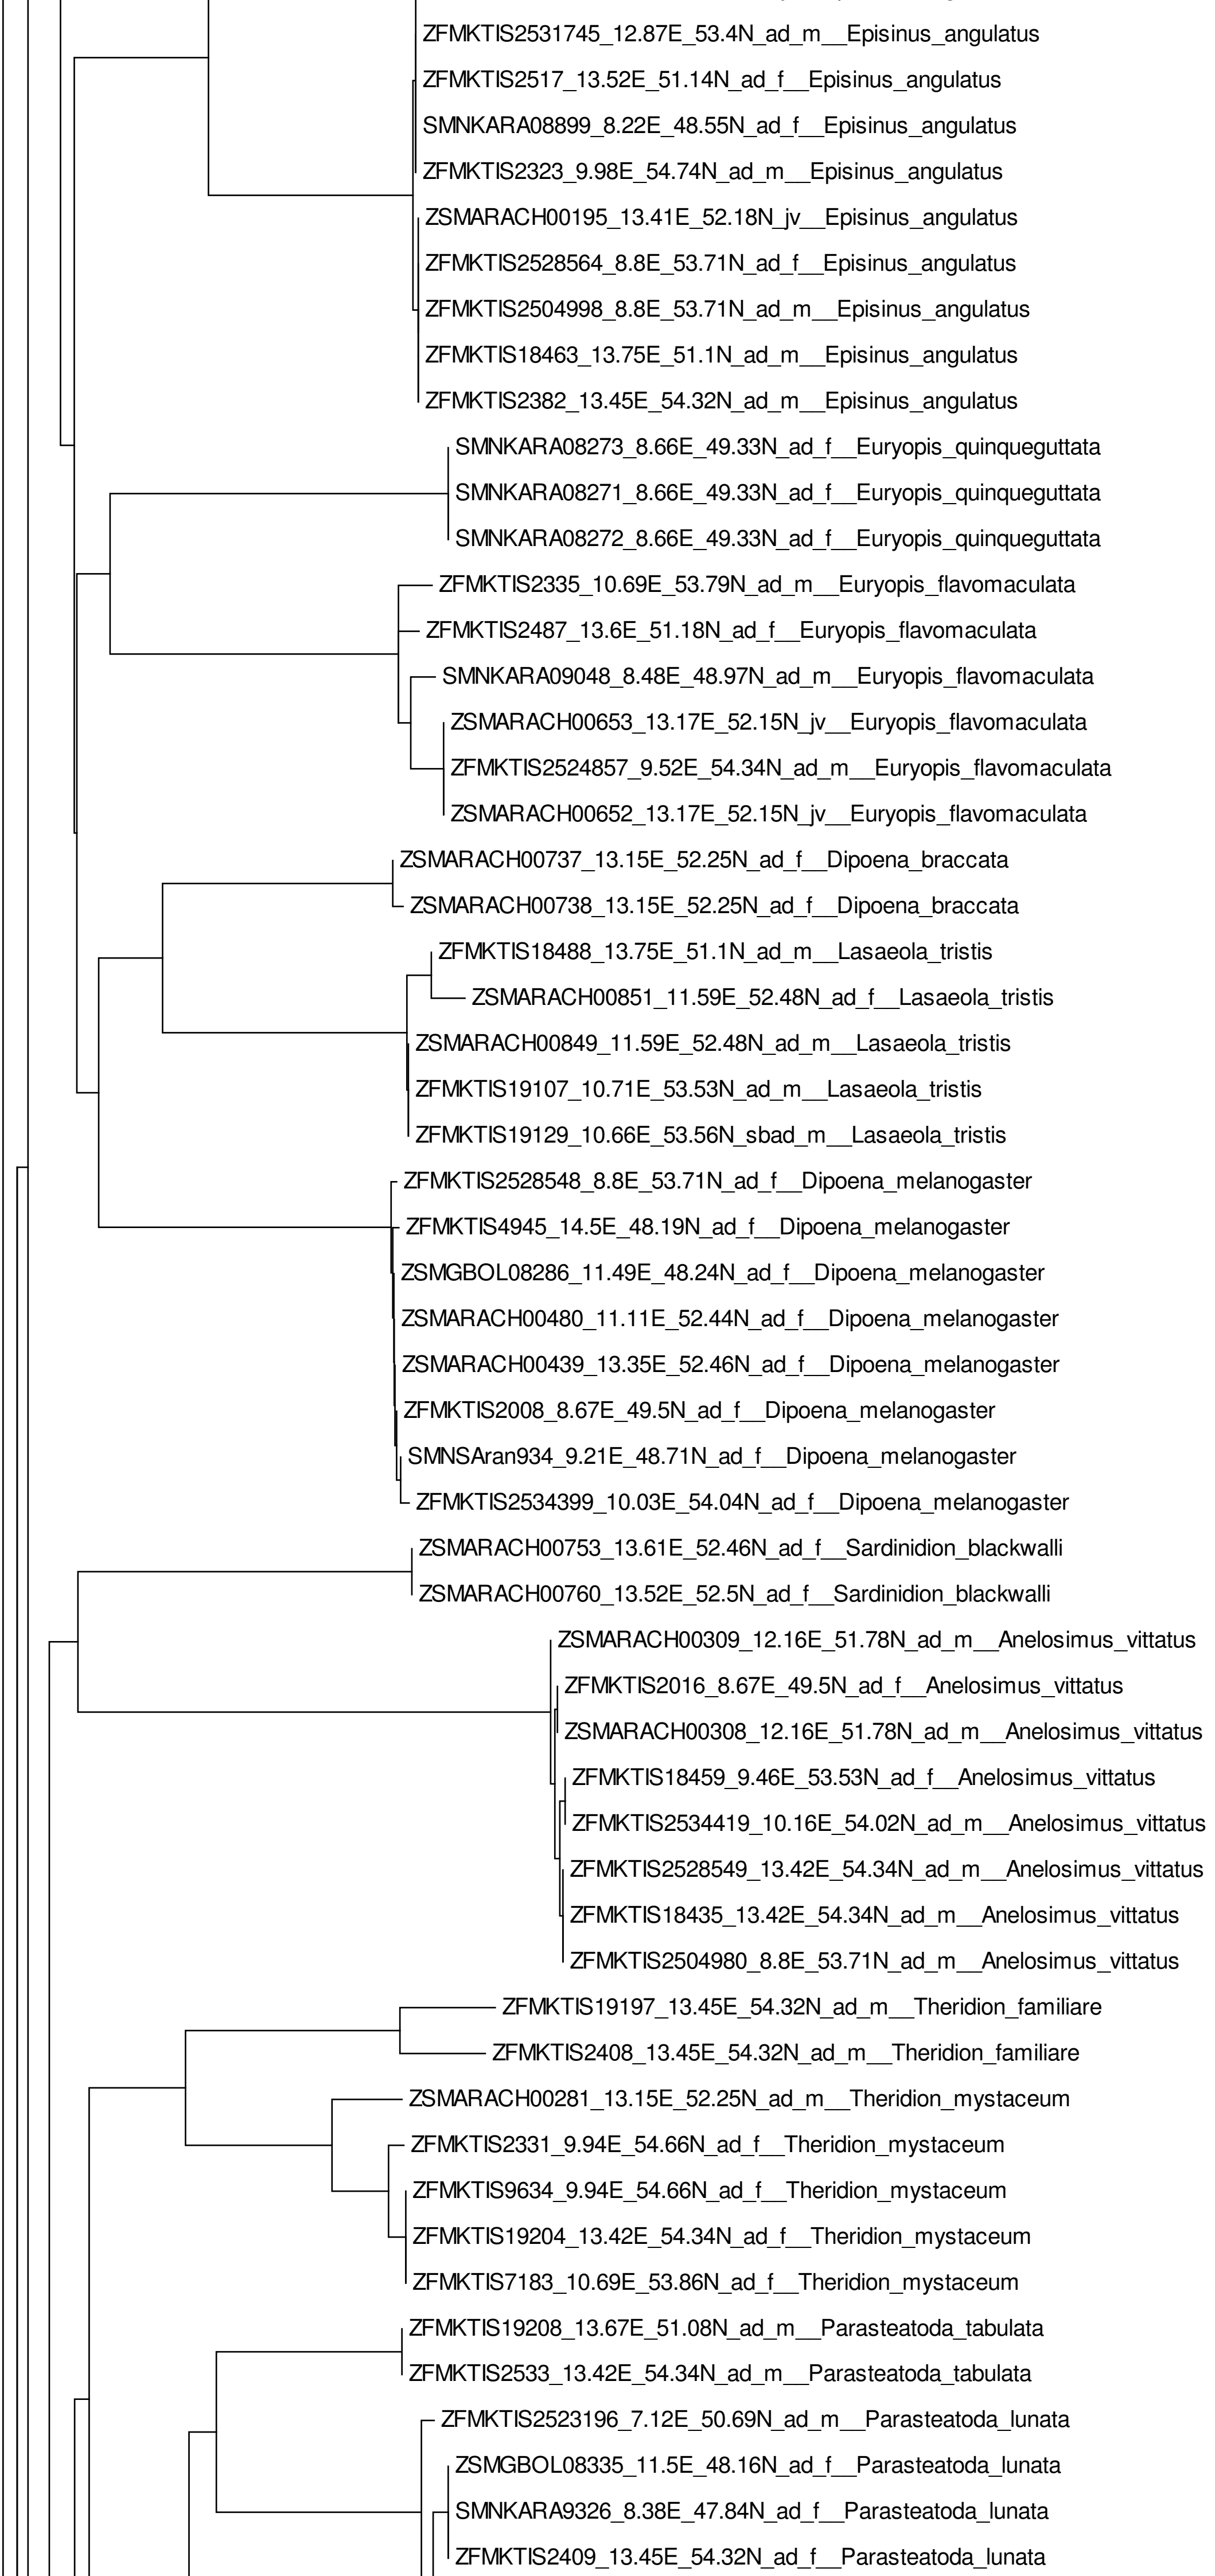

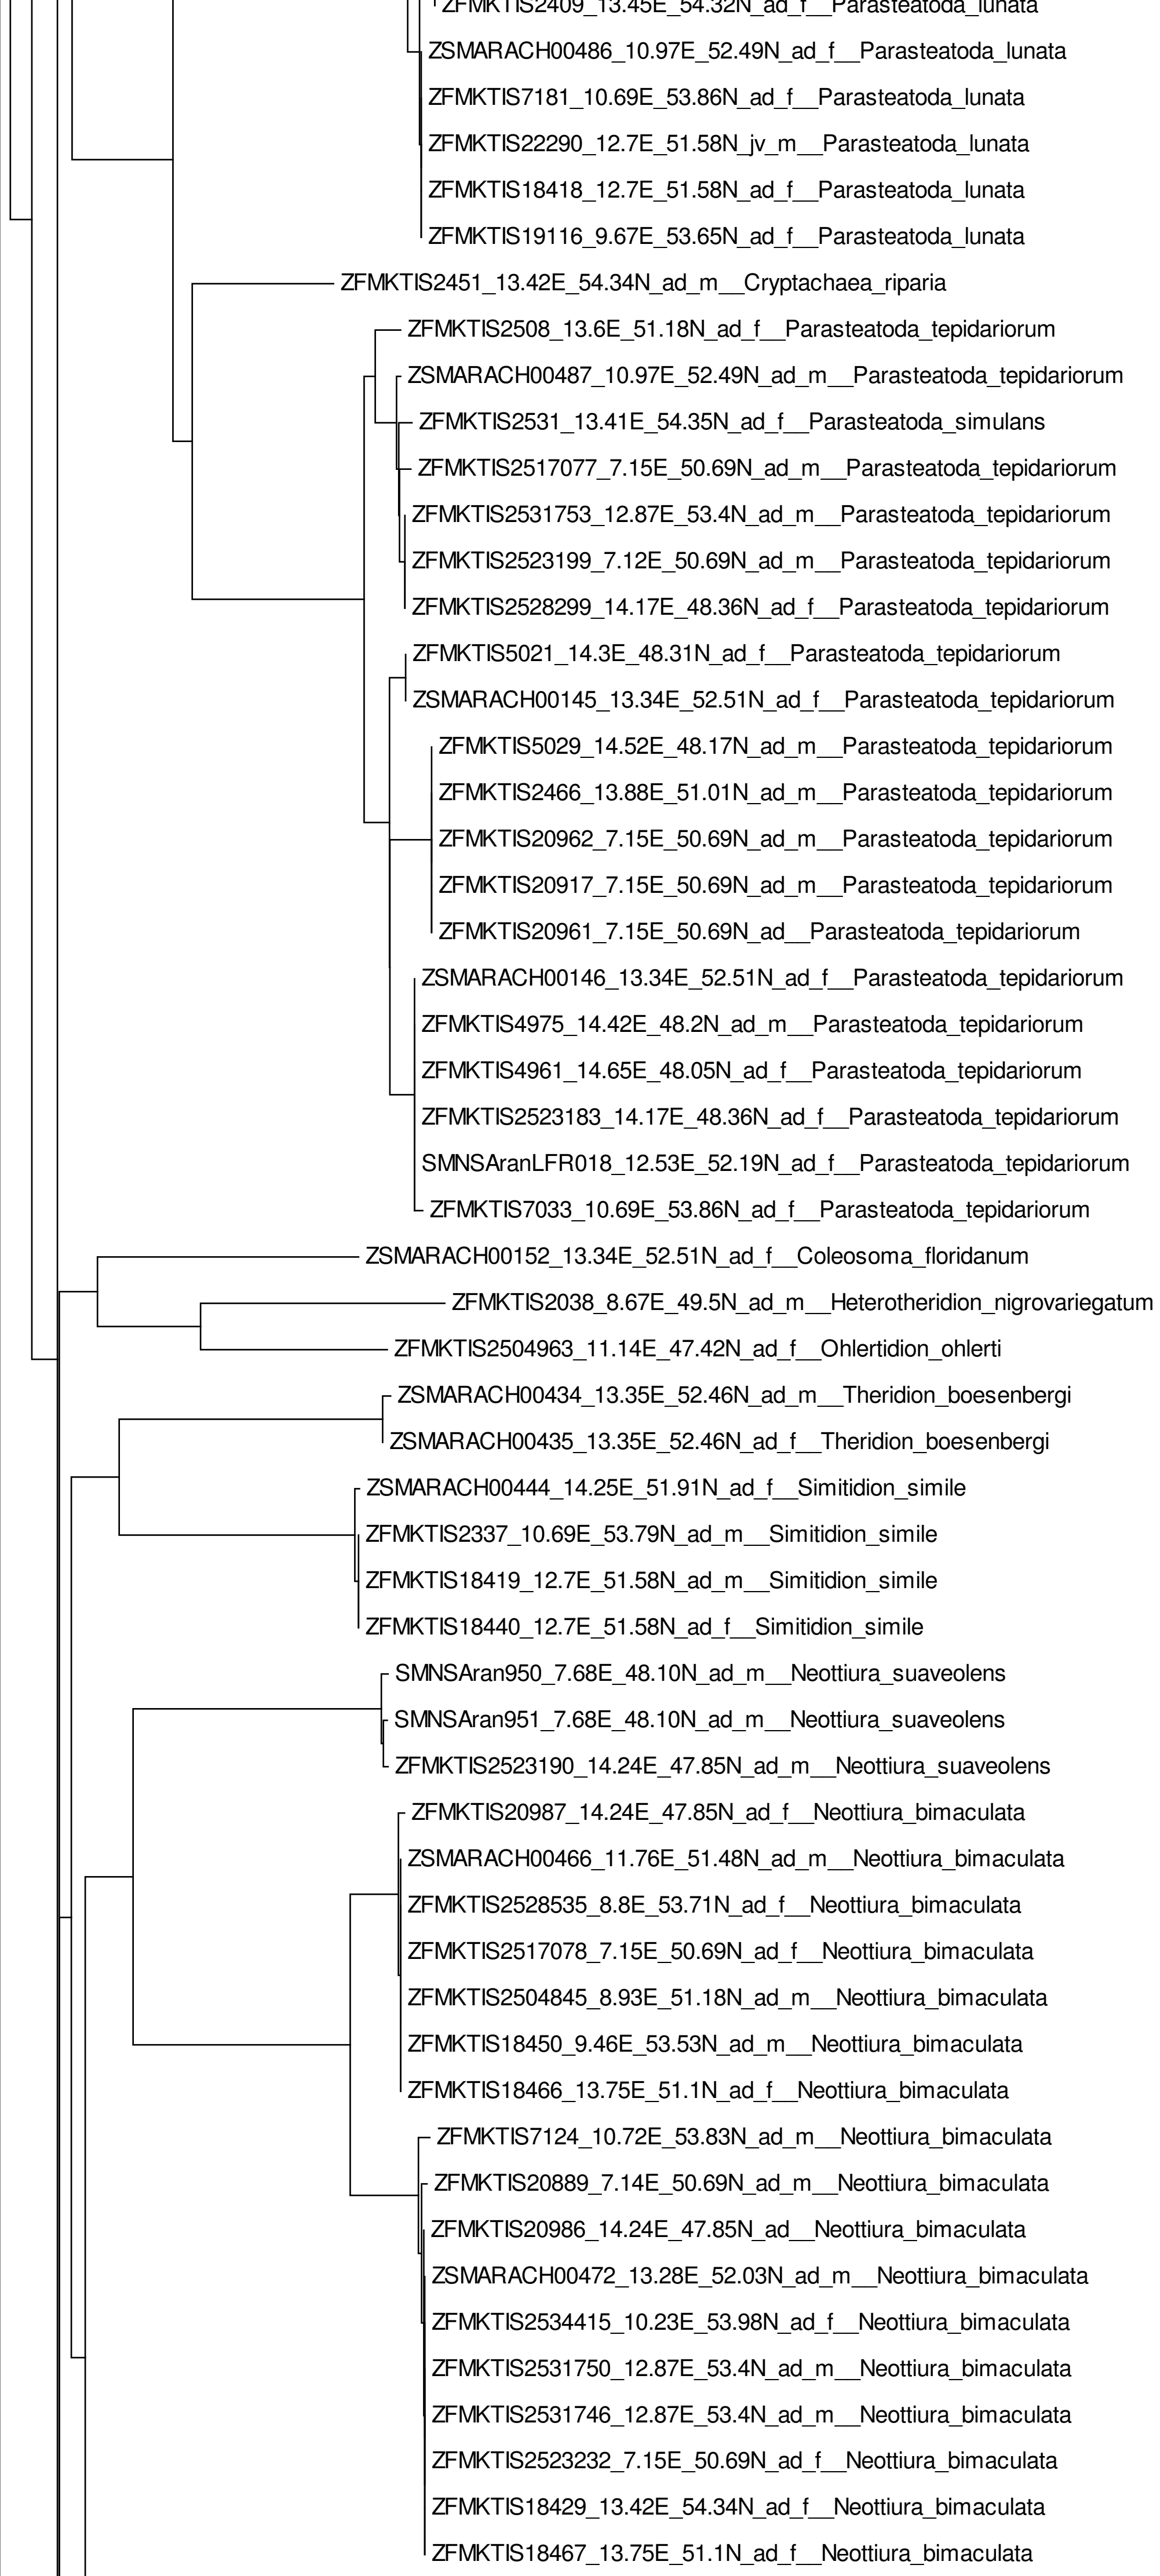

0.02



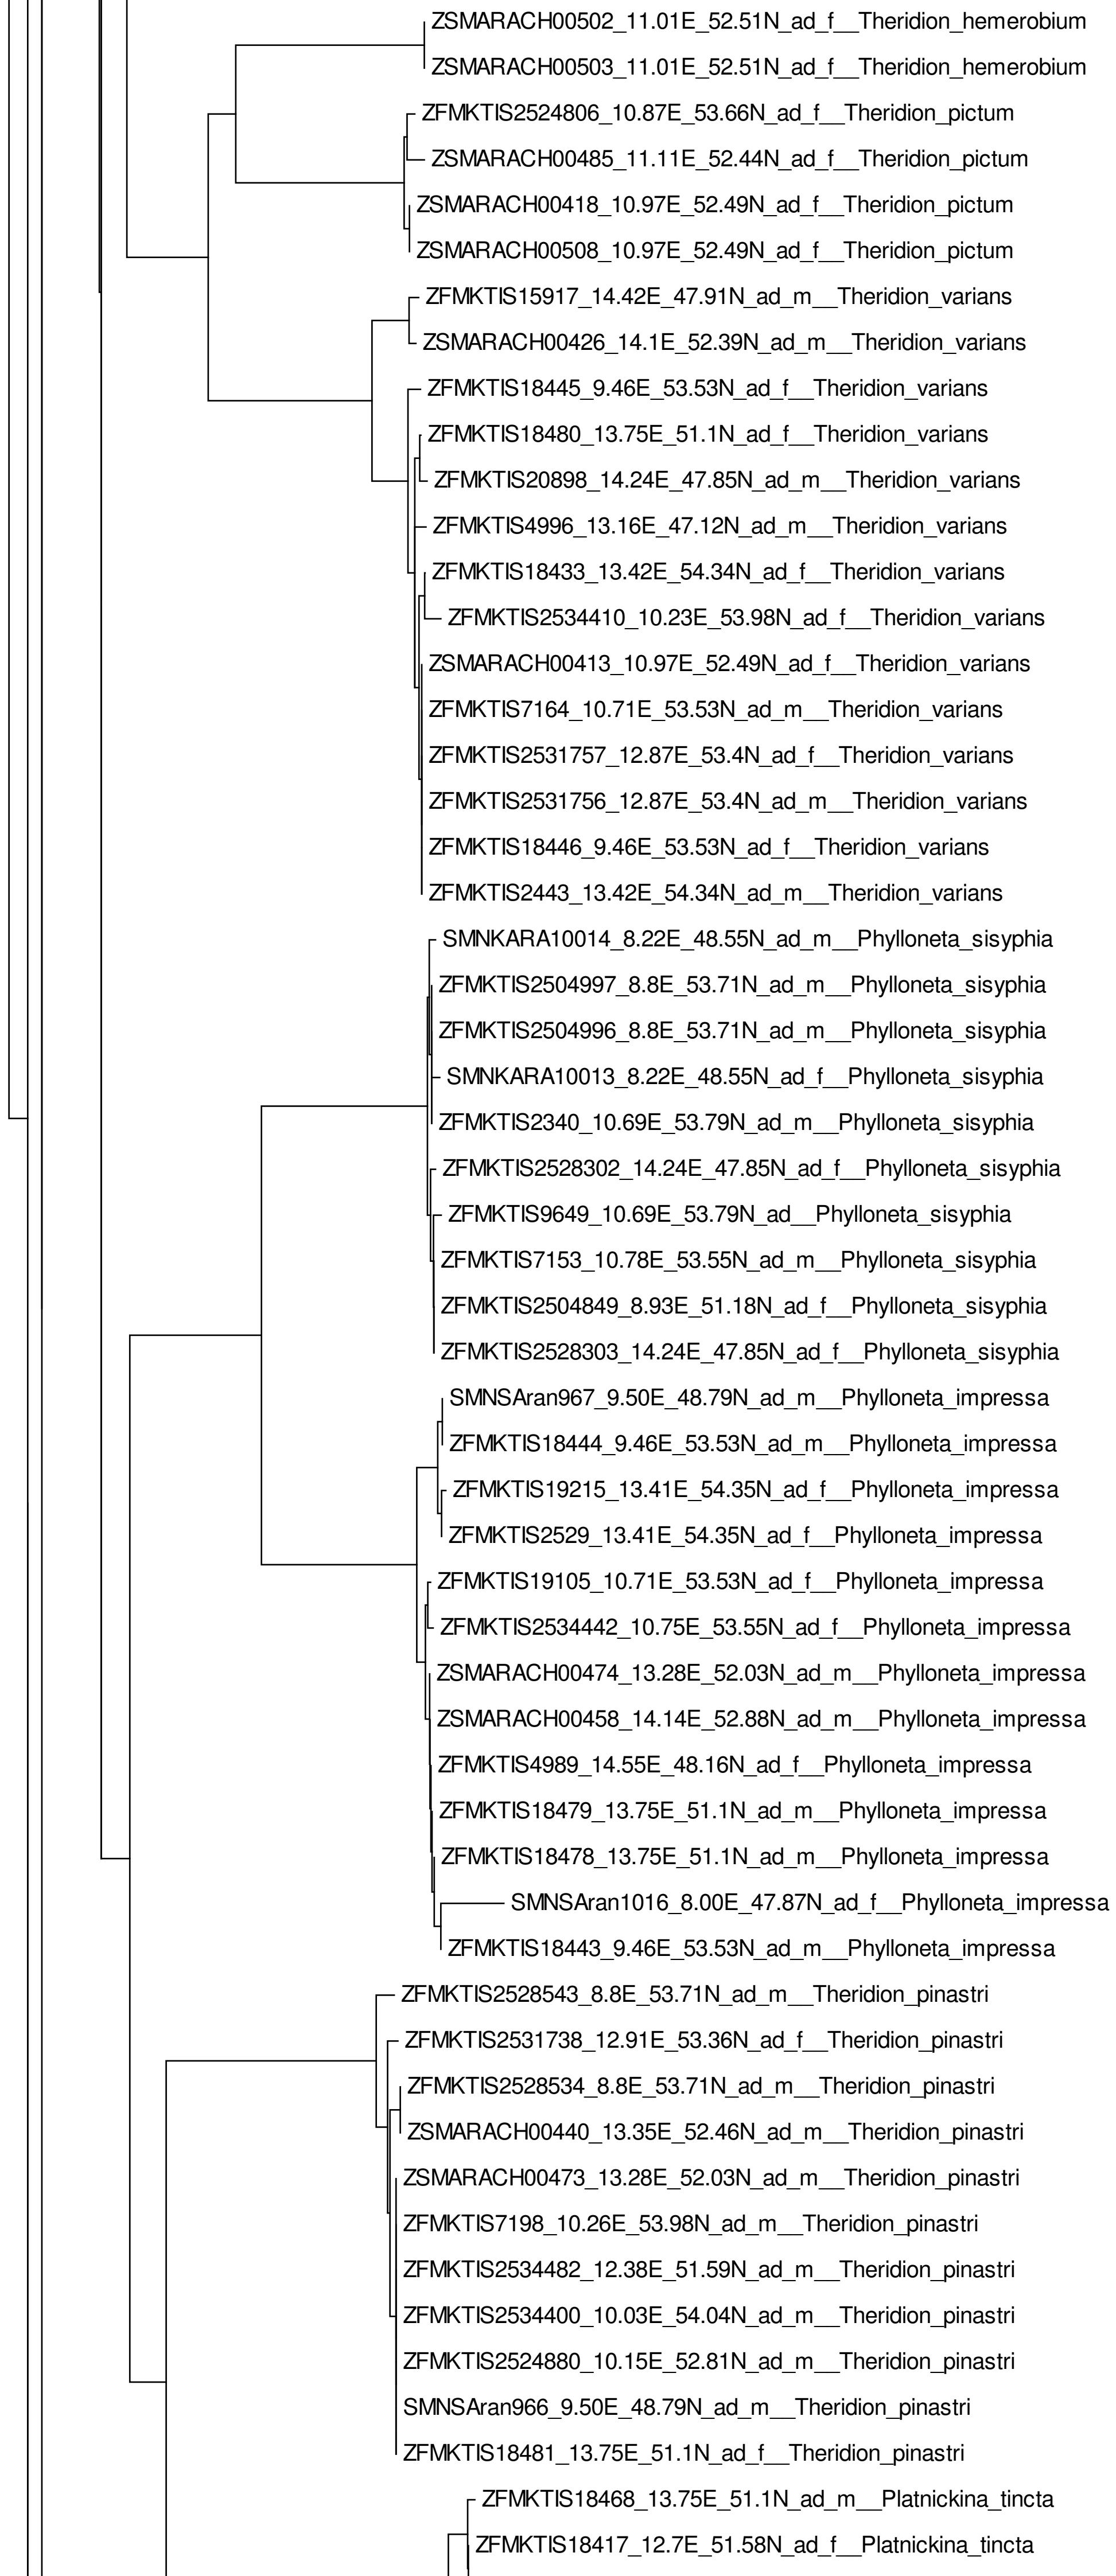

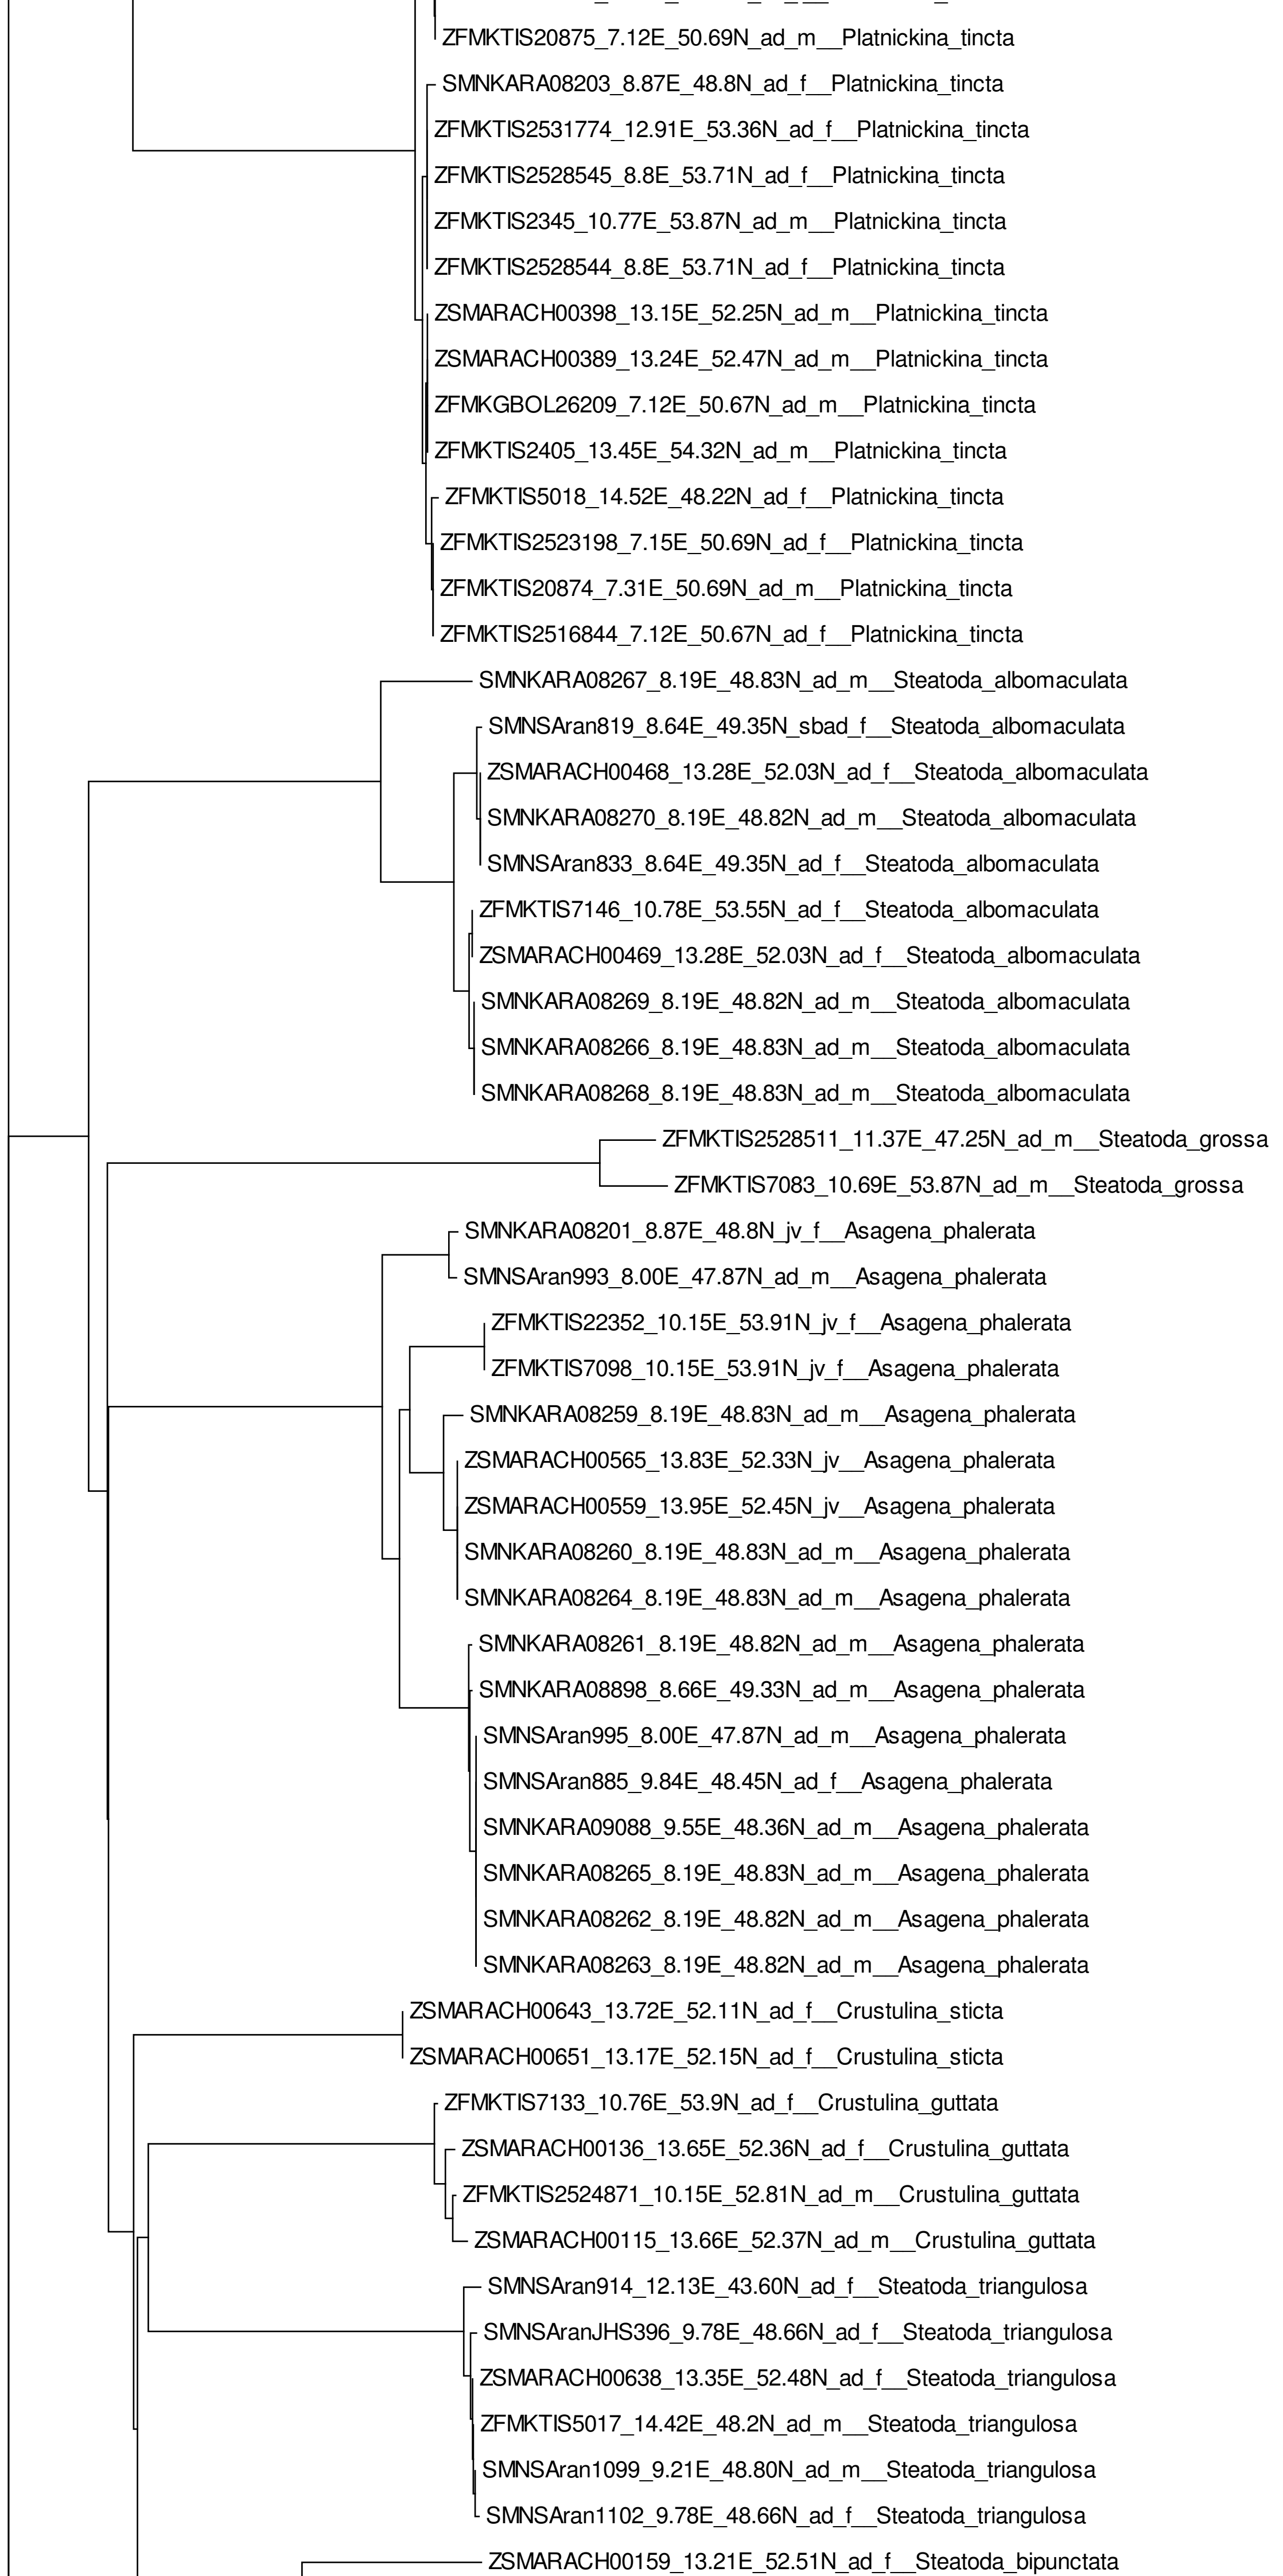



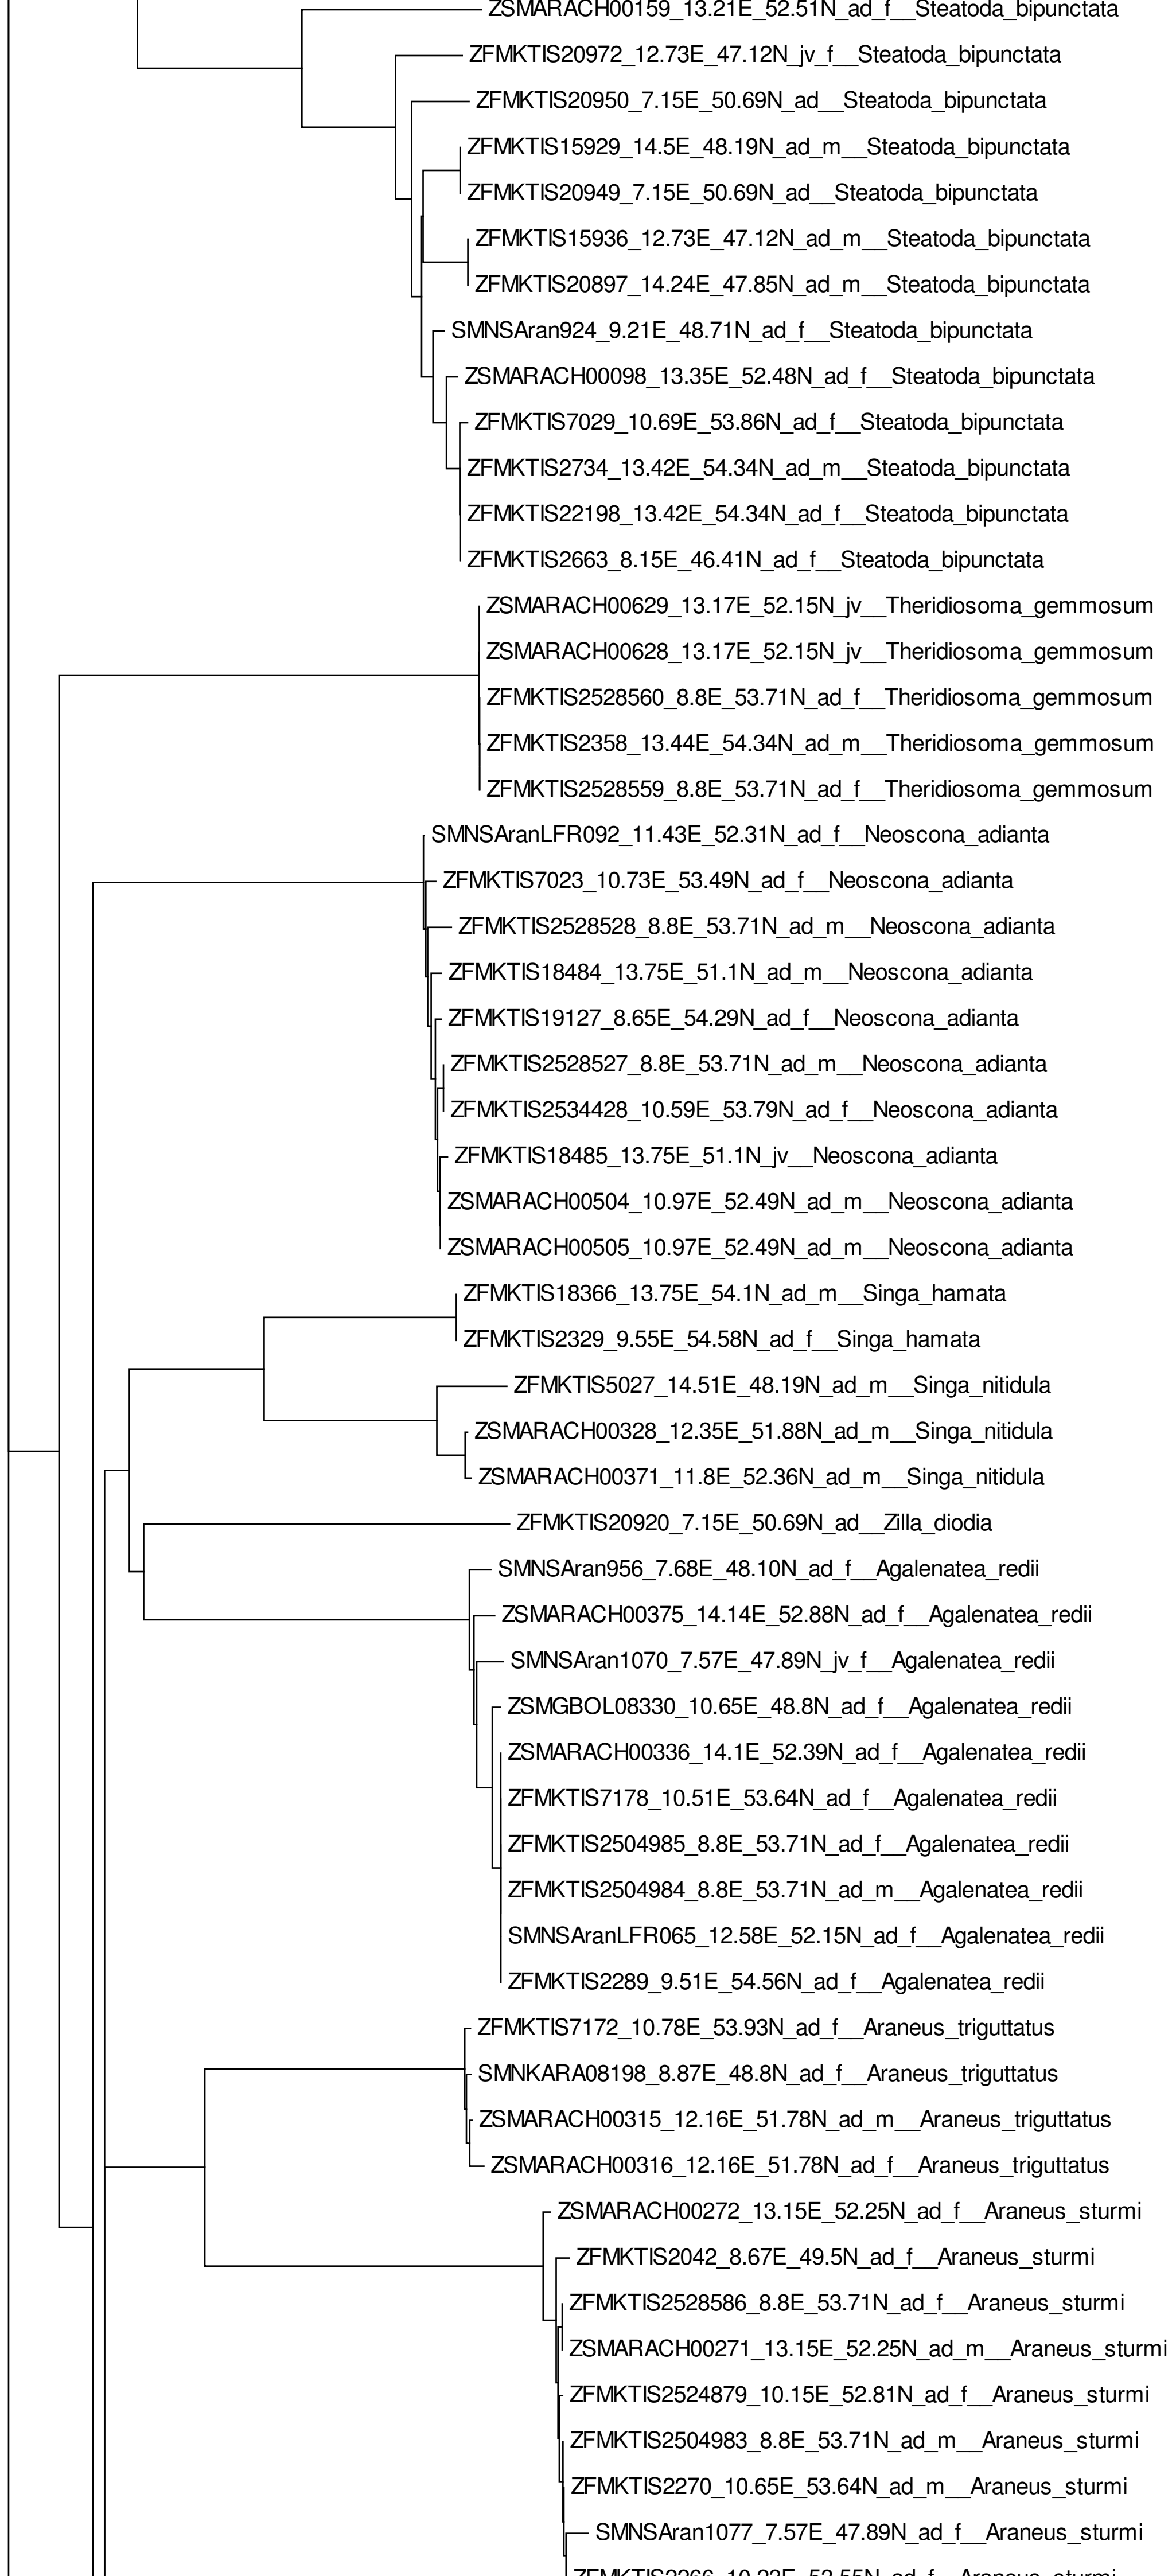

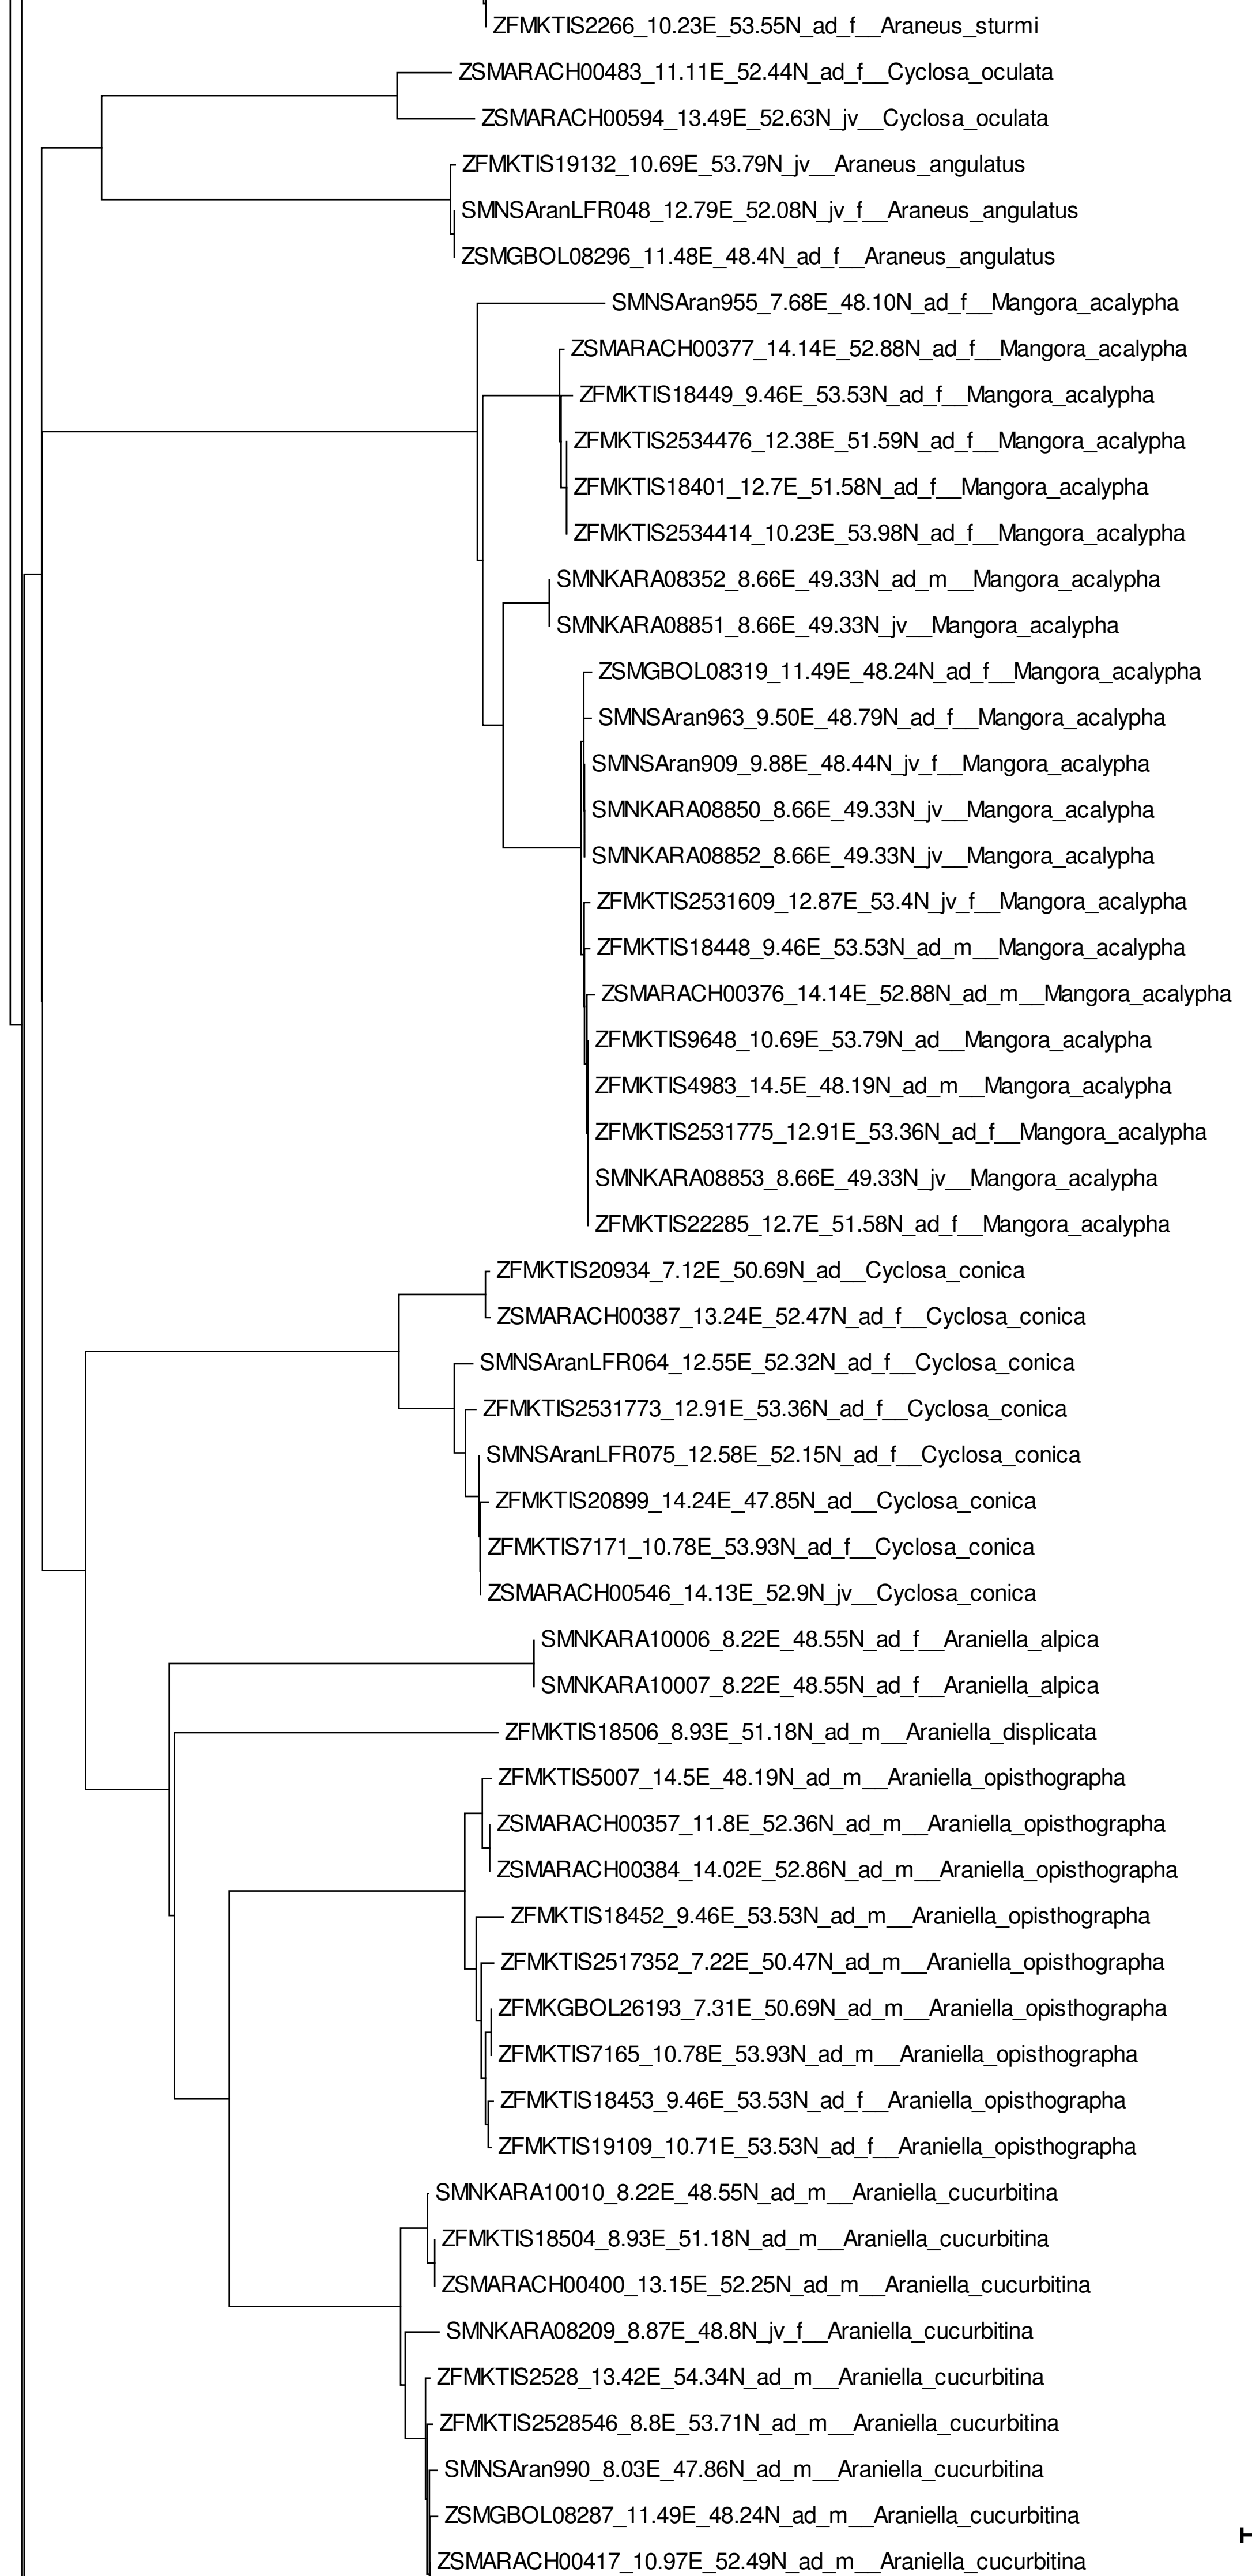



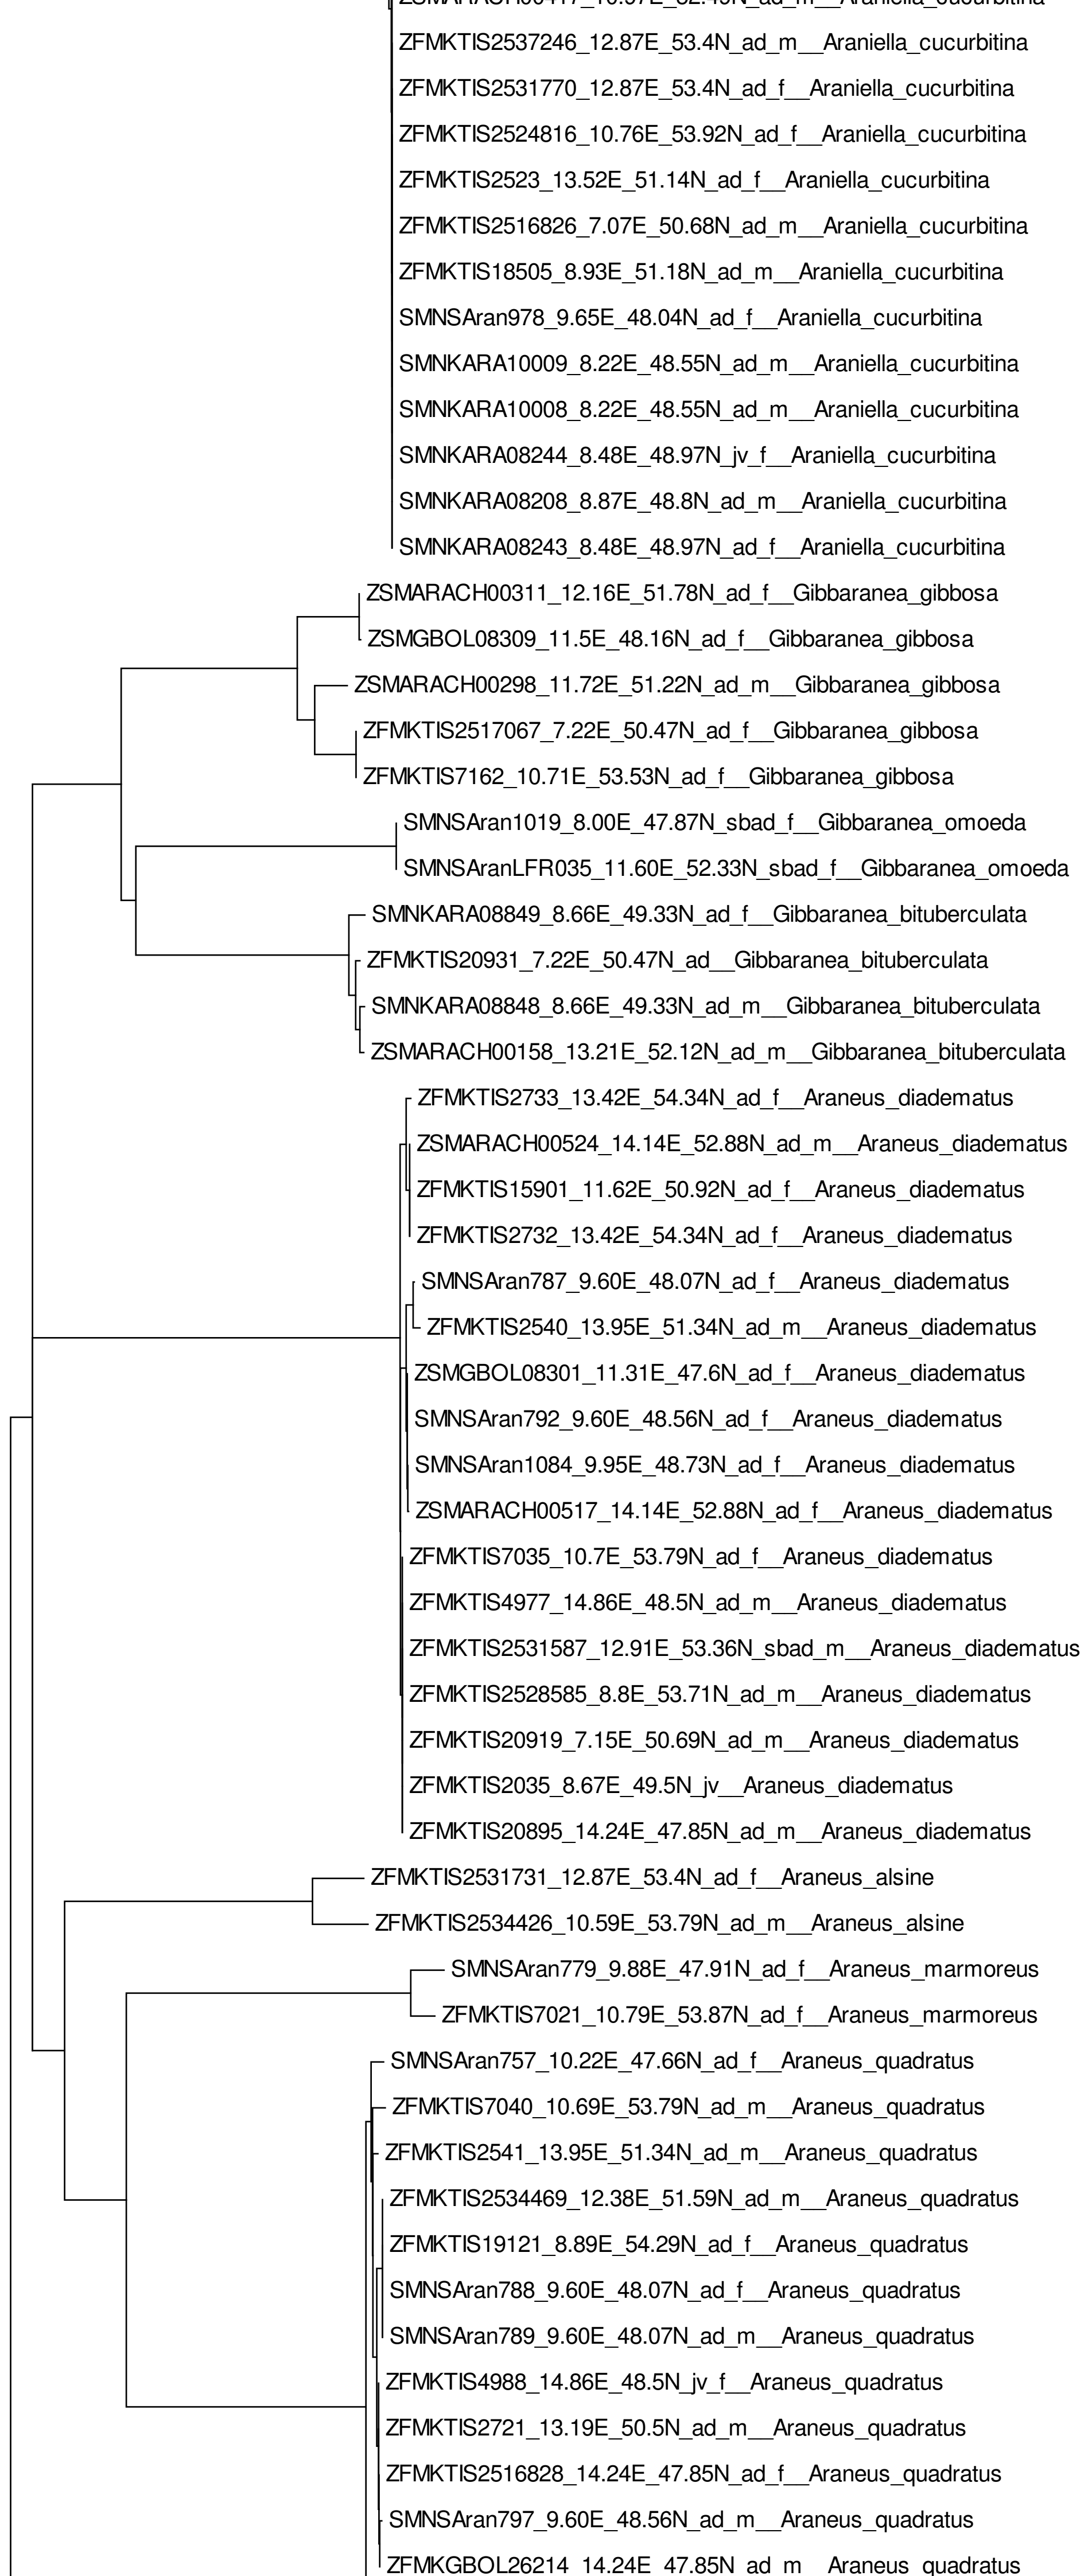

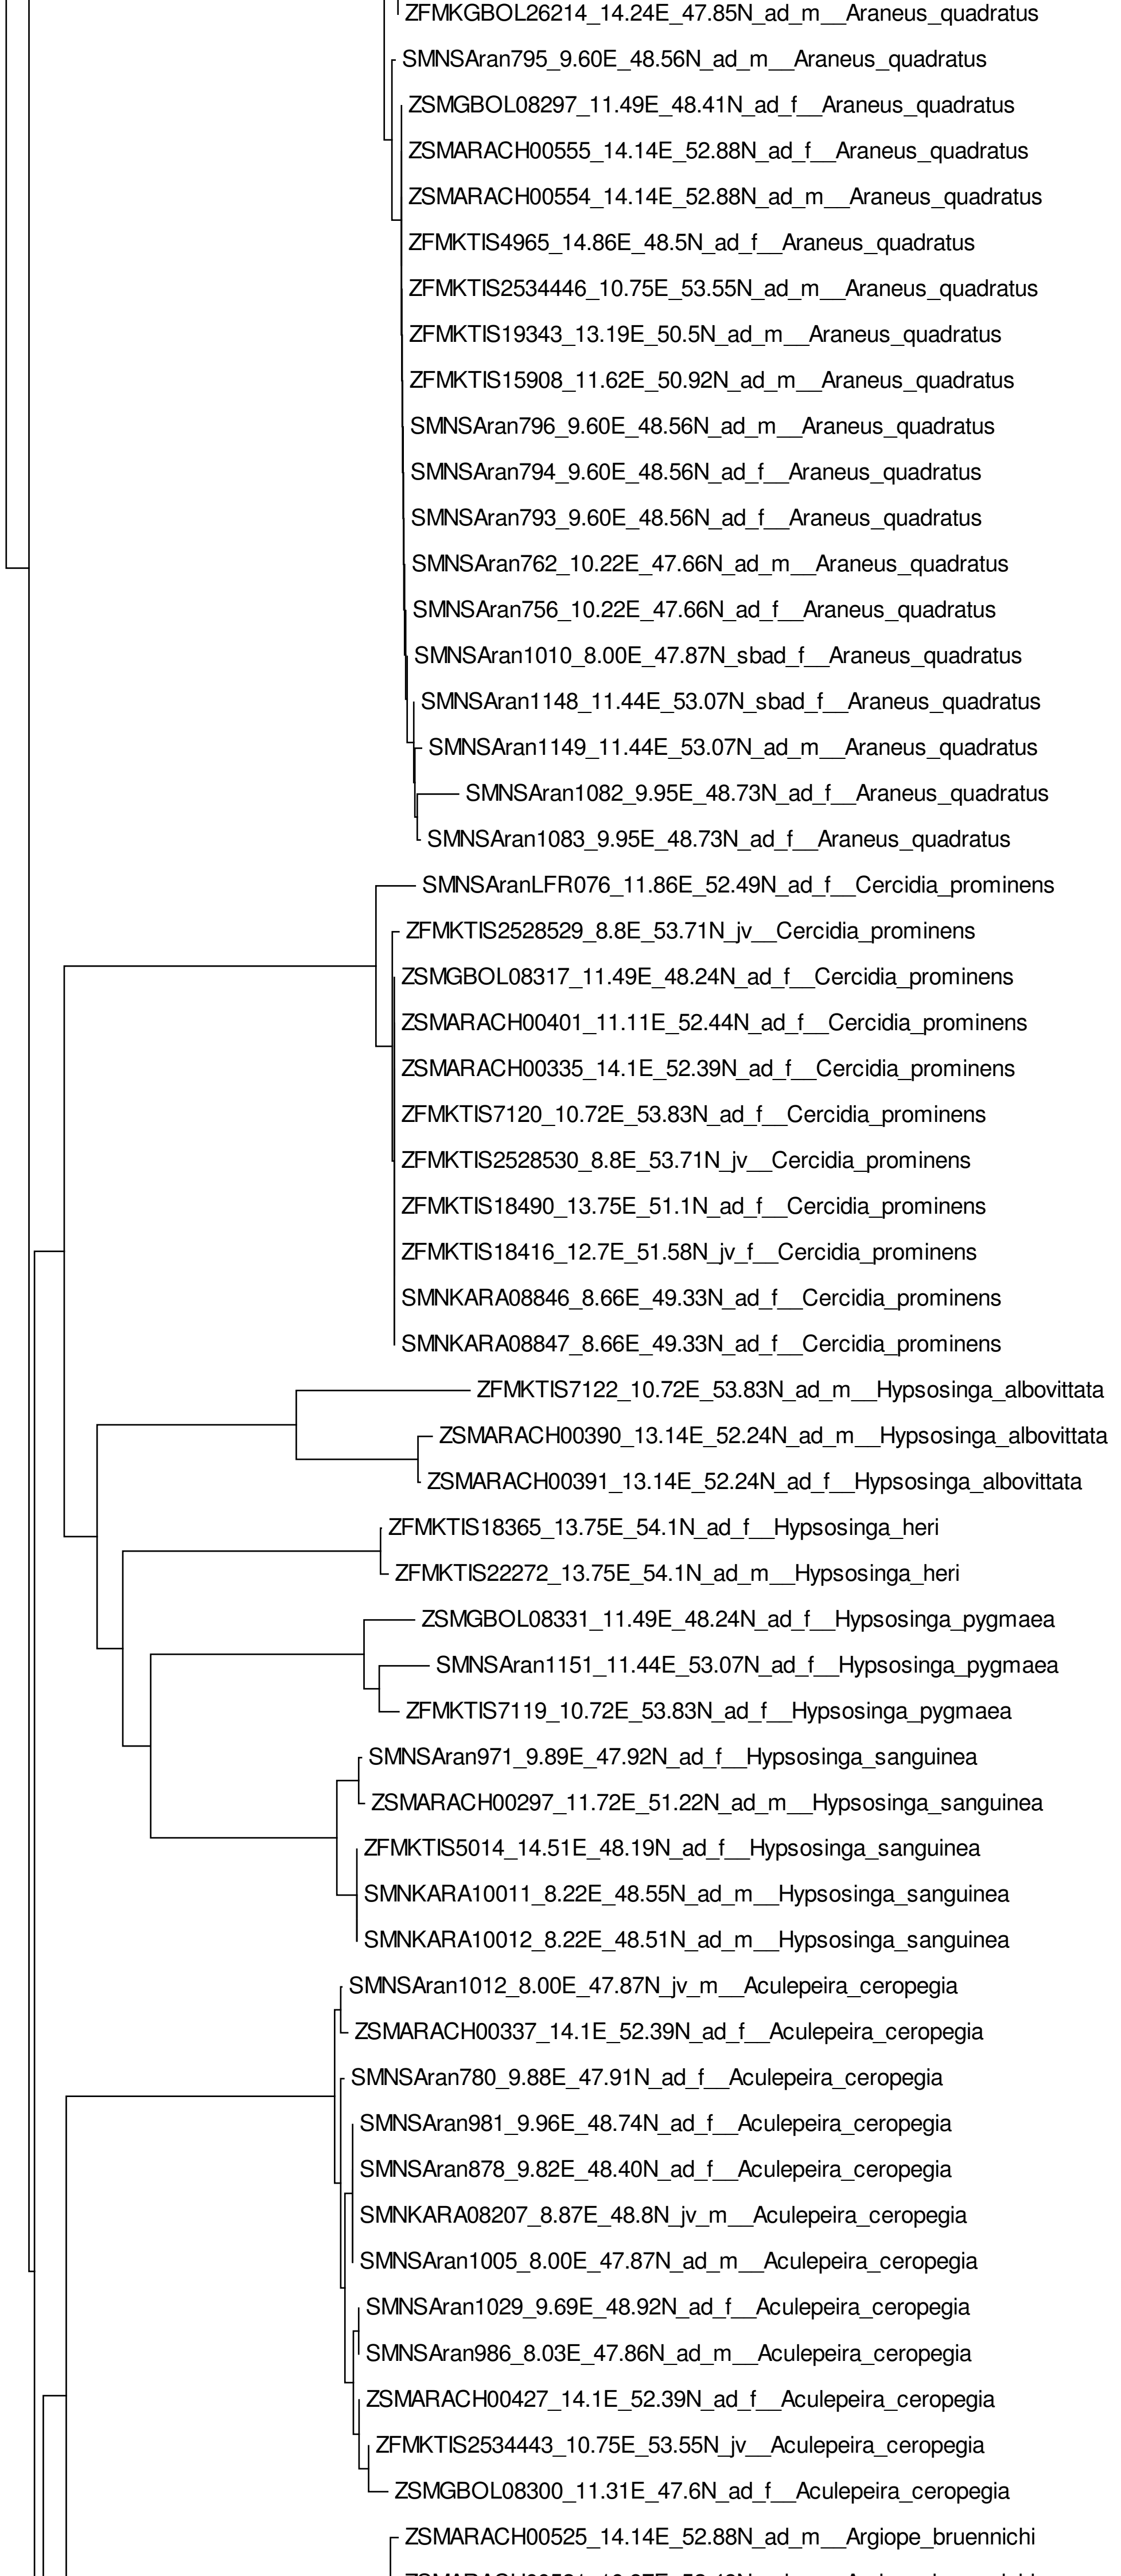



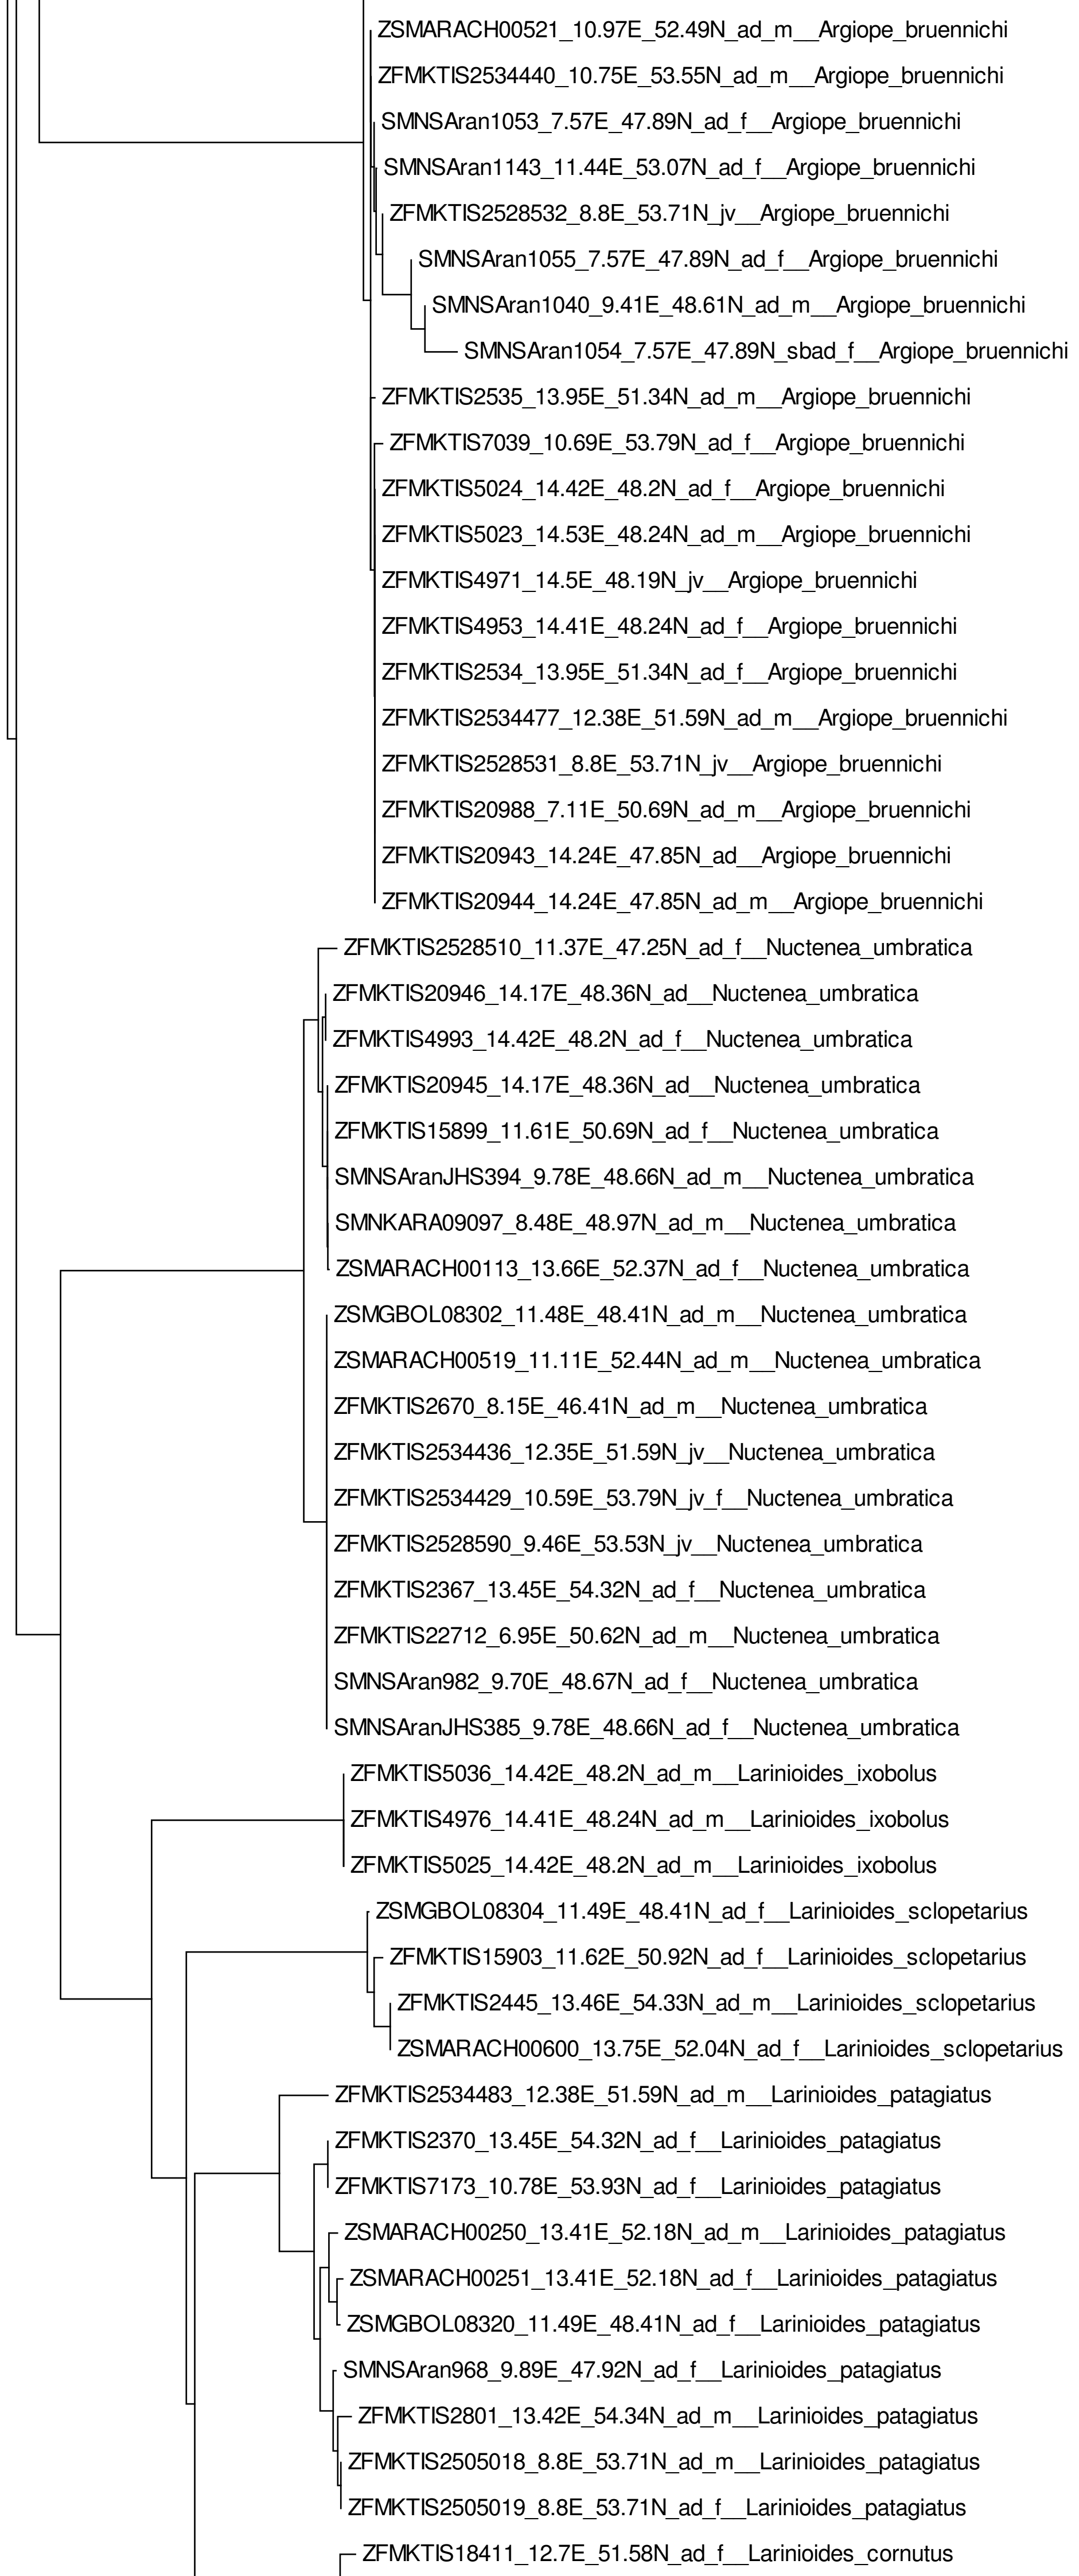

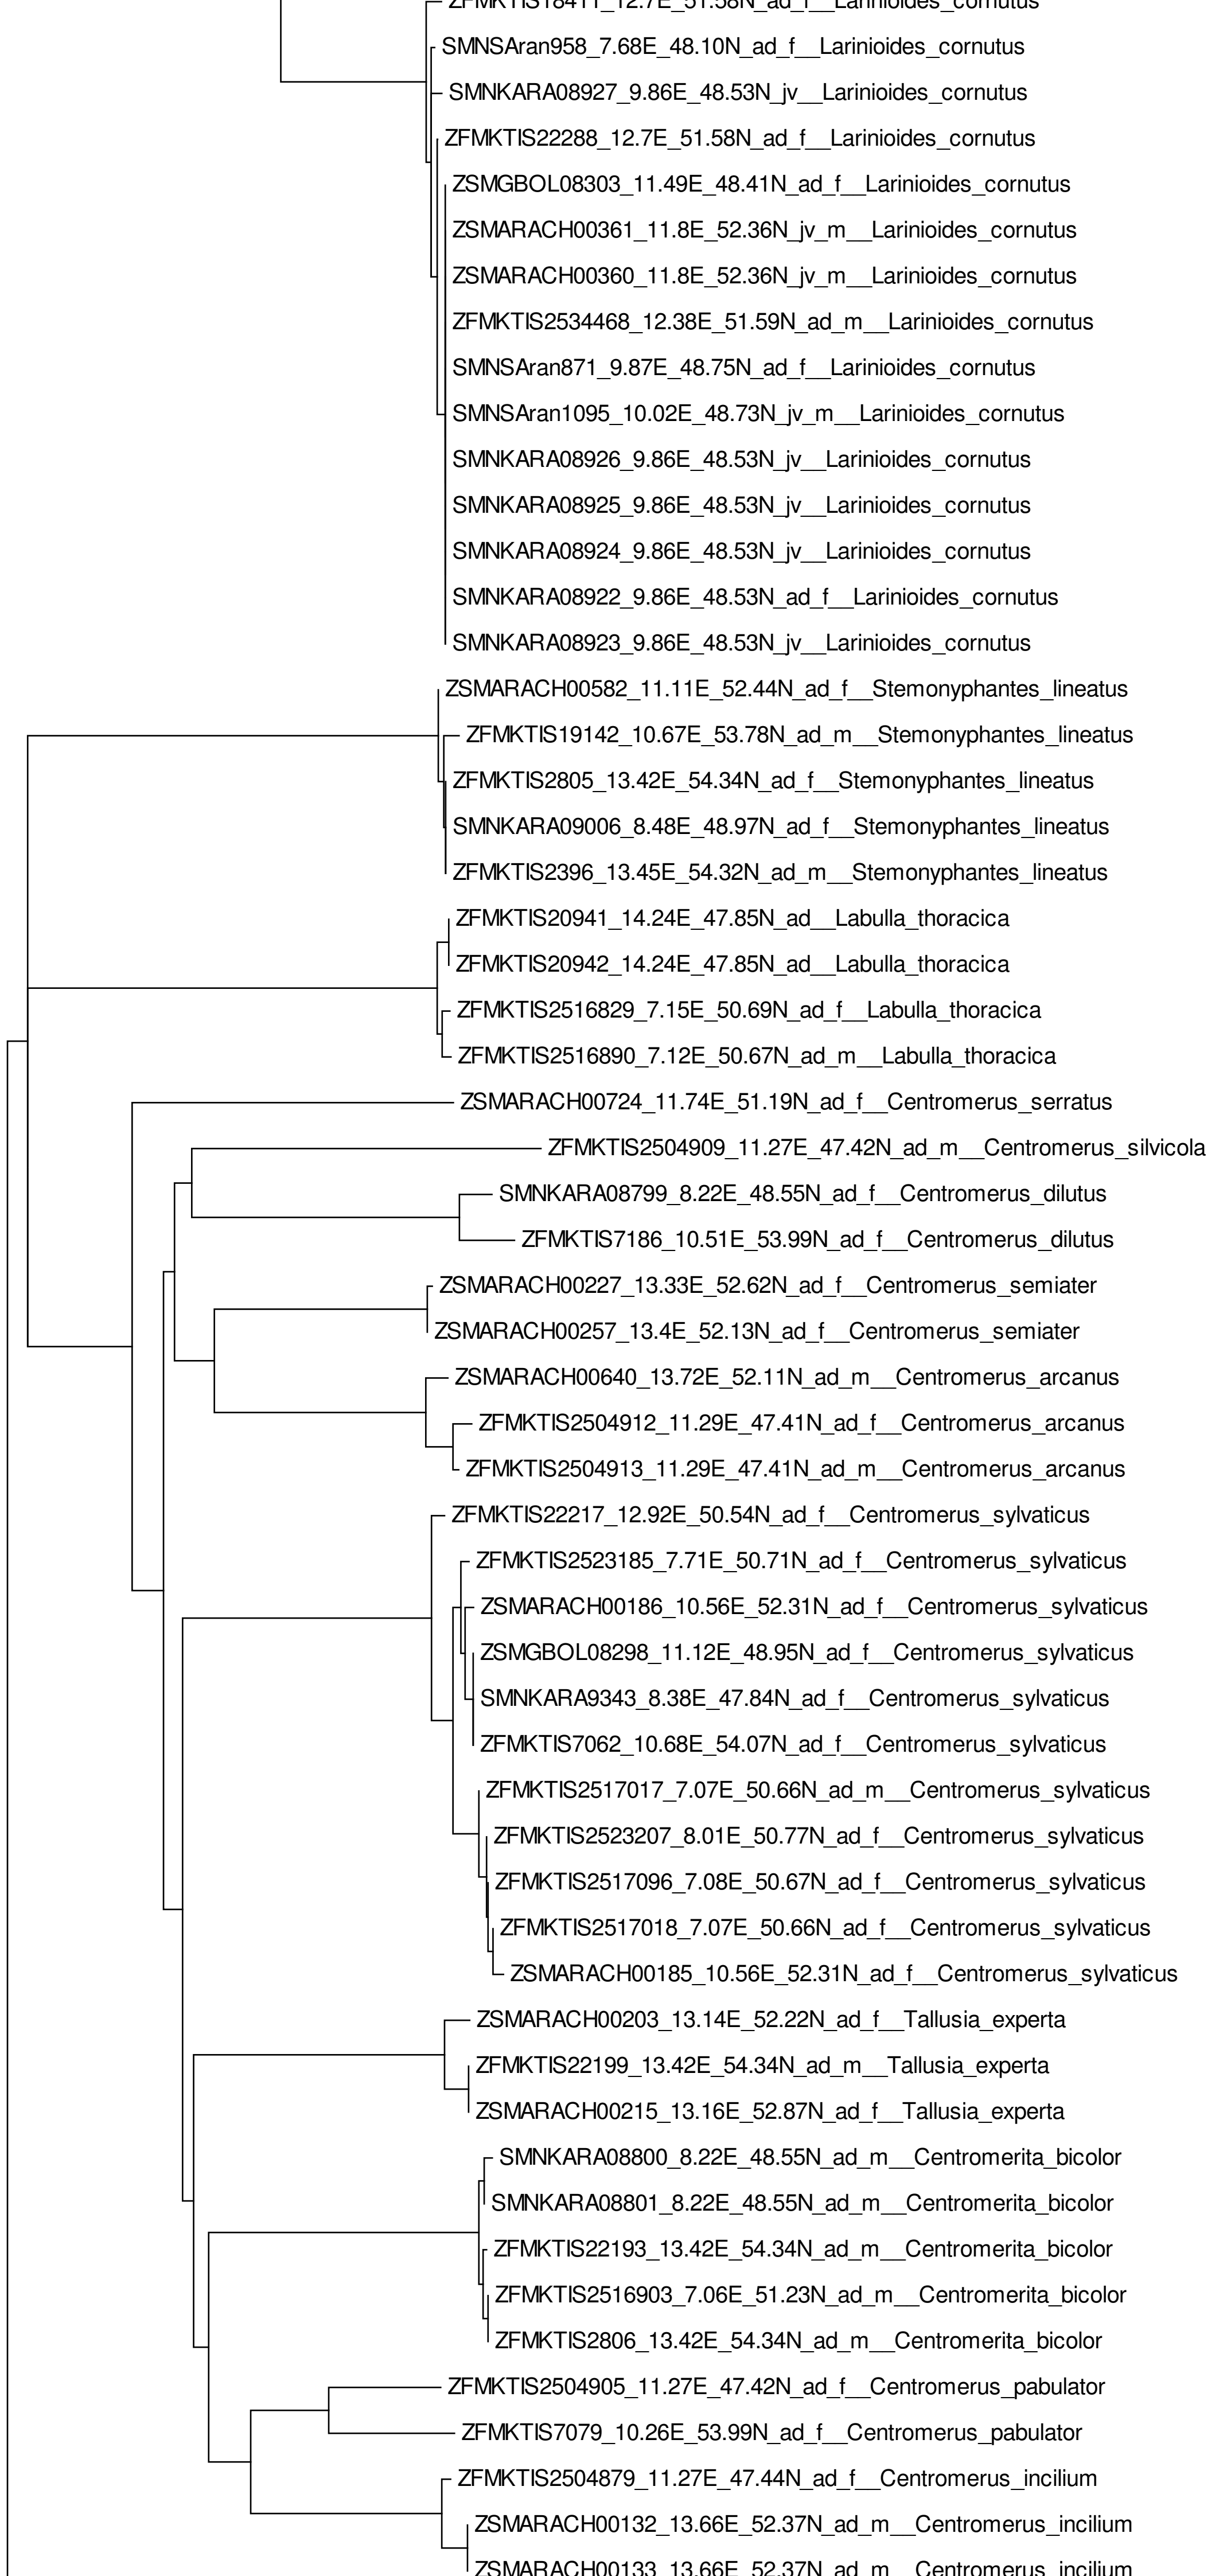

0.02



ZSMARACH00133\_13.66E\_52.37N\_ad\_m\_Centromerus\_incilium

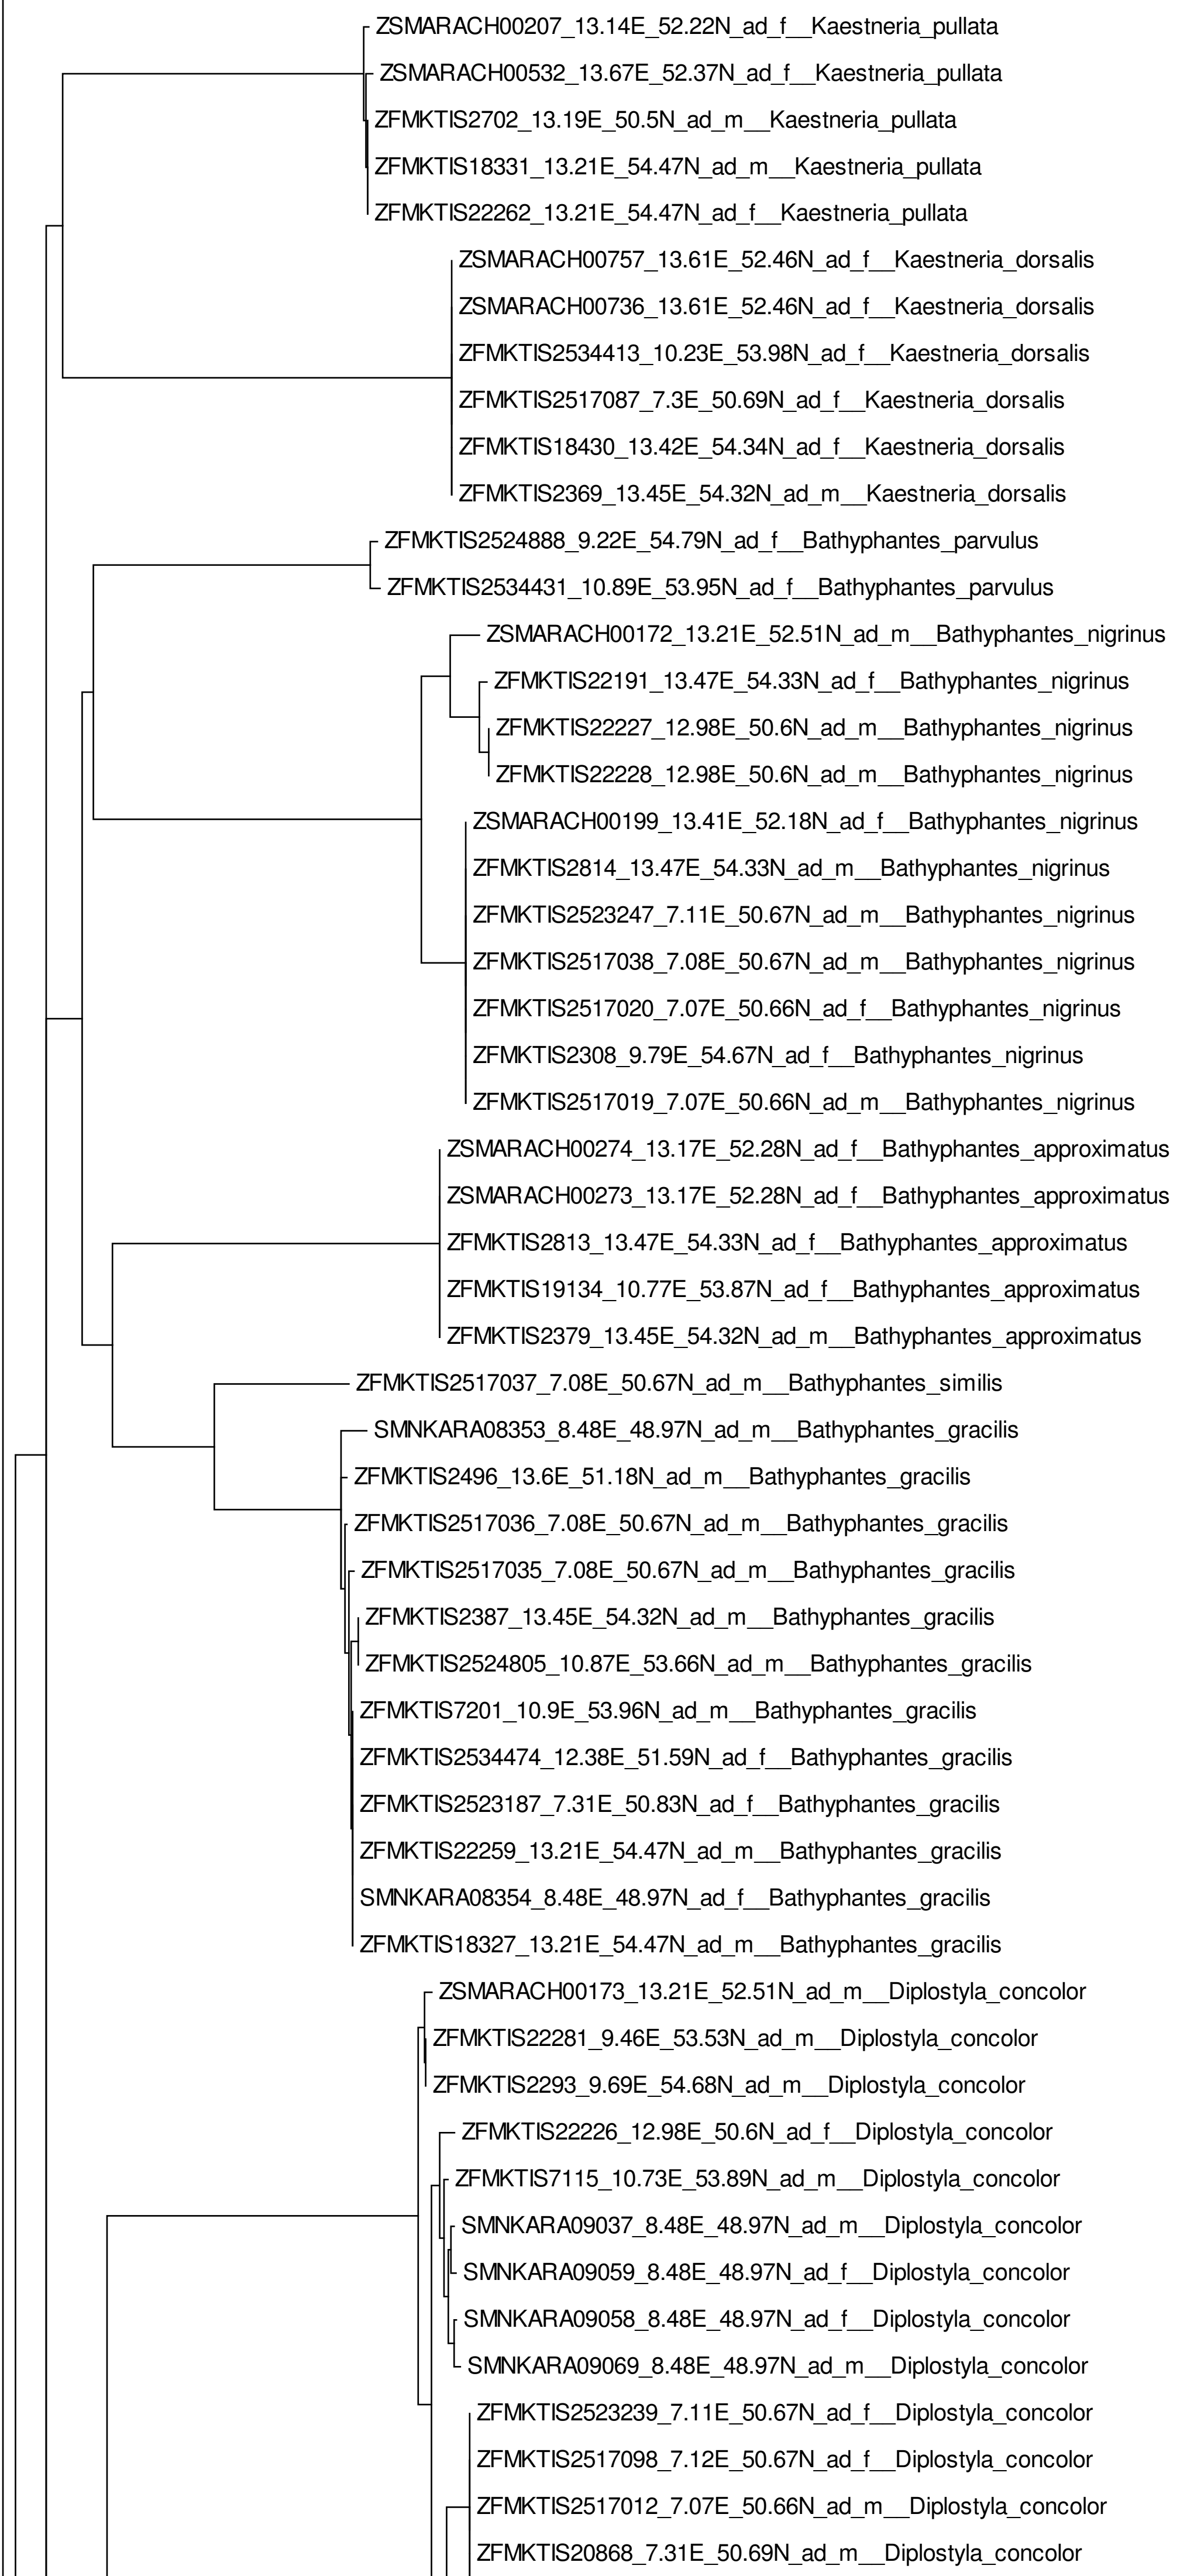

0.02

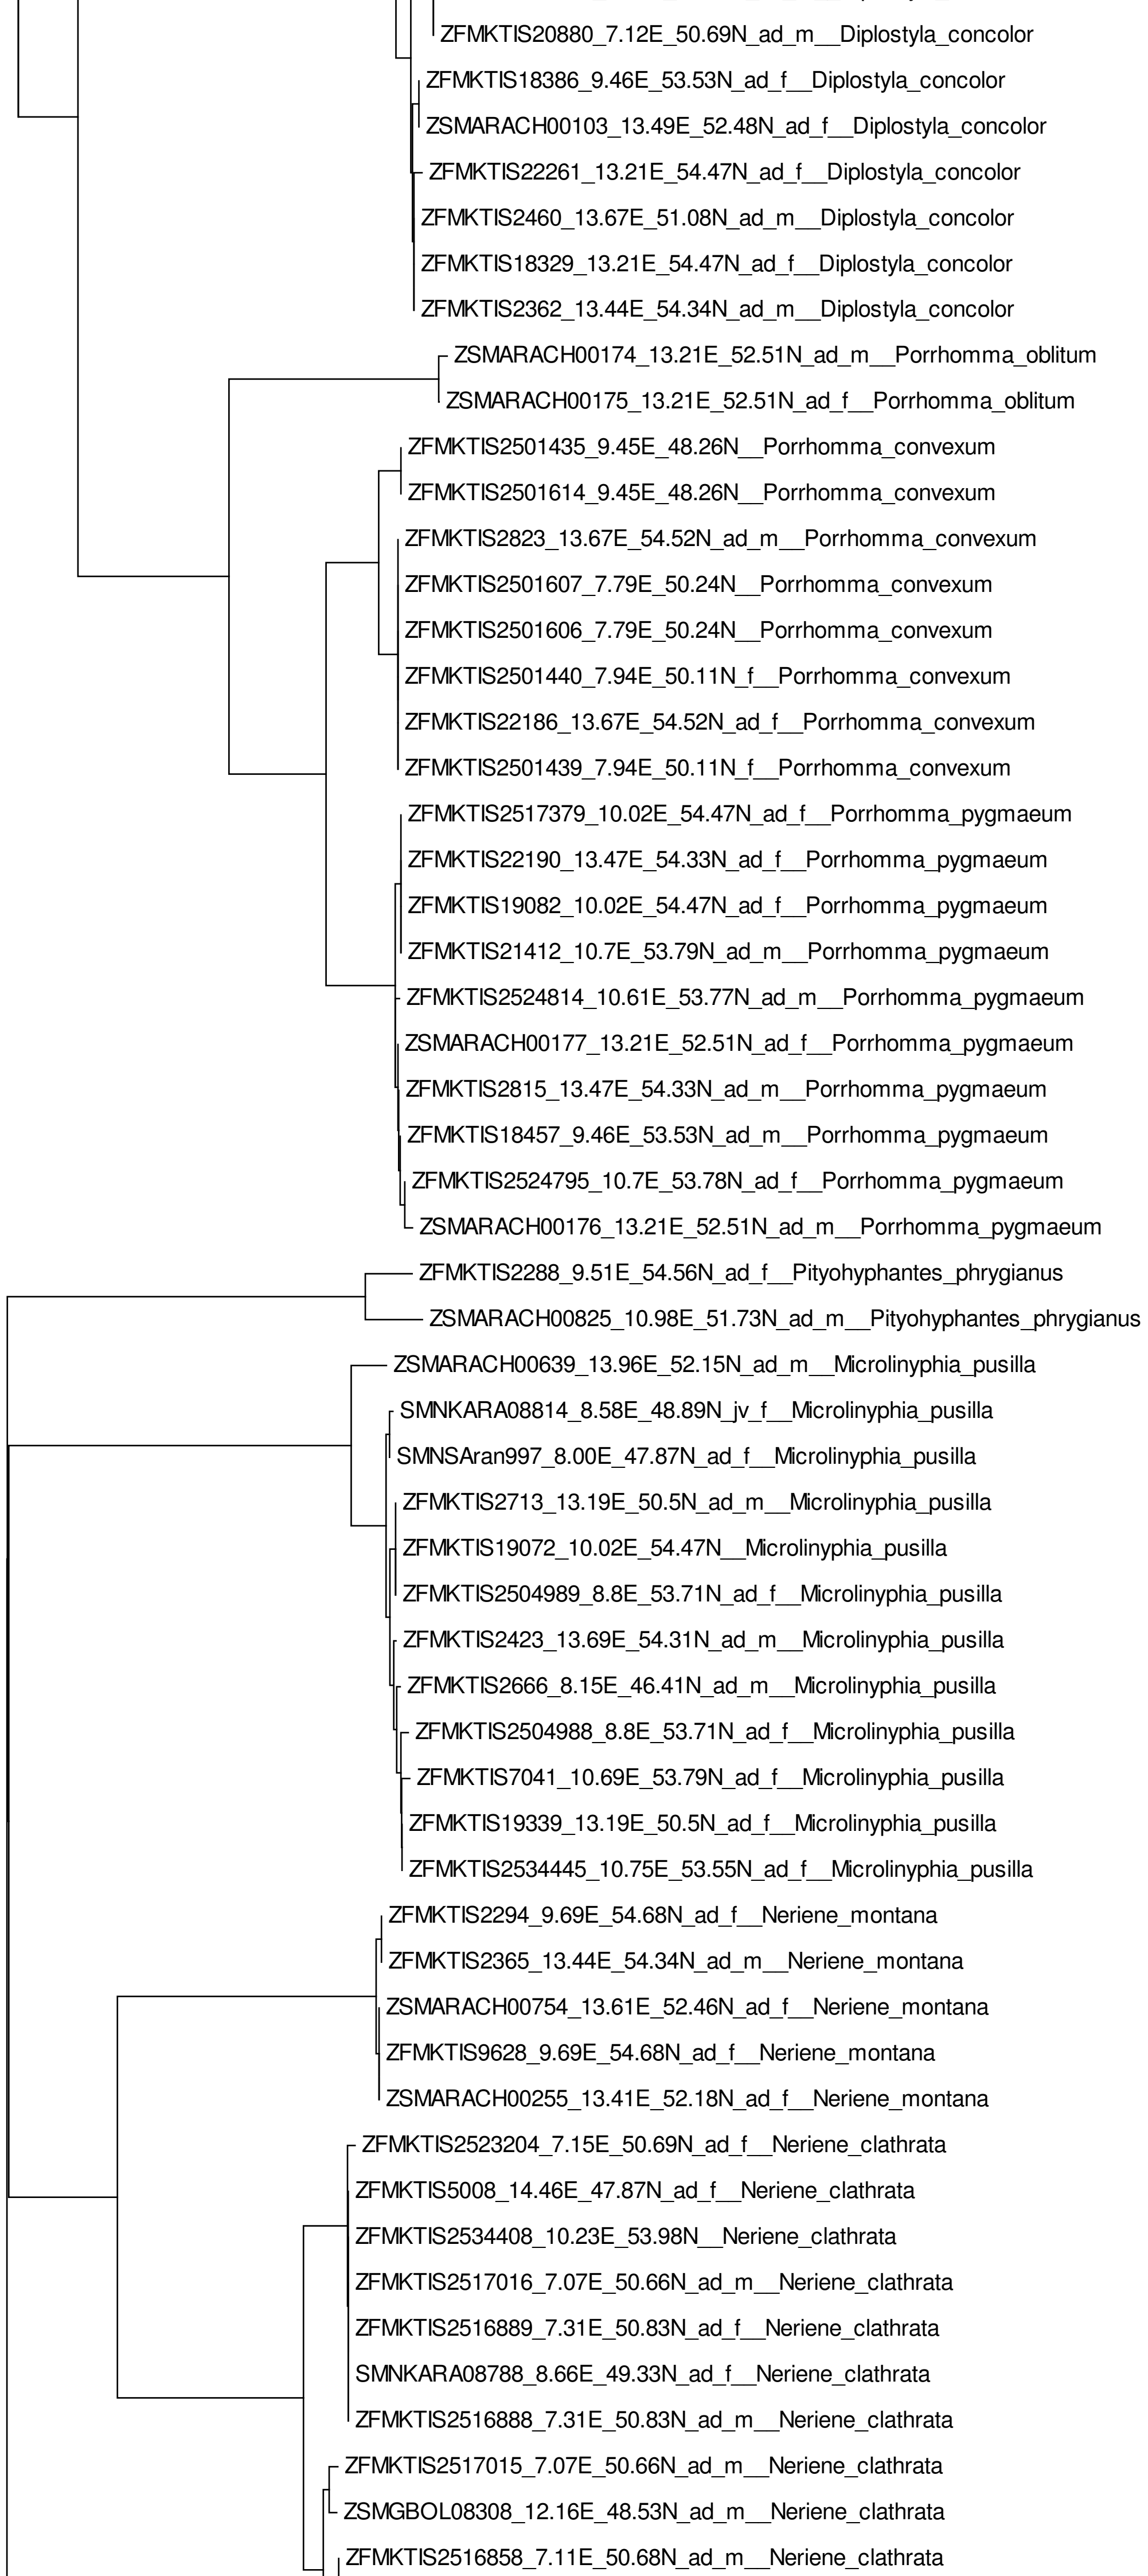



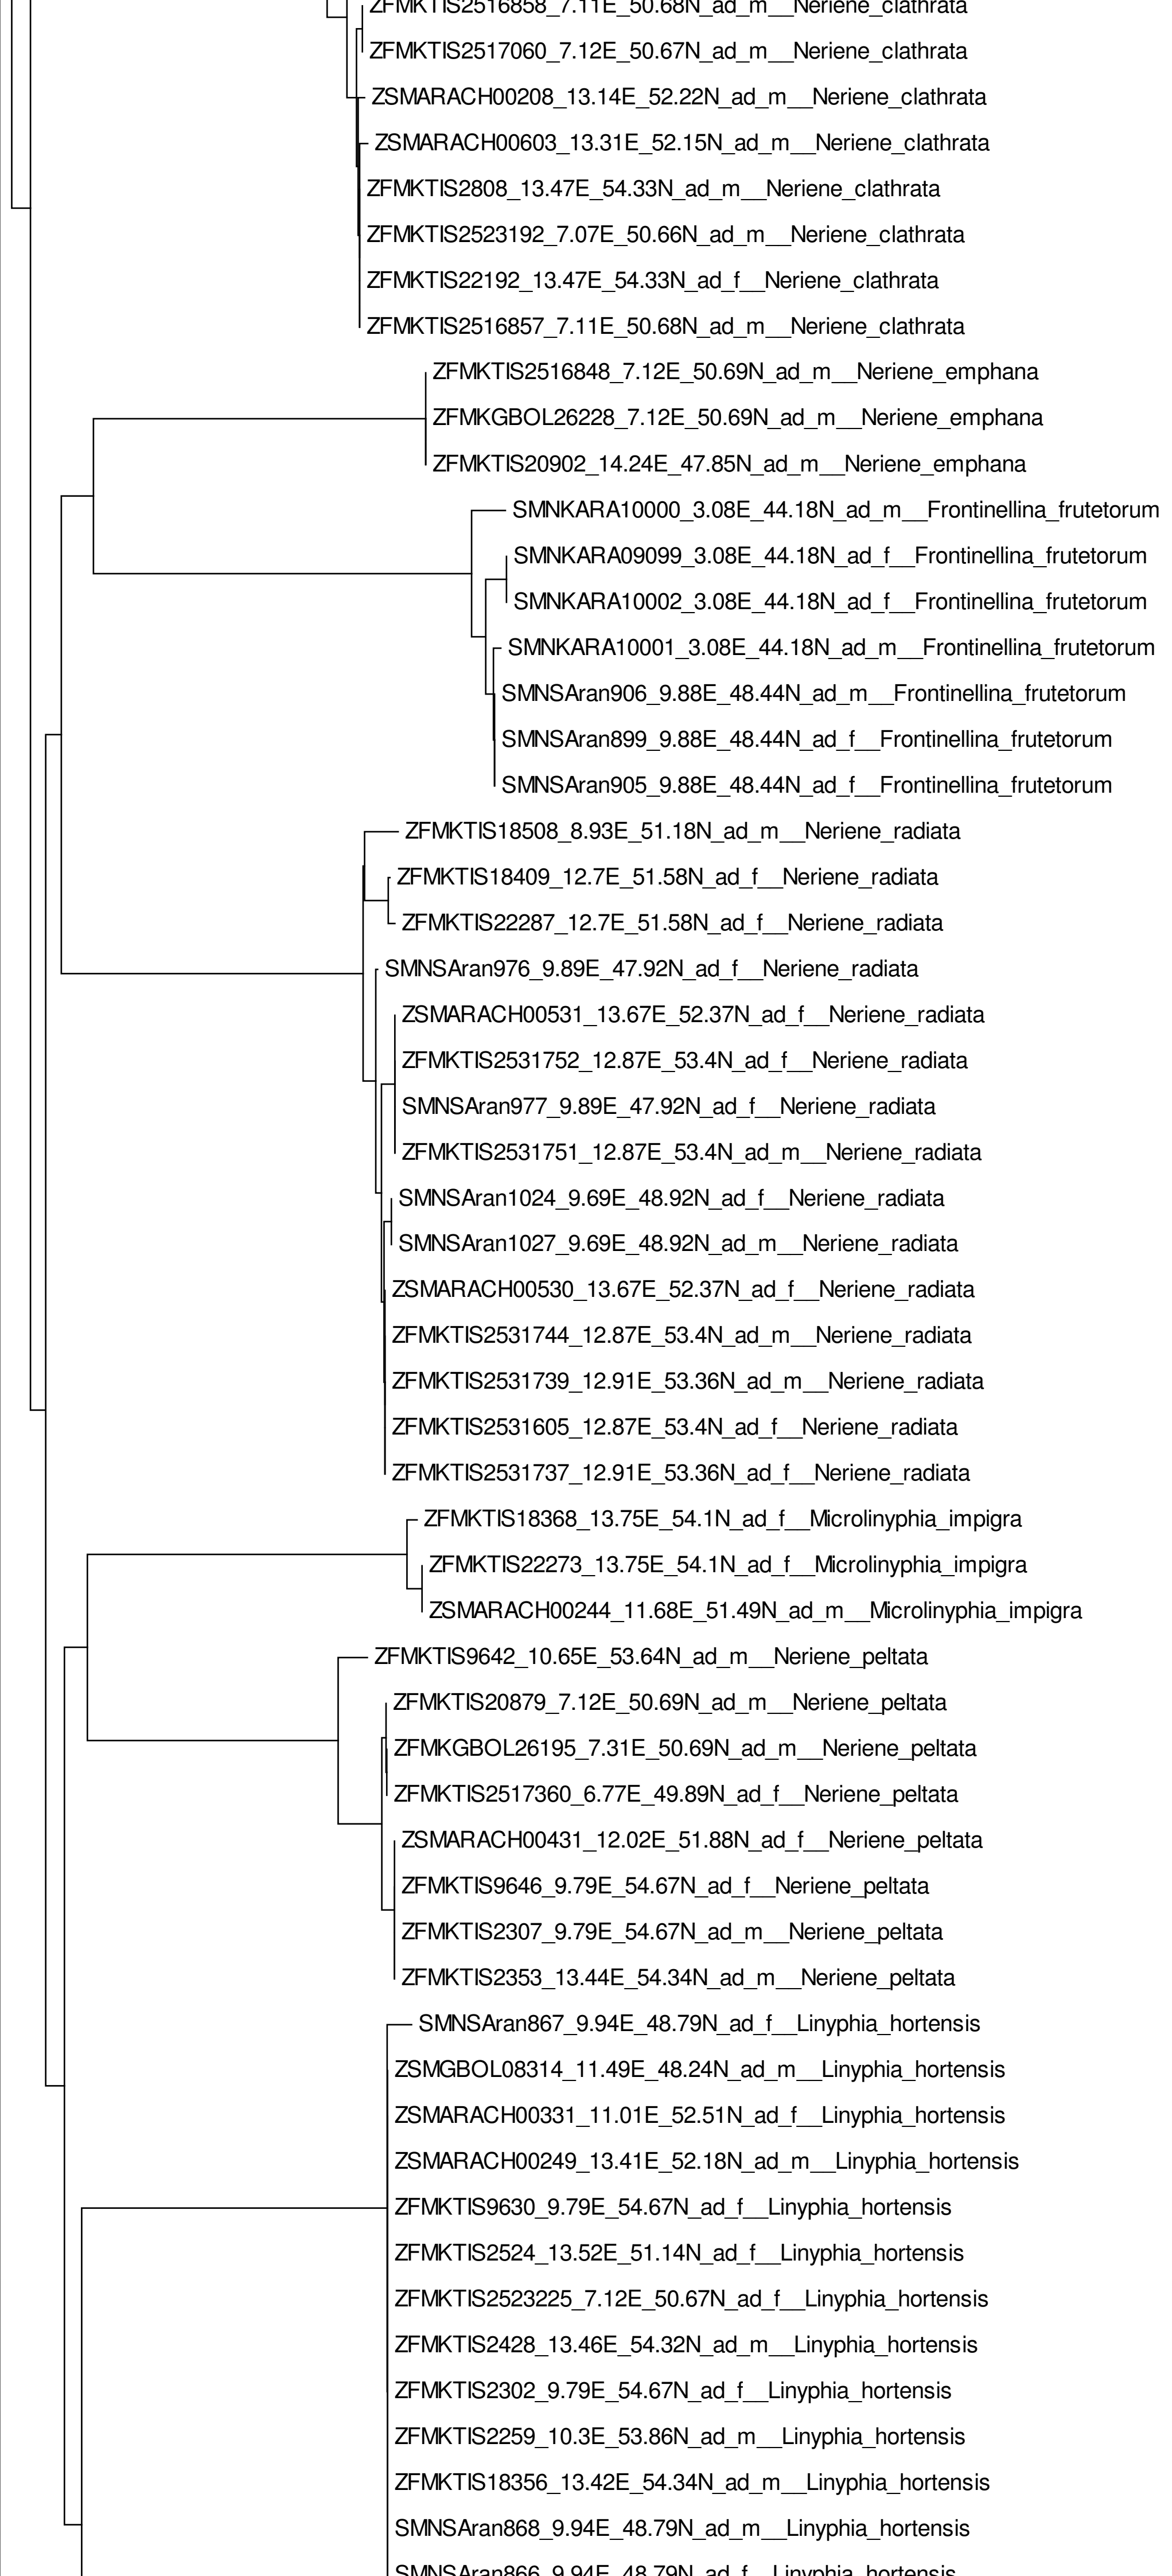

SMNSAran866\_9.94E\_48.79N\_ad\_f\_Linyphia\_hortensis  
 SMNSAran865\_9.94E\_48.79N\_ad\_m\_Linyphia\_hortensis  
 SMNSAran842\_8.64E\_49.35N\_ad\_f\_Linyphia\_hortensis  
 SMNSAran852\_9.94E\_48.79N\_ad\_m\_Linyphia\_hortensis  
 ZFMKTIS19122\_8.88E\_54.29N\_ad\_f\_Linyphia\_triangularis  
 ZFMKTIS22241\_12.24E\_51.35N\_ad\_f\_Linyphia\_triangularis  
 ZFMKTIS2537\_13.95E\_51.34N\_ad\_m\_Linyphia\_triangularis  
 ZFMKTIS20915\_7.15E\_50.69N\_ad\_m\_Linyphia\_triangularis  
 ZSMARACH00529\_13.67E\_52.37N\_ad\_m\_Linyphia\_triangularis  
 SMNSAran750\_10.26E\_47.66N\_sbada\_f\_Linyphia\_triangularis  
 ZFMKTIS2516875\_7.12E\_50.67N\_ad\_m\_Linyphia\_triangularis  
 ZFMKTIS4999\_14.57E\_48.06N\_ad\_m\_Linyphia\_triangularis  
 ZFMKTIS7022\_10.77E\_53.88N\_ad\_m\_Linyphia\_triangularis  
 ZFMKTIS2787\_12.24E\_51.35N\_ad\_f\_Linyphia\_triangularis  
 ZFMKTIS2534457\_12.38E\_51.59N\_ad\_m\_Linyphia\_triangularis  
 ZFMKTIS2528582\_8.8E\_53.71N\_ad\_m\_Linyphia\_triangularis  
 ZFMKTIS20954\_14.24E\_47.85N\_ad\_m\_Linyphia\_triangularis  
 SMNSAran1142\_11.44E\_53.07N\_ad\_m\_Linyphia\_triangularis  
 SMNSAran1141\_11.44E\_53.07N\_ad\_f\_Linyphia\_triangularis  
 SMNSAran1096\_10.02E\_48.73N\_ad\_f\_Linyphia\_triangularis  
 SMNSAran1140\_11.44E\_53.07N\_sbada\_f\_Linyphia\_triangularis  
 SMNSAran754\_10.22E\_47.66N\_ad\_f\_Linyphia\_triangularis  
 ZSMARACH00528\_13.67E\_52.37N\_ad\_m\_Linyphia\_triangularis  
 ZFMKTIS20978\_7.15E\_50.69N\_ad\_m\_Linyphia\_triangularis  
 ZFMKTIS20953\_14.24E\_47.85N\_ad\_m\_Linyphia\_triangularis  
 ZFMKTIS19216\_13.95E\_51.34N\_ad\_m\_Linyphia\_triangularis  
 ZFMKTIS15905\_11.62E\_50.92N\_ad\_f\_Linyphia\_triangularis  
 SMNSAran803\_9.60E\_48.56N\_ad\_f\_Linyphia\_triangularis  
 SMNSAran783\_9.88E\_47.91N\_ad\_m\_Linyphia\_triangularis  
 SMNSAran741\_10.26E\_47.66N\_ad\_f\_Linyphia\_triangularis  
 SMNSAran749\_10.26E\_47.66N\_ad\_m\_Linyphia\_triangularis  
 SMNSAran916\_12.13E\_43.60N\_ad\_m\_Pimonia\_breuillei  
 ZFMKTIS2502526\_6.13E\_49.61N\_Nesticus\_cellulanus  
 ZFMKTIS2502527\_6.13E\_49.61N\_Nesticus\_cellulanus  
 ZFMKTIS2502009\_6.1E\_49.72N\_Nesticus\_cellulanus  
 ZFMKTIS2502510\_7.04E\_49.25N\_Nesticus\_cellulanus  
 ZFMKTIS2502514\_6.44E\_49.51N\_Nesticus\_cellulanus  
 ZFMKTIS2502522\_6.74E\_49.4N\_Nesticus\_cellulanus  
 ZFMKTIS2502521\_6.96E\_49.24N\_Nesticus\_cellulanus  
 ZFMKTIS2502520\_6.44E\_49.51N\_Nesticus\_cellulanus  
 ZFMKTIS2502519\_7.11E\_49.24N\_Nesticus\_cellulanus  
 ZFMKTIS2502518\_6.67E\_49.38N\_Nesticus\_cellulanus  
 ZFMKTIS2502517\_8.12E\_49.36N\_Nesticus\_cellulanus  
 ZFMKTIS2502516\_8.0E\_49.22N\_Nesticus\_cellulanus  
 ZFMKTIS2502515\_6.69E\_49.34N\_Nesticus\_cellulanus  
 ZFMKTIS2502513\_7.31E\_49.29N\_Nesticus\_cellulanus  
 ZFMKTIS2502512\_7.25E\_49.18N\_Nesticus\_cellulanus  
 ZFMKTIS2501991\_6.1E\_49.72N\_Nesticus\_cellulanus  
 ZFMKTIS2501988\_6.1E\_49.72N\_Nesticus\_cellulanus  
 ZFMKTIS2407\_13.45E\_54.32N\_ad\_f\_Nesticus\_cellulanus  
 ZFMKTIS21381\_7.12E\_49.24N\_Nesticus\_cellulanus  
 ZFMKTIS21366\_5.98E\_50.1N\_Nesticus\_cellulanus  
 ZFMKTIS21364\_5.98E\_50.1N\_Nesticus\_cellulanus  
 ZFMKTIS21352\_5.98E\_50.1N\_Nesticus\_cellulanus  
 ZFMKTIS21349\_6.54E\_49.41N\_Nesticus\_cellulanus  
 ZFMKTIS20896\_14.24E\_47.85N\_ad\_Nesticus\_cellulanus



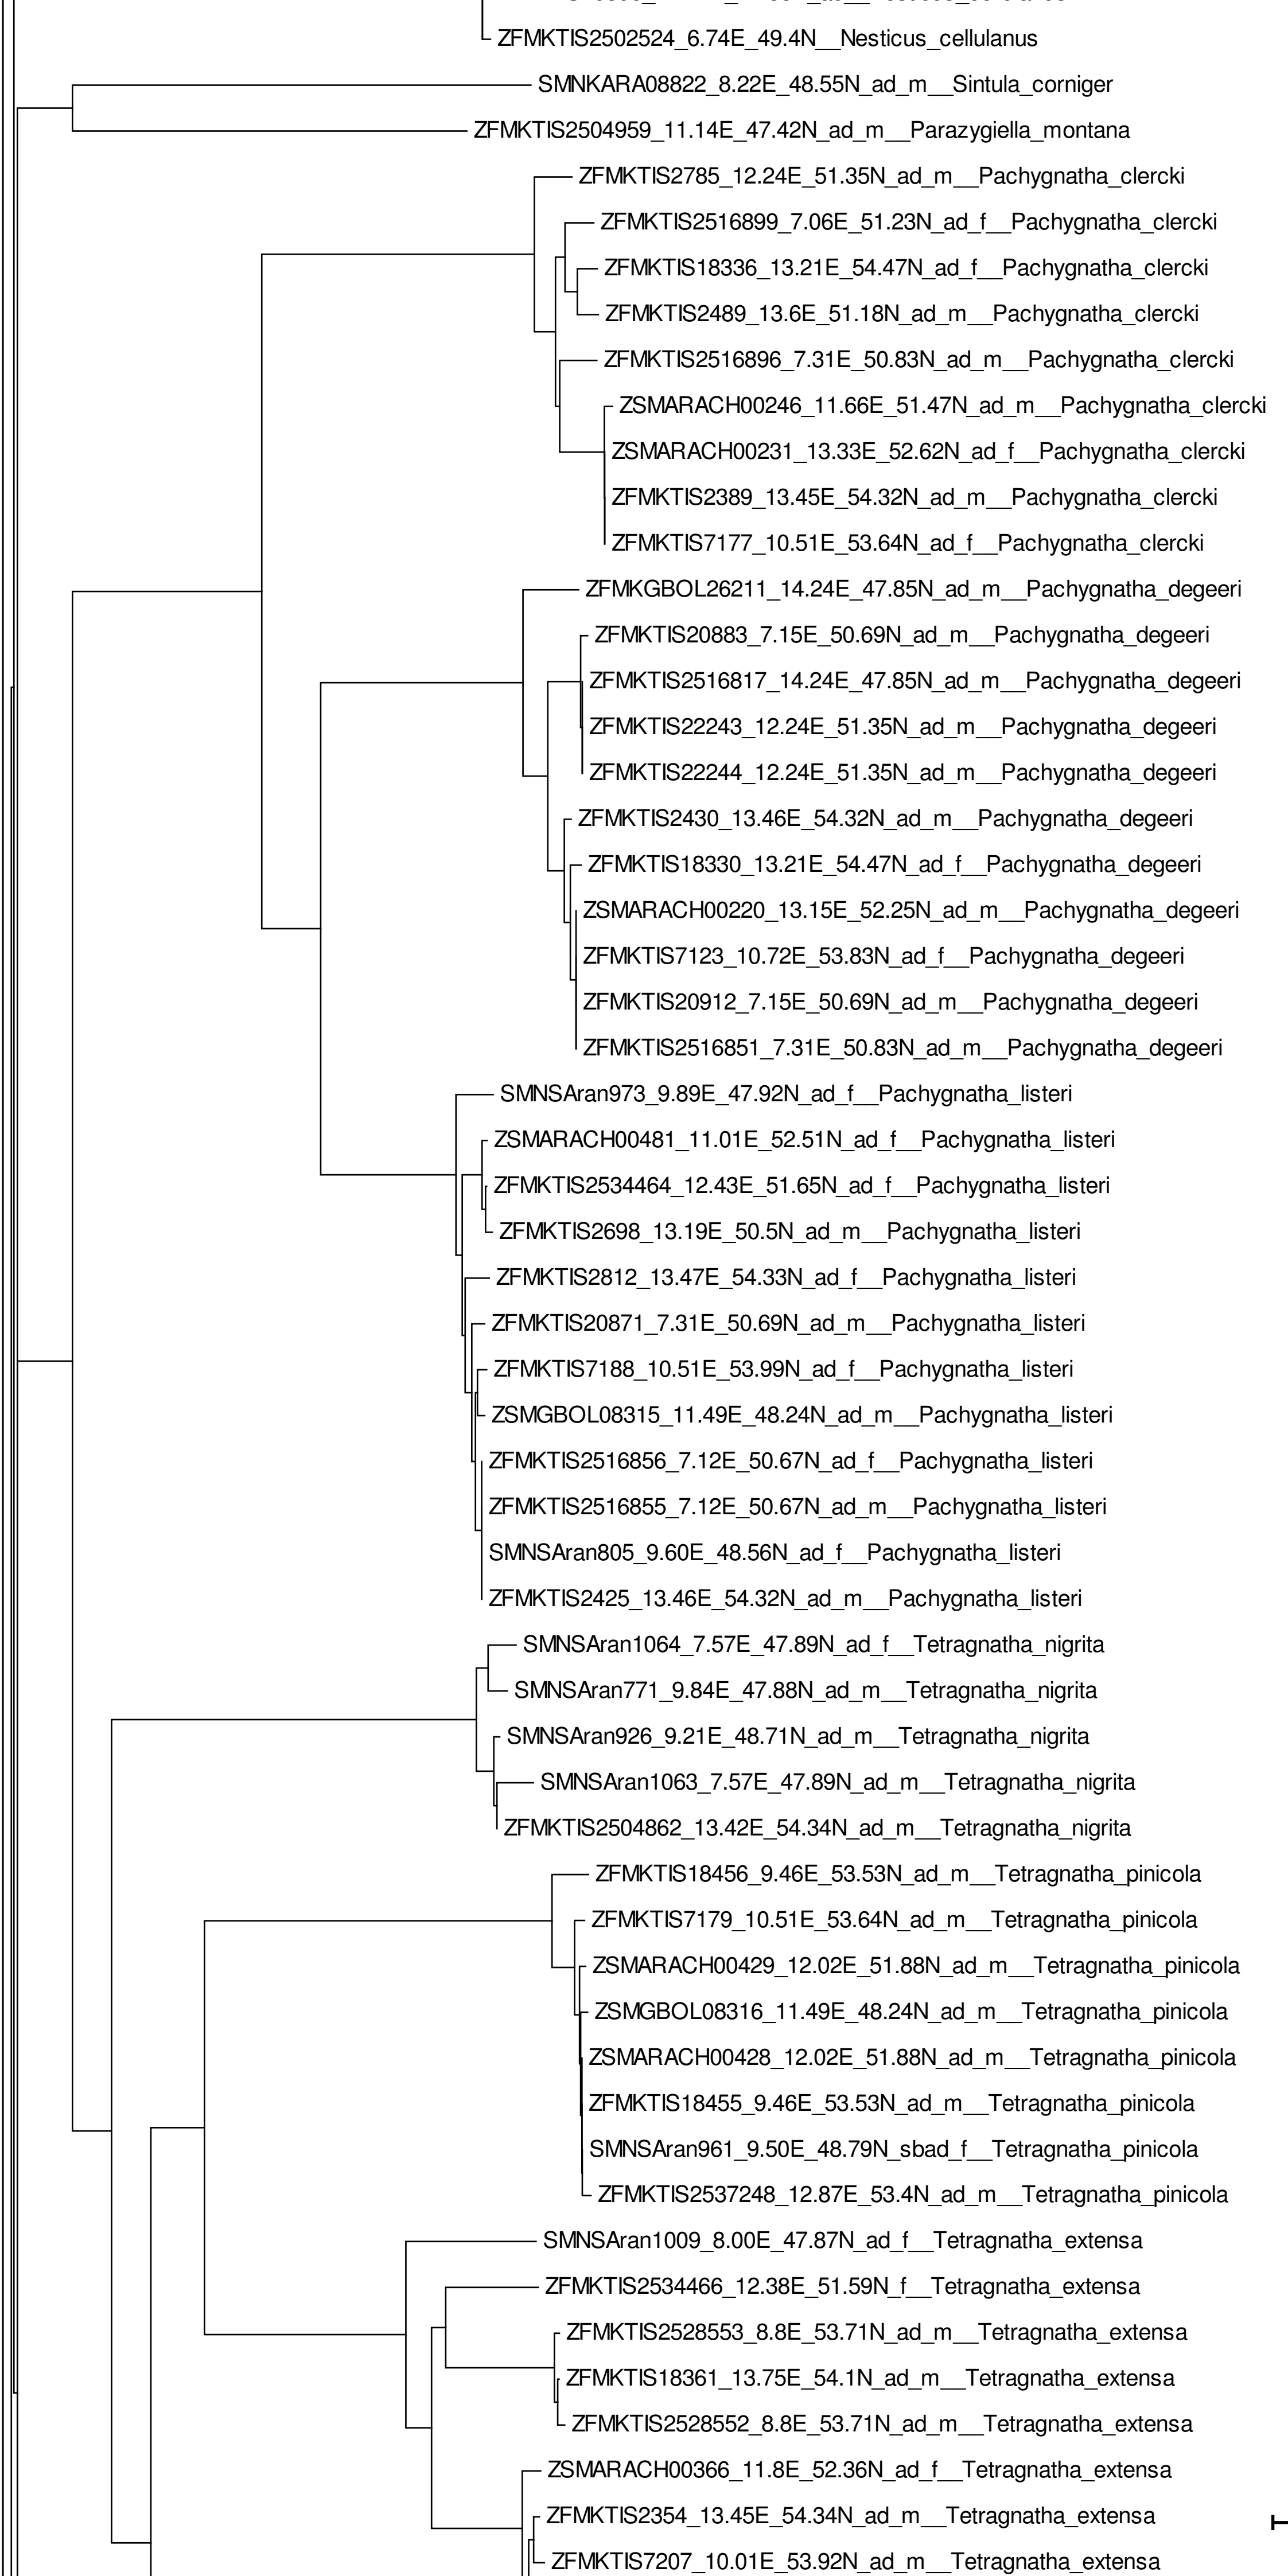

0.02

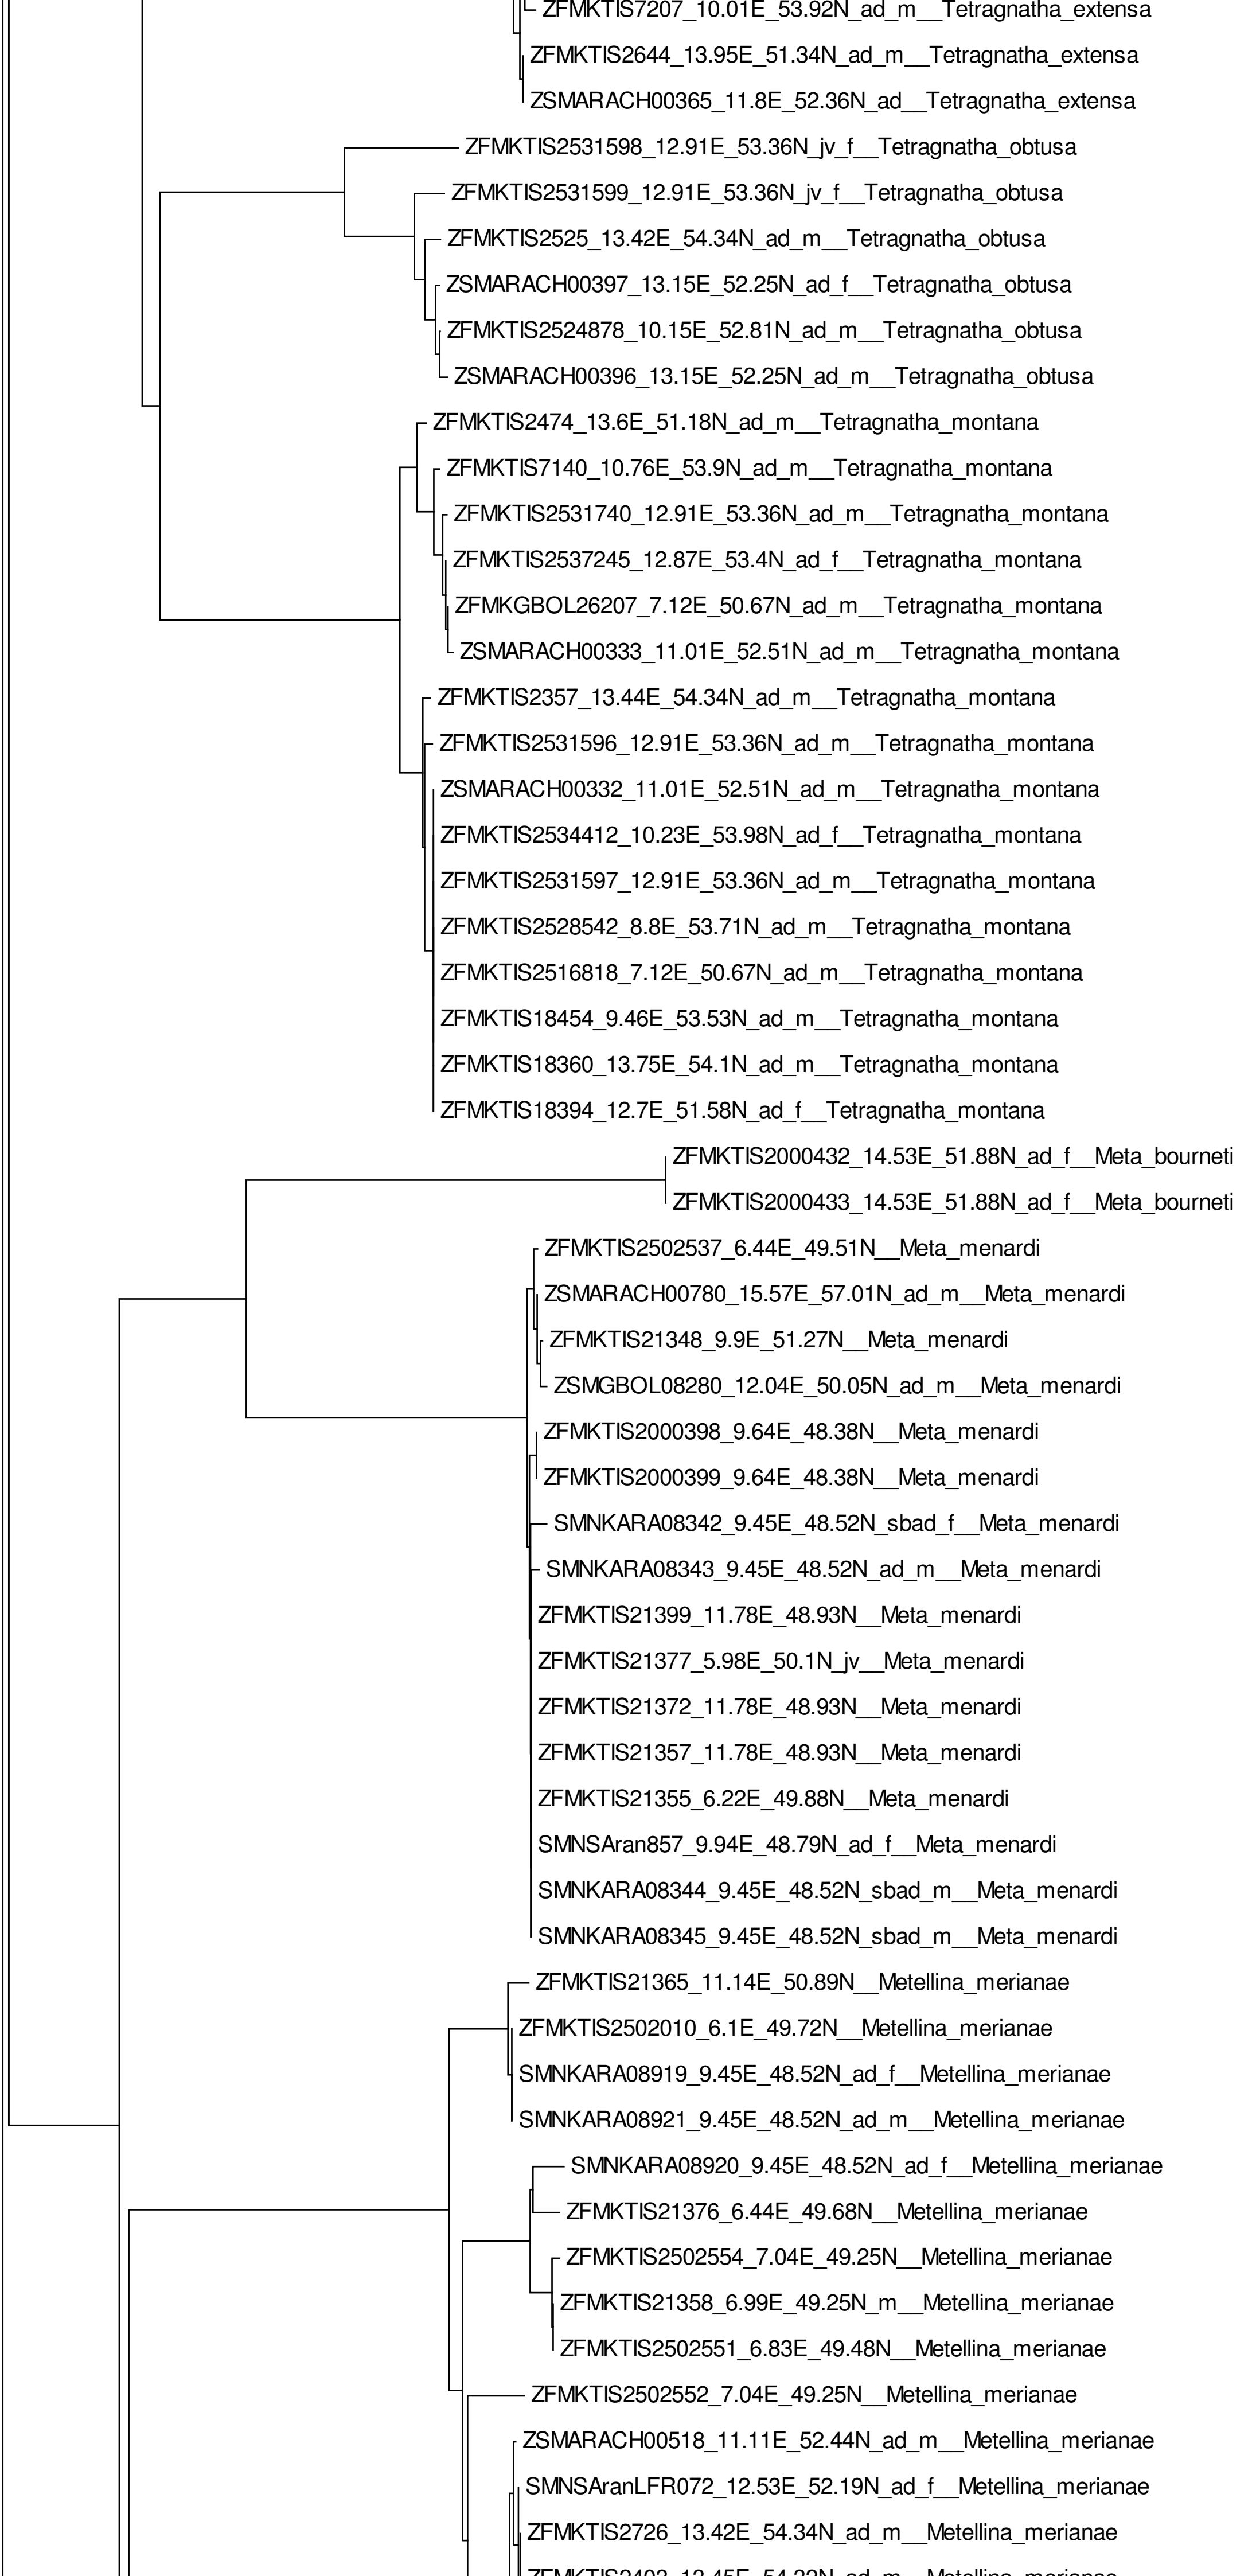

0.02



ZFMKTIS2403\_13.45E\_54.32N\_ad\_m\_\_Metellina\_merianae  
ZFMKTIS20908\_14.17E\_48.36N\_ad\_m\_\_Metellina\_merianae  
ZFMKTIS20958\_14.24E\_47.85N\_ad\_\_Metellina\_merianae  
ZSMARACH00240\_12.93E\_52.26N\_ad\_f\_\_Metellina\_merianae  
ZFMKTIS2502557\_5.96E\_49.92N\_\_Metellina\_merianae  
ZFMKTIS2502149\_7.81E\_49.06N\_ad\_f\_\_Metellina\_merianae  
ZFMKTIS2493\_13.6E\_51.18N\_ad\_f\_\_Metellina\_merianae  
ZFMKTIS2292\_9.69E\_54.68N\_ad\_f\_\_Metellina\_merianae  
ZFMKTIS21397\_11.14E\_50.89N\_\_Metellina\_merianae  
ZFMKTIS18405\_12.7E\_51.58N\_ad\_f\_\_Metellina\_merianae  
ZFMKTIS20957\_14.24E\_47.85N\_ad\_m\_\_Metellina\_merianae  
ZSMARACH00561\_13.95E\_52.45N\_ad\_m\_\_Metellina\_segmentata  
ZFMKTIS2784\_12.24E\_51.35N\_ad\_m\_\_Metellina\_segmentata  
ZFMKTIS2523233\_6.47E\_50.63N\_ad\_m\_\_Metellina\_segmentata  
ZFMKTIS15926\_14.5E\_48.19N\_ad\_f\_\_Metellina\_segmentata  
SMNSAran1120\_14.49E\_51.06N\_ad\_m\_\_Metellina\_segmentata  
ZFMKTIS15900\_11.62E\_50.92N\_ad\_m\_\_Metellina\_segmentata  
SMNSAran1097\_10.02E\_48.73N\_ad\_f\_\_Metellina\_segmentata  
SMNSAran1050\_7.69E\_47.55N\_ad\_f\_\_Metellina\_segmentata  
SMNSAran808\_9.74E\_48.62N\_ad\_f\_\_Metellina\_segmentata  
ZSMARACH00560\_13.95E\_52.45N\_ad\_m\_\_Metellina\_segmentata  
ZFMKTIS2516880\_7.12E\_50.67N\_ad\_f\_\_Metellina\_segmentata  
ZFMKTIS22238\_12.24E\_51.35N\_ad\_m\_\_Metellina\_segmentata  
SMNSAran801\_9.60E\_48.56N\_ad\_f\_\_Metellina\_segmentata  
ZFMKTIS20914\_7.15E\_50.69N\_ad\_m\_\_Metellina\_segmentata  
SMNSAran743\_10.26E\_47.66N\_sbad\_m\_\_Metellina\_segmentata  
SMNSAran798\_9.60E\_48.56N\_ad\_m\_\_Metellina\_segmentata  
ZFMKTIS19124\_8.88E\_54.29N\_ad\_f\_\_Metellina\_segmentata  
SMNSAranLFR085\_12.59E\_52.17N\_ad\_f\_\_Metellina\_segmentata  
ZFMKTIS2516850\_7.12E\_50.67N\_ad\_m\_\_Metellina\_segmentata  
ZFMKTIS2516879\_7.12E\_50.67N\_ad\_m\_\_Metellina\_segmentata

ZFMKTIS9645\_9.79E\_54.67N\_ad\_\_Metellina\_mengei  
ZFMKTIS2306\_9.79E\_54.67N\_ad\_m\_\_Metellina\_mengei  
ZFMKTIS7143\_10.74E\_53.89N\_ad\_m\_\_Metellina\_mengei  
ZFMKTIS2504991\_8.8E\_53.71N\_ad\_m\_\_Metellina\_mengei  
ZFMKTIS2782\_12.93E\_50.71N\_ad\_m\_\_Metellina\_mengei  
ZFMKTIS2523181\_14.17E\_48.36N\_ad\_f\_\_Metellina\_mengei  
ZFMKTIS22237\_12.93E\_50.71N\_ad\_f\_\_Metellina\_mengei  
ZFMKTIS2424\_13.46E\_54.32N\_ad\_m\_\_Metellina\_mengei  
ZSMARACH00253\_13.41E\_52.18N\_ad\_m\_\_Metellina\_mengei  
ZSMARACH00252\_13.41E\_52.18N\_ad\_m\_\_Metellina\_mengei  
ZFMKTIS2504995\_8.8E\_53.71N\_ad\_m\_\_Metellina\_mengei  
ZFMKTIS2531583\_12.91E\_53.36N\_ad\_f\_\_Metellina\_mengei  
SMNSAran998\_8.00E\_47.87N\_ad\_m\_\_Metellina\_mengei  
SMNSAran1017\_8.00E\_47.87N\_ad\_f\_\_Metellina\_mengei  
ZFMKTIS2523273\_6.77E\_49.89N\_ad\_m\_\_Metellina\_mengei  
ZFMKTIS2523195\_7.08E\_50.68N\_ad\_m\_\_Metellina\_mengei  
ZFMKTIS2523184\_7.11E\_50.67N\_ad\_m\_\_Metellina\_mengei  
ZFMKTIS2517008\_7.06E\_51.23N\_ad\_m\_\_Metellina\_mengei  
ZFMKTIS2516837\_7.12E\_50.69N\_ad\_f\_\_Metellina\_mengei  
ZFMKTIS2516820\_7.3E\_50.69N\_ad\_m\_\_Metellina\_mengei  
ZFMKTIS2516819\_7.12E\_50.69N\_ad\_f\_\_Metellina\_mengei  
ZFMKTIS2504943\_11.13E\_47.53N\_ad\_m\_\_Metellina\_mengei  
ZFMKTIS2504892\_11.27E\_47.44N\_ad\_m\_\_Metellina\_mengei  
ZFMKTIS2504850\_8.93E\_51.18N\_ad\_f\_\_Metellina\_mengei  
SMNSAran869\_9.94E\_48.79N\_sbad\_m\_\_Metellina\_mengei

SMNKARA08789\_8.66E\_49.33N\_ad\_f\_Metellina\_mengei  
SMNKARA08790\_8.66E\_49.33N\_ad\_f\_Metellina\_mengei

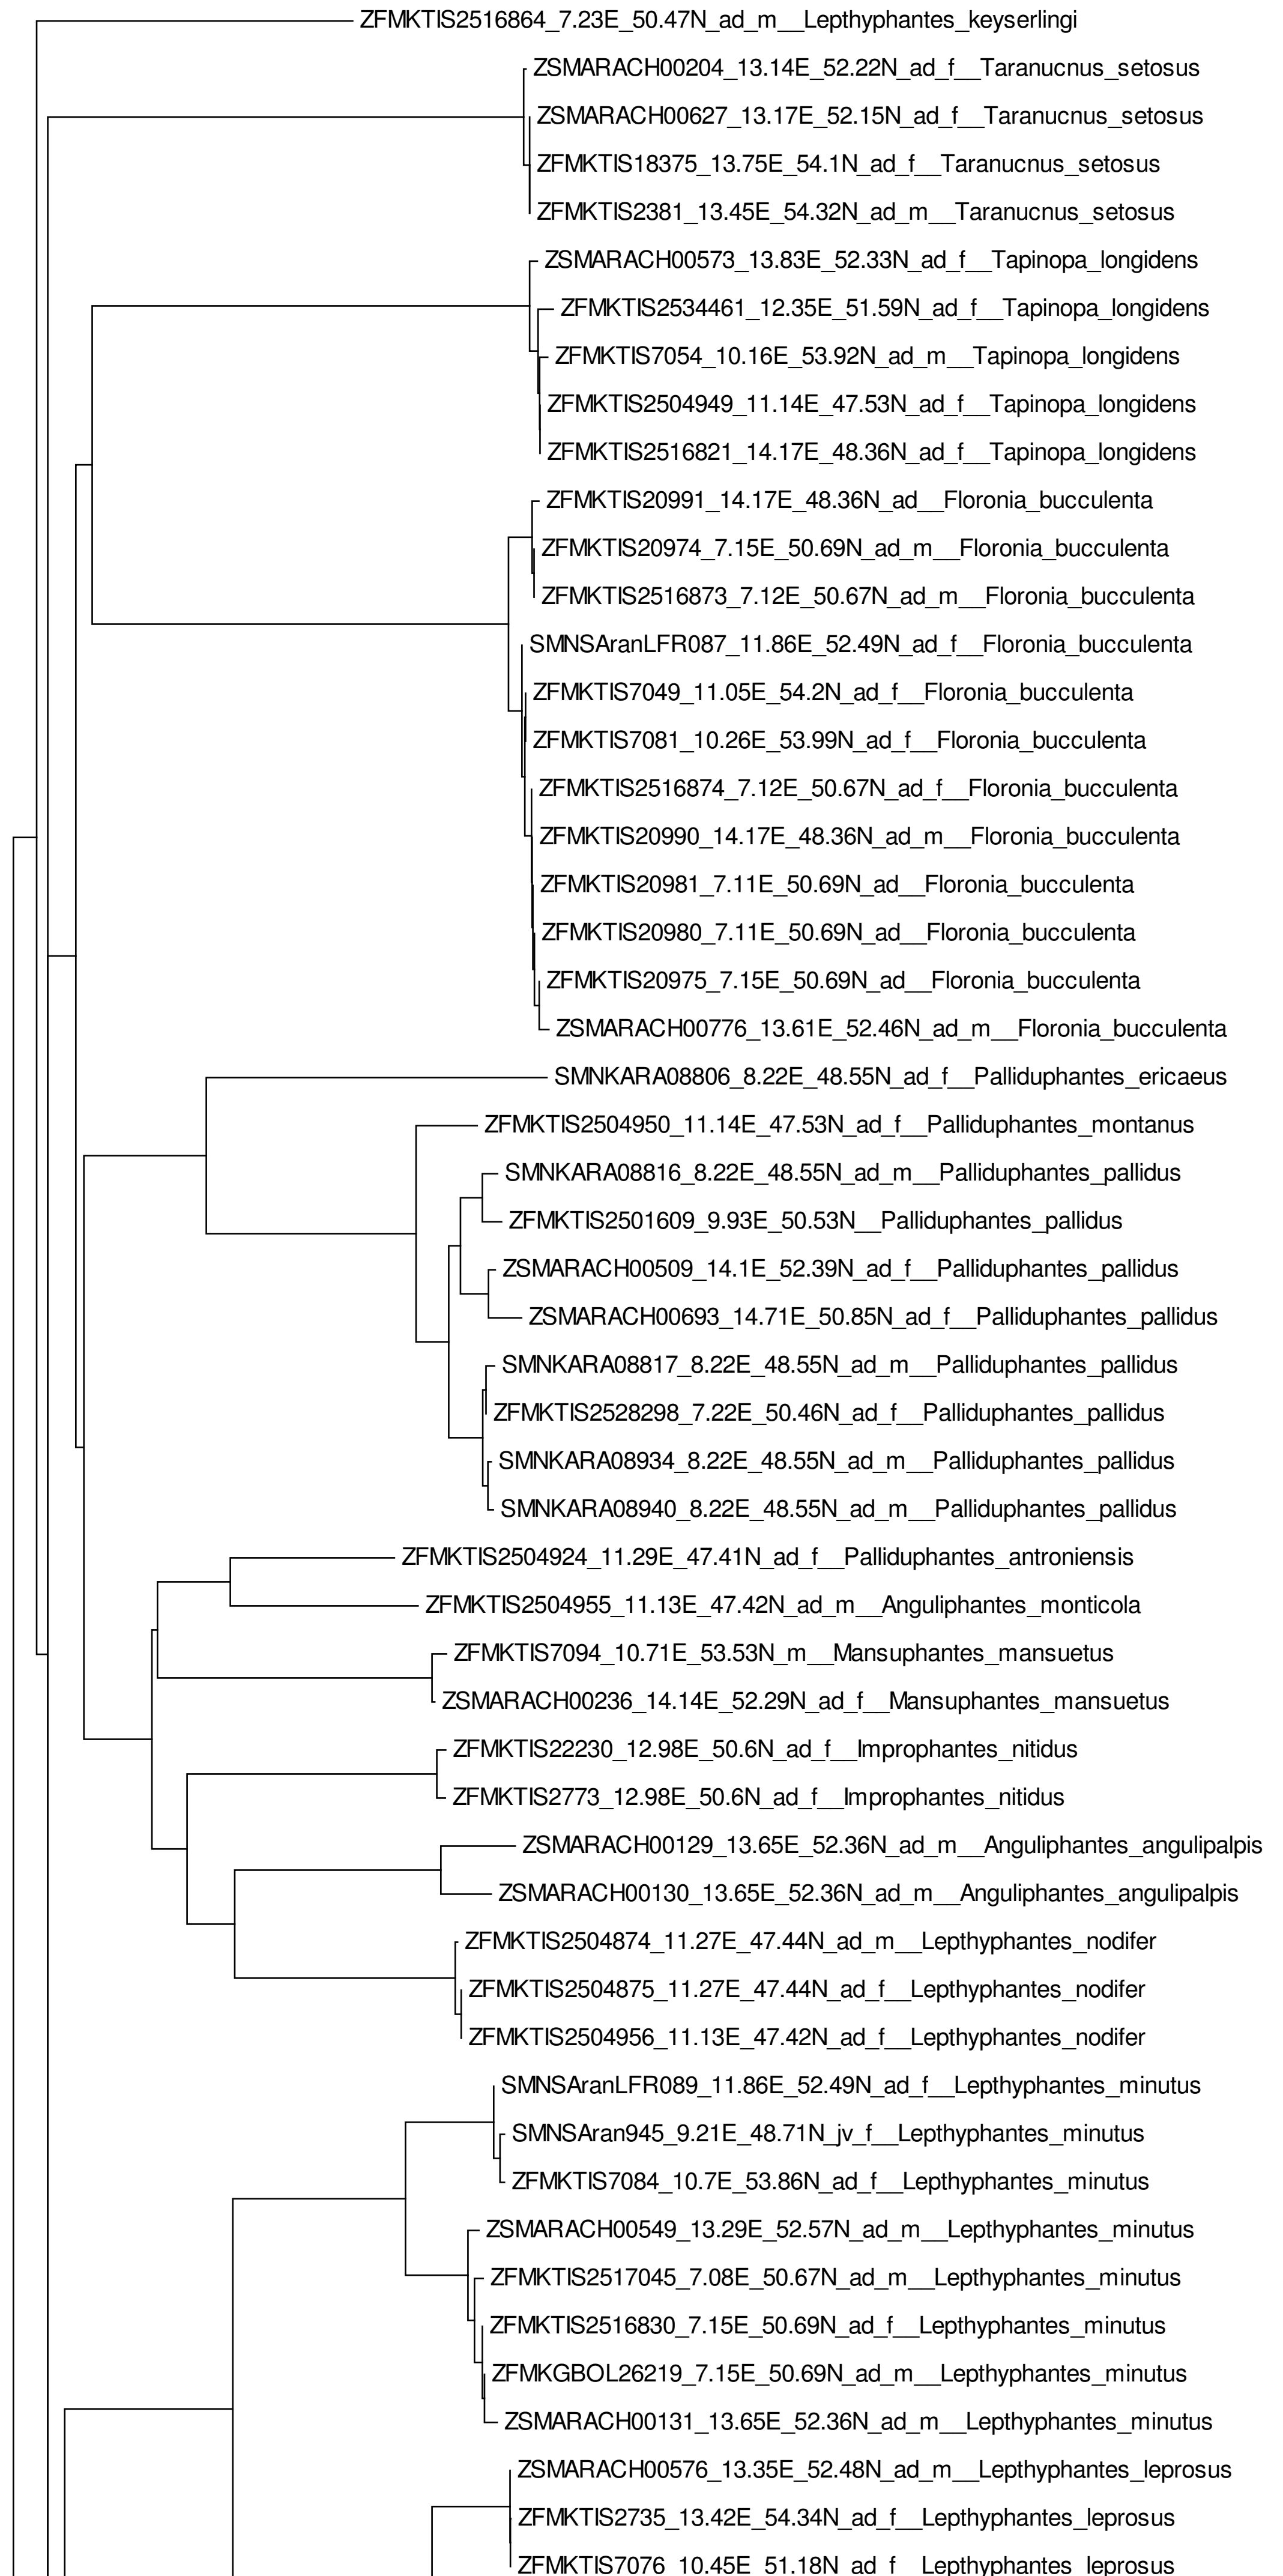

0.02



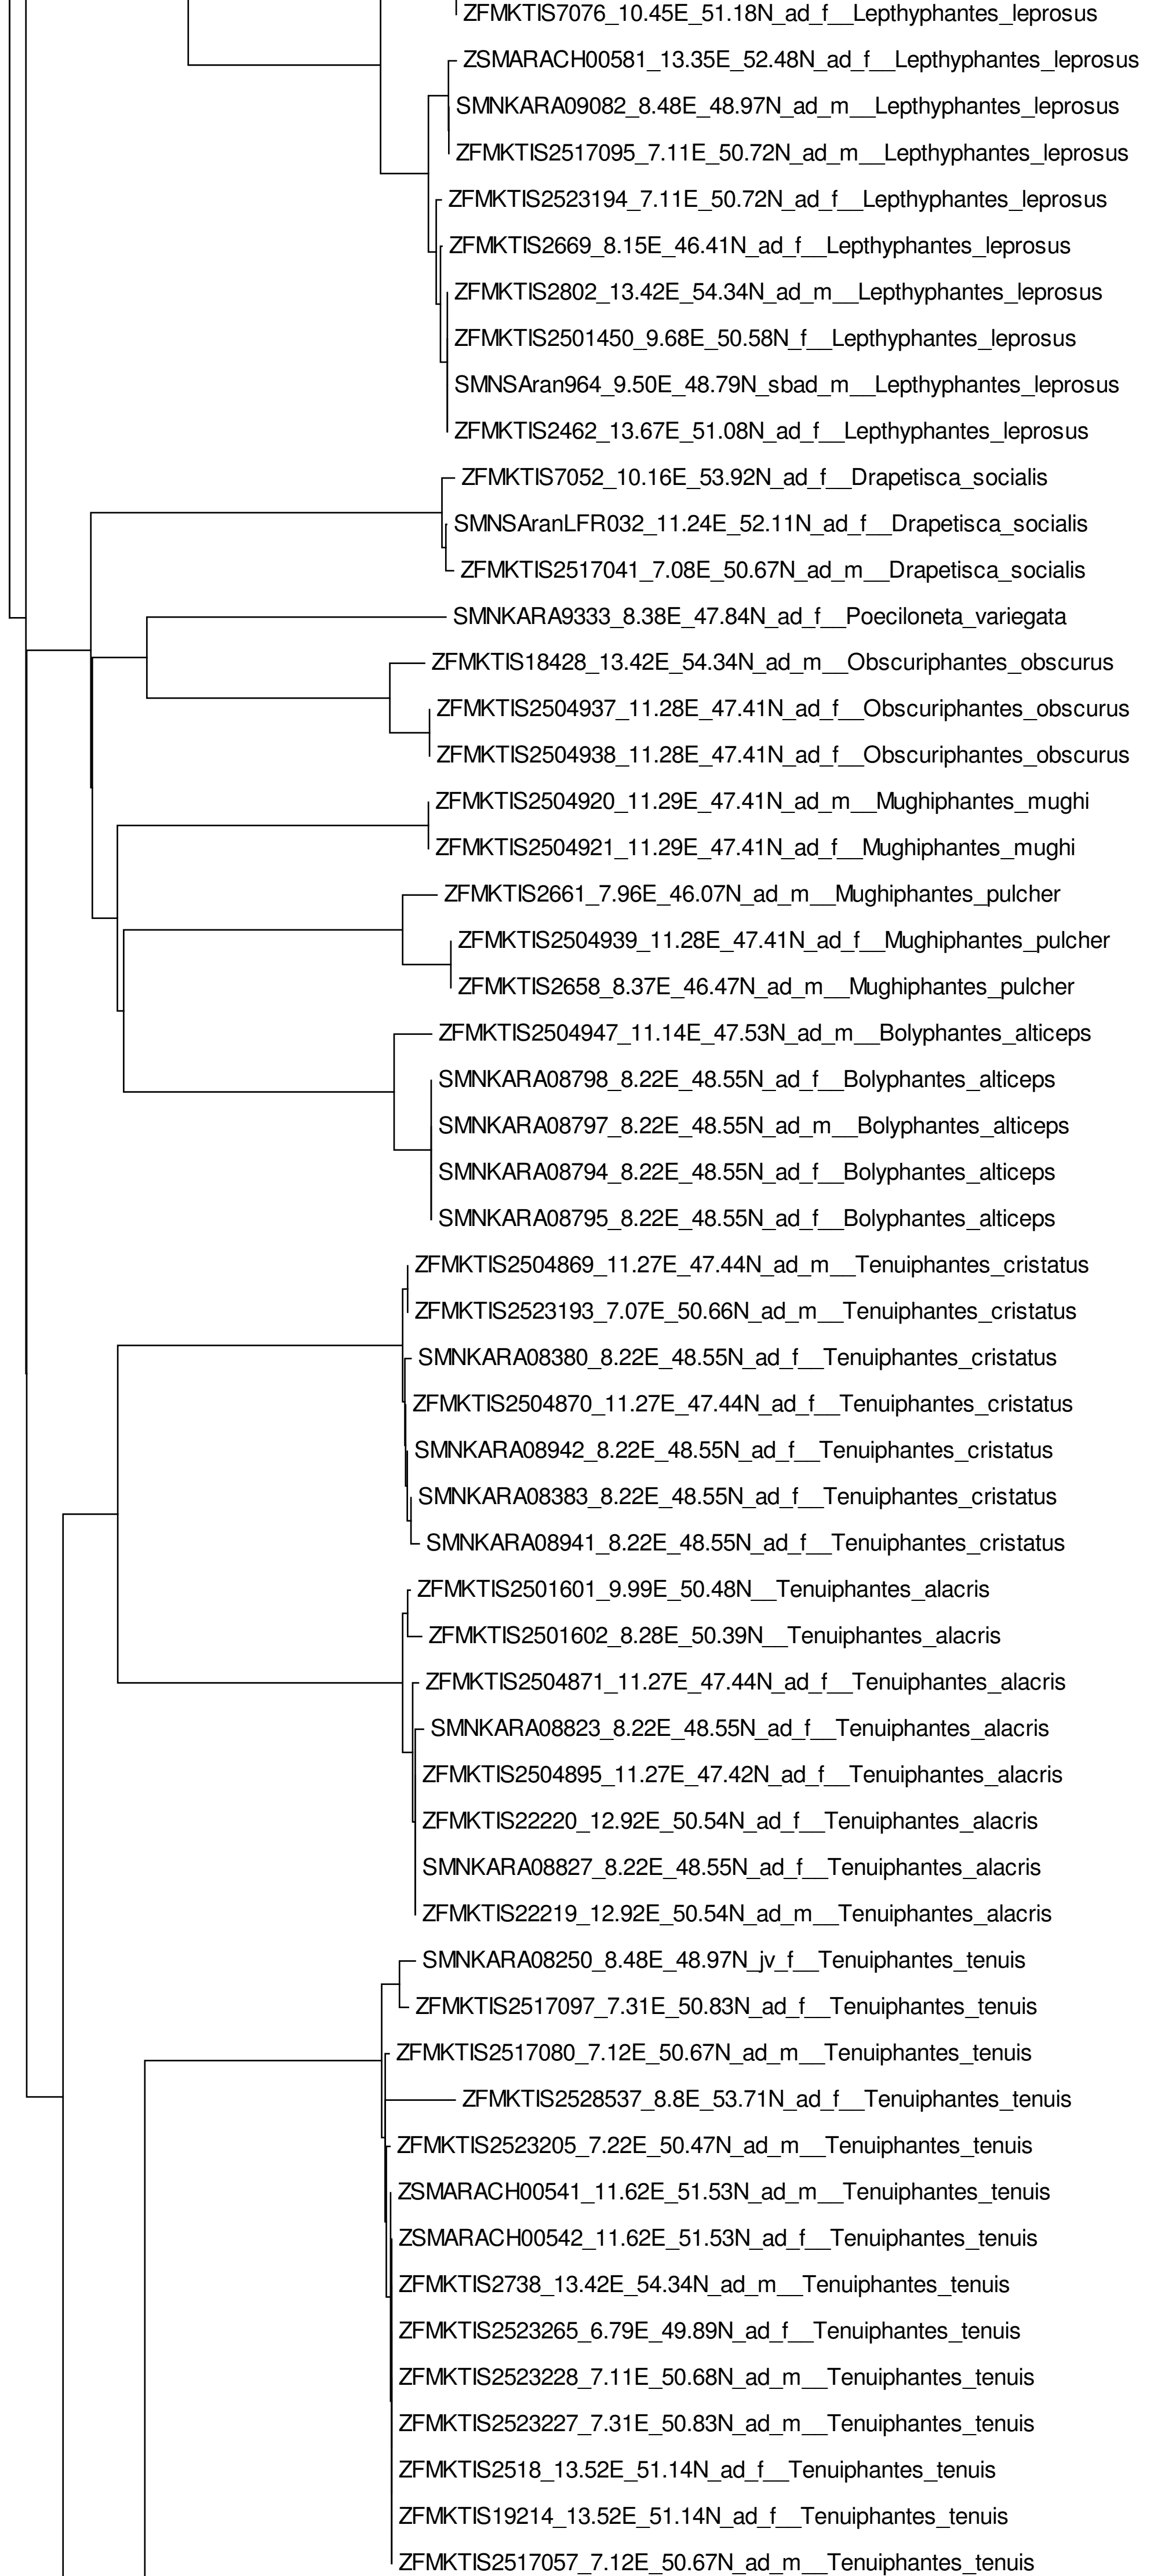

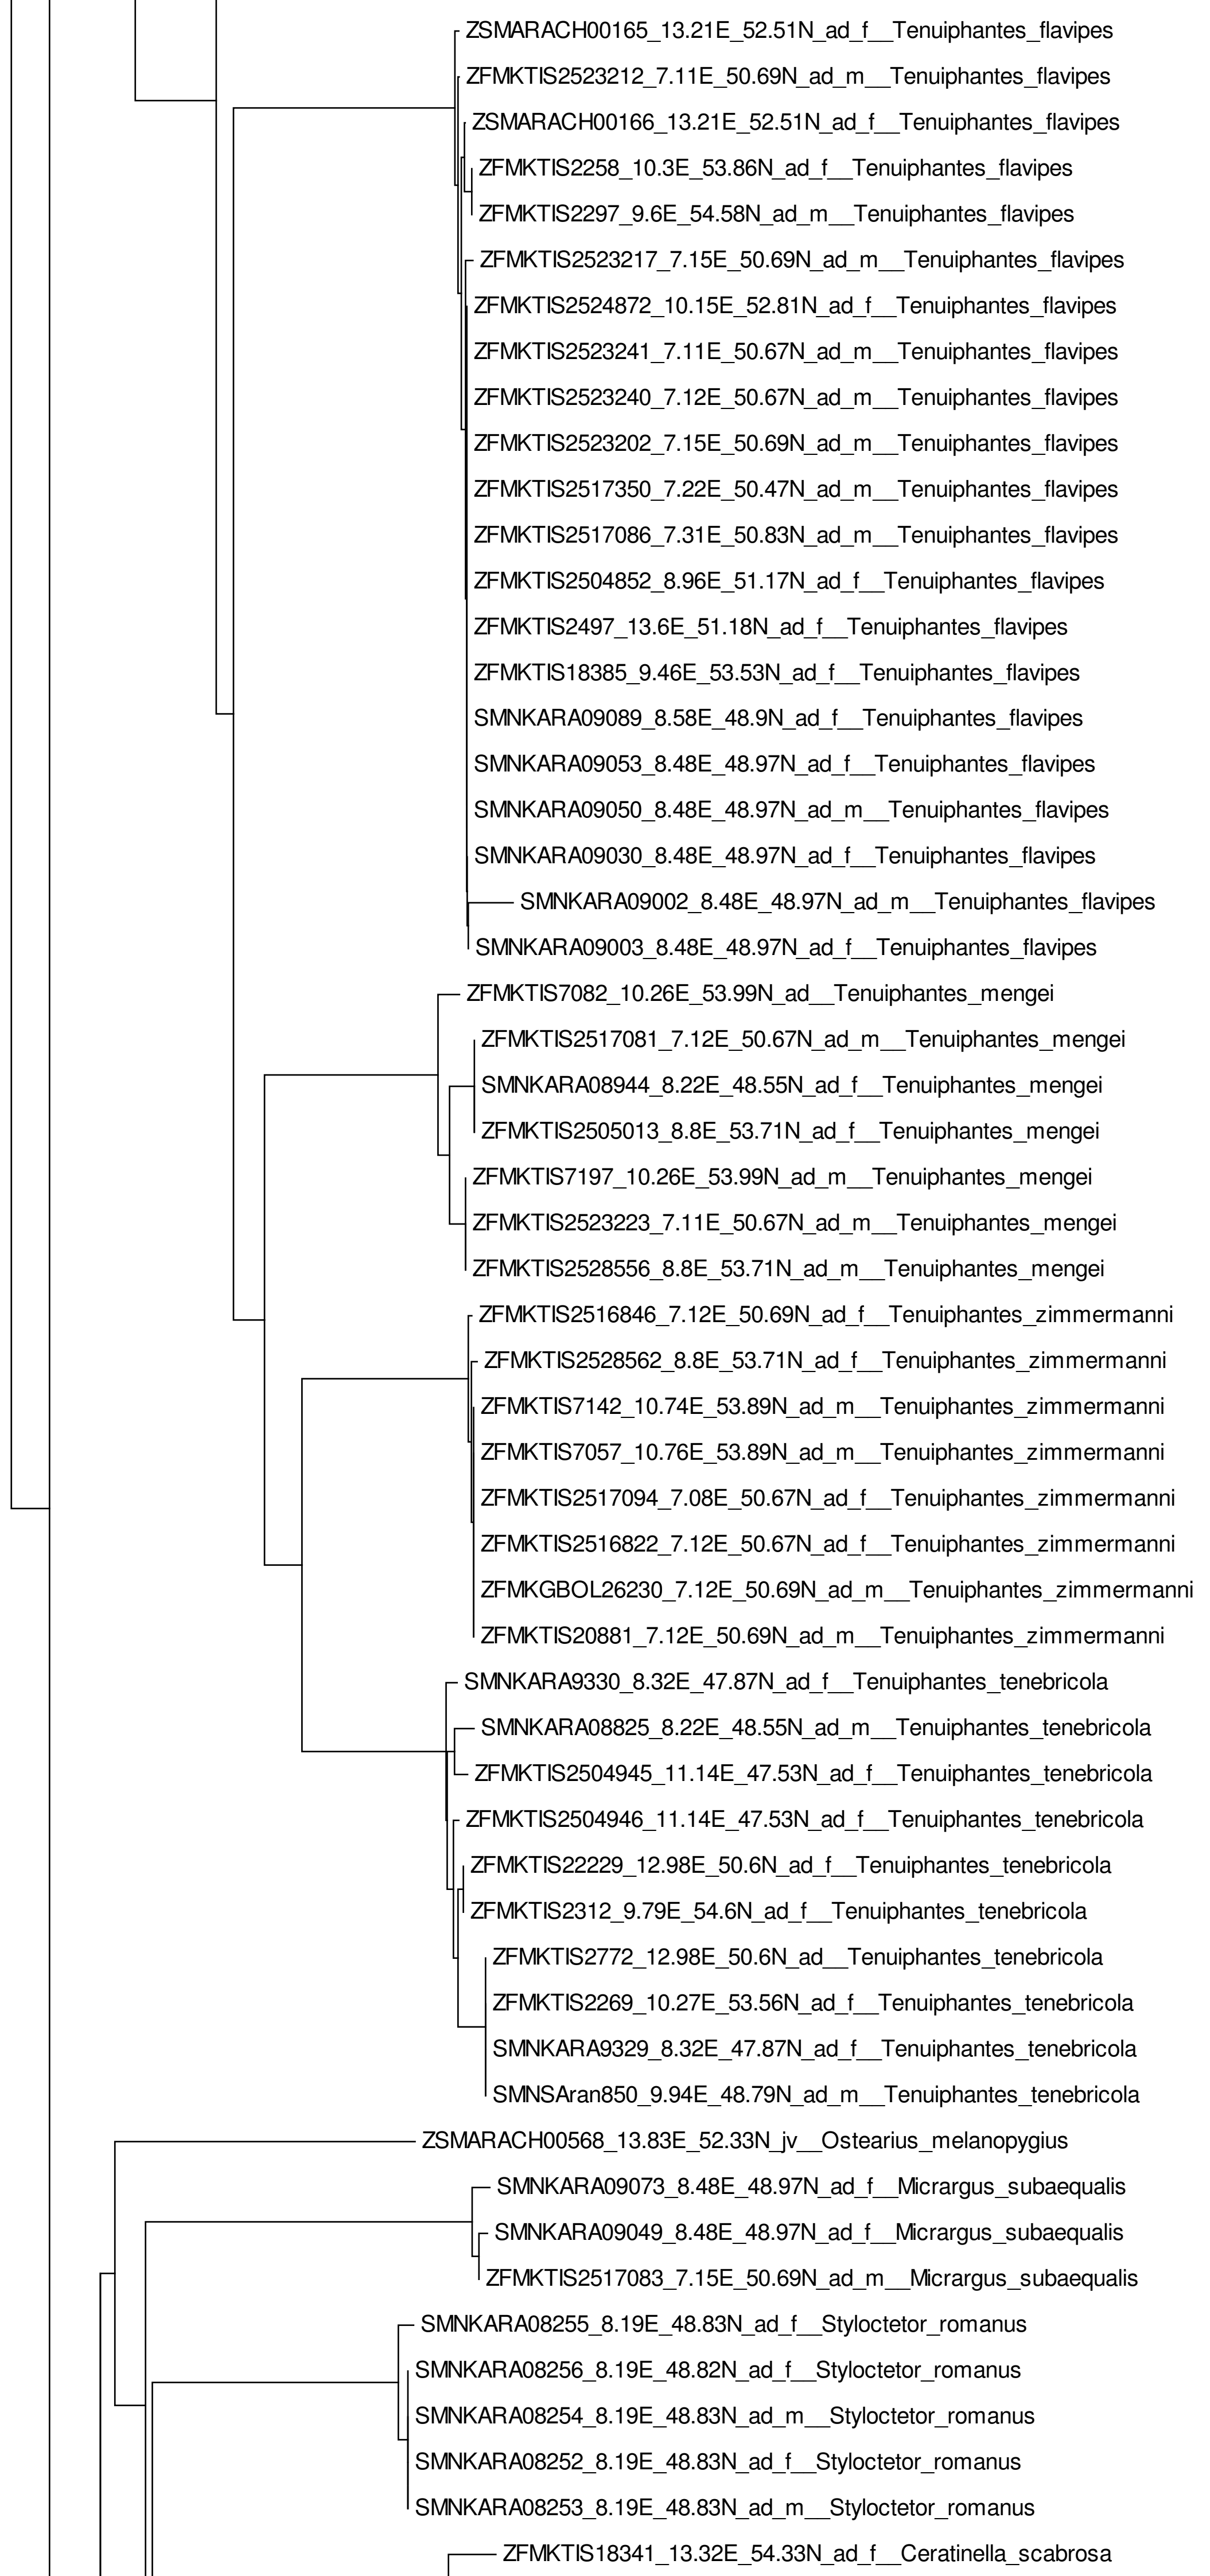



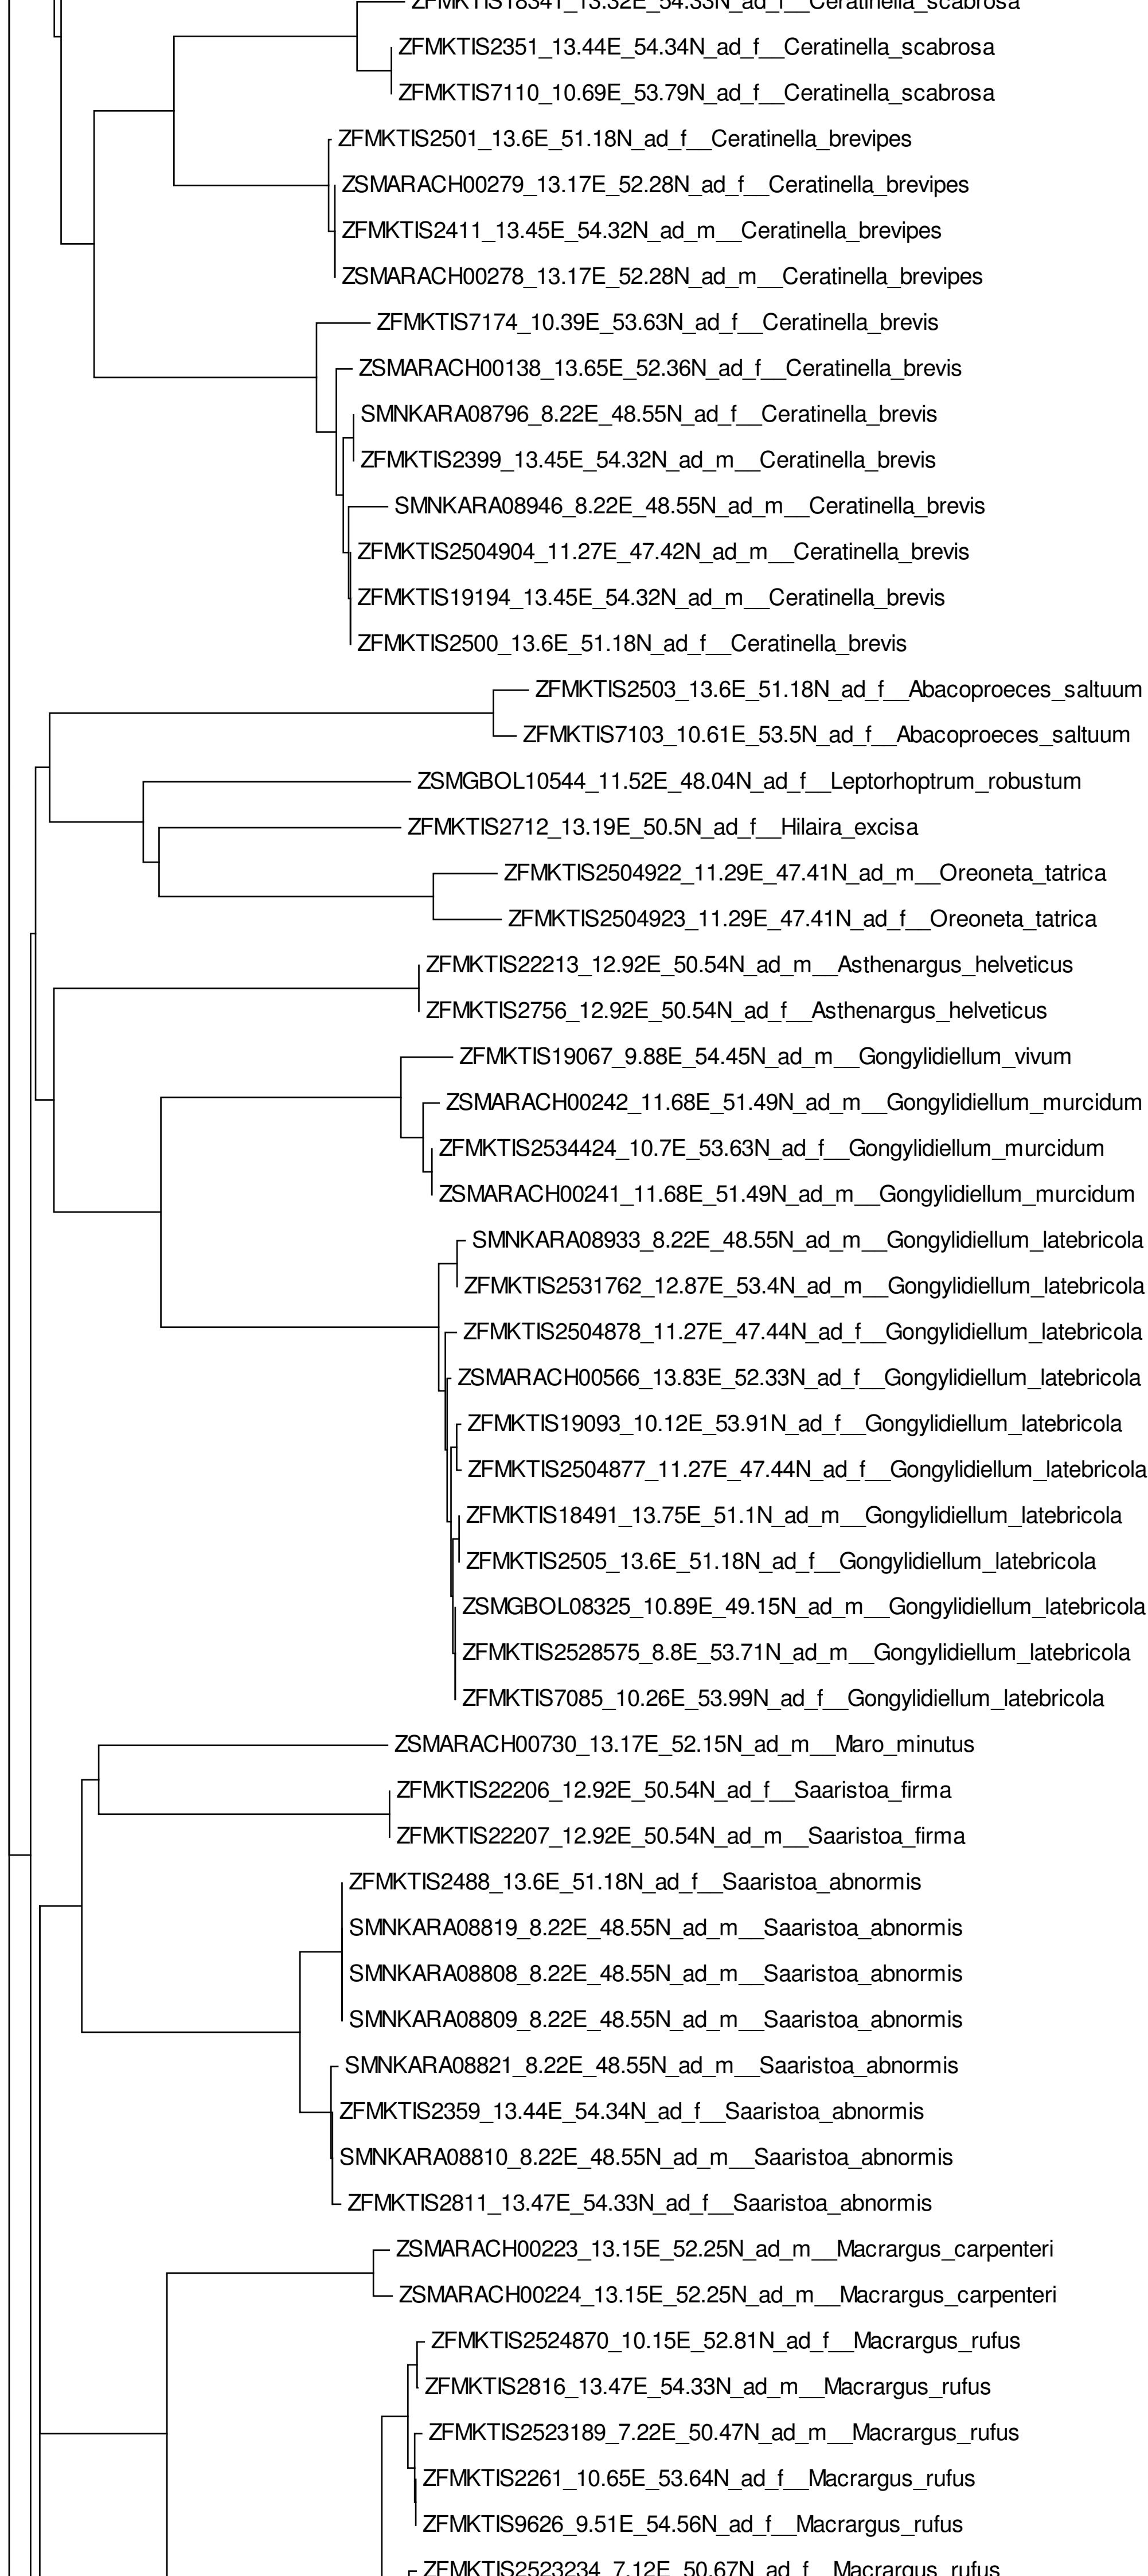

0.02

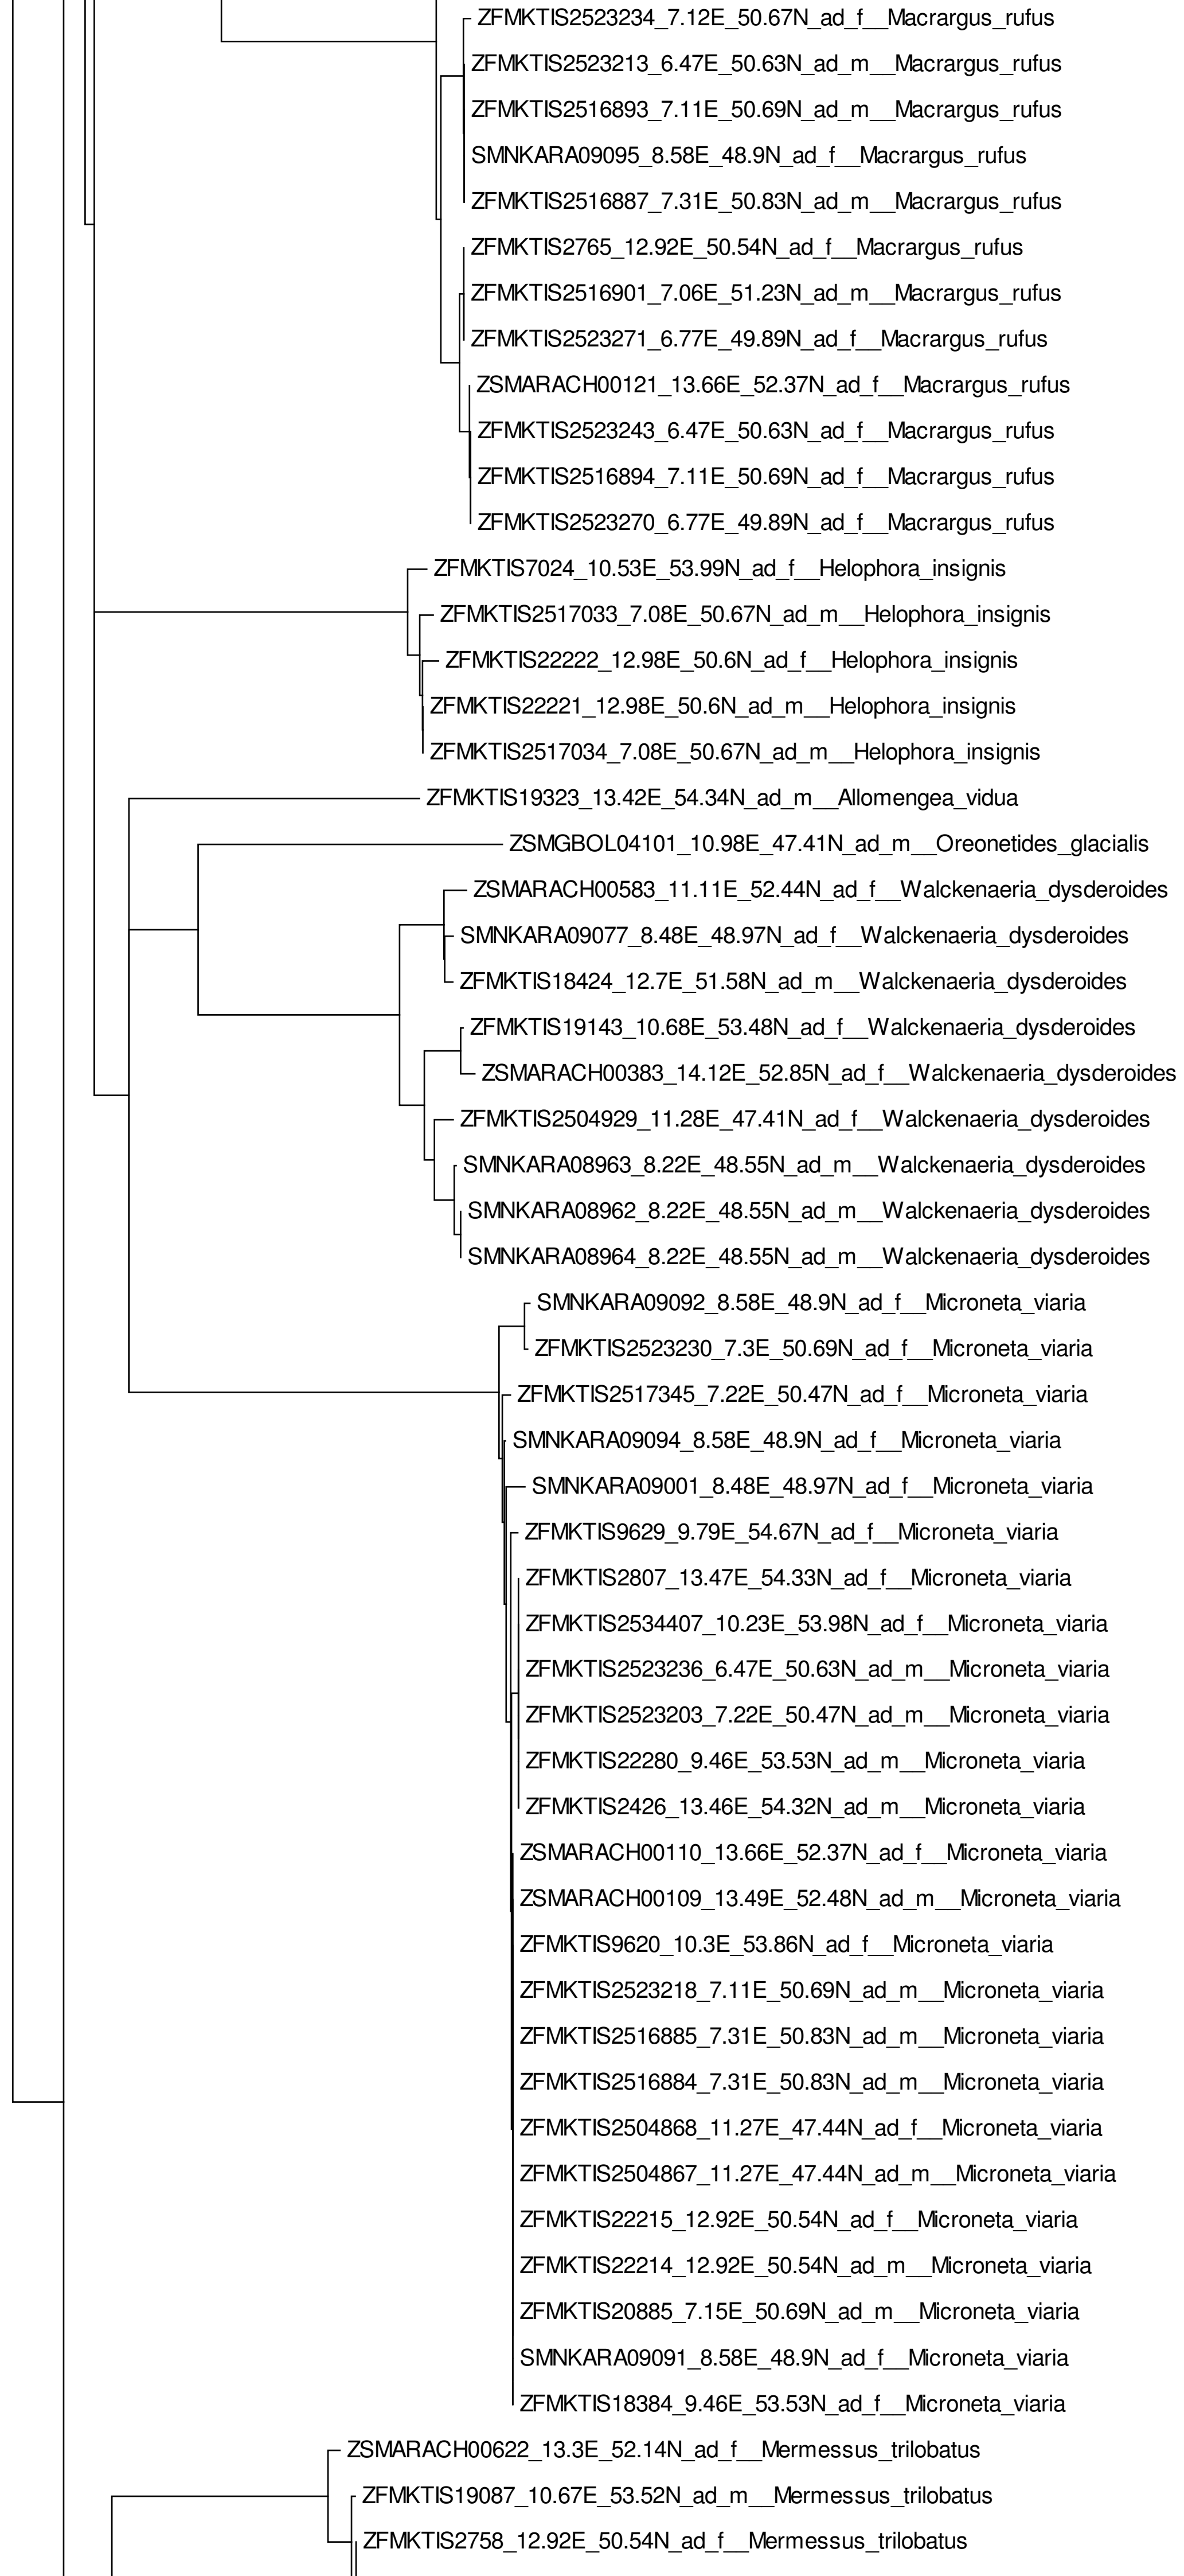



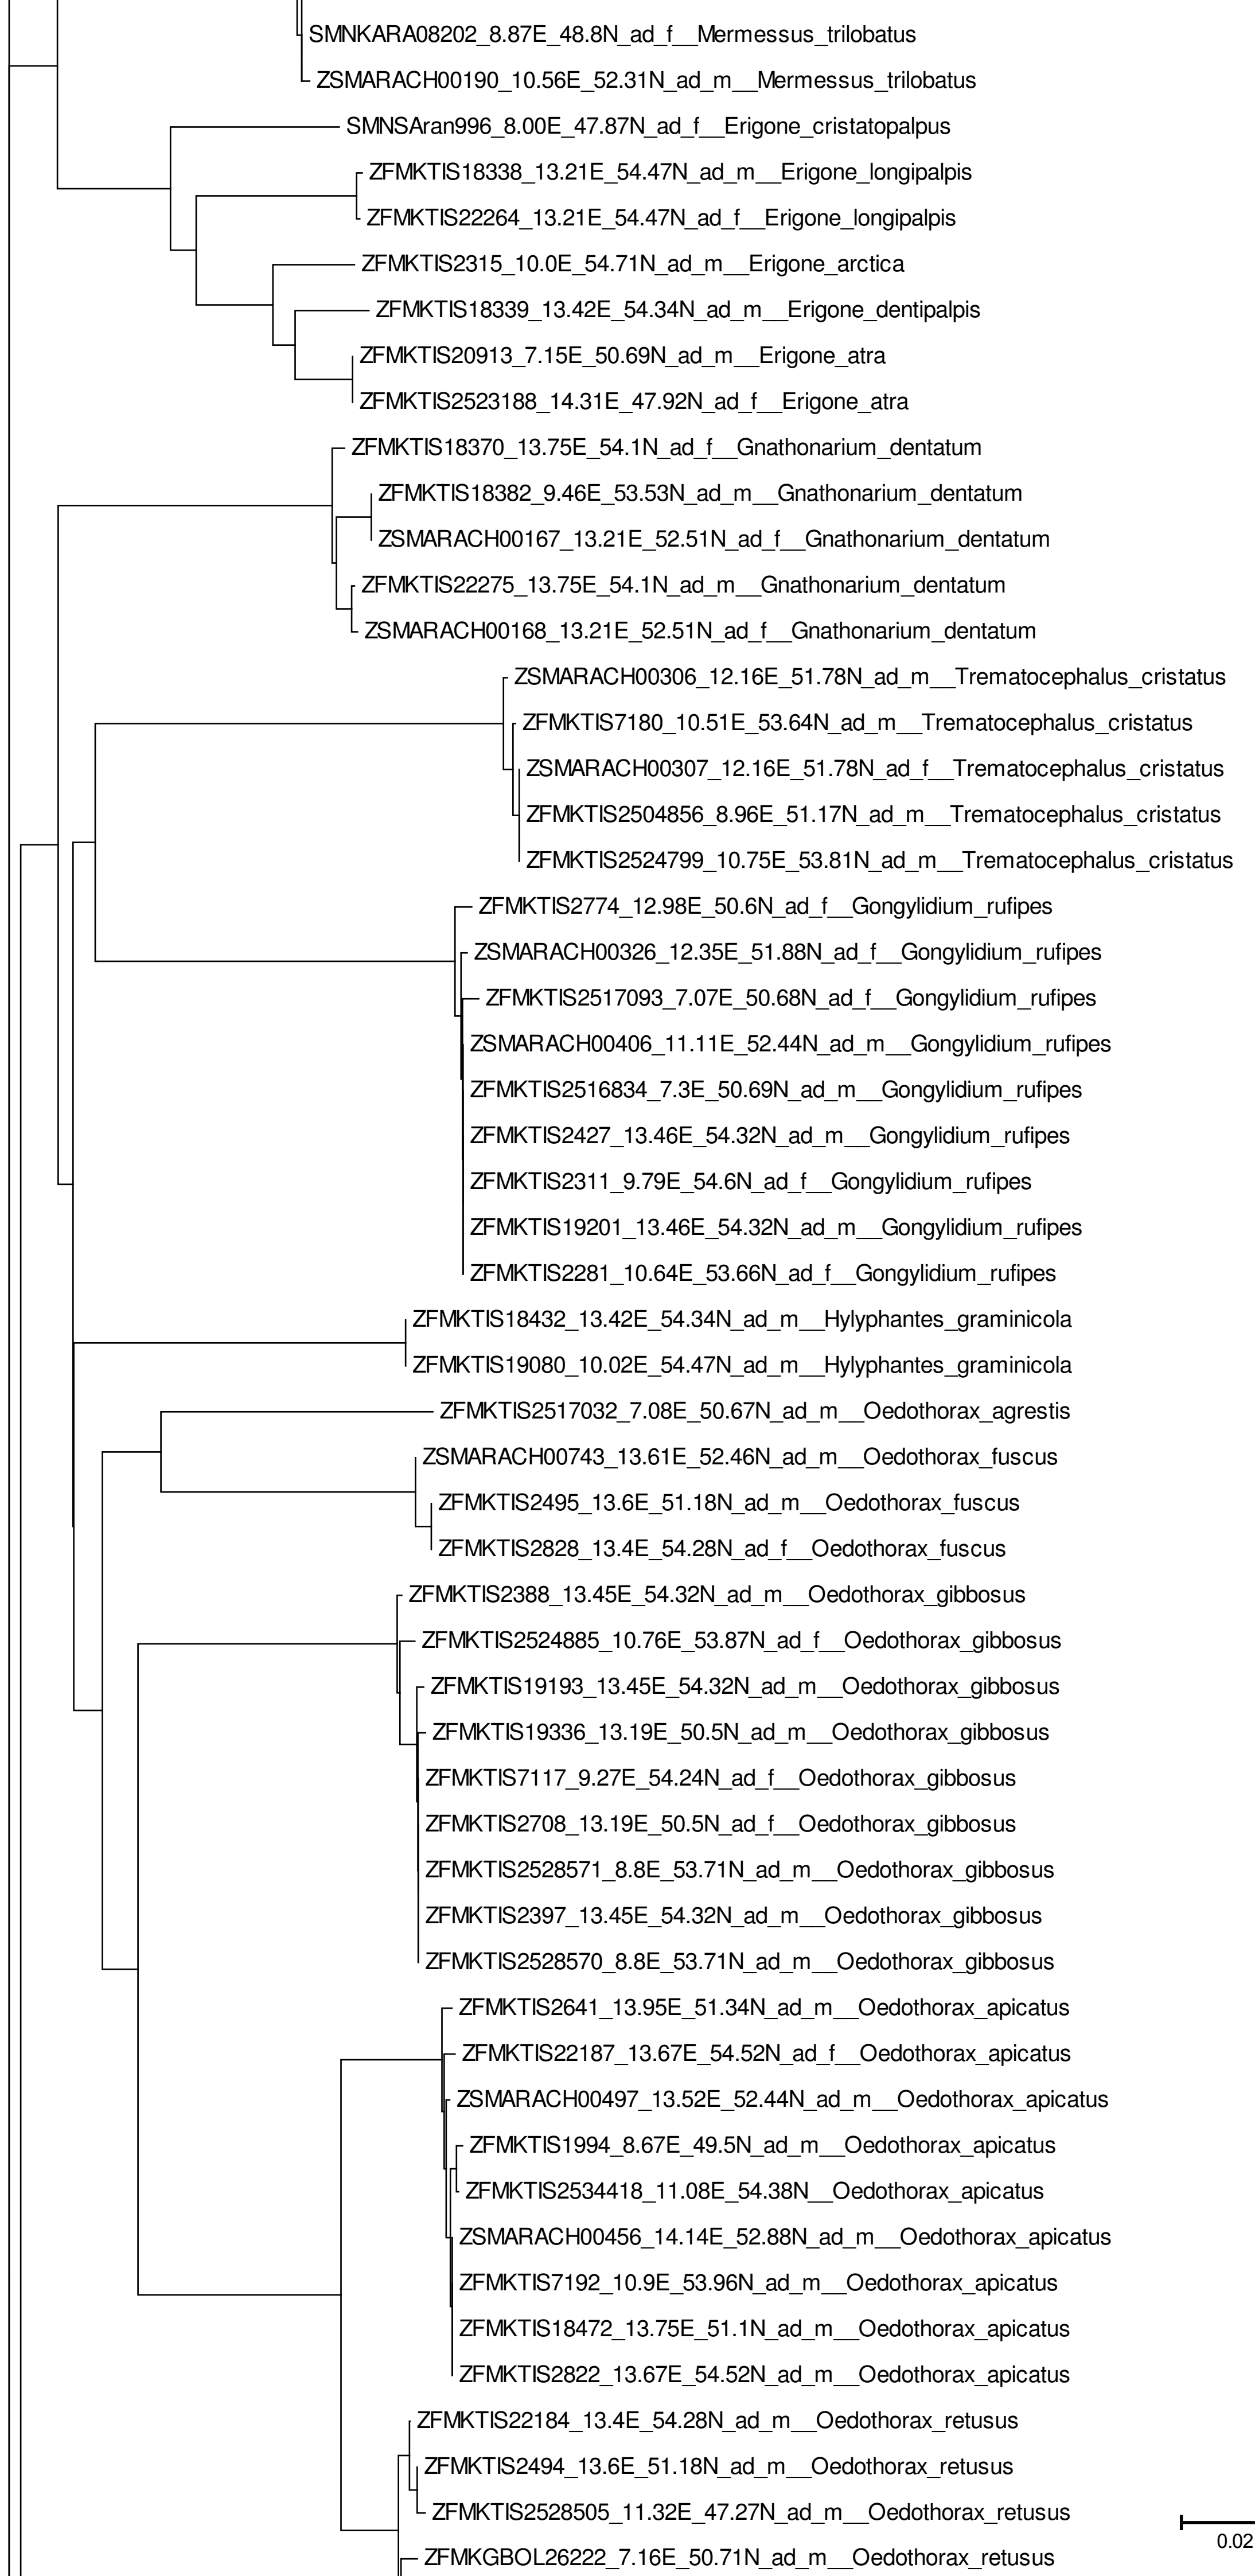

0.02

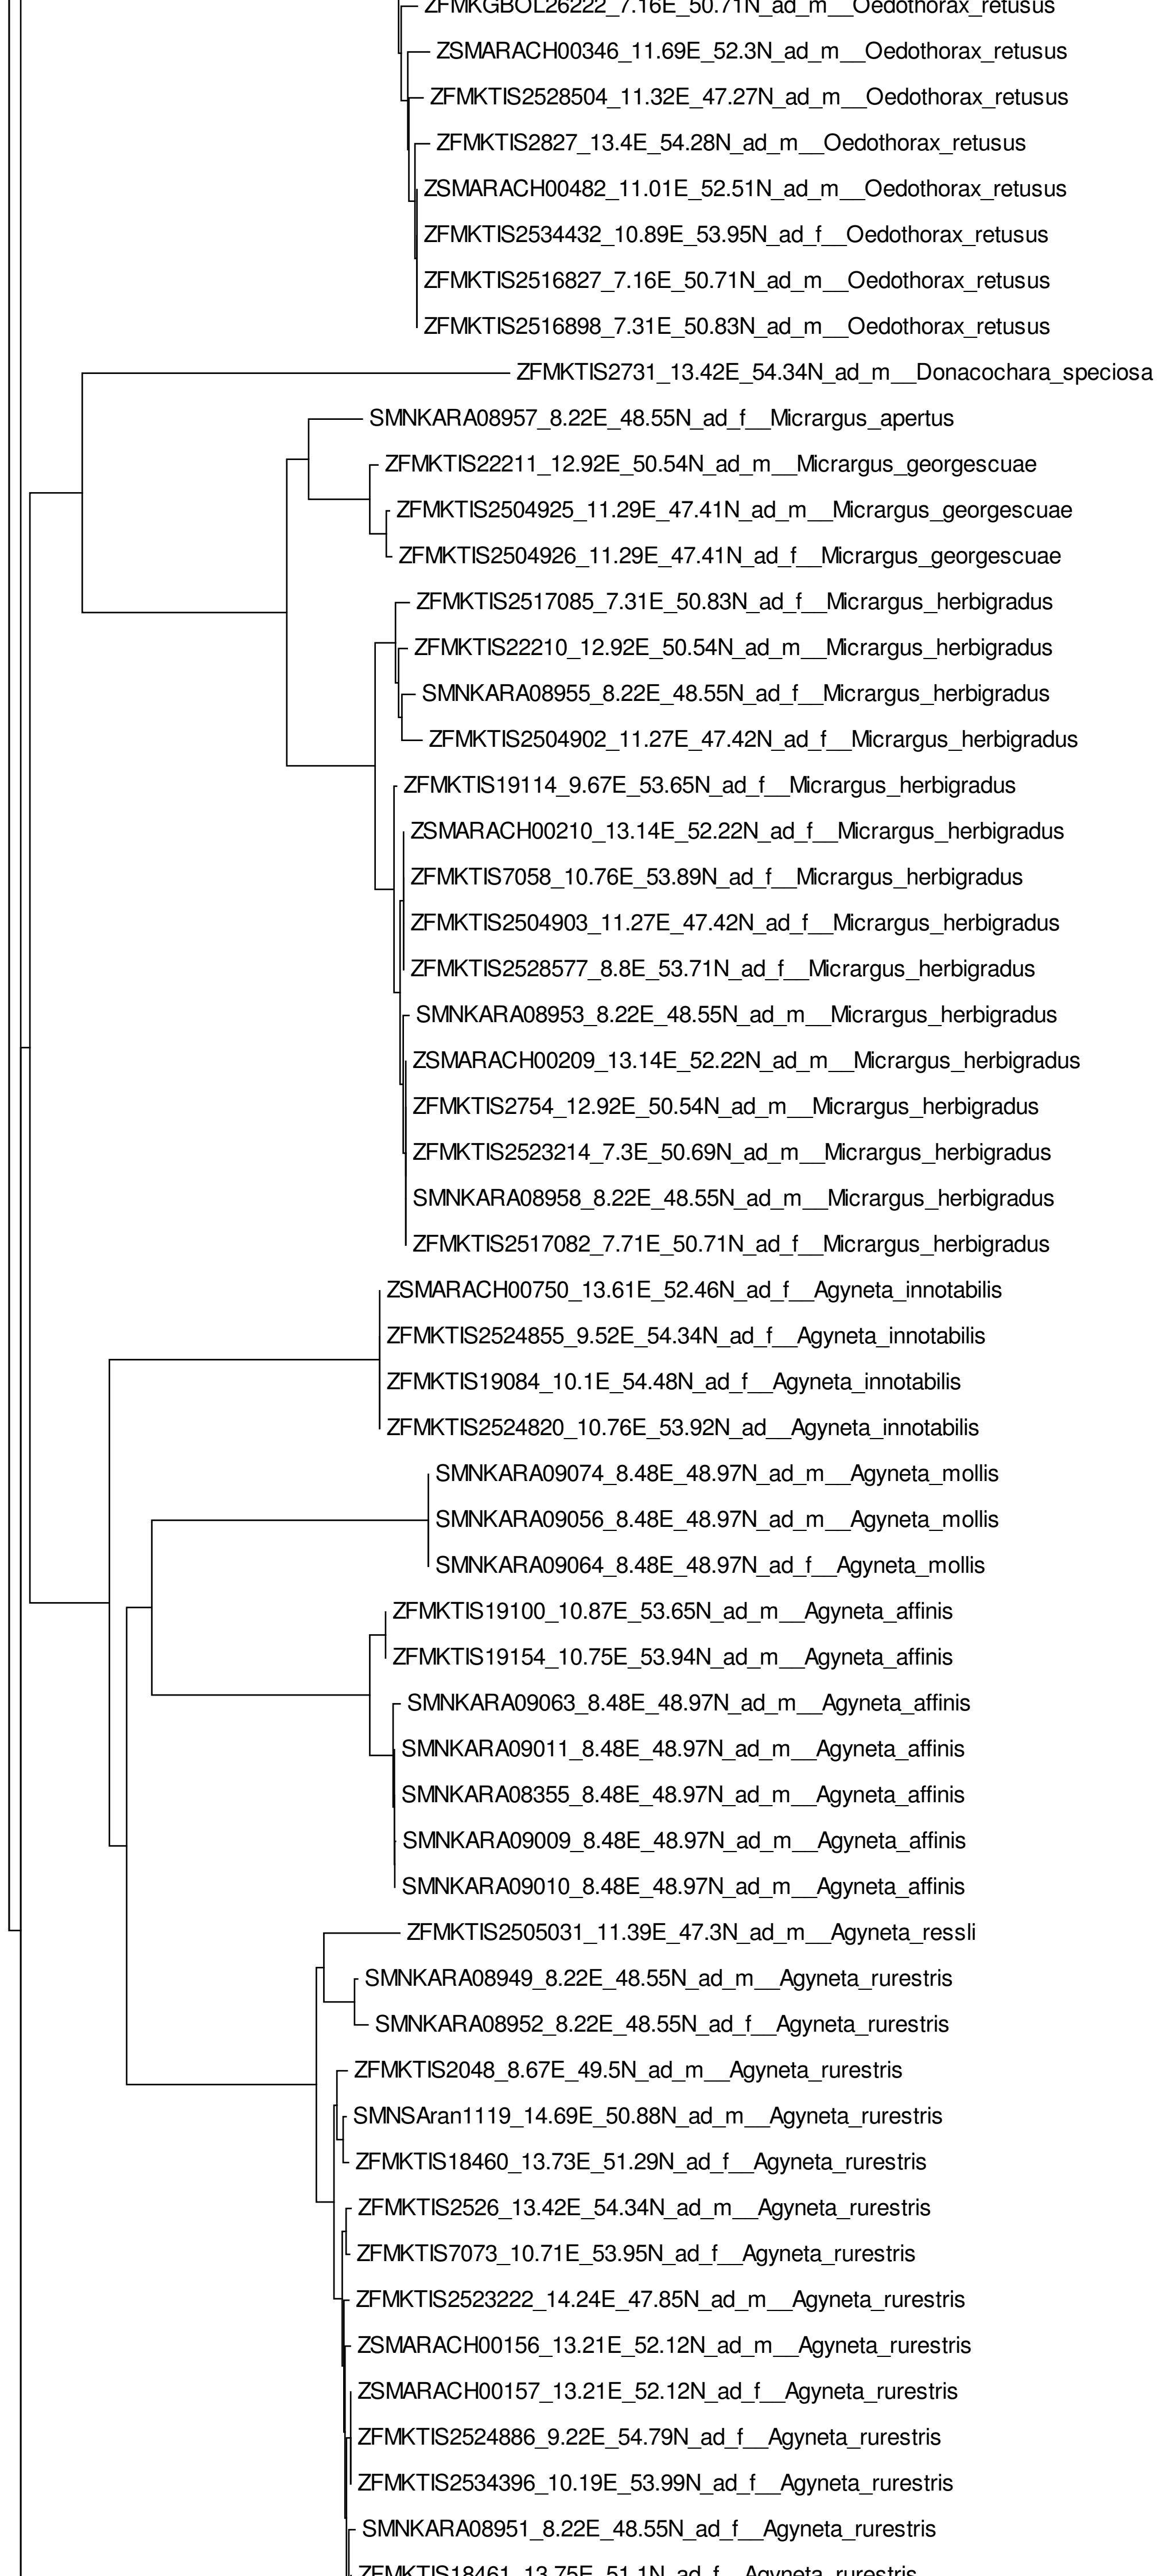



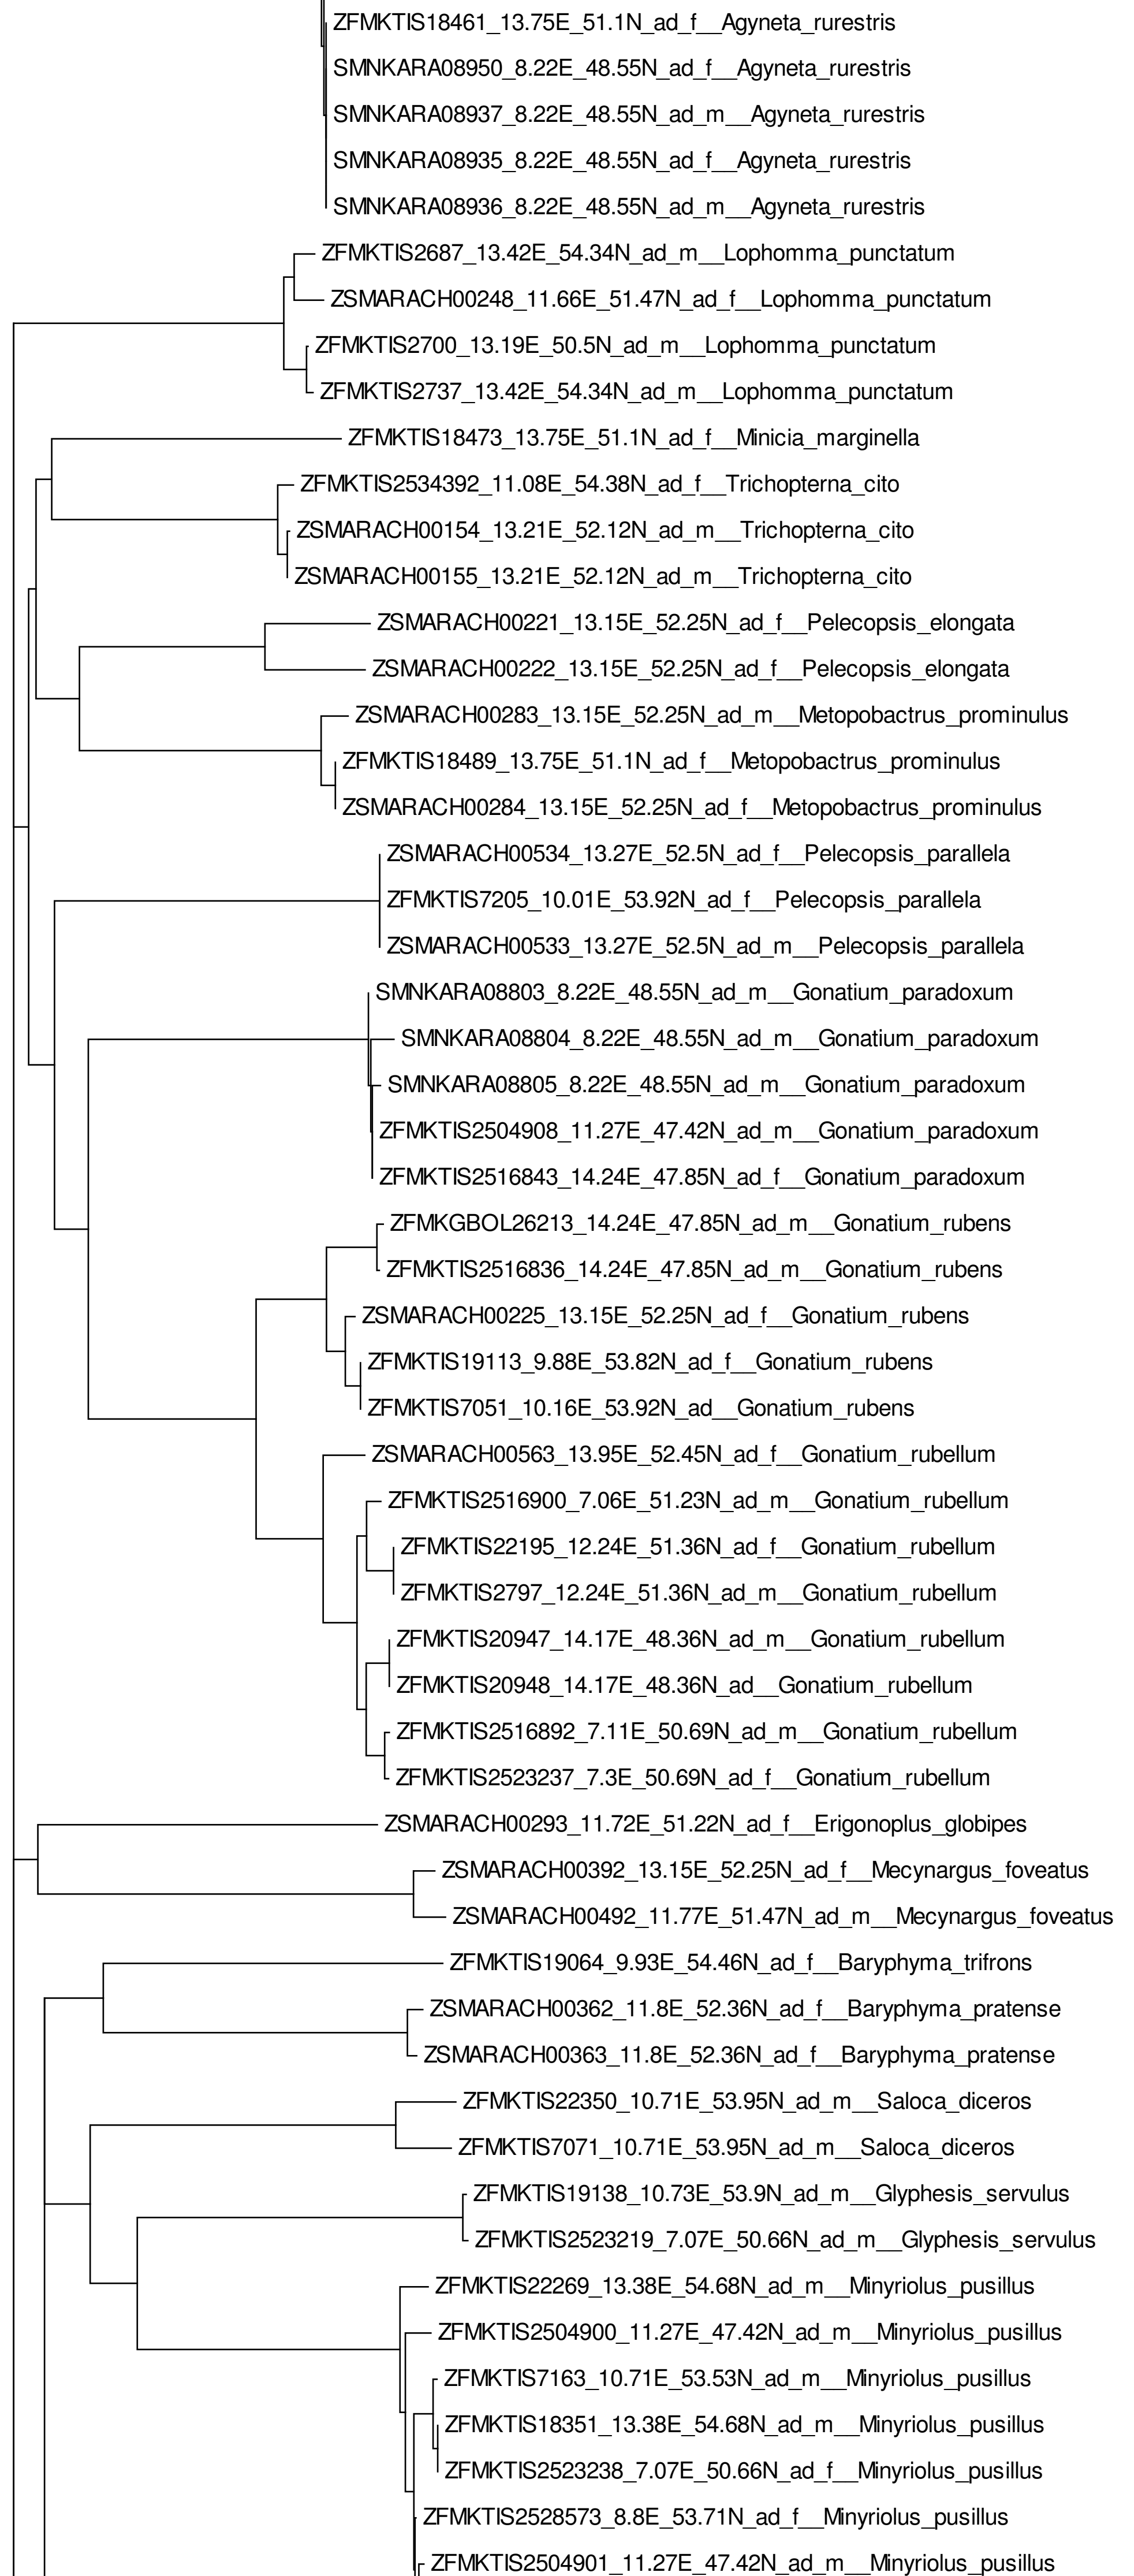

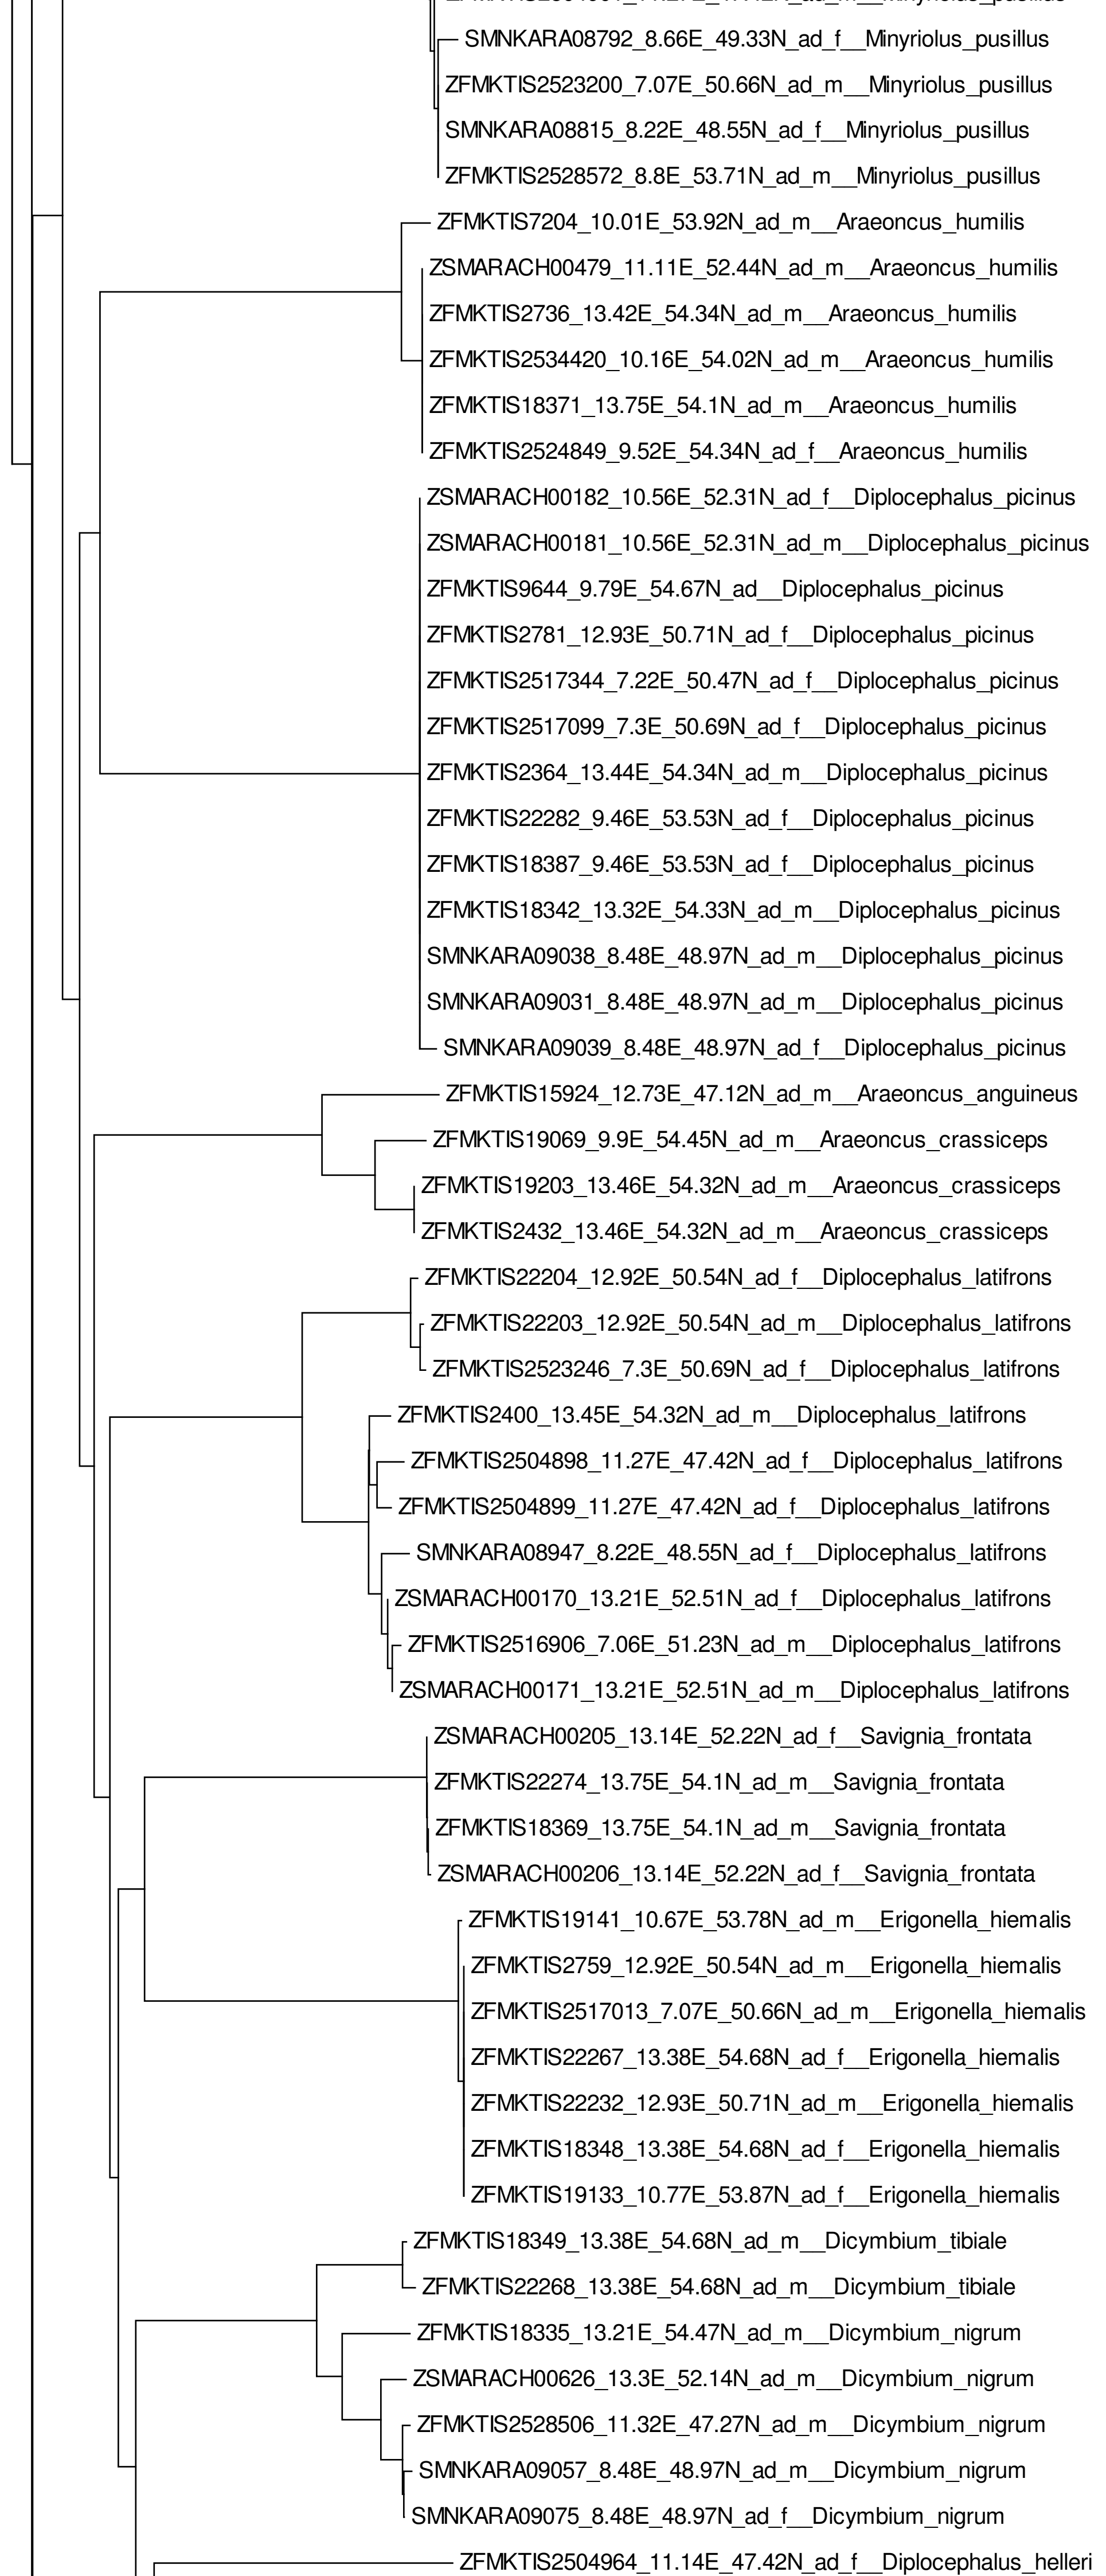



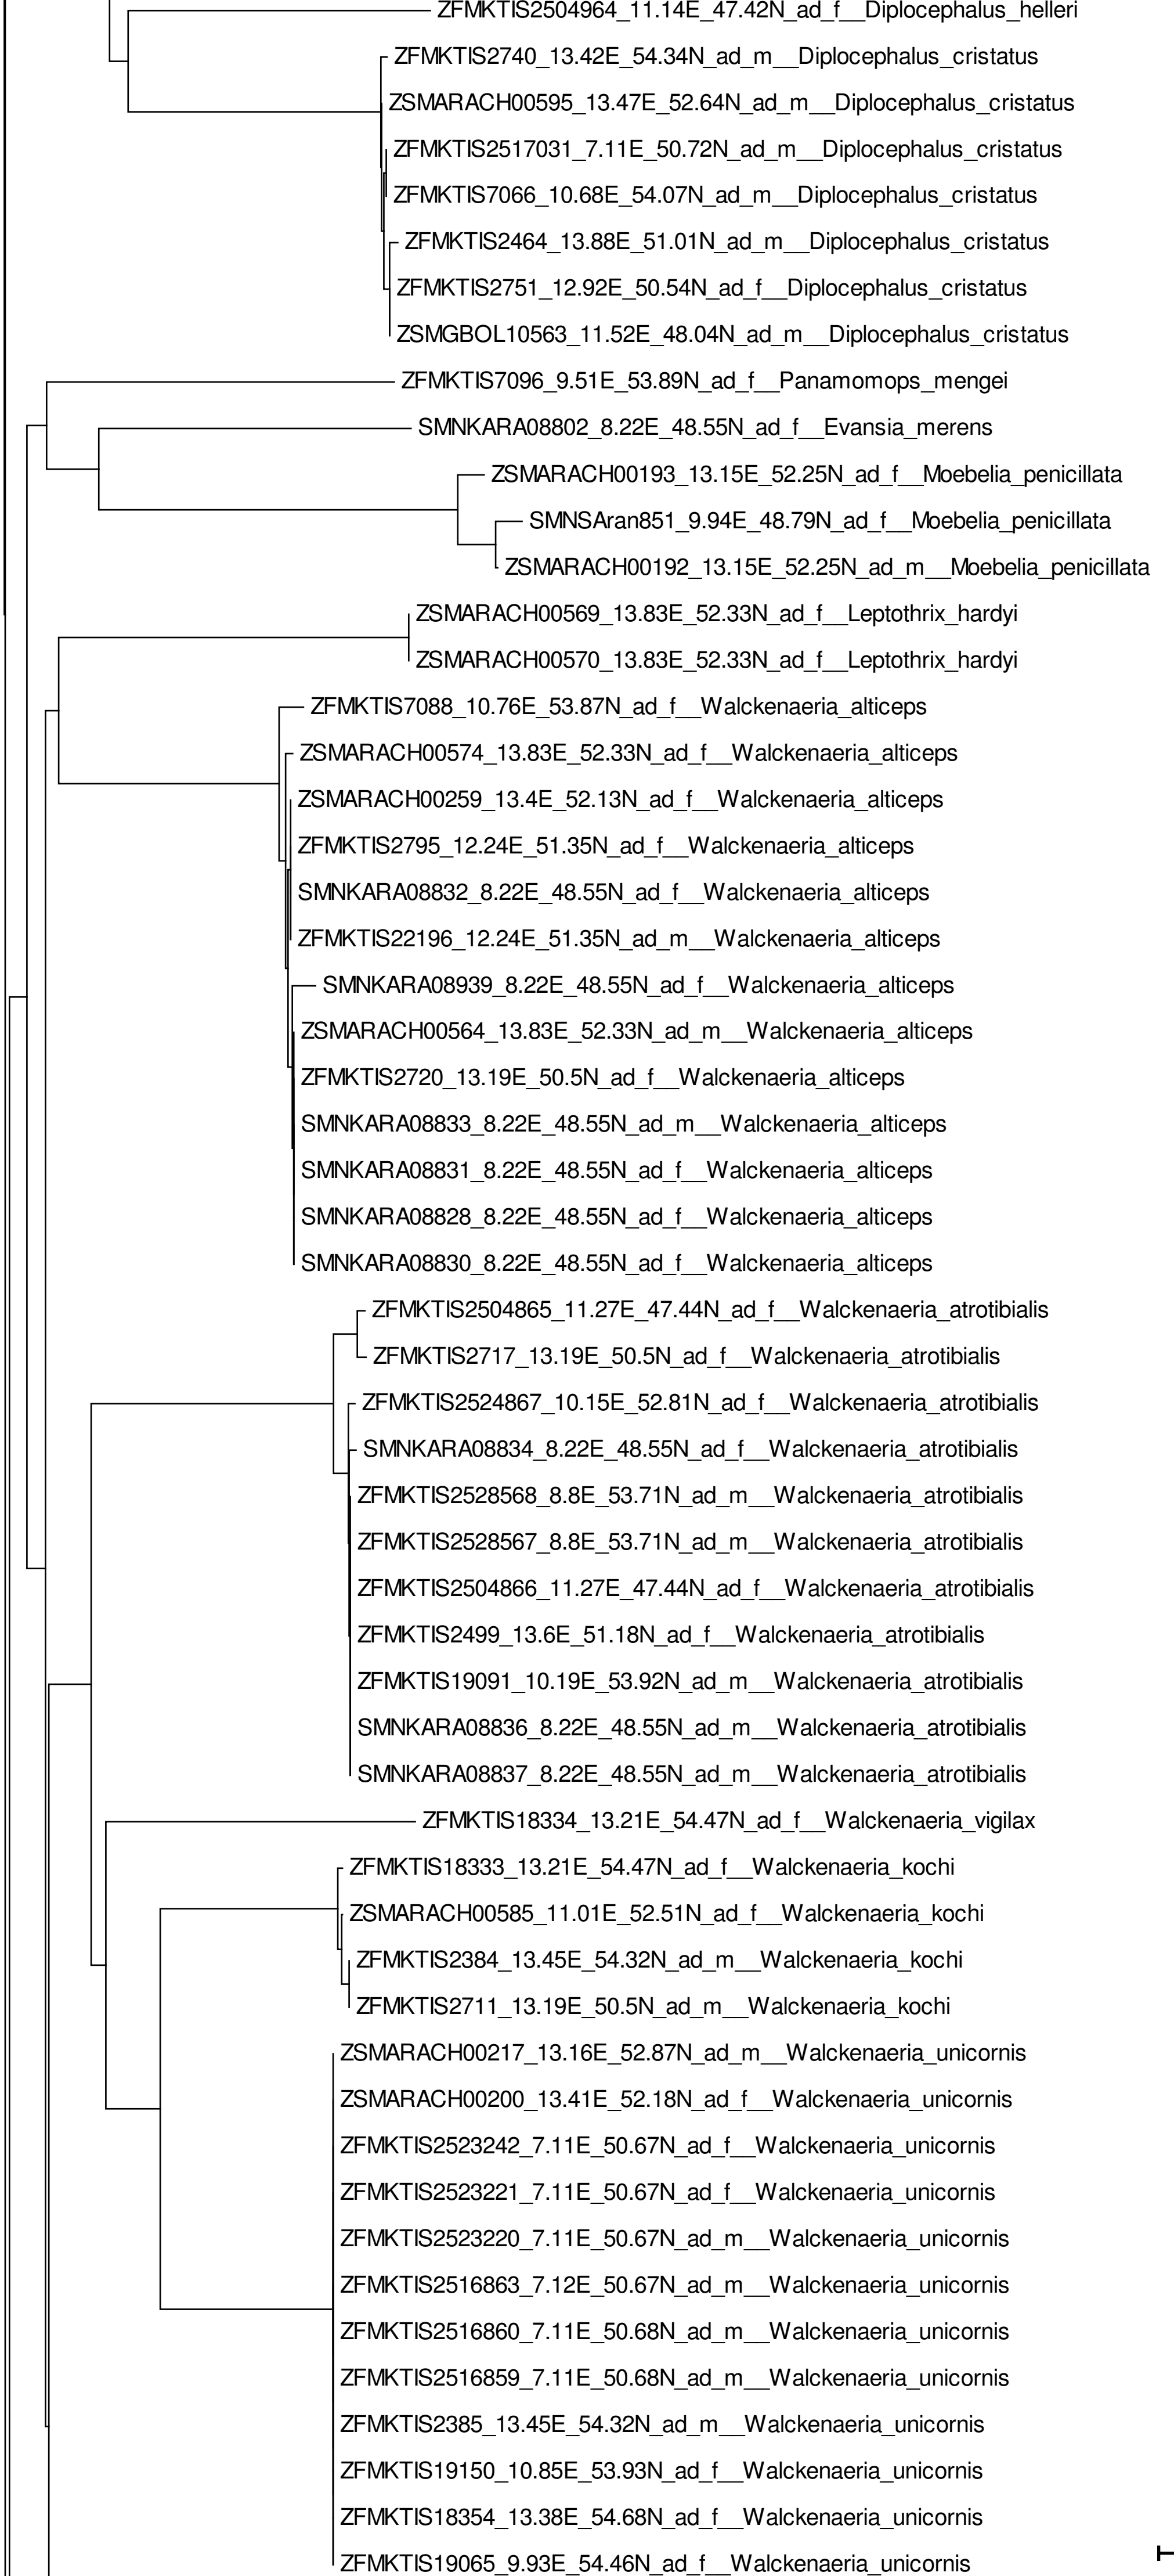

0.02

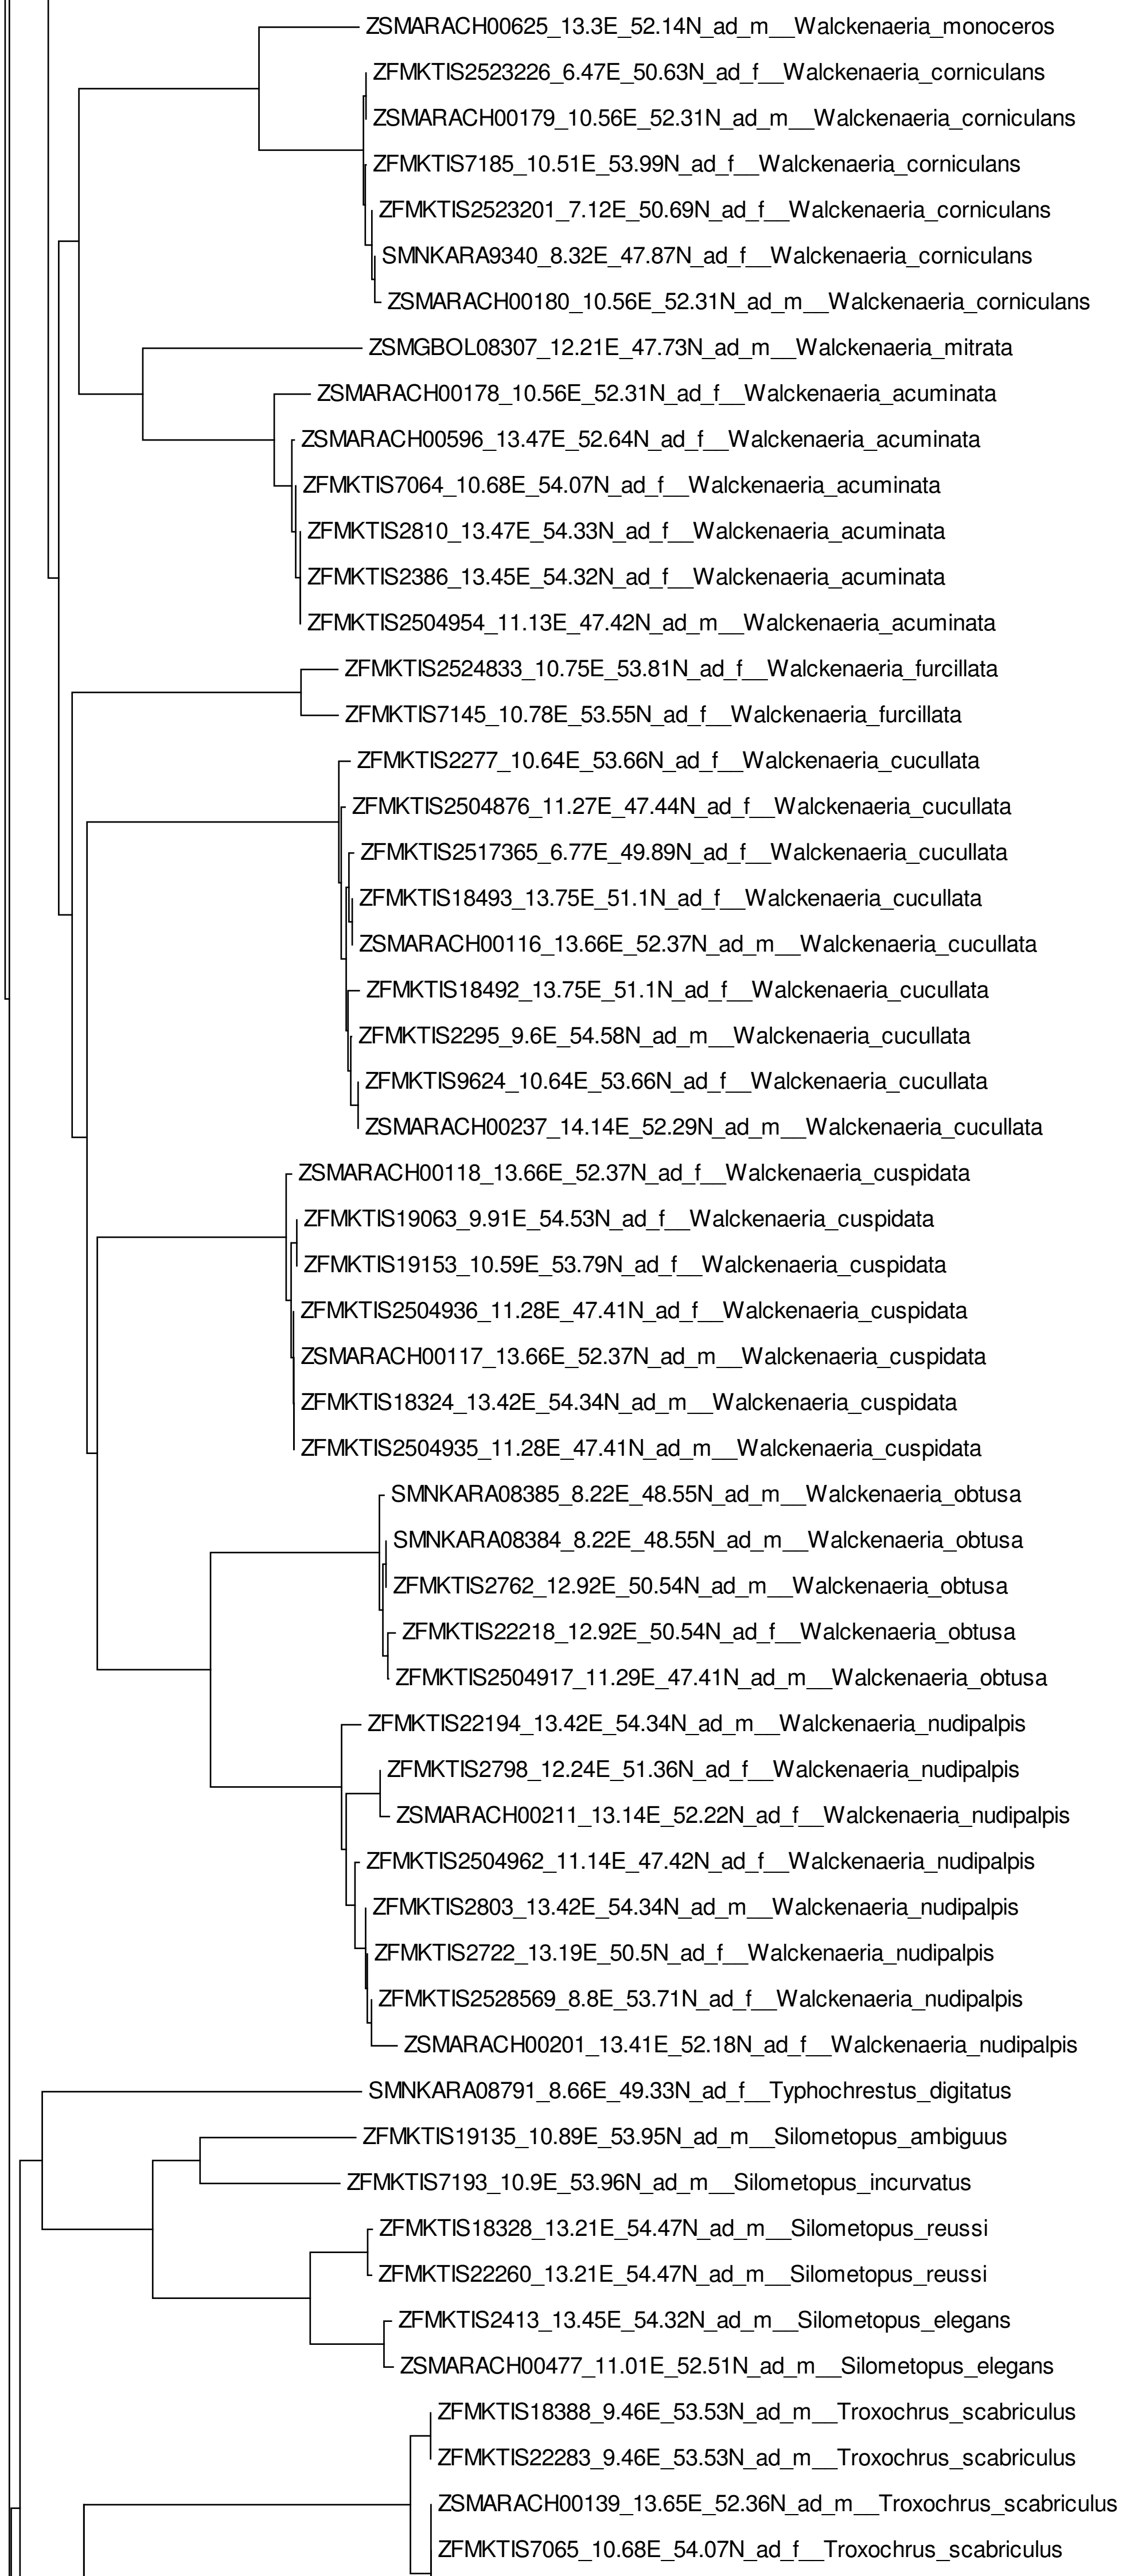

0.02



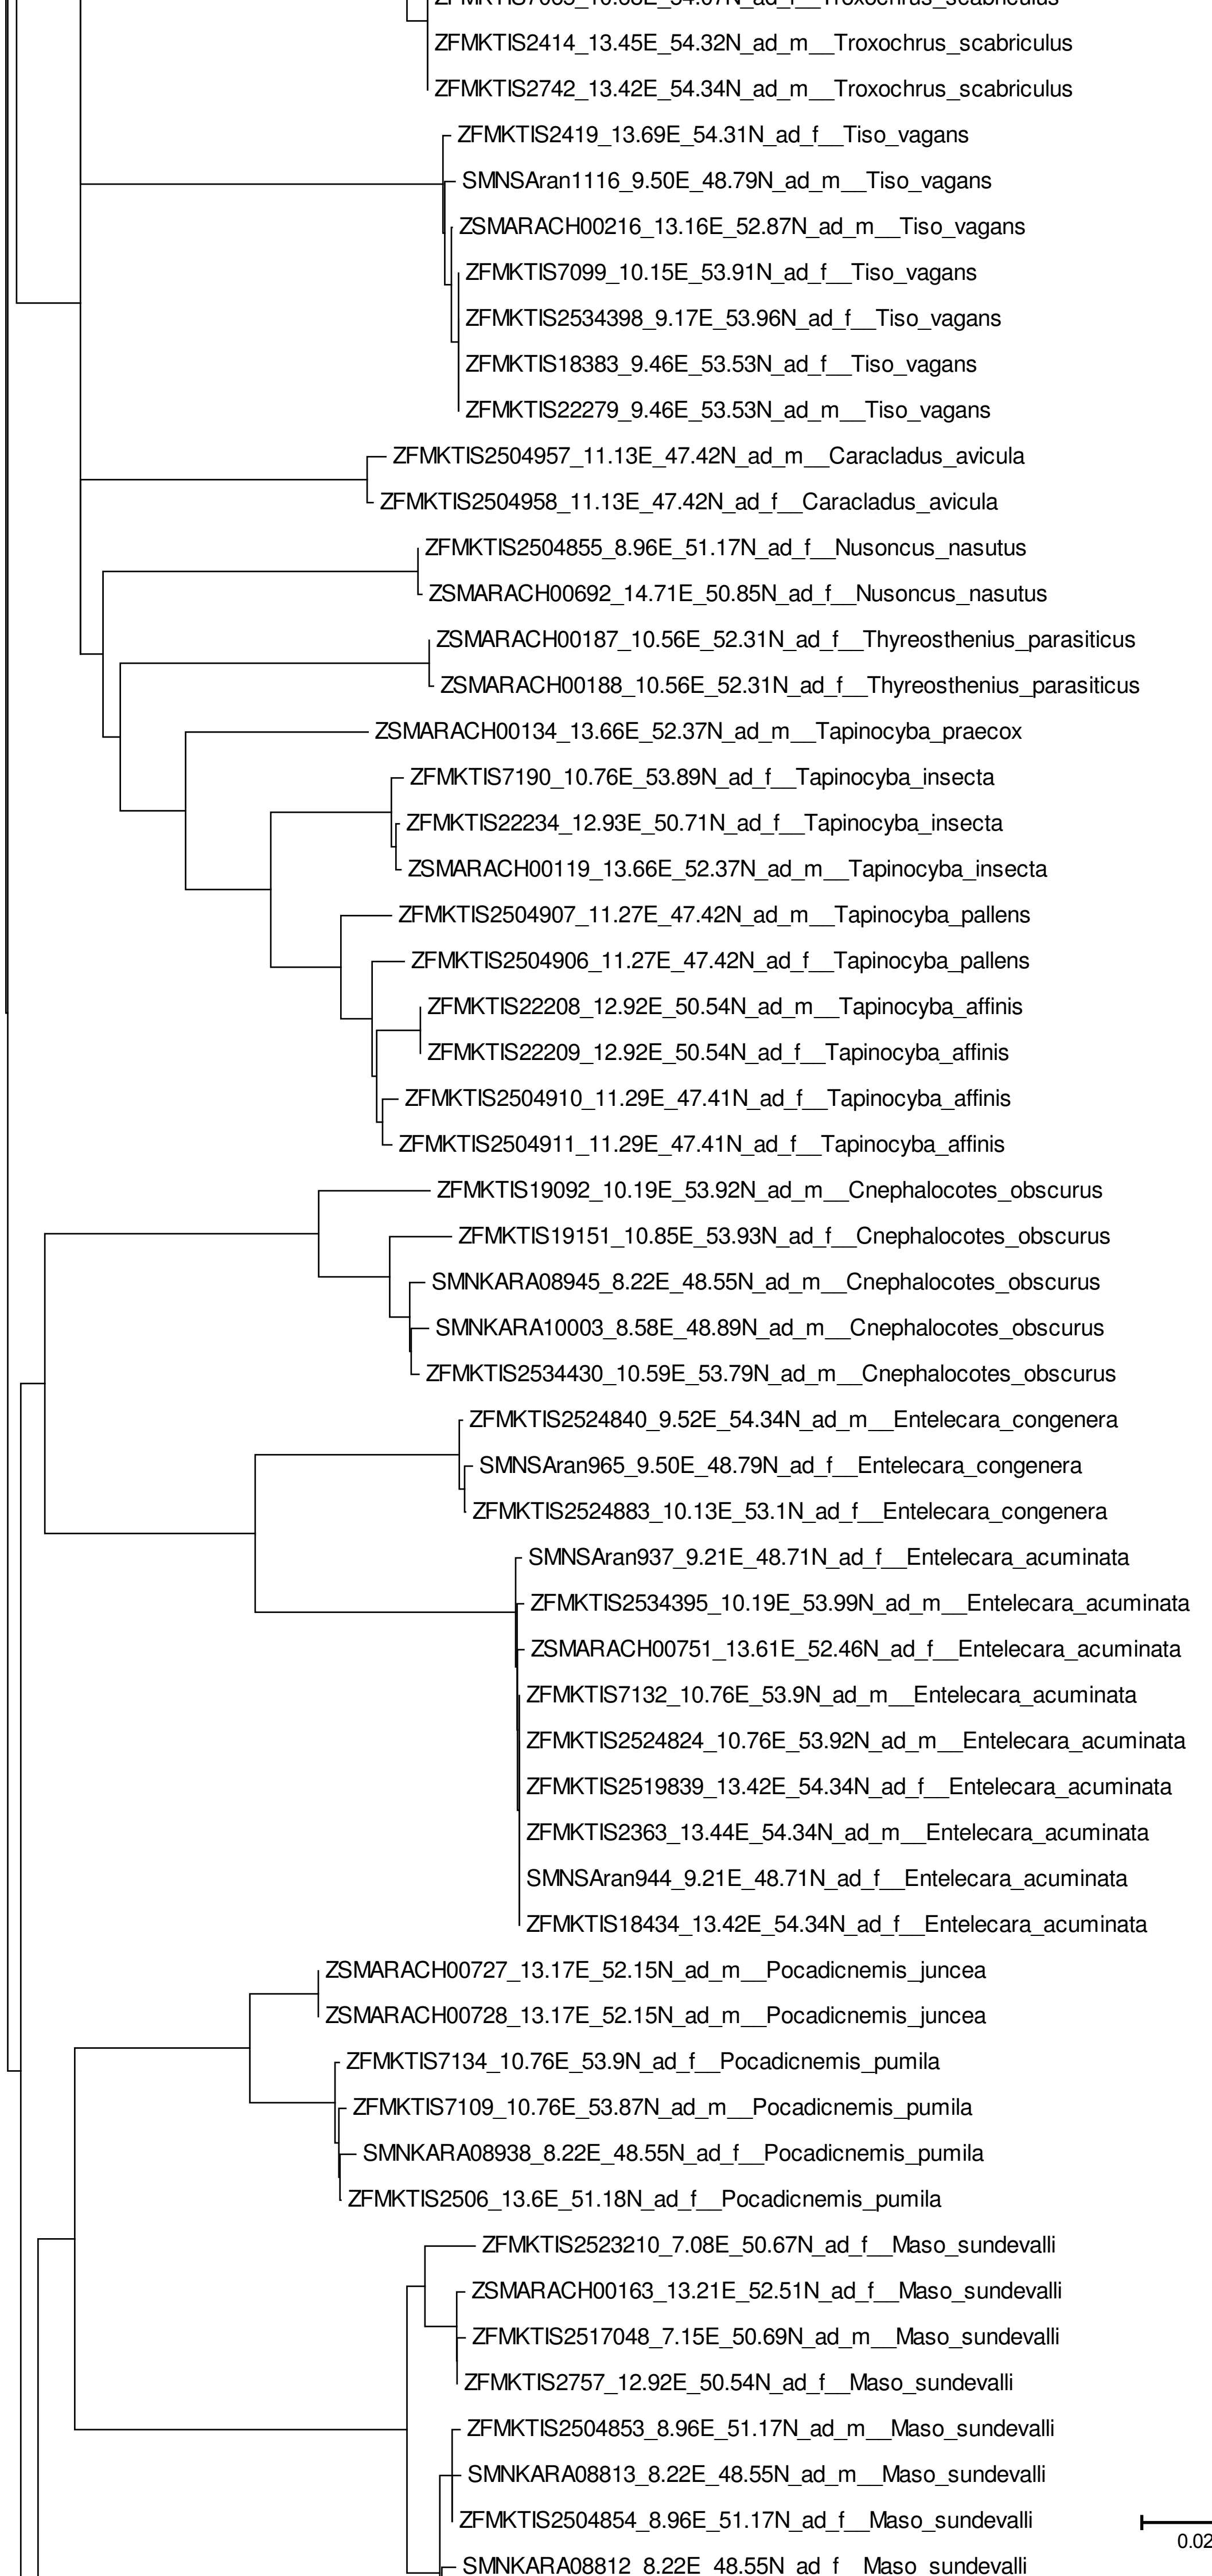

0.02

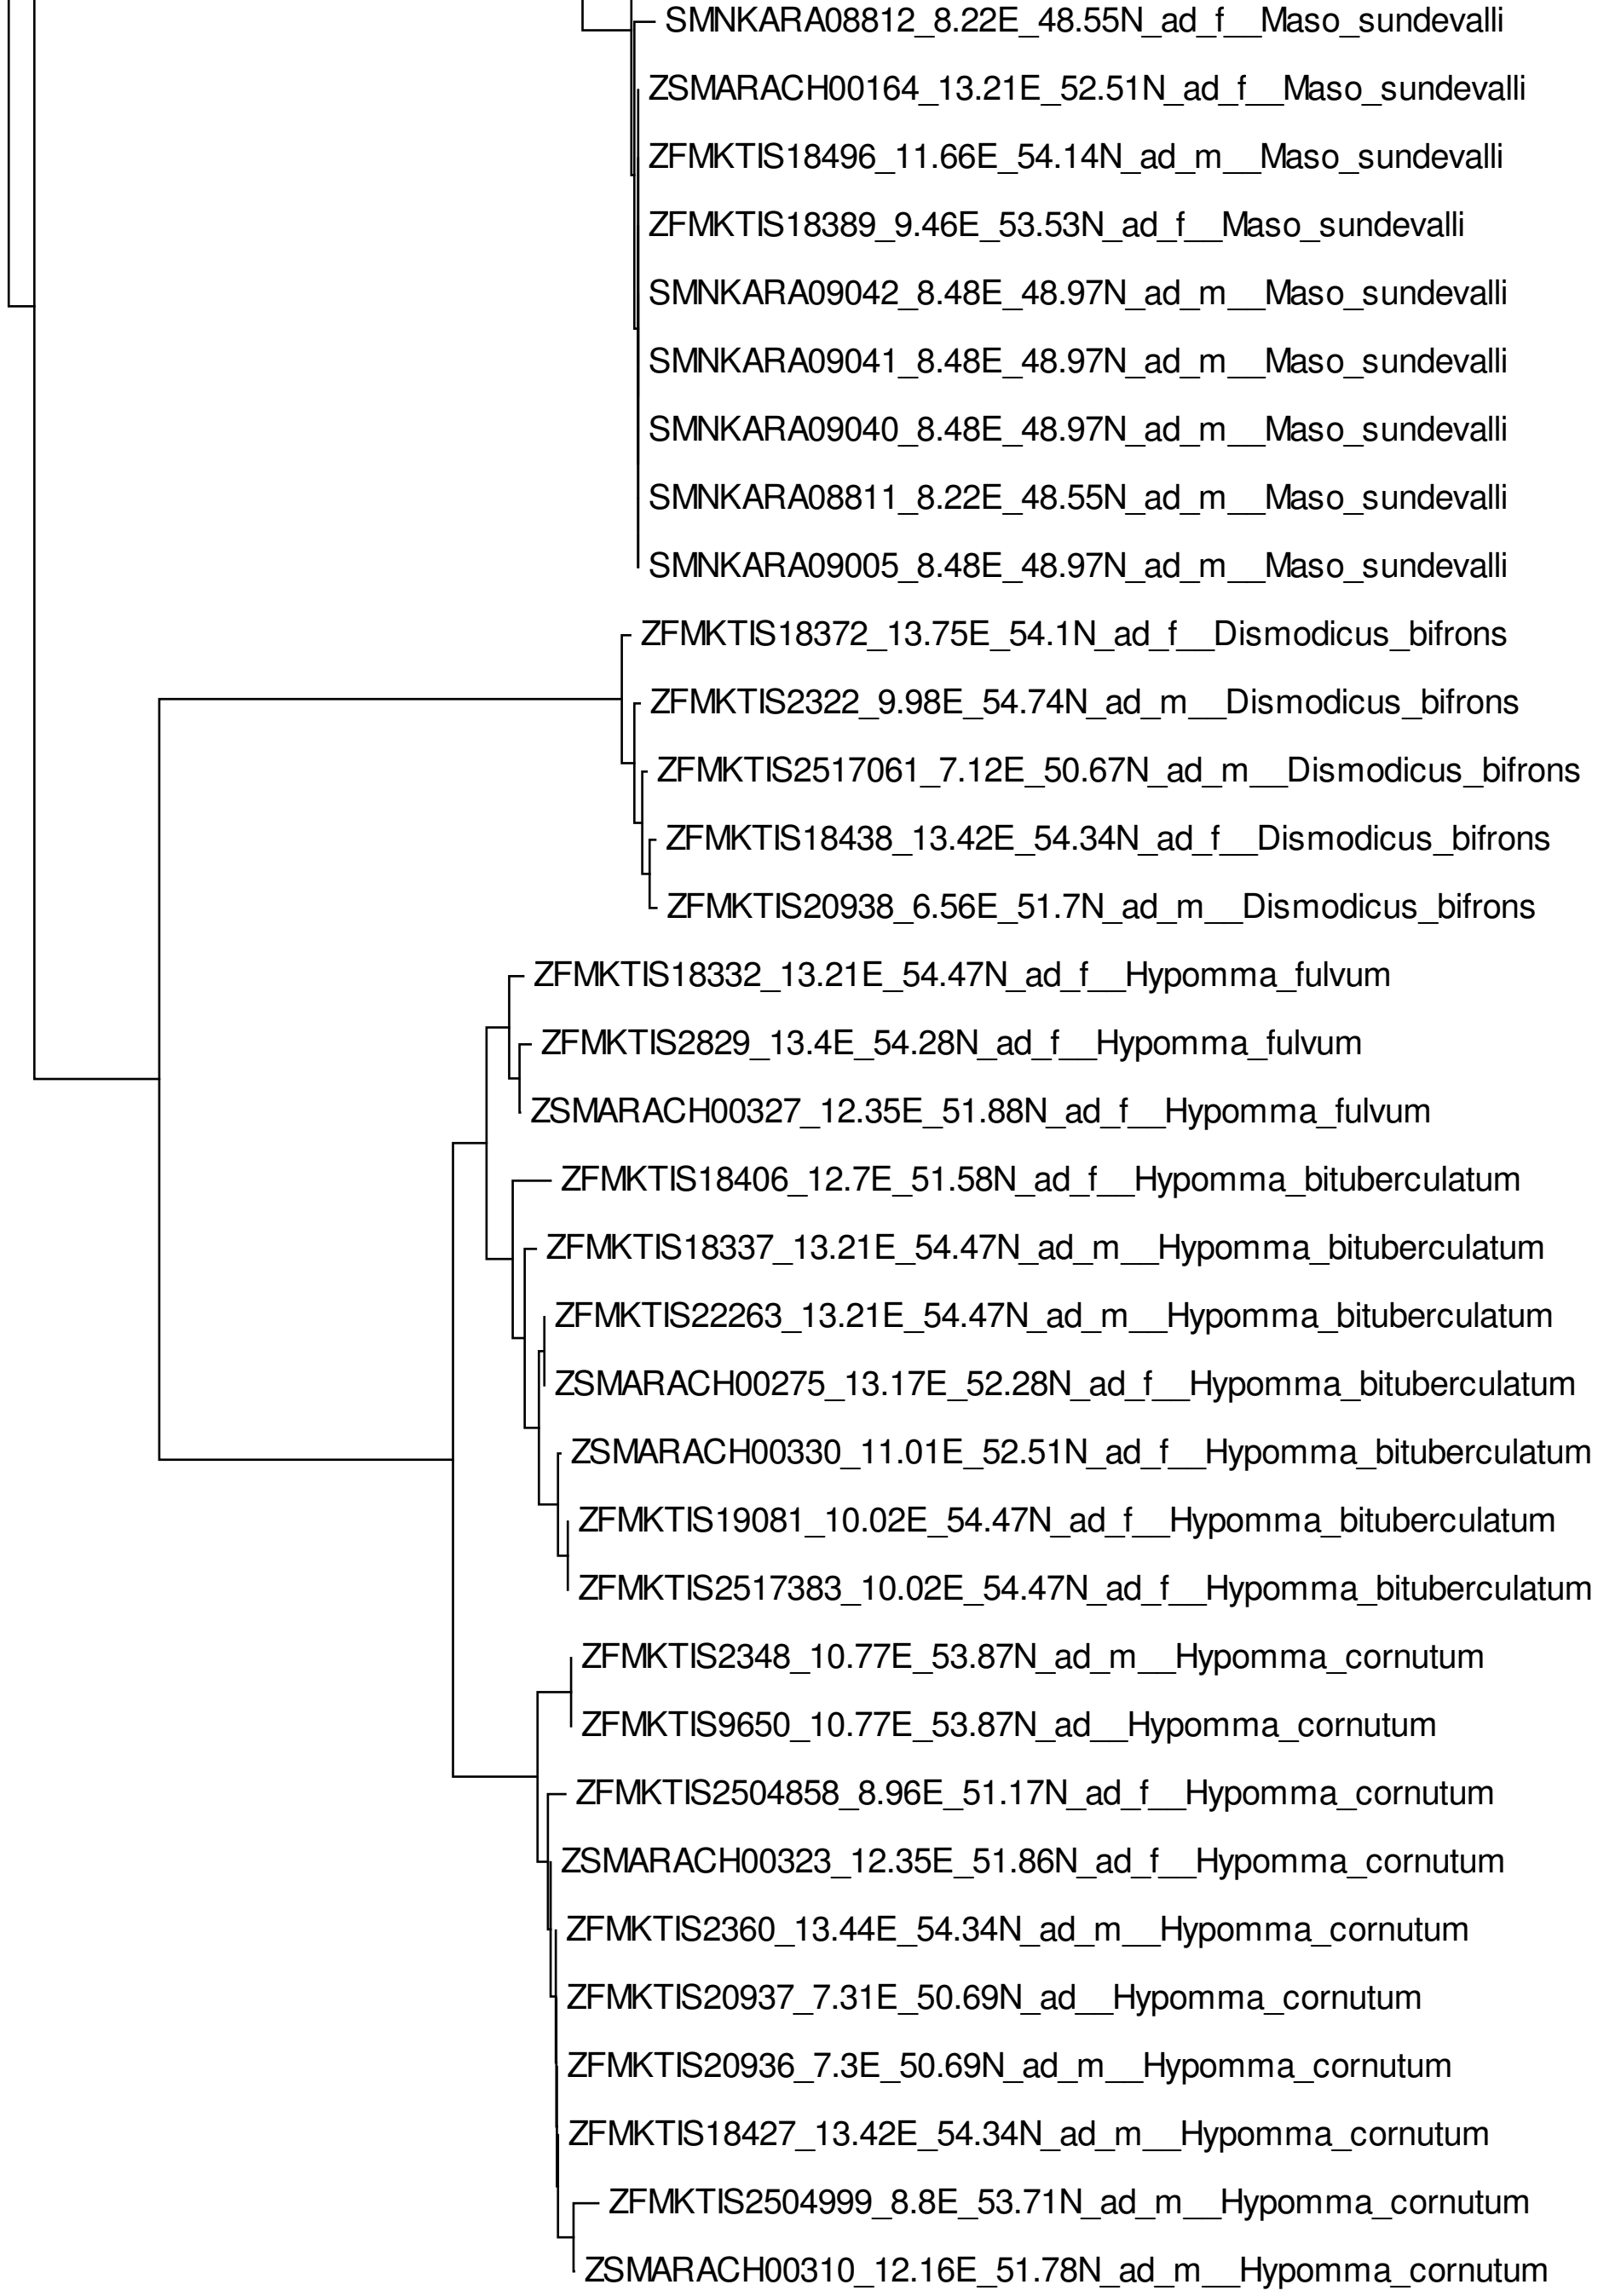

0.02

0.02
