# Supplementary material for: Towards a DNA Barcode Reference Database for Spiders and Harvestmen of Germany
Source: PubMed Central journal article supplement (PMC5040438; doi:10.1371/journal.pone.0162624), 2016-09-28
Supplement: pone.0162624.s003.pdf [file pone.0162624.s003.pdf]

BOLDMSACA57112 OG Acari

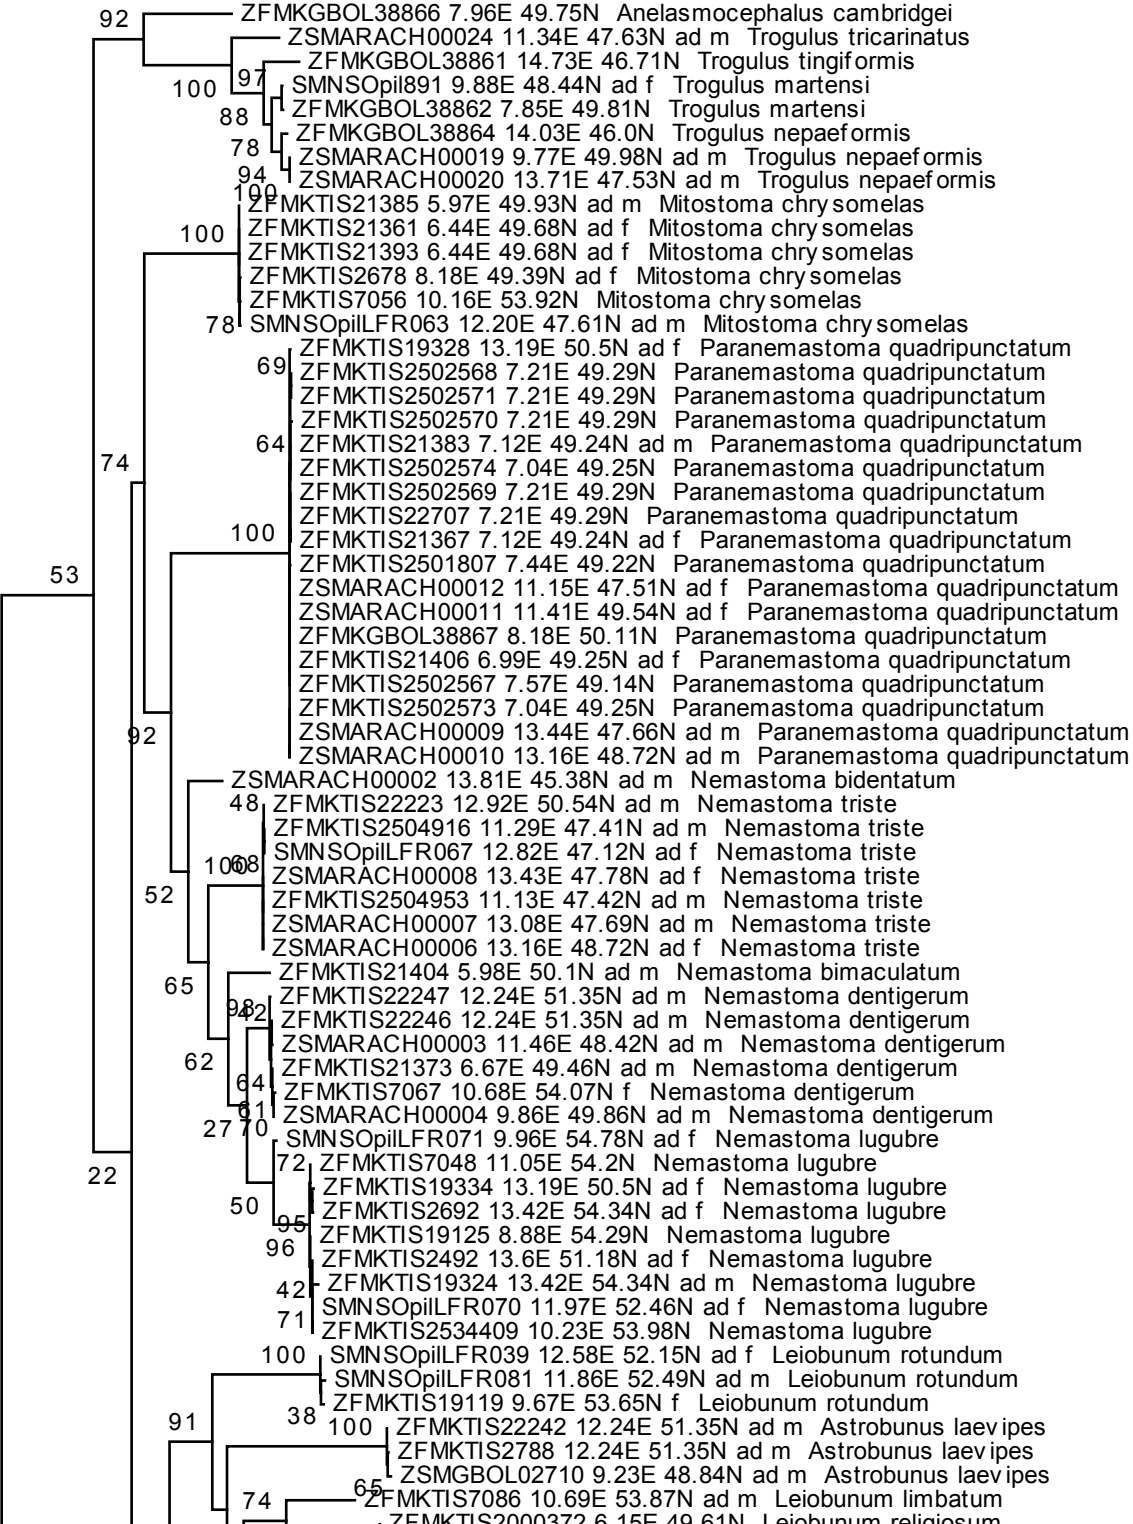

0.5

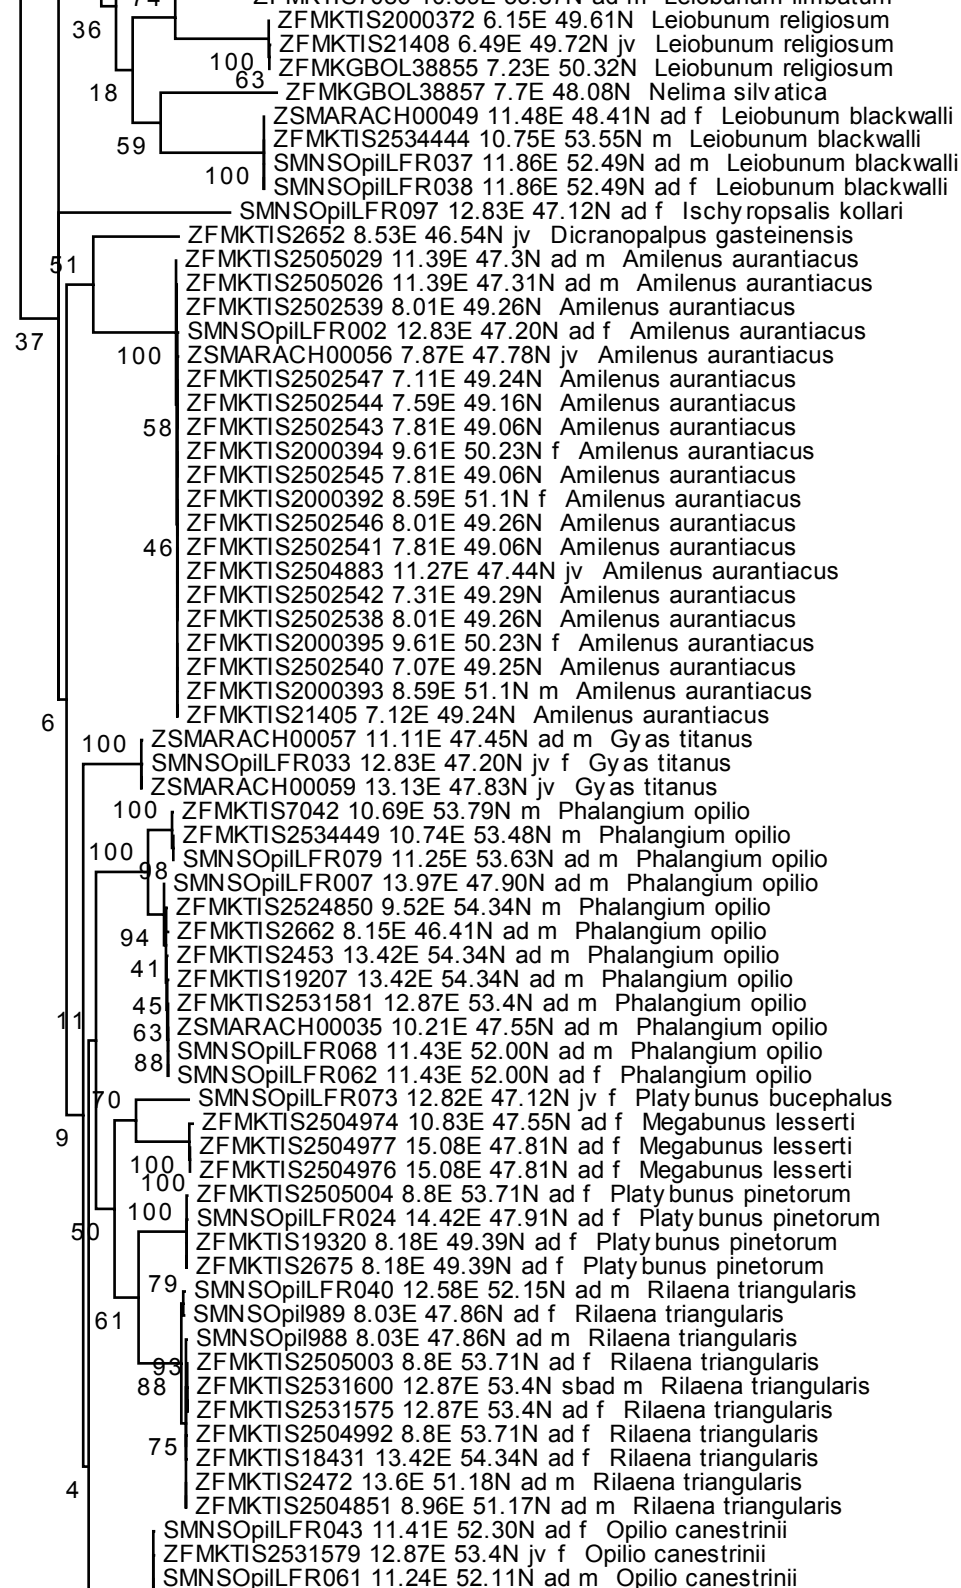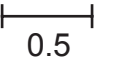

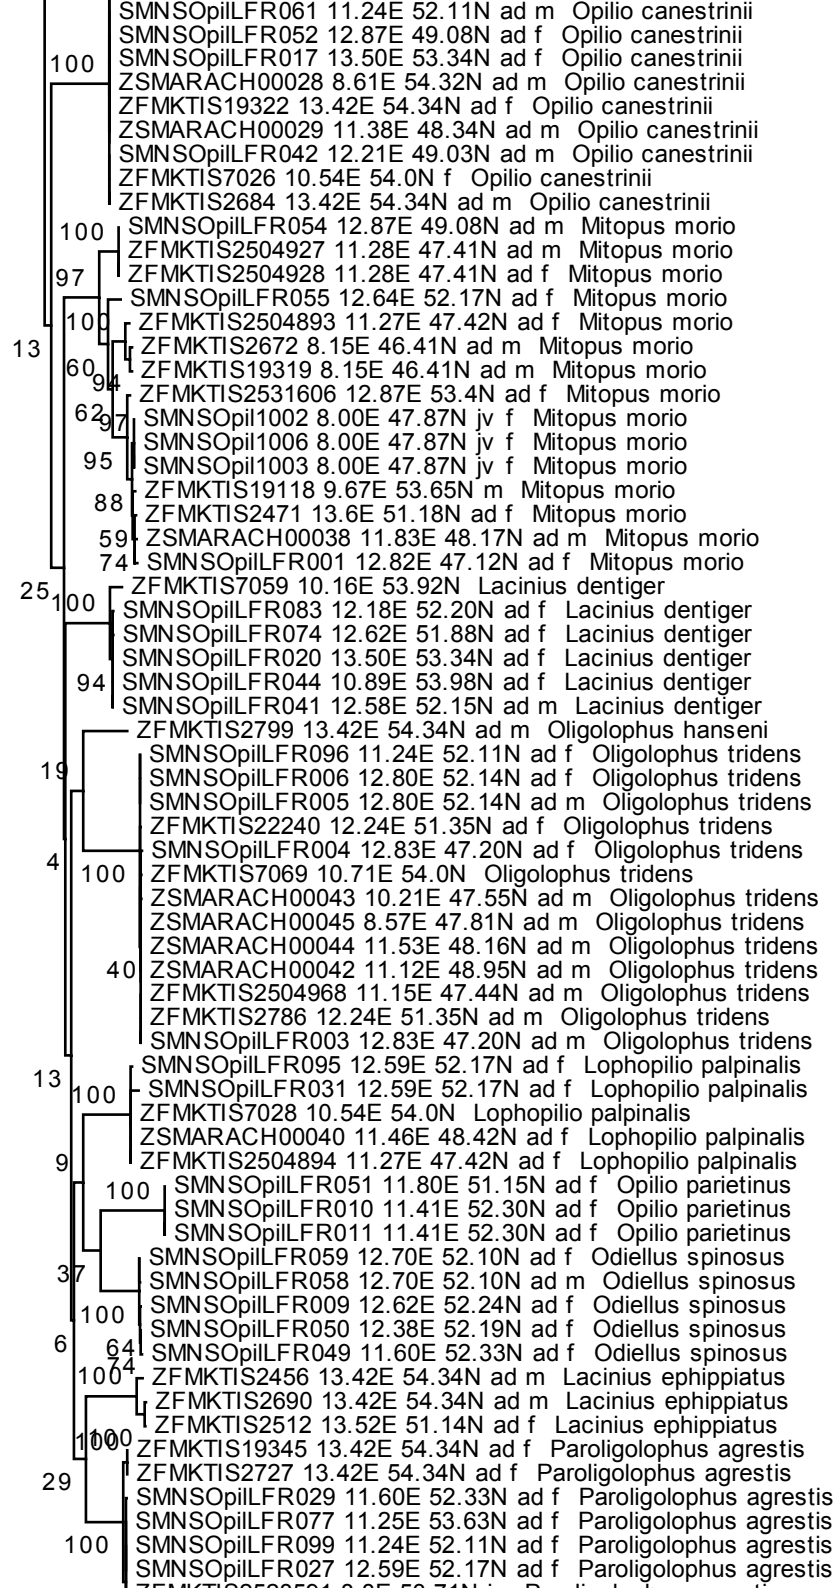

0.5

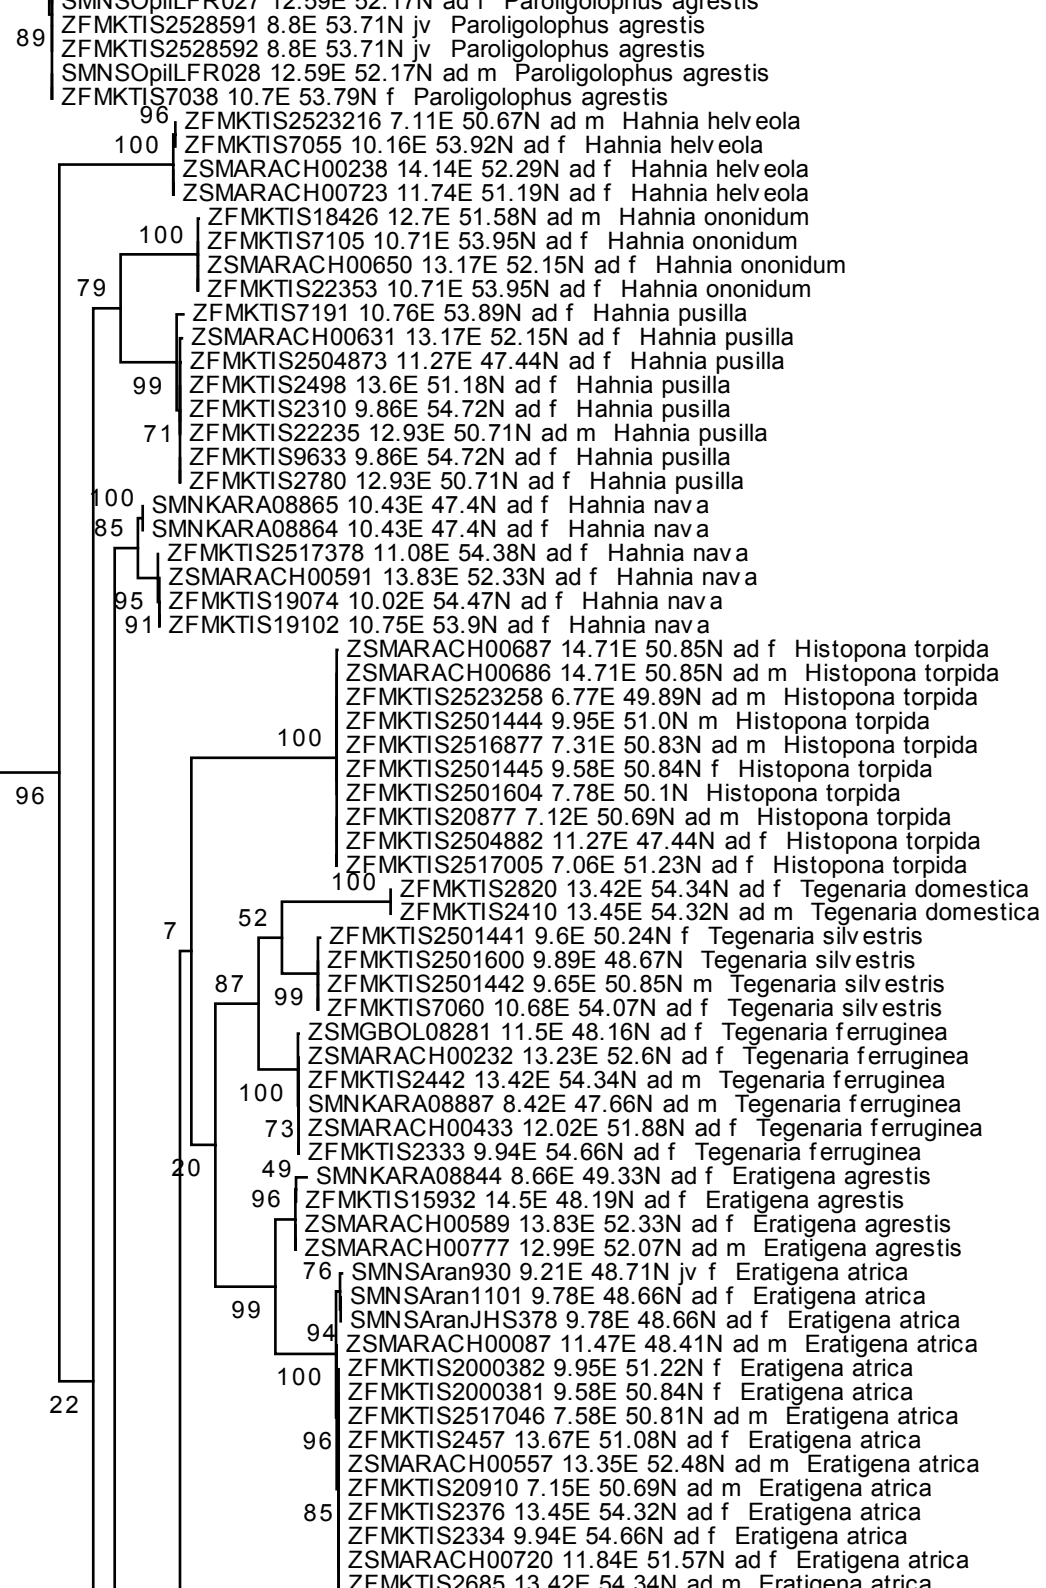



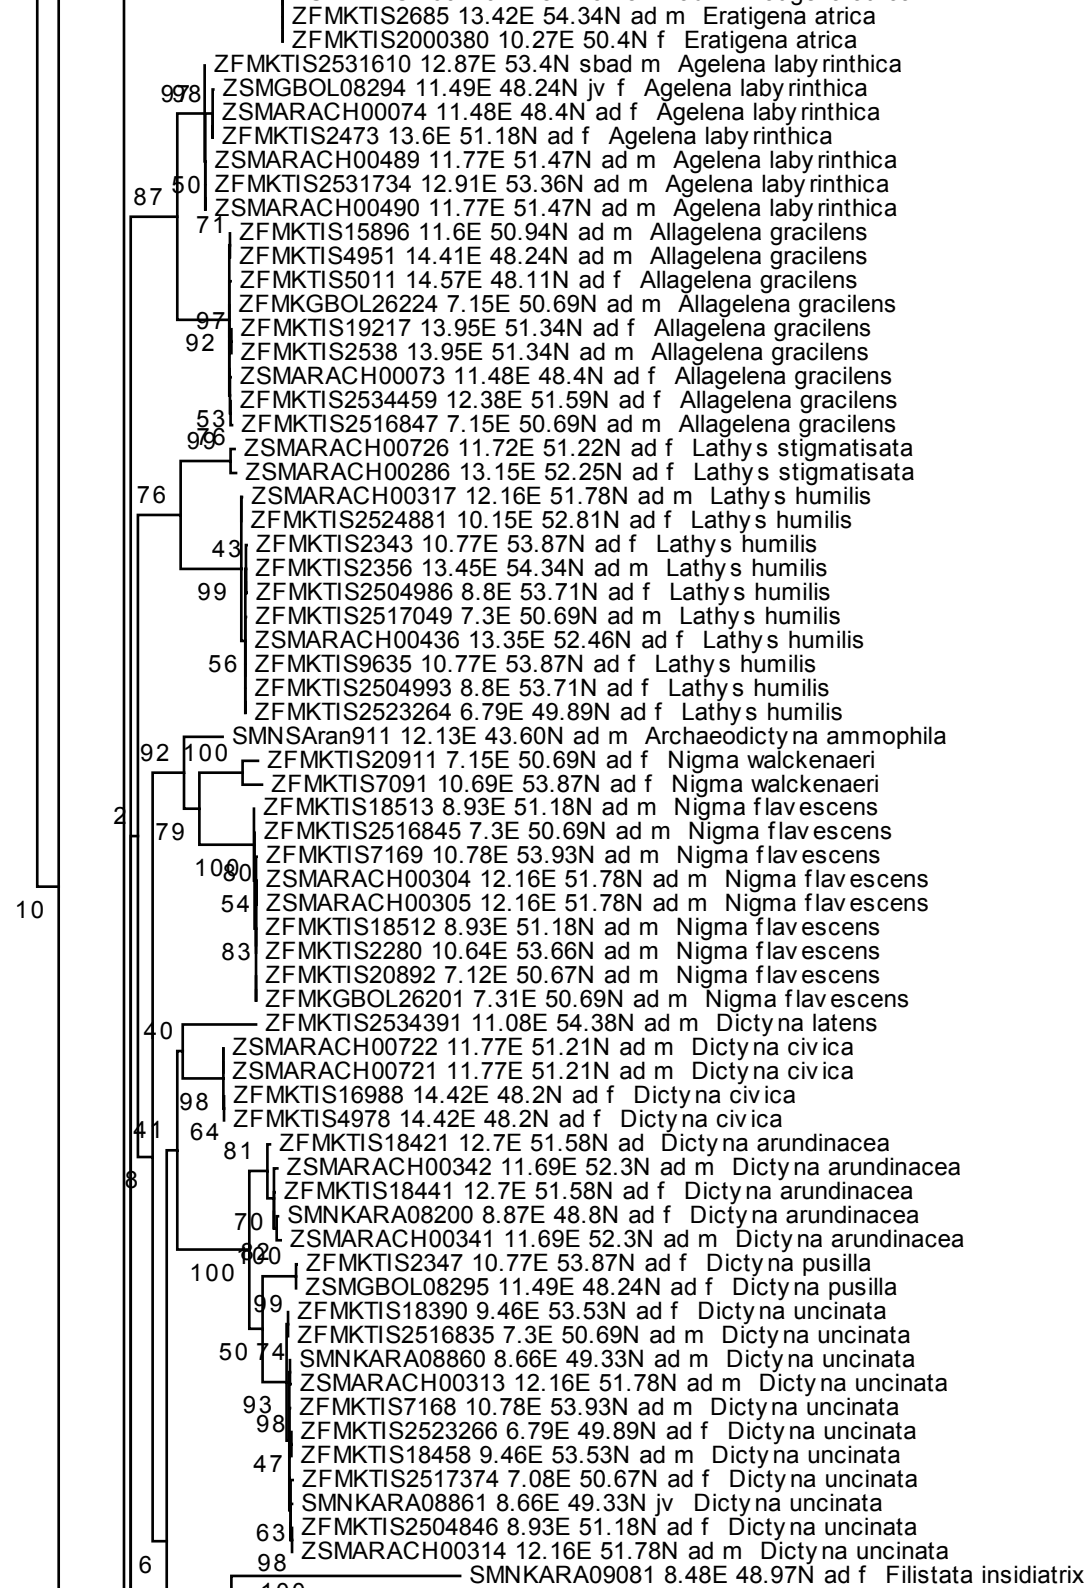

0.5

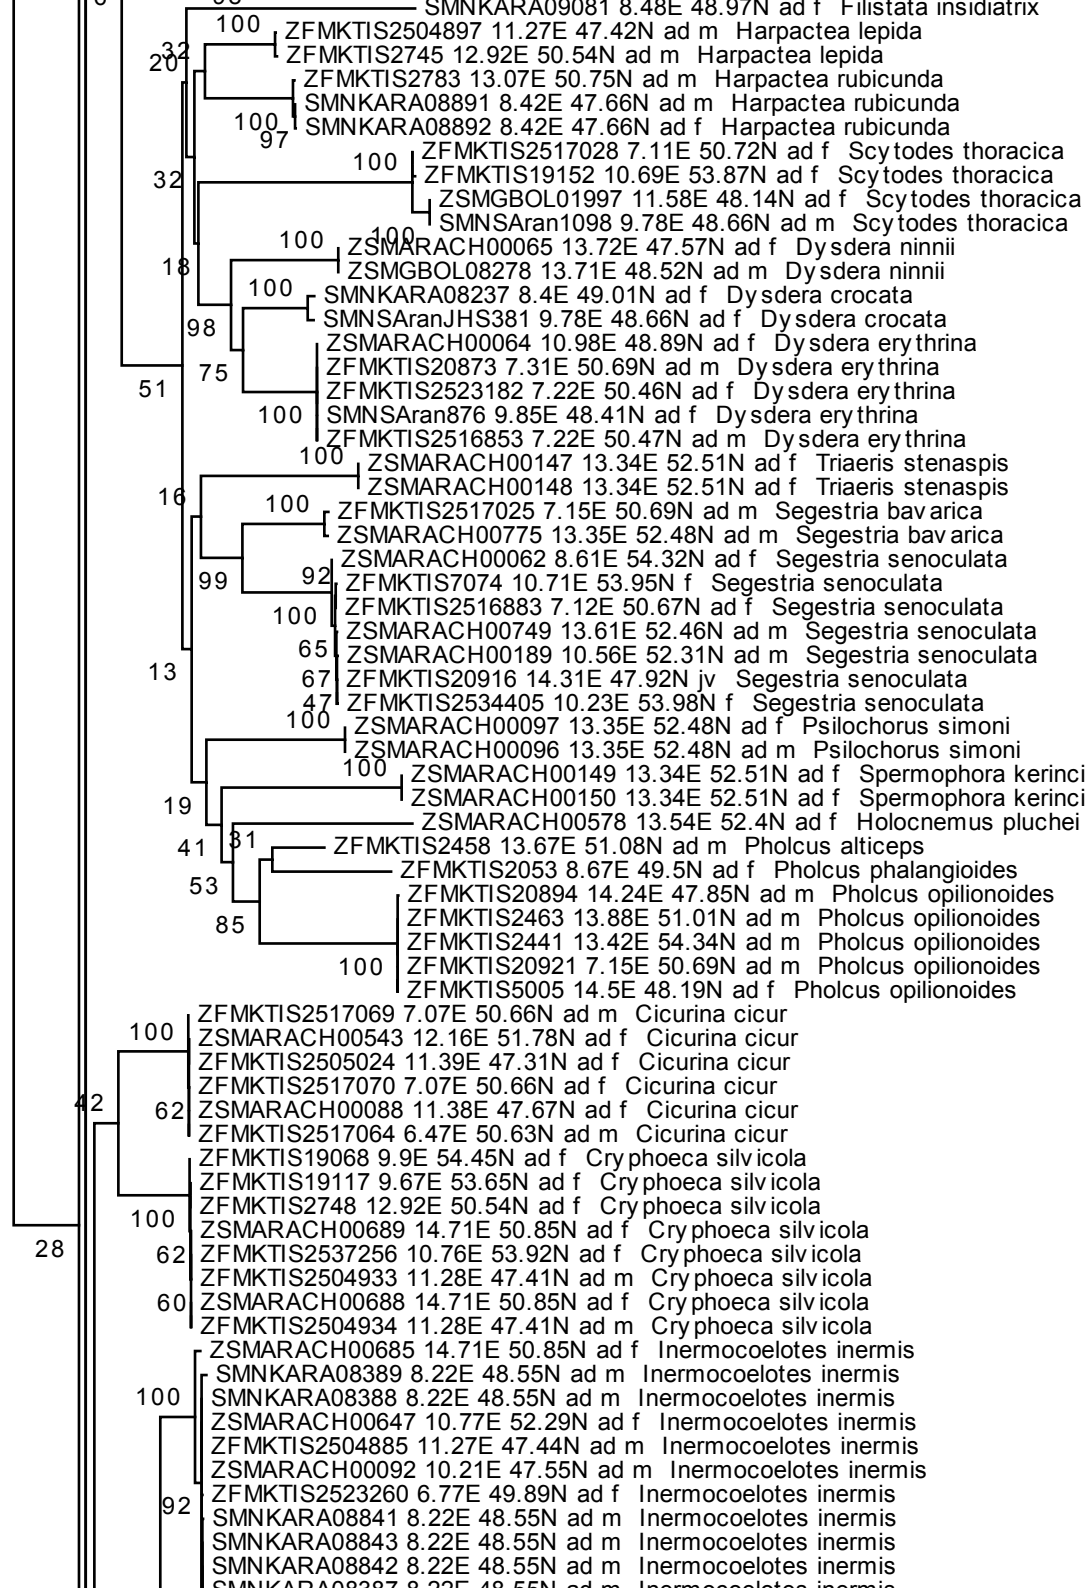

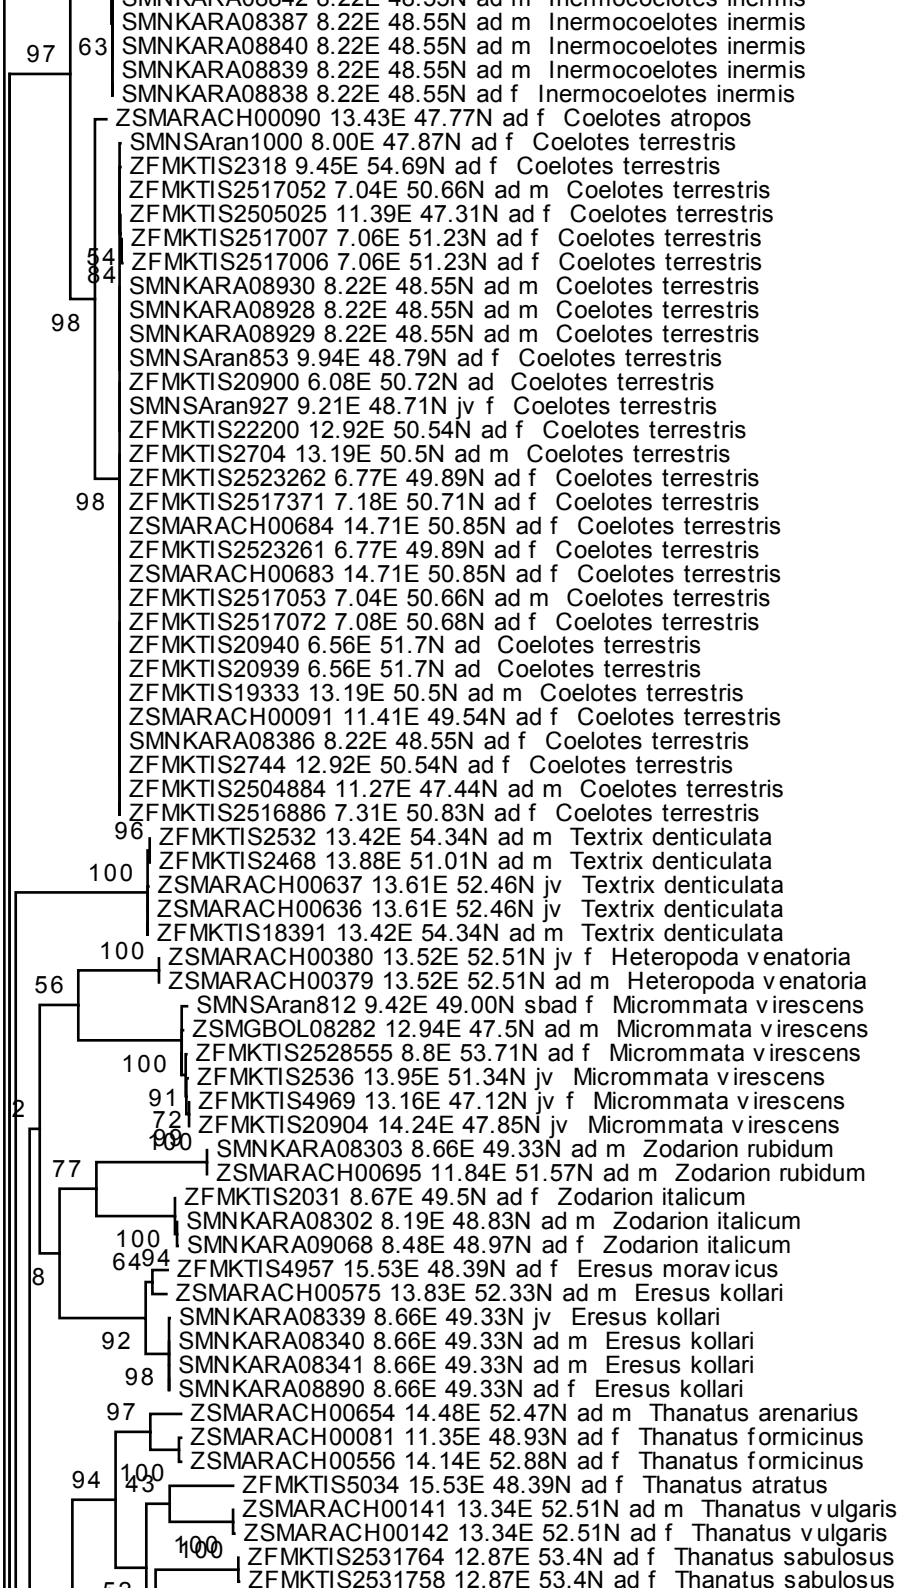

0.5

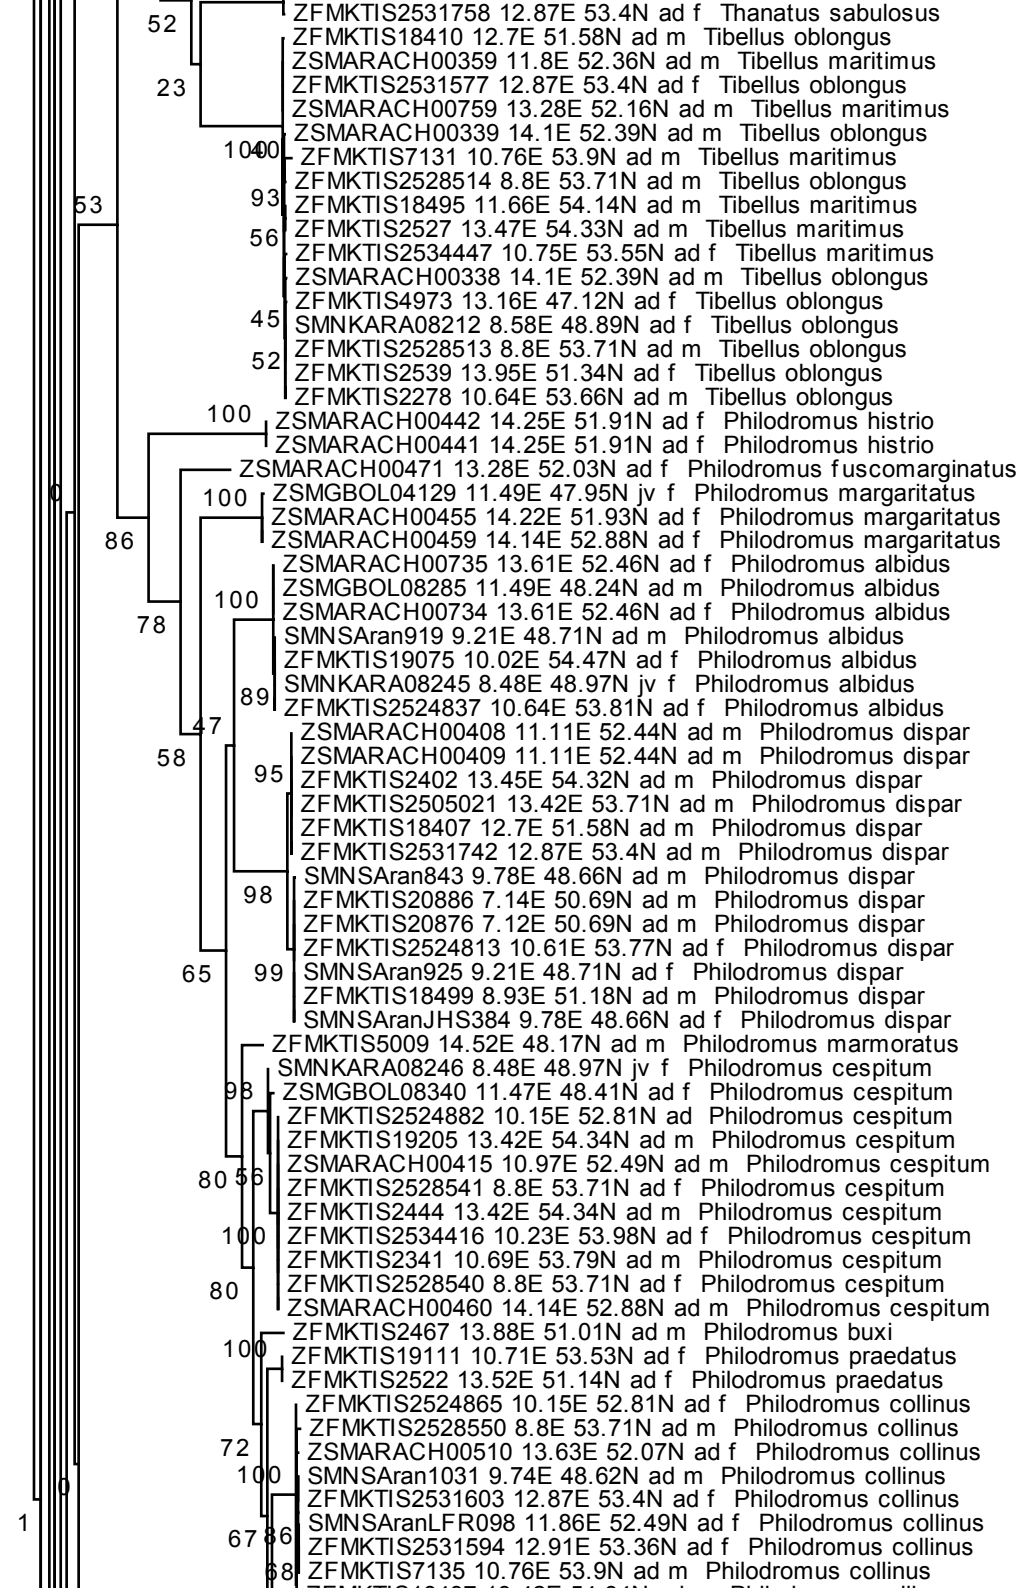

0.5



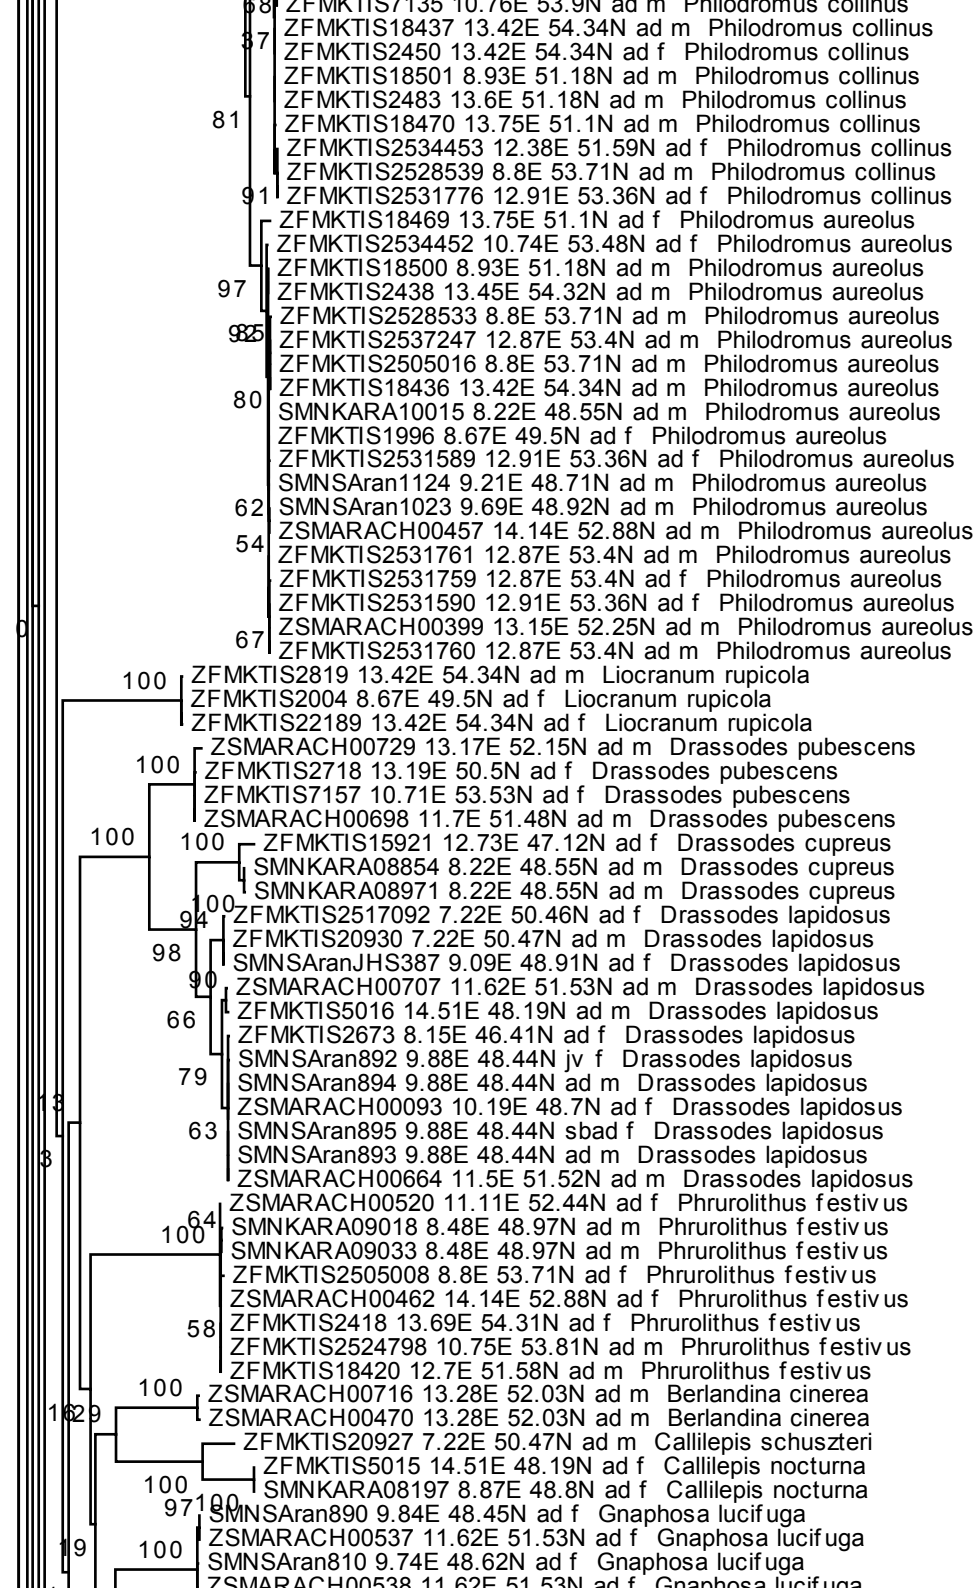

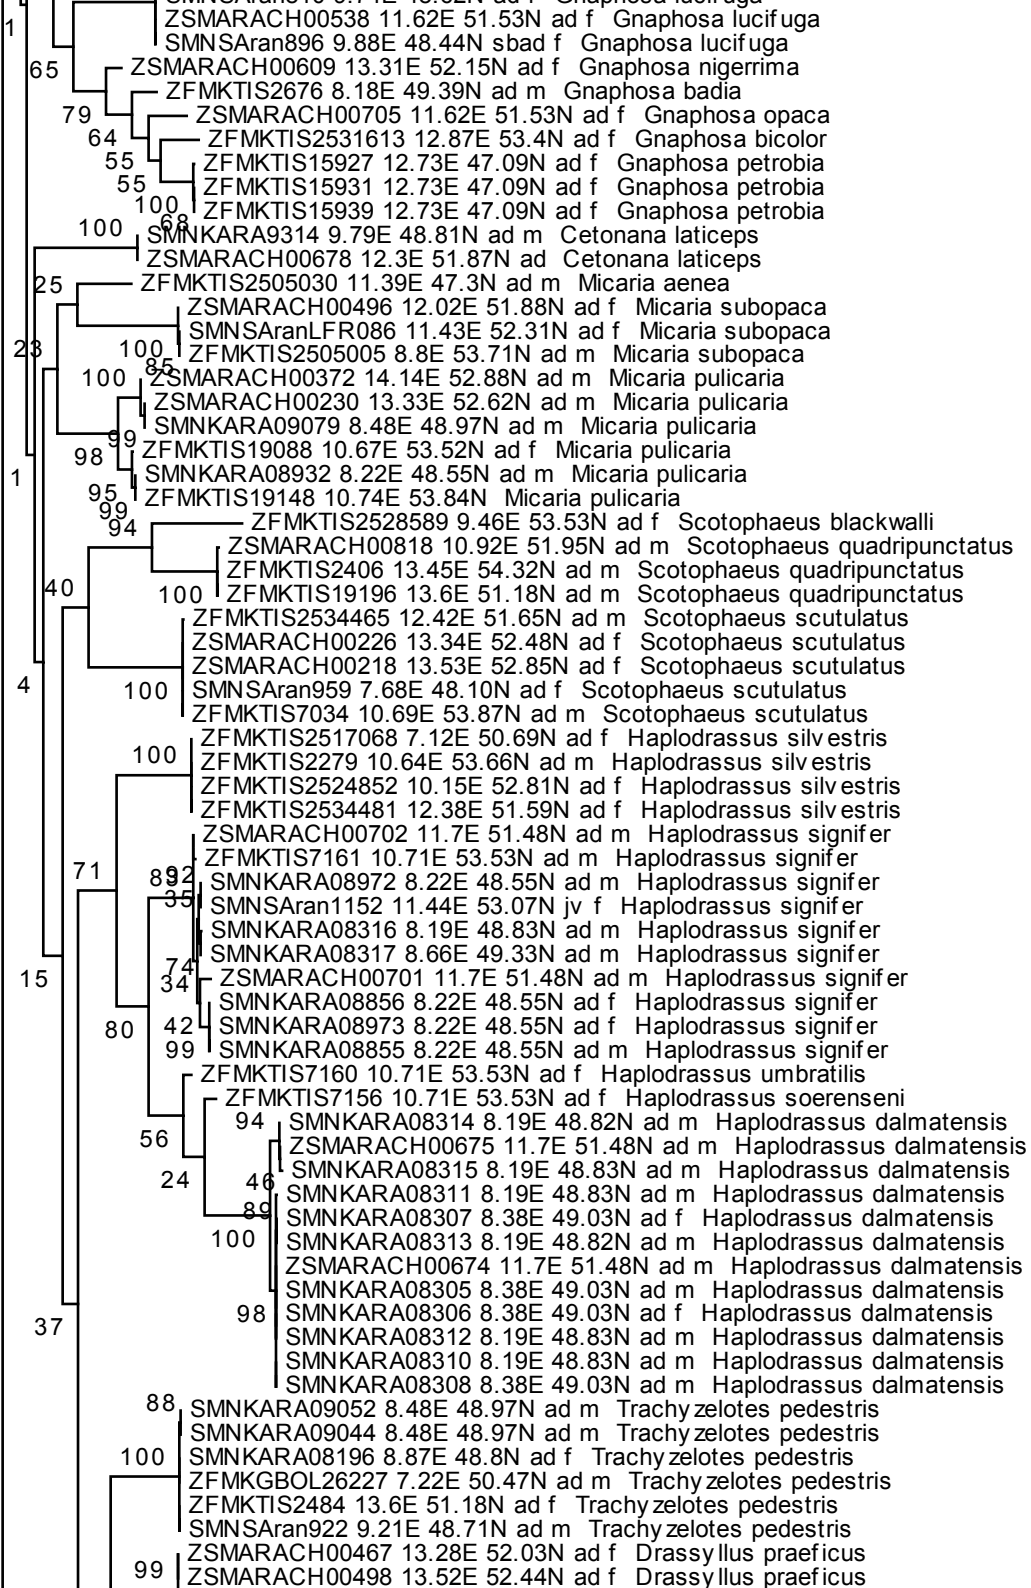

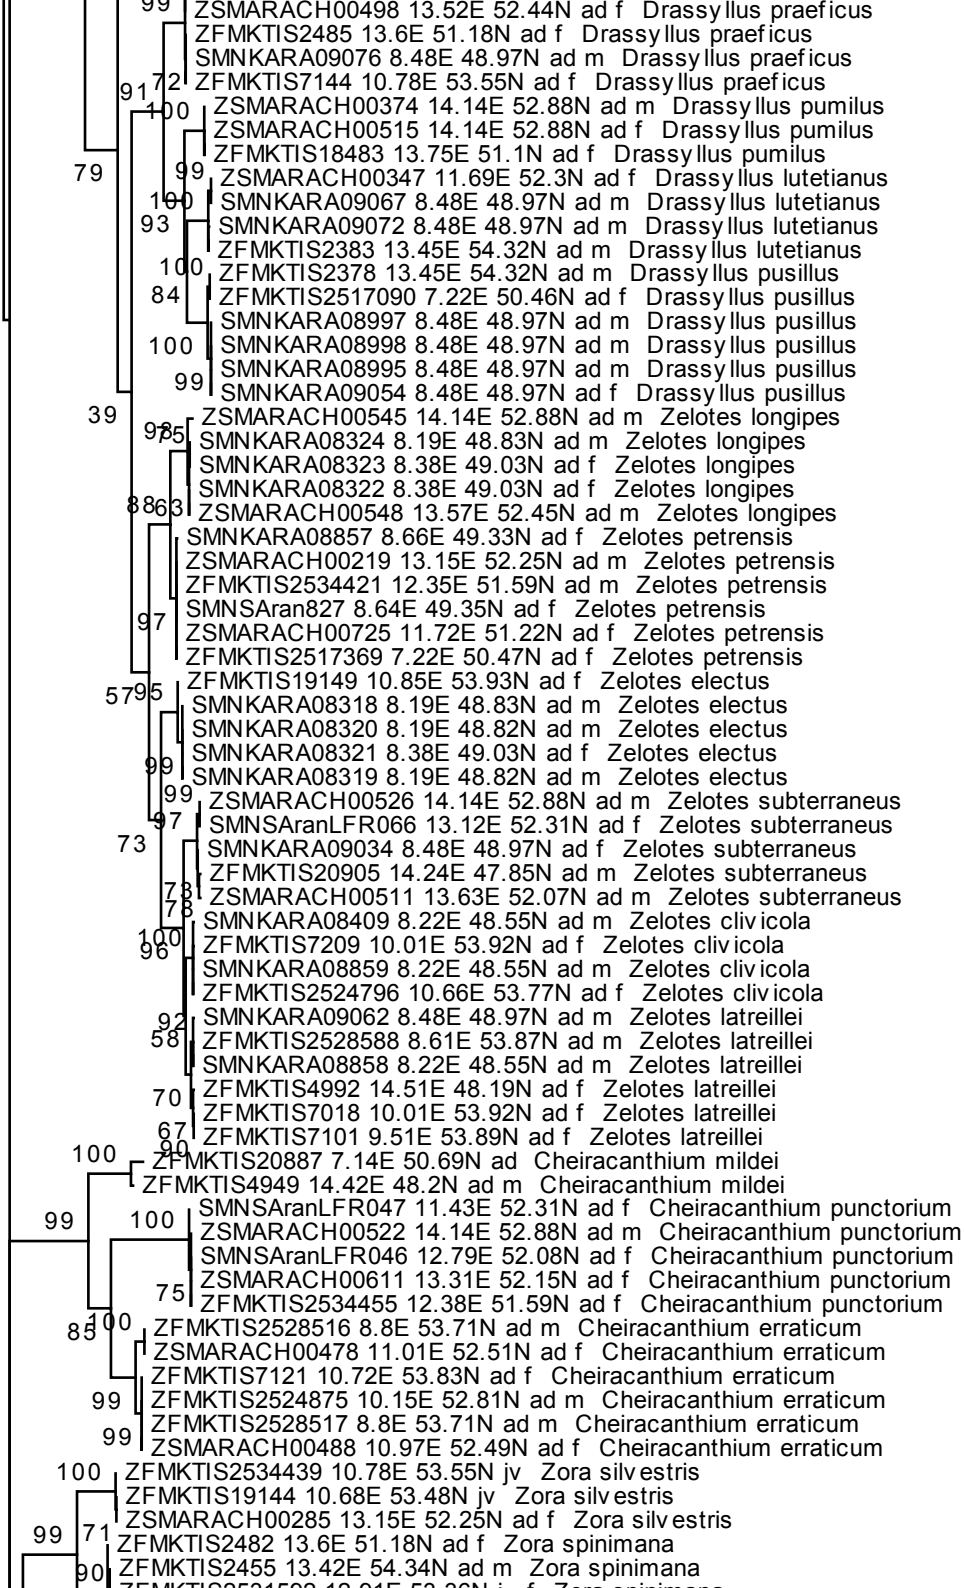

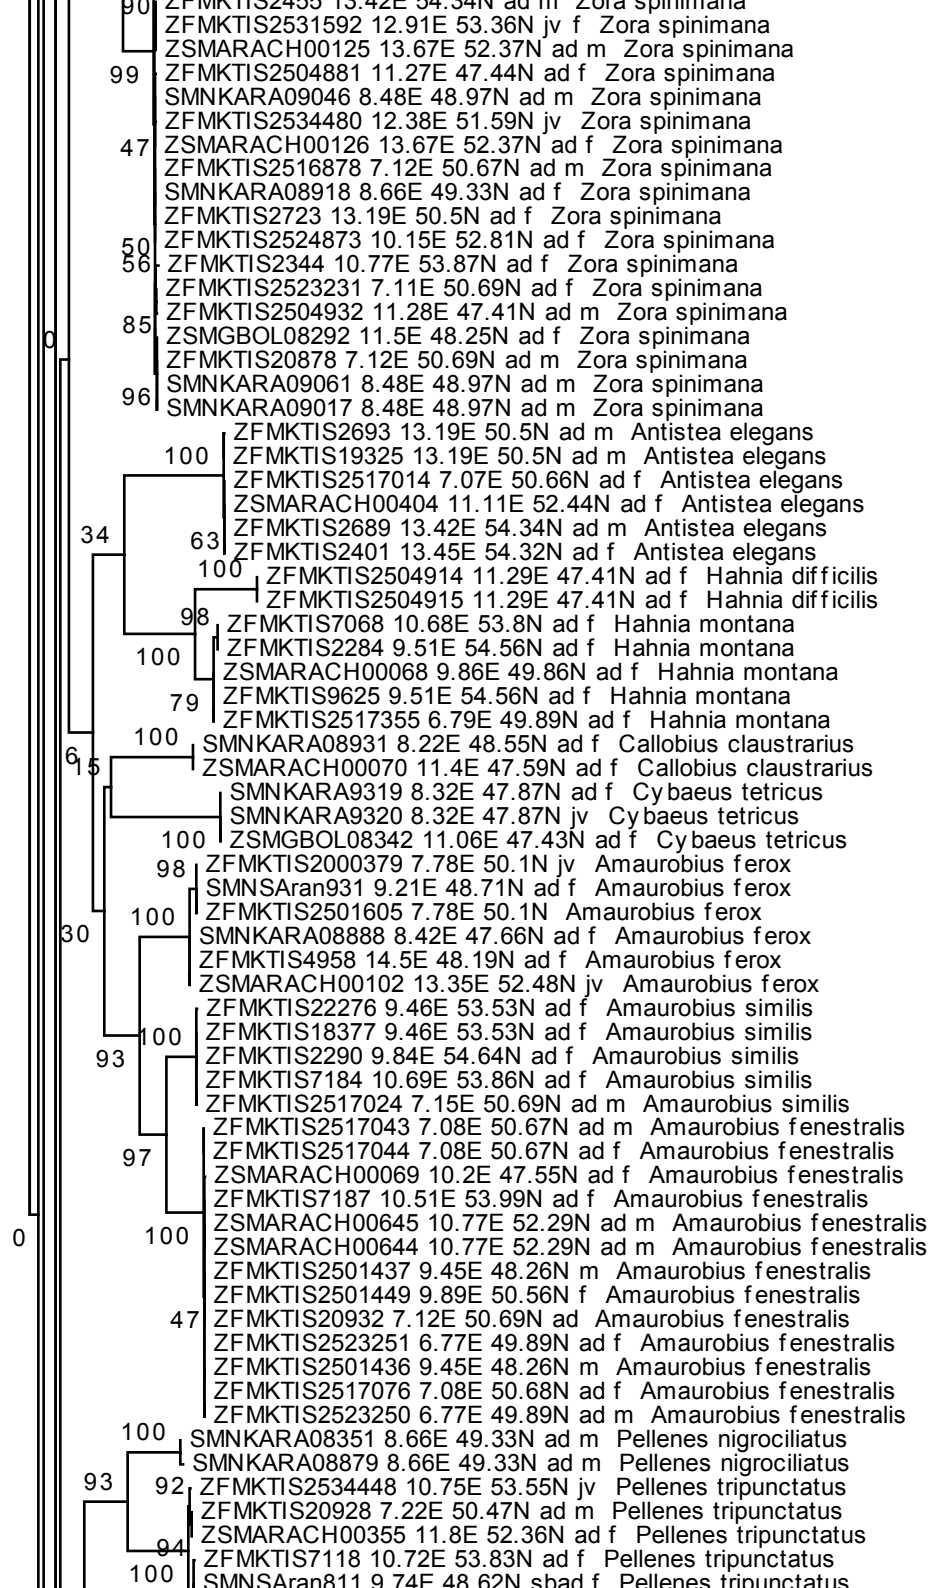

0.5



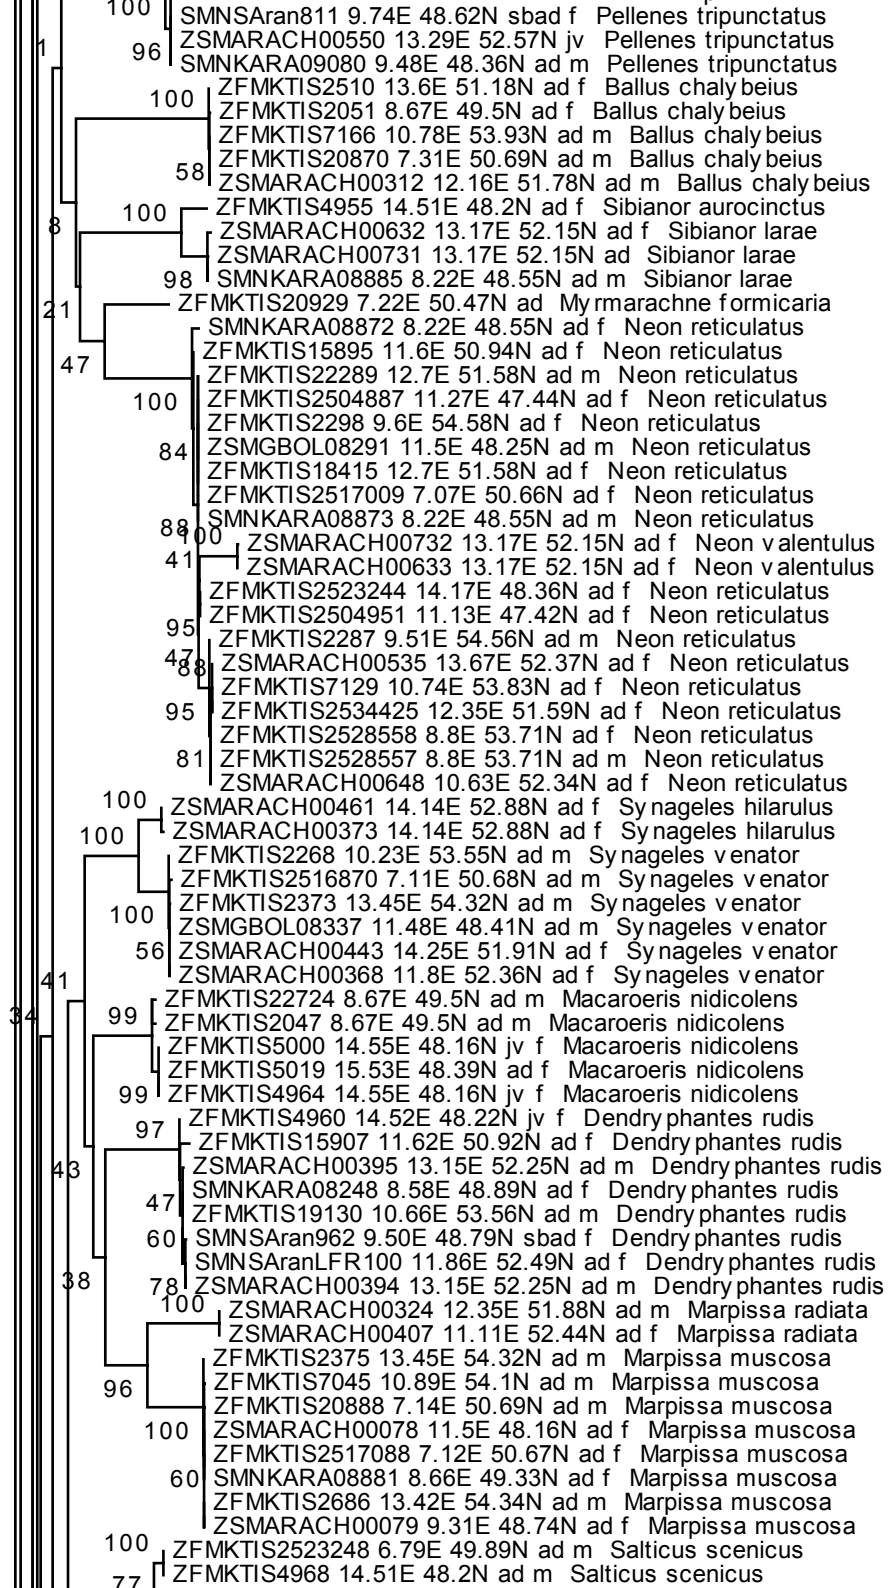

0.5

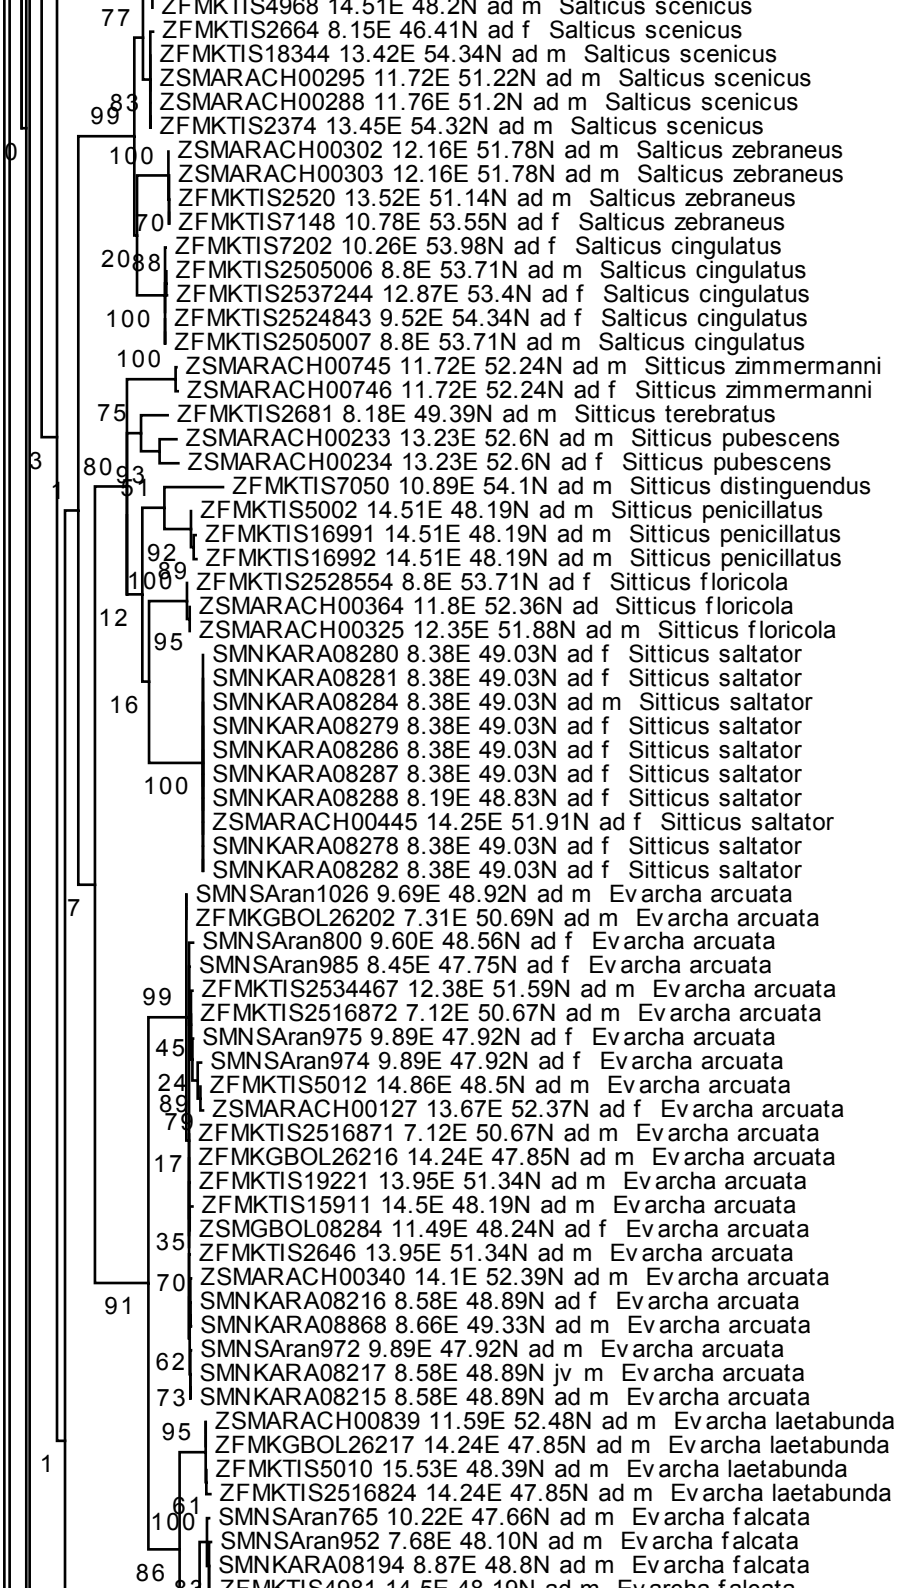

0.5

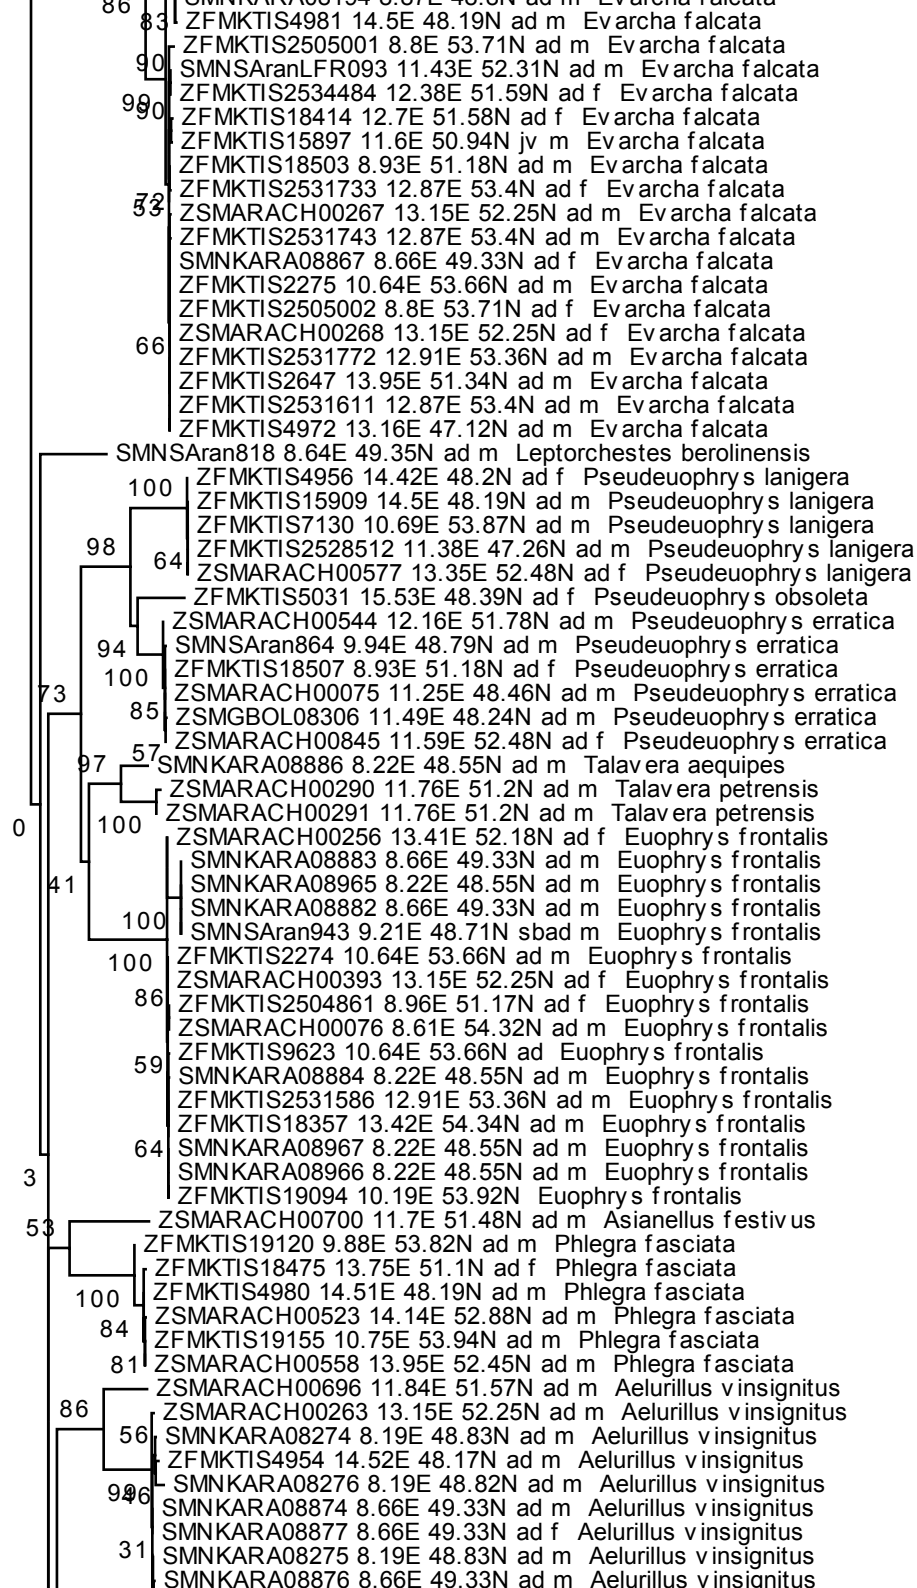

0.5

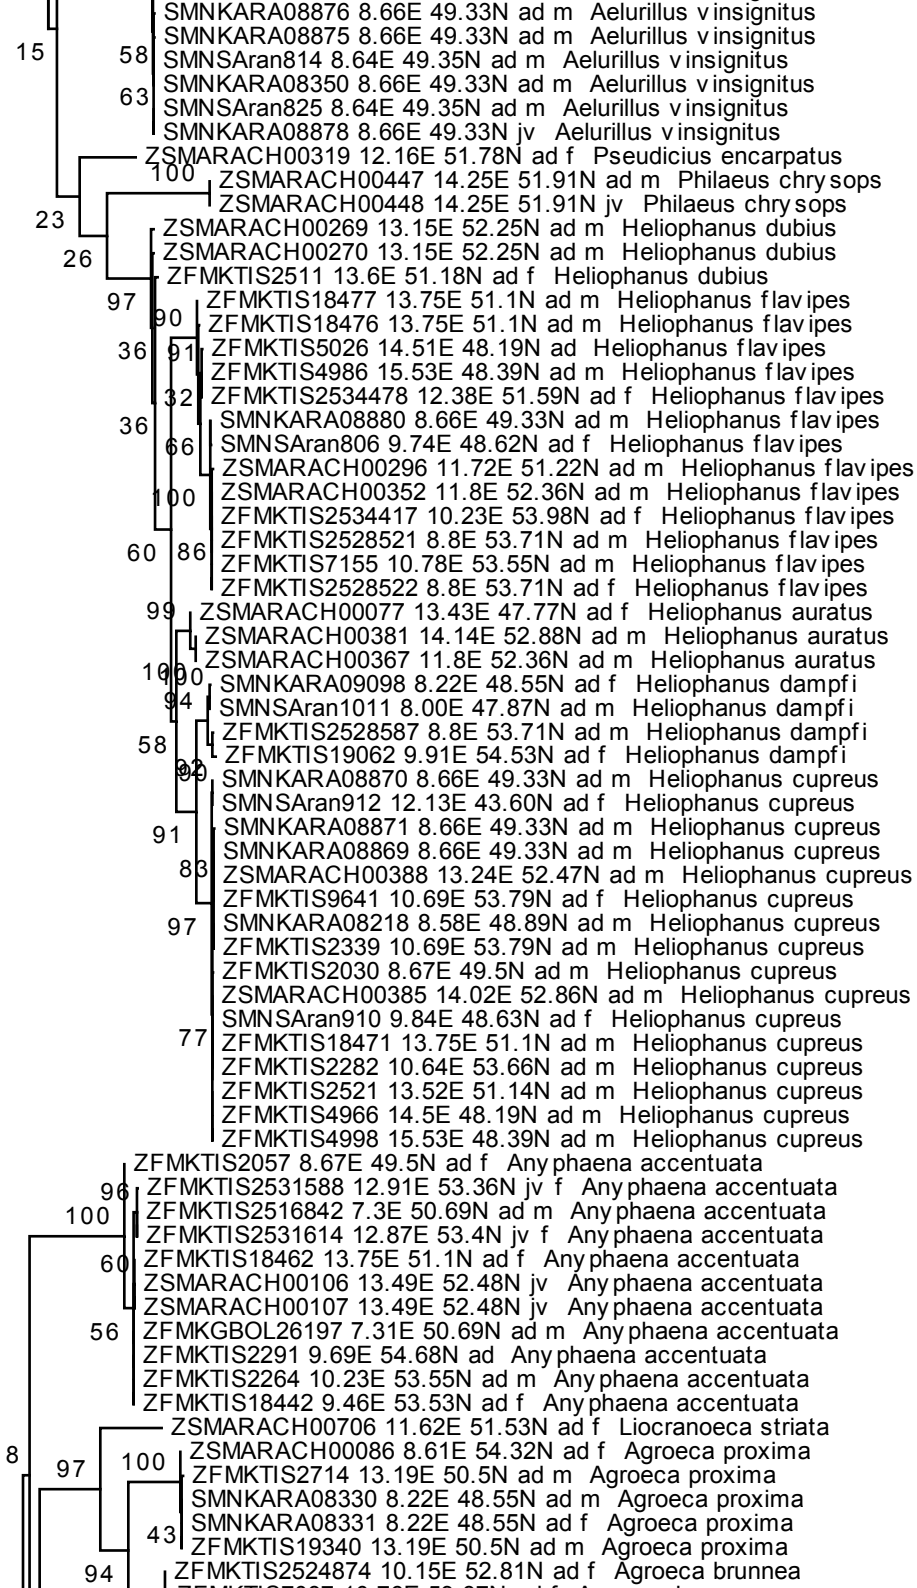

0.5



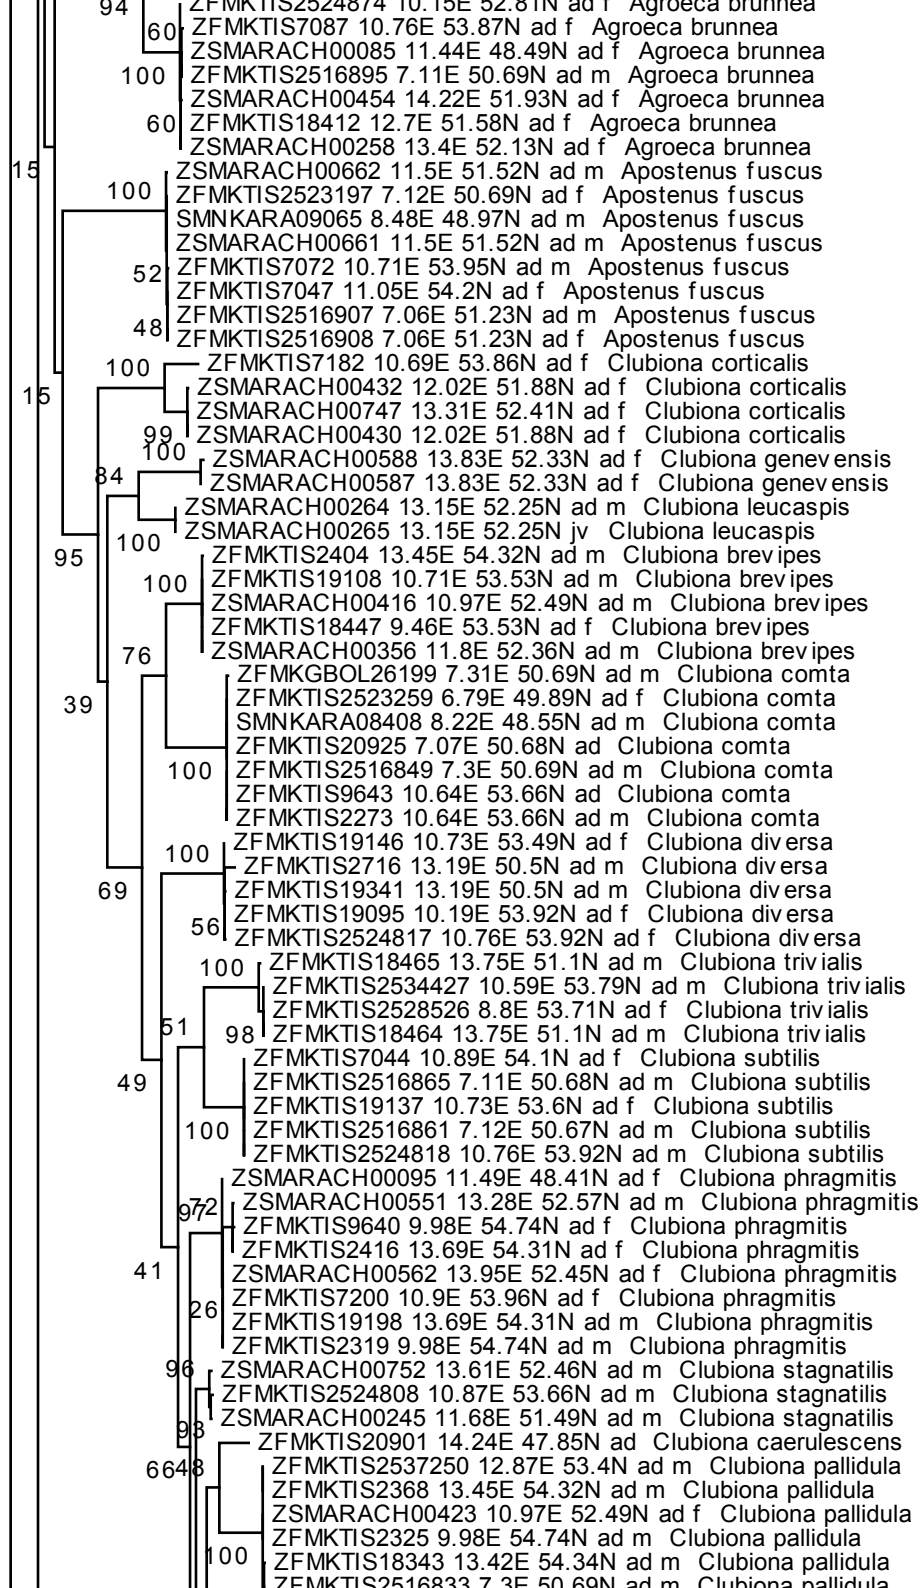

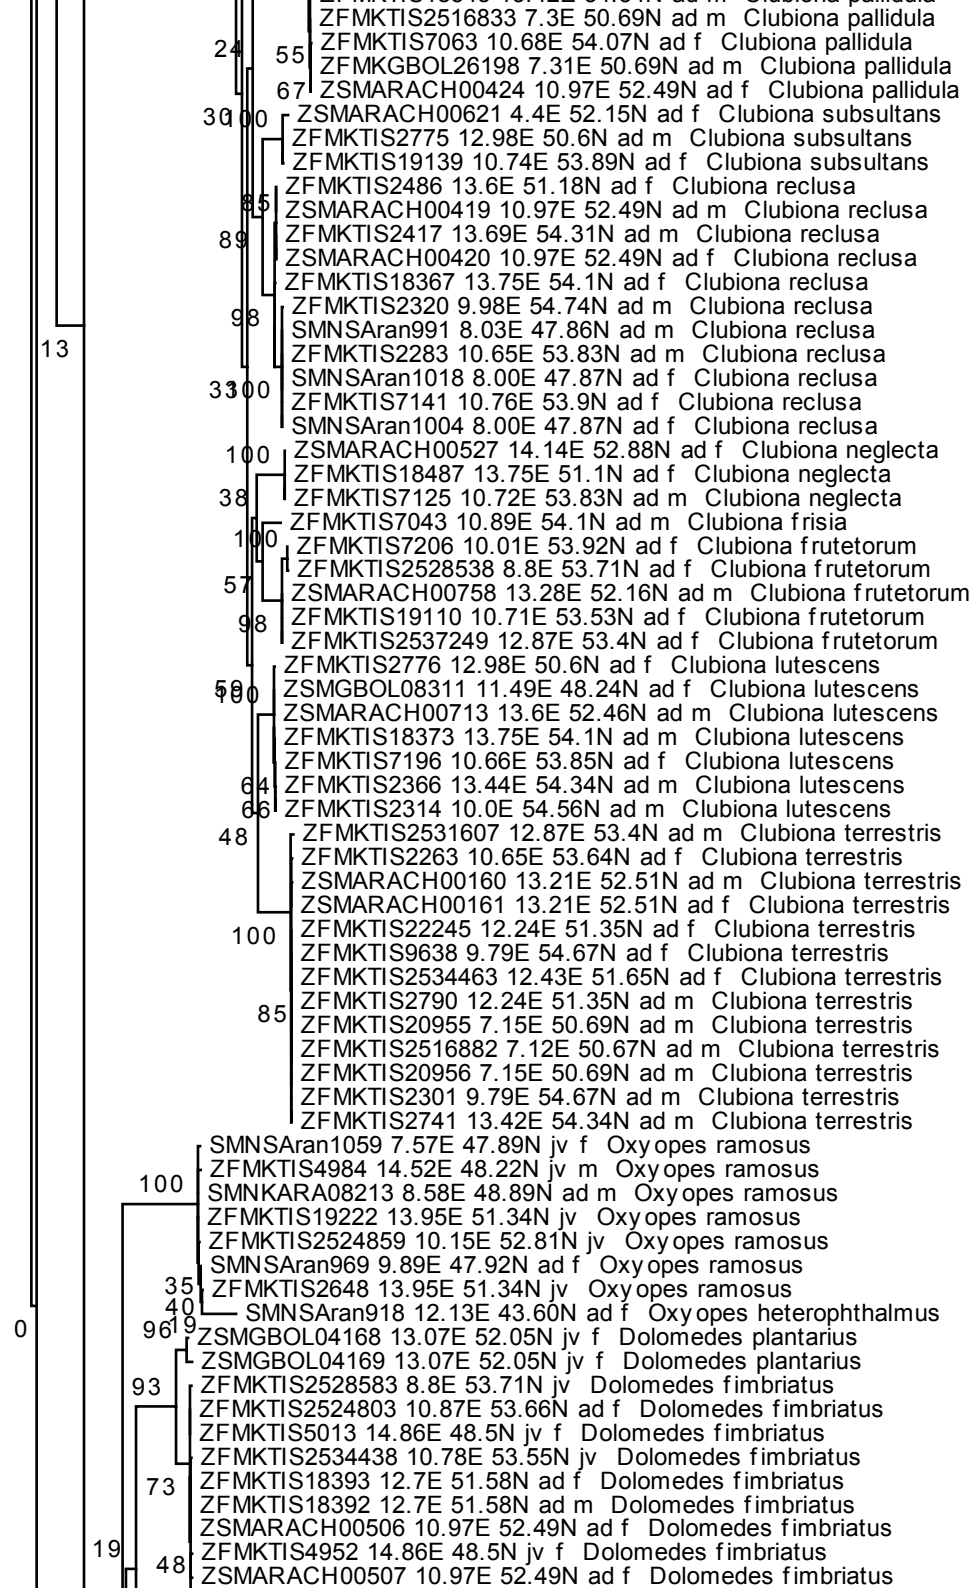

0.5

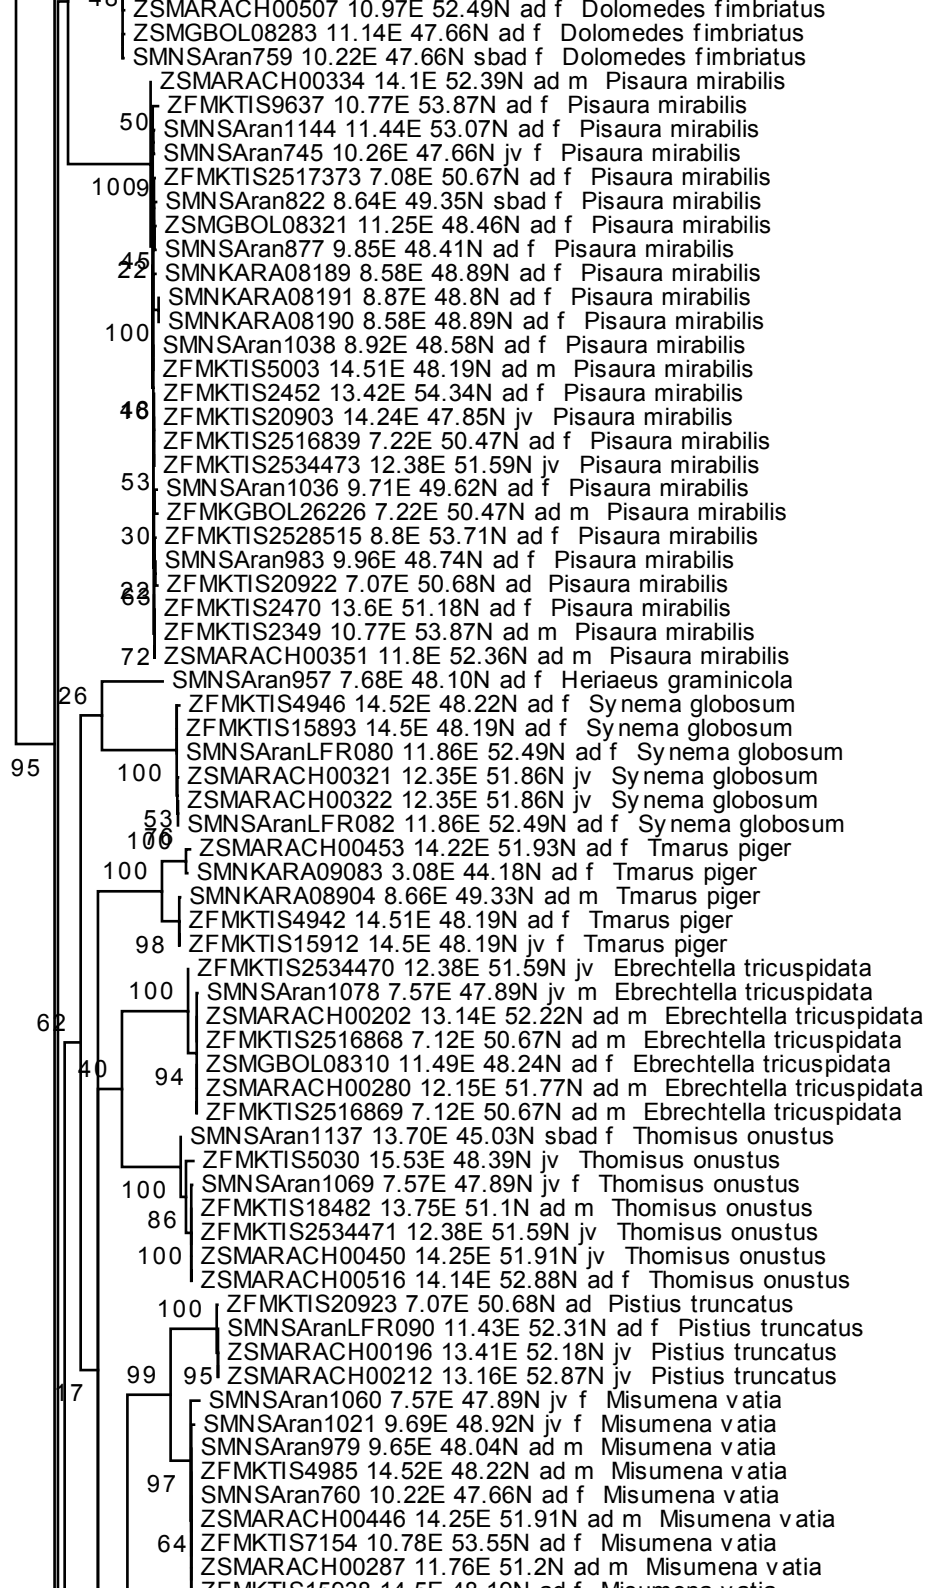

0.5

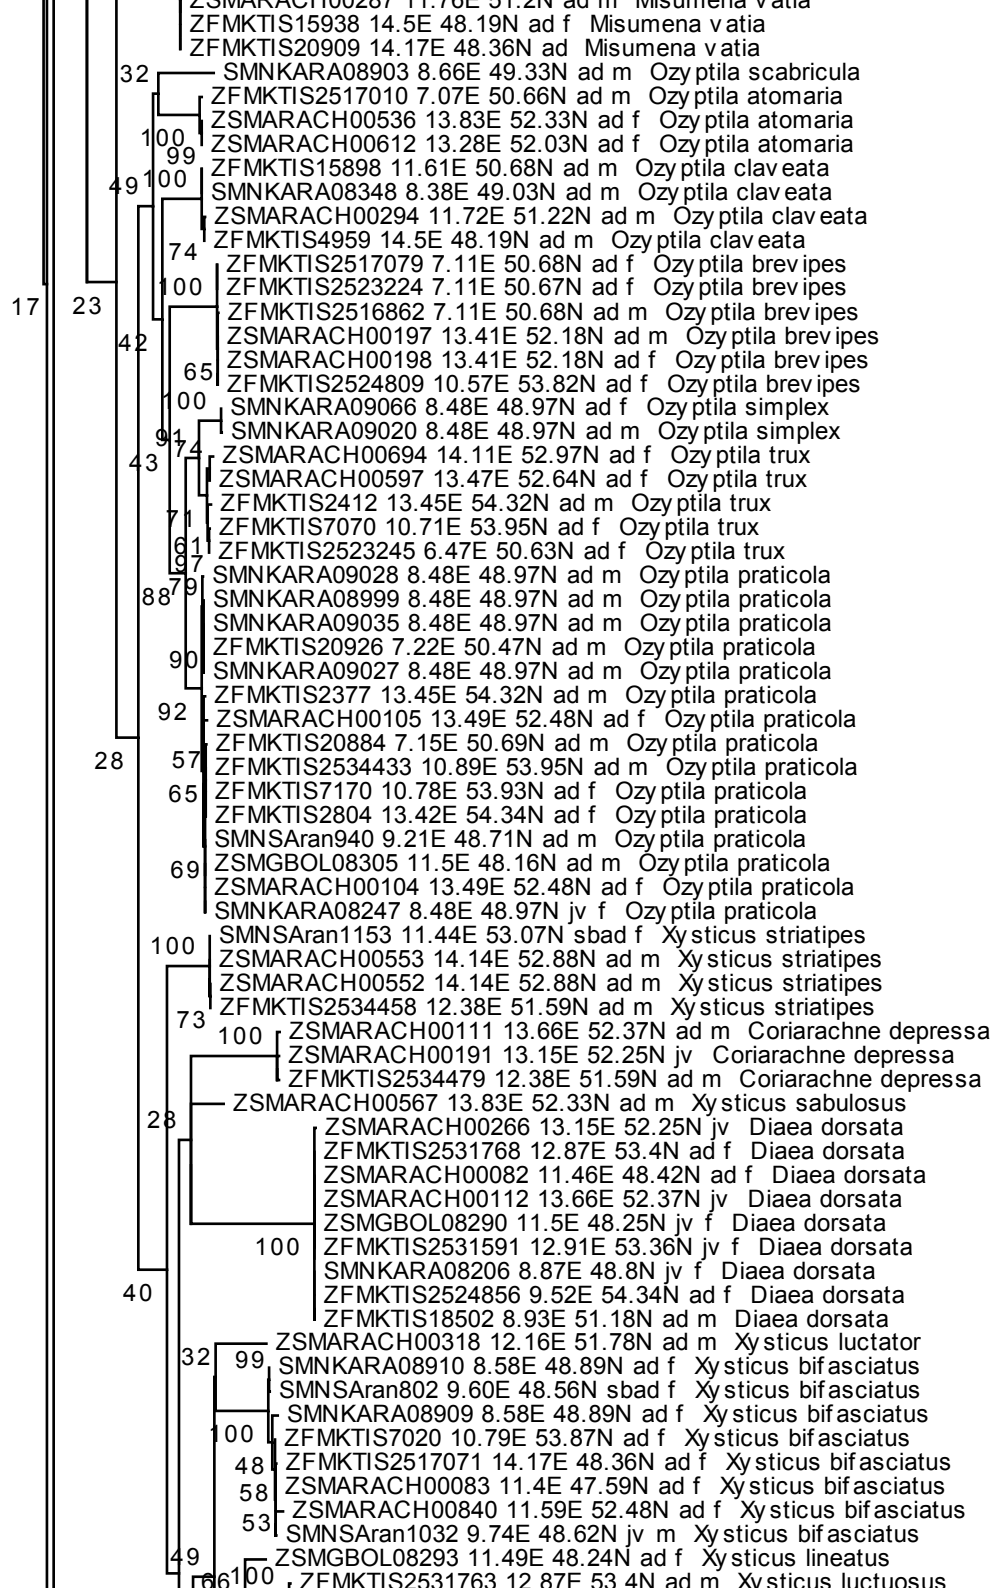

0.5



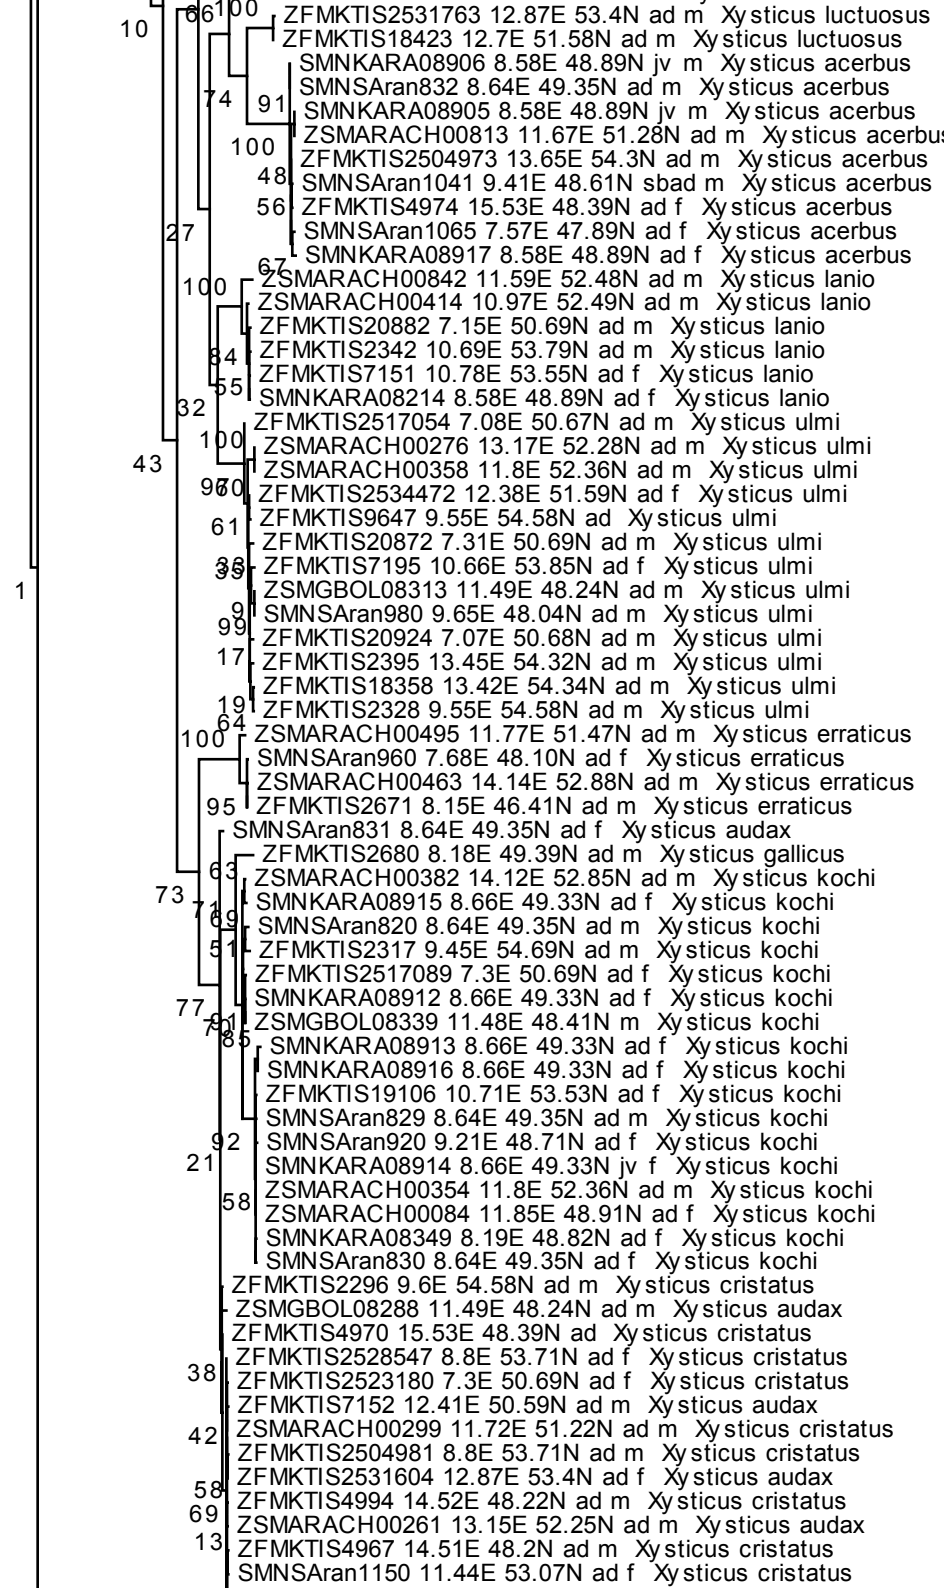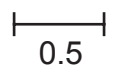

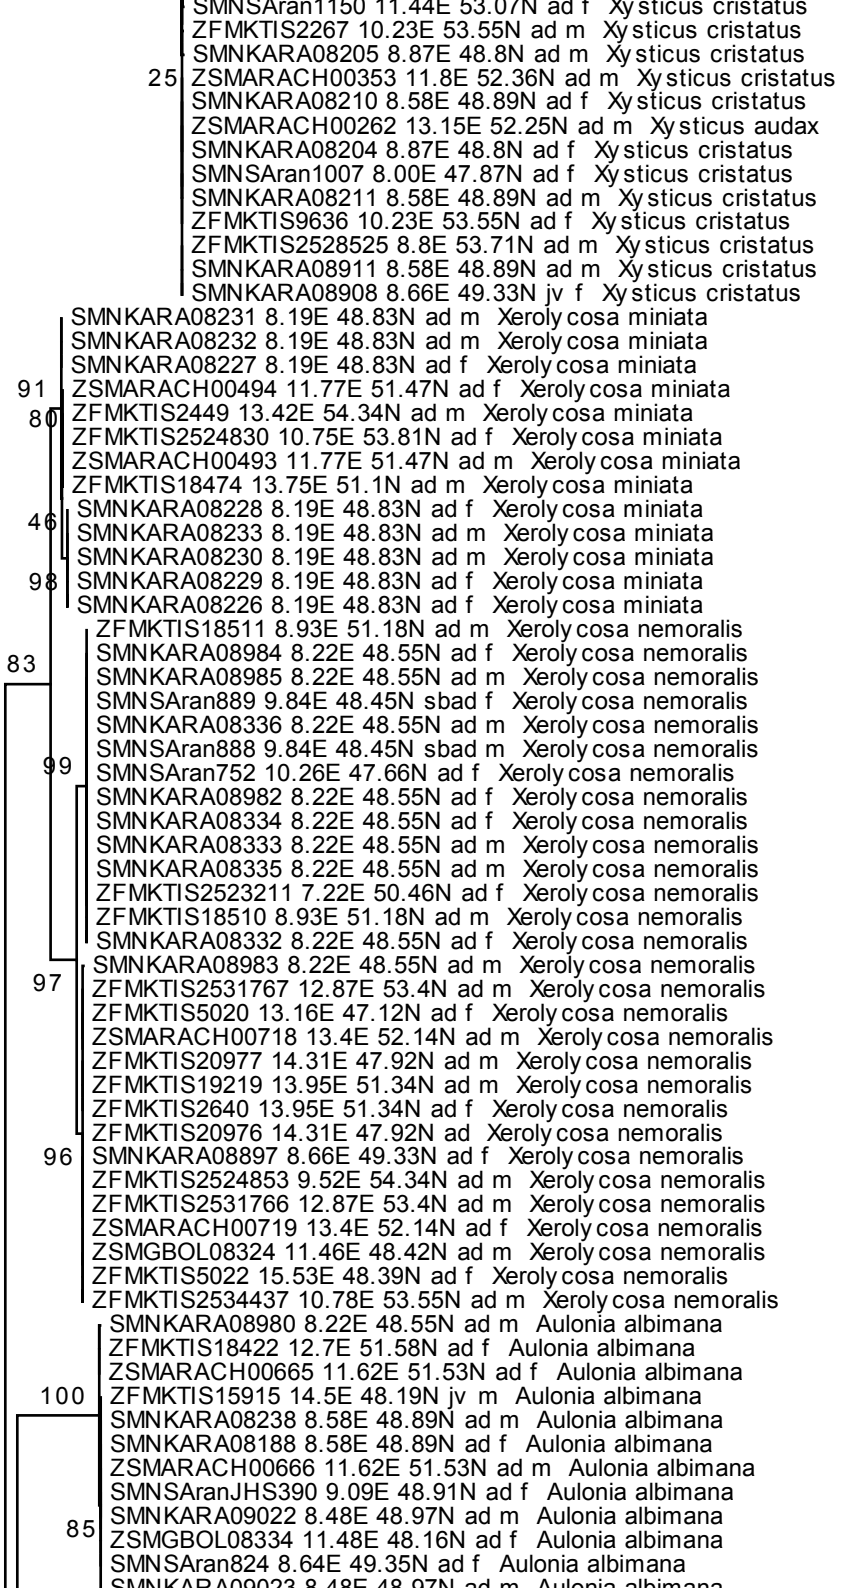

0.5

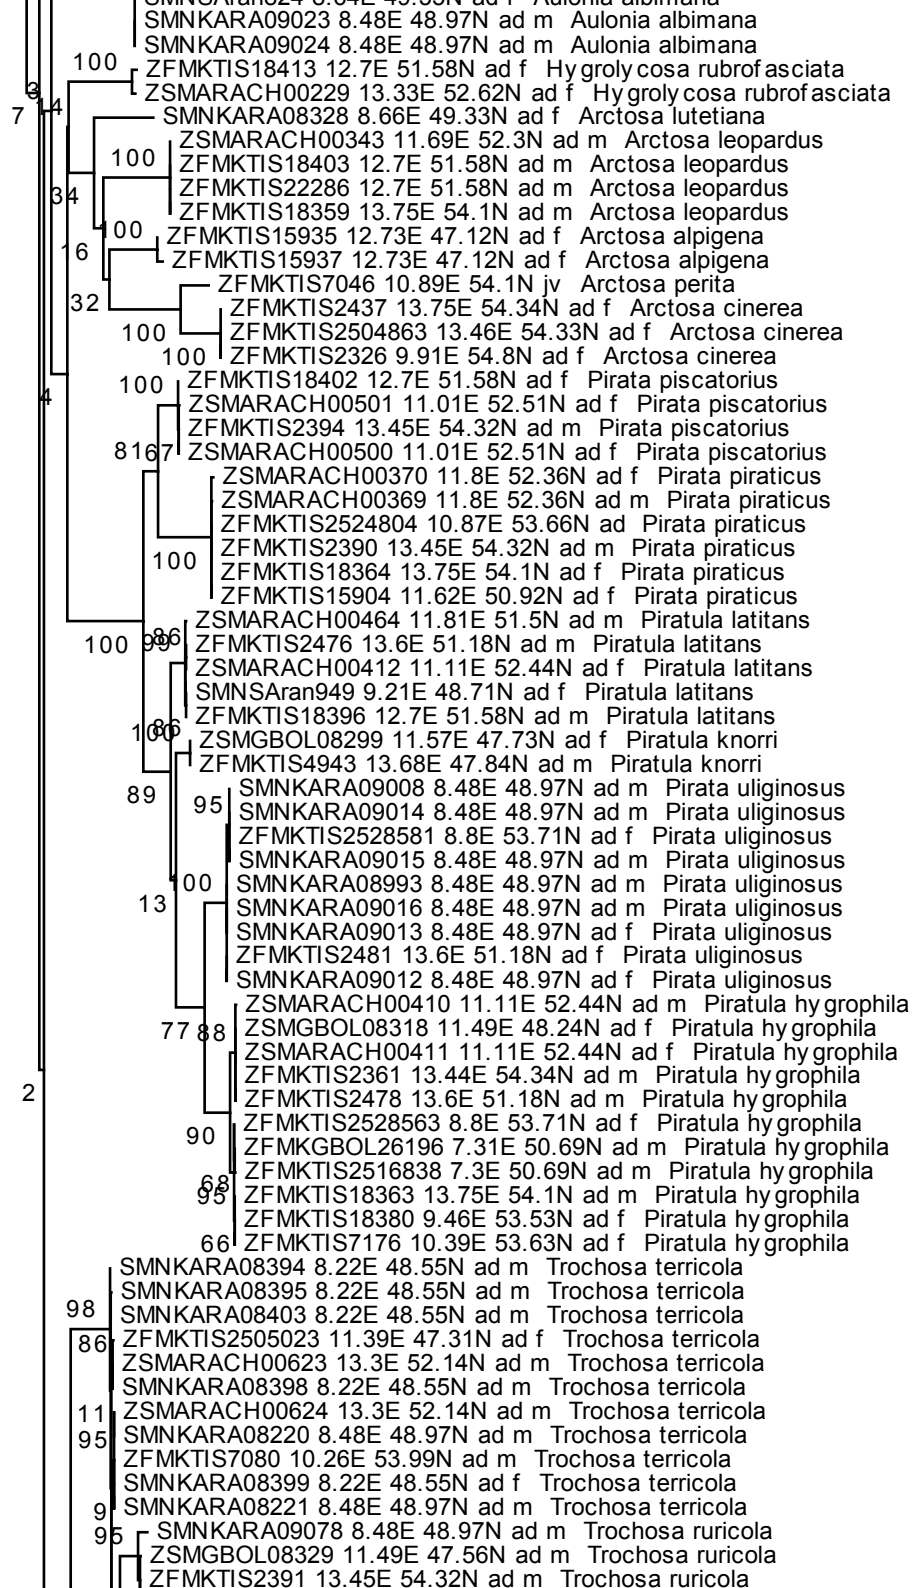

0.5

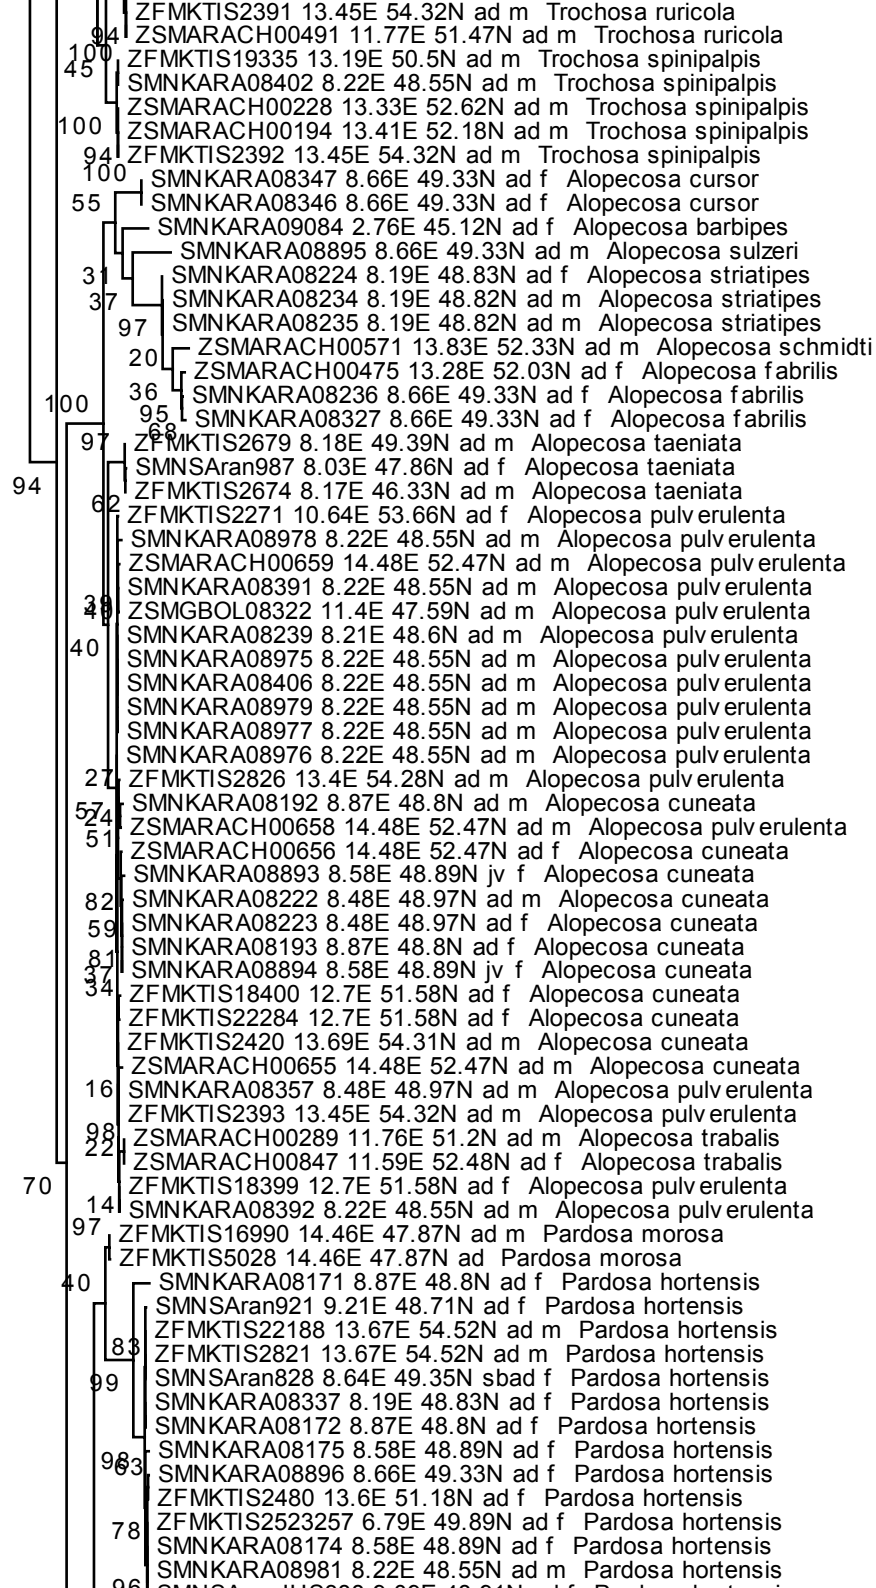

0.5



96 SMNKARA06961 8.22E 48.55N ad m *Pardosa hortensis*  
 SMNSAranJHS388 9.09E 48.91N ad f *Pardosa hortensis*  
 ZSMARACH00671 11.7E 51.48N ad m *Pardosa hortensis*  
 ZSMARACH00670 11.7E 51.48N ad m *Pardosa hortensis*  
 ZFMKTIS18486 13.75E 51.1N ad f *Pardosa nigriceps*  
 78 ZSMGBOL08279 13.5E 48.94N ad f *Acantholycosa lignaria*  
 ZFMKTIS15925 12.73E 47.09N ad f *Pardosa giebeli*  
 ZFMKTIS19224 7.79E 45.98N ad m *Pardosa nigra*  
 70 ZFMKTIS2650 7.79E 45.98N ad m *Pardosa nigra*  
 1099 SMNSAran901 9.88E 48.44N sbad f *Pardosa bifasciata*  
 100 SMNKARA09086 9.55E 48.36N ad m *Pardosa bifasciata*  
 17 SMNKARA09087 9.55E 48.36N ad m *Pardosa bifasciata*  
 SMNKARA09085 9.55E 48.36N ad m *Pardosa bifasciata*  
 93 SMNSAran897 9.88E 48.44N sbad m *Pardosa bifasciata*  
 SMNSAran875 9.85E 48.41N ad m *Pardosa riparia*  
 94 ZFMKTIS15922 12.82E 47.14N ad f *Pardosa riparia*  
 ZFMKTIS2677 8.18E 49.39N ad m *Pardosa riparia*  
 ZFMKTIS2477 13.6E 51.18N ad f *Pardosa prativaga*  
 ZFMKTIS18362 13.75E 54.1N ad m *Pardosa prativaga*  
 32 ZFMKTIS2524827 10.75E 53.81N ad f *Pardosa prativaga*  
 ZSMARACH00349 11.69E 52.3N ad f *Pardosa prativaga*  
 SMNKARA09007 8.48E 48.97N ad m *Pardosa prativaga*  
 SMNKARA08177 8.58E 48.89N ad f *Pardosa prativaga*  
 54 SMNKARA09051 8.48E 48.97N ad m *Pardosa prativaga*  
 ZFMKTIS19066 9.86E 54.45N ad f *Pardosa prativaga*  
 ZFMKTIS2355 13.45E 54.34N ad m *Pardosa prativaga*  
 SMNKARA09070 8.48E 48.97N ad f *Pardosa prativaga*  
 870 SMNKARA09060 8.48E 48.97N ad m *Pardosa prativaga*  
 ZSMARACH00348 11.69E 52.3N ad f *Pardosa prativaga*  
 86 ZFMKTIS18397 12.7E 51.58N ad m *Pardosa prativaga*  
 ZFMKTIS2524807 10.87E 53.66N ad f *Pardosa prativaga*  
 ZFMKTIS2505011 8.8E 53.71N ad f *Pardosa pullata*  
 ZFMKTIS2517366 6.77E 49.89N ad f *Pardosa pullata*  
 SMNKARA08170 8.87E 48.8N ad f *Pardosa pullata*  
 ZFMKTIS2528501 11.38E 47.29N ad f *Pardosa pullata*  
 45 SMNKARA08393 8.22E 48.55N ad m *Pardosa pullata*  
 SMNKARA08186 8.58E 48.89N ad f *Pardosa pullata*  
 SMNKARA08185 8.58E 48.89N ad f *Pardosa pullata*  
 SMNKARA08183 8.58E 48.89N ad f *Pardosa pullata*  
 SMNSAran1089 9.95E 48.73N ad f *Pardosa pullata*  
 12 SMNKARA08242 8.48E 48.97N ad m *Pardosa pullata*  
 SMNKARA08178 8.58E 48.89N ad f *Pardosa pullata*  
 SMNKARA08184 8.58E 48.89N ad f *Pardosa pullata*  
 SMNSAran1091 9.95E 48.73N ad f *Pardosa pullata*  
 89 ZFMKTIS7208 10.01E 53.92N ad f *Pardosa pullata*  
 SMNKARA08179 8.58E 48.89N ad f *Pardosa pullata*  
 ZFMKTIS2699 13.19E 50.5N ad f *Pardosa pullata*  
 66 SMNSAran1085 9.95E 48.73N ad f *Pardosa pullata*  
 SMNKARA08176 8.58E 48.89N ad f *Pardosa pullata*  
 SMNKARA08182 8.58E 48.89N ad f *Pardosa pullata*  
 33 ZFMKTIS19330 13.19E 50.5N ad f *Pardosa pullata*  
 6 ZFMKTIS2825 13.4E 54.28N ad m *Pardosa pullata*  
 ZFMKTIS2523256 6.79E 49.89N ad f *Pardosa pullata*  
 ZFMKTIS18326 13.21E 54.47N ad f *Pardosa pullata*  
 SMNKARA08169 8.87E 48.8N ad m *Pardosa pullata*  
 100 ZSMARACH00499 11.01E 52.51N ad f *Pardosa paludicola*  
 ZSMARACH00657 14.48E 52.47N ad m *Pardosa paludicola*  
 100 ZFMKTIS4962 14.46E 47.87N ad f *Pardosa wagleri*  
 ZSMGBOL08327 11.49E 47.56N ad f *Pardosa wagleri*  
 100 ZFMKTIS4944 12.14E 47.2N ad f *Pardosa oreophila*  
 ZFMKTIS2651 8.53E 46.56N ad m *Pardosa oreophila*  
 ZFMKTIS2656 8.45E 46.47N ad m *Pardosa oreophila*  
 ZFMKTIS19223 7.61E 46.08N ad m *Pardosa blanda*  
 ZFMKTIS2649 7.61E 46.08N ad m *Pardosa blanda*  
 140 ZFMKTIS2654 8.05E 46.25N ad f *Pardosa mixta*  
 35 ZFMKTIS2682 8.18E 49.39N ad f *Pardosa mixta*  
 ZSMARACH00835 11.59E 52.48N ad m *Pardosa monticola*

0.5

39 ZSMARACH00835 11.59E 52.48N ad m *Pardosa monticola*  
 75 ZFMKTIS19079 10.02E 54.47N ad m *Pardosa monticola*  
 92 ZFMKTIS2524839 9.52E 54.34N ad f *Pardosa monticola*  
 ZFMKTIS2534450 10.74E 53.48N ad f *Pardosa monticola*  
 ZFMKTIS2534451 10.74E 53.48N ad f *Pardosa monticola*  
 76 ZSMGBOL08323 11.57E 47.73N ad m *Pardosa torrentum*  
 ZFMKTIS19077 10.02E 54.47N ad m *Pardosa agrestis*  
 563 ZFMKTIS18353 13.38E 54.68N ad m *Pardosa agrestis*  
 82 ZFMKTIS22270 13.38E 54.68N ad m *Pardosa agrestis*  
 68 ZFMKTIS2436 13.46E 54.32N ad m *Pardosa agrestis*  
 2 ZFMKTIS22258 13.21E 54.47N ad m *Pardosa agrestis*  
 ZFMKTIS18325 13.21E 54.47N ad m *Pardosa agrestis*  
 ZSMARACH00572 13.83E 52.33N ad f *Pardosa agrestis*  
 89 SMNKARA08225 8.19E 48.83N ad f *Pardosa agrestis*  
 SMNKARA08240 8.48E 48.97N ad m *Pardosa agrestis*  
 ZFMKTIS2479 13.6E 51.18N ad f *Pardosa palustris*  
 88 SMNKARA08147 8.87E 48.8N ad m *Pardosa palustris*  
 SMNKARA08152 8.87E 48.8N ad m *Pardosa palustris*  
 98 SMNKARA08187 8.58E 48.89N ad f *Pardosa palustris*  
 SMNKARA08142 8.87E 48.8N ad m *Pardosa palustris*  
 SMNKARA08151 8.87E 48.8N ad m *Pardosa palustris*  
 100 SMNKARA08153 8.87E 48.8N ad m *Pardosa palustris*  
 SMNKARA08140 8.87E 48.8N ad m *Pardosa palustris*  
 SMNKARA08138 8.87E 48.8N ad f *Pardosa palustris*  
 ZFMKTIS18355 13.45E 54.32N ad f *Pardosa palustris*  
 SMNKARA08148 8.87E 48.8N ad m *Pardosa palustris*  
 ZFMKTIS18398 12.7E 51.58N ad m *Pardosa palustris*  
 62 ZSMARACH00465 11.81E 51.5N ad m *Pardosa palustris*  
 5 SMNKARA08150 8.87E 48.8N ad m *Pardosa palustris*  
 SMNKARA08144 8.87E 48.8N ad m *Pardosa palustris*  
 ZFMKTIS22271 13.45E 54.32N ad m *Pardosa palustris*  
 SMNKARA08141 8.87E 48.8N ad m *Pardosa palustris*  
 SMNKARA08143 8.87E 48.8N ad m *Pardosa palustris*  
 ZSMARACH00717 13.28E 52.03N ad m *Pardosa palustris*  
 SMNKARA08145 8.87E 48.8N ad m *Pardosa palustris*  
 ZFMKTIS22185 13.4E 54.28N ad m *Pardosa amentata*  
 98 ZFMKTIS2824 13.4E 54.28N ad m *Pardosa amentata*  
 SMNSAran1094 9.95E 48.73N sbad f *Pardosa amentata*  
 ZFMKTIS2415 13.69E 54.31N ad m *Pardosa amentata*  
 64 ZFMKTIS7116 9.27E 54.24N ad f *Pardosa amentata*  
 97 ZFMKTIS15919 12.81E 47.14N ad m *Pardosa amentata*  
 ZFMKTIS2505034 11.38E 47.29N ad f *Pardosa amentata*  
 SMNSAran1088 9.95E 48.73N sbad f *Pardosa amentata*  
 SMNSAran1093 9.95E 48.73N sbad m *Pardosa amentata*  
 ZFMKTIS2524826 10.75E 53.81N ad f *Pardosa amentata*  
 39 ZSMARACH00421 10.97E 52.49N ad f *Pardosa amentata*  
 ZFMKTIS2639 13.95E 51.34N ad f *Pardosa amentata*  
 ZFMKTIS4979 13.68E 47.84N ad m *Pardosa amentata*  
 ZFMKTIS2475 13.6E 51.18N ad m *Pardosa amentata*  
 64 ZSMARACH00422 10.97E 52.49N ad f *Pardosa amentata*  
 43 SMNSAran799 9.60E 48.56N ad f *Pardosa amentata*  
 SMNSAran1008 8.00E 47.87N ad f *Pardosa amentata*  
 SMNSAran1090 9.95E 48.73N sbad m *Pardosa amentata*  
 SMNSAran999 8.00E 47.87N ad m *Pardosa amentata*  
 ZFMKTIS2653 8.43E 46.59N ad m *Pardosa amentata*  
 SMNSAran1001 8.00E 47.87N ad f *Pardosa amentata*  
 35 ZFMKTIS2504859 8.96E 51.17N ad m *Pardosa amentata*  
 SMNSAran994 8.00E 47.87N ad m *Pardosa amentata*  
 17 ZFMKTIS2504860 8.96E 51.17N ad f *Pardosa amentata*  
 SMNSAran1087 9.95E 48.73N sbad f *Pardosa amentata*  
 ZSMGBOL08312 11.48E 48.41N ad m *Pardosa amentata*  
 40 ZFMKTIS2505033 11.38E 47.29N ad m *Pardosa amentata*  
 ZFMKTIS19225 8.43E 46.59N ad m *Pardosa amentata*  
 SMNSAran1092 9.95E 48.73N sbad f *Pardosa amentata*  
 SMNKARA08241 8.22E 48.53N ad f *Pardosa amentata*  
 ZFMKTIS2523255 6.79E 49.89N ad f *Pardosa lugubris*

0.5

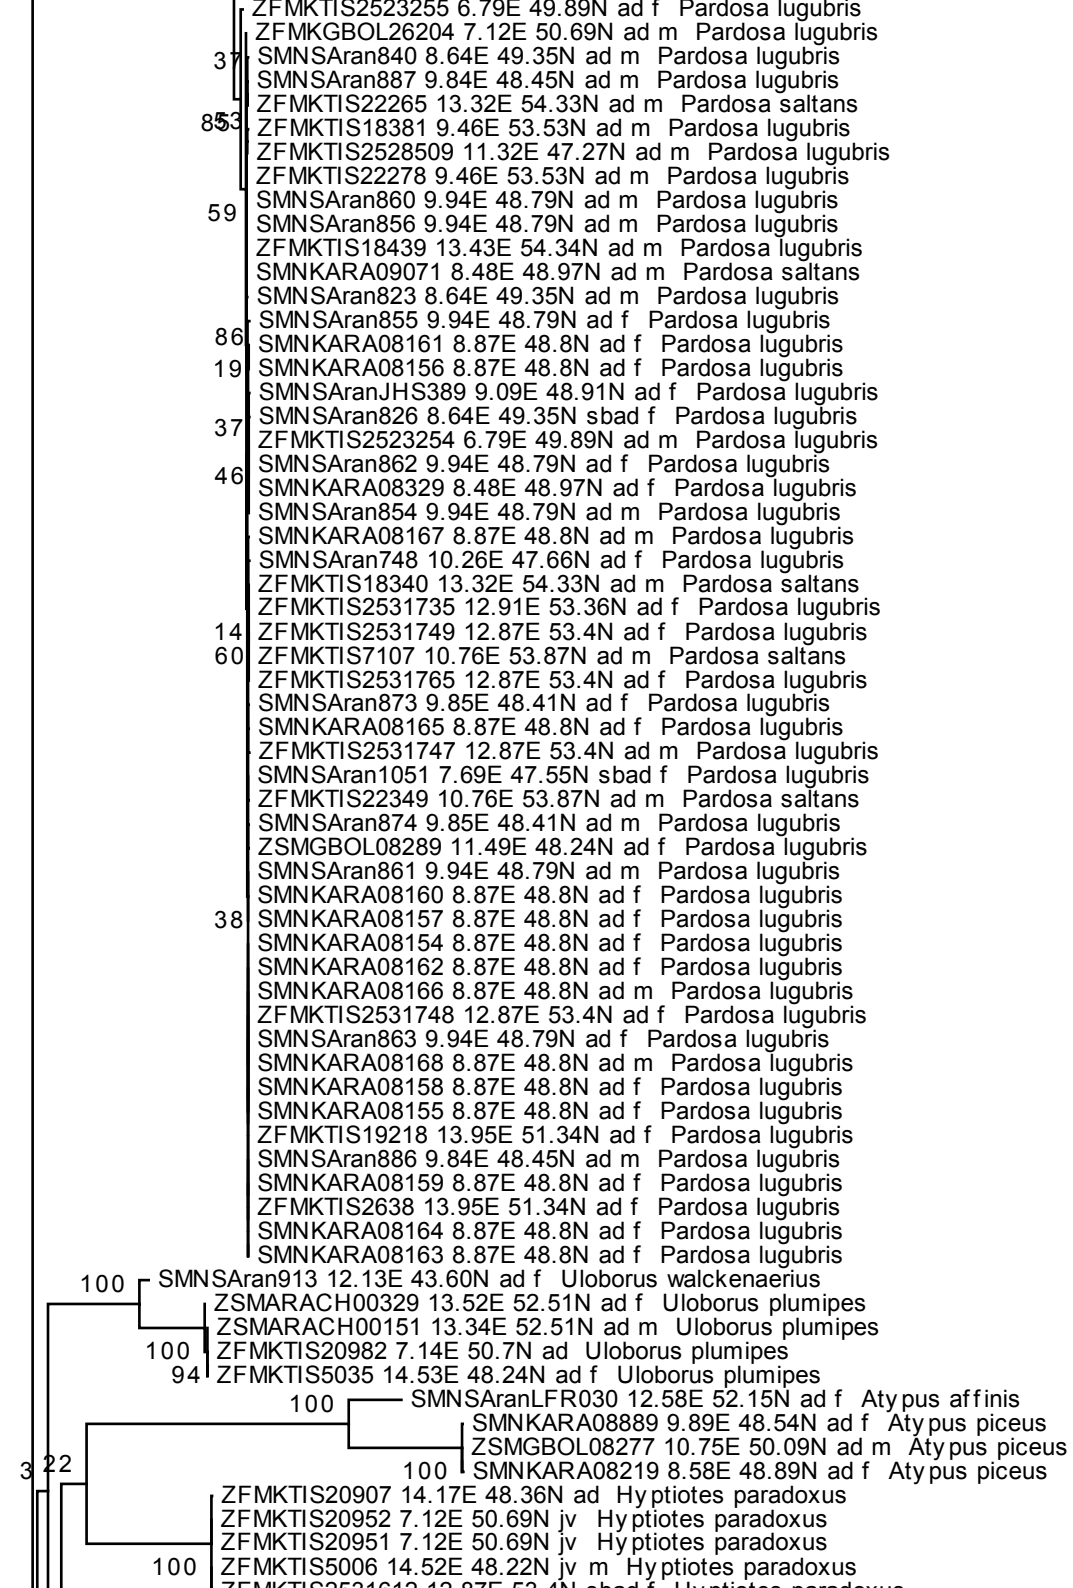

0.5

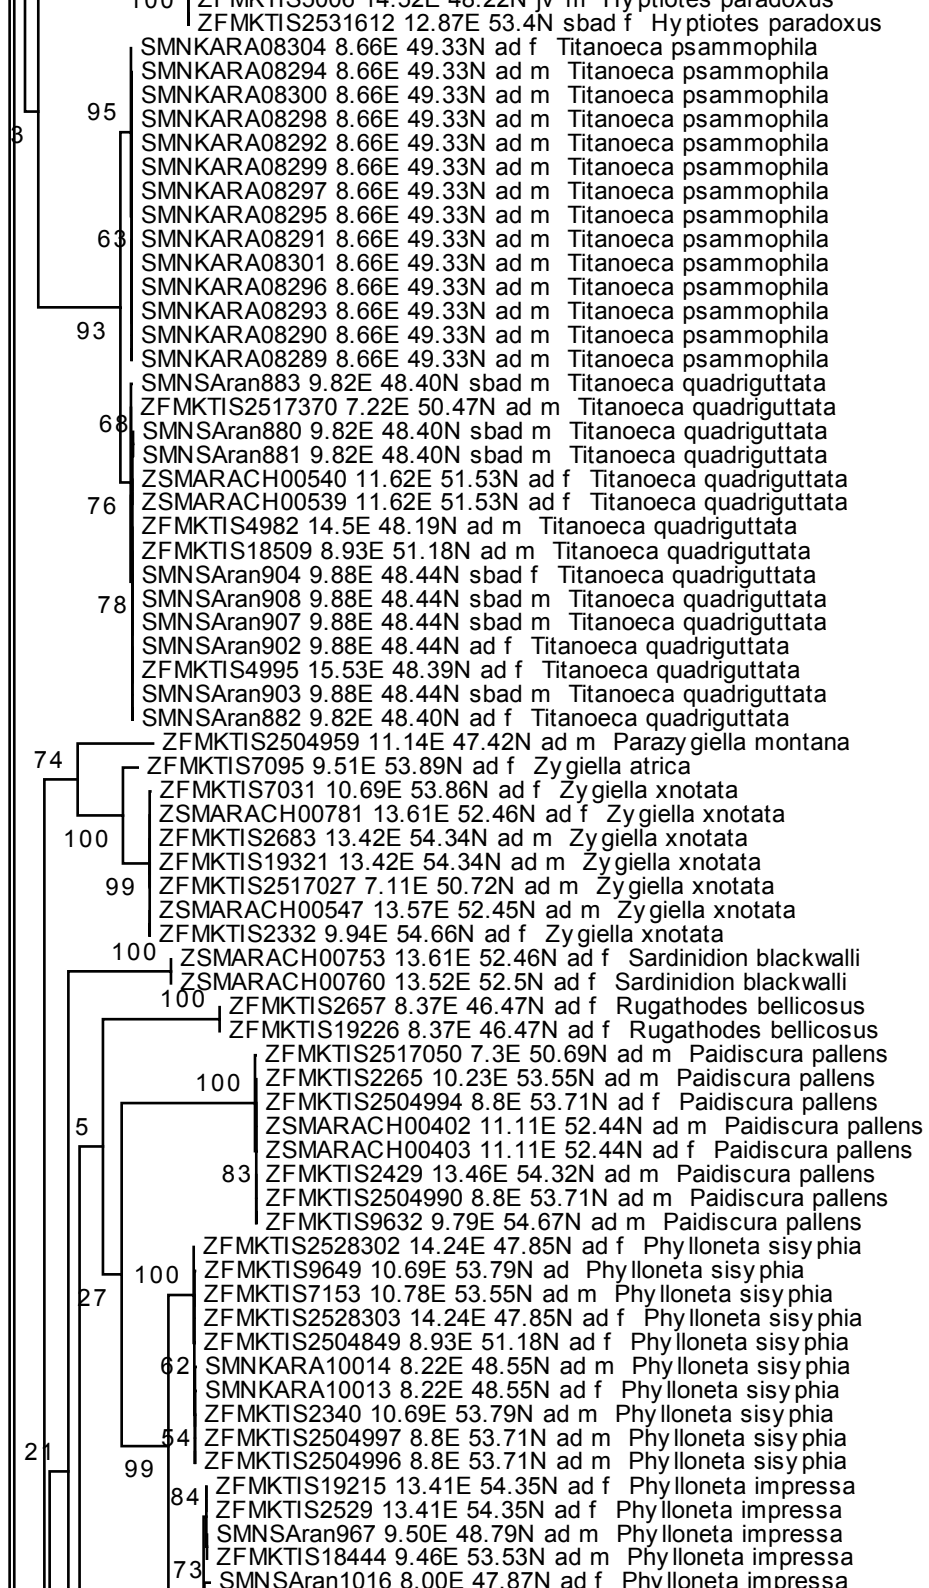

0.5



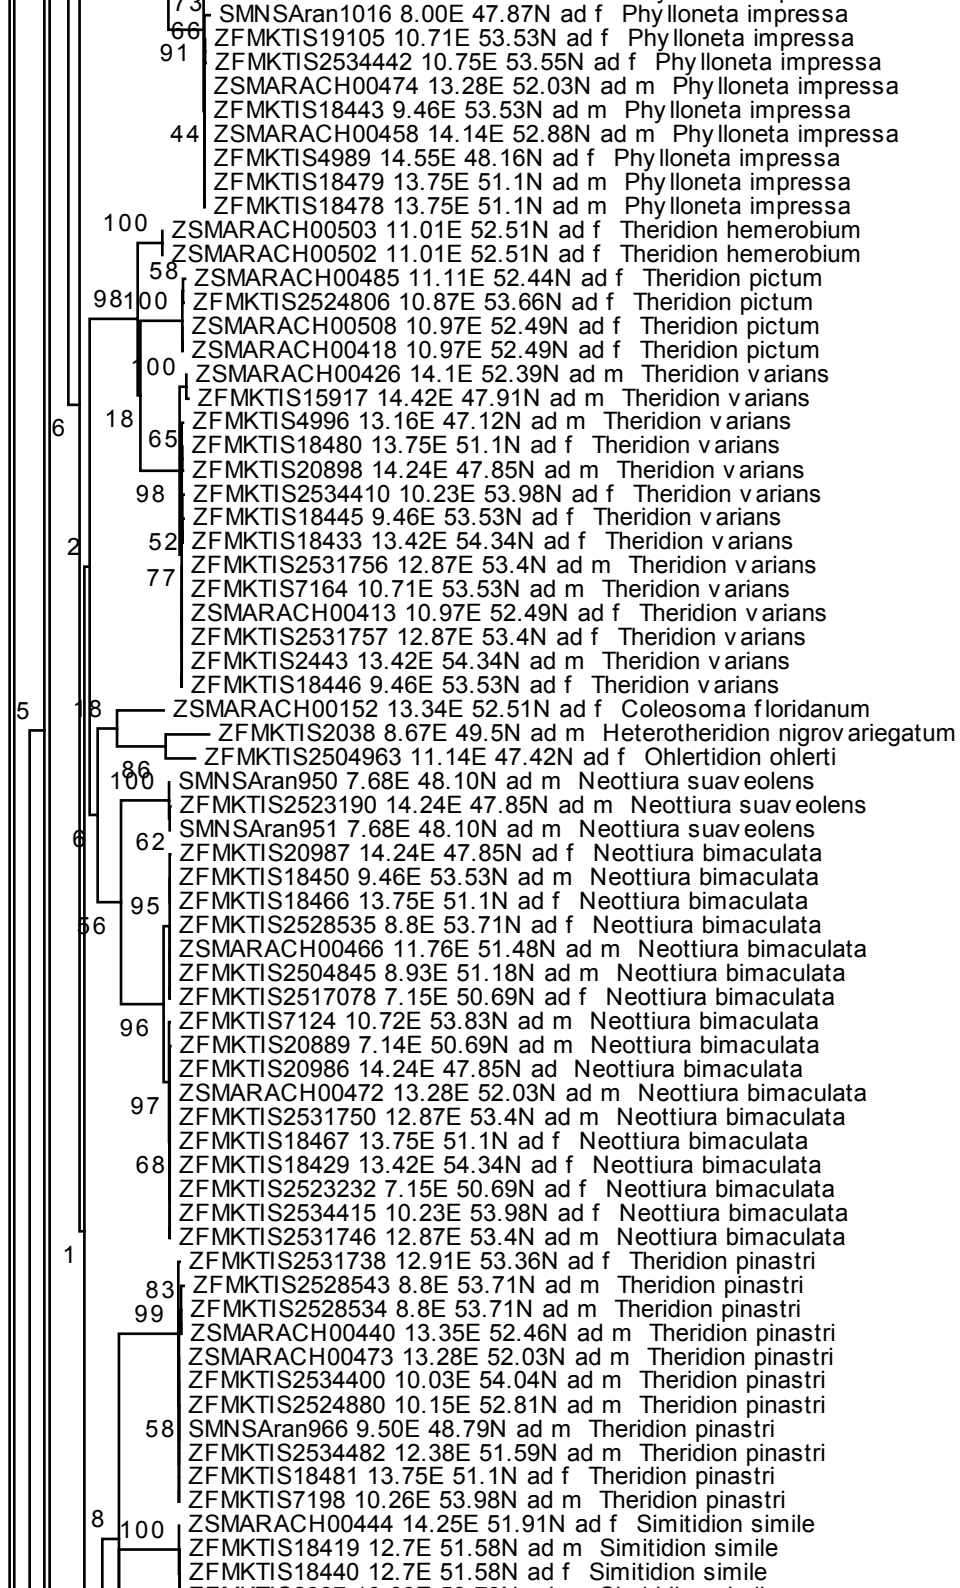

0.5

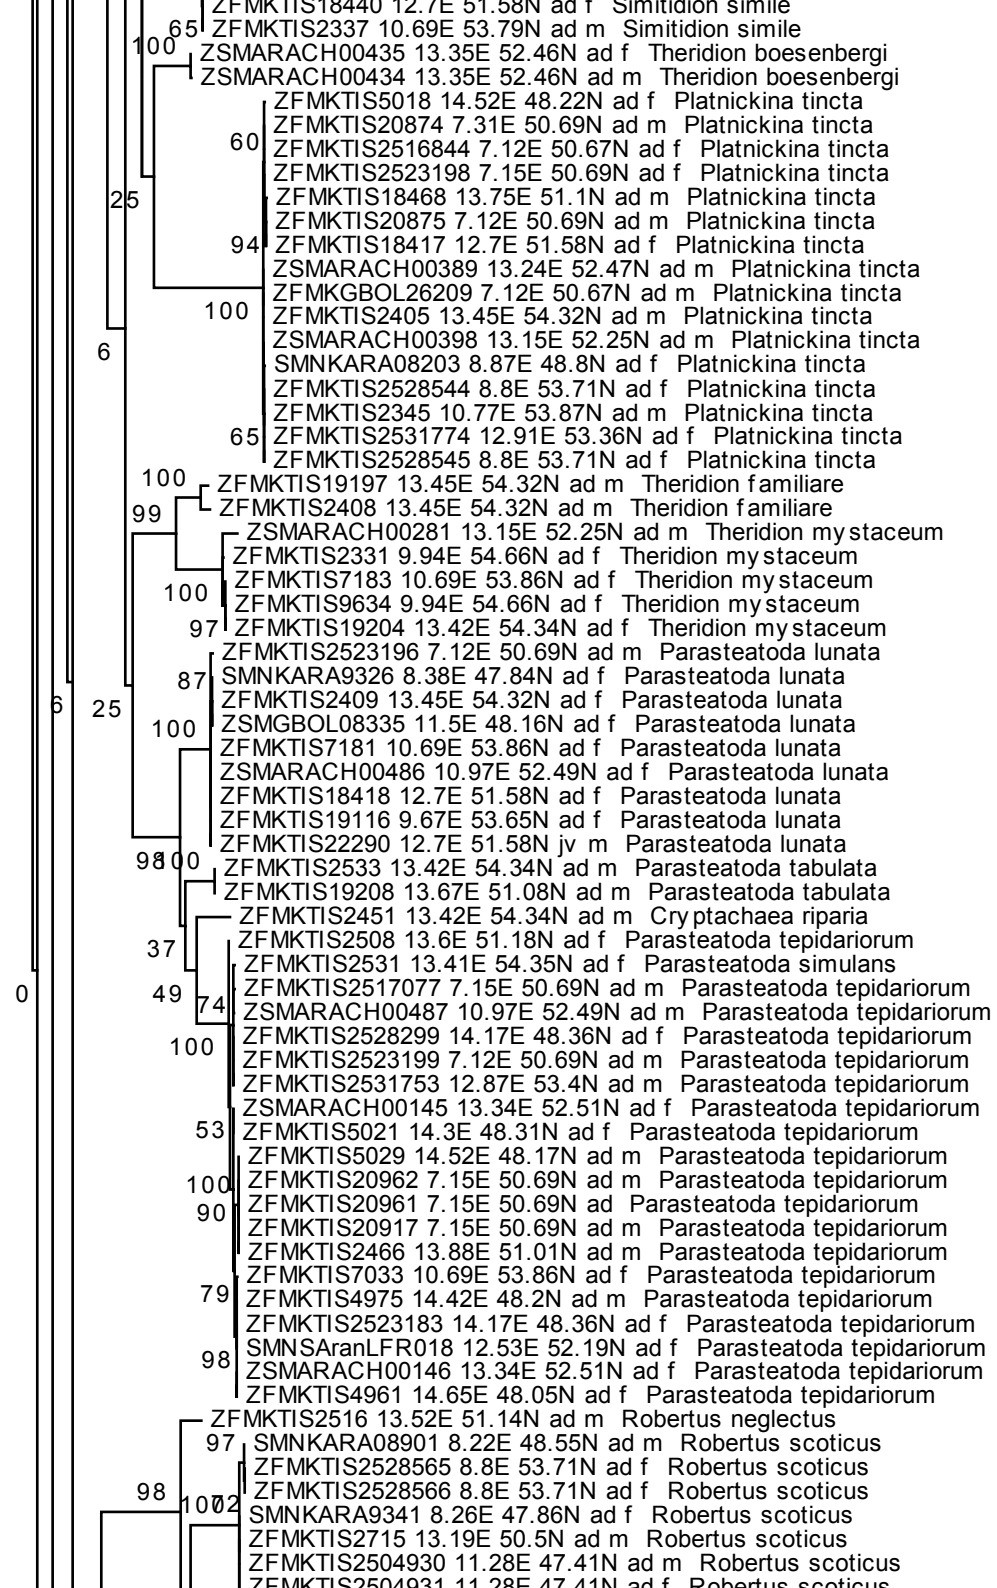

0.5

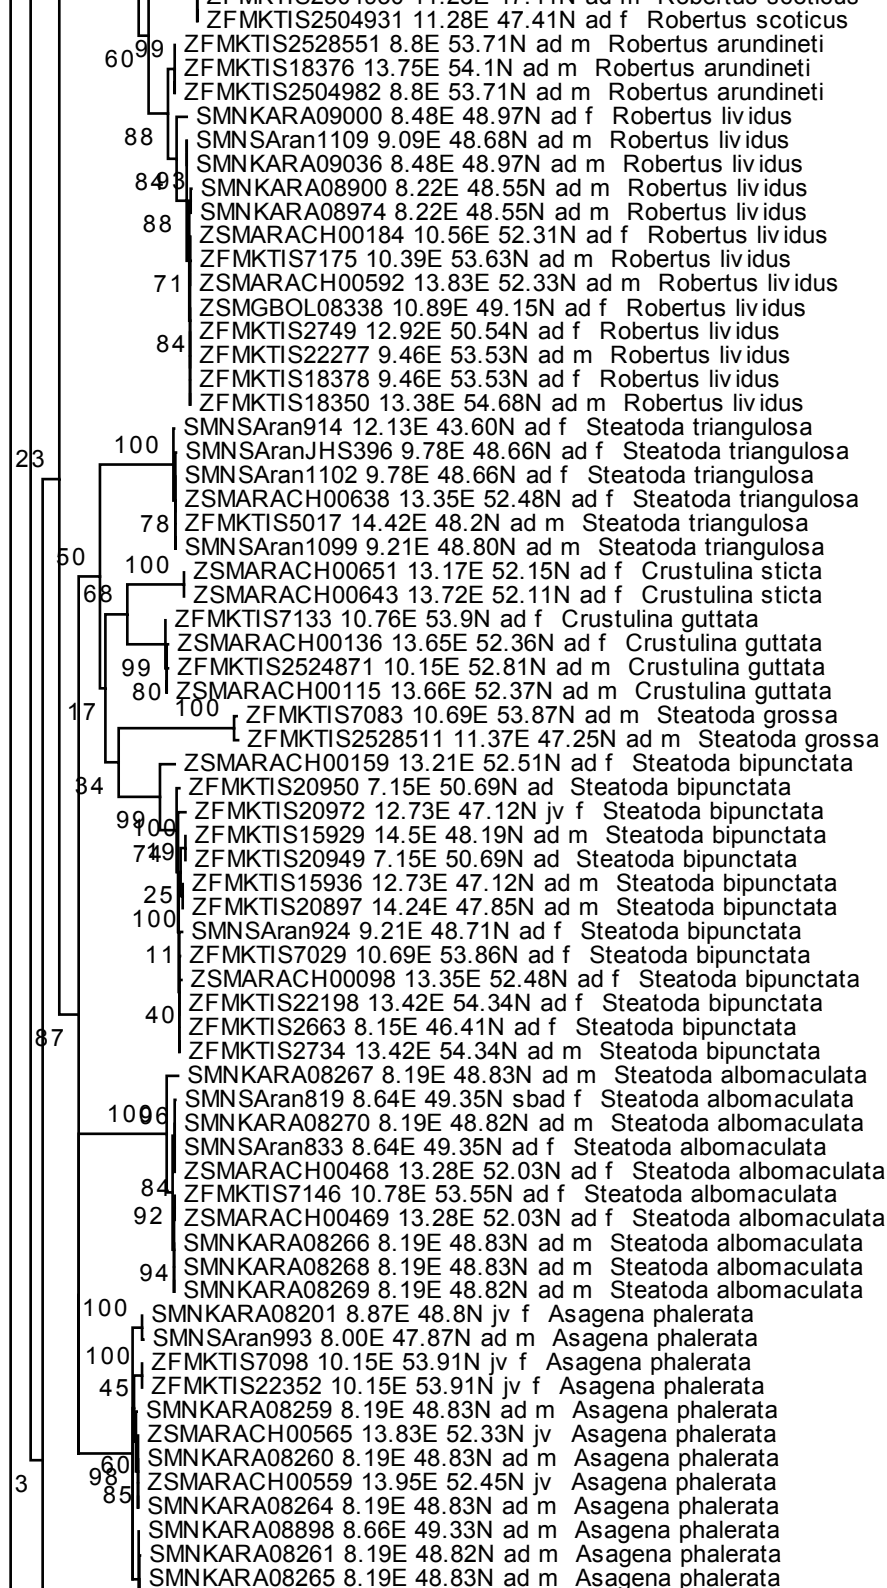

0.5

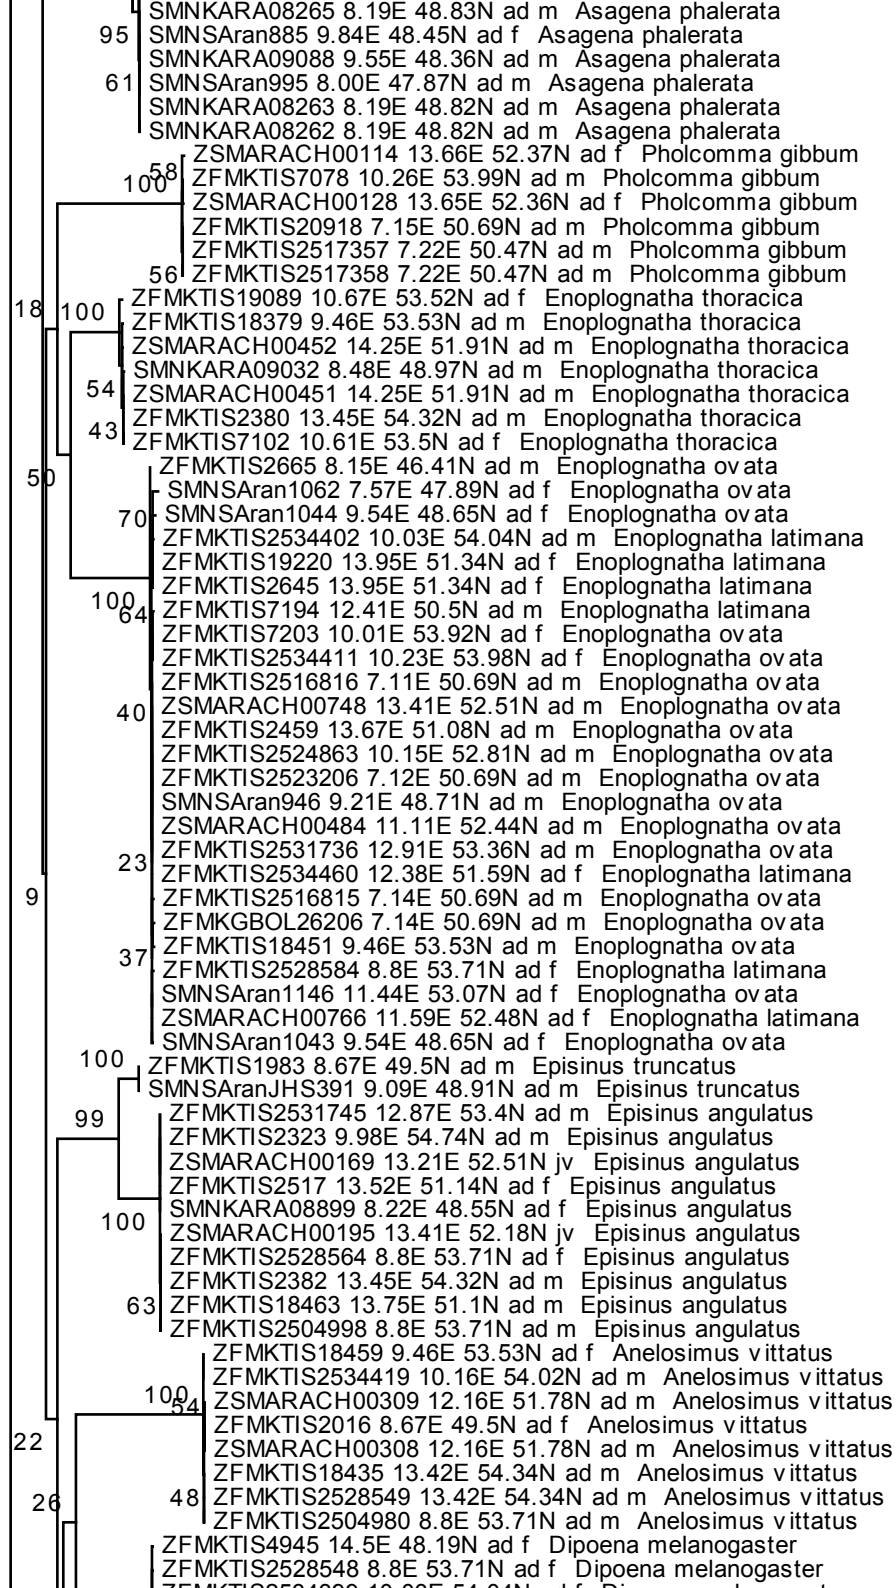

0.5



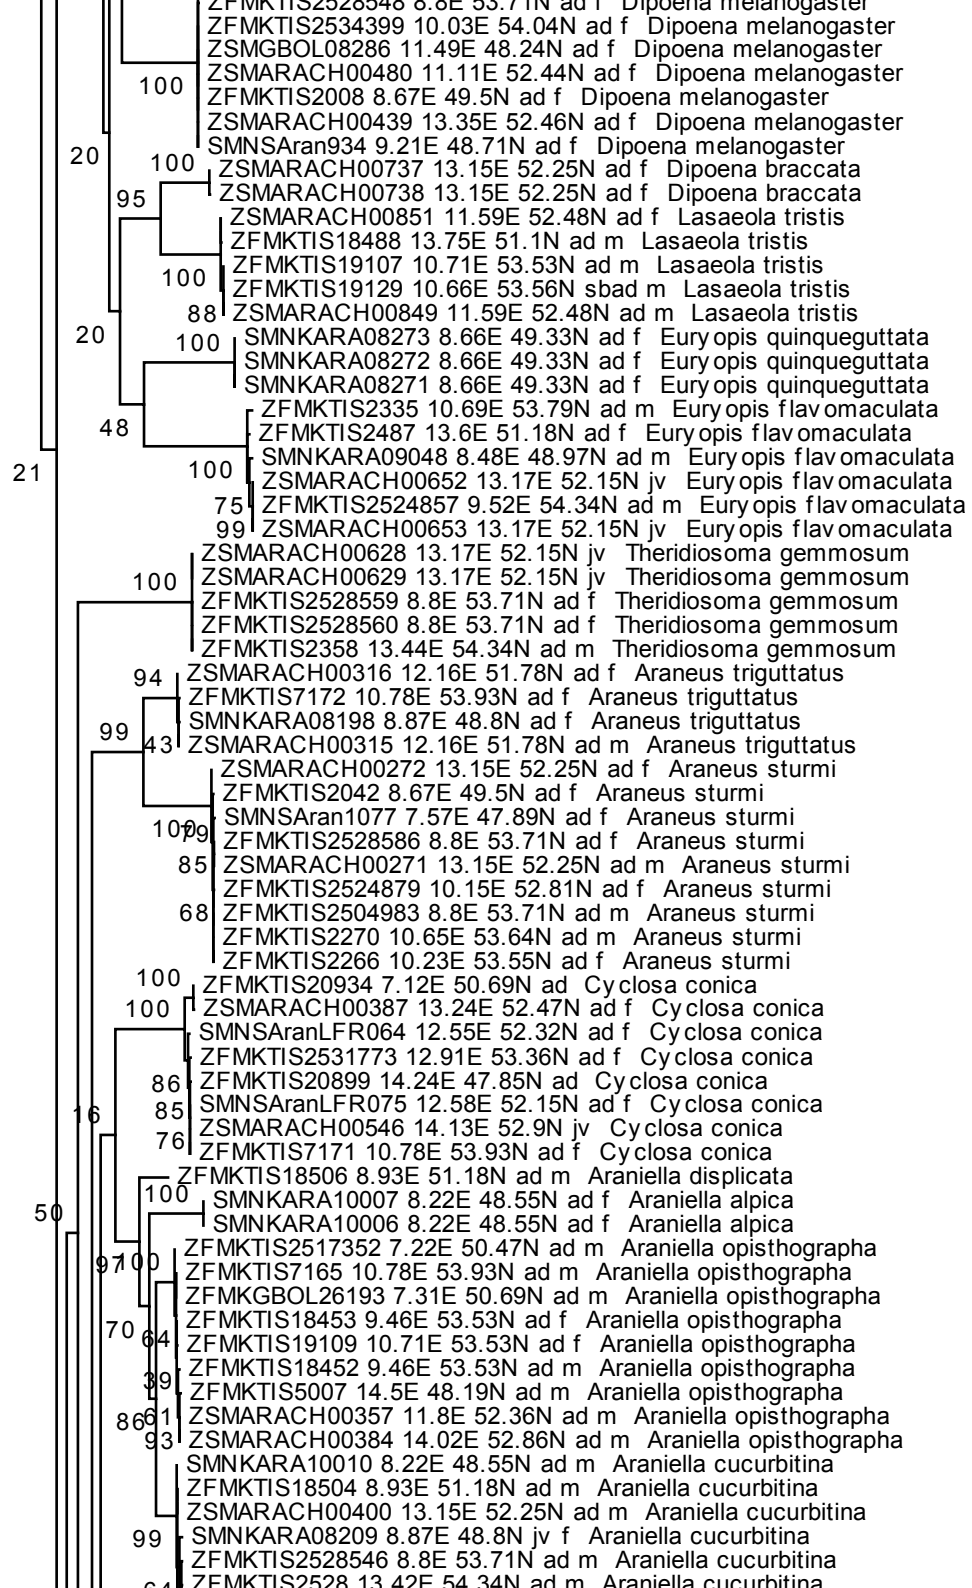

0.5

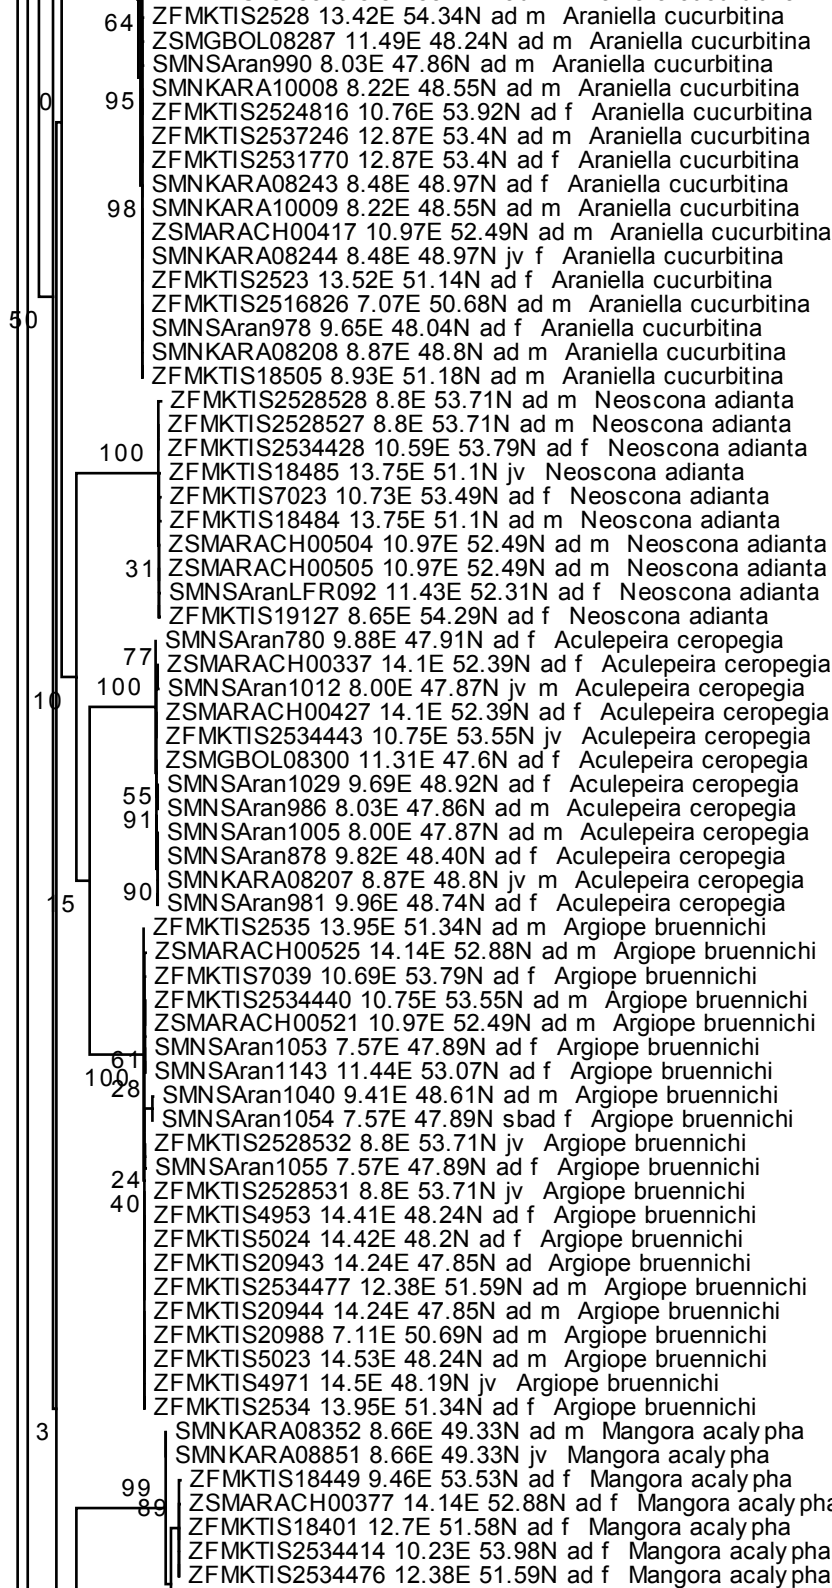

0.5

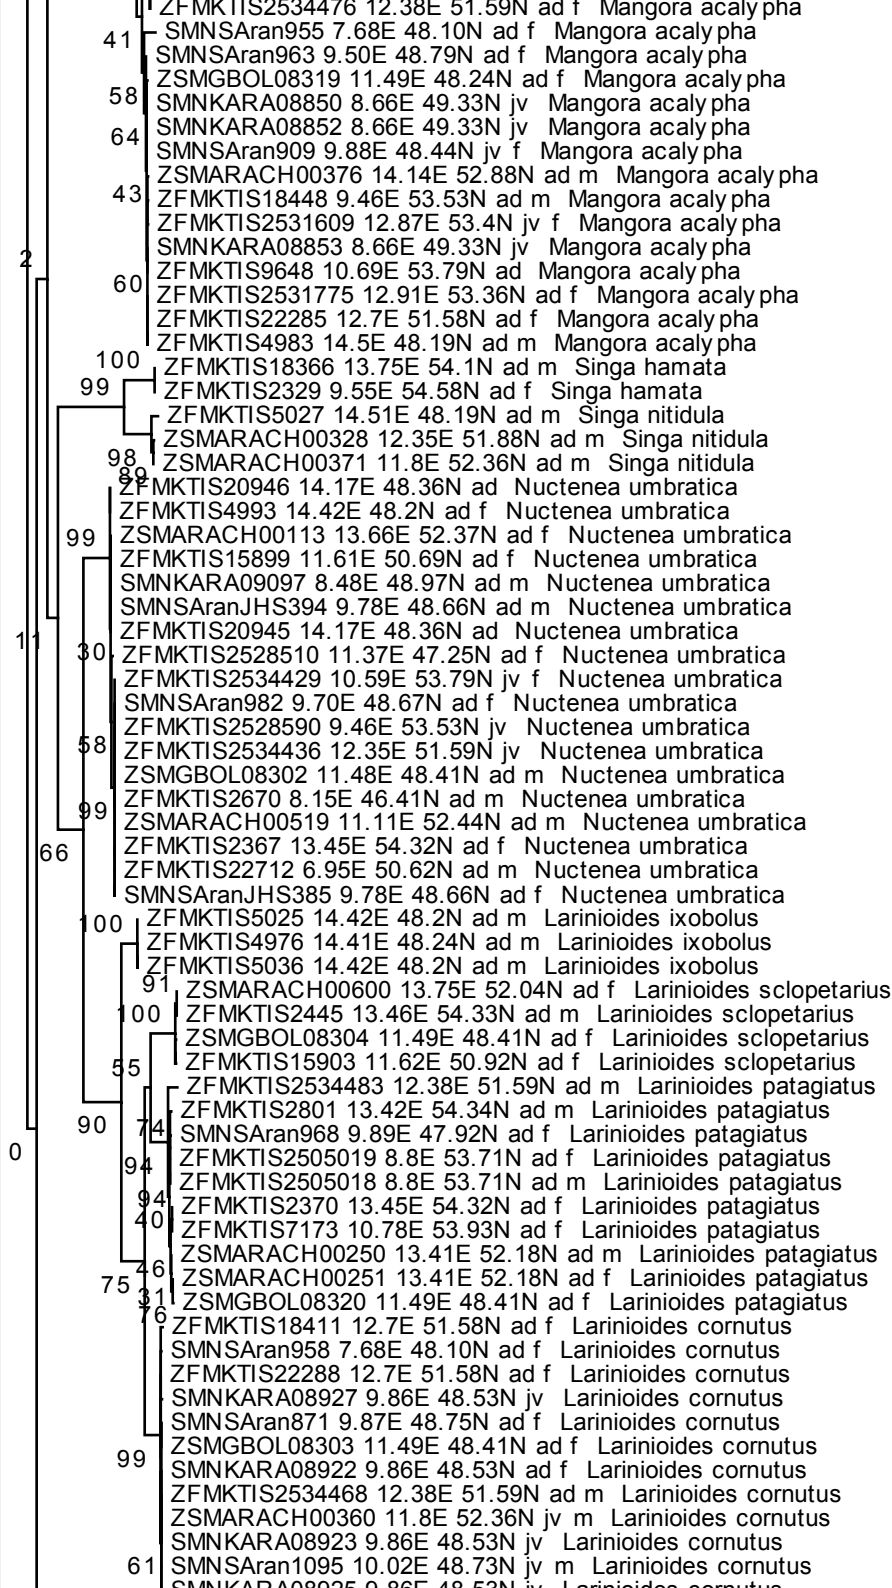

0.5

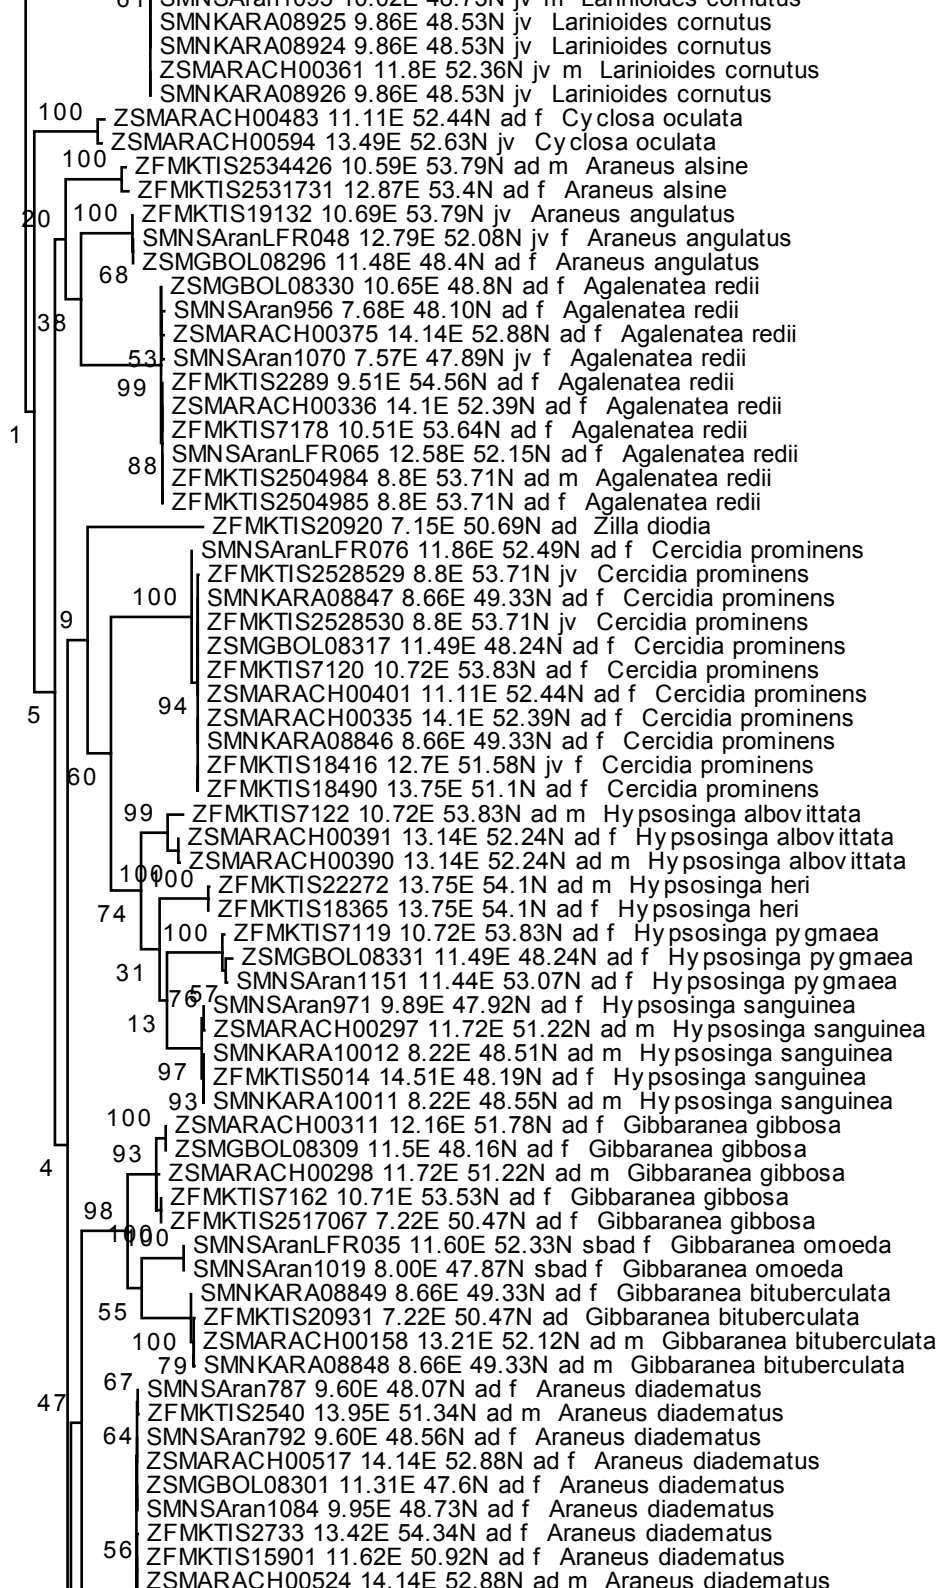

0.5



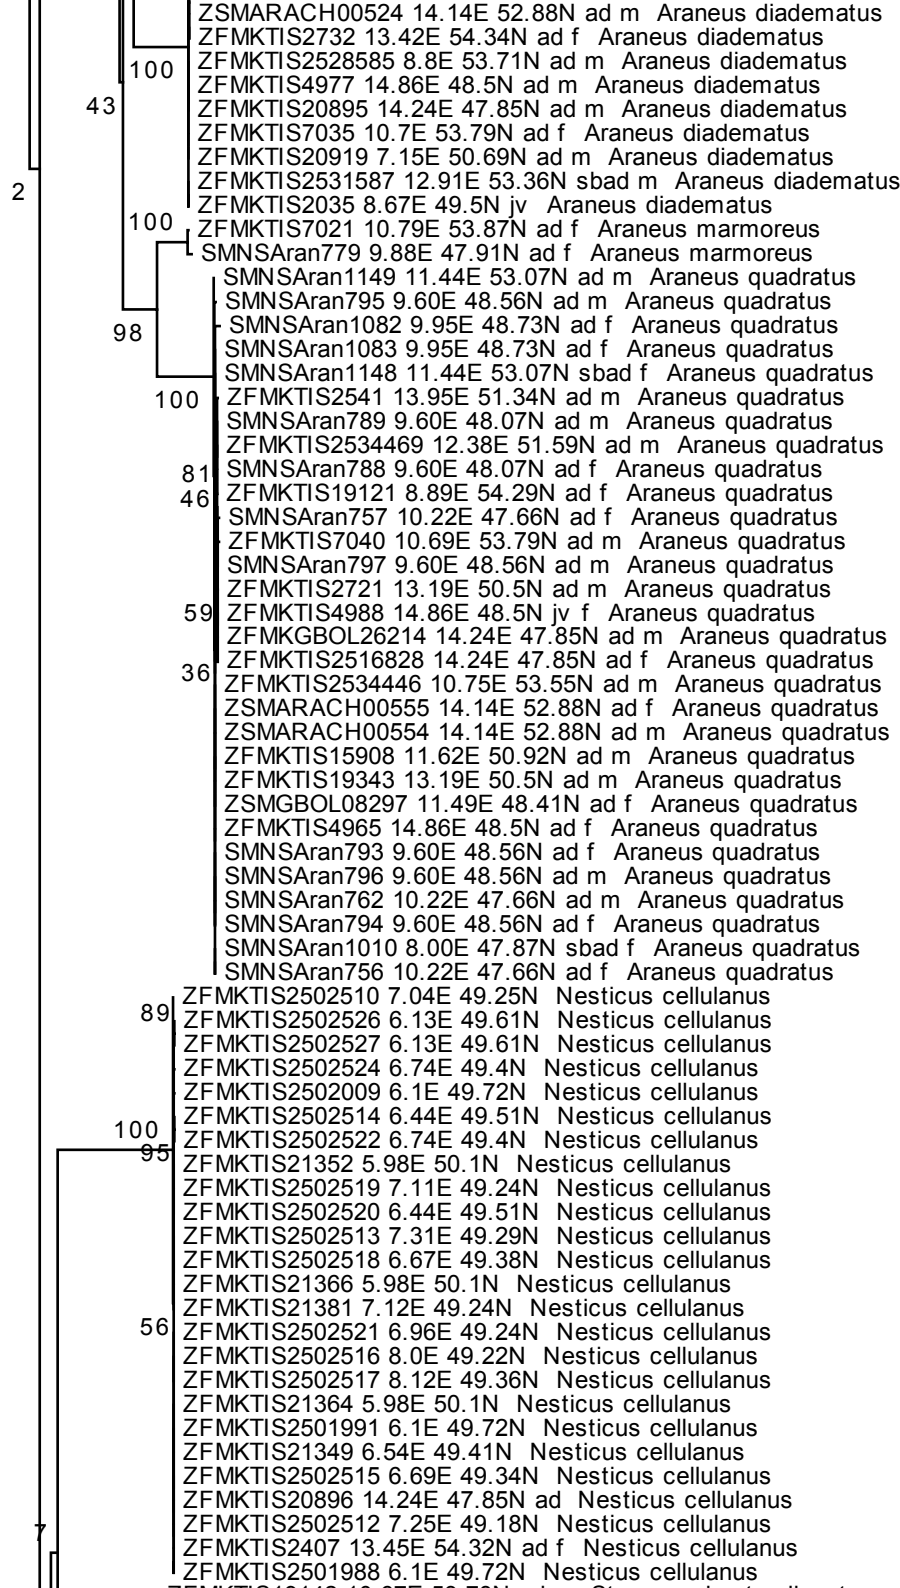

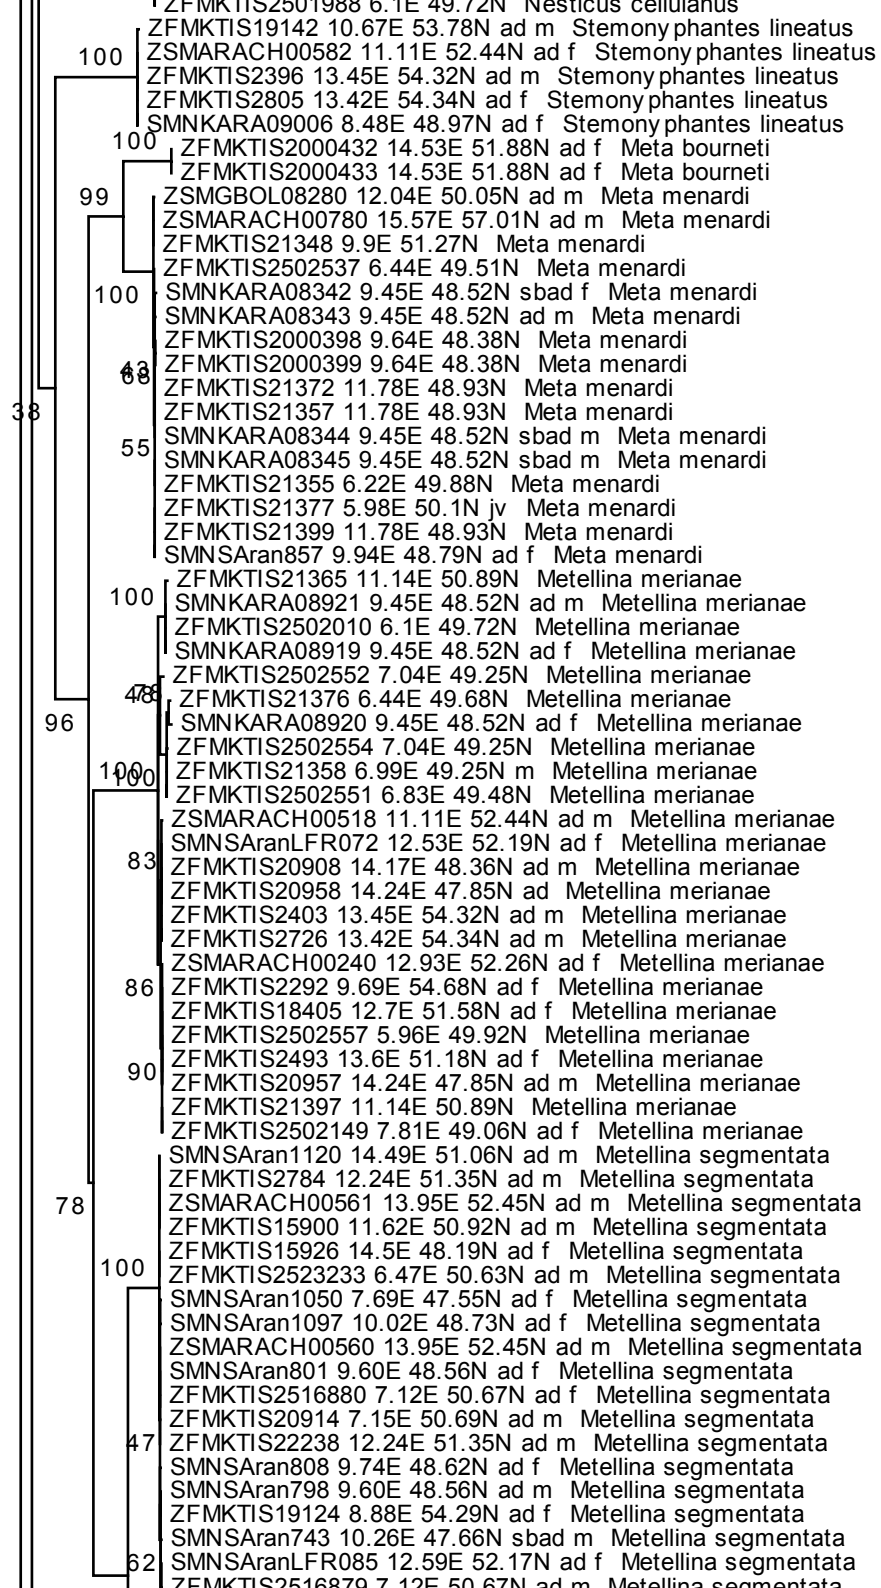

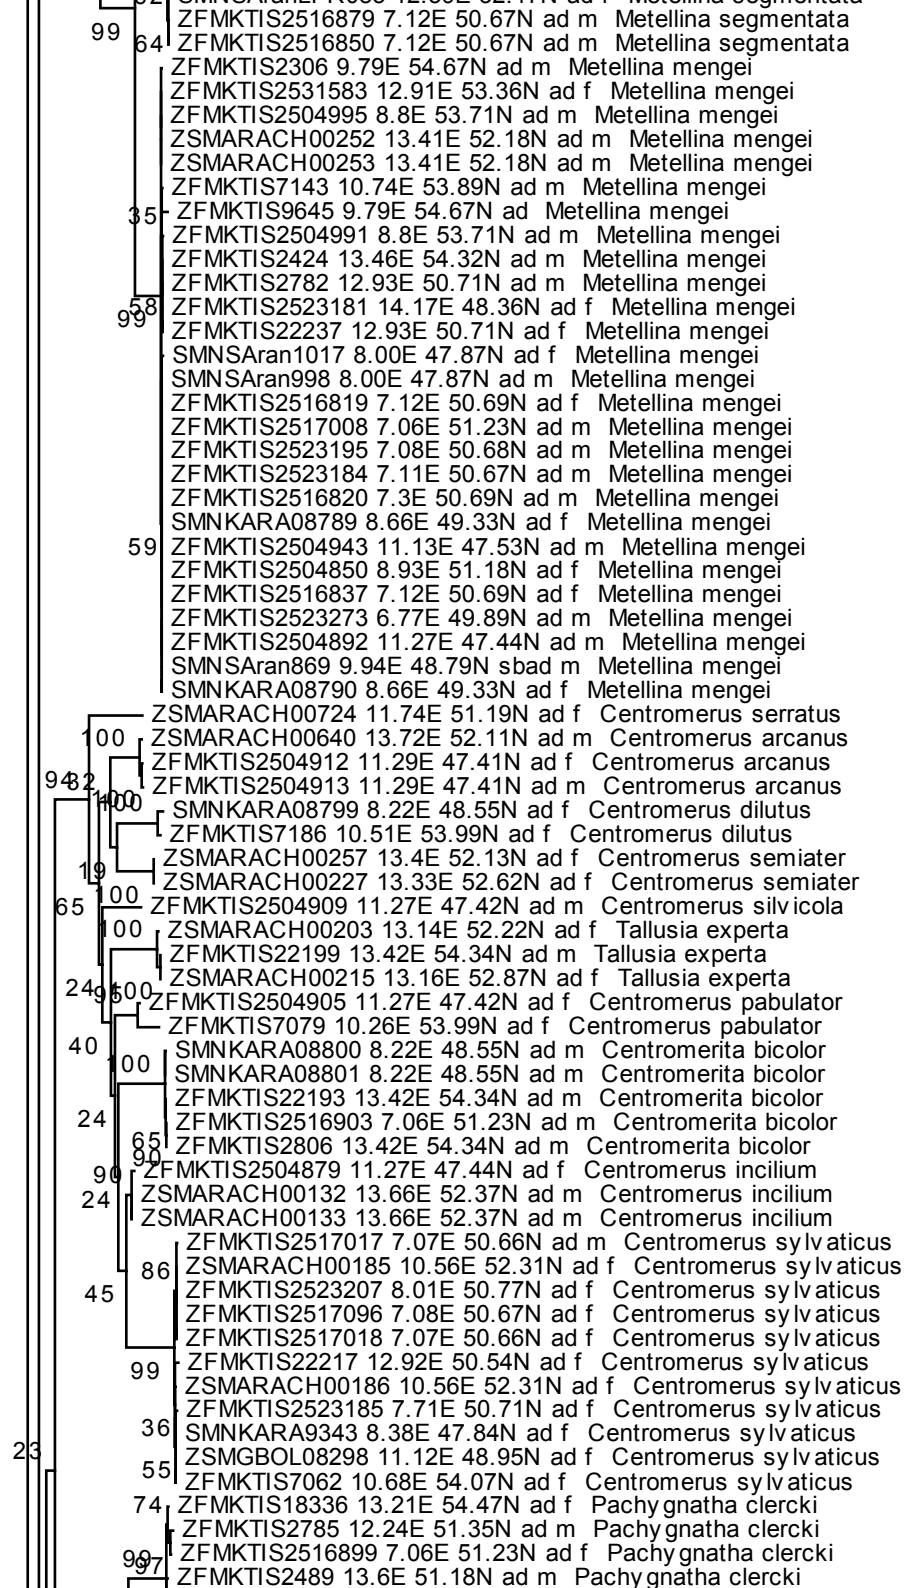

0.5

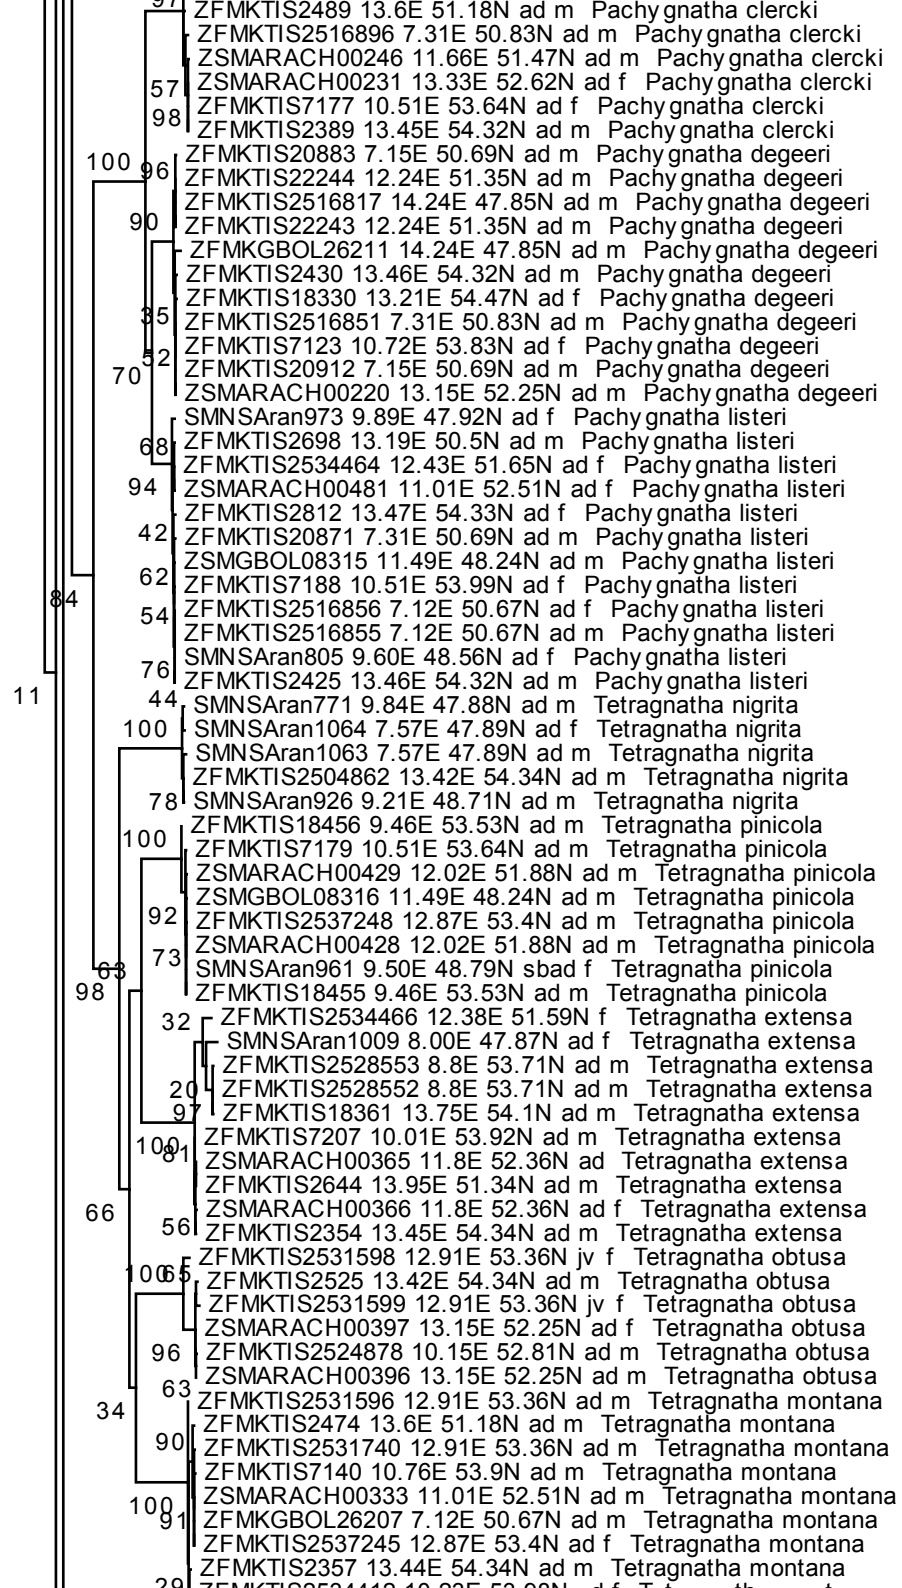

0.5



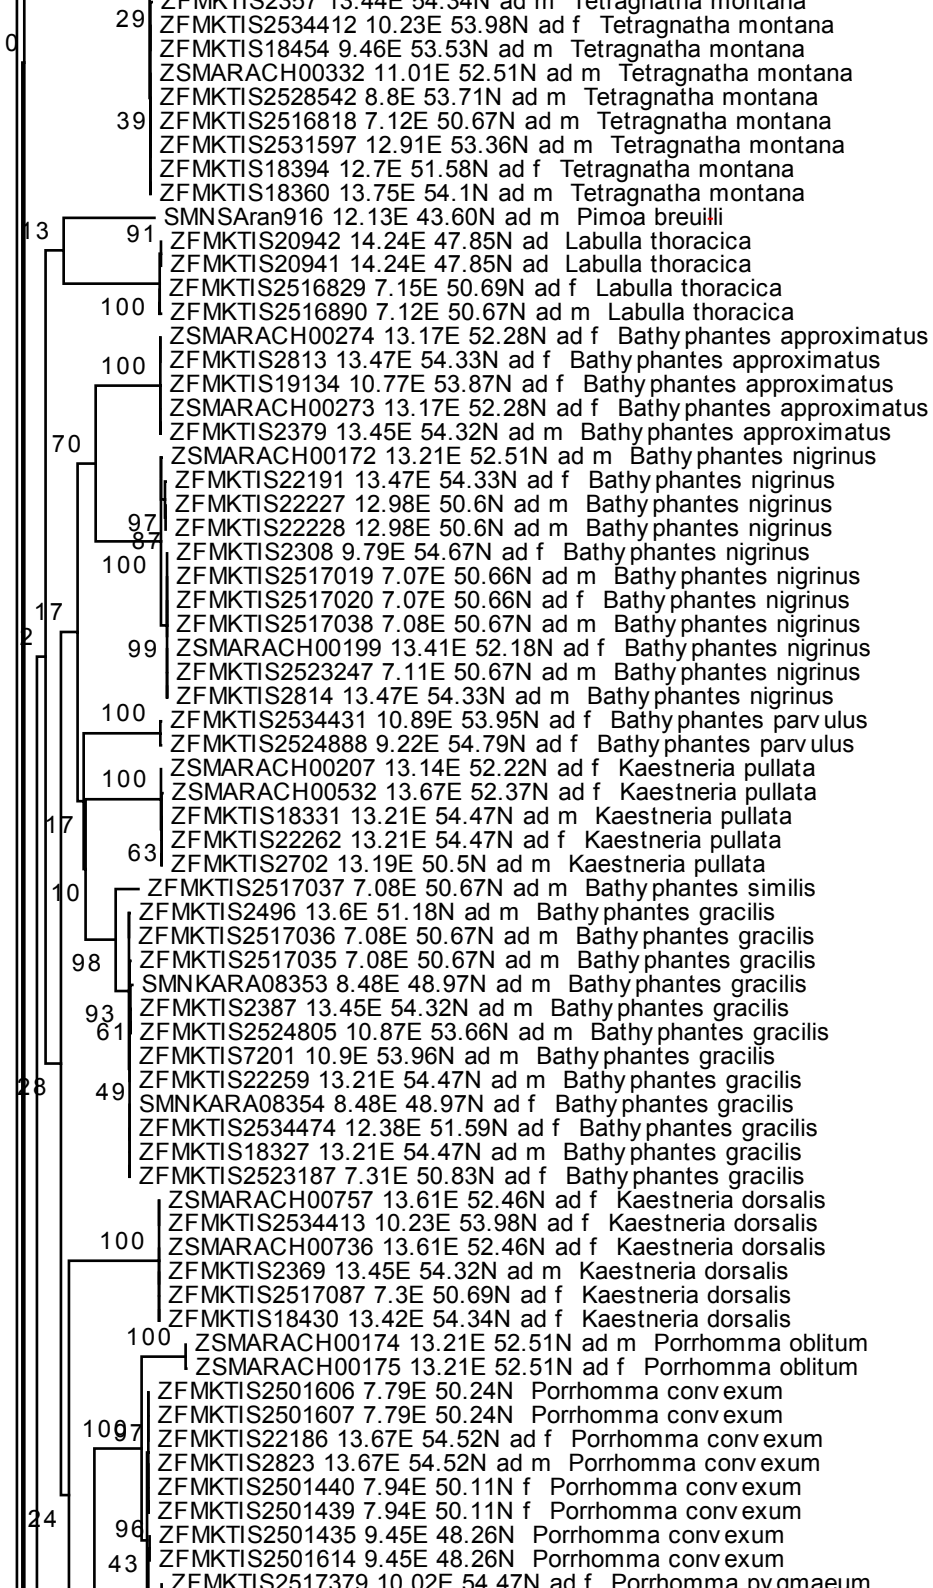

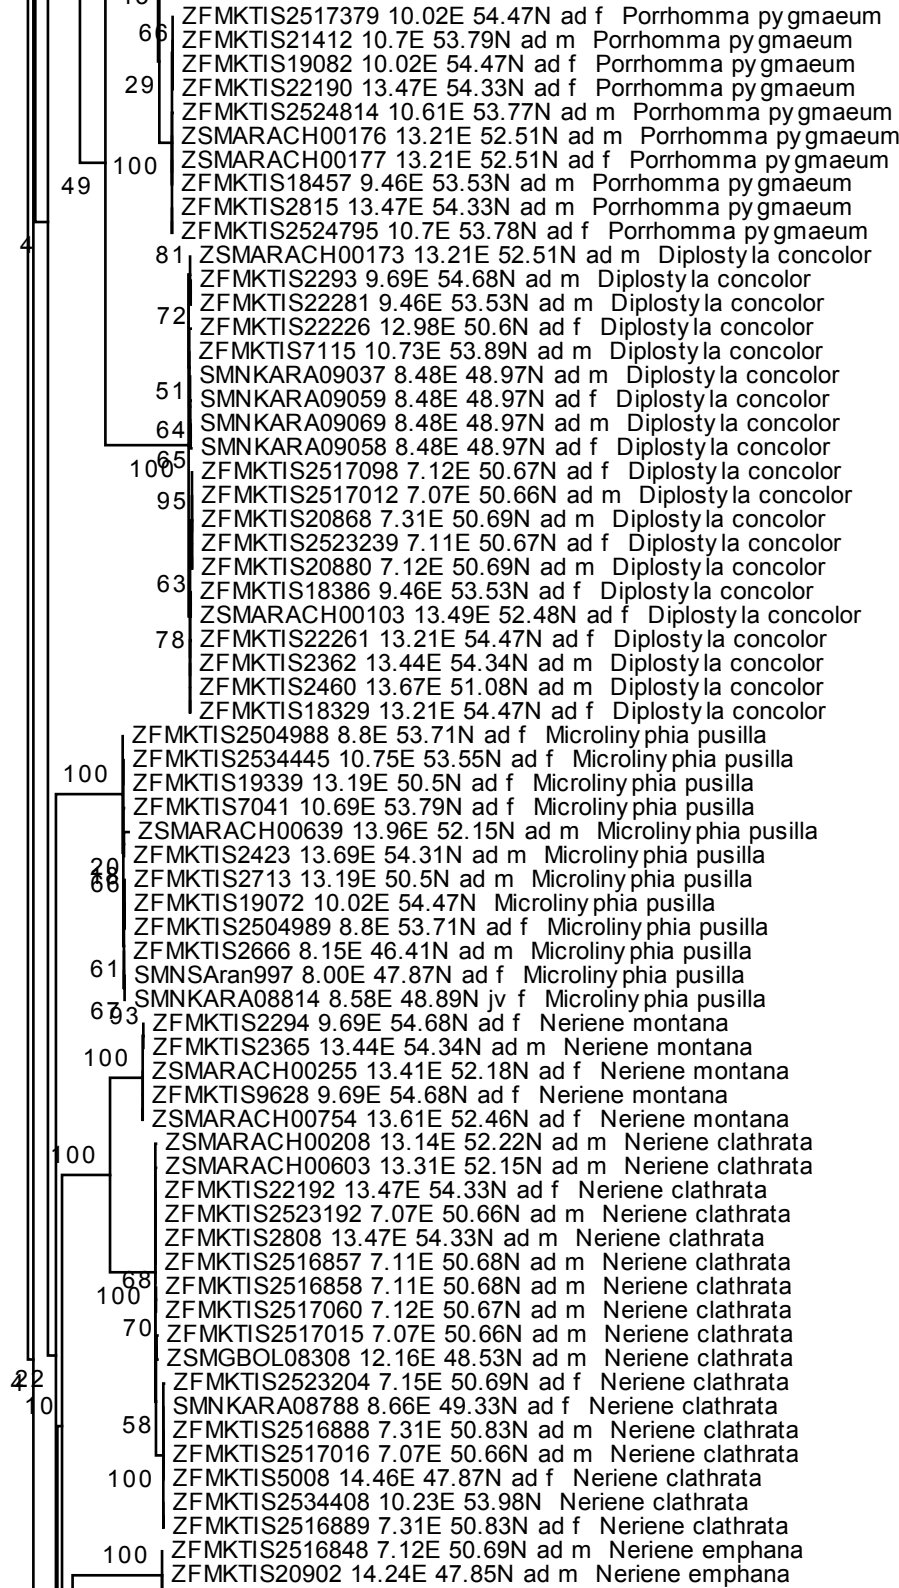

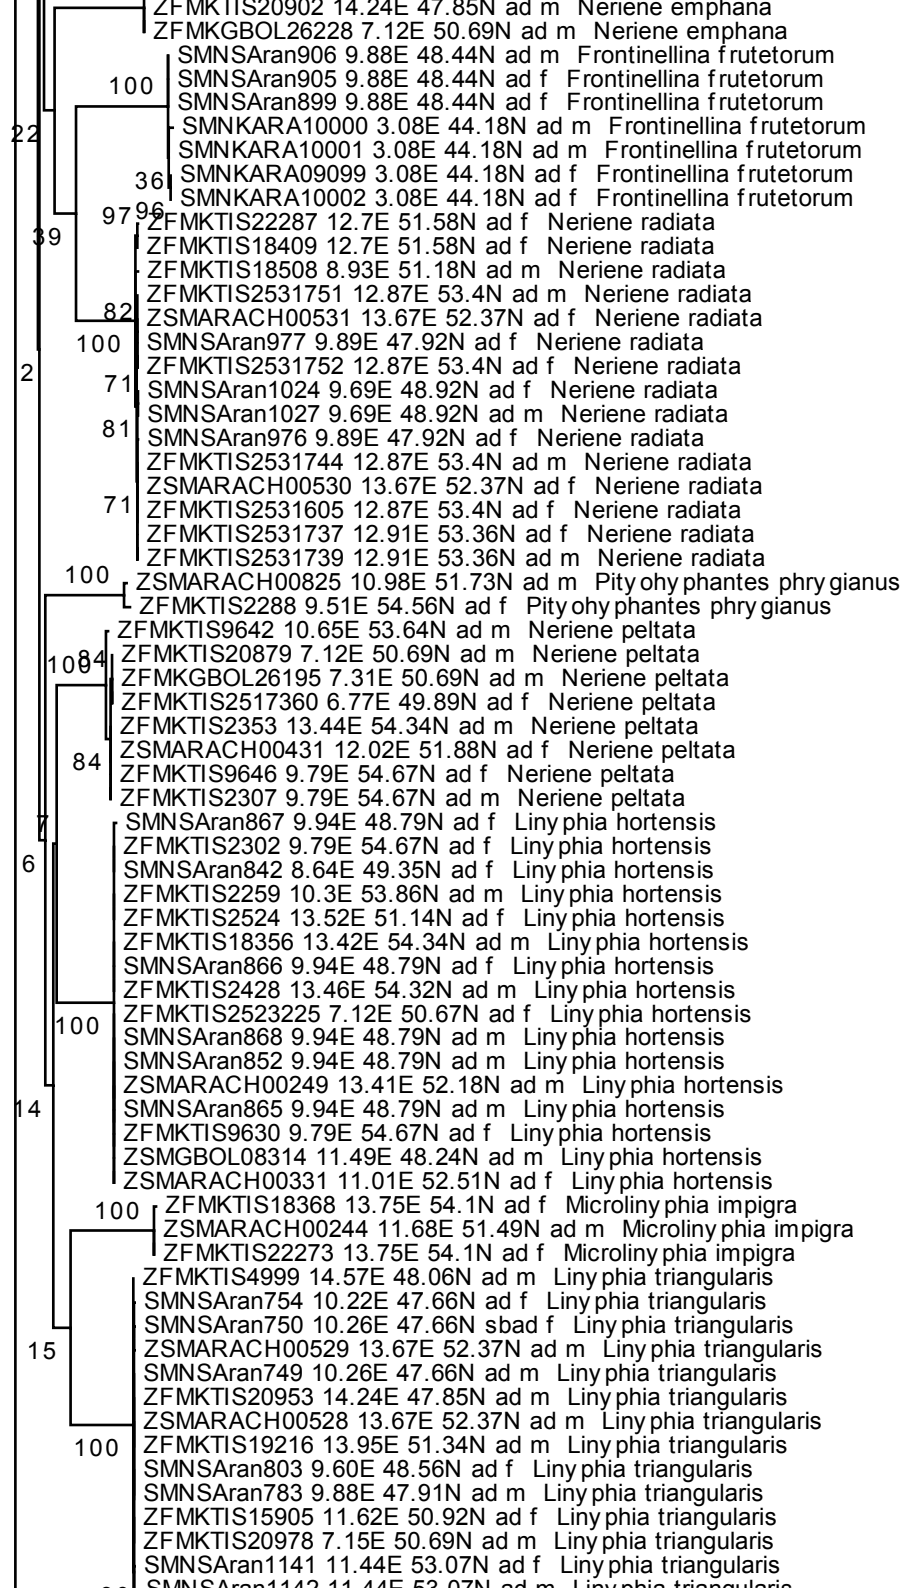

0.5

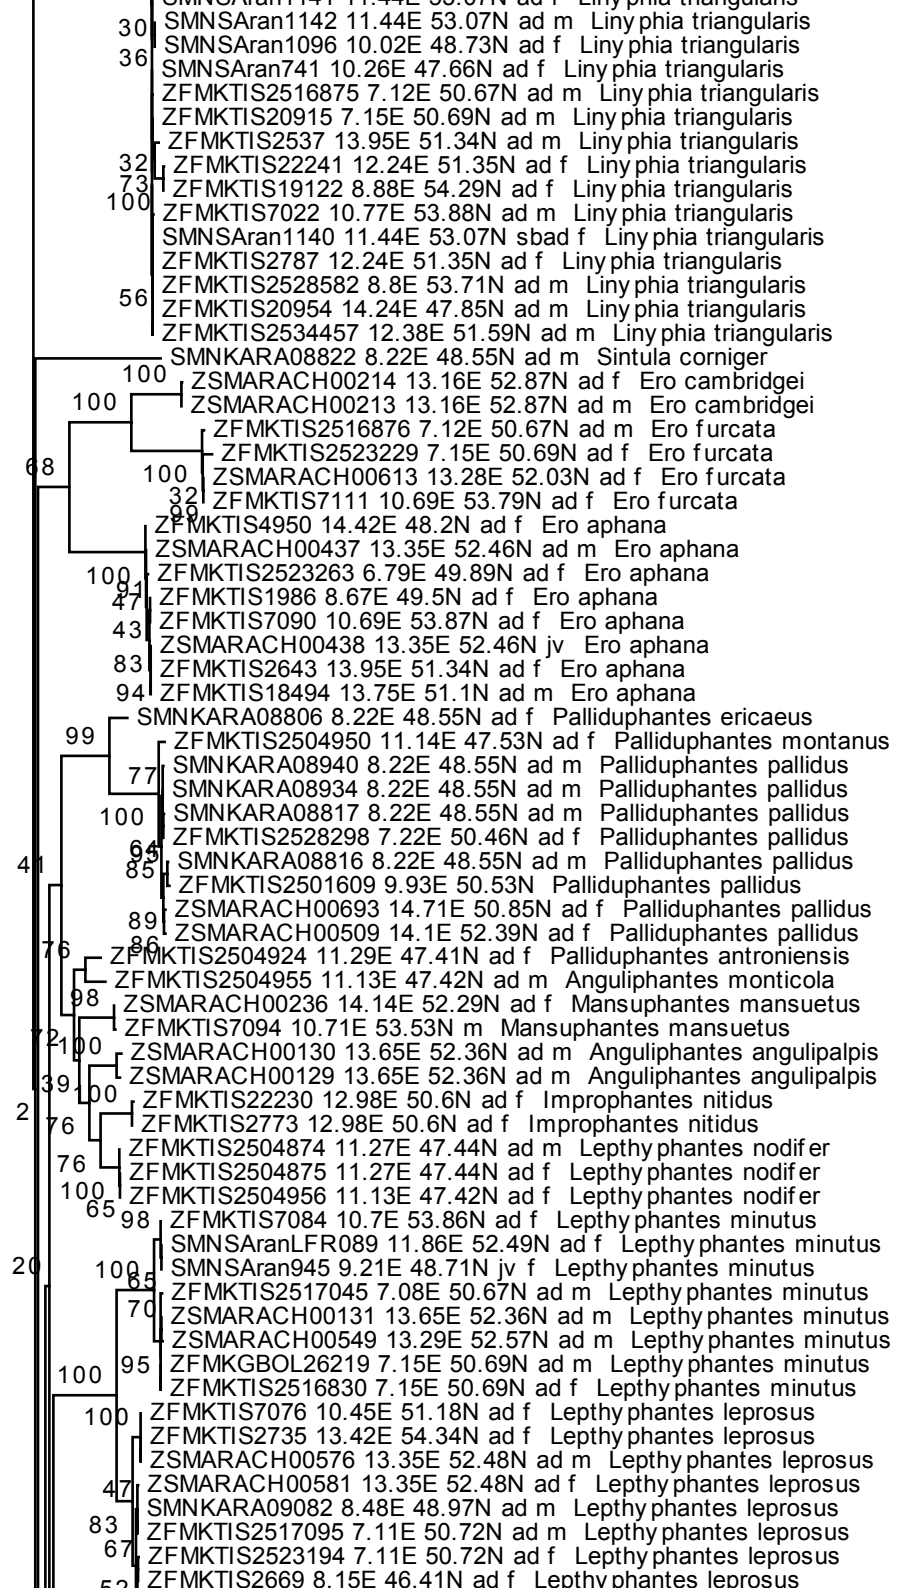

0.5



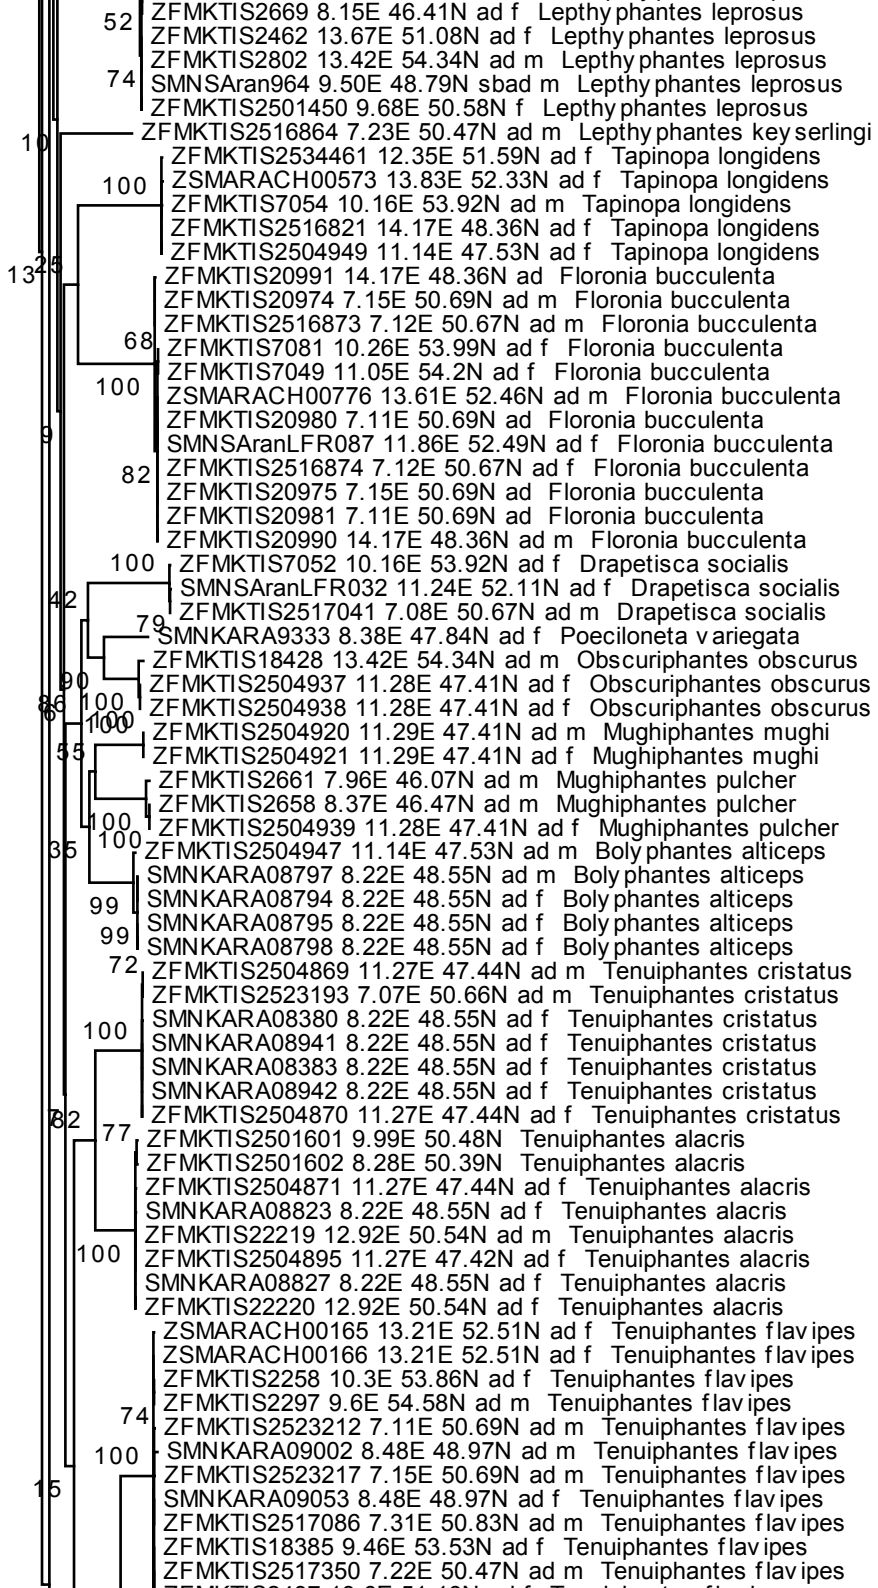

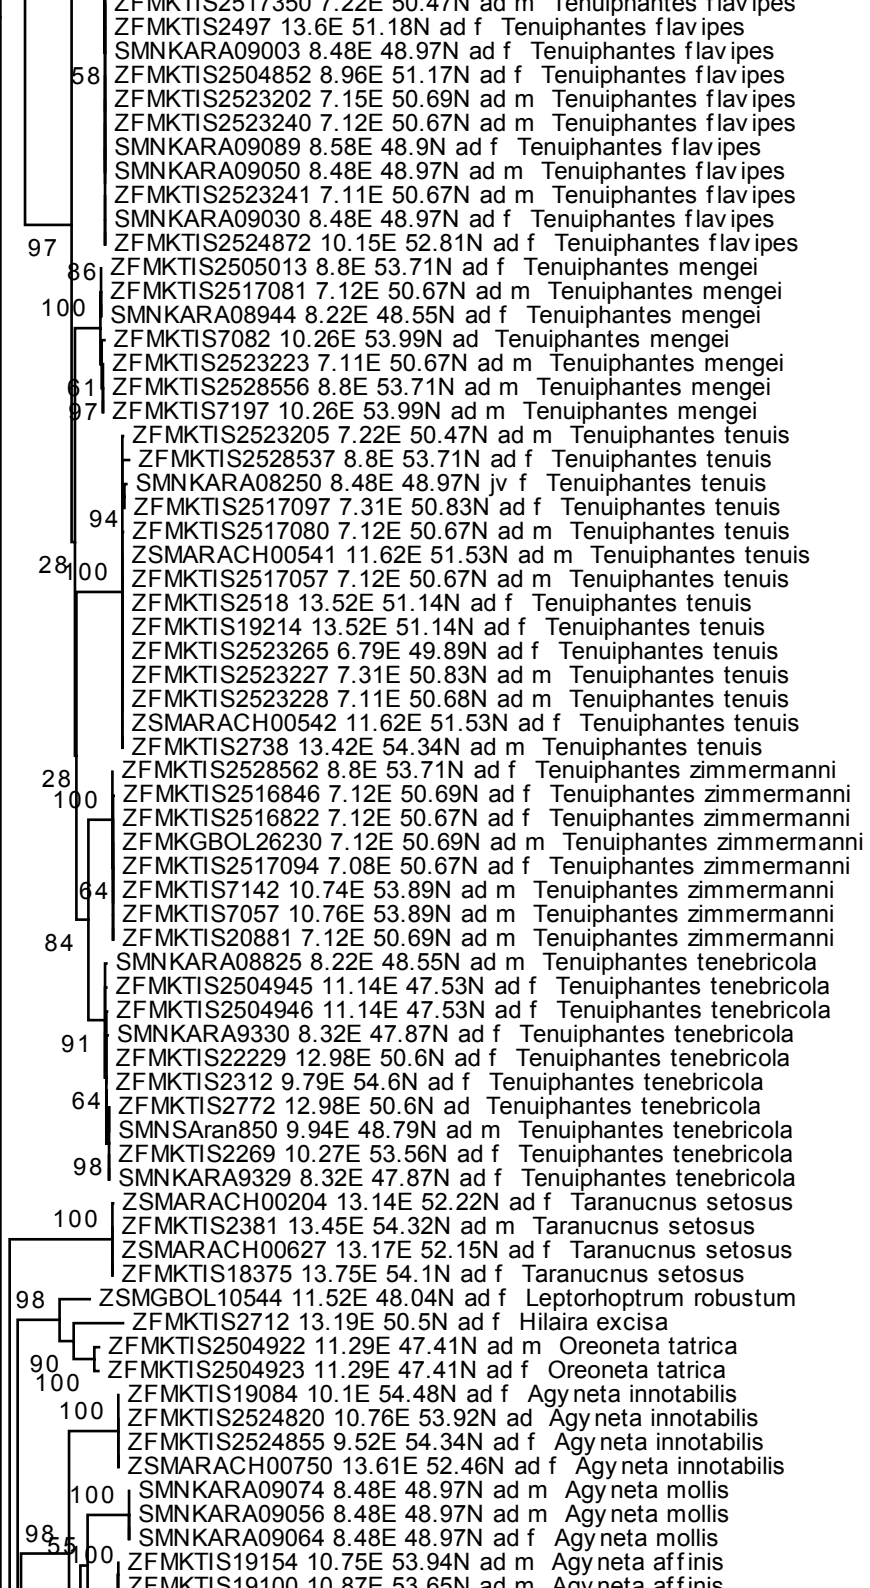



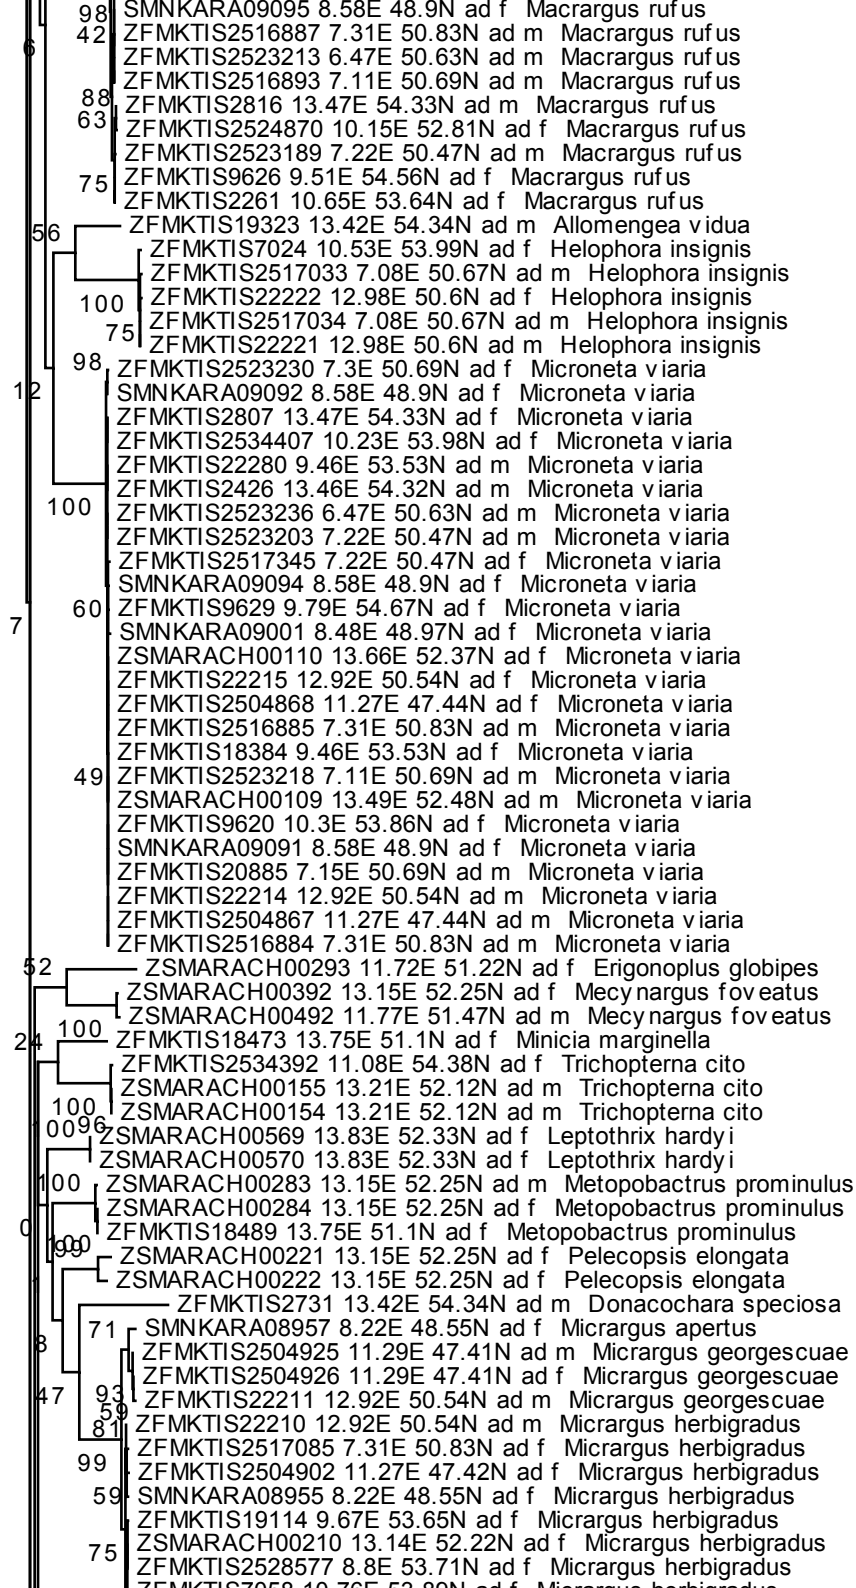



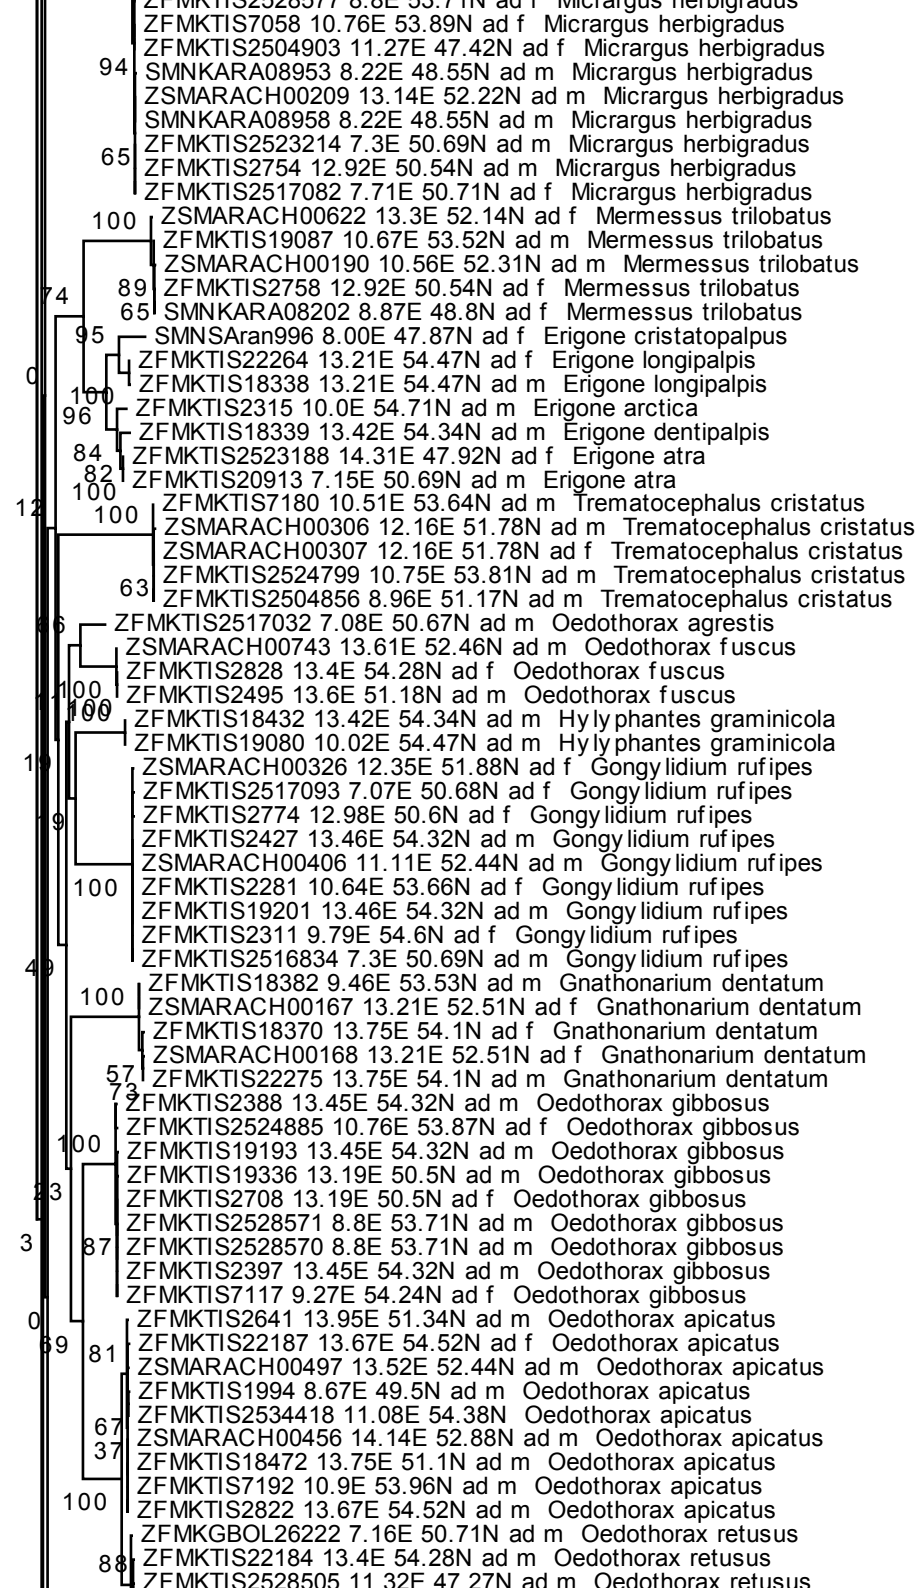

0.5

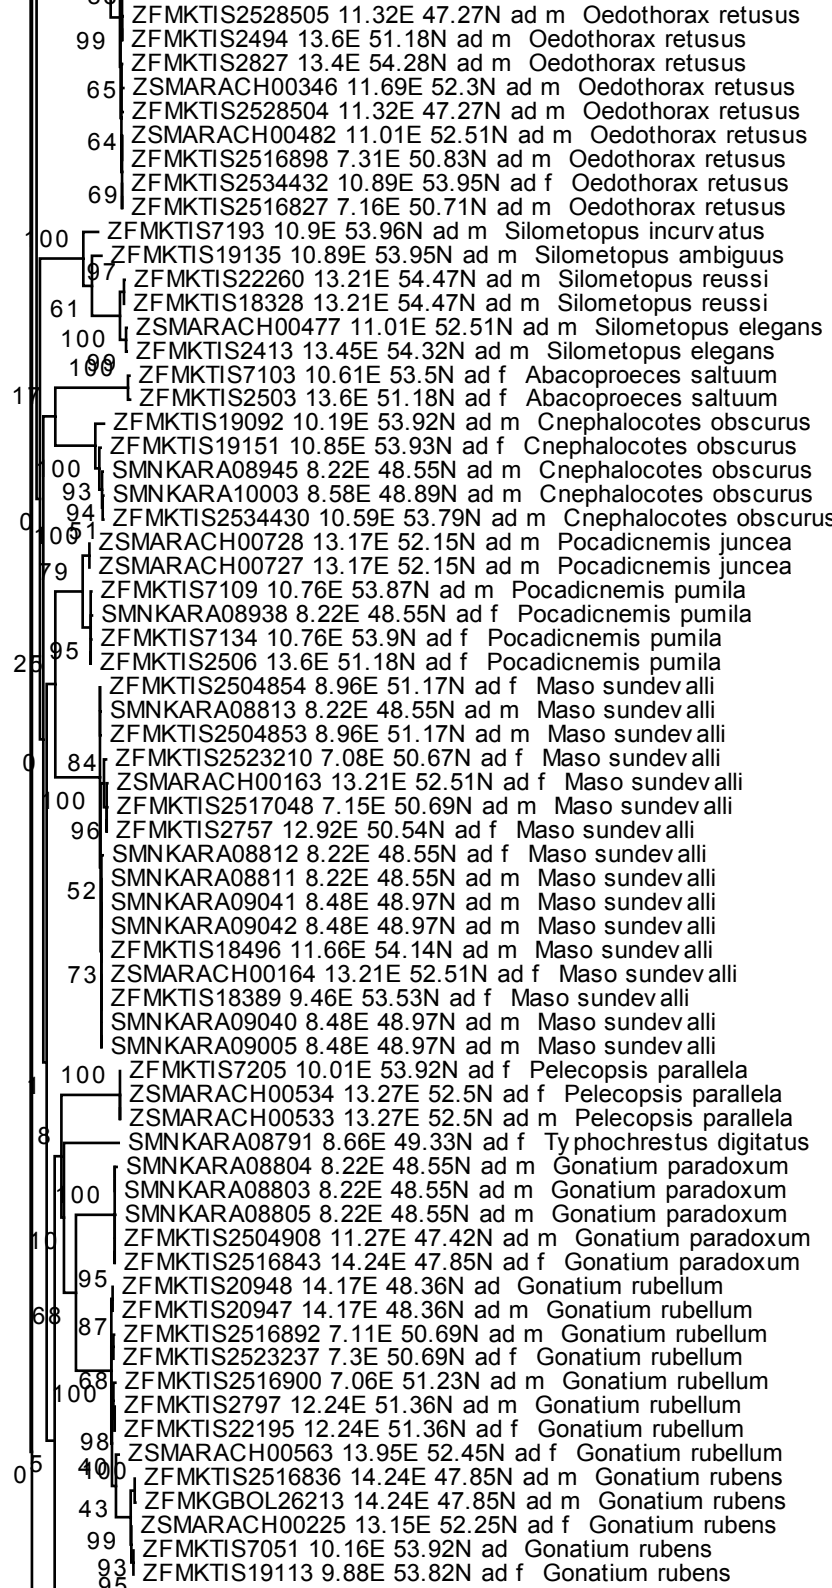

0.5

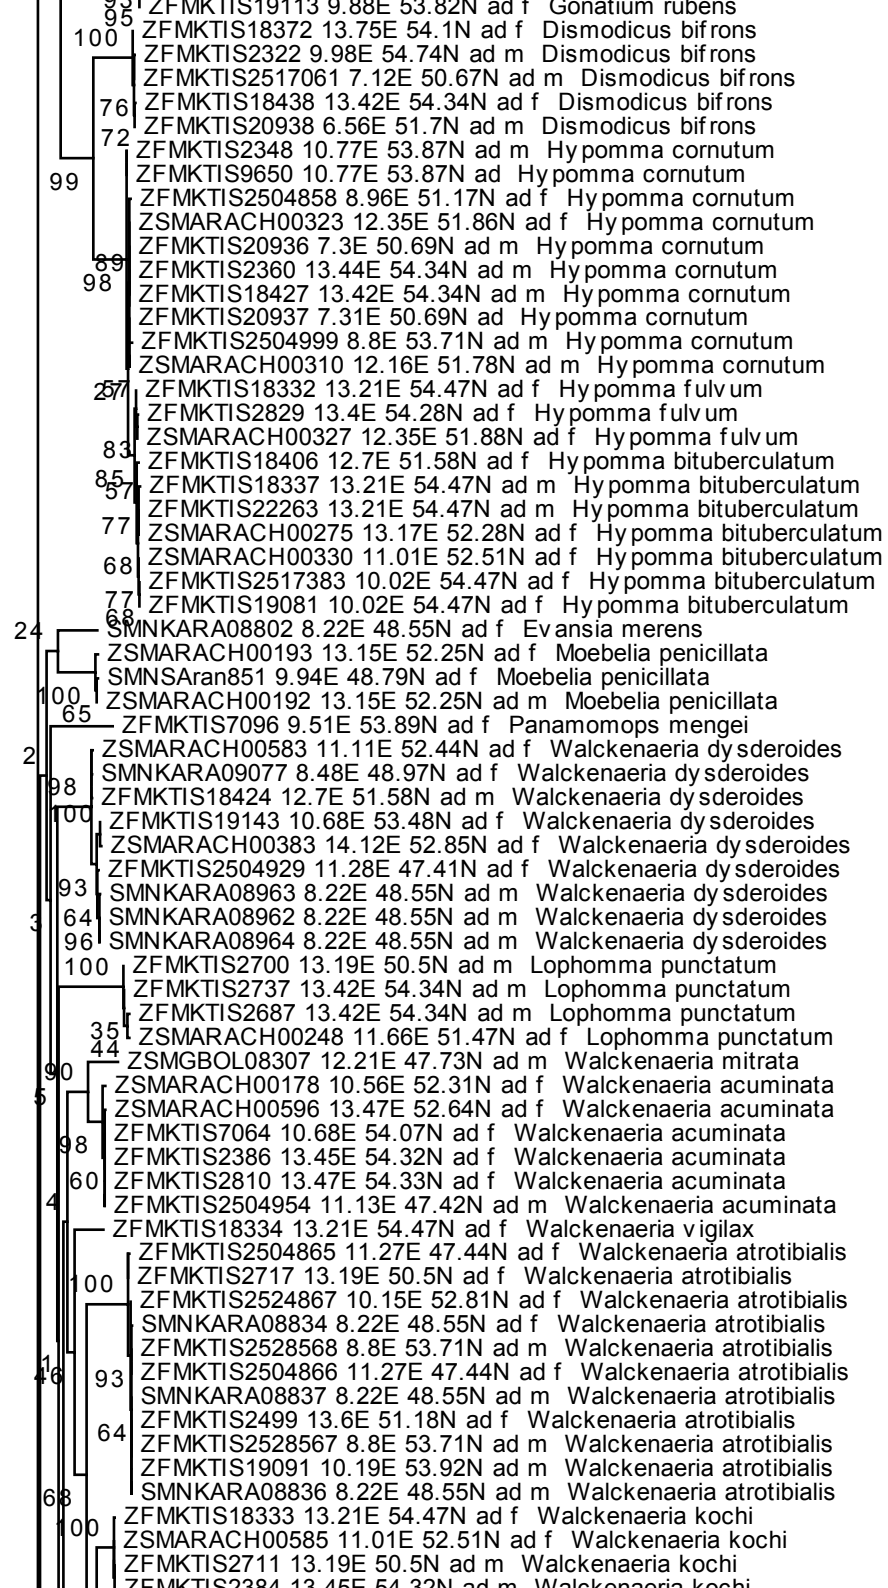

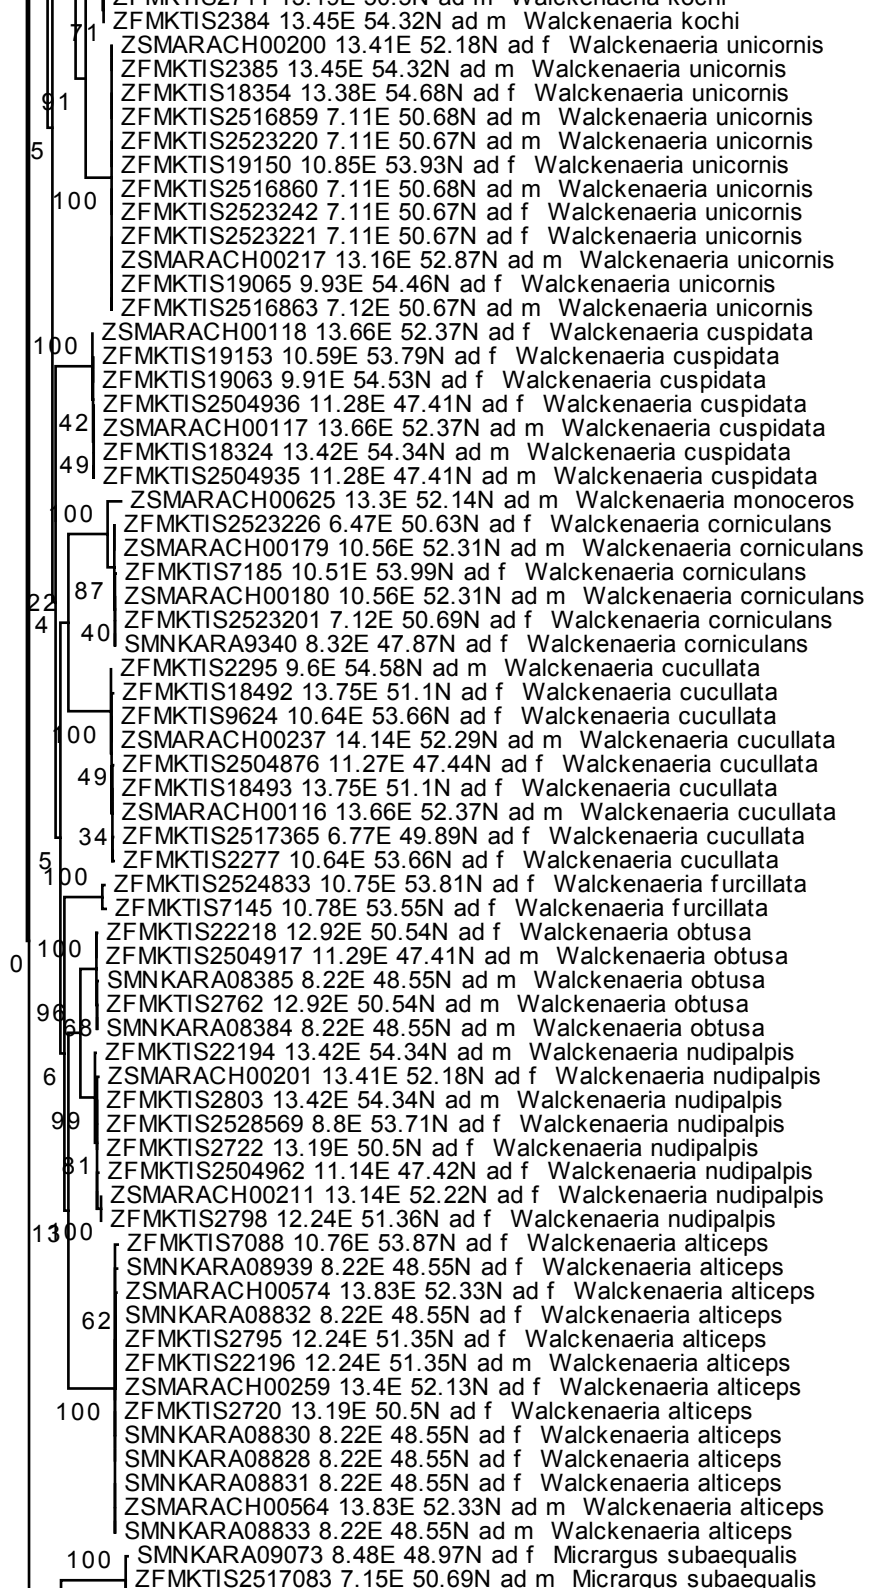

0.5



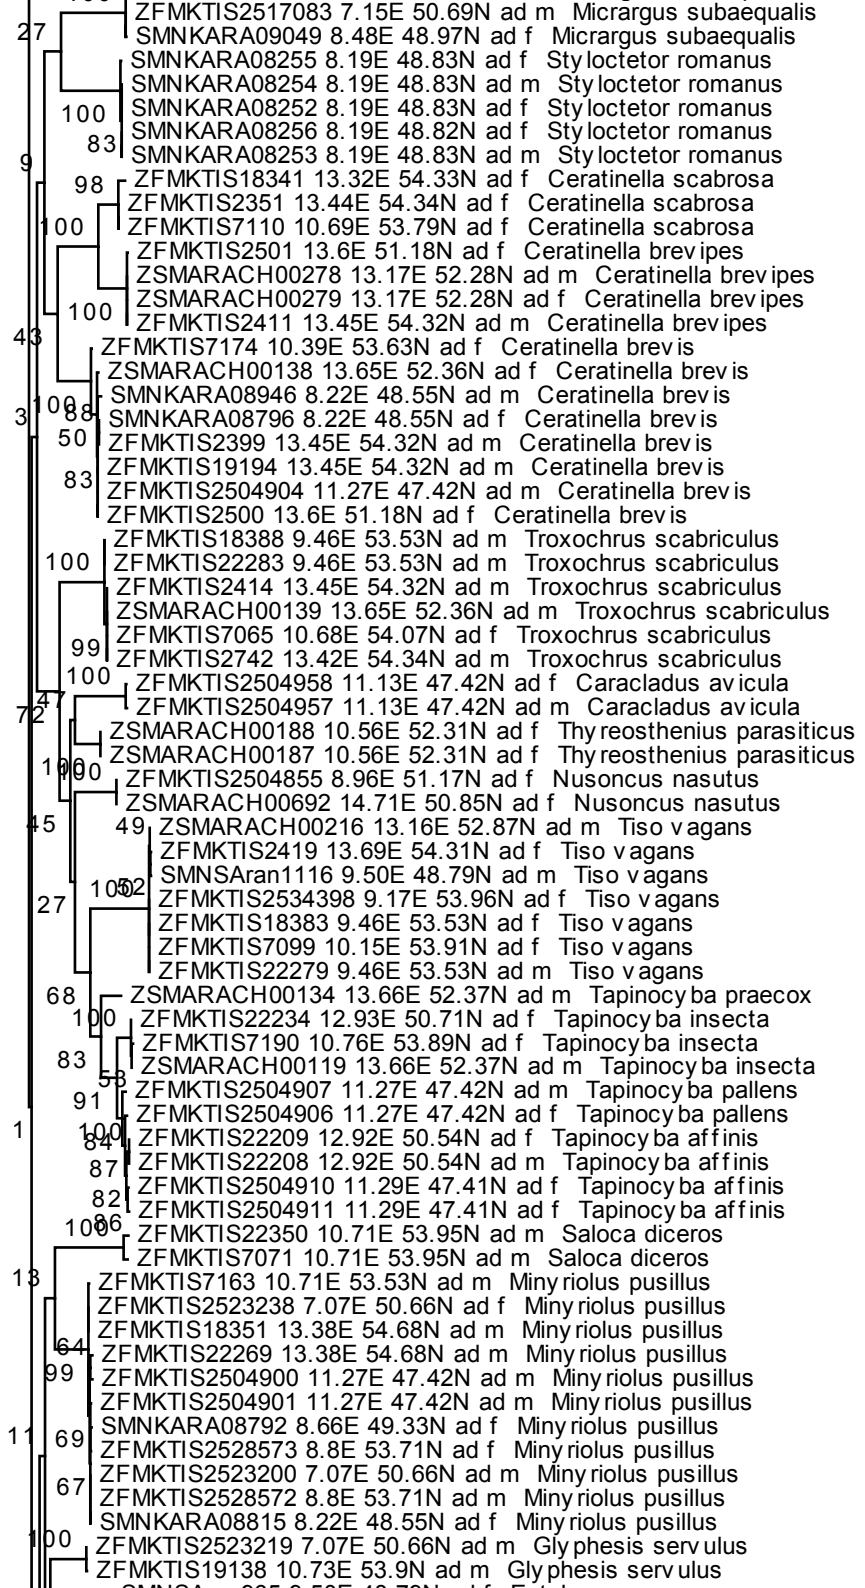

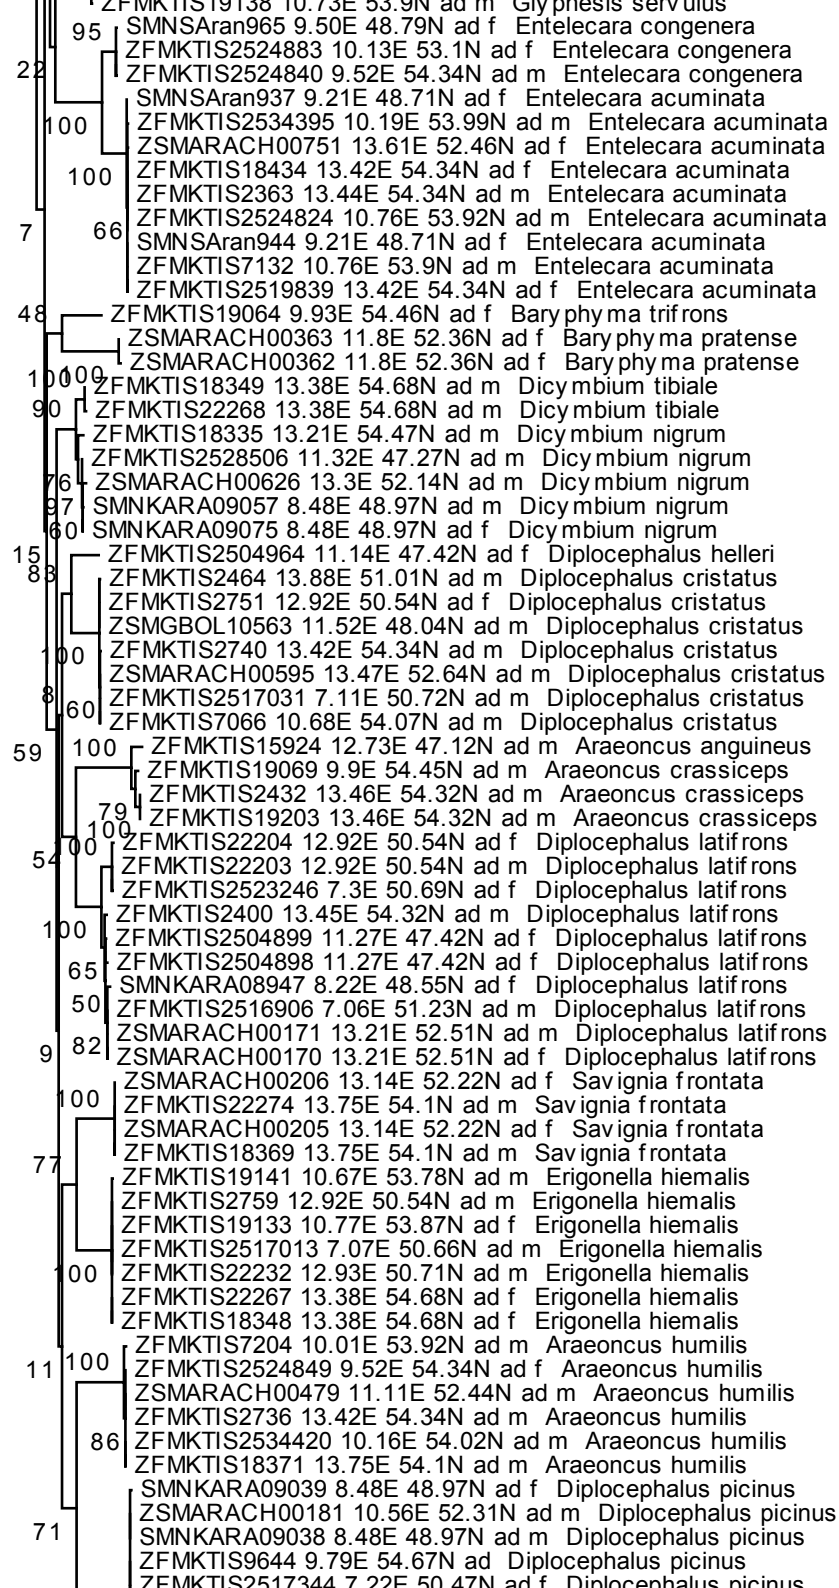

100 ZFMKTIS2517344 7.22E 50.47N ad f Diplocephalus picinus  
ZSMARACH00182 10.56E 52.31N ad f Diplocephalus picinus  
ZFMKTIS2781 12.93E 50.71N ad f Diplocephalus picinus  
ZFMKTIS18342 13.32E 54.33N ad m Diplocephalus picinus  
SMNKARA09031 8.48E 48.97N ad m Diplocephalus picinus  
ZFMKTIS2364 13.44E 54.34N ad m Diplocephalus picinus  
ZFMKTIS18387 9.46E 53.53N ad f Diplocephalus picinus  
ZFMKTIS2517099 7.3E 50.69N ad f Diplocephalus picinus  
ZFMKTIS22282 9.46E 53.53N ad f Diplocephalus picinus
