# Supplementary material for: Towards a DNA Barcode Reference Database for Spiders and Harvestmen of Germany
Source: PLoS One. 2016 Sep 28;11(9):e0162624. doi: 10.1371/journal.pone.0162624 (PMC5040438; doi:10.1371/journal.pone.0162624)
Supplement: S1 Alignment — Includes the mite outgroup retrieved from BOLD: BOLDMSACA57112_OG_Acari. FASTA-formatted. See S1 Table for more details on specimens. (FAS) [file pone.0162624.s001.fas]

>BOLDMSACA57112_OG_Acari
ctttatatcttattttcagagcttgatctggtatgctgggcaccgccctgagagttttaa
tccgtagagaactcggttctccggggtcctctattggagatgatcaaatctttaacgtaa
tcgtaacagcccatgcttttgtaataattttttttatggtaatgcctgctatagtagggg
gattcggtaattgactcgtcccattaataattggagctccagatatagctttcccgcgca
taaacaatataagtttttgactacttcctccttctttaattctgctgtcttcttcagctt
tagttgaaagtggtgctgggacagggtgaacagtctatcctcctttgtctagtaacatct
ctcatagagggggtagtgttgacttagctattttttctcttcacctagctggtttatcat
ctatccttggatcgattaactttatcacaacaattataaacatacgccctcatcatataa
cccttgaccaactccctttatttgtatgatctattttacttacgactattcttcttcttc
tttctcttccggtgctggcaggagcaatcactatacttctaactgatcgtaatttcaata
cctccttttttgaccctgcggggggtggagacccgattctttaccagcattta
>SMNKARA08138_Pardosa_palustris_8y87E_48y8N_ad_f_A_Lycosidae
ctttatatttaatatttggggtttggtcagctataatagggactgctataagagtattaa
ttcgaatagaattaggaaatcctgggagattgttaggagatgatcatttatataatgtta
tagttactgctcatgcttttgtaataattttttttatagtaataccaattcttattggag
gttttggtaattgattagttcctttgatattaggagctccggatatatcgtttcctcgaa
taaataatctttctttttgattattacctccttctttatttttattatctatatcttcta
tagtggagataggagttggtgctggatgaactgtttatcctcctttagcatctacagttg
gtcatataggaagttcgatagattttgctattttttctcttcatttagctggtgcttctt
ctattatgggggctgttaattttatttctactatcattaatatacgaatattaggaatat
ctatagaaaaggttcctctttttgtttgatcagttttaattacagcagtattattgttac
tttctttgcctgttttagcaggtgctattactatattattaacggatcgaaattttaata
cttctttttttgatcctgctggtgggggggatccaattttatttcaacattta
>SMNKARA08140_Pardosa_palustris_8y87E_48y8N_ad_m_A_Lycosidae
ctttatatttaatatttggggtttggtcagctataatagggactgctataagagtattaa
ttcgaatagaattaggaaatcctgggagattgttaggagatgatcatttatataatgtta
tagttactgctcatgcttttgtaataattttttttatagtaataccaattcttattggag
gttttggtaattgattagttcctttgatattaggagctccggatatatcgtttcctcgaa
taaataatctttctttttgattattacctccttctttatttttattatctatatcttcta
tagtggagataggagttggtgctggatgaactgtttatcctcctttagcatctacagttg
gtcatataggaagttcgatagattttgctattttttctcttcatttagctggtgcttctt
ctattatgggggctgttaattttatttctactatcattaatatacgaatattaggaatat
ctatagaaaaggttcctctttttgtttgatcagttttaattacagcagtattattgttac
tttctttgcctgttttagcaggtgctattactatattattaacggatcgaaattttaata
cttctttttttgatcctgctggtgggggggatccaattttatttcaacattta
>SMNKARA08141_Pardosa_palustris_8y87E_48y8N_ad_m_A_Lycosidae
ctttatatttaatatttggggtttggtcagctataatagggactgctataagagtattaa
ttcgaatagaattaggaaatcctgggagattgttaggagatgatcatttatataatgtta
tagttactgctcatgcttttgtaataattttttttatagtaataccaattcttattggag
gttttggtaattgattagttcctttgatattaggagctccggatatatcgtttcctcgaa
taaataatctttctttttgattattacctccttctttatttttattatctatatcttcta
tagtggagataggagttggtgctggatgaactgtttatcctcctttagcatctacagttg
gtcatataggaagttcaatagattttgctattttttctcttcatttagctggtgcttctt
ctattataggggctgttaattttatttctactatcattaatatacgaatattaggaatat
ctatagaaaaggttcctctttttgtttgatcagttttaattacagcagtattattgttac
tttctttgcctgttttagcaggtgctattactatattattaacggatcgaaattttaata
cctctttttttgaccctgctggtgggggggatccaattttatttcaacattta
>SMNKARA08142_Pardosa_palustris_8y87E_48y8N_ad_m_A_Lycosidae
ctttatatttaatatttggggtttggtcagctataatagggactgctataagagtattaa
ttcgaatagaattaggaaatcctgggagattgttaggagatgatcatttatataatgtta
tagttactgctcatgcttttgtaataattttttttatagtaataccaattcttattggag
gttttggtaattgattagttcctttgatattaggagctccggatatatcgtttcctcgaa
taaataatctttctttttgattattacctccttctttatttttattatctatatcttcta
tagtggagataggagttggtgctggatgaactgtttatcctcctttagcatctacagttg
gtcatataggaagttcgatagattttgctattttttctcttcatttagctggtgcttctt
ctattatgggggctgttaattttatttctactatcattaatatacgaatattaggaatat
ctatagaaaaggttcctctttttgtttgatcagttttaattacagcagtattattgttac
tttctttgcctgttttagcaggtgctattactatattattaacggatcgaaattttaata
cttctttttttgatcctgctggtgggggggatccaattttatttcaacattta
>SMNKARA08143_Pardosa_palustris_8y87E_48y8N_ad_m_A_Lycosidae
ctttatatttaatatttggggtttggtcagctataatagggactgctataagagtattaa
ttcgaatagaattaggaaatcctgggagattgttaggagatgatcatttatataatgtta
tagttactgctcatgcttttgtaataattttttttatagtaataccaattcttattggag
gttttggtaattgattagttcctttgatattaggagctccggatatatcgtttcctcgaa
taaataatctttctttttgattattacctccttctttatttttattatctatatcttcta
tagtggagataggagttggtgctggatgaactgtttatcctcctttagcatctacagttg
gtcatataggaagttcaatagattttgctattttttctcttcatttagctggtgcttctt
ctattataggggctgttaattttatttctactatcattaatatacgaatattaggaatat
ctatagaaaaggttcctctttttgtttgatcagttttaattacagcagtattattgttac
tttctttgcctgttttagcaggtgctattactatattattaacggatcgaaattttaata
cctctttttttgaccctgctggtgggggggatccaattttatttcaacattta
>SMNKARA08144_Pardosa_palustris_8y87E_48y8N_ad_m_A_Lycosidae
ctttatatttaatatttggggtttggtcagctataatagggactgctataagagtattaa
ttcgaatagaattaggaaatcctgggagattgttaggagatgatcatttatataatgtta
tagttactgctcatgcttttgtaataattttttttatagtaataccaattcttattggag
gttttggtaattgattagttcctttgatattaggagctccggatatatcgtttcctcgaa
taaataatctttctttttgattattacctccttctttatttttattatctatatcttcta
tagtggagataggagttggtgctggatgaactgtttatcctcctttagcatctacagttg
gtcatataggaagttcaatagattttgctattttttctcttcatttagctggtgcttctt
ctattataggggctgttaattttatttctactatcattaatatacgaatattaggaatat
ctatagaaaaggttcctctttttgtttgatcagttttaattacagcagtattattgttac
tttctttgcctgttttagcaggtgctattactatattattaacggatcgaaattttaata
cctctttttttgaccctgctggtgggggggatccaattttatttcaacattta
>SMNKARA08145_Pardosa_palustris_8y87E_48y8N_ad_m_A_Lycosidae
ctttatatttaatatttggggtttggtcagctataatagggactgctataagagtattaa
ttcgaatagaattaggaaatcctgggagattgttaggagatgatcatttatataatgtta
tagttactgctcatgcttttgtaataattttttttatagtaataccaattcttattggag
gttttggtaattgattagttcctttgatattaggagctccggatatatcgtttcctcgaa
taaataatctttctttttgattattacctccttctttatttttattatctatatcttcta
tagtggagataggagttggtgctggatgaactgtttatcctcctttagcatctacagttg
gtcatataggaagttcaatagattttgctattttttctcttcatttagctggtgcttctt
ctattataggggctgttaattttatttctactatcattaatatacgaatattaggaatat
ctatagaaaaggttcctctttttgtttgatcagttttaattacagcagtattattgttac
tttctttgcctgttttagcaggtgctattactatattattaacggatcgaaattttaata
cctctttttttgaccctgctggtgggggggatccaattttatttcaacattta
>SMNKARA08147_Pardosa_palustris_8y87E_48y8N_ad_m_A_Lycosidae
ctttatatttaatatttggggtttggtcagctataatagggactgctataagagtattaa
ttcgaatagaattaggaaatcctgggagattgttaggagatgatcatttatataatgtta
tagttactgctcatgcttttgtaataattttttttatagtaataccaattcttattggag
gttttggtaattgattagttcctttgatattaggagctccggatatatcgtttcctcgaa
taaataatctttctttttgattattacctccttctttatttttattatctatatcttcta
tagtggagataggagttggtgctggatgaactgtttatcctcctttagcatctacagttg
gtcatataggaagttcgatagattttgctattttttctcttcatttagctggtgcttctt
ctattatgggggctgttaattttatttctactatcattaatatacgaatattaggaatat
ctatagaaaaggttcctctttttgtttgatcagttttaattacagcagtattattgttac
tttctttgcctgttttagcaggtgctattactatattattaacggatcgaaattttaata
cttctttttttgatcctgctggtgggggggatccaattttatttcaacaatta
>SMNKARA08148_Pardosa_palustris_8y87E_48y8N_ad_m_A_Lycosidae
ctttatatttaatatttggggtttggtcagctataatagggactgctataagagtattaa
ttcgaatagaattaggaaatcctgggagattgttaggagatgatcatttatataatgtta
tagttactgctcatgcttttgtaataattttttttatagtaataccaattcttattggag
gttttggtaattgattagttcctttgatattaggagctccggatatatcgtttcctcgaa
taaataatctttctttttgattattacctccttctttatttttattatctatatcttcta
tagtggagataggagttggtgctggatgaactgtttatcctcctttagcatctacagttg
gtcatataggaagttcaatagattttgctattttttctcttcatttagctggtgcttctt
ctattataggggctgttaattttatttctactatcattaatatacgaatattaggaatat
ctatagaaaaggttcctctttttgtttgatcagttttaattacagcagtattattgttac
tttctttgcctgttttagcaggtgctattactatattattaacggatcgaaattttaata
cctctttttttgaccctgctggtgggggggatccaattttatttcaacattta
>SMNKARA08150_Pardosa_palustris_8y87E_48y8N_ad_m_A_Lycosidae
ctttatatttaatatttggggtttggtcagctataatagggactgctataagagtattaa
ttcgaatagaattaggaaatcctgggagattgttaggagatgatcatttatataatgtta
tagttactgctcatgcttttgtaataattttttttatagtaataccaattcttattggag
gttttggtaattgattagttcctttgatattaggagctccggatatatcgtttcctcgaa
taaataatctttctttttgattattacctccttctttatttttattatctatatcttcta
tagtggagataggagttggtgctggatgaactgtttatcctcctttagcatctacagttg
gtcatataggaagttcaatagattttgctattttttctcttcatttagctggtgcttctt
ctattataggggctgttaattttatttctactatcattaatatacgaatattaggaatat
ctatagaaaaggttcctctttttgtttgatcagttttaattacagcagtattattgttac
tttctttgcctgttttagcaggtgctattactatattattaacggatcgaaattttaata
cctctttttttgaccctgctggtgggggggatccaattttatttcaacattta
>SMNKARA08151_Pardosa_palustris_8y87E_48y8N_ad_m_A_Lycosidae
ctttatatttaatatttggggtttggtcagctataatagggactgctataagagtattaa
ttcgaatagaattaggaaatcctgggagattgttaggagatgatcatttatataatgtta
tagttactgctcatgcttttgtaataattttttttatagtaataccaattcttattggag
gttttggtaattgattagttcctttgatattaggagctccggatatatcgtttcctcgaa
taaataatctttctttttgattattacctccttctttatttttattatctatatcttcta
tagtggagataggagttggtgctggatgaactgtttatcctcctttagcatctacagttg
gtcatataggaagttcgatagattttgctattttttctcttcatttagctggtgcttctt
ctattatgggggctgttaattttatttctactatcattaatatacgaatattaggaatat
ctatagaaaaggttcctctttttgtttgatcagttttaattacagcagtattattgttac
tttctttgcctgttttagcaggtgctattactatattattaacggatcgaaattttaata
cttctttttttgatcctgctggtgggggggatccaattttatttcaacattta
>SMNKARA08152_Pardosa_palustris_8y87E_48y8N_ad_m_A_Lycosidae
ctttatatttaatatttggggtttggtcagctataatagggactgctataagagtattaa
ttcgaatagaattaggaaatcctgggagattgttaggagatgatcatttatataatgtta
tagttactgctcatgcttttgtaataattttttttatagtaataccaattcttattggag
gttttggtaattgattagttcctttgatattaggagctccggatatatcgtttcctcgaa
taaataatctttctttttgattattacctccttctttatttttattatctatatcttcta
tagtggagataggagttggtgctggatgaactgtttatcctcctttagcatctacagttg
gtcatataggaagttcgatagattttgctattttttctcttcatttagctggtgcttctt
ctattatgggggctgttaattttatttctactatcattaatatacgaatattaggaatat
ctatagaaaaggttcctctttttgtttgatcagttttaattacagcagtattattgttac
tttctttgcctgttttagcaggtgctattactatattattaacggatcgaaattttaata
cttctttttttgatcctgctggtgggggggatccaattttatttcaacattta
>SMNKARA08153_Pardosa_palustris_8y87E_48y8N_ad_m_A_Lycosidae
ctttatatttaatatttggggtttggtcagctataatagggactgctataagagtattaa
ttcgaatagaattaggaaatcctgggagattgttaggagatgatcatttatataatgtta
tagttactgctcatgcttttgtaataattttttttatagtaataccaattcttattggag
gttttggtaattgattagttcctttgatattaggagctccggatatatcgtttcctcgaa
taaataatctttctttttgattattacctccttctttatttttattatctatatcttcta
tagtggagataggagttggtgctggatgaactgtttatcctcctttagcatctacagttg
gtcatataggaagttcgatagattttgctattttttctcttcatttagctggtgcttctt
ctattatgggggctgttaattttatttctactatcattaatatacgaatattaggaatat
ctatagaaaaggttcctctttttgtttgatcagttttaattacagcagtattattgttac
tttctttgcctgttttagcaggtgctattactatattattaacggatcgaaattttaata
cttctttttttgatcctgctggtgggggggatccaattttatttcaacattta
>SMNKARA08154_Pardosa_lugubris_8y87E_48y8N_ad_f_A_Lycosidae
ctttatatttaatatttggagtttgatcggctataatagggactgctataagagtattaa
ttcgaatagaattaggaaatcctgggagattattaggtgatgatcatttatataatgtta
tagttactgctcatgcttttgtaataattttttttatagtaataccaattcttattggag
gttttgggaattgattaattcctttaatattaggagctccagatatatcatttcctcgaa
taaataatctttctttttgattattacctccttctttatttttattatctatatcttcta
tagtggagataggagttggtgctggatgaactgtttatcctcctttagcatctacggttg
gtcatataggaagttcaatagattttgctattttttctcttcatttggctggagcctctt
ctattataggggctgtaaattttatttctactattataaatatacggataataggaatat
ctttagaaaaagttcctctttttgtttgatcagttttaattacagcagtattattattac
tttctttacctgttttagcaggtgctattactatattattaacagatcgaaattttaata
cttctttttttgatcctgctggtggaggagatcctattttatttcaacattta
>SMNKARA08155_Pardosa_lugubris_8y87E_48y8N_ad_f_A_Lycosidae
ctttatatttaatatttggagtttgatcggctataatagggactgctataagagtattaa
ttcgaatagaattaggaaatcctgggagattattaggtgatgatcatttatataatgtta
tagttactgctcatgcttttgtaataattttttttatagtaataccaattcttattggag
gttttgggaattgattaattcctttaatattaggagctccagatatatcatttcctcgaa
taaataatctttctttttgattattacctccttctttatttttattatctatatcttcta
tagtggagataggagttggtgctggatgaactgtttatcctcctttagcatctacggttg
gtcatataggaagttcaatagattttgctattttttctcttcatttggctggagcctctt
ctattataggggctgtaaattttatttctactattataaatatacggataataggaatat
ctttagaaaaagttcctctttttgtttgatcagttttaattacagcagtattattattac
tttctttacctgttttagcaggtgctattactatattattaacagatcgaaattttaata
cttctttttttgatcctgctggtggaggagatcctattttatttcaacattta
>SMNKARA08156_Pardosa_lugubris_8y87E_48y8N_ad_f_A_Lycosidae
ctttatatttaatatttggagtttgatcggctataatagggactgctataagagtattaa
ttcgaatagaattagggaatcctgggagattattaggtgatgatcatttatataatgtta
tagttactgctcatgcttttgtaataattttttttatagtaataccaattcttattggag
gttttgggaattgattaattcctttaatattaggagctccagatatatcatttcctcgaa
taaataatctttctttttgattattacctccttctttatttttattatctatatcttcta
tagtggagataggagttggtgctggatgaactgtttatcctcctttagcatctacggttg
gtcatataggaagttcaatagattttgctattttttctcttcatttggctggagcttctt
ctattataggggctgtaaattttatttctactattataaatatacggataataggaatat
ctttagaaaaggttcctctttttgtttgatcagttttaattacagcagtattattattac
tttctttacctgttttagcaggtgctattactatattattaacagatcgaaattttaata
cttctttttttgatcctgctggtggaggagatcctattttatttcaacattta
>SMNKARA08157_Pardosa_lugubris_8y87E_48y8N_ad_f_A_Lycosidae
ctttatatttaatatttggagtttgatcggctataatagggactgctataagagtattaa
ttcgaatagaattaggaaatcctgggagattattaggtgatgatcatttatataatgtta
tagttactgctcatgcttttgtaataattttttttatagtaataccaattcttattggag
gttttgggaattgattaattcctttaatattaggagctccagatatatcatttcctcgaa
taaataatctttctttttgattattacctccttctttatttttattatctatatcttcta
tagtggagataggagttggtgctggatgaactgtttatcctcctttagcatctacggttg
gtcatataggaagttcaatagattttgctattttttctcttcatttggctggagcctctt
ctattataggggctgtaaattttatttctactattataaatatacggataataggaatat
ctttagaaaaagttcctctttttgtttgatcagttttaattacagcagtattattattac
tttctttacctgttttagcaggtgctattactatattattaacagatcgaaattttaata
cttctttttttgatcctgctggtggaggagatcctattttatttcaacattta
>SMNKARA08158_Pardosa_lugubris_8y87E_48y8N_ad_f_A_Lycosidae
ctttatatttaatatttggagtttgatcggctataatagggactgctataagagtattaa
ttcgaatagaattaggaaatcctgggagattattaggtgatgatcatttatataatgtta
tagttactgctcatgcttttgtaataattttttttatagtaataccaattcttattggag
gttttgggaattgattaattcctttaatattaggagctccagatatatcatttcctcgaa
taaataatctttctttttgattattacctccttctttatttttattatctatatcttcta
tagtggagataggagttggtgctggatgaactgtttatcctcctttagcatctacggttg
gtcatataggaagttcaatagattttgctattttttctcttcatttggctggagcctctt
ctattataggggctgtaaattttatttctactattataaatatacggataataggaatat
ctttagaaaaagttcctctttttgtttgatcagttttaattacagcagtattattattac
tttctttacctgttttagcaggtgctattactatattattaacagatcgaaattttaata
cttctttttttgatcctgctggtggaggagatcctattttatttcaacattta
>SMNKARA08159_Pardosa_lugubris_8y87E_48y8N_ad_f_A_Lycosidae
ctttatatttaatatttggagtttgatcggctataatagggactgctataagagtattaa
ttcgaatagaattaggaaatcctgggagattattaggtgatgatcatttatataatgtta
tagttactgctcatgcttttgtaataattttttttatagtaataccaattcttattggag
gttttgggaattgattaattcctttaatattaggagctccagatatatcatttcctcgaa
taaataatctttctttttgattattacctccttctttatttttattatctatatcttcta
tagtggagataggagttggtgctggatgaactgtttatcctcctttagcatctacggttg
gtcatataggaagttcaatagattttgctattttttctcttcatttggctggagcctctt
ctattataggggctgtaaattttatttctactattataaatatacggataataggaatat
ctttagaaaaagttcctctttttgtttgatcagttttaattacagcagtattattattac
tttctttacctgttttagcaggtgctattactatattattaacagatcgaaattttaata
cttctttttttgatcctgctggtggaggagatcctattttatttcaacattta
>SMNKARA08160_Pardosa_lugubris_8y87E_48y8N_ad_f_A_Lycosidae
ctttatatttaatatttggagtttgatcggctataatagggactgctataagagtattaa
ttcgaatagaattaggaaatcctgggagattattaggtgatgatcatttatataatgtta
tagttactgctcatgcttttgtaataattttttttatagtaataccaattcttattggag
gttttgggaattgattaattcctttaatattaggagctccagatatatcatttcctcgaa
taaataatctttctttttgattattacctccttctttatttttattatctatatcttcta
tagtggagataggagttggtgctggatgaactgtttatcctcctttagcatctacggttg
gtcatataggaagttcaatagattttgctattttttctcttcatttggctggagcctctt
ctattataggggctgtaaattttatttctactattataaatatacggataataggaatat
ctttagaaaaagttcctctttttgtttgatcagttttaattacagcagtattattattac
tttctttacctgttttagcaggtgctattactatattattaacagatcgaaattttaata
cttctttttttgatcctgctggtggaggagatcctattttatttcaacattta
>SMNKARA08161_Pardosa_lugubris_8y87E_48y8N_ad_f_A_Lycosidae
ctttatatttaatatttggagtttgatcggctataatagggactgctataagagtattaa
ttcgaatagaattagggaatcctgggagattattaggtgatgatcatttatataatgtta
tagttactgctcatgcttttgtaataattttttttatagtaataccaattcttattggag
gttttgggaattgattaattcctttaatattaggagctccagatatatcatttcctcgaa
taaataatctttctttttgattattacctccttctttatttttattatctatatcttcta
tagtggagataggagttggtgctggatgaactgtttatcctcctttagcatctacggttg
gtcatataggaagttcaatagattttgctattttttctcttcatttggctggagcttctt
ctattataggggctgtaaattttatttctactattataaatatacggataataggaatat
ctttagaaaaggttcctctttttgtttgatcagttttaattacagcagtattattattac
tttctttacctgttttagcaggtgctattactatattattaacagatcgaaattttaata
cttctttttttgatcctgctggtggaggagatcctattttatttcaacattta
>SMNKARA08162_Pardosa_lugubris_8y87E_48y8N_ad_f_A_Lycosidae
ctttatatttaatatttggagtttgatcggctataatagggactgctataagagtattaa
ttcgaatagaattaggaaatcctgggagattattaggtgatgatcatttatataatgtta
tagttactgctcatgcttttgtaataattttttttatagtaataccaattcttattggag
gttttgggaattgattaattcctttaatattaggagctccagatatatcatttcctcgaa
taaataatctttctttttgattattacctccttctttatttttattatctatatcttcta
tagtggagataggagttggtgctggatgaactgtttatcctcctttagcatctacggttg
gtcatataggaagttcaatagattttgctattttttctcttcatttggctggagcctctt
ctattataggggctgtaaattttatttctactattataaatatacggataataggaatat
ctttagaaaaagttcctctttttgtttgatcagttttaattacagcagtattattattac
tttctttacctgttttagcaggtgctattactatattattaacagatcgaaattttaata
cttctttttttgatcctgctggtggaggagatcctattttatttcaacattta
>SMNKARA08163_Pardosa_lugubris_8y87E_48y8N_ad_f_A_Lycosidae
ctttatatttaatatttggagtttgatcggctataatagggactgctataagagtattaa
ttcgaatagaattaggaaatcctgggagattattaggtgatgatcatttatataatgtta
tagttactgctcatgcttttgtaataattttttttatagtaataccaattcttattggag
gttttgggaattgattaattcctttaatattaggagctccagatatatcatttcctcgaa
taaataatctttctttttgattattacctccttctttatttttattatctatatcttcta
tagtggagataggagttggtgctggatgaactgtttatcctcctttagcatctacggttg
gtcatataggaagttcaatagattttgctattttttctcttcatttggctggagcctctt
ctattataggggctgtaaattttatttctactattataaatatacggataataggaatat
ctttagaaaaagttcctctttttgtttgatcagttttaattacagcagtattattattac
tttctttacctgttttagcaggtgctattactatattattaacagatcgaaattttaata
cttctttttttgatcctgctggtggaggagatcctattttatttcaacattta
>SMNKARA08164_Pardosa_lugubris_8y87E_48y8N_ad_f_A_Lycosidae
ctttatatttaatatttggagtttgatcggctataatagggactgctataagagtattaa
ttcgaatagaattaggaaatcctgggagattattaggtgatgatcatttatataatgtta
tagttactgctcatgcttttgtaataattttttttatagtaataccaattcttattggag
gttttgggaattgattaattcctttaatattaggagctccagatatatcatttcctcgaa
taaataatctttctttttgattattacctccttctttatttttattatctatatcttcta
tagtggagataggagttggtgctggatgaactgtttatcctcctttagcatctacggttg
gtcatataggaagttcaatagattttgctattttttctcttcatttggctggagcctctt
ctattataggggctgtaaattttatttctactattataaatatacggataataggaatat
ctttagaaaaagttcctctttttgtttgatcagttttaattacagcagtattattattac
tttctttacctgttttagcaggtgctattactatattattaacagatcgaaattttaata
cttctttttttgatcctgctggtggaggagatcctattttatttcaacattta
>SMNKARA08165_Pardosa_lugubris_8y87E_48y8N_ad_f_A_Lycosidae
ctttatatttaatatttggagtttgatcggctataatagggactgctataagagtattaa
ttcgaatagaattaggaaatcctgggagattattaggtgatgatcatttatataatgtta
tagttactgctcatgcttttgtaataattttttttatagtaataccaattcttattggag
gttttgggaattgattaattcctttaatattaggagctccagatatatcatttcctcgaa
taaataatctttctttttgattattacctccttctttatttttattatctatatcttcta
tagtggagataggagttggtgctggatgaactgtttatcctcctttagcatctacggttg
gtcatataggaagttcaatagattttgctattttttctcttcatttggctggagcctctt
ctattataggggctgtaaattttatttctactattataaatatacggataataggaatat
ctttagaaaaagttcctctttttgtttgatcagttttaattacagcagtattattattac
tttctttacctgttttagcgggtgctattactatattattaacagatcgaaattttaata
cttctttttttgatcctgctggtggaggagatcctattttatttcaacattta
>SMNKARA08166_Pardosa_lugubris_8y87E_48y8N_ad_m_A_Lycosidae
ctttatatttaatatttggagtttgatcggctataatagggactgctataagagtattaa
ttcgaatagaattaggaaatcctgggagattattaggtgatgatcatttatataatgtta
tagttactgctcatgcttttgtaataattttttttatagtaataccaattcttattggag
gttttgggaattgattaattcctttaatattaggagctccagatatatcatttcctcgaa
taaataatctttctttttgattattacctccttctttatttttattatctatatcttcta
tagtggagataggagttggtgctggatgaactgtttatcctcctttagcatctacggttg
gtcatataggaagttcaatagattttgctattttttctcttcatttggctggagcctctt
ctattataggggctgtaaattttatttctactattataaatatacggataataggaatat
ctttagaaaaagttcctctttttgtttgatcagttttaattacagcagtattattattac
tttctttacctgttttagcaggtgctattactatattattaacagatcgaaattttaata
cttctttttttgatcctgctggtggaggagatcctattttatttcaacattta
>SMNKARA08167_Pardosa_lugubris_8y87E_48y8N_ad_m_A_Lycosidae
ctttatatttaatatttggagtttgatcggctataatagggactgctataagagtattaa
ttcgaatagaattaggaaatcctgggagattattaggtgatgatcatttatataatgtta
tagttactgctcatgcttttgtaataattttttttatagtaataccaattcttattggag
gttttgggaattgattaattcctttaatattaggagctccagatatatcatttcctcgaa
taaataatctttctttttgattattacctccttctttatttttattatctatatcttcta
tagtggagataggagttggtgctggatgaactgtttatcctcctttagcatctacggttg
gtcatataggaagttcaatagattttgctattttttctcttcatttggctggagcctctt
ctattataggggctgtaaattttatttctactattataaatatacggataatagaaatat
ctttagaaaaagttcctctttttgtttgatcagttttaattacagcagtattattattac
tttctttacctgttttagcaggtgctattactatattattaacagatcgaaattttaata
cttctttttttgatcctgctggtggaggagatcctattttatttcaacattta
>SMNKARA08168_Pardosa_lugubris_8y87E_48y8N_ad_m_A_Lycosidae
ctttatatttaatatttggagtttgatcggctataatagggactgctataagagtattaa
ttcgaatagaattaggaaatcctgggagattattaggtgatgatcatttatataatgtta
tagttactgctcatgcttttgtaataattttttttatagtaataccaattcttattggag
gttttgggaattgattaattcctttaatattaggagctccagatatatcatttcctcgaa
taaataatctttctttttgattattacctccttctttatttttattatctatatcttcta
tagtggagataggagttggtgctggatgaactgtttatcctcctttagcatctacggttg
gtcatataggaagttcaatagattttgctattttttctcttcatttggctggagcctctt
ctattataggggctgtaaattttatttctactattataaatatacggataataggaatat
ctttagaaaaagttcctctttttgtttgatcagttttaattacagcagtattattattac
tttctttacctgttttagcaggtgctattactatattattaacagatcgaaattttaata
cttctttttttgatcctgctggtggaggagatcctattttatttcaacattta
>SMNKARA08169_Pardosa_pullata_8y87E_48y8N_ad_m_A_Lycosidae
ctttatatttaatgtttggagtttgatcagctataataggaactgctataagagtgttaa
ttcgaatagaattaggaaatcctggaagattgttaggtgatgatcatttatataatgtta
tagttactgctcatgcttttgtaataattttttttatagtaataccaattcttattggag
gttttggaaattgattagttccattaatattaggagctccagatatatcatttcctcgaa
taaataatctttctttttgattattacctccttctttatttttattatctatatcttcta
tagtagaaataggggttggtgctgggtgaactgtttatcctcctttagcatctacagttg
gtcatataggaaattcaatggattttgctattttttctcttcatttggctggggcttctt
ctattataggggctgtgaattttatttctactattattaatatacgaatattggggatat
cttttgaaaaggttcctctttttgtttgatcagttttaattacagcggtattgttattac
tttctttacctgttttagcaggtgctattactatattattaacggatcgaaattttaata
cttctttttttgaccctgctggtggaggggatcctattttatttcaacattta
>SMNKARA08170_Pardosa_pullata_8y87E_48y8N_ad_f_A_Lycosidae
ctttatatttaatgtttggagtttgatcagctataataggaactgctataagagtgttaa
ttcgaatagaattaggaaatcctggaagattgttaggtgatgatcatttatataatgtta
tagttactgctcatgcttttgtaataattttttttatagtaataccaattcttattggag
gttttggaaattgattagttccattaatattaggagctccagatatatcatttcctcgaa
taaataatctttctttttgattattgcctccttctttatttttattatctatatcttcta
tagtagaaataggggttggtgctgggtgaactgtttatcctcctttagcatctacagttg
gtcatataggaaattcaatggattttgctattttttctcttcatttggctggggcttctt
ctattataggggctgtgaattttatttctactattattaatatacgaatattgggaatat
cttttgaaaaggttcctctttttgtttgatcagttttaattacagcggtattgttattac
tttctttacctgttttagcaggtgctattactatattattaacggatcgaaattttaata
cttctttttttgaccctgctggtggaggggatcctattttatttcaacattta
>SMNKARA08171_Pardosa_hortensis_8y87E_48y8N_ad_f_A_Lycosidae
ctttatatttaatatttggagtttgatcggctataataggtactgctataagagtattaa
ttcgaatagaattaggaaatcccgggagattattaggtgatgatcatttatataatgtta
tggttactgctcatgcttttgtaatgattttttttatagtaataccaattcttattggag
grtttgggaattgattagttcctttaatattaggtgctccagatatatcatttcctcgaa
taaataatctttctttttgattattacctccttctttgtttttattgtctatatcttcta
tagtagaaataggagttggtgctggatgaactgtttatcctcctttagcatctacggttg
gtcatataggaagttcaatagattttgctattttttctcttcatttggctggggcttctt
ctattataggtgctgtaaattttatttctactattattaatatacggatattaggaatat
ctatagagaaagttcctctttttgtttgatcagtattaattacggcggtattattattgc
tttctttaccggttttagcaggtgctattactatactattgacagatcgtaattttaata
cttctttttttgatcctgctggaggtggtgatcctattttatttcaacatttg
>SMNKARA08172_Pardosa_hortensis_8y87E_48y8N_ad_f_A_Lycosidae
ctttgtatttaatatttggagtttgatcggctataataggaactgctataagagtattaa
ttcggatagagttgggaaatcctggaagattattaggtgatgatcatttatataatgtta
tggttactgctcatgcttttgtaatgattttttttatagtgataccaattcttattggag
gatttggaaattgattggttcctttaatattaggtgctccagatatatcgtttcctcgga
taaataatctttctttttgattattacctccttctttgtttttattatctatatcttcta
tagtagagataggagttggtgctggatgaactgtttatcctcctttagcgtctacggttg
gtcatataggaagttcaatagattttgctattttttctcttcatttagctggggcttctt
ctattataggtgctgtaaattttatttctactattattaatatacgaatattaggaatat
ctatagagaaagttcctctttttgtttggtcagtattaattactgcagtattattgttgc
tttctttaccggttttagcgggtgctattactatattattaacagatcgtaattttaata
cttctttttttgatcctgctgggggtggtgatcctattttatttcaacattta
>SMNKARA08174_Pardosa_hortensis_8y58E_48y89N_ad_f_A_Lycosidae
ctttgtatttaatatttggagtttgatcggctataataggaactgctataagagtattaa
ttcggatagagttaggaaatcctggaagattattaggtgatgatcatttatataatgtta
tggttactgctcatgcttttgtaatgattttttttatagtgataccaattcttattggag
gatttggaaattgattggttcctttaatattgggtgctccagatatatcgtttcctcgga
taaataatctttctttttgattattacctccttctttgtttttattatctatatcctcta
tagtggagataggagttggtgctggatgaactgtttatcctcctttagcgtctacggttg
gtcatataggaagttcaatagattttgctattttttctcttcatttagctggggcttctt
ctattataggtgctgtaaattttatttctactattattaatatacgaatattaggtatat
ctatagagaaagttcctctttttgtttggtcagtattaattactgcagtattattgttgc
tttctttaccggttttagcgggtgctattactatattattaacagatcgtaattttaata
cttctttttttgatcctgctgggggtggtgatcctattttatttcaacattta
>SMNKARA08175_Pardosa_hortensis_8y58E_48y89N_ad_f_A_Lycosidae
ctttgtatttaatatttggagtttgatcggctataataggaactgctataagagtattaa
ttcggatagagttaggaaatcctggaagattattaggtgatgatcatttatataatgtta
tggttactgctcatgcttttgtaatgattttttttatagtgataccaattcttattggag
gatttggaaattgattggtacctttaatattaggtgctccagatatgtcgtttcctcgga
taaataatctttctttttgattattacctccttctttgtttttattatctatatcttcta
tagtagagataggagttggtgctggatgaactgtttatcctcctttagcgtccacggttg
gtcatataggaagttcaatagattttgctattttttctcttcatttagctggggcttctt
ctattataggtgctgtaaattttatttctactattattaatatacgaatattaggtatat
ctatagagaaagttcctctttttgtttggtcagtattaattactgcagtattattgttgc
tttctttaccggttttagcgggtgctattactatattattaacagatcgtaattttaata
cttctttttttgatcctgctggaggtggtgatcctattttatttcaacattta
>SMNKARA08176_Pardosa_pullata_8y58E_48y89N_ad_f_A_Lycosidae
ctttatatttaatgtttggagtttgatcagctataataggaactgctataagagtgttaa
ttcgaatagaattaggaaatcctggaagattgttaggtgatgatcatttatataatgtta
tagttactgctcatgcttttgtaataattttttttatagtaataccaattcttattggag
gttttggaaattgattagttccattaatattaggagctccagatatatcatttcctcgaa
taaataatctttctttttgattattacctccttctttatttttattatctatatcttcta
tagtagaaataggggttggtgctgggtgaactgtttatcctcctttagcatctacagttg
gtcatataggaaattcaatggattttgctattttttctcttcatttggctggggcttctt
ctattataggggctgtgaattttatttctactattattaatatacgaatattggggatat
cttttgaaaaggttcctctttttgtttgatcagttttaattacagcggtattattattac
tttctttacctgttttagcaggtgctattactatattattaacggatcgaaattttaata
cttctttttttgaccctgctggtggaggggatcctattttatttcaacattta
>SMNKARA08177_Pardosa_prativaga_8y58E_48y89N_ad_f_A_Lycosidae
ctttatatttaatgtttggagtttgatcagctataataggaactgctataagagtgttaa
ttcgaatagaattaggaaatcctggaagattattaggtgatgatcatttgtataatgtta
tagttactgctcatgcttttgtaataattttttttatagtaataccaattcttattggag
gttttgggaattgattggttcctttaatattaggagctccagatatatcatttcctcgaa
taaataatctttctttttgattattacctccttctttatttttattatctatatcttcta
tagtagaaataggggttggtgctgggtgaactgtttatcctcctttagcatctacagttg
gtcatataggaaattcaatagattttgctattttttctcttcatttggctggggcttctt
ctattataggggctgtgaattttatttctactattattaatatacgaatattaggtatat
cttttgaaaaggttcctctttttgtttgatcagttttaattacagcagtattattattac
tttctttacctgttttagcaggtgctattactatattattaacagatcgaaattttaata
cttctttttttgatcctgctggtggaggggatcctattttatttcaacattta
>SMNKARA08178_Pardosa_pullata_8y58E_48y89N_ad_f_A_Lycosidae
ctttatatttactgtttggagtttgatcagctataataggaactgctataagagtgttaa
ttcgaatagaattaggaaatcctggaagattgttaggtgatgatcatttatataatgtta
tagttactgctcatgcttttgtaataattttttttatagtaataccaattcttattggag
gttttggaaattgattagttccattaatattaggagctccagatatatcatttcctcgaa
taaataatctttctttttgattattacctccttctttatttttattatctatatcttcta
tagtagaaataggggttggtgctgggtgaactgtttatcctcctttagcatctacagttg
gtcatataggaaattcaatggattttgctattttttctcttcatttggctggggcttctt
ctattataggggctgtgaattttatttctactattattaatatacgaatattgggaatat
cttttgaaaaggttcctctttttgtttgatcagttttaattacagcggtattgttattac
tttctttacctgttttagcaggtgctattactatattattaacggatcggaattttaata
cttctttttttgaccctgctggtggaggggatcctattttatttcaacattta
>SMNKARA08179_Pardosa_pullata_8y58E_48y89N_ad_f_A_Lycosidae
ctttatatttaatgtttggagtttgatcagctataataggaactgctataagagtgttaa
ttcgaatagaattaggaaatcctggaagattgttaggtgatgatcatttatataatgtta
tagttactgctcatgcttttgtaataattttttttatagtaataccaattcttattggag
gttttggaaattgattagttccattaatattaggagctccagatatatcatttcctcgga
taaataatctttctttttgattattacctccttctttatttttattatctatatcttcta
tagtagaaataggggttggtgctgggtgaactgtttaccctcctttagcatctacagttg
gtcatataggaaattcaatggattttgctattttttctcttcatttggctggggcttctt
ctattataggggctgtgaattttatttctactattattaatatacgaatattgggaatat
cttttgaaaaggttcctctttttgtttgatcagttttaattacagcggtattactattac
tttctttacctgttttagcaggtgctattactatattattaacggatcgaaattttaata
cttctttttttgaccctgctggtggaggggatcctattttatttcaacattta
>SMNKARA08182_Pardosa_pullata_8y58E_48y89N_ad_f_A_Lycosidae
ctttatatttaatgtttggagtttgatcagctataataggaactgctataagagtgttaa
ttcgaatagaattaggaaatcctggaagattgttaggtgatgatcatttatataatgtta
tagttactgctcatgcttttgtaataattttttttatagtaataccaattcttattggag
gttttggaaattgattagttccattaatattaggagctccagatatatcatttcctcgaa
taaataatctttctttttgattattacctccttctttatttttattatctatatcttcta
tagtagaaataggggttggtgctgggtgaactgtttatcctcctttagcatctacagttg
gtcatataggaaattcaatggattttgctattttttctcttcatttggctggggcttctt
ctattataggggctgtgaattttatttctactattattaatatacgaatattagggatat
cttttgaaaaggttcctctttttgtttgatcagttttaattacagcggtattgttattac
tttctttacctgttttagcaggtgctattactatattattaacggatcgaaattttaata
cttctttttttgatcctgctggtggaggggatcctattttatttcaacattta
>SMNKARA08183_Pardosa_pullata_8y58E_48y89N_ad_f_A_Lycosidae
ctttatatttaatgtttggagtttgatcagctataataggaactgctataagagtgttaa
ttcgaatagaattaggaaatcctggaagattgttaggtgatgatcatttatataatgtta
tagttactgctcatgcttttgtaataattttttttatagtaataccaattcttattggag
gttttggaaattgattagttccattaatattaggagctccagatatatcatttcctcgaa
taaataatctttctttttgattattacctccttctttatttttattatctatatcttcta
tagtagaaataggggttggtgctgggtgaactgtttatcctcctttagcatctacagttg
gtcatataggaaattcaatggattttgctattttttctcttcatttggctggggcttctt
ctattataggggctgtgaattttatttctactattattaatatacgaatattgggaatat
cttttgaaaaggttcctctttttgtttgatcagttttaattacagcggtattgttattac
tttctttacctgttttagcaggtgctattactatattattaacggatcgaaattttaata
cttctttttttgaccctgctggtggaggggatcctattttatttcaacattta
>SMNKARA08184_Pardosa_pullata_8y58E_48y89N_ad_f_A_Lycosidae
ctttatatttaatgtttggagtttgatcagctataataggaactgctataagagtgttaa
ttcgaatagaattaggaaatcctggaagattgttaggtgatgatcatttatataatgtta
tagttactgctcatgcttttgtaataattttttttatagtaataccaattcttattggag
gttttggaaattgattagttccattaatattaggagctccagatatatcatttcctcgaa
taaataatctttctttttgattattacctccttctttatttttattatctatatcttcta
tagtagaaataggggttggtgctgggtgaactgtttatcctcctttagcatctacagttg
gtcatataggaaattcaatggattttgctattttttctcttcatttggctggggcttctt
ctattataggggctgtgaattttatttctactattattaatatacgaatattgggaatat
cttttgaaaaggttcctctttttgtttgatcggttttaattacagcggtattgttattac
tttctttacctgttttagcaggtgctattactatattattaacggatcgaaattttaata
cttctttttttgaccctgccggtggaggggatcctattttatttcaacattta
>SMNKARA08185_Pardosa_pullata_8y58E_48y89N_ad_f_A_Lycosidae
ctttatatttaatgtttggagtttgatcagctataataggaactgctataagagtgttaa
ttcgaatagaattaggaaatcctggaagattgttaggtgatgatcatttatataatgtta
tagttactgctcatgcttttgtaataattttttttatagtaataccaattcttattggag
gttttggaaattgattagttccattaatattaggagctccagatatatcatttcctcgaa
taaataatctttctttttgattattacctccttctttatttttattatctatatcttcta
tagtagaaataggggttggtgctgggtgaactgtttatcctcctttagcatctacagttg
gtcatataggaaattcaatggattttgctattttttctcttcatttggctggggcttctt
ctattataggggctgtgaattttatttctactattattaatatacgaatattgggaatat
cttttgaaaaggttcctctttttgtttgatcagttttaattacagcggtattgttattac
tttctttacctgttttagcaggtgctattactatattattaacggatcgaaattttaata
cttctttttttgaccctgctggtggaggggatcctattttatttcaacattta
>SMNKARA08186_Pardosa_pullata_8y58E_48y89N_ad_f_A_Lycosidae
ctttatatttaatgtttggagtttgatcagctataataggaactgctataagagtgttaa
ttcgaatagaattaggaaatcctggaagattgttaggtgatgatcatttatataatgtta
tagttactgctcatgcttttgtaataattttttttatagtaataccaattcttattggag
gttttggaaattgattagttccattaatattaggagctccagatatatcatttcctcgaa
taaataatctttctttttgattattacctccttctttatttttattatctatatcttcta
tagtagaaataggggttggtgctgggtgaactgtttatcctcctttagcatctacagttg
gtcatataggaaattcaatggattttgctattttttctcttcatttggctggggcttctt
ctattataggggctgtgaattttatttctactattattaatatacgaatattgggaatat
cttttgaaaaggttcctctttttgtttgatcagttttaattacagcggtattgttattac
tttctttacctgttttagcaggtgctattactatattattaacggatcgaaattttaata
cttctttttttgaccctgctggtggaggggatcctattttatttcaacattta
>SMNKARA08187_Pardosa_palustris_8y58E_48y89N_ad_f_A_Lycosidae
ctttatatttaatatttggggtttggtcagctataatagggactgctataagagtattaa
ttcgaatagaattaggaaatcctgggagattgttaggagatgatcatttatataatgtta
tagttactgctcatgcttttgtaataattttttttatagtaataccaattcttattggag
gttttggtaattgattagttcctttgatattaggagctccggatatatcgtttcctcgaa
taaataatctttctttttgattattacctccttctttatttttattatctatatcttcta
tagtggagataggagttggtgctggatgaactgtttatcctcctttagcatctacagttg
gtcatataggaagttcgatagattttgctattttttctcttcatttagctggtgcttctt
ctattatgggggctgttaattttatttctactatcattaatatacgaatattaggaatat
ctatagaaaaggttcctctttttgtttgatcagttttaattacagcagtattattgttac
tttctttgcctgttttagcaggtgctattactatattattaacggatcgaaattttaata
cttctttttttgatcctgctggtgggggggatccaattttatttcaacattta
>SMNKARA08188_Aulonia_albimana_8y58E_48y89N_ad_f_A_Lycosidae
ctttgtatttaatatttggtatttgatcggctatggtaggtacggctataagagtattga
ttcgaatggagttaggtcattctggaagtttattgggagatgatcatttgtataatgttg
tagttactgctcatgcatttgttatgattttttttatagttatacctattttgattggag
gttttggaaattggttggttcctttaatattaggggctcctgatatatcatttcctcgta
taaataatctttctttttgattattacctccttctttgtttttattattaatgtcttctt
tggttgagataggggttggggcaggttgaactgtttatcctcctttggcttctagagttg
ggcatataggaagatctatggattttgctattttttctcttcatttggctggtgcttctt
ctattatgggagctgtaaattttatttctacaattattaatatacgggtagttggaatat
ctatagataaggttcctttgtttgtttgatctgtttttgttactgctgttttattgcttt
tgtctctacctgttttagcgggtgctattactatgttattgactgatcgaaattttaata
cttctttttttgatcctgctgggggaggggatcctattttatttcaacattta
>SMNKARA08189_Pisaura_mirabilis_8y58E_48y89N_ad_f_A_Pisauridae
ctttatatttaatatttggagtttgatctgctatagcaggaactgctataagagtattaa
ttcgaatagagttaggaaatcctggaagattattaggagatgatcatttatataatgtag
tggttactgctcatgcttttgttataattttttttatagttatacctattataattggag
gttttggtaattgattagttcctttaatattaggagctcctgatatatcatttccccgaa
taaataatttgtctttttgacttttacctccttctctatttttattatttatatcttcta
tagtagaaataggagttggtgctggttgaacagtttatcctcctttagcatctacagttg
gtcatataggaagatctatagattttgctattttttctttacatttagctggggcttctt
ctattataggagccgttaattttatttctactattataaatatacgattaaatggaatgt
caatagaaaaaatccctttatttgtatggtctgttttaattactgctattttacttttat
tgtctttaccagttttagctggtgctattactatattattaactgatcgaaattttaata
cttctttttttgatccagctggtgggggtgatcctattttatttcaacattta
>SMNKARA08190_Pisaura_mirabilis_8y58E_48y89N_ad_f_A_Pisauridae
ctttatatttaatatttggagtttgatctgctatagcaggaactgctataagagtattaa
ttcgaatagagttaggaaatcctggaagattgctaggagatgatcatttatataatgtag
tggttactgctcatgcttttgttataattttttttatagttatacctattataattggag
gttttggaaattgattagttcctttaatattaggagctcctgatatatcatttccccgaa
taaataatttgtccttttgacttttacccccttccctatttttattatttatatcttcta
tagtagaaataggagttggtgctggttgaacagtttatcctcctttagcatctacagttg
gtcatataggaagatctatagattttgctattttttctttacatttagctggagcttctt
ctattataggagccgttaattttatttctactattataaatatacgattaaatggaatgt
caatagaaaaaatccctttatttgtatggtctgttttaattactgctattttacttttat
tgtctttaccagttttagctggtgctattactatattattaactgatcgaaattttaata
cttctttttttgatccagctggtggaggtgatcctattttatttcaacattta
>SMNKARA08191_Pisaura_mirabilis_8y87E_48y8N_ad_f_A_Pisauridae
ctttatatttaatatttggagtttgatctgctatagcaggaactgctataagagtattaa
ttcgaatagagttaggaaatcctggaagattgctaggagatgatcatttatataatgtag
tggttactgctcatgcttttgttataattttttttatagttatacctattataattggag
gttttggaaattgattagttcctttaatattaggagctcctgatatatcatttccccgaa
taaataatttgtccttttgacttttacccccttccctatttttattatttatatcttcta
tagtagaaataggagttggtgctggttgaacagtttatcctcctttagcatctacagttg
gtcatataggaagatctatagattttgctattttttctttacatttagctggagcttctt
ctattataggagccgttaattttatttctactattataaatatacgattaaatggaatgt
caatagaaaaaatccctttatttgtatggtctgttttaattactgctattttacttttat
tgtctttaccagttttagctggtgctattactatattattaactgatcgaaattttaata
cttctttttttgatccagctggtggaggtgatcctattttatttcaacattta
>SMNKARA08192_Alopecosa_cuneata_8y87E_48y8N_ad_m_A_Lycosidae
ctttatatttaatattaggtatttgatcagctataataggaactgctatatcagtattaa
ttcgaatggaattaggtaatcctggaagtttattaggagatgatcatttatataatgtta
tagttactgctcatgcttttgtaatgattttttttatagtaataccaattcttattggtg
ggtttggtaattgattagttcctttgatattaggagctcctgatatatcatttcctcgta
taaataatctttctttttgattattacctccttctttatttttgttatgtatatcttcta
tagtagaaataggggtaggagctggttgaactgtttatcctcctttggcatcaagaatag
gtcatacaggaagttctatggattttgctattttttctcttcatttagctggggcttctt
ctattataggagcagtaaattttatttctactattattaatatacgaatattaggtatat
caatagagaaagttcctttatttgtttgatcagttttaattacagcagttttattattac
tttctttacctgttttagcaggtgctattactatattattaactgatcgaaattttaata
cttctttttttgatccagcaggtggaggggatcctattttatttcaacattta
>SMNKARA08193_Alopecosa_cuneata_8y87E_48y8N_ad_f_A_Lycosidae
ctttatatttaatattaggtatttgatcggctataataggaactgctatatcagtattaa
ttcgaatggaattaggtaatcctgggagtctattaggagatgatcatttatataatgtta
tagttactgctcatgcttttgtaatgattttttttatagtaataccaattcttattggtg
ggtttggtaattgattagttcctttaatattaggagcccctgatatatcatttcctcgta
taaataatctttctttttgattattacctccttctttatttttgttatgtatatcttcta
tagtagaaataggggtaggagctggttgaactgtttatcctcctttagcatcaagaatag
gtcatacaggaagttctatggattttgctattttttctcttcatttagctggggcctctt
ctattataggagcagtaaattttatttctactattattaatatacgaatattaggtatat
caatagagaaagttcctttatttgtttgatcagttttgattacagcagttttattattac
tttctttacctgttttagcaggtgctattactatattattaactgatcgaaattttaata
cttctttttttgatccagcaggtggaggggatcctattttatttcaacattta
>SMNKARA08194_Evarcha_falcata_8y87E_48y8N_ad_m_A_Salticidae
ctttatatttaatttttggagcttgggctgctatagtaggtactgctataagagtattga
ttcgaatagaattagggcagactggaagatttttaggaaatgaacatttatataatgtta
ttgttacagctcacgcatttgttataattttttttatagtaatacctattataattggtg
gttttggtaattgattggtaccattgatactaggggctccggatatagcttttcctcgta
tgaataatttaagattttgattattgcctccttctttaatgttattatttatttcttcta
tagctgaaataggagtaggagctggatgaacagtatatcctcctttagcctctattgtcg
gtcataatggaagatctgtagattttgctattttttctttacatttagctggagcatctt
ctattatgggtgctattaattttatttcaactatcattaatatacgatcggtaggaatat
caatggataaagtttctttatttgtatgatcagttttaattactgctgtactattactat
tatcattaccagttctagctggagctattactatgttattaactgatcgaaattttaata
cctctttttttgatcctgcgggaggaggagatccaattttatttcaacattta
>SMNKARA08196_Trachyzelotes_pedestris_8y87E_48y8N_ad_f_A_Gnaphosidae
ctttgtatttattgtttggttcatgagctgctatggttggtactgcaataagagtattaa
ttcgaatagaattaggtcaatctggtagattgattggtgatgatcatttgtataatgtta
ttgttactgctcatgcgtttgtaataattttttttatagttatgccaattataattggtg
gatttggaaattgattgattcctttaatattaggtgctcctgatatagcatttcctcgaa
tgaataacttgagtttttgattattacctccttcgttaataatattatttatttcttcaa
tagttgaaataggtgttggggctggttgaactgtttaccctccattggcttctaatatag
gtcatgcggggagagctatagattttgctattttttctttgcacttggcaggagcatctt
ctattataggagcaattaattttatttctactgtaattaatatgcgttctattggtataa
agatagaaaggattcctttgtttgtatgatcagtatttattacagcggtgttattattat
tatccttacctgttttagcaggtgctattactatgttactgactgatcgaaattttaata
cttcattttttgacccagcagggggtggggatcctattttatttcaacatttg
>SMNKARA08197_Callilepis_nocturna_8y87E_48y8N_ad_f_A_Gnaphosidae
ctttatatttattatttggatgttggtctgctatagttggtacagctataagagtattaa
ttcgaatggaattaggtcaggtaggtagattgttgggtgatgatcatttatataatgtta
ttgtaactgctcatgcttttattataattttttttatagtaatacctattttgattggag
gttttggtaattgattggtacctttaatgttaggtgcacctgatatggcgtttcctcgaa
tgaataatttaagtttttgattattaccaccttcattaattatattatttgtttcgtcaa
tagtggagatgggagtaggggctggttgaacagtatatcctccactggcttctgttgttg
ggcatcctgggagagcgatagattttgctattttttctttacatttagctggagcttctt
ctattataggtgctattaattttatttctactgtaattaatatacgatctttatctataa
caatagaaaaggttcctttatttgtttggtctgtactgattacggcagtattattattac
tatcattgccggtgttagctggggctattactatattattaacagatcgaaattttaata
cttcattttttgatcctgctggagggggtgatcctgttttatttcaacattta
>SMNKARA08198_Araneus_triguttatus_8y87E_48y8N_ad_f_A_Araneidae
cattatatttagtgtttggggcatgagctgcaatagtggggactgctataagagtattga
ttcgagttgagttagggcagtctggtagatttattggggatgatcagctttataatgtaa
ttgttactgctcatgcttttgttataattttttttatagttatacctattttaattggtg
gttttggtaattgattagttcctttaatattaggagctcctgatatggcatttccacgaa
taaataatcttagtttttgattattacccccgtcattgtttcttttaattatttcttcta
tagtagaaatgggtgtgggggcaggttgaactgtatatcctcctttagctagattagaag
gacattcaggaagatctgtagattttgctattttttctttacatttggctggtgcttcat
ccattatgggagctattaattttatttcaactattattaatatacgattttatggaataa
ctatagaaaaggttcctttatttgtatgatctgtattaattactgctgttttattattat
tgtctttacctgttttagctggtgctattactatattattaactgatcggaattttaaca
cttctttttttgatccttcaggtgggggagatcctattttatttcagcattta
>SMNKARA08200_Dictyna_arundinacea_8y87E_48y8N_ad_f_A_Dictynidae
ctctttatttattgtttggggcttgagctgctatagtaggtactgcaataagagtattga
ttcgaattgagttggggcagcctggtagatttttgggaaacgatcaaatttataatgtta
tggttactgctcatgcttttgtgataattttttttatagttatacctattttaattggag
ggtttggaaattgattggttcctttaatgttaggggctcctgatatagcttttcctcgta
taaataatttaagattttgattattacctccttctttattattattgtttatttcttcta
tagttgagataggagtaggggccggatgaacaatttatcctcctttggcttctgtggttg
gacattcaggaagatctgtggattttgcaattttctctcttcatttagctggtgcttctt
cgattataggtgctattaattttatttcaactattattaatatacggatggaagggatgt
caatggaaaaggttccattatttgtttgatctgtattaattactgctgtattattattgt
tatctcttcctgttttagcgggggctattacaatattgttaactgatcgaaattttaata
catctttttttgatcctgcggggggaggtgatcctattttatttcaacattta
>SMNKARA08201_Asagena_phalerata_8y87E_48y8N_jv_f_A_Theridiidae
ctttatatttattatttggagcttgatctgctatagtaggcacagctataagagtcttaa
ttcgggtggagttagggcaaccaggaaggttactaggagatgatcaattatataatgtta
ttgtaactggtcatgcatttattataattttttttatagtaatgcctattttaattggag
gttttggaaattggttagttcctttaatattaggggctcctgatatagcttttcctcgaa
taaataatttgagtttttggttattacccccttctttaatacttttgtttatctcttcta
tggaagagataggagtaggagcaggatggactatttatcctcctttatcttctttagaag
gtcatagaggaagatctgtggattttgctattttttctttacatttagctggggcttctt
ctattatgggggctattaattttatttctacaattttaaatatacgtttgtttggaataa
ctatagaaaaggttagattatttgtttggtctgtattgatcactgctgtattattattat
tatctttgcctgttttagcgggggctattactatactacttactgatcgtaattttaata
cttctttttttgatcctgctggagggggggatccaattttatttcaacatttg
>SMNKARA08202_Mermessus_trilobatus_8y87E_48y8N_ad_f_A_Linyphiidae
gtttatattttgtttttggggcttgatctgctatagtaggtacagcgataagagtattaa
ttcgaattgaattaggacaagttggtagacttttaggagatgatcaattatataatgtta
ttgttacagctcatgcttttattataattttttttatagttatgcctattttaattggag
gatttggtaattgattagttcctttaatattaggtgcgcctgatatagcttttcctcgaa
taaataatttaagattttgattattgcccccttctttattattgttatttatttcaagaa
tagatgaaatgggtgttggggctggatgaactgtttatccccctttagcttctttagaag
gtcattctggtagatcagtggattttgcaattttttctttacatttagctggggcttctt
caattataggagctattaattttatttctacaattttaaatatacgagggtatggtataa
caatagaaaaagtacctttatttgtatgatctgtattaattactgctgttttgttattat
tatctttacctgttttagcaggtgctattactatacttttaactgatcgaaattttaata
cttctttttttgatccttctggagggggagatcctgtattgtttcaacatttg
>SMNKARA08203_Platnickina_tincta_8y87E_48y8N_ad_f_A_Theridiidae
cattatatttggtttttggggcttgagctgcaatagttggaactgctataagagttttaa
ttcgagttgaattaggtcaacctggaagatttttaggtgatgatcaattatataatgtaa
ttgtaacggctcatgcttttgtaataattttttttatagttatacctattttaattggag
gatttggtaattgattagtgcctttaatgttaggtgttcctgatatagcttttcctcgaa
taaataatttgagattttgattattaccaccttcattaattttattatttatttctagaa
tggtggaaataggagtaggtgctggttgaacagtataccctccattatcatctttagatg
gtcatggtggtagttctgtagattttgccattttttctcttcatttagctggagcttctt
caattataggtgctgtaaattttattactactgtaataaatatacgatcttatgggatga
caatagaaaaggtacctttatttgtatgatctgtattaattactgctgtattattgttat
tgtcattgcctgttttagctggagctattactatattattaactgatcgaaattttaata
catcattttttgacccagcgggtgggggagatcctattttatttcaacattta
>SMNKARA08204_Xysticus_cristatus_8y87E_48y8N_ad_f_A_Thomisidae
cattatatttattgtttggtgcttgatctgctatagttggaactgcgataagagtattaa
ttcgaatggaattaggaaatgtgggtagattattaggaaatgatcatctatataatgtta
ttgttacagctcatgcttttgtaatgattttttttatagtaatacctattttgattggtg
gatttggaaattgattagtacctttaatattaggtgctcctgatatatcttttcctcgga
taaataatttgtctttttgattacttcctccttcgttatttttattatttatatcatcta
tagtagaaataggtgtgggtgcaggatgaactgtttatcctcctttggcttctagtgtag
gacatataggaagatcaatagattttgctattttttctttacatttagcaggtgcttctt
ctattataggggctgttaattttatttctactattattaatatacgagtaactggaatga
gtatggaaaaagttcctttatttgtttgatctgttttaattacagctattttacttcttt
tatctttacctgttttagctggagctattactatgttacttactgatcgtaattttaata
cttctttctttgaccctgctgggggaggggatccaattttattccaacattta
>SMNKARA08205_Xysticus_cristatus_8y87E_48y8N_ad_m_A_Thomisidae
cattatatttattgtttggagcttgatctgctatagttggaactgcgataagagtattaa
ttcgaatggaattaggaaatgtgggtagattattaggaaatgatcatttatataatgtta
ttgttacagctcatgcttttgtaatgattttttttatagtaatacctattttgattggtg
gatttggaaattgattagtacctttaatattaggtgctcctgatatatcttttcctcgga
taaataatttgtctttttgattacttcctccttcgttatttttattatttatatcatcta
tagtagaaataggtgtgggtgcaggatgaactgtttatcctcctttggcttctagtgtag
gacatataggaagatcaatagattttgctattttttctttacatttagcaggtgcttctt
ctattataggggctgttaattttatttctactattattaatatacgagtaactggaatga
gtatggaaaaagttcctttatttgtttgatctgttttaattacagctattttacttcttt
tatctttacctgttttagctggagctattactatgttacttactgatcgtaattttaata
cttctttctttgaccctgctgggggaggggatccaattttattccaacattta
>SMNKARA08206_Diaea_dorsata_8y87E_48y8N_jv_f_A_Thomisidae
ctttatatttattatttggtgcttgatcagcaatagtaggaactgctatgagtgtaatta
ttcgtatagaattaggaaattctggagcatttttaggtaatgatcatttatataatgtta
ttgttacagctcatgcatttgtaatgattttttttatagtaatacctattttaattgggg
gatttggaaattgattagtacctttaatgttaggagctcctgatatatcatttcctcgaa
taaataatttatctttttgacttttacctccttctttatttttactatttatatcgtcaa
tggtagaaataggtgtaggtgcagggtggactgtttatcctcctttagctgggagtgtgg
gtcatataggtatatctatggattttgccattttttcattacatttagctggagcttcat
ctattataggtgctgtaaattttatttcaactattattaatatgcgaagaagaggaataa
gaatggaaaaggttccattgtttgtttgatctgttttaattactgctgttttacttcttt
tatctttacctgttttagcaggagctattactatacttcttactgatcgaaattttaata
cttctttttttgatccagcaggagggggggatcctattttatttcaacattta
>SMNKARA08207_Aculepeira_ceropegia_8y87E_48y8N_jv_m_A_Araneidae
ctttatatttaatttttggggcttgggcggctatagtaggtacagctataagagtattaa
ttcgaattgaattaggtcaaccaggaaggtttttaggggatgatcaattatacaatgtaa
ttgtaacagcacatgcttttgtaataattttttttatagtaataccaattttaattgggg
gttttggaaattgattagttcctttaatattgggagctcctgatatagcatttcctcgaa
taaataatttaagattttgattattacccccttcattatttttattaattgtgtcttcaa
tagtagaaatgggagtaggagctgggtgaactgtttatccgccattagctgggttagaag
gacatgctgggagatctgtagattttgcaattttttccttacatctagctggggcttctt
ctattatgggtgctattaattttatttcaacaattattaatatgcgatcttatgggataa
ctatggaaaaggttcccttatttgtatgatctgttttaattacagctgttttattacttc
tttctttacctgttttagctggggctattacaatattattaacggatcgaaattttaata
catctttttttgatccttcgggaggtggagatcctattttatttcaacattta
>SMNKARA08208_Araniella_cucurbitina_8y87E_48y8N_ad_m_A_Araneidae
ctttatatttgatttttggggcttgggcagccatagttggaactgcaataagagtattaa
ttcgagttgaattagggcaatcagggagatttctcggggatgaccaattgtataatgtaa
ttgttacagcacacgcatttgttataattttttttatagtaatacctattttaattggag
gatttggtaattgactagtcccgttaatgttaggagctccggatatagcatttcctcgta
taaataatttaagattttgattattacctccttctttatttttattaattatttcttcaa
tagtagaaataggggttggggctggttgaacagtttacccccctctagccgggctagagg
gacatgctgggagttctgtagattttgctattttctctcttcatttggctggggcatctt
ctattataggggctattaattttatttctactattattaatatgcgtttttatggaataa
gaatagaaaaggttcctttatttgtttgatctgttcttattacagctgttttattacttt
tatcacttccggtattagccggggctattactatattattgactgatcgaaattttaata
cctctttttttgacccgtctgggggtggggatcctattttatttcaacattta
>SMNKARA08209_Araniella_cucurbitina_8y87E_48y8N_jv_f_A_Araneidae
ctttatatttgatttttggggcttgggcagccatagttggaactgcaataagagtattaa
ttcgagttgaattagggcaatctgggagatttctcggggatgaccaattgtataatgtaa
ttgttacagcacatgcatttgttataattttttttatagtaatacctattttaattggag
ggttcggtaattgactagtcccgttaatgttaggagctccggatatagcatttcctcgta
tgaataatttaagattttgattattacctccttctttatttttattaattatttcttcaa
tagtagaaataggggttggggctggttgaacagtttacccccctctagccgggctagagg
gacatgctgggagttctgtagattttgctattttctctcttcatttggctggggcatctt
ctattataggggctattaattttatttctactattattaatatgcggttttatggaataa
gaatagaaaaggttcctttatttgtttgatctgttcttattacagctgttttattacttt
tatcacttccggtattagccggggctattactatattattgactgatcgaaattttaata
cctctttttttgacccgtctgggggtggggatcccattttatttcaacattta
>SMNKARA08210_Xysticus_cristatus_8y58E_48y89N_ad_f_A_Thomisidae
cattatatttattgtttggtgcttgatctgctatagttggaactgcgataagagtattaa
ttcgaatggaattaggaaatgtgggtagattattaggaaatgatcatctatataatgtta
ttgttacagctcatgcttttgtaatgattttttttatagtaatacctattttgattggtg
gatttggaaattgattagtacctttaatattaggtgctcctgatatatcttttcctcgga
taaataatttgtctttttgattacttcctccttcgttatttttattatttatatcatcta
tagtagaaataggtgtgggtgcaggatgaactgtttatcctcctttggcttctagtgtag
gacatataggaagatcaatagattttgctattttttctttacatttagcaggtgcttctt
ctattataggggctgttaattttatttctactattattaatatacgagtaactggaatga
gtatggaaaaagttcctttatttgtttgatctgttttaattacagctattttacttcttt
tatctttacctgttttagctggagctattactatgttacttactgatcgtaattttaata
cttctttctttgaccctgctgggggaggggatccaattttattccaacattta
>SMNKARA08211_Xysticus_cristatus_8y58E_48y89N_ad_m_A_Thomisidae
cattatatttattgtttggtgcttgatctgctatagttggaactgcgataagagtattaa
ttcgaatggaattaggaaatgtgggtagattattaggaaatgatcatctatataatgtta
ttgttacagctcatgcttttgtaatgattttttttatagtaatacctattttgattggtg
gatttggaaattgattagtacctttaatattaggtgctcctgatatatcttttcctcgga
taaataatttgtctttttgattacttcctccttcgttatttttattatttatatcatcta
tagtagaaataggtgtgggtgcaggatgaactgtttatcctcctttggcttctagtgtag
gacatataggaagatcaatagattttgctattttttctttacatttagcaggtgcttctt
ctattataggggctgttaattttatttctactattattaatatacgagtaactggaatga
gtatggaaaaagttcctttatttgtttgatctgttttaattacagctattttacttcttt
tatctttacctgttttagctggagctattactatgttacttactgatcgtaattttaata
cttctttctttgaccctgctgggggaggggatccaattttattccaacattta
>SMNKARA08212_Tibellus_oblongus_8y58E_48y89N_ad_f_A_Philodromidae
ctttatatttaatttttggtgcgtgggcggctatagttggaactgcaataagcgtattaa
ttcgtatggagttaggtcaagttggtaaatttttaggtgatgatcatttatataatgtaa
ttgttactgctcatgcatttgttatgattttctttatagttatacctgttttgattggag
gatttggtaattgattagttcctttaatgttaggggctcctgatatggcttttcctcgta
taaataatttaagattttggttacttccaccttcattattattattatttatttcatcaa
tagtagaaataggagttggagcaggatgaactgtttatcctccattagcatcattaatag
gacatgctggtagagctgtagattttgcaattttttcattacatttagctggtgcttcat
ctattataggggctattaattttatttcaacagttgttaatatacgctcattaggtataa
gaatggaaaaggtaccattgttcgtatgatctgtggtgattacggctgtgttattattgt
tatctcttccggttttagctggagctattacaatattgttaactgatcgtaattttaata
cttctttttttgatccagctggaggaggtgatcctattttatttcaacattta
>SMNKARA08213_Oxyopes_ramosus_8y58E_48y89N_ad_m_A_Oxyopidae
ctttatatttaatatttggagtttggtcagctatagtaggaacagctataagagttttaa
ttcgtatagaattaggtcattctggaagaatattgggagatgatcatttatataatgtta
ttgttactgctcatgcttttgtaataattttttttatagttatgccaattttgattggtg
gatttggaaattgattagttcctttaatattaggggctcctgatatatcatttcctcgaa
taaataatttatcattttgattacttcctccttctttgtttttattatttatatcttcta
tagttgaaataggggtaggagcggggtggacagtatatcctcctttagcttctagtactg
gtcatataggaagatcaatagattttgctattttttctttacatttagctggtgcttctt
ctattataggagctgtaaattttatttctactattattaatatacggttaagtagaataa
gaatagaaaaggttcctttatttgtatgatctgtttttattactgctattttattattat
tatctttacctgttttagcaggagctattactatattattaactgatcgaaattttaata
cttctttttttgatcctgctggaggaggagatcctattttatttcaacattta
>SMNKARA08214_Xysticus_lanio_8y58E_48y89N_ad_f_A_Thomisidae
cattatatttattatttggagcttggtcagctatagtagggactgcaataagagttttga
ttcgtttagaattaggaaatgtagggagattattaggaaatgatcatttgtataatgtaa
ttgttacagctcatgcttttgttatgattttttttatagtaatacctattttaattggtg
gatttggaaattgattagtaccattaatattaggagctccggatatatcttttcctcgaa
taaataatttatctttttggttacttcctccttctttatttttattatttatatcatctt
tggtggaaataggtgtaggtgcagggtggactgtatatcctcctttagcttctagtgtag
gccatataggaatatcaatagattttgctattttttctcttcatttagcaggagcttctt
ctattataggagctgtgaattttatttctacaattattaatatacgagtaactgggatat
ctatagaaaaaatacctttatttgtatgatctgttttagtcacagctattttacttcttt
tatctttacctgttttagcaggggctattacaatattacttacagatcgaaattttaata
cttctttttttgaccctgcagggggaggtgaccctattttatttcaacattta
>SMNKARA08215_Evarcha_arcuata_8y58E_48y89N_ad_m_A_Salticidae
ctttatatttaatttttggagcttgagctgctatagtaggaactgctataagagtattaa
ttcgaatagaattgggacaaactggtagttttttgggaaatgaacatttatataatgtta
ttgttactgctcatgcatttgttataatcttttttatagttatgcctattataattggag
gttttggtaattgattagttcctttaatgttaggagctcctgatatagcttttcctcgaa
taaataatttaagattttgacttttacctccttctttaatattattatttatttcatcta
tagctgaaataggggtaggagctggatgaacagtatatccacctttagcttctattgtgg
gtcataatggtagatctgtggatttcgctattttttctttgcatttggctggggcatctt
ctattataggtgctattaattttatttcaactgttattaatatacgatcagtaggaatat
caatagataaaatttctttatttgtatgatcggttttaattactgctgtattattattat
tatcattaccagtattagcaggtgctattactatattattaactgatcgaaattttaata
cttctttctttgatcctgcaggtggaggtgatccaattttgtttcaacattta
>SMNKARA08216_Evarcha_arcuata_8y58E_48y89N_ad_f_A_Salticidae
ctttatatttaatttttggagcttgagctgctatagtaggaactgctataagagtattaa
ttcgaatagaattgggacaaactggtagttttttgggaaatgaacatttatataatgtta
ttgttactgctcatgcatttgttataatcttttttatagttatgcctattataattggag
gttttggtaattgattagttcctttaatgttaggagctcctgatatagcttttcctcgga
taaataatttaagattttgacttttacctccttctttaatattattatttatttcatcta
tagctgaaataggggtaggagctggatgaacggtatatccacctttagcttctattgtgg
gtcataatggtagatctgtggatttcgctattttttctttgcatttggctggggcatctt
ctattataggtgctattaattttatttcaactgttattaatatacgatcagtaggaatat
caatagataaaatttctttatttgtatgatcggttttaattactgctgtattattattat
tatcattaccagtattagcaggtgctattactatattattaactgatcgaaattttaata
cttctttctttgatcctgcaggtggaggtgatccaattttgtttcaacattta
>SMNKARA08217_Evarcha_arcuata_8y58E_48y89N_jv_m_A_Salticidae
ctttatatttaatttttggagcttgagctgctatagtaggaactgctataagagtattaa
ttcgaatagaattgggacaaactggtagttttttgggaaatgaacatttatataatgtta
ttgttactgctcatgcatttgttataatcttttttatagttatgcctattataattggag
gttttggtaattgattagttcctttaatgttaggagctcctgatatagcttttcctcgaa
taaataatttaagattttgacttttacctccttctttaatattattatttatttcatcta
tagctgaaataggggtaggagctggatgaacagtatatccacctttagcttctattgtgg
gtcataatggtagatctgtggatttcgctattttttctttgcatttggctggggcatctt
ctattataggtgctattaattttatttcaactgttattaatatacgatcagtaggaatat
caatagataaaatttctttatttgtatgatcggttttaattactgctgtattattattat
tatcattaccagtattagcaggtgctattactatattattaactgatcgaaattttaata
cttctttctttgatcctgcaggtggaggtgatccaattttgtttcaacattta
>SMNKARA08218_Heliophanus_cupreus_8y58E_48y89N_ad_m_A_Salticidae
ctttatatttaatttttggagcatgatctgctatagtaggaacggcaatgagagttttga
ttcggatggaattaggtcagactggtagatttttaggtaatgatcatatatataatgtaa
ttgtaacggcacatgcttttgttataattttttttatagtaataccgattttgattggag
gatttggtaattgattagttcctttaatgttaggagctcctgatatagcttttcctcgaa
tgaataatttaagattttgattattacctccttcgttaatattattgtttatttcttcta
tggctgaaataggggttggagcggggtgaactgtttatcctcctttagcttctattattg
gtcacaatgggagttctgttgattttgcgattttttctttacatttggctggagcttctt
ctattataggagctattaattttatctctacggttattaatatacgttctgttggtataa
gattagaaaaagttcctttatttgtatgatctgtagtaattacggctgtattattattat
tatcattgcctgtattagctggtgctattactatattattaacagatcgtaattttaata
cttcattttttgatcctgctggtgggggtgatcctattttatttcaacattta
>SMNKARA08219_Atypus_piceus_8y58E_48y89N_ad_f_A_Atypidae
ctttgtatataatttttggaatttgatcaggtattataggaatatctatgagaataatta
ttcggattgagttaggtatattgggaagttttttaggaaatgatcagctttataatgtga
ttgtaactagtcatgcttttgttatgattttttttatagtaataccaattataatggggg
ggtttggaaattgattaattcctttaataattggagcgcctgatatggctttccctcgga
tgaataatttaagtttttggttattacctccttctttgttttttttaatgttgtctgctt
ttttagatgttggggtgggaacagggtgaacattatatccgcctctttcttcaataatgt
ttcagtcaggggtaagagtagattttgctattttttcgttacacttagcgggggcttctt
ctattataggttctattaattttatttcaactgttattaatatgcggtctgagggaataa
gaatagataaggtgcctttatttgtttggtctgtaataattactgcaattttattattat
tggctttaccagtactagctggtgctattactatgttattaactgatcgaaattttaata
caactttttttgatccttctgggggtggtgatcctattttatttcaacattta
>SMNKARA08220_Trochosa_terricola_8y48E_48y97N_ad_m_A_Lycosidae
ctttgtatttaatgtttggtgtatgatctgctatagtgggaactgctataagagtattga
ttcgtttagaattagggaattctggaagtttattaggggatgatcatttatataatgtta
tggttacagctcatgcttttgtgatgattttttttatagtaataccaattcttattggag
gttttggaaattgattaattcctttaatattaggtgctcctgatatatcgtttcctcgaa
taaataatctttctttttggttattacctccttctttatttttattatctatgtcttcta
tggtggaaataggagtgggggctggttgaacagtttatcctcctttagcatctagagtgg
gtcatatagggagttctatagattttgctattttttctcttcatttagctggtgcttctt
ctattataggagcagtaaattttatttctactattattaatatacgaatattaggtatat
ctatagataaagtacctttatttgtttgatcagttttgattacggctgttttattattat
tatctttacctgttttagcgggtgctattactatattattaactgatcgaaattttaata
cttctttttttgatcctgcagggggaggggatcctattttatttcaacattta
>SMNKARA08221_Trochosa_terricola_8y48E_48y97N_ad_m_A_Lycosidae
ctttgtatttaatgtttggtgtatgatctgctatagtgggaactgctataagagtattga
ttcgtttagaattagggaattctggaagtttattaggggatgatcatttatataatgtta
tggttacagctcatgcttttgtgatgattttttttatagtaataccaattcttattggag
gttttggaaattgattaattcctttaatattaggtgctcctgatatatcgtttcctcgaa
taaataatctttctttttggttattacctccttctttatttttattatctatgtcttcta
tggtggaaataggagtgggggctggttgaacagtttatcctcctttagcatctagagtgg
gtcatatagggagttctatagattttgctattttttctcttcatttagctggtgcttctt
ctattataggagcagtaaattttatttctactattattaatatacgaatattaggtatat
ctatagataaagtacctttatttgtttgatcagttttgattacggctgttttattattat
tatctttacctgttttagcgggtgctattactatattattaactgatcgaaattttaata
cttctttttttgatcctgcagggggaggggatcctattttatttcaacattta
>SMNKARA08222_Alopecosa_cuneata_8y48E_48y97N_ad_m_A_Lycosidae
ctttatatttaatatgaggtatttgatcggctataataggaactgctatatcagtattaa
ttcgaatggaattaggtaatcctgggagtctattaggagatgatcatttatataatgtta
tagttactgctcatgcttttgtaatgattttttttatagtaataccaattcttattggtg
ggtttggtaattgattagttcctttaatattaggagcccctgatatatcatttcctcgta
taaataatctttctttttgattattacctccttctttatttttgttatgtatatcttcta
tagtagaaataggggtaggagctggttgaactgtttatcctcctttagcatcaagaatag
gtcatacaggaagttctatggattttgctattttttctcttcatttagctggggcctctt
ctattataggagcagtaaattttatttctactattattaatatacgaatattaggtatat
caatagagaaagttcctttatttgtttgatcagttttgattacagcagttttattattac
tttctttacctgttttagcaggtgctattactatattattaactgatcgaaattttaata
cttctttttttgatccagcaggtggaggggatcctattttatttcaacattta
>SMNKARA08223_Alopecosa_cuneata_8y48E_48y97N_ad_f_A_Lycosidae
ctttatatttaatattaggtatttgatcggctataataggaactgctatatcagtattaa
ttcgaatggaattaggtaatcctgggagtctattaggagatgatcatttatataatgtta
tagttactgctcatgcttttgtaatgattttttttatagtaataccaattcttattggtg
ggtttggtaattgattagttcctttaatattaggagcccctgatatatcatttcctcgta
taaataatctttctttttgattattacctccttctttatttttgttatgtatatcttcta
tagtagaaataggggtaggagctggttgaactgtttatcctcctttagcatcaagaatag
gtcatacaggaagttctatggattttgctattttttctcttcatttagctggggcctctt
ctattataggagcagtaaattttatttctactattattaatatacgaatattaggtatat
caatagagaaagttcctttatttgtttgatcagttttgattacagcagttttattattac
tttctttacctgttttagcaggtgctattactatattattaactgatcgaaattttaata
cttctttttttgatccagcaggtggaggggatcctattttatttcaacattta
>SMNKARA08224_Alopecosa_striatipes_8y19E_48y83N_ad_f_A_Lycosidae
ctttgtatttattactaggtgtttggtcagctataatagggactgctatatcagtgttaa
ttcgaatagaattaggtaatcctggaagtttattaggagatgatcatttatataatgtta
tagttactgctcatgcttttgttataattttttttatagttataccgattcttattggtg
ggtttggtaattggttagttcctttaatgttaggggctcctgatatatcatttcctcgaa
tgaataatctttctttctggttattacctccttctttgtttttgttatgtatatcttcta
tagtagagatgggagtgggagctggttgaactgtttatccacctttagcatcaagaatag
ggcatagaggaagttctatagattttgctattttttctcttcatttagctggggcttctt
ctattataggtgcggtaaattttatttctactattattaatatacgaatattgggaatat
cgatggaaaaggttcctttatttgtttgatcagttttaattacagctgttttgttattac
tttctttacctgtattagcaggtgctattactatgttgttaacggatcgaaattttaata
cttctttttttgacccagcaggtgggggggatcctattttatttcaacattta
>SMNKARA08225_Pardosa_agrestis_8y19E_48y83N_ad_f_A_Lycosidae
ctttatatttaatatttggggtttggtcagctataatagggactgctataagagtattaa
ttcgaatggaattaggaaatcctggaagattattaggagatgatcatttatataatgtta
tagttactgctcatgcttttgtaataattttttttatagtaataccaattcttattggag
gttttggtaattgattagttcctttaatattaggagctccggatatatcgtttcctcgaa
taaataatctttctttttgattattacctccttctttatttttattatctatatcttcta
tagtggaaataggagttggtgctggatgaactgtttatcctcctttgtcatctacagttg
gtcatataggaagttcaatagattttgctatcttttctcttcatttagctggtgcttctt
ctattataggggctgttaattttatttctactattattaatatacgaatactaggaatat
ctatagaaaaagttcctctttttgtttgatcagttttaattacggcagtattattgttac
tttctttacctgttttagcaggtgctattactatattattaacggatcgaaattttaata
cttctttttttgaccctgctggtgggggagatccaattttatttcaacattta
>SMNKARA08226_Xerolycosa_miniata_8y19E_48y83N_ad_f_A_Lycosidae
ctttgtatttaatatttggagtatgatcagctatagctggaactgctataagagtattga
ttcgaatggaattaggaaattctggtagtttattaggagatgatcatttatataatgtta
ttgtaactgctcatgcttttgttataattttttttatagttatgccaattttaattggag
ggtttggaaattggttagttcctttaatactgggagctcctgatatatcatttcctcgaa
taaataatctttctttttgattattacctccttctttatttttgttatttatatcttcta
tagtggaaatgggagttggagctggatgaacagtttatcctcctttagcttctagagtag
ggcatataggaagttctatagattttgctattttttctcttcatttagctggggcttctt
ctattataggagcggtaaattttatttctactattattaatatacgtttagttggaataa
caatagaaaaagtgcctttattcgtatgatctgtattaattactgctattttattattat
tatctcttcctgttttagcaggagctattactatattattaactgatcgtaattttaata
cttctttttttgatcctgctggaggaggagatccaattttatttcaacattta
>SMNKARA08227_Xerolycosa_miniata_8y19E_48y83N_ad_f_A_Lycosidae
ctttgtatttaatatttggagtatgatcagctatagctggaactgctataagagtattga
ttcgaatggaattaggaaattctggtagtttattaggagatgatcatttatataatgtta
ttgtaactgctcatgcttttgttataattttttttatagttatgccaattttaattggag
ggtttggaaattggttagttcctttaatattaggagctcctgatatatcatttcctcgaa
taaataatctttctttttgattattacctccttctttatttttgttatttatatcttcta
tagtggaaataggagttggagctggatgaacagtttatcctcctttagcttctagagtag
ggcatataggaagttctatagattttgctattttttctcttcatttagctggggcttctt
ctattataggagcggtaaattttatttctactattattaatatacgtttagttggaataa
caatagaaaaagtgcctttatttgtatgatctgtattaattactgctattttattactat
tatctcttcctgttttagcaggagctattactatattattaactgatcgtaattttaata
cttctttttttgatcctgctgggggaggggatccaattttatttcaacattta
>SMNKARA08228_Xerolycosa_miniata_8y19E_48y83N_ad_f_A_Lycosidae
ctttgtatttaatatttggagtatgatcagctatagctggaactgctataagagtattga
ttcgaatggaattaggaaattctggtagtttattaggagatgatcatttatataatgtta
ttgtaactgctcatgcttttgttataattttttttatagttatgccaattttaattggag
ggtttggaaattggttagttcctttaatactgggagctcctgatatatcatttcctcgaa
taaataatctttctttttgattattacctccttctttatttttgttatttatatcttcta
tagtggaaatgggagttggagctggatgaacagtttatcctcctttagcttctagagtag
ggcatataggaagttctatagattttgctattttttctcttcatttagctggggcttctt
ctattataggagcggtaaattttatttctactattattaatatacgtttagttggaataa
caatagaaaaagtgcctttattcgtatgatctgtattaattactgctattttattattat
tatctcttcctgttttagcaggagctattactatattattaactgatcgtaattttaata
cttctttttttgatcctgctggaggaggagatccaattttatttcaacattta
>SMNKARA08229_Xerolycosa_miniata_8y19E_48y83N_ad_f_A_Lycosidae
ctttgtatttaatatttggagtatgatcagctatagctggaactgctataagagtattga
ttcgaatggaattaggaaattctggtagtttattaggagatgatcatttatataatgtta
ttgtaactgctcatgcttttgttataattttttttatagttatgccaattttaattggag
ggtttggaaattggttagttcctttaatactgggagctcctgatatatcatttcctcgaa
taaataatctttctttttgattattacctccttctttatttttgttatttatatcttcta
tagtggaaatgggagttggagctggatgaacagtttatcctcctttagcttctagagtag
ggcatataggaagttctatagattttgctattttttctcttcatttagctggggcttctt
ctattataggagcggtaaattttatttctactattattaatatacgtttagttggaataa
caatagaaaaagtgcctttattcgtatgatctgtattaattactgctattttattattat
tatctcttcctgttttagcaggagctattactatattattaactgatcgtaattttaata
cttctttttttgatcctgctggaggaggagatccaattttatttcaacattta
>SMNKARA08230_Xerolycosa_miniata_8y19E_48y83N_ad_m_A_Lycosidae
ctttgtatttaatatttggagtatgatcagctatagctggaactgctataagagtattga
ttcgaatggaattaggaaattctggtagtttattaggagatgatcatttatataatgtta
ttgtaactgctcatgcttttgttataattttttttatagttatgccaattttaattggag
ggtttggaaattggttagttcctttaatactgggagctcctgatatatcatttcctcgaa
taaataatctttctttttgattattacctccttctttatttttgttatttatatcttcta
tagtggaaatgggagttggagctggatgaacagtttatcctcctttagcttctagagtag
ggcatataggaagttctatagattttgctattttttctcttcatttagctggggcttctt
ctattataggagcggtaaattttatttctactattattaatatacgtttagttggaataa
caatagaaaaagtgcctttattcgtatgatctgtattaattactgctattttattattat
tatctcttcctgttttagcaggagctattactatattattaactgatcgtaattttaata
cttctttttttgatcctgctggaggaggagatccaattttatttcaacattta
>SMNKARA08231_Xerolycosa_miniata_8y19E_48y83N_ad_m_A_Lycosidae
ctttgtatttaatatttggagtatgatcagctatagctggaactgctataagagtattga
ttcgaatggaattaggaaattctggtagtttattaggagatgatcatttatataatgtta
ttgtaactgctcatgcttttgttataattttttttatagttatgccaattttaattggag
ggtttggaaattggttagttcctttaatattaggagctcctgatatatcatttcctcgaa
taaataatctttctttttgattattacctccttctttatttttgttatttatatcttcta
tagtggaaataggagttggagctggatgaacagtttatcctcctttagcttctagagtag
ggcatataggaagttctatagattttgctattttttctcttcatttagctggggcttctt
ctattataggagcggtaaattttatttctactattattaatatacgtttagttggaataa
caatagaaaaagtgcctttatttgtatgatctgtattaattactgctattttattactat
tatctcttcctgttttagcaggagctattactatattattaactgatcgtaattttaata
cttctttttttgatcctgctgggggaggggatccaattttatttcaacattta
>SMNKARA08232_Xerolycosa_miniata_8y19E_48y83N_ad_m_A_Lycosidae
ctttgtatttaatatttggagtatgatcagctatagctggaactgctataagagtattga
ttcgaatggaattaggaaattctggtagtttattaggagatgatcatttatataatgtta
ttgtaactgctcatgcttttgttataattttttttatagttatgccaattttaattggag
ggtttggaaattggttagttcctttaatattaggagctcctgatatatcatttcctcgaa
taaataatctttctttttgattattacctccttctttatttttgttatttatatcttcta
tagtggaaataggagttggagctggatgaacagtttatcctcctttagcttctagagtag
ggcatataggaagttctatagattttgctattttttctcttcatttagctggggcttctt
ctattataggagcggtaaattttatttctactattattaatatacgtttagttggaataa
caatagaaaaagtgcctttatttgtatgatctgtattaattactgctattttattactat
tatctcttcctgttttagcaggagctattactatattattaactgatcgtaattttaata
cttctttttttgatcctgctgggggaggggatccaattttatttcaacattta
>SMNKARA08233_Xerolycosa_miniata_8y19E_48y83N_ad_m_A_Lycosidae
ctttgtatttaatatttggagtatgatcagctatagctggaactgctataagagtattga
ttcgaatggaattaggaaattctggtagtttattaggagatgatcatttatataatgtta
ttgtaactgctcatgcttttgttataattttttttatagttatgccaattttaattggag
ggtttggaaattggttagttcctttaatactgggagctcctgatatatcatttcctcgaa
taaataatctttctttttgattattacctccttctttatttttgttatttatatcttcta
tagtggaaatgggagttggagctggatgaacagtttatcctcctttagcttctagagtag
ggcatataggaagttctatagattttgctattttttctcttcatttagctggggcttctt
ctattataggagcggtaaattttatttctactattattaatatacgtttagttggaataa
caatagaaaaagtgcctttattcgtatgatctgtattaattactgctattttattattat
tatctcttcctgttttagcaggagctattactatattattaactgatcgtaattttaata
cttctttttttgatcctgctggaggaggagatccaattttatttcaacattta
>SMNKARA08234_Alopecosa_striatipes_8y19E_48y82N_ad_m_A_Lycosidae
ctttgtatttattactaggtgtttggtcagctataatagggactgctatatcagtgttaa
ttcgaatagaattgggtaatcctggaagtttattaggagatgatcatttatataatgtta
tagttactgctcatgcttttgttataattttttttatagttataccgattcttattggtg
ggtttggtaattggttagttcctttaatgttaggggctcctgatatatcatttcctcgaa
tgaataatctttctttctggttattacctccttctttgtttttgttatgtatatcttcta
tagtagagatgggagtgggagctggttgaactgtttatccacctttagcatcaagaatag
ggcatagaggaagttctatagattttgctattttttctcttcatttagctggggcttctt
ctattataggtgcggtaaattttatttctactattattaatatacgaatattgggaatat
cgatggaaaaggttcctttatttgtttgatcagttttaattacagctgttttgttattac
tttctttacctgtattagcaggtgctattactatgttgttaacggatcgaaattttaata
cttctttttttgacccagcaggtgggggggatcctattttatttcaacattta
>SMNKARA08235_Alopecosa_striatipes_8y19E_48y82N_ad_m_A_Lycosidae
ctttgtatttattactaggtgtttggtcagctataatagggactgctatatcagtgttaa
ttcgaatagaattgggtaatcctggaagtttattaggagatgatcatttatataatgtta
tagttactgctcatgcttttgttataattttttttatagttataccgattcttattggtg
ggtttggtaattggttagttcctttaatgttaggggctcctgatatatcatttcctcgaa
tgaataatctttctttctggttattacctccttctttgtttttgttatgtatatcttcta
tagtagagatgggagtgggagctggttgaactgtttatccacctttagcatcaagaatag
ggcatagaggaagttctatagattttgctattttttctcttcatttagctggggcttctt
ctattataggtgcggtaaattttatttctactattattaatatacgaatattgggaatat
cgatggaaaaggttcctttatttgtttgatcagttttaattacagctgttttgttattac
tttctttacctgtattagcaggtgctattactatgttgttaacggatcgaaattttaata
cttctttttttgacccagcaggtgggggggatcctattttatttcaacattta
>SMNKARA08236_Alopecosa_fabrilis_8y66E_49y33N_ad_f_A_Lycosidae
ctttatatttatttttaggtgtttgatcagctataatggggactgctatatcagtattaa
ttcgaatggaattgggtaatcctggaagtttattaggagatgatcatttatataatgtta
tagttactgctcatgcttttgtgataattttttttatggttataccaattcttattggtg
ggtttggtaattgattaattcctttaatattaggggctcctgatatatcatttcctcgaa
tgaataatctttctttctggttattacctccttctttgtttttgttatgtatatcttcta
tagtagagatgggagtaggagctggttgaactgtttatccacctttggcatcaagagtag
ggcatagaggaagttctatagattttgctattttttctcttcatttagctggggcttctt
ctattatgggtgcggtaaattttatttctactattattaatatacgtatattgggaatat
caatggaaaaggttcctttatttgtttgatcagttttaattacagctgttttgttattac
tttctttacctgtattagcaggtgctattactatattgttaacggatcgaaattttaata
cttctttttttgacccagcaggtgggggagatcctattttatttcaacattta
>SMNKARA08237_Dysdera_crocata_8y4E_49y01N_ad_f_A_Dysderidae
cgttatatttgttgtttggtgcttggtctgctatagtagggacagcaataagagttttaa
ttcgggcggagttgggacaggttggaagattattgggtgatgatcatttgtttaatgtgg
tggttacagcgcatgctttggttatgattttttttatagtaatacctattataattggag
gatttggtaattgattagtacctctgatgcttggggctcctgatatggcttttcctcgaa
tgaataatttaagtttttggttgttgcctccttctttaattttattggttatttcttcga
tagtggaaataggggtgggggctgggtggacgatttatccccccttgtcaggggcattag
ggcatgctggagtgtcggtagatttagctatttttagcttgcatttagctggggcttctt
ctattatgggggcaattaattttatttctacaattttgaatatgcggtctgagggaatat
ctttggatagggtacctttgtttgtgtgatctgttttagtaacagctgttttgttattgt
tgtcgttgccagttttagctggagcgattactatgttattaacggatcggaattttaata
catccttttttgacccagcgggaggaggggatcctattttgtttcagcattta
>SMNKARA08238_Aulonia_albimana_8y58E_48y89N_ad_m_A_Lycosidae
ctttgtatttaatatttggtatttgatcggctatggtaggtacggctataagagtattga
ttcgaatggagttaggtcattctggaagtttattgggagatgatcatttgtataatgttg
tagttactgctcatgcatttgttatgattttttttatagttatacctattttgattggag
gttttggaaattggttggttcctttaatattaggggctcctgatatatcatttcctcgta
taaataatctttctttttgattattacctccttctttgtttttattattaatgtcttctt
tggttgagataggggttggggcaggttgaactgtttatcctcctttggcttctagagttg
ggcatataggaagatctatggattttgctattttttctcttcatttggctggtgcttctt
ctattatgggagctgtaaattttatttctacaattattaatatacgggtagttggaatat
ctatagataaggttcctttgtttgtttgatctgtttttgttactgctgttttattgcttt
tgtctctacctgttttagcgggtgctattactatgttattgactgatcgaaattttaata
cttctttttttgatcctgctgggggaggggatcctattttatttcaacattta
>SMNKARA08239_Alopecosa_pulverulenta_8y21E_48y6N_ad_m_A_Lycosidae
ctttatatttaatattaggtgtttgatcggctataataggaactgctatatcagtattaa
ttcgaatggaattaggtaatcctggaagtttattaggagatgatcatttatataatgtta
tagttactgctcatgcttttgtaatgattttttttatagtaataccaattcttattggtg
ggtttggtaattgattagttcctttaatattaggagcccctgatatatcatttcctcgta
taaataatctttctttttgattattacctccttctttatttttgttatgtatatcttcta
tagtagaaataggggtaggagctggttgaactgtttatcctcctttggcatcgagaatag
gtcatacaggaagttctatggattttgctattttttctcttcatttagctggggcttctt
ctattataggagcagtaaattttatttctactattattaatatacgaatattaggtatat
caatagagaaagttcctttatttgtttgatcagttttaattacagcagttttattattac
tttccttacctgttttagcaggtgctattactatattattaactgatcgaaattttaata
cttctttttttgatccagcaggtggaggggatcctattttatttcaacattta
>SMNKARA08240_Pardosa_agrestis_8y48E_48y97N_ad_m_A_Lycosidae
ctttatatttaatatttggggtttggtcagctataatagggactgctataagagtattaa
ttcgaatggaattaggaaatcctggaagattattaggagatgatcatttatataatgtta
tagttactgctcatgcttttgtaataattttttttatagtaataccaattcttattggag
gttttggtaattgattagttcctttaatattaggagctccggatatatcgtttcctcgaa
taaataatctttctttttgattattacctccttctttatttttattatctatatcttcta
tagtggaaataggagttggtgctggatgaactgtttatcctcctttgtcatctacagttg
gtcatataggaagttcaatagattttgctatcttttctcttcatttagctggtgcttctt
ctattataggggctgttaattttatttctactattattaatatacgaatactaggaatat
ctatagaaaaagttcctctttttgtttgatcagttttaattacggcagtattattgttac
tttctttacctgttttagcaggtgctattactatattattaacggatcgaaattttaata
cttctttttttgaccctgctggtgggggagatccaattttatttcaacattta
>SMNKARA08241_Pardosa_amentata_8y22E_48y53N_ad_f_A_Lycosidae
ctttatatttaatatttggagtttgatcagctataataggaactgctataagagtattaa
ttcgaatggaattaggaaatcctggaagattattaggtgatgatcatttatataatgtta
tagttactgctcatgcttttgtaataattttttttatagtaataccaattcttattggag
gttttggtaattgattagttcctttaatattaggagccccagatatatcatttcctcgaa
taaataatctttctttttgattattacctccttctttatttttgttatctatgtcttcta
tagtggaaataggagttggtgctggatgaactgtttatcctcctttagcatctacggttg
gtcatatagggagttctatagattttgctattttttctcttcatttagctggagcttctt
ctattataggagcagtgaattttatttctactattattaacatacgaatattaggtatat
ctttagaaaaagttcccctttttgtttgatcagttttaattacagctgtattattattac
tttctttacctgtattagcaggtgcaattactatattattaacagatcgaaattttaata
cttctttttttgaccctgctggaggaggagatcctattttatttcaacattta
>SMNKARA08242_Pardosa_pullata_8y48E_48y97N_ad_m_A_Lycosidae
ctttatatttaatgtttggagtttgatcagctataataggaactgctataagagtgttaa
ttcgaatagaattaggaaatcctggaagattgttaggtgatgatcatttatataatgtta
tagttactgctcatgcttttgtaataattttttttatagtaataccaattcttattggag
gttttggaaattgattagttccattaatattaggagctccagatatatcatttcctcgaa
taaataatctttctttttgattattacctccttctttatttttattatctatatcttcta
tagtagaaataggggttggtgctgggtgaactgtttatcctcctttagcatctacagttg
gtcatataggaaattcaatggattttgctattttttctcttcatttggctggggcttctt
ctattataggggctgtgaattttatttctactattattaatatacgaatattgggaatat
cttttgaaaaggttcctctttttgtttgatcagttttaattacagcggtattgttattac
tttctttacctgttttagcaggtgctattactatattattaacggatcgaaattttaata
cttctttttttgaccctgctggtggaggggatcctattttatttcaacattta
>SMNKARA08243_Araniella_cucurbitina_8y48E_48y97N_ad_f_A_Araneidae
ctttatatttgatttttggggcttgggcagccatagttggaactgcaataagagtattaa
ttcgagttgaattagggcaatcagggagatttctcggggatgaccaattgtataatgtaa
ttgttacagcacacgcatttgttataattttttttatagtaatacctattttaattggag
gatttggtaattgactagtcccgttaatgttaggagctccggatatagcatttcctcgta
taaataatttaagattttgattattacctccttctttatttttattaattatttcttcaa
tagtagaaataggggttggggctggttgaacagtttacccccctctagccgggctagagg
gacatgctgggagttctgtagattttgctattttctctcttcatttggctggggcatctt
ctattataggggctattaattttatttctactattattaatatgcgtttttatggaataa
gaatagaaaaggttcctttatttgtttgatctgttcttattacagctgttttattacttt
tatcacttccggtattagccggggctattactatattattgactgatcgaaattttaata
cctctttttttgacccgtctgggggtggggatcctattttatttcaacattta
>SMNKARA08244_Araniella_cucurbitina_8y48E_48y97N_jv_f_A_Araneidae
ctttatatttgatttttggggcttgggcagccatagttggaactgcaataagagtattaa
ttcgagttgaattagggcaatcagggagatttctcggggatgaccaattgtataatgtaa
ttgttacagcacacgcatttgttataattttttttatagtaatacctattttaattggag
gatttggtaattgactagtcccgttaatgttaggagctccggatatagcatttcctcgta
taaataatttaagattttgattattacctccttctttatttttattaattatttcttcaa
tagtagaaataggggttggggctggttgaacagtttacccccctctagccgggctagagg
gacatgctgggagttctgtagattttgctattttctctcttcatttggctggggcatctt
ctattataggggctattaattttatttctactattattaatatgcgtttttatggaataa
gaatagaaaaggttcctttatttgtttgatctgttcttattacagctgttttattacttt
tatcacttccggtattagccggggctattactatattattgactgatcgaaattttaata
cctctttttttgacccgtctgggggtggggatcctattttatttcaacattta
>SMNKARA08245_Philodromus_albidus_8y48E_48y97N_jv_f_A_Philodromidae
ctttatatttaatttttggtgcgtgagcagcaatagttggaacggctataagtgtattaa
ttcgaatagaattaggtcaagtaggtaagtttttaggtgatgatcatttatataatgtaa
ttgtgactgcgcatgcatttgttataattttttttatagtaatacctattttaattggtg
gatttggaaattgattagttccattaatactaggtgcaccagatatagcatttcctcgaa
taaataatttaagtttctggttacttcctccatcattattactattatttatttcttcaa
tagttgaaataggagttggtgctggttgaacggtttatcctcctttagcatcagctacag
gacacgcaggaagtgccgttgattttgctattttttcattacatttagcaggggcatctt
ctattatagggtctattaattttatttctactattattaatatacgatctactgggataa
aaatagataaggtacctttatttgtgtgatctgttataattactactgtattattgcttt
tatcattacctgtattagcaggtgctattactatacttttaactgatcgaaattttaata
cttctttttttgatcctgctggagggggagatcctattttatttcaacattta
>SMNKARA08246_Philodromus_cespitum_8y48E_48y97N_jv_f_A_Philodromidae
cattatatttaatttttggagcatgagcagcaatagttggaacagcaataagagtattaa
ttcgaatagaattaggtcaagtaggtaaatttttaggtgatgatcatttatataatgtga
ttgtaactgcgcatgcttttgttataattttttttatagtaatacctattttaattgggg
gatttggtaattgattagtacctttaatattaggtgctccagatatagcttttcctcgaa
taaataatttaagtttttgattacttcctccatcattattattattatttatttcttcta
tagtagaaataggagttggaactggttgaacagtttatcctccattagcatcaatgacag
gacatgcaggtagtgcagttgattttgctattttttcattacatttagcaggtgcatctt
ctattataggttctattaattttatttctactattattaatatacgatctaatggaataa
aaatagataaagttcccttatttgtatgatctgttatgattactactgttttattattat
tatcactacctgtattggcaggtgctattactatacttttaacagatcgaaattttaata
catcattttttgatcctgctgggggaggagatcctattttatttcaacattta
>SMNKARA08247_Ozyptila_praticola_8y48E_48y97N_jv_f_A_Thomisidae
ctttatatttattatttggtgcttgatcagctatagttggtactgcaataagagttttaa
ttcgaatggaattgggtaatgtaggaagattattaggaaatgatcatttatataatgtgg
ttgttacagctcatgcttttgtaatgattttttttatagtaatgccaattttgattggag
gttttgggaattgattagttcctttaatattaggtgctcctgatatatcttttcctcgaa
taaataatttatctttttgacttcttcctccttcattatttttattatttatatcatcta
tagttgaaataggagtaggagcaggatggactgtttatcctcctttggcttctagtattg
gtcatataggaagatcaatggattttgctattttttctcttcatttagcgggtgcttctt
ctattataggggctgttaattttattactactattattaatatacgaacaattggaataa
gaatagaaaaggttcctttatttgtttgatcagtattaattacagctattttattgcttt
tatcattacctgttttagcaggggcgattacaatgttattaacagatcgaaattttaata
cttctttttttgaccctgctggtgggggggatcctattttgtttcaacattta
>SMNKARA08248_Dendryphantes_rudis_8y58E_48y89N_ad_f_A_Salticidae
caatatatttaatttttggagcttggtcagctatagttggaactgctataagaattttaa
ttcgaatggagttaggacaaactggatcatttataggaaatgatcatatatataatgtaa
ttgtaactgctcatgcttttgttataattttttttatagtaatacctatattaattggag
gatttggaaattgattagttcctttaatattaggagctcctgatatagcttttcctcgta
taaataacttaagattctgattacttcctccttctttatttttattatttatttcttcta
tagttgaaataggagtaggagctggatgaactgtatatcctcctttagcctcaattgtag
gacataatggaagatcagtggattttgctattttttcattacatttagcaggtgcttctt
caattataggagctattaattttatttctacgattattaatatacgatctttaggtatat
cattggataaagttcctttgtttgtttgatctgttataattactgcagttttattattat
tatcattgccagtattagcgggagctattactatattattaactgatcgaaattttaata
cctctttttttgatcctgcaggaggtggagatcctattttgtttcagcattta
>SMNKARA08250_Tenuiphantes_tenuis_8y48E_48y97N_jv_f_A_Linyphiidae
ctttatattttatttttggagcgtgagctgctatagtaggaactgctataagagtattga
ttcgaattgagttgggtcaaactgggagaatattgggagatgatcagttatataatgtta
ttgtcactgcacatgcttttgttatgattttttttatagttatacccattttaattgggg
gatttggaaattggttagttcctttgatacttggggcacctgatatagcttttcctcgaa
taaataatttaagtttttgacttttacccccttctttgttattactatttatttcaagta
tggttgagataggagttggggcagggtgaacagtgtatcctcctcttgcttctttggaag
gtcatgcaggaagttctgtggactttgctattttttctcttcatttagctggggcttctt
ctattataggagcaattaattttatttctactattttgaatatacgagggtatggggtat
ctatagaaaaagtaccattgtttgtttgatccgtgttaattactgctgttctcttattat
tatcactacctgttttagcaggtgctattacaatacttttaactgatcgaaattttaata
cttcattttttgaccctgcaggagggggagatccagtattattccaacattta
>SMNKARA08252_Styloctetor_romanus_8y19E_48y83N_ad_f_A_Linyphiidae
gtttatattttatttttggagcttgggctgctatagtaggaacagcaataagagtattaa
ttcgaattgagttaggacaaactggaagattgttaggggatgatcaattatataatgtta
ttgttacagctcatgcttttgttatgattttttttatagttatacctattttaattggtg
gttttggaaattggttagttcctttaatattgggagctcctgatatagcttttcctcgaa
taaataatttgagattttgacttttacccccttctttgttattattattcatttctagaa
tagatgaaataggagtaggggcagggtgaactgtttatccccctcttgcttccttagaag
gtcattctggaagatcagtagattttgctattttttctttacatttagcaggggcttctt
cgattataggagctattaattttatttctactattattaatatacgaggttatggtatat
ctatggaaaaagttcctttatttgtttgatctgtattaattactgctattttattacttt
tatctttacctgtattagcaggggctattactatacttttaacagatcgaaattttaata
cgtcttttttcgatccgtcaggtggaggagatccagtattattccaacattta
>SMNKARA08253_Styloctetor_romanus_8y19E_48y83N_ad_m_A_Linyphiidae
gtttatattttatttttggagcttgggctgctatagtaggaacagcaataagagtattaa
ttcgaattgagttaggacaaactggaagattgttaggggatgatcaattatataatgtta
ttgttacagctcatgcttttgttatgattttttttatagttatacctattttaattggtg
gttttggaaattggttagttcctttaatattgggagctcctgatatagcttttcctcgaa
taaataatttgagattttgacttttacccccttctttgttattattattcatttctagaa
tagatgaaataggagtaggggcagggtgaactgtttatccccctcttgcttccttagaag
gtcattctggaagatcagtagattttgctattttttctttacatttagcaggggcttctt
cgattataggagctattaattttatttctactattattaatatacgaggttatggtatat
ctatggaaaaagttcctttatttgtttgatctgtattaattactgctattttattacttt
tatctttacctgtattagcaggggctattactatacttttaacagatcgaaattttaata
cgtcttttttcgatccgtcaggtggaggagatccagtattattccaacattta
>SMNKARA08254_Styloctetor_romanus_8y19E_48y83N_ad_m_A_Linyphiidae
gtttatattttatttttggagcttgggctgctatagtaggaacagcaataagagtattaa
ttcgaattgagttaggacaaactggaagattgttaggggatgatcaattatataatgtta
ttgttacagctcatgcttttgttatgattttttttatagttatacctattttaattggtg
gttttggaaattggttagttcctttaatattgggagctcctgatatagcttttcctcgaa
taaataatttgagattttgacttttacccccttctttgttattattattcatttctagaa
tagatgaaataggagtaggggcagggtgaactgtttatccccctcttgcttccttagaag
gtcattctggaagatcagtagattttgctattttttctttacatttagcaggggcttctt
cgattataggagctattaattttatttctactattattaatatacgaggttatggtatat
ctatggaaaaagttcctttatttgtttgatctgtattaattactgctattttattacttt
tatctttacctgtattagcaggggctattactatacttttaacagatcgaaattttaata
cgtcttttttcgatccgtcaggtggaggagatccagtattattccaacattta
>SMNKARA08255_Styloctetor_romanus_8y19E_48y83N_ad_f_A_Linyphiidae
gtttatattttatttttggagcttgggctgctatagtaggaacagcaataagagtattaa
ttcgaattgagttaggacaaactggaagattgttaggggatgatcaattatataatgtta
ttgttacagctcatgcttttgttatgattttctttatagttatacctattttaattggtg
gttttggaaattggttagttcctttaatattgggagctcctgatatagcttttcctcgaa
taaataatttgagattttgacttttacccccttctttgttattattattcatttctagaa
tggatgaaataggagtaggggcagggtgaactgtttatccccctcttgcttccttagaag
gtcattctggaagatcagtagattttgctattttttctttacatttagcaggggcttctt
cgattataggagctattaattttatttctactattattaatatacgaggttatggtatat
ctatggaaaaagttcctttatttgtttgatctgtattaattactgctattttattacttt
tatctttacctgtattagcaggggctattactatacttttaacagatcgaaattttaata
cgtcttttttcgatccgtcaggtggaggagatccagtattatttcaacattta
>SMNKARA08256_Styloctetor_romanus_8y19E_48y82N_ad_f_A_Linyphiidae
gtttatattttatttttggagcttgggctgctatagtaggaacagcaataagagtattaa
ttcgaattgagttaggacaaactggaagattgttaggggatgatcaattatataatgtta
ttgttacagctcatgcttttgttatgattttttttatagttatacctattttaattggtg
gttttggaaattggttagttcctttaatattgggagctcctgatatagcttttcctcgaa
taaataatttgagattttgacttttacccccttctttgttattattattcatttctagaa
tagatgaaataggagtaggggcagggtgaactgtttatccccctcttgcttccttagaag
gtcattctggaagatcagtagattttgctattttttctttacatttagcaggggcttctt
cgattataggagctattaattttatttctactattattaatatacgaggttatggtatat
ctatggaaaaagttcctttatttgtttgatctgtattaattactgctattttattacttt
tatctttacctgtattagcaggggctattactatacttttaacagatcgaaattttaata
cgtcttttttcgatccgtcaggtggaggagatccagtattattccaacattta
>SMNKARA08259_Asagena_phalerata_8y19E_48y83N_ad_m_A_Theridiidae
ctttatatttattatttggagcttgatctgctatggtaggtacagctataagagttttaa
ttcgggtggagttaggacaaccaggaaggttactaggagatgatcaattatataatgtta
ttgtaaccggtcatgcgtttattatgattttttttatagtaatgcctattttaattggag
gttttgggaattggttagttcctttaatattaggggctcctgatatagcttttcctcgaa
taaataatttaagtttttggttattacccccttctttaatacttttgtttatctcttcca
tggaagagataggagtaggagcaggatggactatttatcctcctttatcttctttagaag
gtcatagaggaagatctgtagattttgctattttttctttacatttagctggggcttctt
ctattataggggctattaattttatttctacaattttaaatatacgtttgtttgggataa
ctatagaaaaggttagattatttgtttggtctgtattgatcactgctgtattattattat
tatctttgcctgttttagcgggagctattaccatattacttactgatcgaaattttaata
cttctttttttgatcctgctggagggggggatcctattttatttcaacatttg
>SMNKARA08260_Asagena_phalerata_8y19E_48y83N_ad_m_A_Theridiidae
ctttatatttattatttggagcttgatctgctatagtaggtacagctataagagttttaa
ttcgggtggagttaggacaaccaggaaggttactaggggatgatcaattatataatgtta
ttgtaactggtcatgcgtttattatgattttttttatagtaatgcctattttaattggag
gttttgggaattggttagttcctttaatattaggggctcctgatatagcttttcctcgaa
taaataatttaagtttttggttattacccccttctttaatacttttgtttatctcttcca
tggaagagataggagtaggagcaggatggactatttatcctcctttatcttctttagaag
gtcatagaggaagatctgtagattttgctattttttctttacatttagctggggcttctt
ctattataggggctattaattttatttctacaattttaaatatacgtttgtttgggataa
ctatagaaaaggttagattatttgtttggtctgtattgatcactgctgtattattattgt
tatctttgcctgttttagcgggagctattaccatattacttactgatcgaaattttaata
cttctttttttgatcctgctggagggggggatcctattttatttcaacatttg
>SMNKARA08261_Asagena_phalerata_8y19E_48y82N_ad_m_A_Theridiidae
ctttatatttattatttggggcttgatctgctatagtaggcacagctataagagttttaa
ttcgggtggagttagggcaaccaggaaggttactaggagatgatcaattgtataatgtca
ttgtaaccggtcatgcgtttattatgattttctttatagtaatgcctattttaattggag
gttttggaaattggttagttcctttaatattaggggctcctgatatggcttttcctcgaa
taaataatttaagtttttgattattacctccttctttaatacttttgtttatttcttcta
tggaagagataggagtaggagcaggatggactatttatcctcctttatcttctttagaag
gtcatagaggaagatctgtagattttgctattttttctttacatttagctggggcttctt
ctattataggggctattaattttatttctacaattttaaatatacgtttgtttgggataa
ctatagaaaaggttagattgtttgtttggtctgtattgatcactgctgtattattattat
tatctttgcctgttttagcgggggctattaccatattacttactgatcgcaattttaata
cttctttttttgatcctgctggagggggggatcctattttatttcaacatttg
>SMNKARA08262_Asagena_phalerata_8y19E_48y82N_ad_m_A_Theridiidae
ctttatatttattatttggggcttgatctgctatagtaggcacagctataagagttttaa
ttcgggtggagttagggcaaccaggaaggttactaggagatgatcaattgtataatgtca
ttgtaaccggtcatgcgtttattatgattttctttatagtaatgcctattttaattggag
gttttggaaattggttagttcctttaatattaggggctcctgatatggcttttcctcgaa
taaataatttaagtttttgattattacctccttctttaatacttttgtttatctcttcta
tggaagagataggagtaggagcaggatggactatttatcctcctttatcttctttagaag
gtcatagaggaagatctgtagattttgctattttttctttacatttagctggggcttctt
ctattataggggctattaattttatttctacaattttaaatatacgtttgtttgggataa
ctatagaaaaggttagattgtttgtttggtctgtattgatcactgctgtattattattat
tatctttgcctgttttagcgggggctattaccatattacttactgatcgcaattttaata
cttctttttttgatcctgctggagggggggatcctattttatttcaacatttg
>SMNKARA08263_Asagena_phalerata_8y19E_48y82N_ad_m_A_Theridiidae
ctttatatttattatttggggcttgatctgctatagtaggcacagctataagagttttaa
ttcgggtggagttagggcaaccaggaaggttactaggagatgatcaattgtataatgtca
ttgtaaccggtcatgcgtttattatgattttctttatagtaatgcctattttaattggag
gttttggaaattggttagttcctttaatattaggggctcctgatatggcttttcctcgaa
taaataatttaagtttttgattattacctccttctttaatacttttgtttatctcttcta
tggaagagataggagtaggagcaggatggactatttatcctcctttatcttctttagaag
gtcatagaggaagatctgtagattttgctattttttctttacatttagctggggcttctt
ctattataggggctattaattttatttctacaattttaaatatacgtttgtttgggataa
ctatagaaaaggttagattgtttgtttggtctgtattgatcactgctgtattattattat
tatctttgcctgttttagcgggggctattaccatattacttactgatcgcaattttaata
cttctttttttgatcctgctggagggggggatcctattttatttcaacatttg
>SMNKARA08264_Asagena_phalerata_8y19E_48y83N_ad_m_A_Theridiidae
ctttatatttattatttggagcttgatctgctatagtaggtacagctataagagttttaa
ttcgggtggagttaggacaaccaggaaggttactaggggatgatcaattatataatgtta
ttgtaactggtcatgcgtttattatgattttttttatagtaatgcctattttaattggag
gttttgggaattggttagttcctttaatattaggggctcctgatatagcttttcctcgaa
taaataatttaagtttttggttattacccccttctttaatacttttgtttatctcttcca
tggaagagataggagtaggagcaggatggactatttatcctcctttatcttctttagaag
gtcatagaggaagatctgtagattttgctattttttctttacatttagctggggcttctt
ctattataggggctattaattttatttctacaattttaaatatacgtttgtttgggataa
ctatagaaaaggttagattatttgtttggtctgtattgatcactgctgtattattattgt
tatctttgcctgttttagcgggagctattaccatattacttactgatcgaaattttaata
cttctttttttgatcctgctggagggggggatcctattttatttcaacatttg
>SMNKARA08265_Asagena_phalerata_8y19E_48y83N_ad_m_A_Theridiidae
ctttatatttattatttggggcttgatctgctatagtaggcacagctataagagttttaa
ttcgggtggagttagggcaaccaggaaggttactaggagatgatcaattgtataatgtca
ttgtaaccggtcatgcgtttattatgattttctttatagtaatgcctattttaattggag
gttttggaaattggttagttcctttaatattaggggctcctgatatggcttttcctcgaa
taaataatttaagtttttgattattacctccttctttaatacttttgtttatctcttcta
tggaagagataggagtaggagcaggatggactatttatcctcctttatcttctttagaag
gtcatagaggaagatctgtagattttgctattttttctttacatttagctggggcttctt
ctattataggggctattaattttatttctacaattttaaatatacgtttgtttgggataa
ctatagaaaaggttagattgtttgtttggtctgtattgatcactgctgtattattattat
tatctttgcctgttttagcgggggctattaccatattacttactgatcgcaattttaata
cttctttttttgatcctgctggagggggggatcctattttatttcaacatttg
>SMNKARA08266_Steatoda_albomaculata_8y19E_48y83N_ad_m_A_Theridiidae
ctttatatttagtgtttggagcttgagctgctatggtagggactgctataagagtattaa
ttcgtgtagaattaggacagcctggaagattgttaggtgatgatcaattgtacaatgtaa
ttgtaactgggcatgcatttgttataattttttttatggttatacctattttgattggtg
ggtttgggaattgattagttcctttaatattaggagctcctgatatagcttttcctcgaa
tgaataatttgagattttgattacttcctccttctttgatattattattcatttcttcaa
tagaagaaatgggggtgggtgctggatgaactatttatcctcctttatcttctcttgaag
gtcatgggggtagatcagtagattttgcaattttttctttgcatttagctggggcttctt
caattataggtgctattaattttatttctacaattcttaatatgcggttatatggaataa
ctatagaaaaggtaagattgtttgtatgatctgtattaattactgctgtattattattat
tgtctcttcctgttttagcaggagctattactatattgttaactgatcgaaattttaata
cttcttttttcgaccctgctggaggtggagatcctattttatttcaacacttg
>SMNKARA08267_Steatoda_albomaculata_8y19E_48y83N_ad_m_A_Theridiidae
ctttatatttagtgtttggagcttgagctgctatggtagggactgctataagagtattaa
ttcgtgtagaattaggacagcctggaagattgttaggtgacgatcaattgtataatgtta
ttgtaactggacatgcatttgttataattttttttatagttatacctattttgattggtg
ggtttgggaattgattagttcctttaatgctaggggctcctgatatagcttttcctcgga
taaataatttgagattttgattacttcctccttctttgatgttattattcatttcttcaa
tagaagaaataggggtgggtgctggatgaactatttatcctcctttgtcttctcttgaag
gtcacgggggtagatcagtagattttgcaattttttctttgcatttagctggggcttctt
caattataggggctattaattttatttctacaattcttaatatacggttatatggaataa
ctatagaaaaggtaagattatttgtgtgatctgtattgattactgctgtattattattat
tgtctcttcctgttttagcaggagctattactatattgttaactgatcgaaattttaata
cttctttttttgatcctgctggaggtggagaccctattttatttcaacacttg
>SMNKARA08268_Steatoda_albomaculata_8y19E_48y83N_ad_m_A_Theridiidae
ctttatatttagtgtttggagcttgagctgctatggtagggactgctataagagtattaa
ttcgtgtagaattaggacagcctggaagattgttaggtgatgatcaattgtacaatgtaa
ttgtaactgggcatgcatttgttataattttttttatggttatacctattttgattggtg
ggtttgggaattgattagttcctttaatattaggagctcctgatatagcttttcctcgaa
tgaataatttgagattttgattacttcctccttctttgatattattattcatttcttcaa
tagaagaaatgggggtgggtgctggatgaactatttatcctcctttatcttctcttgaag
gtcatgggggtagatcagtagattttgcaattttttctttgcatttagctggggcttctt
caattataggtgctattaattttatttctacaattcttaatatgcggttatatggaataa
ctatagaaaaggtaagattgtttgtatgatctgtattaattactgctgtattattattat
tgtctcttcctgttttagcaggagctattactatattgttaactgatcgaaattttaata
cttcttttttcgaccctgctggaggtggagatcctattttatttcaacacttg
>SMNKARA08269_Steatoda_albomaculata_8y19E_48y82N_ad_m_A_Theridiidae
ctttatatttagtgtttggagcttgagctgctatggtagggactgctataagagtattaa
ttcgtgtagaattaggacagcctggaagattgttaggtgatgatcaattgtacaatgtaa
ttgtaactgggcatgcatttgttataattttttttatggttatacctattttgattggtg
ggtttgggaattgattagttcctttaatattaggagctcctgatatagcttttcctcgaa
tgaataatttgagattttgattacttcctccttctttgatattattattcatttcttcaa
tagaagaaatgggggtgggtgctggatgaactatttatcctcctttatcttctcttgaag
gtcatgggggtagatcagtagattttgcaattttttctttgcatttagctggggcttctt
caattataggtgctattaattttatttctacaattcttaatatgcggttatatggaataa
ctatagaaaaggtaagattgtttgtatgatctgtattaattactgctgtattattattat
tgtctcttcctgttttagcaggagctattactatattgttaactgatcgaaattttaata
cttcttttttcgaccctgctggaggtggagatcctattttatttcaacacttg
>SMNKARA08270_Steatoda_albomaculata_8y19E_48y82N_ad_m_A_Theridiidae
ctttatatttagtgtttggagcttgagctgctatggtagggactgctataagagtattaa
ttcgtgtagaattaggacagcctggaagattgttaggtgatgatcaattgtataatgtaa
ttgtaactgggcatgcatttgttataattttttttatggttatacctattttgattggtg
ggtttgggaattgattagttcctttaatattaggagctcctgatatagcttttcctcgaa
tgaataatttgagattttgattacttcctccttctttgatattattattcatttcttcaa
tagaagaaatgggggtgggtgctggatgaactatttatcctcctttatcttctcttgaag
gtcatgggggtagatcagtagattttgcaattttttctttgcatttagctggggcttctt
caattataggggctattaattttatttctacaattcttaatatgcggttatatggaataa
ctatggaaaaggtaagattgtttgtatgatctgtattaattactgctgtattattgttat
tgtctcttcctgttttagcaggagctatcactatattgttaactgatcgaaattttaata
cttcttttttcgaccctgctggaggtggagatcctattttatttcaacacttg
>SMNKARA08271_Euryopis_quinqueguttata_8y66E_49y33N_ad_f_A_Theridiidae
ctttatatttattatttggtgggtgagctgcaataataggaacaggtataagagttttaa
ttcgaattgaattaggtcaacctggaagatttttaggggatgatcaattatataatgtag
tggttacttctcatgcttttgtaataattttttttatagttatacctattttaattggtg
gatttgggaattgattagttcctttaatattaggggctcctgatatagcgtttcctcgaa
taaataatttaagattttgattacttcctttttctttaatattattattgatttcttctt
tagttgaagtaggagttggagcaggatgaactatttatcctcctttatcatcattagaag
gtcattttggtagttctgtggattttgctattttttctttgcatttggctggggcttctt
ctattataggagctattaattttatttctactgtaataaatatacgatcttatggaataa
gatttgaaaaaatttctttatttgtttgatctgtagtaattacggctgtattattacttt
tatcattaccagttttagcaggtgctattactatattattaacagatcggaattttaata
cttcattttttgatcctgctggtggtggggatcctattttatttcagcattta
>SMNKARA08272_Euryopis_quinqueguttata_8y66E_49y33N_ad_f_A_Theridiidae
ctttatatttattatttggtgggtgagctgcaataataggaacaggtataagagttttaa
ttcgaattgaattaggtcaacctggaagatttttaggggatgatcaattatataatgtag
tggttacttctcatgcttttgtaataattttttttatagttatacctattttaattggtg
gatttgggaattgattagttcctttaatattaggggctcctgatatagcgtttcctcgaa
taaataatttaagattttgattacttcctttttctttaatattattattgatttcttctt
tagttgaagtaggagttggagcaggatgaactatttatcctcctttatcatcattagaag
gtcattttggtagttctgtggattttgctattttttctttgcatttggctggggcttctt
ctattataggagctattaattttatttctactgtaataaatatacgatcttatggaataa
gatttgaaaaaatttctttatttgtttgatctgtagtaattacggctgtattattacttt
tatcattaccagttttagcaggtgctattactatattattaacagatcggaattttaata
cttcattttttgatcctgctggtggtggggatcctattttatttcagcattta
>SMNKARA08273_Euryopis_quinqueguttata_8y66E_49y33N_ad_f_A_Theridiidae
ctttatatttattatttggtgggtgagctgcaataataggaacaggtataagagttttaa
ttcgaattgaattaggtcaacctggaagatttttaggggatgatcaattatataatgtag
tggttacttctcatgcttttgtaataattttttttatagttatacctattttaattggtg
gatttgggaattgattagttcctttaatattaggggctcctgatatagcgtttcctcgaa
taaataatttaagattttgattacttcctttttctttaatattattattgatttcttctt
tagttgaagtaggagttggagcaggatgaactatttatcctcctttatcatcattagaag
gtcattttggtagttctgtggattttgctattttttctttgcatttggctggggcttctt
ctattataggagctattaattttatttctactgtaataaatatacgatcttatggaataa
gatttgaaaaaatttctttatttgtttgatctgtagtaattacggctgtattattacttt
tatcattaccagttttagcaggtgctattactatattattaacagatcggaattttaata
cttcattttttgatcctgctggtggtggggatcctattttatttcagcattta
>SMNKARA08274_Aelurillus_vinsignitus_8y19E_48y83N_ad_m_A_Salticidae
ctttatatttaatttttggagcatgatctgccatggtaggaacagcaataagagtattaa
ttcgaatagaattaggacagacaggtagctttttaggtaatgatcatatatataatgtta
ttgtaactgctcatgcttttgtaatgattttttttatagtaataccaattataattggtg
gttttggaaattgattagttcctttgatgttgggagctcctgatatagctttccctcgaa
taaataacttaagattttgattattgcctccctctttatttttattatttatgtcatcta
tagtagagataggggttggagctgggtgaactgtttatcctcctttggcttctattgttg
gtcacaatggtagatctgtagattttgcaattttttctttacatttagctggagcttctt
caattataggagctattaattttatttctactgtagttaatatgcgatctgtggggataa
gtctagataaggttcctttatttgtatgatctgttgttattacggctgttctattattat
tatctttgcctgtgttagccggtgctattactatactattaacagatcgtaattttaata
catctttttttgaccctgctggagggggagaccctattttgtttcaacacttg
>SMNKARA08275_Aelurillus_vinsignitus_8y19E_48y83N_ad_m_A_Salticidae
ctttatatttaatttttggagcatgatctgccatggtaggaacagcaataagagtattga
ttcgaatagaattaggacagacaggtagttttttaggtaatgatcatatatataatgtta
ttgtaactgctcatgcttttgtaatgattttttttatagtaataccaattataattggtg
gttttggaaattgattagttcctttgatgttgggagctcctgatatagctttccctcgaa
taaataacttaagattttgattattgcctccctctttatttttattatttatatcatcta
tagtagagataggggttggagctgggtgaactgtttatcctcctttggcttctattgttg
gtcataatggtagatctgtagattttgcaattttttctttacatttagctggagcttctt
caattataggagctattaattttatttctactgtagttaatatgcgatctgtagggataa
gtctagataagattcctttatttgtatgatctgttgttattacggctgttctattattat
tatctttgcctgtgttagccggtgctattactatactattaacagatcgtaattttaata
catctttttttgaccctgctggagggggagaccctattttgtttcaacacttg
>SMNKARA08276_Aelurillus_vinsignitus_8y19E_48y82N_ad_m_A_Salticidae
ctttatatttaatttttggagcatgatctgccatggtaggaacagcaataagagtattga
ttcgaatagaattaggacagacaggtagctttttaggtaatgatcatatatataatgtta
ttgtaactgctcatgcttttgtaatgattttttttatagtaataccaattataattggtg
gttttggaaattgattagttcctttgatgttgggagctcctgatatagccttccctcgaa
taaataacttaagattttgattattgcctccctctttatttttattatttatgtcatcta
tagtagagataggggttggagctggatgaactatttatcctcctttggctgctattgttg
gtcacaatggtagatctatagattttgcaattttttctttacatttagctggaatttctt
caattataggagctattaattttatttctactgtagttaatatgcgatctgtggggataa
gtctagataaggttcctttatttgtatgatctgttgttattacggccgttctattattat
tatctttacctgtgttagcaggtgctattactatactattaacagatcgtaattttaata
catctttttttgatcctgctggagggggagatcctattttgtttcaacacttg
>SMNKARA08278_Sitticus_saltator_8y38E_49y03N_ad_f_A_Salticidae
cattatatttaatttttggtgcttggtctgctatagtaggaacagcaataagaattttaa
ttcgtatggaattaggacaaactggtcattttttaggaaatgatcatttgtataatgtaa
ttgttactgctcatgcttttgtaatgattttttttatagttatacctatcctaattggag
ggtttggtaattgattggttcctctaatattaggagctcctgacatagcttttcctcgta
taaataatttgagattttgattattacctccttcattatttttattatttatttcttcta
tggctgaaataggggtaggagcgggttgaactgtataccctcctttggcttctattgttg
gacataatggtagttctgtagattttgctattttttctttacatttggctggagcttcgt
ctattataggtgctattaattttatttcaactgttattaatatgcgttctgtaggaatat
caatagataaaatccctttatttgtatgatctgttgtaattactgctgttttgttattat
tgtctttaccagtattagctggtgctattactatattattaactgatcgtaattttaata
cttctttctttgatcctgctggaggtggggatcctattttatttcaacattta
>SMNKARA08279_Sitticus_saltator_8y38E_49y03N_ad_f_A_Salticidae
cattatatttaatttttggtgcttggtctgctatagtaggaacagcaataagaattttaa
ttcgtatggaattaggacaaactggtcattttttaggaaatgatcatttgtataatgtaa
ttgttactgctcatgcttttgtaatgattttttttatagttatacctatcctaattggag
ggtttggtaattgattggttcctctaatattaggagctcctgacatagcttttcctcgta
taaataatttgagattttgattattacctccttcattatttttattatttatttcttcta
tggctgaaataggggtaggagcgggttgaactgtataccctcctttggcttctattgttg
gacataatggtagttctgtagattttgctattttttctttacatttggctggagcttcgt
ctattataggtgctattaattttatttcaactgttattaatatgcgttctgtaggaatat
caatagataaaatccctttatttgtatgatctgttgtaattactgctgttttgttattat
tgtctttaccagtattagctggtgctattactatattattaactgatcgtaattttaata
cttctttctttgatcctgctggaggtggggatcctattttatttcaacattta
>SMNKARA08280_Sitticus_saltator_8y38E_49y03N_ad_f_A_Salticidae
cattatatttaatttttggtgcttggtctgctatagtaggaacagcaataagaattttaa
ttcgtatggaattaggacaaactggtcattttttaggaaatgatcatttgtataatgtaa
ttgttactgctcatgcttttgtaatgattttttttatagttatacctatcctaattggag
ggtttggtaattgattggttcctctaatattaggagctcctgacatagcttttcctcgta
taaataatttgagattttgattattacctccttcattatttttattatttatttcttcta
tggctgaaataggggtaggagcgggttgaactgtataccctcctttggcttctattgttg
gacataatggtagttctgtagattttgctattttttctttacatttggctggagcttcgt
ctattataggtgctattaattttatttcaactgttattaatatgcgttctgtaggaatat
caatagataaaatccctttatttgtatgatctgttgtaattactgctgttttgttattat
tgtctttaccagtattagctggtgctattactatattattaactgatcgtaattttaata
cttctttctttgatcctgctggaggtggggatcctattttatttcaacattta
>SMNKARA08281_Sitticus_saltator_8y38E_49y03N_ad_f_A_Salticidae
cattatatttaatttttggtgcttggtctgctatagtaggaacagcaataagaattttaa
ttcgtatggaattaggacaaactggtcattttttaggaaatgatcatttgtataatgtaa
ttgttactgctcatgcttttgtaatgattttttttatagttatacctatcctaattggag
ggtttggtaattgattggttcctctaatattaggagctcctgacatagcttttcctcgta
taaataatttgagattttgattattacctccttcattatttttattatttatttcttcta
tggctgaaataggggtaggagcgggttgaactgtataccctcctttggcttctattgttg
gacataatggtagttctgtagattttgctattttttctttacatttggctggagcttcgt
ctattataggtgctattaattttatttcaactgttattaatatgcgttctgtaggaatat
caatagataaaatccctttatttgtatgatctgttgtaattactgctgttttgttattat
tgtctttaccagtattagctggtgctattactatattattaactgatcgtaattttaata
cttctttctttgatcctgctggaggtggggatcctattttatttcaacattta
>SMNKARA08282_Sitticus_saltator_8y38E_49y03N_ad_f_A_Salticidae
cattatatttaatttttggtgcttggtctgctatagtaggaacagcaataagaattttaa
ttcgtatggaattaggacaaactggtcattttttaggaaatgatcatttgtataatgtaa
ttgttactgctcatgcttttgtaatgattttttttatagttatacctatcctaattggag
ggtttggtaattgattggttcctctaatattaggagctcctgacatagcttttcctcgta
taaataatttgagattttgattattacctccttcattatttttattatttatttcttcta
tggctgaaataggggtaggagcgggttgaactgtataccctcctttggcttctattgttg
gacataatggtagttctgtagattttgctattttttctttacatttggctggagcttcgt
ctattataggtgctattaattttatttcaactgttattaatatgcgttctgtaggaatat
caatagataaaatccctttatttgtatgatctgttgtaattactgctgttttgttattat
tgtctttaccagtattagctggtgctattactatattattaactgatcgtaattttaata
cttctttctttgatcctgctggaggtggggatcctattttatttcaacattta
>SMNKARA08284_Sitticus_saltator_8y38E_49y03N_ad_m_A_Salticidae
cattatatttaatttttggtgcttggtctgctatagtaggaacagcaataagaattttaa
ttcgtatggaattaggacaaactggtcattttttaggaaatgatcatttgtataatgtaa
ttgttactgctcatgcttttgtaatgattttttttatagttatacctatcctaattggag
ggtttggtaattgattggttcctctaatattaggagctcctgacatagcttttcctcgta
taaataatttgagattttgattattacctccttcattatttttattatttatttcttcta
tggctgaaataggggtaggagcgggttgaactgtataccctcctttggcttctattgttg
gacataatggtagttctgtagattttgctattttttctttacatttggctggagcttcgt
ctattataggtgctattaattttatttcaactgttattaatatgcgttctgtaggaatat
caatagataaaatccctttatttgtatgatctgttgtaattactgctgttttgttattat
tgtctttaccagtattagctggtgctattactatattattaactgatcgtaattttaata
cttctttctttgatcctgctggaggtggggatcctattttatttcaacattta
>SMNKARA08286_Sitticus_saltator_8y38E_49y03N_ad_f_A_Salticidae
cattatatttaatttttggtgcttggtctgctatagtaggaacagcaataagaattttaa
ttcgtatggaattaggacaaactggtcattttttaggaaatgatcatttgtataatgtaa
ttgttactgctcatgcttttgtaatgattttttttatagttatacctatcctaattggag
ggtttggtaattgattggttcctctaatattaggagctcctgacatagcttttcctcgta
taaataatttgagattttgattattacctccttcattatttttattatttatttcttcta
tggctgaaataggggtaggagcgggttgaactgtataccctcctttggcttctattgttg
gacataatggtagttctgtagattttgctattttttctttacatttggctggagcttcgt
ctattataggtgctattaattttatttcaactgttattaatatgcgttctgtaggaatat
caatagataaaatccctttatttgtatgatctgttgtaattactgctgttttgttattat
tgtctttaccagtattagctggtgctattactatattattaactgatcgtaattttaata
cttctttctttgatcctgctggaggtggggatcctattttatttcaacattta
>SMNKARA08287_Sitticus_saltator_8y38E_49y03N_ad_f_A_Salticidae
cattatatttaatttttggtgcttggtctgctatagtaggaacagcaataagaattttaa
ttcgtatggaattaggacaaactggtcattttttaggaaatgatcatttgtataatgtaa
ttgttactgctcatgcttttgtaatgattttttttatagttatacctatcctaattggag
ggtttggtaattgattggttcctctaatattaggagctcctgacatagcttttcctcgta
taaataatttgagattttgattattacctccttcattatttttattatttatttcttcta
tggctgaaataggggtaggagcgggttgaactgtataccctcctttggcttctattgttg
gacataatggtagttctgtagattttgctattttttctttacatttggctggagcttcgt
ctattataggtgctattaattttatttcaactgttattaatatgcgttctgtaggaatat
caatagataaaatccctttatttgtatgatctgttgtaattactgctgttttgttattat
tgtctttaccagtattagctggtgctattactatattattaactgatcgtaattttaata
cttctttctttgatcctgctggaggtggggatcctattttatttcaacattta
>SMNKARA08288_Sitticus_saltator_8y19E_48y83N_ad_f_A_Salticidae
cattatatttaatttttggtgcttggtctgctatagtaggaacagcaataagaattttaa
ttcgtatggaattaggacaaactggtcattttttaggaaatgatcatttgtataatgtaa
ttgttactgctcatgcttttgtaatgattttttttatagttatacctatcctaattggag
ggtttggtaattgattggttcctctaatattaggagctcctgacatagcttttcctcgta
taaataatttgagattttgattattacctccttcattatttttattatttatttcttcta
tggctgaaataggggtaggagcgggttgaactgtataccctcctttggcttctattgttg
gacataatggtagttctgtagattttgctattttttctttacatttggctggagcttcgt
ctattataggtgctattaattttatttcaactgttattaatatgcgttctgtaggaatat
caatagataaaatccctttatttgtatgatctgttgtaattactgctgttttgttattat
tgtctttaccagtattagctggtgctattactatattattaactgatcgtaattttaata
cttctttctttgatcctgctggaggtggggatcctattttatttcaacattta
>SMNKARA08289_Titanoeca_psammophila_8y66E_49y33N_ad_m_A_Titanoecidae
ctttgtatttaatttttgggtcttgggctgctatagtaggtactgcaataagagtgttga
ttcgggttgaattaggttctcctgggagatttttaggagatgatcatttatataatgtta
ttgtaactgctcatgcgtttgttatgattttttttatggtgatacctattttaattggag
ggtttggaaattgattagtacctttaatgttaggagcgcctgatatagcttttcctcgaa
taaataatttgagattttgattattgcctccttctttaataatattatttatttcttcta
tagttgaaatgggagtaggggctggttggactgtataccctcctttggctggaagattgg
gtcattttggggtatctgtagattttgctattttttctttacatttagctggggcttctt
caattataggggctattaattttatttctactattattaatatacggttaatagggataa
ctatagaaaaagtacctttatttgtatggtctgttttaattactgctgtgttgttattgt
tatctttacctgttttagctggggctattactatattattaactgatcggaattttaata
cctcgttttttgatcccgcaggaggaggtgatcctattttatttcaacattta
>SMNKARA08290_Titanoeca_psammophila_8y66E_49y33N_ad_m_A_Titanoecidae
ctttgtatttaatttttgggtcttgggctgctatagtaggtactgcaataagagtgttga
ttcgggttgaattaggttctcctgggagatttttaggagatgatcatttatataatgtta
ttgtaactgctcatgcgtttgttatgattttttttatggtgatacctattttaattggag
ggtttggaaattgattagtacctttaatgttaggagcgcctgatatagcttttcctcgaa
taaataatttgagattttgattattgcctccttctttaataatattatttatttcttcta
tagttgaaatgggagtaggggctggttggactgtataccctcctttggctggaagattgg
gtcattttggggtatctgtagattttgctattttttctttacatttagctggggcttctt
caattataggggctattaattttatttctactattattaatatacggttaatagggataa
ctatagaaaaagtacctttatttgtatggtctgttttaattactgctgtgttgttattgt
tatctttacctgttttagctggggctattactatattattaactgatcggaattttaata
cctcgttttttgatcccgcaggaggaggtgatcctattttatttcaacattta
>SMNKARA08291_Titanoeca_psammophila_8y66E_49y33N_ad_m_A_Titanoecidae
ctttgtatttaatttttgggtcttgggctgctatagtaggtactgcaataagagtgttga
ttcgggttgaattaggttctcctgggagatttttaggagatgatcatttatataatgtta
ttgtaactgctcatgcgtttgttatgattttttttatggtgatacctattttaattggag
ggtttggaaattgattagtacctttaatgttaggagcgcctgatatagcttttcctcgaa
taaataatttgagattttgattattgcctccttctttaataatattatttatttcttcta
tagttgaaatgggagtaggggctggttggactgtataccctcctttggctggaagattgg
gtcattttggggtatctgtagattttgctattttttctttacatttagctggggcttctt
caattataggggctattaattttatttctactattattaatatacggttaatagggataa
ctatagaaaaagtacctttatttgtatggtctgttttaattactgctgtgttgttattgt
tatctttacctgttttagctggggctattactatattattaactgatcggaattttaata
cctcgttttttgatcccgcaggaggaggtgatcctattttatttcaacattta
>SMNKARA08292_Titanoeca_psammophila_8y66E_49y33N_ad_m_A_Titanoecidae
ctttgtatttaatttttgggtcttgggctgctatagtaggtactgcaataagagtgttga
ttcgggttgaattaggttctcctgggagatttttaggagatgatcatttatataatgtta
ttgtaactgctcatgcgtttgttatgattttttttatggtgatacctattttaattggag
ggtttggaaattgattagtacctttaatgttaggagcgcctgatatagcttttcctcgaa
taaataatttgagattttgattattgcctccttctttaataatattatttatttcttcta
tagttgaaatgggagtaggggctggttggactgtataccctcctttggctggaagattgg
gtcattttggggtatctgtagattttgctattttttctttacatttagctggggcttctt
caattataggggctattaattttatttctactattattaatatacggttaatagggataa
ctatagaaaaagtacctttatttgtatggtctgttttaattactgctgtgttgttattgt
tatctttacctgttttagctggggctattactatattattaactgatcggaattttaata
cctcgttttttgatcccgcaggaggaggtgatcctattttatttcaacattta
>SMNKARA08293_Titanoeca_psammophila_8y66E_49y33N_ad_m_A_Titanoecidae
ctttgtatttaatttttgggtcttgggctgctatagtaggtactgcaataagagtgttga
ttcgggttgaattaggttctcctgggagatttttaggagatgatcatttatataatgtta
ttgtaactgctcatgcgtttgttatgattttttttatggtgatacctattttaattggag
ggtttggaaattgattagtacctttaatgttaggagcgcctgatatagcttttcctcgaa
taaataatttgagattttgattattgcctccttctttaataatattatttatttcttcta
tagttgaaatgggagtaggggctggttggactgtataccctcctttggctggaagattgg
gtcattttggggtatctgtagattttgctattttttctttacatttagctggggcttctt
caattataggggctattaattttatttctactattattaatatacggttaatagggataa
ctatagaaaaagtacctttatttgtatggtctgttttaattactgctgtgttgttattgt
tatctttacctgttttagctggggctattactatattattaactgatcggaattttaata
cctcgttttttgatcccgcaggaggaggtgatcctattttatttcaacattta
>SMNKARA08294_Titanoeca_psammophila_8y66E_49y33N_ad_m_A_Titanoecidae
ctttgtatttaatttttgggtcttgggctgctatagtaggtactgcaataagagtgttga
ttcgggttgaattaggttctcctgggagatttttaggagatgatcatttatataatgtta
ttgtaactgctcatgcgtttgttatgattttttttatggtgatacctattttaattggag
ggtttggaaattgattagtacctttaatgttaggagcgcctgatatagcttttcctcgaa
taaataatttgagattttgattattgcctccttctttaataatattatttatttcttcta
tagttgaaatgggagtaggggctggttggactgtataccctcctttggctggaagattgg
gtcattttggggtatctgtagattttgctattttttctttacatttagctggggcttctt
caattataggggctattaattttatttctactattattaatatacggttaatagggataa
ctatagaaaaagtacctttatttgtatggtctgttttaattactgctgtgttgttattgt
tatctttacctgttttagctggggctattactatattattaactgatcggaattttaata
cctcgttttttgatcccgcaggaggaggtgatcctattttatttcaacattta
>SMNKARA08295_Titanoeca_psammophila_8y66E_49y33N_ad_m_A_Titanoecidae
ctttgtatttaatttttgggtcttgggctgctatagtaggtactgcaataagagtgttga
ttcgggttgaattaggttctcctgggagatttttaggagatgatcatttatataatgtta
ttgtaactgctcatgcgtttgttatgattttttttatggtgatacctattttaattggag
ggtttggaaattgattagtacctttaatgttaggagcgcctgatatagcttttcctcgaa
taaataatttgagattttgattattgcctccttctttaataatattatttatttcttcta
tagttgaaatgggagtaggggctggttggactgtataccctcctttggctggaagattgg
gtcattttggggtatctgtagattttgctattttttctttacatttagctggggcttctt
caattataggggctattaattttatttctactattattaatatacggttaatagggataa
ctatagaaaaagtacctttatttgtatggtctgttttaattactgctgtgttgttattgt
tatctttacctgttttagctggggctattactatattattaactgatcggaattttaata
cctcgttttttgatcccgcaggaggaggtgatcctattttatttcaacattta
>SMNKARA08296_Titanoeca_psammophila_8y66E_49y33N_ad_m_A_Titanoecidae
ctttgtatttaatttttgggtcttgggctgctatagtaggtactgcaataagagtgttga
ttcgggttgaattaggttctcctgggagatttttaggagatgatcatttatataatgtta
ttgtaactgctcatgcgtttgttatgattttttttatggtgatacctattttaattggag
ggtttggaaattgattagtacctttaatgttaggagcgcctgatatagcttttcctcgaa
taaataatttgagattttgattattgcctccttctttaataatattatttatttcttcta
tagttgaaatgggagtaggggctggttggactgtataccctcctttggctggaagattgg
gtcattttggggtatctgtagattttgctattttttctttacatttagctggggcttctt
caattataggggctattaattttatttctactattattaatatacggttaatagggataa
ctatagaaaaagtacctttatttgtatggtctgttttaattactgctgtgttgttattgt
tatctttacctgttttagctggggctattactatattattaactgatcggaattttaata
cctcgttttttgatcccgcaggaggaggtgatcctattttatttcaacattta
>SMNKARA08297_Titanoeca_psammophila_8y66E_49y33N_ad_m_A_Titanoecidae
ctttgtatttaatttttgggtcttgggctgctatagtaggtactgcaataagagtgttga
ttcgggttgaattaggttctcctgggagatttttaggagatgatcatttatataatgtta
ttgtaactgctcatgcgtttgttatgattttttttatggtgatacctattttaattggag
ggtttggaaattgattagtacctttaatgttaggagcgcctgatatagcttttcctcgaa
taaataatttgagattttgattattgcctccttctttaataatattatttatttcttcta
tagttgaaatgggagtaggggctggttggactgtataccctcctttggctggaagattgg
gtcattttggggtatctgtagattttgctattttttctttacatttagctggggcttctt
caattataggggctattaattttatttctactattattaatatacggttaatagggataa
ctatagaaaaagtacctttatttgtatggtctgttttaattactgctgtgttgttattgt
tatctttacctgttttagctggggctattactatattattaactgatcggaattttaata
cctcgttttttgatcccgcaggaggaggtgatcctattttatttcaacattta
>SMNKARA08298_Titanoeca_psammophila_8y66E_49y33N_ad_m_A_Titanoecidae
ctttgtatttaatttttgggtcttgggctgctatagtaggtactgcaataagagtgttga
ttcgggttgaattaggttctcctgggagatttttaggagatgatcatttatataatgtta
ttgtaactgctcatgcgtttgttatgattttttttatggtgatacctattttaattggag
ggtttggaaattgattagtacctttaatgttaggagcgcctgatatagcttttcctcgaa
taaataatttgagattttgattattgcctccttctttaataatattatttatttcttcta
tagttgaaatgggagtaggggctggttggactgtataccctcctttggctggaagattgg
gtcattttggggtatctgtagattttgctattttttctttacatttagctggggcttctt
caattataggggctattaattttatttctactattattaatatacggttaatagggataa
ctatagaaaaagtacctttatttgtatggtctgttttaattactgctgtgttgttattgt
tatctttacctgttttagctggggctattactatattattaactgatcggaattttaata
cctcgttttttgatcccgcaggaggaggtgatcctattttatttcaacattta
>SMNKARA08299_Titanoeca_psammophila_8y66E_49y33N_ad_m_A_Titanoecidae
ctttgtatttaatttttgggtcttgggctgctatagtaggtactgcaataagagtgttga
ttcgggttgaattaggttctcctgggagatttttaggagatgatcatttatataatgtta
ttgtaactgctcatgcgtttgttatgattttttttatggtgatacctattttaattggag
ggtttggaaattgattagtacctttaatgttaggagcgcctgatatagcttttcctcgaa
taaataatttgagattttgattattgcctccttctttaataatattatttatttcttcta
tagttgaaatgggagtaggggctggttggactgtataccctcctttggctggaagattgg
gtcattttggggtatctgtagattttgctattttttctttacatttagctggggcttctt
caattataggggctattaattttatttctactattattaatatacggttaatagggataa
ctatagaaaaagtacctttatttgtatggtctgttttaattactgctgtgttgttattgt
tatctttacctgttttagctggggctattactatattattaactgatcggaattttaata
cctcgttttttgatcccgcaggaggaggtgatcctattttatttcaacattta
>SMNKARA08300_Titanoeca_psammophila_8y66E_49y33N_ad_m_A_Titanoecidae
ctttgtatttaatttttgggtcttgggctgctatagtaggtactgcaataagagtgttga
ttcgggttgaattaggttctcctgggagatttttaggagatgatcatttatataatgtta
ttgtaactgctcatgcgtttgttatgattttttttatggtgatacctattttaattggag
ggtttggaaattgattagtacctttaatgttaggagcgcctgatatagcttttcctcgaa
taaataatttgagattttgattattgcctccttctttaataatattatttatttcttcta
tagttgaaatgggagtaggggctggttggactgtataccctcctttggctggaagattgg
gtcattttggggtatctgtagattttgctattttttctttacatttagctggggcttctt
caattataggggctattaattttatttctactattattaatatacggttaatagggataa
ctatagaaaaagtacctttatttgtatggtctgttttaattactgctgtgttgttattgt
tatctttacctgttttagctggggctattactatattattaactgatcggaattttaata
cctcgttttttgatcccgcaggaggaggtgatcctattttatttcaacattta
>SMNKARA08301_Titanoeca_psammophila_8y66E_49y33N_ad_m_A_Titanoecidae
ctttgtatttaatttttgggtcttgggctgctatagtaggtactgcaataagagtgttga
ttcgggttgaattaggttctcctgggagatttttaggagatgatcatttatataatgtta
ttgtaactgctcatgcgtttgttatgattttttttatggtgatacctattttaattggag
ggtttggaaattgattagtacctttaatgttaggagcgcctgatatagcttttcctcgaa
taaataatttgagattttgattattgcctccttctttaataatattatttatttcttcta
tagttgaaatgggagtaggggctggttggactgtataccctcctttggctggaagattgg
gtcattttggggtatctgtagattttgctattttttctttacatttagctggggcttctt
caattataggggctattaattttatttctactattattaatatacggttaatagggataa
ctatagaaaaagtacctttatttgtatggtctgttttaattactgctgtgttgttattgt
tatctttacctgttttagctggggctattactatattattaactgatcggaattttaata
cctcgttttttgatcccgcaggaggaggtgatcctattttatttcaacattta
>SMNKARA08302_Zodarion_italicum_8y19E_48y83N_ad_m_A_Zodariidae
cattgtatttaatttttggtgcttgatctgcaataataggaacagcaataagagtattga
ttcggagagagttgggtcaatctggtggtttgattggagatgatcaaatttataatgtaa
ttgttactgcccatgcgtttgtaataattttttttatagtaatacctattctgattggag
gatttggaaattggttagttcctttaatattaggtgctcctgatatagcttttcctcgaa
taaataatttaagattttgattattacctccttcattaatattgttaatgatttcttcta
tagtagaagtaggtgtaggggcagggtgaactatttaccctcctttggcttcattagttg
gacatataggaagatcagtagattttgctattttttctttacatttagctggagcttcat
caattataggtgctattaattttattactactattataaatatacgttcgtgtggaataa
gaatagaaaaagttcctttatttgtatgatcagtgttaattactgctgtattattattat
tatctttacctgtgttagcaggtgctattactatgttattaacagatcgaaattttaata
cttcattttttgaccctgctggagggggggatcctattttatttcaacattta
>SMNKARA08303_Zodarion_rubidum_8y66E_49y33N_ad_m_A_Zodariidae
ctttatatttaatttttggagcttggtcagctatagtaggtacagcaataagagtaataa
ttcggggggaattaggtcaatctgggagatttattggtgatgatcaattatataatgtta
ttgtgacggctcatgcttttgtaatgattttttttatagttataccaattttaattggtg
gatttggaaattgattagttccattaatattaggggctcctgatatagcatttcctcgta
taaataatttgagtttttggcttttacctccttctttaatattgttatttatttcatcta
taatggagatgggagtaggggctggatgaactatttatcctcctttggcttcgttgactg
gacatatagggagatcggttgattttgctattttttcattacatttagcgggtgcttctt
caattataggagctattaattttattactactattataaatatacgaccgtgaggaataa
ctatggaaaaagttcctttgtttgtatgatctgttttaattacagctgttttattacttt
tatcattgcctgtattagcaggtgctattactatattattaactgatcgaaattttaata
cttctttttttgatcctgcaggaggaggagatcctgtattgtttcaacattta
>SMNKARA08304_Titanoeca_psammophila_8y66E_49y33N_ad_f_A_Titanoecidae
ctttgtatttaatttttgggtcttgggctgctatagtaggtactgcaataagagtgttga
ttcgggttgaattaggttctcctgggagatttttaggagatgatcatttatataatgtta
ttgtaactgctcatgcgtttgttatgattttttttatggtgatacctattttaattggag
ggtttggaaattgattagtacctttaatgttaggagcacctgatatagcttttcctcgaa
taaataatttgagattttgattattgcctccttctttaataatattatttatttcttcta
tagttgaaatgggagtaggggctggttggactgtataccctcctttggctggaagattgg
gtcattttggggtatctgtagattttgctattttttctttacatttagctggggcttctt
caattataggggctattaattttatttctactattattaatatacggttaatagggataa
ctatagaaaaagtacctttatttgtatggtctgttttaattactgctgtgttgttattgt
tatctttacctgttttagctggggctattactatattattaactgatcggaattttaata
cctcgttttttgatcccgcaggaggaggtgatcctattttatttcaacattta
>SMNKARA08305_Haplodrassus_dalmatensis_8y38E_49y03N_ad_m_A_Gnaphosidae
ctttatatttactttttggttcttgagctgctatagtaggaactgcaatgagagtattaa
ttcgaatagaattaggacaatctggtagatttattggagatgatcatctctataatgttg
ttgttactgcacatgcttttgttataattttttttatagtaatacctattttaattgggg
gttttggaaattgattggtgcctttaatgttaggggcacctgatatagcttttcctcgta
taaataatttaagtttttgattattaccaccttctctggttttattatttatttcttcta
tggttgagataggagttggagctgggtgaactgtatatcctcctttagcttcttctgtag
gtcatagtggtagagcaatagattttgctattttttctttacatttagccggtgcctcat
ctattataggagctattaattttatttctactgtaattaatatacgatctgtgggaatga
gaatggaaaaggtacctttatttgtatgatctgttcttattacagcagtattactattat
tatctttacctgtattagcaggagctattactatattattaacggatcgaaattttaata
cttcattttttgatccagcaggaggaggggatcctattttatttcaacattta
>SMNKARA08306_Haplodrassus_dalmatensis_8y38E_49y03N_ad_f_A_Gnaphosidae
ctttatatttactttttggttcttgagctgctatagtaggaactgcaatgagagtattaa
ttcgaatagaattaggacaatctggtagatttattggagatgatcatctctataatgttg
ttgttactgcacatgcttttgttataattttttttatagtaatacctattttaattgggg
gttttggaaattgattggtgcctttaatgttaggggcacctgatatagcttttcctcgta
taaataatttaagtttttgattattaccaccttctctggttttattatttatttcttcta
tggttgagataggagttggagctgggtgaactgtatatcctcctttagcttcttctgtag
gtcatagtggtagagcaatagattttgctattttttctttacatttagccggtgcctcat
ctattataggagctattaattttatttctactgtaattaatatacgatctgtgggaatga
gaatggaaaaggtacctttatttgtatgatctgttcttattacagcagtattactattat
tatctttacctgtattagcaggagctattactatattattaacggatcgaaattttaata
cttcattttttgatccagcaggaggaggggatcctattttatttcaacattta
>SMNKARA08307_Haplodrassus_dalmatensis_8y38E_49y03N_ad_f_A_Gnaphosidae
ctttatatttactttttggttcttgagctgctatagtaggaactgcaatgagagtattaa
ttcgaatagaattaggacaatctggtagatttattggagatgatcatctctataatgttg
ttgttactgcacatgcttttgttataattttttttatagtaatacctattttaattgggg
gttttggaaattgattggtgcctttaatgttaggggcacctgatatagcttttcctcgta
taaataatttaagtttttgattattaccaccttctctggttttattatttatttcttcta
tggttgagataggagttggagctggatgaactgtatatcctcctttagcttcttctgtag
gtcatagtggtagagcaatagattttgctattttttctttacatttagccggtgcctcat
ctattataggagctattaattttatttctactgtaattaatatacgatctgtgggaatga
gaatggaaaaggtacctttatttgtatgatctgttcttattacagcagtattactattat
tatctttacctgtattagcaggagctattactatattattaacggatcgaaattttaata
cttcattttttgatccagcaggaggaggggatcctattttatttcaacattta
>SMNKARA08308_Haplodrassus_dalmatensis_8y38E_49y03N_ad_m_A_Gnaphosidae
ctttatatttactttttggttcttgagctgctatagtaggaactgcaatgagagtattaa
ttcgaatagaattaggacaatctggtagatttattggagatgatcatctctataatgttg
ttgttactgcacatgcttttgttataattttttttatagtaatacctattttaattgggg
gttttggaaattgattggtgcctttaatgttaggggcacctgatatagcttttcctcgta
taaataatttaagtttttgattattaccaccttctctggttttattatttatttcttcta
tggttgagataggagttggagctgggtgaactgtatatcctcctttagcttcttctgtag
gtcatagtggtagagcaatagattttgctattttttctttacatttagccggtgcctcat
ctattataggagctattaattttatttctactgtaattaatatacgatctgtgggaatga
gaatggaaaaggtacctttatttgtatgatctgttcttattacagcagtattactattat
tatctttacctgtattagcaggagctattactatattattaacggatcgaaattttaata
cttcattttttgatccagcaggaggaggggatcctattttatttcaacattta
>SMNKARA08310_Haplodrassus_dalmatensis_8y19E_48y83N_ad_m_A_Gnaphosidae
ctttatatttactttttggttcttgagctgctatagtaggaactgcaatgagagtattaa
ttcgaatagaattaggacaatctggtagatttattggagatgatcatctctataatgttg
ttgttactgcacatgcttttgttataattttttttatagtaatacctattttaattgggg
gttttggaaattgattggtgcctttaatgttaggggcacctgatatagcttttcctcgta
taaataatttaagtttttgattattaccaccttctctggttttattatttatttcttcta
tggttgagataggagttggagctgggtgaactgtatatcctcctttagcttcttctgtag
gtcatagtggtagagcaatagattttgctattttttctttacatttagccggtgcctcat
ctattataggagctattaattttatttctactgtaattaatatacgatctgtgggaatga
gaatggaaaaggtacctttatttgtatgatctgttcttattacagcagtattactattat
tatctttacctgtattagcaggagctattactatattattaacggatcgaaattttaata
cttcattttttgatccagcaggaggaggggatcctattttatttcaacattta
>SMNKARA08312_Haplodrassus_dalmatensis_8y19E_48y83N_ad_m_A_Gnaphosidae
ctttatatttactttttggttcttgagctgctatagtaggaactgcaatgagagtattaa
ttcgaatagaattaggacaatctggtagatttattggagatgatcatctctataatgttg
ttgttactgcacatgcttttgttataattttttttatagtaatacctattttaattgggg
gttttggaaattgattggtgcctttaatgttaggggcacctgatatagcttttcctcgta
taaataatttaagtttttgattattaccaccttctctggttttattatttatttcttcta
tggttgagataggagttggagctgggtgaactgtatatcctcctttagcttcttctgtag
gtcatagtggtagagcaatagattttgctattttttctttacatttagccggtgcctcat
ctattataggagctattaattttatttctactgtaattaatatacgatctgtgggaatga
gaatggaaaaggtacctttatttgtatgatctgttcttattacagcagtattactattat
tatctttacctgtattagcaggagctattactatattattaacggatcgaaattttaata
cttcattttttgatccagcaggaggaggggatcctattttatttcaacattta
>SMNKARA08313_Haplodrassus_dalmatensis_8y19E_48y82N_ad_m_A_Gnaphosidae
ctttatatttactttttggttcttgagctgctatagtaggaactgcaatgagagtattaa
ttcgaatagaattaggacaatctggtagatttattggagatgatcatctctataatgttg
ttgttactgcacatgcttttgttataattttttttatagtaatacctattttaattgggg
gttttggaaattgattggtgcctttaatgttaggggcacctgatatagcttttcctcgta
taaataatttaagtttttgattattaccaccttctctggttttattatttatttcttcta
tggttgagataggagttggagctggatgaactgtatatcctcctttagcttcttctgtag
gtcatagtggtagagcaatagattttgctattttttctttacatttagccggtgcctcat
ctattataggagctattaattttatttctactgtaattaatatacgatctgtgggaatga
gaatggaaaaggtacctttatttgtatgatctgttcttattacagcagtattactattat
tatctttacctgtattagcaggagctattactatattattaacggatcgaaattttaata
cttcattttttgatccagcaggaggaggggatcctattttatttcaacattta
>SMNKARA08314_Haplodrassus_dalmatensis_8y19E_48y82N_ad_m_A_Gnaphosidae
ctttatatttactttttggttcttgagctgctatagtaggaactgcaataagagtattaa
ttcgaatggaattaggacaatctggtagatttattggagatgatcatctctataatgttg
ttgttactgcacatgcttttgttataattttttttatagtaatgcctattttaattggag
gttttggaaattgattagtgcctttaatgttaggagcacctgatatagcttttcctcgta
tgaataacttaagtttttgattattaccaccttctctggtattattatttatttcttcta
tggttgaaataggagttggagctgggtgaactgtatatcctcctttagcctcttctgtag
gtcatagtggtagagcaatggattttgctattttttctttacatttagccggtgcttcat
ctattataggagctattaattttatttctactgtaattaatatacgatctgtgggaatga
gaatggaaaaggtacctttatttgtatgatctgttcttattacagcagtattgttattat
tatctttacctgtattagcaggagctattactatattattaacggatcgaaattttaata
cttcattttttgatccagctggaggaggagatcctattttatttcaacattta
>SMNKARA08315_Haplodrassus_dalmatensis_8y19E_48y83N_ad_m_A_Gnaphosidae
ctttatatttactttttggttcttgagctgctatagtaggaactgcaataagagtattaa
ttcgaatggaattaggacaatctggtagatttattggagatgatcatctctataatgttg
ttgttactgcacatgcttttgttataattttttttatagtaatgcctattttaattggag
gttttggaaattgattagtgcctttaatgttaggagcacctgatatagcttttcctcgta
tgaataacttaagtttttgattattaccaccttctctggttttattatttatttcttcta
tggttgaaataggagttggagctgggtgaactgtatatcctcctttagcctcttctgtag
gtcatagtggtagagcaatggattttgctattttttctttacatttagctggtgcttcat
ctattataggagctattaattttatttctactgtaattaatatacgatctgtgggaatga
gaatggaaaaggtacctttatttgtgtgatctgttcttattacagcagtattgttattac
tatctttacctgtattagcaggagctattactatattattaacggatcgaaattttaata
cttcattttttgatccagctggaggaggagatcctattttatttcaacattta
>SMNKARA08316_Haplodrassus_signifer_8y19E_48y83N_ad_m_A_Gnaphosidae
ctttatatttactttttggatcttgagctgctatagtaggaactgcaataagagtattaa
ttcggatggaattaggacaatcaggaagatttattggggatgatcatttatataatgtaa
ttgttactgctcatgcatttgttataattttttttatagtaatacctattataattggtg
gttttggtaattggttagttcctttaatgttaggagccccagatatagcttttcctcgaa
taaataatttaagtttttgattattacccccatctttagttttattatttgtttcttcta
tagttgaaatgggagttggagctgggtgaactgtatatccacctttagcttcttctatag
gacatagtggtagagctatggattttgctattttttctttacatttggctggtgcttctt
ctattataggggctattaattttatttctactgtaattaatatgcgttctttaggaataa
gtatagagaaagtacctttatttgtttgatctgtctttattacagcggtattattattat
tatccttacctgtattggcaggagctattactatattattgacggatcgtaattttaata
cttctttttttgacccagctgggggaggagatcctattttatttcaacattta
>SMNKARA08317_Haplodrassus_signifer_8y66E_49y33N_ad_m_A_Gnaphosidae
ctttatatttactttttggatcttgagctgctatagtaggaactgcaataagagtattaa
ttcggatggaattaggacaatcaggaagatttattggggatgatcatttatataatgtaa
ttgttactgctcatgcatttgttataattttttttatagtaatacctattataattggtg
gttttggtaattggttagttcctttaatgttaggagccccagatatagcttttcctcgaa
taaataatttaagtttttgattattacccccatctttagttttattatttgtttcttcta
tagttgaaatgggagttggagctgggtgaactgtatatccacctttagcttcttctatag
gacatagtggtagagctatggattttgctattttttctttacatttggctggtgcttctt
ctattataggggctattaattttatttctactgtaattaatatgcgttctttaggtataa
gtatagagaaagtacctttatttgtttgatctgtctttattacagcggtattattattat
tatccttacctgtattggcaggagctattactatattattgacggatcgtaattttaata
cttctttttttgacccagctgggggaggagatcctattttatttcaacattta
>SMNKARA08318_Zelotes_electus_8y19E_48y83N_ad_m_A_Gnaphosidae
ctttatatttattatttggttcatgggctgctatggtgggaactgctataagagtattaa
ttcgtatggaattaggccagtctggaagatttatgggtgatgatcatttatataatgtta
ttgtaactgctcatgcatttgttataattttttttatggttatacctattttaattggtg
ggtttggaaattgattagttcctttgatattaggagcaccagatatggcatttcctcgta
taaataatttaagtttttgattattacctccttcattaatattattgtttatttcttcta
tggtagaaataggagttggagctggttgaactgtatatccacctttgtcttctaatatag
gtcattcgggaagagctatggattttgctattttttctttacatttagcaggtgcttctt
ctattatgggagcgattaattttatttctactgtaattaatatgcgttctattggaataa
gtatggaaaaagttcctttatttgtatggtcggtatttattactgcggtattattattat
tatctttacctgtattagcaggtgctattactatattgttaactgatcgtaattttaata
cttcgttttttgaccctgctggagggggagatccaattctatttcagcattta
>SMNKARA08319_Zelotes_electus_8y19E_48y82N_ad_m_A_Gnaphosidae
ctttatatttattatttggttcatgggctgctatggtgggaactgctataagagtattaa
ttcgtatggaattaggccagtctggaagatttatgggtgatgatcatttatataatgtta
ttgtaactgctcatgcatttgttataattttttttatggttatacctattttaattggtg
ggtttggaaattgattagttcctttgatattaggagcaccagatatggcatttcctcgta
taaataatttaagtttttgattattacctccttcattaatattattgtttatttcttcta
tggtagaaataggagttggagctggttgaactgtatatccacctttgtcttctaatatag
gtcattcgggaagagctatggattttgctattttttctttacatttagcaggtgcttctt
ctattatgggagcgattaattttatttctactgtaattaatatgcgttctattggaataa
gtatggaaaaagttcctttatttgtatggtcggtatttattactgcggtattattattat
tatctttacctgtattagcaggtgctattactatattgttaactgatcgtaattttaata
cttcgttttttgaccctgctggagggggagatccaattctatttcagcattta
>SMNKARA08320_Zelotes_electus_8y19E_48y82N_ad_m_A_Gnaphosidae
ctttatatttattatttggttcatgggctgctatggtgggaactgctataagagtattaa
ttcgtatggaattaggccagtctggaagatttatgggtgatgatcatttatataatgtta
ttgtaactgctcatgcatttgttataattttttttatggttatacctattttaattggtg
ggtttggaaattgattagttcctttgatattaggagcaccagatatggcatttcctcgta
taaataatttaagtttttgattattacctccttcattaatattattgtttatttcttcta
tggtagaaataggagttggagctggttgaactgtatatccacctttgtcttctaatatag
gtcattcgggaagagctatggattttgctattttttctttacatttagcaggtgcttctt
ctattatgggagcgattaattttatttctactgtaattaatatgcgttctattggaataa
gtatggaaaaagttcctttatttgtatggtcggtatttattactgcggtattattattat
tatctttacctgtattagcaggtgctattactatattgttaactgatcgtaattttaata
cttcgttttttgaccctgctggagggggagatccaattctatttcagcattta
>SMNKARA08321_Zelotes_electus_8y38E_49y03N_ad_f_A_Gnaphosidae
ctttatatttattatttggttcatgggctgctatggtgggaactgctataagagtattaa
ttcgtatggaattaggccagtctggaagatttatgggtgatgatcatttatataatgtta
ttgtaactgctcatgcatttgttataattttttttatggttatacctattttaattggtg
ggtttggaaattgattagttcctttgatattaggagcaccagatatggcatttcctcgta
taaataatttaagtttttgattattacctccttcattaatattattgtttatttcttcta
tggtagaaataggagttggagctggttgaactgtatatccacctttgtcttctaatatag
gtcattcgggaagagctatggattttgctattttttctttacatttagcaggtgcttctt
ctattatgggagcgattaattttatttctactgtaattaatatgcgttctattggaataa
gtatggaaaaagttcctttatttgtatggtcggtatttattactgcggtattattattat
tatctttacctgtattagcaggtgctattactatattgttaactgatcgtaattttaata
cttcgttttttgaccctgctggagggggagatccaattctatttcagcattta
>SMNKARA08322_Zelotes_longipes_8y38E_49y03N_ad_f_A_Gnaphosidae
ctttatatttattatttggttcatgagctgctatggttggaactgctataagagtattaa
ttcgaatagaattaggtcagcctggtagatttataggtgatgatcatttatataatgtta
ttgtaacggctcatgcttttgttataatcttttttatagttatacctattttaattggtg
gatttggaaattgattggtgcctttgatgttaggtgcaccagatatagcatttccacgta
taaataatttaagtttttggttattaccaccttcattaatattattatttatttcttcta
tagtggaaataggggttggggctggttgaactgtatatccacctttagcttctaatatag
gtcatgcaggaagagctatggattttgctattttttctttacatttagcaggtgcttctt
ctattataggagcaattaattttatttctactgtaattaatatacgttctattggaataa
ctatagaaaaggttcctttgtttgtatgatcagtatttattactgcagtattattattat
tatctttacctgtattagcaggtgctattactatgttattaactgatcgaaattttaata
cttcattttttgatccagctggagggggggaccctattttatttcaacatttg
>SMNKARA08323_Zelotes_longipes_8y38E_49y03N_ad_f_A_Gnaphosidae
ctttatatttattatttggttcatgagctgctatggttggaactgctataagagtattaa
ttcgaatagaattaggtcagcctggtagatttataggtgatgatcatttatataatgtta
ttgtaacggctcatgcttttgttataatcttttttatagttatacctattttaattggtg
gatttggaaattgattggtgcctttgatgttaggtgcaccagatatagcatttccacgta
taaataatttaagtttttggttattaccaccttcattaatattattatttatttcttcta
tagtggaaataggggttggggctggttgaactgtatatccacctttagcttctaatatag
gtcatgcaggaagagctatggattttgctattttttctttacatttagcaggtgcttctt
ctattataggagcaattaattttatttctactgtaattaatatacgttctattggaataa
ctatagaaaaggttcctttgtttgtatgatcagtatttattactgcagtattattattat
tatctttacctgtattagcaggtgctattactatgttattaactgatcgaaattttaata
cttcattttttgatccagctggagggggggatcctattttatttcaacatttg
>SMNKARA08324_Zelotes_longipes_8y19E_48y83N_ad_m_A_Gnaphosidae
ctttatatttattatttggttcatgagctgctatggttggaactgctataagagtattaa
ttcgaatagaattaggtcagcctggtagatttataggtgatgatcatttatataatgtta
ttgtaacggctcatgcttttgttataatcttttttatagttatacctattttaattggtg
gatttggaaattgattggtgcctttgatgttaggtgcaccagatatagcatttccacgta
taaataatttaagtttttggttattaccaccttcattaatattattatttatttcttcta
tagtggaaataggggttggggctggttgaactgtatatccacctttagcttctaatatag
gtcatgcaggaagagctatggattttgctattttttctttacatttagcaggtgcttctt
ctattataggagcaattaattttatttctactgtaattaatatacgttctattggaataa
ctatagaaaaggttcctttgtttgtatgatcagtatttattactgcagtattattattat
tatctttacctgtattagcaggtgctattactatgttattaactgatcgaaattttaata
cttcattttttgatccagctggagggggggatcctattttatttcaacatttg
>SMNKARA08311_Haplodrassus_dalmatensis_8y19E_48y83N_ad_m_A_Gnaphosidae
ctttatatttactttttggttcttgagctgctatagtaggaactgcaatgagagtattaa
ttcgaatagaattaggacaatctggtagatttattggagatgatcatctctataatgttg
ttgttactgcacatgcttttgttataattttttttatagtaatacctattttaattgggg
gttttggaaattgattggtgcctttaatgttaggggcacctgatatagcttttcctcgta
taaataatttaagtttttgattattaccaccttctctggttttattatttatttcttcta
tggttgagataggagttggagctgggtgaactgtatatcctcctttagcttcttctgtag
gtcatagtggtagagcaatagattttgctattttttctttacatttagccggtgcctcat
ctattataggagctattaattttatttctactgtaattaatatacgatctgtgggaatga
gaatggaaaaggtacctttatttgtatgatctgttcttattacagcagtattactattat
tatctttacctgtattagcaggagctattactatattattaacggatcgaaattttaata
cttcattttttgatccggcaggaggaggggatcctattttatttcaacattta
>SMNKARA08327_Alopecosa_fabrilis_8y66E_49y33N_ad_f_A_Lycosidae
ctttatatttatttttaggtgtttgatcagctataatggggactgctatatcagtattaa
ttcgaatggaattaggtaatcctggaagtttattgggagatgatcatttatataatgtta
tagttactgctcatgcttttgtgataattttttttatggttataccaattcttattggtg
ggtttggtaattgattaattcctttaatattaggggctcctgatatatcatttcctcgaa
tgaataatctttctttctggttattacctccttctttgtttttgttatgtatatcttcta
tagtagagatgggagtaggagctggttgaactgtttatccacctttggcatcaagagtag
ggcatagaggaagttctatagattttgctattttttctcttcatttagctggggcttctt
ctattatgggtgcggtaaattttatttctactattattaatatacgtatattaggaatat
caatggaaaaggttcctttatttgtttgatcagttttaattacagctgttttgttattac
tttctttacctgtattagcgggtgctattactatattgttaacggatcgaaattttaata
cttctttttttgatccagcaggtgggggagatcctattttatttcaacattta
>SMNKARA08328_Arctosa_lutetiana_8y66E_49y33N_ad_f_A_Lycosidae
ctttatatttagtgtttggagtttgatcatctatagttggtactgctataagaataataa
ttcgtatagaattaggacattctggaagttttttaggtgatgatcatttatataatgtag
tggtaacagcacatgcttttgtaataattttttttatagtaatacctattttaattggtg
gttttggaaattgattagttcctttgatattaggagctcctgatatatcttttcctcgta
taaataatctttctttttgattattacccccttctttatttttattatttatatcttcta
tagtagagataggggtaggagcaggatgaactgtatatcctcctttagcgtctagagtgg
gtcatagaggaagttctatagattttgctattttttctcttcacttagcaggggcttctt
ctattataggagcggtgaattttatttccactattattaatatacggttaataggaataa
aaatagataaagttccattatttgtttgatctgtattaattacagctattttattattac
tttctttacctgtattagcaggtgctattactatattattaactgatcgaaattttaata
cttctttttttgatccagcgggaggaggagatcctattttatttcaacattta
>SMNKARA08329_Pardosa_lugubris_8y48E_48y97N_ad_f_A_Lycosidae
ctttatatttaatatttggagtttgatcggctataatagggactgctataagagtattaa
ttcgaatagaattaggaaatcctgggagattattaggtgatgatcatttatataatgtta
tagttactgctcatgcttttgtaataattttttttatagtaataccaattcttattggag
gttttgggaattgattaattcctttaatattaggagctccagatatatcatttcctcgaa
taaataatctttctttttgattattacctccttctttatttttattatctatatcttcta
tagtggagataggagttggtgctggatgaactgtttatcctcctttagcatctacggttg
gtcatataggaagttcaatagattttgctattttttctcttcatttggctggagcttctt
ctattataggggctgtaaattttatttctactattataaatatacggataataggaatat
ctttagaaaaggttcctctttttgtttgatcagttttaattacagcagtattattattac
tttctttacctgttttagcaggtgctattactatattattaacagatcggaattttaata
cttctttttttgatcctgctggtggaggagatcctattttatttcaacattta
>SMNKARA08330_Agroeca_proxima_8y22E_48y55N_ad_m_A_Liocranidae
ctttgtatttgatttttggtgcttgagctgctatagttggaactgcaataagagttttga
tccgaatggagttaggacaatcgggtagattattaggtgatgatcatttatataatgttg
tagttactgctcatgcttttgttatgattttttttatggttataccaattataattggtg
gttttggtaattgattggttcctttaatgttaggtgctcccgatatagcttttcctcgaa
taaataatttaagtttttgattattacccccttcgttattattgttgtttatttcttcta
tagctgaaataggagtgggtgctggttgaactgtttatcctcctttggcatctggagttg
gtcatgtaggtagtgctatggattttgctattttttctttacatttagcaggggcatctt
caattataggtgctgtaaattttatttctactattattaatatacgttctattggaatat
ctatagataaagtatctttgtttgtttgatcagtatttattactgcggtattattattgt
tatctttacctgtattggcaggtgcaattacaatgttattgactgatcgaaattttaata
cttctttttttgatcctgcaggaggtggagatcctattttatttcaacattta
>SMNKARA08331_Agroeca_proxima_8y22E_48y55N_ad_f_A_Liocranidae
ctttgtatttgatttttggtgcttgagctgctatagttggaactgcaataagagttttga
tccgaatggagttaggacaatcgggtagattattaggtgatgatcatttatataatgttg
tagttactgctcatgcttttgttatgattttttttatggttataccaattataattggtg
gttttggtaattgattggttcctttaatgttaggtgctcccgatatagcttttcctcgaa
taaataatttaagtttttgattattacccccttcgttattattgttgtttatttcttcta
tagctgaaataggagtgggtgctggttgaactgtttatcctcctttggcatctggagttg
gtcatgtaggtagtgctatggattttgctattttttctttacatttagcaggggcatctt
caattataggtgctgtaaattttatttctactattattaatatacgttctattggaatat
ctatagataaagtatctttgtttgtttgatcagtatttattactgcggtattattattgt
tatctttacctgtattggcaggtgcaattacaatgttattgactgatcgaaattttaata
cttctttttttgatcctgcaggaggtggagatcctattttatttcaacattta
>SMNKARA08332_Xerolycosa_nemoralis_8y22E_48y55N_ad_f_A_Lycosidae
ctttatatttaatatttggggtatgatcagctatagctggaactgctataagagtattga
ttcgaatagaattagggaattctggtagtttattaggtgatgatcatttatataatgttg
ttgtaactgctcatgcttttgtgataattttttttatggtaatgcctattttaattggtg
ggtttggaaattgattagttcctttaatattaggagctcctgatatatcatttcctcgaa
taaataatctttctttttgattgttacctccttctttatttttattatttatatcttcta
tagtagaaatgggagttggagctggatgaacaatttatcctcctttggcttctagagttg
gacatataggaagttctatagattttgctattttttctcttcatttagctggagcttctt
ctattataggggcagtaaattttatttctactattattaatatacgtttagttggaataa
caatagaaaaagtacctttatttgtatgatctgtattaattaccgctattttattattat
tgtcattacctgttttagcaggggctattactatattattgactgatcgtaattttaata
cttctttttttgatcctgctggaggaggagatccaattttatttcaacatttg
>SMNKARA08333_Xerolycosa_nemoralis_8y22E_48y55N_ad_m_A_Lycosidae
ctttatatttaatatttggggtatgatcagctatagctggaactgctataagagtattga
ttcgaatagaattagggaattctggtagtttattaggtgatgatcatttatataatgttg
ttgtaactgctcatgcttttgtgataattttttttatggtaatgcctattttaattggtg
ggtttggaaattgattagttcctttaatattaggagctcctgatatatcatttcctcgaa
taaataatctttctttttgattgttacctccttctttatttttattatttatatcttcta
tagtagaaatgggagttggagctggatgaacaatttatcctcctttggcttctagagttg
gacatataggaagttctatagattttgctattttttctcttcatttagctggagcttctt
ctattataggggcagtaaattttatttctactattattaatatacgtttagttggaataa
caatagaaaaagtacctttatttgtatgatctgtattaattaccgctattttattattat
tgtcattacctgttttagcaggggctattactatattattgactgatcgtaattttaata
cttctttttttgatcctgctggaggaggagatccaattttatttcaacatttg
>SMNKARA08334_Xerolycosa_nemoralis_8y22E_48y55N_ad_f_A_Lycosidae
ctttatatttaatatttggggtatgatcagctatagctggaactgctataagagtattga
ttcgaatagaattagggaattctggtagtttattaggtgatgatcatttatataatgttg
ttgtaactgctcatgcttttgtgataattttttttatggtaatgcctattttaattggtg
ggtttggaaattgattagttcctttaatattaggagctcctgatatatcatttcctcgaa
taaataatctttctttttgattgttacctccttctttatttttattatttatatcttcta
tagtagaaatgggagttggagctggatgaacaatttatcctcctttggcttctagagttg
gacatataggaagttctatagattttgctattttttctcttcatttagctggagcttctt
ctattataggggcagtaaattttatttctactattattaatatacgtttagttggaataa
caatagaaaaagtacctttatttgtatgatctgtattaattaccgctattttattattat
tgtcattacctgttttagcaggggctattactatattattgactgatcgtaattttaata
cttctttttttgatcctgctggaggaggagatccaattttatttcaacatttg
>SMNKARA08335_Xerolycosa_nemoralis_8y22E_48y55N_ad_m_A_Lycosidae
ctttatatttaatatttggggtatgatcagctatagctggaactgctataagagtattga
ttcgaatagaattagggaattctggtagtttattaggtgatgatcatttatataatgttg
ttgtaactgctcatgcttttgtgataattttttttatggtaatgcctattttaattggtg
ggtttggaaattgattagttcctttaatattaggagctcctgatatatcatttcctcgaa
taaataatctttctttttgattgttacctccttctttatttttattatttatatcttcta
tagtagaaatgggagttggagctggatgaacaatttatcctcctttggcttctagagttg
gacatataggaagttctatagattttgctattttttctcttcatttagctggagcttctt
ctattataggggcagtaaattttatttctactattattaatatacgtttagttggaataa
caatagaaaaagtacctttatttgtatgatctgtattaattaccgctattttattattat
tgtcattacctgttttagcaggggctattactatattattgactgatcgtaattttaata
cttctttttttgatcctgctggaggaggagatccaattttatttcaacatttg
>SMNKARA08336_Xerolycosa_nemoralis_8y22E_48y55N_ad_m_A_Lycosidae
ctttatatttaatatttggggtatgatcagctatagctggaactgctataagagtattga
ttcgaatagaattagggaattctggtagtttattaggtgatgatcatttatataatgttg
ttgtaactgctcatgcttttgtgataattttttttatggtaatgcctattttaattggtg
ggtttggaaattgattagttcctttaatattaggagctcctgatatatcatttcctcgaa
taaataatctttctttttgattgttacctccttctttatttttattatttatatcttcta
tagtagaaatgggagttggagctggatgaacaatttatcctcctttggcttctagagttg
gacatataggaagttctatagattttgctattttttctcttcatttagctggagcttctt
ctattataggggcagtaaattttatttctactattattaatatacgtttagttggaataa
caatagaaaaagtacctttatttgtatgatctgtattaattaccgctattttattattat
tgtcattacctgttttagcaggggctattactatattattgactgatcgtaattttaata
cttctttttttgatcctgctggaggaggagatccaattttatttcaacatttg
>SMNKARA08337_Pardosa_hortensis_8y19E_48y83N_ad_f_A_Lycosidae
ctttgtatttaatatttggagtttgatcggctataataggaactgctataagagtattaa
ttcggatagagttgggaaatcctggaagattattaggtgatgatcatttatataatgtta
tggttactgctcatgcttttgtaatgattttttttatagtgataccaattcttattggag
gatttggaaattgattggttcctttaatattaggtgctccagatatatcgtttcctcgga
taaataatctttctttttgattattacctccttctttgtttttattatctatatcttcta
tagtagagataggagttggtgctggatgaactgtttatcctcctttagcgtctacggttg
gtcatataggaagttcaatagattttgctattttttctcttcatttagctggggcttctt
ctattataggtgctgtaaattttatttctactattattaatatacgaatattaggaatat
ctatagagaaagttcctctttttgtttggtcagtattaattactgcagtattattgttgc
tttctttaccggttttagcgggtgctattactatattattaacagatcgtaattttaata
cttctttttttgatcctgctgggggtggtgatcctattttatttcaacattta
>SMNKARA08339_Eresus_kollari_8y66E_49y33N_jv_A_Eresidae
cattatatttaatttttggagcttggtcggctatggttggaacttcaataagaataatta
ttcgaacagaattaggacaatctgggagattattaggagatgatcatctgtataatgttg
ttgttactgctcatgcttttgtaatgattttttttatagttataccaattttaattggag
ggtttgggaattgattagttcctttaatattaggagcacctgatatagcttttcctcgaa
taaataatttaagtttttggttgttacctccttcattgtttatattatttatgtcttcta
tggtagagatgggtgtaggaacagggtgaactgtttatcctcctttggcttcattaatag
gccattcgggaagatcagtggattttgctattttttcattacatttagctggggcttctt
ctattataggagctattaatttcattacaactgtaattaatatacgttcatatggaataa
ctatagagaaggtaccattatttgtttggtctgtattaattactgcagtattattattac
tatctttacctgttttagcaggtgctattacaatattattaactgatcgaaattttaata
catcgttttttgaccctgctgggggaggggacccggttttatttcaacattta
>SMNKARA08340_Eresus_kollari_8y66E_49y33N_ad_m_A_Eresidae
cattatatttaatttttggagcttggtcggctatggttggaacttcaataagaataatta
ttcgaacagaattaggacaatctgggagattattaggagatgatcatctgtataatgttg
ttgttactgctcatgcttttgtaatgattttttttatagttataccaattttaattggag
ggtttgggaattgattagttcctttaatattaggagcacctgatatagcttttcctcgaa
taaataatttaagtttttggttgttacctccttcattgtttatattatttatgtcttcta
tggtagagatgggtgtaggaacagggtgaactgtttatcctcctttggcttcattaatag
gccattcgggaagatcagtggattttgctattttttcattacatttagctggggcttctt
ctattataggagctattaatttcattacaactgtaattaatatacgttcatatggaataa
ctatagagaaggtaccattatttgtttggtctgtattaattactgcagtattattattac
tatctttacctgttttagcaggtgctattacaatattattaactgatcgaaattttaata
catcgttttttgaccctgctgggggaggggacccgattttatttcaacattta
>SMNKARA08341_Eresus_kollari_8y66E_49y33N_ad_m_A_Eresidae
cattatatttaatttttggagcttggtcggctatggttggaacttcaataagaataatta
ttcgaacagaattaggacaatctgggagattattaggagatgatcatctgtataatgttg
ttgttactgctcatgcttttgtaatgattttttttatagttataccaattttaattggag
ggtttgggaattgattagttcctttaatattaggagcacctgatatagcttttcctcgaa
taaataatttaagtttttggttgttacctccttcattgtttatattatttatgtcttcta
tggtagagatgggtgtaggaacagggtgaactgtttatcctcctttggcttcattaatag
gccattcgggaagatcagtggattttgctattttttcattacatttagctggggcttctt
ctattataggagctattaatttcattacaactgtaattaatatacgttcatatggaataa
ctatagagaaggtaccattatttgtttggtctgtattaattactgcagtattattattac
tatctttacctgttttagcaggtgctattacaatattattaactgatcgaaattttaata
catcgttttttgaccctgctgggggaggggacccgattttatttcaacattta
>SMNKARA08342_Meta_menardi_9y45E_48y52N_sbad_f_A_Tetragnathidae
cgttatattttgtttttggggcttgagctgctatggtgggtactgctataagagtattga
ttcgaattgaattagggcaatcaggaagattgttaggggatgatcaattgtataatgtta
ttgtgacggctcatgcctttgtaataattttttttatagttataccggttttaattgggg
gatttggaaattgattagtccctttaatgttgggggttcctgatatagcttttcctcgta
taaataatttaagtttttggttattaccgccctcattttttttgttactcatttcttcaa
tagtagatataggagttggggcaggttggactatttatccccctttggcgtctttagacg
ggcattctgggagagcgatagattttgctattttttcacttcatttggctggggcgtctt
ctattatgggggcaattaattttatttctactgtattaaacatgcgtctttgagggatga
gaatagaaaaggtccctttatttgtttggtctgtattgattactgctgtgcttttgcttt
tatctttaccagttttagcaggggctattactatactattaactgatcgaaattttaata
cttctttttttgaccctttccgggggggggaccctgttctttttcaacattta
>SMNKARA08343_Meta_menardi_9y45E_48y52N_ad_m_A_Tetragnathidae
cgttatattttgtttttggggcttgagctgctatggtgggtactgctataagagtattga
ttcgaattgaattagggcaatcaggaagattgttaggggatgatcaattgtataatgtta
ttgtgacggctcatgcctttgtaataattttttttatagttataccggttttaattgggg
gatttggaaattgattagtccctttaatgttgggggttcctgatatagcttttcctcgta
taaataatttaagtttttggttattaccgccctcattttttttgttactcatttcttcaa
tagtagatataggagttggggcaggttggactatttatccccctttggcgtctttagacg
ggcattctgggagagcgatagattttgctattttttcacttcatttggctggggcgtctt
ctattatgggggcaattaattttatttctactgtattaaacatgcgtctttgagggatga
gaatagaaaaggtccctttatttgtttggtctgtattgattactgctgtgcttttgcttt
tatctttaccagttttagcaggggctattactatactattaactgttcgaaattttaata
cttctttttttgacccttccggggggggggaccctgttctttttcaacattta
>SMNKARA08344_Meta_menardi_9y45E_48y52N_sbad_m_A_Tetragnathidae
cgttatattttgtttttggggcttgagctgctatggtgggtactgctataagagtattga
ttcgaattgaattagggcaatcaggaagattgttaggggatgatcaattgtataatgtta
ttgtgacggctcatgcctttgtaataattttttttatagttataccggttttaattgggg
gatttggaaattgattagtccctttaatgttgggggttcctgatatagcttttcctcgta
taaataatttaagtttttggttattaccgccctcattttttttgttactcatttcttcaa
tagtagatataggagttggggcaggttggactatttatccccctttggcgtctttagacg
ggcattctgggagagcgatagattttgctattttttcacttcatttggctggggcgtctt
ctattatgggggcaattaattttatttctactgtattaaacatgcgtctttgagggatga
gaatagaaaaggtccctttatttgtttggtctgtattgattactgctgtgcttttgcttt
tatctttaccagttttagcaggggctattactatactattaactgatcgaaattttaata
cttctttttttgacccttccggggggggggaccctgttctttttcaacattta
>SMNKARA08345_Meta_menardi_9y45E_48y52N_sbad_m_A_Tetragnathidae
cgttatattttgtttttggggcttgagctgctatggtgggtactgctataagagtattga
ttcgaattgaattagggcaatcaggaagattgttaggggatgatcaattgtataatgtta
ttgtgacggctcatgcctttgtaataattttttttatagttataccggttttaattgggg
gatttggaaattgattagtccctttaatgttgggggttcctgatatagcttttcctcgta
taaataatttaagtttttggttattaccgccctcattttttttgttactcatttcttcaa
tagtagatataggagttggggcaggttggactatttatccccctttggcgtctttagacg
ggcattctgggagagcgatagattttgctattttttcacttcatttggctggggcgtctt
ctattatgggggcaattaattttatttctactgtattaaacatgcgtctttgagggatga
gaatagaaaaggtccctttatttgtttggtctgtattgattactgctgtgcttttgcttt
tatctttaccagttttagcaggggctattactatactattaactgatcgaaattttaata
cttctttttttgacccttccggggggggggaccctgttctttttcaacattta
>SMNKARA08346_Alopecosa_cursor_8y66E_49y33N_ad_f_A_Lycosidae
ctttatatttattattaggtgtttggtcggcaataataggaactgctatatcagtgttaa
ttcgaatagaattaggtaatcctgggagtttattaggtgatgatcatttatataatgtta
tagttactgctcatgcttttgtgatgattttttttatggtaataccaattcttattggtg
gatttggaaattggttggttcctttaatattaggggctcctgatatatcttttcctcgta
taaataatctttctttttgattattacctccttctttatttttgttgtgtatatcttcta
tagtggagataggggtaggggctggttgaactgtttatcctcctttagcgtcgagaatag
gtcatactggtagttctatagattttgctattttttctcttcatttagctggggcttctt
ctattataggggctgtgaattttatttctactattattaatatacgaatattgggaatat
caatagaaaaggttcctttatttgtttgatcagttttaattacagctgttttattattgc
tttctttacctgttttagcaggtgctattactatattattaactgatcgaaattttaata
cttctttttttgatccagcaggtggaggggatcctattctgtttcaacattta
>SMNKARA08347_Alopecosa_cursor_8y66E_49y33N_ad_f_A_Lycosidae
ctttatatttattattaggtgtttggtcggcaataataggaactgctatatcagtgttaa
ttcgaatagaattaggtaatcctgggagtttattaggtgatgatcatttatataatgtta
tagttactgctcatgcttttgtgatgattttttttatggtaataccaattcttattggtg
gatttggaaattggttggttcctttaatattaggggctcctgatatatcttttcctcgta
taaataatctttctttttgattattacctccttctttatttttgttgtgtatatcttcta
tagtggagataggggtaggggctggttgaactgtttatcctcctttagcgtcgagaatag
gtcatactggtagttctatagattttgctattttttctcttcatttagctggggcttctt
ctattataggggctgtgaattttatttctactattattaatatacgaatattgggaatat
caatagaaaaggttcctttatttgtttgatcagttttaattacagctgttttattattgc
tttctttacctgttttagcaggtgctattactatattattaactgatcgaaattttaata
cttctttttttgatccagcaggtggaggggatcctattctgtttcaacattta
>SMNKARA08348_Ozyptila_claveata_8y38E_49y03N_ad_m_A_Thomisidae
cattatatttgttgtttggtgcttgatcggctatggttggtacagcaataagagtattaa
ttcgtatagaattagggaatgtaggtagattattaggaaatgatcatttatataatgtgg
ttgttacagctcatgcttttgtaataattttttttatagtaatgccaattttgattgggg
gatttggaaattgattaattcctttgatattaggagctccagatatatcttttcctcgaa
taaataatttatctttttgactgcttcctccttcgttgtttttattatttatatcatcta
tagttgagataggggtaggggcaggatgaactgtttaccctcctttggcttctagagtag
ggcatatagggagatcaatagattttgctattttttctcttcatttagcaggagcatctt
caattataggtgctgtaaattttatttctactattattaatatacgaactgttggaatga
gaatggaaaaggttcctttatttgtttgatcagtattaattactgctattttattgcttt
tatcattgcctgttttagcaggggctattactatattattgacagatcgaaattttaata
cttctttttttgatcctgctgggggtggagaccctattttatttcaacatttg
>SMNKARA08349_Xysticus_kochi_8y19E_48y82N_ad_f_A_Thomisidae
cattatatttgttatttggtgcttgatctgctatagttgggactgcaataagtgtattaa
ttcgaatggaattagggaatgtaggtagattattaggaaatgatcatctatataatgtta
ttgttacagctcatgcttttgtaataattttttttatagtaatgcctattttgattggtg
gttttgggaattgattagtaccattaatattaggtgctcctgatatatcttttcctcgaa
taaataatttgtctttttggttacttcctccttcattatttttattatttatatcgtcta
tagtagaaataggtgtaggagcaggatgaactgtttatcctcctttagcttctagtgtag
ggcatataggaagatcaatagattttgctattttttctttacatttagcgggtgcttctt
ctattataggagctgttaattttatttcaactattattaatatacgagtaactgggataa
gaatggaaaaagttcctttatttgtttgatctgttttaattacagctattttacttcttt
tatctttacctgttttagctggagctattactatattacttactgatcgaaattttaata
cttctttctttgatcccgctggagggggggatccaattttatttcaacattta
>SMNKARA08350_Aelurillus_vinsignitus_8y66E_49y33N_ad_m_A_Salticidae
ctttatatttaatttttggagcatgatctgccatggtaggaacagcaataagagtattga
ttcgaatagaattaggacagacaggtagttttttaggtaatgatcatatatataatgtta
ttgtaactgctcatgcctttgtaatgattttttttatagtaataccaattataattggtg
gttttggaaattgattagttcctttgatgttgggagctcctgatatagctttccctcgaa
taaataacttaagattttgattattgcctccctctttatttttattatttatatcatcta
tagtagagataggggttggagctgggtgaactgtttatcctcctttggcttctattgttg
gtcataatggtagatctgtagattttgcaattttttctttacatttagctggagcttctt
caattataggagctattaattttatttctactgtagttaatatgcgatctgtagggataa
gtctagataagattcctttatttgtatgatctgttgttattacggctgttctattattat
tatctttgcctgtgttagccggtgctattactatactattaacagatcgtaattttaata
catctttttttgaccctgctggagggggagaccctattttgtttcaacacttg
>SMNKARA08351_Pellenes_nigrociliatus_8y66E_49y33N_ad_m_A_Salticidae
cattatatttaatttttggtgcttgagctgctatagtaggaactgctataagagtattaa
ttcgaatagaattaggtcaaactggaagatttttagggaatgatcatttgtataatgtta
ttgttactgcccatgcttttgtaatgattttttttatagtgatacctattttaattgggg
gttttggaaattgattagttcctttaatattaggtgctcctgatatggcttttccccgga
taaataatttaagtttttgattgttgcctccttctttaatactattatttatttcttcaa
tagtagagatgggagtaggtgctgggtgaacggtttatccccctttagcttcagtagtag
ggcatggtggaagatcagtggattttgctattttttctttacatttggctggtgcttctt
caattataggggctattaattttatttctacggttattaatatgcgttcttctagaatga
ctatggatagggttcctttatttgtgtgatcagttgtaattactgctgtcttattattgt
tgtctttacctgttttagcaggggctattactatattgttgactgatcgaaattttaata
catcgttttttgatccagcggggggtggtgatccaattttatttcaacattta
>SMNKARA08352_Mangora_acalypha_8y66E_49y33N_ad_m_A_Araneidae
ctttatatttggtttttggcgcttgggctgctatagtaggaacagctatgagagtattga
ttcgaattgagttggggcagccagggaggtttattggggatgaccagttgtataatgtaa
ttgttacagctcatgcttttgtgataattttttttatggtgatgccaattttaattgggg
ggtttgggaattggttagttcccttgatgttaggggctccagatatagcatttccccgaa
taaataatttgagtttttgattgcttcctccttctttatttttgttaatcatttcatcta
tagtcgaaataggggttggggcaggatgaactgtttatcctcctcttgcaagattagaag
ggcatgctgggagttccgttgattttgcaattttttctcttcatttggcaggggcttctt
ctattatgggggctattaattttattagaacaattattaatatacgattttatggaataa
ctatggagaaagtgccattgtttgtttggtccgtgctaattacagcggtcttattgctgt
tgtctttaccagttttagcgggggctattacgatgcttttaacagatcgaaattttaata
cttctttctttgacccttcaggagggggggatcctattttgttccaacatttg
>SMNKARA08353_Bathyphantes_gracilis_8y48E_48y97N_ad_m_A_Linyphiidae
ctttatatttaatttttggtgcttgagcagctatagttgggactgctataagagttttaa
ttcgaatagaattggggcaaactggaagaatattaggagatgaccatttatataatgtca
ttgttactgcacatgcttttgttataattttttttatagtgatacctattttgattgggg
ggtttggtaattggttggttcctttaatattaggggctccagatatagcttttcctcgaa
tgaataatttaagattttggttacttcctccttcattattaatattatttatttcttcaa
tagtagaaataggagttggagcaggttgaactgtttatcctcctttagcttctttagaag
ggcattcagggagatctgtggattttgctattttttctttacatttaggtggggcttcgt
caattataggggctattaattttatttcgacaattataaatatacgagtttatgatatca
gaatagaaaaggtttctttatttgtttgatcagtattgattactgcagttttattattat
tatctttacctgttttagcaggagctattactatattattaactgatcgcaattttaata
cttctttttttgatccagcaggaggaggggatcctgttttatttcaacattta
>SMNKARA08354_Bathyphantes_gracilis_8y48E_48y97N_ad_f_A_Linyphiidae
ctttatatttaatttttggtgcttgagcagctatagttgggactgctataagagttttaa
ttcgaattgaattggggcaaactggaagaatattaggagatgaccatttatataatgtca
ttgttactgcacatgcttttgttataattttttttatagtgatacctattttgattgggg
ggtttggtaattggttggttcctttaatattaggggctccagatatagcttttcctcgaa
tgaataatttaagattttggttacttcctccttcattattaatattatttatttcttcaa
tagtagaaataggagttggagcaggttgaactgtttatcctcctttagcttctttagaag
ggcattcagggagatctgtggattttgctattttttctttacatttagctggggcttcgt
caattataggggctattaattttatttcgacaattataaatatacgagcttatgatatca
gaatagaaaaggtttctttatttgtttgatcagtattgattactgcagttttattattat
tatctttacctgttttagcaggagctattactatattattaactgatcgaaattttaata
cttctttttttgatccagcaggaggaggggatcctgttttatttcaacattta
>SMNKARA08355_Agyneta_affinis_8y48E_48y97N_ad_m_A_Linyphiidae
gtttatattttatttttggagcttgagcggctatagttggtacagcaataagagtattaa
ttcgtattgagttaggacaaacgggtagattattaggtgatgatcagttgtataatgtta
ttgtaacagcccatgcttttgttataattttttttatagttataccaattttaattggtg
gatttggaaattggttggttcctttaatgttaggagcccctgatatagcttttcctcgta
taaataatttgagattttgattattaccaccttctttatttttactttttatctctagta
tagatgaaataggagttgggacagggtgaactgtttatccccctattgcttctttagagg
ggcatgccggtagatctgttgattttgccattttttctttacacttggctggggcttcgt
caattataggggctattaattttatttctactattttaaatatgcggggttacggtataa
cgatagaaaaagttcctttatttgtttggtctgttcttattacagctgttttattgctgt
tatctttacctgttttagctggtgctattactatgttgttaactgatcgtaattttaata
catcattttttgatccgtcggggggaggagatccggtcttatttcaacattta
>SMNKARA08357_Alopecosa_pulverulenta_8y48E_48y97N_ad_m_A_Lycosidae
ctttatatttaatattaggtatttgatcggctataataggaactgctatatcagtattaa
ttcgaatggaattaggtaatcctggaagtttattgggagatgatcatttatataatgtta
tagttactgctcatgcttttgtaatgattttttttatagtgataccaattcttattggtg
ggtttggtaattgattagttcctttaatattaggagcccctgatatatcatttcctcgta
taaataatctttctttttgattattacctccttctttatttttgttatgtatatcttcta
tagtagaaataggggtaggagctggttgaactgtttatcctcctttggcatcgagaatag
gtcatacaggaagttctatggattttgctattttttctcttcatttagctggggcttctt
ctattataggagcagtaaattttatttctactattattaatatacgaatattaggtatat
caatagagaaagttcctttatttgtttgatcagttttaattacagcagttttattattac
tttctttacctgttttagcaggtgctattactatattattaactgatcgaaattttaata
cttctttttttgatccagcaggtggaggggatcctattttatttcaacattta
>SMNKARA08380_Tenuiphantes_cristatus_8y22E_48y55N_ad_f_A_Linyphiidae
ctttatattttatttttggagcttgagccgctatagtgggaactgcaataagagtattaa
ttcgaatcgagttaggacaaactggaagaatgttgggagatgaccaattatataatgtaa
ttgttactgctcatgcttttgtgataattttttttatggttatacctattttaattggag
gatttggaaattggttagttcctttgatactaggggctcctgatatagcttttccacgaa
taaataatcttagattttgattacttcctccttctttattactattatttatttcaagaa
tagttgagataggggttggggcaggatgaactgtttatcctcctcttgcttctttagaag
gacatgccgggagttctgtagattttgctattttttctcttcacttagctggggcatctt
caattataggagctattaattttatctccactattgtaaatatgcgaggttatggagttt
caatagaaaaggttcctttatttgtgtgatctgttttaattactgctgtgttattgttgt
tatctcttcctgtattatcaggagctattacaatgttattaactgatcgaaattttaata
cttcttttttcgaccctgcagggggaggggatcctgtattgtttcagcattta
>SMNKARA08383_Tenuiphantes_cristatus_8y22E_48y55N_ad_f_A_Linyphiidae
ctttatattttatttttggagcttgagccgctatagtgggaactgcaataagagtattaa
ttcgaatcgagttaggacaaactggaagaatgttgggagatgaccaattatataatgtaa
ttgttactgctcatgcttttgtgataattttttttatggttatacctattttaattggag
gatttggaaattggttagttcctttgatactaggggctcctgatatagcttttccacgaa
taaataatcttagattttgattacttcctccttctttattactattatttatttcaagaa
tagttgagataggggttggggcaggatgaactgtttatcctcctcttgcttctttagaag
gacatgccgggagttctgtagattttgctattttttctcttcacttagctggggcatctt
caattataggagctattaattttatctccactattgtaaatatgcgaggttatggagttt
caatagaaaaggttcctttatttgtgtgatctgttttaattactgctgtgttattgttgt
tatctcttcctgtattagcaggagctattacaatgttattaactgatcgaaattttaata
cttcttttttcgaccctgcagggggaggggatcctgtattgtttcagcattta
>SMNKARA08384_Walckenaeria_obtusa_8y22E_48y55N_ad_m_A_Linyphiidae
gtttatattttatttttggggcttgggctgcgatagtagggacagcaataagagtattaa
ttcgaattgagttagggcaagttggtagtttattaggggacgatcagttatataatgtta
ttgttactgctcatgcttttgttataattttttttatagtaatacccattttaattggag
gatttggtaattggttggttcctttgatgttaggggccccggatatagcttttcctcgta
taaataatcttagattttggctattgcctccctctctattattattgtttatttctagta
tggatgagatgggtgtaggggcaggatgaactgtatatcctcctcttgcttctttggaag
gacattctggtagatcagtagattttgctattttttctttacacttagctggtgcatcat
caattatgggagcaattaattttatttcgactatttttaatatacgggggtatggaataa
ctatagaaaaggtgcctttatttgtttgatcagtcttaattacagctgttttattattgt
tatctttacctgttttagcaggagctattaccatgcttttgacggatcgaaattttaata
cttcatttttcgaccctgcggggggaggggatccggttttatttcaacattta
>SMNKARA08385_Walckenaeria_obtusa_8y22E_48y55N_ad_m_A_Linyphiidae
gtttatattttatttttggggcttgggctgcgatagtagggacagcaataagagtattaa
ttcgaattgagttagggcaagttggtagtttattaggggacgatcagttatataatgtta
ttgttactgctcatgcttttgttataattttttttatagtaatacccattttaattggag
gatttggtaattggttggttcctttgatgttaggggccccggatatagcttttcctcgta
taaataatcttagattttggctattgcctccctctctattattattgtttatttctagta
tggatgagatgggtgtaggggcaggatgaactgtatatcctcctcttgcttctttggaag
gacattctggtagatcagtagattttgctattttttctttacacttagctggtgcatcat
caattatgggagcaattaattttatttcgactatttttaatatacgagggtatggaataa
ctatagaaaaggtgcctttatttgtttgatcagtcttaattacagctgttttattattgt
tatctttacctgttttagcaggagctattaccatgcttttgacggatcgaaattttaata
cttcatttttcgaccctgcggggggaggggatccggttttatttcaacattta
>SMNKARA08386_Coelotes_terrestris_8y22E_48y55N_ad_f_A_Agelenidae
ctttgtatttaatttttggggcttggtctgctatagttggaacggctataagagtattga
ttcgaattgaattaggtcaatcagggagttttttaggtgatgatcatatatataatgtta
ttgttactgctcatgcttttgttataattttttttatagtaatgcctattttaattggag
gttttggtaattgattagtgcctttaatattaggtgctccagatatagcttttcctcgat
taaataatttaagattttgattattacctccttcattatttttgttatttatttcttcta
tagttgaaataggtgtaggggctggatgaacggtttatccgccattagcttctagtatag
gtcatgctggaagatctgttgattttgctattttttctttacatttagctggggcttctt
ctattttaggagcgattaattttatttctactatttttaatatacgatcatatggaatga
cttttgaaaaggttcctttatttgtttggtctgtgttgattactgttgtattattattat
tatctttacctgtattggctggtgctattacaatattgttaactgatcgaaattttaata
cttcattttttgatccagctggaggtggagatcctattttatttcaacattta
>SMNKARA08387_Inermocoelotes_inermis_8y22E_48y55N_ad_m_A_Agelenidae
ctttgtatttgatttttggagcttgatctgctatagttggtacagctatgagagttttga
ttcggattgaattaggtcaaccaggaagatttttaggtgatgatcatttatataatgtta
ttgttactgctcatgcttttgttatgattttttttatagtaatacctattttaattggag
gttttggaaactgattagttcctttaatattaggggctccagatatagcttttcctcgaa
taaataatttgagtttttgattattacctccttcattatttttattgtttatttcttcaa
tagttgaaataggtgtaggtgctggatgaacaatttatcctccattggcttctataatgg
gtcatgctggaagttctgttgattttgttattttttctttacatttagcgggggcttcct
ctattttaggagctattaattttatttctactatttttaatatacggtcatatggaataa
cttttgagaaagttcctttatttgtgtggtcagtattgattactgttgtgttattattgt
tgtctttacctgtattagcaggggctattacaatattattaactgatcgtaactttaata
cttcgttttttgatccagctggaggtggtgatcctattttatttcaacatttg
>SMNKARA08388_Inermocoelotes_inermis_8y22E_48y55N_ad_m_A_Agelenidae
nnnnnnnnnnnnnnnttggagcttgatctgctatagttggtacagctatgagagttttga
ttcggattgaattaggtcaaccaggaagatttttaggtgatgatcatttatataatgtta
ttgttactgctcatgcttttgttatgattttttttatagtaatacctattttaattggag
gttttggaaactgattagttcctttaatattaggggctccagatatagcttttcctcgaa
taaataatttgagtttttgattattacctccttcattatttttattgtttatttcttcaa
tagttgaaataggtgtaggtgctggatgaacaatttatcctccattggcttctataatgg
gtcatgctggaagttctgttgattttgttattttttctttacatttagcgggggcttcct
ctattttaggagctattaattttatttctactatttttaatatacggtcatatggaataa
ctttcgagaaagttcctttatttgtgtggtcagtattgattactgttgtgttattattgt
tgtctttacctgtattagcaggggctattacaatattattaactgatcgtaactttaata
cttcgttttttgatccagctggaggtggtgatcctattttatttcaacatttg
>SMNKARA08389_Inermocoelotes_inermis_8y22E_48y55N_ad_m_A_Agelenidae
ctttgtatttgatttttggagctgattctgctatagttggtacagctatgagagttttga
ttcggattgaattaggtcaaccaggaagatttttaggtgatgatcatttatataatgtta
ttgttactgctcatgcttttgttatgattttttttatagtaatacctattttaattggag
gttttggaaactgattagttcctttaatattaggggctccagatatagcttttcctcgaa
taaataatttgagtttttgattattacctccttcattatttttattgtttatttcttcaa
tagttgaaataggtggaggtgctggatgaacaatttatcctccattggcttctataatgg
gtcatgcgggaagttctgttgattttgttattttttctttacatttagcgggggcttcct
ctattttaggagctattaattttatttctactatttttaatatacggtcatatggaataa
ctttcgagaaagttcctttatttgtgtggtcagtattgattactgttgtgttattattgt
tgtctttacctgtattagcaggggctattacaatattattaactgatcgtaactttaata
cttcgttttttgatccagctggaggtggtgatcctattttatttcaacatttt
>SMNKARA08391_Alopecosa_pulverulenta_8y22E_48y55N_ad_m_A_Lycosidae
ctttatatttaatattaggtgtttgatcggctataataggaactgctatatcagtattaa
ttcgaatggaattaggtaatcctggaagtttattgggagatgatcatttatataatgtta
tagttactgctcatgcttttgtaatgattttttttatagtaataccaattcttattggtg
ggtttggtaattgattagttcctttaatattaggagcccctgatatatcatttcctcgta
taaataatctttctttttgattattacctccttctttatttttgttatgtatatcttcta
tagtagaaataggggtaggagctggttgaactgtttatcctcctttggcatcgagaatag
gtcatacaggaagttctatggattttgctattttttctcttcatttagctggggcttctt
ctattataggagcagtaaattttatttctactattattaatatacgaatattaggtatat
caatagagaaagttcctttatttgtttgatcagttttaattacagcagttttattattac
tttccttacctgttttagcaggtgctattactatattattaactgatcgaaattttaata
cttctttttttgatccagcaggtggaggggatcctattttatttcaacattta
>SMNKARA08392_Alopecosa_pulverulenta_8y22E_48y55N_ad_m_A_Lycosidae
ctttatatttaatattaggtatttgatcggctataataggaactgctatatcagtattaa
ttcgaatggaattaggtaatcctggaagtttattgggagatgatcatttatataatgtta
tagttactgctcatgcttttgtaatgattttttttatagtgataccaattcttattggtg
ggtttggtaattgattagttcctttaatattaggagctcctgatatatcatttcctcgta
taaataatctttctttttgattattacctccttctttatttttgttatgtatatcttcta
tagtagaaataggggtaggagctggttgaactgtttatcctcctttggcatcgagaatag
gtcatacaggaagttctatggattttgctattttttctcttcatttagctggggcttctt
ctattataggagcagtaaattttatttctactattattaatatacgaatattaggtatat
caatagagaaagttcctttatttgtttgatcagttttaattacagcagttttattattac
tttctttacctgttttagcaggtgctattactatattattaactgatcgaaattttaata
cttctttttttgatccagcaggtggaggggatcctattttatttcaacattta
>SMNKARA08393_Pardosa_pullata_8y22E_48y55N_ad_m_A_Lycosidae
ctttatatttaatgtttggagtttgatcagctataataggaactgctataagagtgttaa
ttcgaatagaattaggaaatcctggaagattgttaggtgatgatcatttatataatgtta
tagttactgctcatgcttttgtaataattttttttatagtaataccaattcttattggag
gttttggaaattgattagttccattaatattaggagctccagatatatcatttcctcgaa
taaataatctttctttttgattattacctccttctttatttttattatctatatcttcta
tagtagaaataggggttggtgctgggtgaactgtttatcctcctttagcatctacagttg
gtcatataggaaattcaatggattttgctattttttctcttcatttggctggggcttctt
ctattataggggctgtgaattttatttctactattattaatatacgaatattgggaatat
cttttgaaaaggttcctctttttgtttgatcagttttaattacagcggtattgttattac
tttctttacctgttttagcaggtgctattactatattattaacggatcgaaattttaata
cttctttttttgaccctgctggtggaggggatcctattttatttcaacattta
>SMNKARA08394_Trochosa_terricola_8y22E_48y55N_ad_m_A_Lycosidae
ctttgtatttaatgtttggagcatgatctgctatagtgggaactgctataagagtgttga
ttcgtttagaattagggaattctggaagtttattaggggatgatcatttatataatgtta
tggttacagctcatgcttttgtgatgattttttttatagtaataccaattcttattggag
gttttggaaattgattaattcctttaatattaggtgctcctgatatatcgtttcctcgaa
taaataatctttctttttggttattacctccttctttatttttattatctatgtcttcta
tggtggaaataggagtgggggctggttgaacagtttatcctcctttagcatctagagtgg
gtcatatggggagttctatagattttgctattttttctcttcatttagctggtgcttctt
ctattataggagcagtaaattttatttctactattattaatatacgaatattaggtatat
ctatagataaagtacctttatttgtttgatcagttttgattacggctgttttattattat
tatctttacctgttttagcgggtgctattactatattattaactgatcgaaattttaata
cttctttttttgaccctgcagggggaggggatcctattttatttcaacattta
>SMNKARA08395_Trochosa_terricola_8y22E_48y55N_ad_m_A_Lycosidae
nnnnnnnnnnnntgtttggtgcatgatctgctatagtgggaactgctataagagtgatga
ttcgtttagaattagggaattctggaagtttattaggggatgatcatttatataatgtta
tggttacagctcatgcttttgtgatgattttttttatagtaataccaattcttattggag
gttttggaaattgattaattcctttaatattaggtgctcctgatatatcgtttcctcgaa
taaataatctttctttttggttattacctccttctttatttttattatctatgtcttcta
tggtggaaataggagtgggggctggttgaacagtttatcctcctttagcatctagagtgg
gtcatatggggagttctatagattttgctattttttctcttcatttagctggtgcttctt
ctattataggagcagtaaattttatttctactattattaatatacgaatattaggtatat
ctatagataaagtacctttatttgtttgatcagttttgattacggctgttttattattat
tatctttacctgttttagcgggtgctattactatattattaactgatcgaaattttaata
cttctttttttgaccctgcagggggaggggatcctattttatttcaacattta
>SMNKARA08398_Trochosa_terricola_8y22E_48y55N_ad_m_A_Lycosidae
ctttgtatttaatgtttggtgcatgatctgctatagtgggaactgctataagagtgttga
ttcgtttagaattagggaattctggaagtttattaggggatgatcatttatataatgtta
tggttacagctcatgcttttgtgatgattttttttatagtaataccaattcttattggag
gttttggaaattgattaattcctttaatattaggtgctcctgatatatcgtttcctcgaa
taaataatctttctttttggttattacctccttctttatttttattatctatgtcttcta
tggtggaaataggagtgggggctggttgaacagtttatcctcctttagcatctagagtgg
gtcatatagggagttctatagattttgctattttttctcttcatttagctggtgcttctt
ctattataggagcagtaaattttatttctactattattaatatacgaatattaggtatat
ctatggataaagtacctttatttgtttgatcagttttgattacggctgttttattattat
tatctttacctgttttagcgggtgctattactatactattaactgatcgaaattttaata
cttctttttttgaccctgcagggggaggggatcctattttatttcaacattta
>SMNKARA08399_Trochosa_terricola_8y22E_48y55N_ad_f_A_Lycosidae
ctttgtatttaatgtttggtgtatgatctgctatagtgggaactgctataagagtattga
ttcgtttagaattagggaattctggaagtttattaggggatgatcatttatataatgtta
tggttacagctcatgcttttgtgatgattttttttatagtaataccaattcttattggag
gttttggaaattgattaattcctttaatattaggtgctcctgatatatcgtttcctcgaa
taaataatctttctttttggttattacctccttctttatttttattatctatgtcttcta
tggtggaaataggagtgggggctggttgaacagtttatcctcctttagcatctagagtgg
gtcatatagggagttctatagattttgctattttttctcttcatttagctggtgcttctt
ctattataggagcagtaaattttatttctactattattaatatacgaatattaggtatat
ctatagataaagtacctttatttgtttgatcagttttgattacggctgttttattattat
tatctttacctgttttagcgggtgctattactatattattaactgatcgaaattttaata
cttctttttttgatcctgcagggggaggggatcctattttatttcaacattta
>SMNKARA08402_Trochosa_spinipalpis_8y22E_48y55N_ad_m_A_Lycosidae
ctttatatttaatgtttggtgcatgatctgctatagtggggactgctataagagtgttaa
ttcgtttggaattagggaattctggaagtttattaggagatgatcatttatataatgtta
tggttacagctcatgcttttgtgatgattttttttatggtaatgccaattcttattggag
gttttggaaattgattaattcctttaatattaggtgctcctgatatatcgttccctcgaa
taaataatctttctttttggttactacctccttctttatttttattgtctatgtcttcta
tagtagaaataggggtgggagctggttggacagtttatcctcctttagcatctagagtgg
gtcatatagggagttctatagattttgctattttttctcttcatttagctggtgcttctt
ctattataggggcagtaaattttatttctactattattaatatacgaatattaggtatat
ctatagataaagtacctttatttgtttgatcagttttgattacagctgttttattattat
tgtctttacctgttttagcgggtgctattactatgttattgactgatcgaaattttaata
cttctttttttgatcctgcaggagggggggatcctattttatttcaacattta
>SMNKARA08403_Trochosa_terricola_8y22E_48y55N_ad_m_A_Lycosidae
ctttgtatttaatgtttggtgcatgatctgctatagtgggaactgctataagagtgttga
ttcgtttagaattagggaattctggaagtttattaggggatgatcatttatataatgtta
tggttacagctcatgcttttgtgatgattttttttatagtaataccaattcttattggag
gttttggaaattgattaattcctttaatattaggtgctcctgatatatcgtttcctcgaa
taaataatctttctttttggttattacctccttctttatttttattatctatgtcttcta
tggtggaaataggagtgggggctggttgaacagtttatcctcctttagcatctagagtgg
gtcatatggggagttctatagattttgctattttttctcttcatttagctggtgcttctt
ctattataggagcagtaaattttatttctactattattaatatacgaatattaggtatat
ctatagataaagtacctttatttgtttgatcagttttgattacggctgttttattattat
tatctttacctgttttagcgggtgctattactatattattaactgatcgaaattttaata
cttctttttttgaccctgcagggggaggggatcctattttatttcaacattta
>SMNKARA08406_Alopecosa_pulverulenta_8y22E_48y55N_ad_m_A_Lycosidae
ctttatatttaatattaggtgtttgatcggctataataggaactgctatatcagtattaa
ttcgaatggaattaggtaatcctggaagtttattaggagatgatcatttatataatgtta
tagttactgctcatgcttttgtaatgattttttttatagtaataccaattcttattggtg
ggtttggtaattgattagttcctttaatattaggagcccctgatatatcatttcctcgta
taaataatctttctttttgattattacctccttctttatttttgttatgtatatcttcta
tagtagaaataggggtaggagctggttgaactgtttatcctcctttggcatcgagaatag
gtcatacaggaagttctatggattttgctattttttctcttcatttagctggggcttctt
ctattataggagcagtaaattttatttctactattattaatatacgaatattaggtatat
caatagagaaagttcctttatttgtttgatcagttttaattacagcagttttattattac
tttccttacctgttttagcaggtgctattactatattattaactgatcgaaattttaata
cttctttttttgatccagcaggtggaggggatcctattttatttcaacattta
>SMNKARA08408_Clubiona_comta_8y22E_48y55N_ad_m_A_Clubionidae
ctttatatttaatttttgggtcttgatctgctatagtagggacagctataagagtattaa
tccggatagagttaggacagtcgggtgcattattaggtgatgatcatttatataatgtag
tagtaactgctcatgcttttgttataattttttttatagttatacctattttgattggag
gatttggaaattgaatagttccaataatattaggagcgggagatatagcttttcctcgca
taaataatttaagattttggttattacctccttctttaatattattatttatttcttcta
tagctgaaataggagtaggggctggttgaactgtttatcctcctcttgcttctaatgtag
gccatataggaagtgctatagattttgctattttttcattgcatttagctggggcttctt
ctattatgggagcagtaaattttattactacaatcattaatatacgttctgtaggaataa
aaatagagaaagttcctttatttgtatgatctgtattaattacggcagtacttttattat
tatctttacctgtattggcaggtgctattactatattattaactgatcgaaattttaata
cttctttttttgatcctgcagggggaggtgatcctattttatttcaacattta
>SMNKARA08409_Zelotes_clivicola_8y22E_48y55N_ad_m_A_Gnaphosidae
ctttatatttattatttggttcatgggctgctatggtaggaactgctataagagtattaa
ttcgtatggaattaggtcaacctggaagatttatgggtgatgatcatttatataatgtta
ttgtgactgctcatgcatttgttatgattttttttatggttatgcctattttaattggtg
ggtttggaaattgattagttcctttgatactgggggctccagatatagcatttcctcgta
taaataatttgagtttttggctattgcctccttcattaatattattatttatttcgtcta
tggtagaaatgggagtaggtgctggttgaactgtatatccacctttggctccaaatatag
gtcattcgggaagagccatggattttgctattttttctttgcatttagcgggtgcttcat
cgattatgggagcaattaattttatttctactgtaattaatatgcgttctattggaataa
gtatggaaaaggttcctttatttgtatgatcagtatttattactgcggtattattattat
tatctttacctgtattagcgggtgctattactatattattaactgatcgtaattttaata
cttcgttttttgatcctgctggaggaggggatcctattttatttcaacattta
>SMNKARA08788_Neriene_clathrata_8y66E_49y33N_ad_f_A_Linyphiidae
cattatattttatttttggtgcttgagctgctatggtagggacagctataagagttttaa
ttcgaattgaattaggacaagttggaagaatattaggggatgatcaattgtataatgtaa
ttgtgacagctcatgcttttgtaataattttttttatagttataccaattttaattggtg
gatttggaaattgattagttcctttaatattaggagctccagatatagcttttcctcgta
taaataatttgagtttttgacttttacctccttctttgtttttgttatttatttcttcta
tagtggaaataggagtaggagcaggttgaacggtttatccacctctttcttcattagagg
ggcattctgggagatctgtggattttgctattttttctttacatttagcaggagcttctt
ctattatgggggcaattaattttatttctactatcttaaatatacgtgcttatggtatat
ctatggagagggtttctttatttgtttgatcagttttaattactgctgttttattattat
tatctcttccagttttggcaggggcaattactatattattaacagatcgaaattttaata
cttctttttttgatcctgcaggaggaggagatcctattttatttcaacattta
>SMNKARA08789_Metellina_mengei_8y66E_49y33N_ad_f_A_Tetragnathidae
cattatattttatttttggggcttgagctgctatagtgggtactgctataagagtgttaa
ttcgaattgaattagggcaatctggaagattgttaggagatgatcagttgtataatgtta
ttgttacagctcatgcttttgtaataattttttttatagtaatacctattttgattgggg
gtttcggaaattgactggttcctttaatgttgggggcacctgatatagcttttcctcgaa
taaataatttgagattttggttattacctccttcattttttttattgctagtttcttcta
tggttgatattggagtgggggcaggatgaactgtttatccgcctttggcggctttggatg
ggcatgctggtagctcaatagattttgctattttttctttacatttggctggggcttctt
caattatgggggctattaattttatttctactgttttgaatatacgttcttggggaataa
gaatagatagggttcctttgtttgtgtgatcagtattgattaccgctgttttgttacttt
tatctttaccggttttagctggggctattactatgttgttaactgatcgtaattttaata
cttctttttttgatccttcgggtgggggtgatcctattctttttcaacatttg
>SMNKARA08790_Metellina_mengei_8y66E_49y33N_ad_f_A_Tetragnathidae
cattatattttatttttggggcttgagctgctatagtgggtactgctataagagtgttaa
ttcgaattgaattagggcaatctggaagattgttaggagatgatcagttgtataatgtta
ttgttacagctcatgcttttgtaataattttttttatagtaatacctattttgattgggg
gtttcggaaattgactggttcctttaatgttgggggcacctgatatagcttttcctcgaa
taaataatttgagattttggttattacctccttcattttttttattgctagtttcttcta
tggttgatattggagtgggggcaggatgaactgtttatccgcctttggcggctttggatg
ggcatgctggtagctcaatagattttgctattttttctttacatttggctggggcttctt
caattatgggggctattaattttatttctactgttttgaatatacgttcttggggaataa
gaatagatagggttcctttgtttgtgtgatcagtattgattaccgctgttttgttacttt
tatctttaccggttttagctggggctattactatgttgttaactgatcgtaattttaata
cttctttttttgatccttcgggtgggggtgatcctattctttttcaacatttg
>SMNKARA08791_Typhochrestus_digitatus_8y66E_49y33N_ad_f_A_Linyphiidae
gtttatattttatttttggggcttgagctgctatagtaggtactgcaataagagtattaa
ttcgggttgagttgggtcaggttggtagattgttaggggatgatcagttatataatgtaa
ttgttactgctcatgcttttgttataattttttttatagtgatacctatcttgattgggg
ggtttggaaattggttagtgcctttgatgttgggggctcctgatatagcttttcctcgta
taaataatttaagattttgattgttaccaccttctttgttgttattgtttatttctagaa
tagatgaaataggagttggagcggggtgaacagtttatccaccgcttgcttctttggagg
gtcattctggtagttcggtagattttgccattttttctttacatttagctggagcgtctt
ctattataggggcaattaattttatttctactattttaaatatacgagggtacgggataa
ctatagagaaagttcctttatttgtttggtctgttttaattacggctgttttattattat
tgtctttgccggttttagctggggctattactatgcttttaactgatcgaaattttaaca
cttcattttttgacccggctgggggaggagaccctgttttatttcaacattta
>SMNKARA08792_Minyriolus_pusillus_8y66E_49y33N_ad_f_A_Linyphiidae
gtttatattttatttttggggcttgggcggctatagtaggtacagcaataagagtattga
ttcgcattgagttaggtcagactgggagattattaggggacgatcagttatataatgtta
ttgttaccgcgcatgcttttgttataattttttttatagtgatgcctattttaattggtg
ggtttggtaattgattagtacctttaatgttaggggcgccagatatagcttttcctcgaa
taaataatttgagtttttggttattacctccttctttattattattgtttatttctagaa
tagatgaaataggagtgggagcaggatgaactgtgtatcctcctcttgcttctttagaag
gacattctggaagatctgtagattttgccattttctctttacacttggcgggggcgtcat
caattataggggctatcaattttatttccactattctgaatatgcggggatatgggatga
ctatggaaaaagttcctttatttgtttgatctgttttaattacggctgttttgttacttt
tatctttgccggttttagcaggggcatnnnnnnnnnnnnnnnnnnnnnnnnnnnnnnnnn
nnnnnnnnnnnnnnnnnnnnnnnnnnnnnnnnnnnnnnnnnnnnnnnnnnnnn
>SMNKARA08794_Bolyphantes_alticeps_8y22E_48y55N_ad_f_A_Linyphiidae
ctttatattttatttttggggcgtgagctgctatggtggggactgctataagagtattga
ttcgaattgaattgggtcagacgggaagaatgttaggagatgatcaattgtataatgtta
ttgttacagcacatgcttttgttataattttttttatagtaatgccaattttaattggag
ggtttggaaattgattggttcctttaatgttgggggctcctgatatagcttttcctcgaa
taaataacttgagtttttggttattacccccctctctacttttattatttatttcaagta
tggttgagataggggttggggctggatgaactgtgtatcctccacttgcttctttagagg
gacatgctggtagttctgttgattttgctattttttctcttcatttagccggggcttctt
caattataggtgctattaattttatctcgactattattaatatgcgggggtatggagttt
ctatagaaaaagttcctctttttgtgtgatctgtattaattacggctgttttgttacttt
tatctcttcctgttttagcaggagcaattacaatattattaacagatcgcaattttaata
cttctttttttgacccagctggaggaggtgatccagttttgtttcaacattta
>SMNKARA08795_Bolyphantes_alticeps_8y22E_48y55N_ad_f_A_Linyphiidae
ctttatattttatttttggggcgtgagctgctatggtggggactgctataagagtattga
ttcgaattgaattgggtcagacgggaagaatgttaggagatgatcaattgtataatgtta
ttgttacagcacatgcttttgttataattttttttatagtaatgccaattttaattggag
ggtttggaaattgattggttcctttaatgttgggggctcctgatatagcttttcctcgaa
taaataacttgagtttttggttattacccccctctctacttttattatttatttcaagta
tggttgagataggggttggggctggatgaactgtgtatcctccacttgcttctttagagg
gacatgctggtagttctgttgattttgctattttttctcttcatttagccggggcttctt
caattataggtgctattaattttatctcgactattattaatatgcgggggtatggagttt
ctatagaaaaagttcctctttttgtgtgatctgtattaattacggctgttttgttacttt
tatctcttcctgttttagcaggagcaattacaatattattaacagatcgcaattttaata
cttctttttttgacccagctggaggaggtgatccagttttgtttcaacattta
>SMNKARA08796_Ceratinella_brevis_8y22E_48y55N_ad_f_A_Linyphiidae
gtttatattttatttttggagcttgagctgctatagtagggacagcaataagagtattga
ttcgtgttgagttaggacaaattggaagattattaggggatgatcagttgtataatgtta
ttgttacggctcatgcttttgttataattttttttatggtgatacctattttaattggtg
gttttgggaattgattggttcctttaatgttgggggcacctgatatagcttttcctcgaa
taaataatttaagattttgattattacctccttctttattattattatttatttctagaa
tagatgagatgggggtaggagcggggtgaactatttatcctcctcttgcttctttagaag
ggcattctggaagatcagtagattttgctattttttctttacatttagcaggagcgtcat
caattataggtgctattaattttatttctactattttaaacatacgggggtatgggataa
caatagaaaaagttcctttatttgtttgatctgttttaattacggctgttttattacttt
tgtctttaccagtattagctggggcgattactatgcttttaacagatcgaaattttaata
catcattttttgatccagcgggtggaggggatccggttttatttcaacattta
>SMNKARA08797_Bolyphantes_alticeps_8y22E_48y55N_ad_m_A_Linyphiidae
ctttatattttatttttggggcgtgagctgctatggtggggactgctataagagtattga
ttcgaattgaattgggtcagacgggaagaatgttaggagatgatcaattgtataatgtta
ttgttacagcacatgcttttgttataattttttttatagtaatgccaattttaattggag
ggtttggaaattgattggttcctttaatgttgggggctcctgatatagcttttcctcgaa
taaataacttgagtttttggttattacccccctctctacttttattatttatttcaagta
tggttgagataggggttggggctggatgaactgtgtatcctccacttgcttctttagagg
gacatgctggtagttctgttgattttgctattttttctcttcatttagccggggcttctt
caattataggtgctattaattttatctcgactattattaatatgcgggggtatggagttt
ctatagaaaaagttcctctttttgtgtgatctgtattaattacggctgttttgttacttt
tatctcttcctgttttagcaggagcaattacaatattattaacagatcgcaattttaata
cttctttttttgacccagctggaggaggtgatccagttttgtttcaacattta
>SMNKARA08798_Bolyphantes_alticeps_8y22E_48y55N_ad_f_A_Linyphiidae
ctttatattttatttttggggcgtgagctgctatggtggggactgctataagagtattga
ttcgaattgaattgggtcagacgggaagaatgttaggagatgatcaattgtataatgtta
ttgttacagcacatgcttttgttataattttttttatagtaatgccaattttaattggag
ggtttggaaattgattggttcctttaatgttgggggctcctgatatagcttttcctcgaa
taaataacttgagtttttggttattacccccctctctacttttattatttatttcaagta
tggttgagataggggttggggctggatgaactgtgtatcctccacttgcttctttagagg
gacatgctggtagttctgttgattttgctattttttctcttcatttagccggggcttctt
caattataggtgctattaattttatctcgactattattaatatgcgggggtatggagttt
ctatagaaaaagttcctctttttgtgtgatctgtattaattacggctgttttgttacttt
tatctcttcctgttttagcaggagcaattacaatattattaacagatcgcaattttaata
cttctttttttgacccagctggaggaggtgatccagttttgtttcaacattta
>SMNKARA08799_Centromerus_dilutus_8y22E_48y55N_ad_f_A_Linyphiidae
nnnnnnnnnnnnnnnnnnnnnnnnnnnnnnnnnnnnnnnnnnnnnnnnnnnnnnnnnnnn
nnnnnnnnnnnnnnnnnnnnnnnnnnnnnnnnttaggtgatgatcaattgtataatgtta
ttgttactgctcatgattttgttatgattttttttatagtaatacctattttaattgggg
ggtttggtaactggctagttcctttaatgtggggggctccagatatagcatttcctcgta
taaataatttaagtttttggttattacctccttctttatttttattattcatttcttcta
tggtagaaatgggggtaggggcaggatggactatttatcctccctttgcttccttagaag
gacattctggaagttctgtggattttgctattttctctcttcatttagctggggcgtcat
ctattataggggcgattaattttatttctactattattaatatacgtacttatggtataa
gaatggagaaagtctctttatttgtatgggctgttttaattacggcggttcttttattgt
tatcgttgcctgtgctggcgggggctattactatactattaacagatcgtagttttaata
catctttttttgatcctgcaggagggggggatcctattnnnnnnnnnnnnnnn
>SMNKARA08800_Centromerita_bicolor_8y22E_48y55N_ad_m_A_Linyphiidae
gtttatatttaatttttggtgcttgggctgccatagttggaactggtataagagttttga
tccgggtagagttaggacaggtagggagaatattaggtgatgatcaattgtataatgtta
ttgttactgctcatgcttttgttataattttttttatagttatgcctattttgattgggg
gattcggaaattggttagttcctttaatattgggggctcctgatatagcttttccacgaa
taaataatttaagtttttggttattgcccccatcgctgtttttattgtttatttcttcta
tagtggaaataggagtaggggctggatgaactatttatcctcctttagcttctttggagg
ggcattctggaagttctgtggattttgctattttttctcttcatttagcgggagcatcat
ctattataggggctattaattttatttctactattattaacatgcgtacttatggtataa
gtatagaaagggtttctttatttgtttgatctgttttgattacggcagttcttttgttat
tatcattgcctgttcttgcaggggccatcaccatactattaacagatcgtaattgtaata
cttctttttttgatcctgctggaggtggggatcctattttgtttcaacattta
>SMNKARA08801_Centromerita_bicolor_8y22E_48y55N_ad_m_A_Linyphiidae
gtttatatttaatttttggtgcttgggctgccatagttggaactggtataagagttttga
tccgggtagagttaggacaggtagggagaatattaggtgatgatcaattgtataatgtta
ttgttactgctcatgcttttgttataattttttttatagttatgcctattttgattgggg
gattcggaaattggttagttcctttaatattgggggctcctgatatagcttttccacgaa
taaataatttaagtttttggttattgcccccatcgctgtttttattgtttatttcttcta
tagtggaaataggagtaggggctggatgaactatttatcctcctttagcttctttggagg
ggcattctggaagttctgtggattttgctattttttctcttcatttagcgggagcatcat
ctattataggggctattaattttatttctactattattaacatgcgtacttatggtataa
gtatagaaagggtttctttatttgtttgatctgttttgattacggcagttcttttgttat
tatcattgcctgttcttgcaggggccatcaccatactattaacagatcgtaattttaata
cttctttttttgatcctgctggaggtggggatcctattttgtttcaacattta
>SMNKARA08802_Evansia_merens_8y22E_48y55N_ad_f_A_Linyphiidae
gtttatattttgtttttggtgcttgatctgctatagtgggaacggcaataagagtattga
ttcggattgagttagggcaaactggaagtttgttgggggatgatcagctttataatgtta
ttgttactgcgcatgcttttgttataattttttttatagtgatgcctattttaattgggg
ggtttggaaactggttagttcctttgatattgggggctcctgatatggcttttccccgaa
tgaataatttaagattttggttgttacctccttccttgtttttattgtttatttctagaa
tagatgagatagggatgggggctgggtgaactgtgtatcctcctttagcttctttggaag
ggcattctgggagatcggtagattttgctattttttctttgcatttagctggtgcgtcgt
caattataggggctatcaattttatttctactattttaaatatacgggggtatgggatga
ctttggagaaagttcctttgtttgtttggtctgtcttaattacggctgttttattgttat
tgtctttacctgtgttagcaggggctattactatacttttaacagatcgaaattttaata
cttcattttttgacccgtcagggggaggggatccggttttgtttcaacattta
>SMNKARA08803_Gonatium_paradoxum_8y22E_48y55N_ad_m_A_Linyphiidae
nnnnnnnnnnnnnnnnnnnnnnnnnnnnnnnnntagtaggtacggcaataagagtattaa
ttcgaattgaattgggtcaggttggtagattgttaggggatgatcaggtatataatgtta
ttgttactgctcatgcttttgttataattttttttatagtgatacctattttaattggtg
ggtttggtaattgattagttcctttaatattaggggctcctgatatggcttttcctcgta
taaataatctgagattttgattattacccccttccttgttattgttatttatttctagaa
tagatgaaatgggggtaggggctgggtggactgtgtatccgcctcttgcttctttagagg
ggcattctggtagctctgtggattttgctattttttcattacatttagctggggcatcat
ctattatgggggctattaattttatttctactatttttaatatacgaggatatgggataa
caatagaaaaagttcctttgtttgtttgatctgtcttgattacagctgtgttattattat
tgtcattacctgttttggcgggagctattacaatgcttttgacggatcgtaattttaata
cgtctttttttgatcctgctgggggtggagatcctgtattatttcaacattta
>SMNKARA08804_Gonatium_paradoxum_8y22E_48y55N_ad_m_A_Linyphiidae
gtttgtattttgtttttggggcttgagctgcgatagtaggtacggcaataagagtattaa
ttcgaattgaattgggtcaggttggtagattgttaggggatgatcaggtatataatgtta
ttgttactgctcatgcttttgttataattttttttatagtgatacctattttaattggtg
ggtttggtaattgattagttcctttaatattaggggctcctgatatggcttttcctcgta
taaataatctgagattttgattattacccccttccttgttattgttatttatttctagaa
tagatgaaatgggggtaggggctgggtggactgtgtatccgcctcttgcttctttagagg
ggcattctggtagctctgtggattttgctattttttcattacatttagctggggcatcat
ctattatgggggctattaattttatttctactatttttaatatacgaggatatgggataa
caatagaaaaagttcctttgtttgtttgatctgtcttgattacagctgtgaaattattat
tgtcattacctgttttggcgggagctattacaatgcttttgacggatcgtaattttaata
cgtctttttttgatcctgctgggggtggagatcctgtattatttcaacattta
>SMNKARA08805_Gonatium_paradoxum_8y22E_48y55N_ad_m_A_Linyphiidae
gtttgtattttgtttttggggcttgagctgctatagtaggtacggcaataagagtattaa
ttcgaattgaattgggtcaggttggtagattgttaggggatgatcaggtatataatgtta
ttgttactgctcatgcttttgttataattttttttatagtgatacctattttaattggtg
ggtttggtaattgattagttcctttaatattaggggctcctgatatggcttttcctcgta
taaataatctgagattttgattattacccccttccttgttattgttatttatttctagaa
tagatgaaatgggggtaggggctgggtggactgtgtatccgcctcttgcttctttagagg
ggcattctggtagctctgtggattttgctattttttcattacatttagctggggcatcat
ctattatgggggctattaattttatttctactatttttaatatacgaggatatgggataa
caatagaaaaagttcctttgtttgtttgatctgtcttgattacagctgtgttattattat
tgtcattacctgttttggcgggagctattacaatgcttttgacggatcgtaattttaata
tgtctttttttgatcctgctgggggtggagatcctgtattatttcaacattta
>SMNKARA08806_Palliduphantes_ericaeus_8y22E_48y55N_ad_f_A_Linyphiidae
cattatattttatttttggggcttgagctgctatagtagggactgctataagagtgctaa
ttcgaatcgaattaggacaaacaggaagaatattgggggatgatcagctttataatgtta
ttgtaacagcccatgcttttgttataattttttttatagttatacctattttaattggag
ggtttggtaattggcttgttcctttgatgcttggggccccggacatagcgtttccccgga
tgaataatttgagattttggctactcccaccttcattattgttattatttatttctagaa
tggtggagataggagtaggggcgggatggactgtttacccccccttggcttcgttagagg
ggcatgcaggtagatctgtagattttgctattttttctttgcatttagctggggcttctt
caattatgggggctatcaattttatttctacaattattaatatacgaggaagaggggttg
ctatagaaaaggttcctctatttgtgtgatccgtattaattacggctgtgttattgttgt
tgtctttacctgtgttggcaggggctattactatgttgttaactgatcgaaattttaata
catctttttttgaccctgcagggggaggggatcctgttttatttcaacactta
>SMNKARA08808_Saaristoa_abnormis_8y22E_48y55N_ad_m_A_Linyphiidae
cattatattttatttttggggcttgagctgctatagtagggacggcgataagagttttaa
ttcgagttgagttaggtcaaattggaagcttactaggagatgatcaattatataatgtta
ttgttacggctcatgcttttgttataattttttttatagttatacctattttaattggtg
gattcggaaattggttagtaccattaatattgggagctcctgatatagcttttcctcgaa
taaataatctaagattttgacttttacctccttctttattattattatttatttcaagta
tagatgagataggtgtaggagcgggatgaactatttatccccctctcgcttctttagaag
gacattcaggaagttctgtagattttgctattttttctttacatttggctggggcatctt
ctattatgggggctattaattttatttctactattgtaaatatacgagggtatgggatat
ctatagaaaaagtgcctttatttgtttgatctgtattaattacagccgttttgttattgt
tatctttacctgtgttagctggtgctattactatattattaacagatcgaaattttaata
cttcattttttgatccatctggaggtggggatcctattttatttcaacatcta
>SMNKARA08809_Saaristoa_abnormis_8y22E_48y55N_ad_m_A_Linyphiidae
cattatattttatttttggggcttgagctgctatagtagggacggcgataagagttttaa
ttcgagttgagttaggtcaaattggaagcttactaggagatgatcaattatataatgtta
ttgttacggctcatgcttttgttataattttttttatagttatacctattttaattggtg
gattcggaaattggttagtaccattaatattgggagctcctgatatagcttttcctcgaa
taaataatctaagattttgacttttacctccttctttattattattatttatttcaagta
tagatgagataggtgtaggagcgggatgaactatttatccccctctcgcttctttagaag
gacattcaggaagttctgtagattttgctattttttctttacatttggctggggcatctt
ctattatgggggctattaattttatttctactattgtaaatatacgagggtatgggatat
ctatagaaaaagtgcctttatttgtttgatctgtattaattacagccgttttgttattgt
tatctttacctgtgttagctggtgctattactatattattaacagatcgaaattttaata
cttcattttttgatccatctggaggtggggatcctattttatttcaacatcta
>SMNKARA08810_Saaristoa_abnormis_8y22E_48y55N_ad_m_A_Linyphiidae
cattatattttatttttggggcttgagccgctatagtagggacggcgataagagttttaa
ttcgagttgagttaggtcaaattggaagcttactaggagatgatcaattatataatgtta
ttgttacggctcatgcttttgttataattttttttatagttatacctattttaattggtg
gattcggaaattggttagtaccattaatattgggagctcctgatatagcttttcctcgaa
taaataatctaagattttgacttttacctccctctttattattattatttatttcaagta
tagatgagataggtgtaggagcgggatgaactgtttatccccctctcgcttctttagaag
ggcattcaggaagttctgtagattttgctattttttctttacatttggctggggcatctt
ctattataggggctattaattttatttctactattgtaaatatacgagggtatggaatat
ctatagaaaaagtgcctttatttgtttgatctgtattaattacagccgttttattattat
tatctttacctgtgttagctggtgctattactatattattaacagatcgaaattttaata
cttcattttttgatccatctggaggtggagatcctattttatttcaacatcta
>SMNKARA08811_Maso_sundevalli_8y22E_48y55N_ad_m_A_Linyphiidae
gtttatattttgtgtttggtgcgtgagctgccatagtgggtacggcgatgagagtattaa
ttcgaattgagttgggacagactggtagattattaggggatgaccagttgtataacgtta
ttgttactgctcatgcttttgttatgattttttttatggttatacctattttaattgggg
ggtttgggaattggttagtaccgttgatgttgggagctccagatatagctttcccccgca
taaacaacttgagattttgattgttgcccccttctttattattattatttatttctagaa
tagatgagataggggtgggggcaggttgaactgtttatccaccgcttgcttctttagagg
ggcattctgggagttcagtagattttgctattttttctcttcatttagctggggcatcgt
ctattatgggggctattaattttatttctactattattaatatgcggggttatggtataa
ctatagaaaaggtccccttatttgtatggtctgtattaattacagcagtattattgttgt
tatctttgccagttttagcaggagcgattactatgcttttaacagatcgaaactttaata
cttctttttttgaccctgcgggaggaggggatcctgttttgtttcaacactta
>SMNKARA08812_Maso_sundevalli_8y22E_48y55N_ad_f_A_Linyphiidae
gtttatattttgtgtttggtgcgtgagctgccatagtgggtacggcgatgagagtattaa
ttcgaattgagttgggacagactggtagattattaggggatgaccagttgtataacgtta
ttgttactgctcatgcttttgttatgattttttttatggttatacccattttaattgggg
ggtttgggaattggttagtaccgttgatgttgggagctccagatatagctttcccccgca
taaacaacttgagattttgattgttgcccccttctttattattattatttatttctagaa
tagatgagataggggtgggggcaggttgaactgtttatccaccgcttgcttctttagagg
ggcattctgggagttcagtagattttgctattttttctcttcatttagctggggcatcgt
ctattatgggggctattaattttatttctactattattaatatgcggggttatggtataa
ctattgaaaaggtccccttatttgtatggtctgtattaattacagcagtattattgttgt
tatctttgccagttttagcaggagcgattactatgcttttaacagatcgaaactttaata
cttctttttttgaccctgcgggaggaggggatcctgttttgtttcaacactta
>SMNKARA08813_Maso_sundevalli_8y22E_48y55N_ad_m_A_Linyphiidae
gtttatattttgtgtttggtgcgtgagctgccatagtgggtacggcgatgagagtattaa
ttcgaattgagttgggacagactggtagattattaggggatgaccagttgtataacgtta
ttgttactgctcatgcttttgttatgattttttttatggttatacctattttaattgggg
ggtttgggaattggttagtaccgttgatgttgggagctccagatatagctttcccccgca
taaacaacttgagattttgattgttgcccccttctttattattattatttatttctagaa
tagatgagataggggtgggggcaggttgaactgtttatccaccgcttgcttctttagagg
ggcattctgggagttcagtagattttgctattttttctcttcatttagctggggcatcgt
ctattatgggggctattaattttatttctactattattaatatgcggggttatggtataa
ctatagaaaaggtccccttatttgtatggtctgtgttaattacagcagtattattgttgt
tatctttgccagttttagcaggagcgattactatgcttttaacagatcgaaactttaata
cttctttttttgaccctgcgggaggaggggaccctgttttgttccnacactta
>SMNKARA08814_Microlinyphia_pusilla_8y58E_48y89N_jv_f_A_Linyphiidae
ctttatattttatttttggagcttgagctgctatagtaggaactgctataagagtattaa
ttcgaattgaattggggcaaactggaagaatattaggggatgaccaattatataatgtta
ttgtcactgctcatgcatttgtaataattttttttatagtaatgccaattttaattgggg
gttttggaaattgactagtccctttaatgttaggggctcctgatatggcatttcctcgaa
taaataatttgagattttgattgttgcctccttccttatttttattatttatttcttcaa
tagtagaaatgggagtaggggcagggtgaactgtttatccccctttatcttctttagagg
gacattcaggtagttctgtagattttgctattttttccctccatttggcaggagcttctt
caattataggtgcaattaattttatttccactattttaaatatacgtgcttatggaatta
ctatagagaaggtttctttgtttgtgtgatctgttcttattactgcagtccttttattat
tgtctttacctgttttagcaggagctattaccatgttattaactgatcgaaattttaata
cttcctttttcgaccctgcgggaggaggagaccctattttatttcaacattta
>SMNKARA08815_Minyriolus_pusillus_8y22E_48y55N_ad_f_A_Linyphiidae
gtttatattttatttttggggcttgggcggctatagtaggtacagcaataagagtattga
ttcgcattgagttaggtcagactgggagattattaggggacgatcagttatataatgtta
ttgttaccgcgcatgcttttgttataattttttttatagtgatgcctattttaattggtg
ggtttggtaattgattagtacctttaatgttaggggcgccagatatagcttttcctcgaa
taaataatttgagtttttggttattacctccttctttattattattgtttatttctagaa
tagatgaaataggagtgggagcaggatgaactgtgtatcctcctcttgcttctttagaag
gacattctggaagatctgtagattttgccattttctctttacacttggcgggggcgtcat
caattataggggctatcaattttatttccactattctgaatatgcggggatatgggatga
ctatggaaaaagttcctttatttgtttgatctgttttaattacggctgttttgttacttt
tatctttgccggttttagcaggggcgattacaatacttttaacggatcgaaattttaaca
cttcgttttttgacccttctggagggggagatccagttttgtttcagcattta
>SMNKARA08816_Palliduphantes_pallidus_8y22E_48y55N_ad_m_A_Linyphiidae
cattatactttatttttggagcttgagctgctatagtgggaactgctataagagtattaa
ttcgaattgagttgggacaaacgggaagaatactaggggatgatcaactttataatgtta
ttgtgacagcgcatgcttttgttataattttttttatggtgatacctattttaattgggg
ggtttggaaattggcttgtacctttgatgcttggggctcccgatatagcatttcctcgaa
taaataatttgagattttggttacttcctccttcgttgctattattatttatttctagaa
tggtagagataggggtaggggctggatgaactgtttatcctcctttggcttctttagagg
gacatgcagggagttctgtggattttgctattttttctttacatttagctggggcttctt
caattataggggctattaattttatttctacaattattaatatgcggggaagaggagtta
caatagataaagttcctttatttgtttgatctgtattaattactgctgtgctattattgt
tatctttgccagtgttggcaggcgctattactatgttattaactgatcgaaattttaata
catctttttttgatcctgcgggaggtggggatcctgttttgtttcagcatctt
>SMNKARA08817_Palliduphantes_pallidus_8y22E_48y55N_ad_m_A_Linyphiidae
cattatattttatttttggagcttgagctgctatagtgggaactgctataagagtgttaa
ttcgaattgaattgggacaaacgggaagaatattaggggatgatcaactttataatgtta
ttgtgacagcgcatgcttttgttataattttttttatggtgatacctattttaattggag
ggtttggaaattggcttgtacctttgatgcttggagctcccgatatagcatttcctcgaa
taaataacttgagattttggttacttcctccttcattgctattattatttatttctagaa
tggtagagataggggtaggggctggatgaactgtttatcctcctttggcttctttagagg
gacatgcagggagttctgtggattttgctattttttctttgcatttagctggggcttctt
caattataggggctattaattttatttctacaattattaatatgcggggaagaggagtta
caatagataaagttcctttatttgtttgatctgtattaattactgctgtgttattattat
tatctttgccagtgttggcaggcgctattactttgttattaactgatcgaaattttaata
catctttttttgatcctgcgggaggtggggatcctgttttgtttcagcatctt
>SMNKARA08819_Saaristoa_abnormis_8y22E_48y55N_ad_m_A_Linyphiidae
cattatattttatttttggggcttgagctgctatagtagggacggcgataagagttttaa
ttcgagttgagttaggtcaaattggaagcttactaggagatgatcaattatataatgtta
ttgttacggctcatgcttttgttataattttttttatagttatacctattttaattggtg
gattcggaaattggttagtaccattaatattgggagctcctgatatagcttttcctcgaa
taaataatctaagattttgacttttacctccttctttattattattatttatttcaagta
tagatgagataggtgtaggagcgggatgaactatttatccccctctcgcttctttagaag
gacattcaggaagttctgtagattttgctattttttctttacatttggctggggcatctt
ctattatgggggctattaattttatttctactattgtaaatatacgagggtatgggatat
ctatagaaaaagtgcctttatttgtttgatctgtattaattacagccgttttgttattgt
tatctttacctgtgttagctggtgctattactatattattaacagatcgaaattttaata
cttcattttttgatccatctggaggtggggatcctattttatttcaacatcta
>SMNKARA08821_Saaristoa_abnormis_8y22E_48y55N_ad_m_A_Linyphiidae
cattatattttatttttggggcttgagccgctatagtagggacggcgataagagttttaa
ttcgagttgagttaggtcaaattggaagcttactaggagatgatcaattatataatgtta
ttgttacggctcatgcttttgttataattttttttatagttatacctattttaattggtg
gattcggaaattggttagtaccattaatattgggagctcctgatatagcctttcctcgaa
taaataatctaagattttgacttttacctccctctttattattattatttatttcaagta
tagatgagataggtgtaggagcgggatgaactgtttatccccctctcgcttctttagaag
ggcattcaggaagttctgtagattttgctattttttctttacatttggctggggcatctt
ctattataggggctattaattttatttctactattgtaaatatacgagggtatggaatat
ctatagaaaaagtgcctttatttgtttgatctgtattaattacagccgttttattattat
tatctttacctgtgttagctggtgctattactatattattaacagatcgaaattttaata
cttcattttttgatccatctggaggtggagatcctattttatttcaacatcta
>SMNKARA08822_Sintula_corniger_8y22E_48y55N_ad_m_A_Linyphiidae
ctttatatttagtgtttggaggctgggcttctatagttggaactgcgataagtgtattga
ttcgagttgagctggggcaagggggtagaatattaggggatgatcagctatataatgtta
ttgttactgctcatgcatttgttataattttttttatagtgataccaattttaattggag
gatttggaaattgattggtacctttgatgttaggggctcctgatatagcttttcctcgaa
taaataatttgagattttggcttttaccaccttccttgtttttactatttatttcttcta
tggtggaaataggtgtgggggcaggttgaacggtgtatcctcctttggcgtctttagaag
gacattctgggagttctgtggattttgctattttttctttacatttggctggggcatctt
ctattatgggggctattaattttatctctactattattaatatgcgagcacatggagttt
ctatagaaagggtttctctgtttgtttggtcagtgttaattactgctattttgttgctct
tgtctttacccgttttggctggggctattactatatttttaactgatcgtaattttaata
cgtctttttttgatccagctggggggggggatcctgttttatttcagcacttg
>SMNKARA08823_Tenuiphantes_alacris_8y22E_48y55N_ad_f_A_Linyphiidae
ctttatattttatttttggggcttgagctgctatagtgggcactgcgataagagtattaa
ttcgaattgagttagggcaaactggaagaatattgggggatgaccaattatataatgtta
ttgtgactgctcatgcttttgttataattttttttatggttatacctattttaattgggg
ggtttggaaattggttagtaccattaatattgggggctcctgacatggcttttccacgga
taaataatttaagattttggttgctacccccttctttattattattatttatttcaagaa
tagtagaaataggagttggagcaggttggacagtgtatccgcctcttgcttctttagaag
gtcatgccgggagttctgtggattttgctattttttcccttcatttagctggggcatctt
caattataggggctattaattttatttcgactattgtgaatatgcgtggatatggggttt
ctatggaaaaagttcctttatttgtgtgatctgttttaatcactgctgttttgttgttat
tatctctacctgtgttagcaggtgctattacgatattgttgactgttcgaaattttaaca
cttctttttttgatcctgctgggggaggagatcctgtgttatttcaacattta
>SMNKARA08825_Tenuiphantes_tenebricola_8y22E_48y55N_ad_m_A_Linyphiidae
ctttatattttatttttggagcgtgagctgctatagtaggaactgctataagagtattaa
ttcgaattgagttgggacaaactggaagtatattgggggatgatcagttgtataatgtta
ttgttactgctcatgcttttgttataattttttttatagttatacctattttaattgggg
gatttggaaattggttagtacctttaatacttggtgctcctgacatggctttccctcgaa
taaataatttaagattctggcttttacctccttctttattattattatttatttcaagta
tagttgaaataggagttggggcaggatgaacagtgtatcctccacttgcttctttagaag
gacatgcgggaagctctgttgattttgctattttttctcttcatttagctggggcttctt
ctattataggagcaattaattttatttctactatttttaatatacgtggatatggtgtgt
caatggaaaaggttccattgtttgtatgatctgttttgattactgccgttcttttattgt
tgtcattacctgttttagcaggtgctattactatacttttaactgaccgaaattttaata
cttctttttttgaccctgcagggggaggggatcccgtgttatttcaacactta
>SMNKARA08827_Tenuiphantes_alacris_8y22E_48y55N_ad_f_A_Linyphiidae
ctttatattttatttttggggcttgagctgctatagtgggcactgcgataagagtattaa
ttcgaattgagttagggcaaactggaagaatattgggggatgaccaattatataatgtta
ttgtgactgctcatgcttttgttataattttttttatggttatacctattttaattgggg
ggtttggaaattggttagtaccattaatattgggggctcctgacatggcttttccacgga
taaataatttaagattttggttgctacccccttctttattattattatttatttcaagaa
tagtagaaataggagttggagcaggttggacagtgtatccgcctcttgcttctttagaag
gtcatgccgggagttctgtggattttgctattttttcccttcatttagctggggcatctt
caattataggggctattaattttatttcgactattgtgaatatgcgtggatatggggttt
ctatggaaaaagttcctttatttgtgtgatctgttttaatcactgctgttttgttgttat
tatctctacctgtgttagcaggtgctattacgatattgttgactgatcgaaattttaaca
cttctttttttgatcctgctgggggaggagatcctgtgttatttcaacattta
>SMNKARA08828_Walckenaeria_alticeps_8y22E_48y55N_ad_f_A_Linyphiidae
gtttatattttatatttggagcttgggctgctatagtaggaacagcaataagagtattaa
ttcgaattgaattagggcaaggtggtagtttgttaggggacgatcagttatataatgtta
ttgttactgctcatgcttttgttataattttttttatagtaatacctattttaattggag
ggtttggtaattggttagttcctttgatattaggagctccggatatggcatttcctcgta
taaataatttaagattttgattattaccaccttctttattattattatttatttctagta
tggatgagatgggggtaggagcagggtgaactgtttatcctccacttgcttctttggaag
ggcattctggtagatcggtagattttgctattttttctttacatttagctggggcttctt
caattataggagctattaattttatttctactatttttaatatgcgggggtatggtataa
ctatagaaagggttcctttatttgtttggtctgttttgattacagctgtattattattat
tgtctttacctgtattagcaggtgctattactatacttttaacagatcgaaattttaata
cgtcattttttgatcctgcggggggaggggatcctgttttatttcaacattta
>SMNKARA08830_Walckenaeria_alticeps_8y22E_48y55N_ad_f_A_Linyphiidae
gtttatattttatatttggagcttgggctgctatagtaggaacagcaataagagtattaa
ttcgaattgaattagggcaaggtggtagtttgttaggggacgatcagttatataatgtta
ttgttactgctcatgcttttgttataattttttttatagtaatacctattttaattggag
ggtttggtaattggttagttcctttgatattaggagctccggatatggcatttcctcgta
taaataatttaagattttgattattaccaccttctttattattattatttatttctagta
tggatgagatgggggtaggagcagggtgaactgtttatcctccacttgcttctttggaag
ggcattctggtagatcggtagattttgctattttttctttacatttagctggggcttctt
caattataggagctattaattttatttctactatttttaatatgcgggggtatggtataa
ctatagaaagggttcctttatttgtttggtctgttttgattacagctgtattattattat
tgtctttacctgtattagcaggtgctattactatacttttaacagatcgaaattttaata
cgtcattttttgatcctgcggggggaggggatcctgttttatttcaacattta
>SMNKARA08831_Walckenaeria_alticeps_8y22E_48y55N_ad_f_A_Linyphiidae
gtttatattttatatttggagcttgggctgctatagtaggaacagcaataagagtattaa
ttcgaattgaattagggcaaggtggtagtttgttaggggacgatcagttatataatgtta
ttgttactgctcatgcttttgttataattttttttatagtaatacctattttaattggag
ggtttggtaattggttagttcctttgatattaggagctccggatatggcatttcctcgta
taaataatttaagattttgattattaccaccttctttattattattatttatttctagta
tggatgagatgggggtaggagcagggtgaactgtttatcctccacttgcttctttggaag
ggcattctggtagatcggtagattttgctattttttctttacatttagctggggcttctt
caattataggagctattaattttatttctactatttttaatatgcgggggtatggtataa
ctatagaaagggttcctttatttgtttggtctgttttgattacagctgtattattattat
tgtctttacctgtattagcaggtgctattactatacttttaacagatcgaaattttaata
cgtcattttttgatcctgcggggggaggggatcctgttttatttcaacattta
>SMNKARA08832_Walckenaeria_alticeps_8y22E_48y55N_ad_f_A_Linyphiidae
gtttatattttatatttggagcttgagctgctatagtaggaacagcaataagagtattaa
ttcgaattgaattagggcaaggtggtagtttgttaggggacgatcagttatataatgtta
ttgttactgctcatgcttttgttataattttttttatagtaatacctattttaattggag
ggtttggtaattggttagttcctttgatattaggagctccggatatggcatttcctcgta
taaataatttaagattttgattattaccaccttctttattattattatttatttctagta
tggatgagatgggggtaggagcagggtgaactgtttatcctccacttgcttctttggaag
ggcattctggtagatcggtagattttgctattttttctttacatttagctggggcttctt
caattataggagctattaattttatttctactatttttaatatgcgggggtatggtataa
ctatagaaagggttcctttatttgtttggtctgttttgattacagctgtattattattat
tgtctttacctgtattagcaggtgctattactatacttttaacagatcgaaattttaata
cgtcattttttgatcctgcggggggaggggatcctgttttatttcaacattta
>SMNKARA08833_Walckenaeria_alticeps_8y22E_48y55N_ad_m_A_Linyphiidae
gtttatattttatatttggagcttgggctgctatagtaggaacagcaataagagtattaa
ttcgaattgaattagggcaaggtggtagtttgttaggggacgatcagttatataatgtta
ttgttactgctcatgcttttgttataattttttttatagtaatacctattttaattggag
ggtttggtaattggttagttcctttgatattaggagctccggatatggcatttcctcgta
taaataatttaagattttgattattaccaccttctttattattattatttatttctagta
tggatgagatgggggtaggagcagggtgaactgtttatcctccacttgcttctttggaag
ggcattctggtagatcggtagattttgctattttttctttacatttagctggggcttctt
caattataggagctattaattttatttctactatttttaatatgcgggggtatggtataa
ctatagaaagggttcctttatttgtttggtctgttttgattacagctgtattattattat
tgtctttacctgtattagcaggtgctattactatacttttaacagatcgaaattttaata
cgtcattttttgatcctgcggggggaggggatcctgttttatttcaacattta
>SMNKARA08834_Walckenaeria_atrotibialis_8y22E_48y55N_ad_f_A_Linyphiidae
gtttatattttatttttggagcttgagctgctatagtaggaacagcaataagagtattaa
ttcgaattgaattagggcaagttggtagcttattgggggatgatcaggtttataatgtta
ttgttactgctcatgcttttgtaataattttttttatagttataccgattttaattggtg
gatttggtaattgattggtgcctttaatgttaggggctcctgatatagcttttcctcgta
taaataatttaagattttggttattacccccttctttattattgttatttatttccagta
tagacgaaataggggtaggggcagggtggactgtgtatcctcctctctcttctttagaag
ggcattctggaagttcagtggattttgctattttttctcttcatttggctggagcttcat
caattatgggtgctattaattttatttcaactattttcaatatacgaggttatggtataa
ctatagaaaaagtccctttgtttgtttgatctgtattaattacagctgttttattattac
tatcttttcctgttttggcgggagcaattacgatacttttaacagatcgaaattttaata
catcattttttgatcctgctggggggggggatccagtattatttcaacattta
>SMNKARA08836_Walckenaeria_atrotibialis_8y22E_48y55N_ad_m_A_Linyphiidae
gtttatattttatttttggagcttgagctgctatagtaggaacagcaataagagtattaa
ttcgaattgaattagggcaagttggtagcttattgggggatgatcaggtttataatgtta
ttgttactgctcatgcttttgtaataattttttttatagttataccgattttaattggtg
gatttggtaattgattggtgcctttaatgttaggggctcctgatatagcttttcctcgta
taaataatttaagattttggttattacccccttctttattattgttatttatttccagta
tagacgaaataggggtaggggcagggtggactgtgtatcctcctctctcttctttagaag
ggcattctggaagttcagtggattttgctattttttctcttcatttggctggagcttcat
caattatgggtgctattaattttatttcaactattttcaatatacgaggttatggtataa
ctatagaaaaagtccctttgtttgtttgatctgtattaattacagctgttttattattac
tatctttacctgttttggcgggagcaattacgatacttttaacagatcgaaattttaata
catcattttttgatcctgctggggggggggatccagtattatttcaacattta
>SMNKARA08837_Walckenaeria_atrotibialis_8y22E_48y55N_ad_m_A_Linyphiidae
gtttatattttatttttggagcttgagctgctatagtaggaacagcaataagagtattaa
ttcgaattgaattagggcaagttggtagcttattgggggatgatcaggtttataatgtta
ttgttactgctcatgcttttgtaataattttttttatagttataccgattttaattggtg
gatttggtaattgattggtgcctttaatgttaggggctcctgatatagcttttcctcgta
taaataatttaagattttggttattacccccttctttattattgttatttatttccagta
tagacgaaataggggtaggggcagggtggactgtgtatcctcctctctcttctttagaag
ggcattctggaagttcagtggattttgctattttttctcttcatttggctggagcttcat
caattatgggtgctattaattttatttcaactattttcaatatacgaggttatggtataa
ctatagaaaaagtccctttgtttgtttgatctgtattaattacagctgttttattattac
tatctttacctgttttggcgggagcaattacgatacttttaacagatcgaaattttaata
catcattttttgatcctgctggggggggggatccagtattatttcaacattta
>SMNKARA08838_Inermocoelotes_inermis_8y22E_48y55N_ad_f_A_Agelenidae
ctttgtatttgatttttggagcttgatctgctatagttggtacagctatgagagttttga
ttcggattgaattaggtcaaccaggaagatttttaggtgatgatcatttatataatgtta
ttgttactgctcatgcttttgttatgattttttttatagtaatacctattttaattggag
gttttggaaactgattagttcctttaatattaggggctccagatatagcttttcctcgaa
taaataatttgagtttttgattattacctccttcattatttttattgtttatttcttcaa
tagttgaaataggtgtaggtgctggatgaacaatttatcctccattggcttctataatgg
gtcatgctggaagttctgttgattttgttattttttctttacatttagcgggggcttcct
ctattttaggagctattaattttatttctactatttttaatatacggtcatatggaataa
cttttgagaaagttcctttatttgtgtggtcagtattgattactgttgtgttattattgt
tgtctttacctgtattagcaggggctattacaatattattaactgatcgtaactttaata
cttcgttttttgatccagctggaggtggtgatcctattttatttcaacatttg
>SMNKARA08839_Inermocoelotes_inermis_8y22E_48y55N_ad_m_A_Agelenidae
ctttgtatttgatttttggagcttgatctgctatagttggtacagctatgagagttttga
ttcggattgaattaggtcaaccaggaagatttttaggtgatgatcatttatataatgtta
ttgttactgctcatgcttttgttatgattttttttatagtaatacctattttaattggag
gttttggaaactgattagttcctttaatattaggggctccagatatagcttttcctcgaa
taaataatttgagtttttgattattacctccttcattatttttattgtttatttcttcaa
tagttgaaataggtgtaggtgctggatgaacaatttatcctccattggcttctataatgg
gtcatgctggaagttctgttgattttgttattttttctttacatttagcgggggcttcct
ctattttaggagctattaattttatttctactatttttaatatacggtcatatggaataa
cttttgagaaagttcctttatttgtgtggtcagtattgattactgttgtgttattattgt
tgtctttacctgtattagcaggggctattacaatattattaactgatcgtaactttaata
cttcgttttttgatccagctggaggtggtgatcctattttatttcaacatttg
>SMNKARA08840_Inermocoelotes_inermis_8y22E_48y55N_ad_m_A_Agelenidae
ctttgtatttgatttttggagcttgatctgctatagttggtacagctatgagagttttga
ttcggattgaattaggtcaaccaggaagatttttaggtgatgatcatttatataatgtta
ttgttactgctcatgcttttgttatgattttttttatagtaatacctattttaattggag
gttttggaaactgattagttcctttaatattaggggctccagatatagcttttcctcgaa
taaataatttgagtttttgattattacctccttcattatttttattgtttatttcttcaa
tagttgaaataggtgtaggtgctggatgaacaatttatcctccattggcttctataatgg
gtcatgctggaagttctgttgattttgttattttttctttacatttagcgggggcttcct
ctattttaggagctattaattttatttctactatttttaatatacggtcatatggaataa
cttttgagaaagttcctttatttgtgtggtcagtattgattactgttgtgttattattgt
tgtctttacctgtattagcaggggctattacaatattattaactgatcgtaactttaata
cttcgttttttgatccagctggaggtggtgatcctattttatttcaacatttg
>SMNKARA08841_Inermocoelotes_inermis_8y22E_48y55N_ad_m_A_Agelenidae
ctttgtatttgatttttggagcttgatctgctatagttggtacagctatgagagttttga
ttcggattgaattaggtcaaccaggaagatttttaggtgatgatcatttatataatgtta
ttgttactgctcatgcttttgttatgattttttttatagtaatacctattttaattggag
gttttggaaactgattagttcctttaatattaggggctccagatatagcttttcctcgaa
taaataatttgagtttttgattattacctccttcattatttttattgtttatttcttcaa
tagttgaaataggtgtaggtgctggatgaacaatttatcctccattggcttctataatgg
gtcatgctggaagttctgttgattttgttattttttctttacatttagcgggggcttcct
ctattttaggagctattaattttatttctactatttttaatatacggtcatatggaataa
cttttgagaaagttcctttatttgtgtggtcagtattgattactgttgtgttattattgt
tgtctttacctgtattagcgggggctattacaatattattaactgatcgtaactttaata
cttcgttttttgatccagctggaggtggtgatcctattttatttcaacatttg
>SMNKARA08842_Inermocoelotes_inermis_8y22E_48y55N_ad_m_A_Agelenidae
ctttgtatttgatttttggagcttgatctgctatagttggtacagctatgagagttttga
ttcggattgaattaggtcaaccaggaagatttttaggtgatgatcatttatataatgtta
ttgttactgctcatgcttttgttatgattttttttatagtaatacctattttaattggag
gttttggaaactgattagttcctttaatattaggggctccagatatagcttttcctcgaa
taaataatttgagtttttgattattacctccttcattatttttattgtttatttcttcaa
tagttgaaataggtgtaggtgctggatgaacaatttatcctccattggcttctataatgg
gtcatgctggaagttctgttgattttgttattttttctttacatttagcgggggcttcct
ctattttaggagctattaattttatttctactatttttaatatacggtcatatggaataa
cttttgagaaagttcctttatttgtgtggtcagtattgattactgttgtgttattattgt
tgtctttacctgtattagcaggggctattacaatattattaactgatcgtaactttaata
cttcgttttttgatccagctggaggtggtgatcctattttatttcaacatttg
>SMNKARA08843_Inermocoelotes_inermis_8y22E_48y55N_ad_m_A_Agelenidae
ctttgtatttgatttttggagcttgatctgctatagttggtacagctatgagagttttga
ttcggattgaattaggtcaaccaggaagatttttaggtgatgatcatttatataatgtta
ttgttactgctcatgcttttgttatgattttttttatagtaatacctattttaattggag
gttttggaaactgattagttcctttaatattaggggctccagatatagcttttcctcgaa
taaataatttgagtttttgattattacctccttcattatttttattgtttatttcttcaa
tagttgaaataggtgtaggtgctggatgaacaatttatcctccattggcttctataatgg
gtcatgctggaagttctgttgattttgttattttttctttacatttagcgggggcttcct
ctattttaggagctattaattttatttctactatttttaatatacggtcatatggaataa
cttttgagaaagttcctttatttgtgtggtcagtattgattactgttgtgttattattgt
tgtctttacctgtattagcaggggctattacaatattattaactgatcgtaactttaata
cttcgttttttgatccagctggaggtggtgatcctattttatttcaacatttg
>SMNKARA08844_Eratigena_agrestis_8y66E_49y33N_ad_f_A_Agelenidae
ctttgtatttggtatttggggcttggtctgctatagttggaacagctataagagttctta
ttcggattgagttaggtcaacctggtagatttttgggtgatgatcatttatataatgtta
ttgttactgctcatgcttttattataattttttttatagttataccaatcatgattggtg
gatttggtaattgattagttcctttaatattgggagctccagatatagctttccctcgta
taaataatttaagtttttgattattaccgccttctttgattatattatttatttcttcta
tagttgagataggtgttggggctgggtgaactatttatcctcctttagcttcttctattg
gtcattttggtagatctgttgattttgctattttttctttacatttggctggggcttctt
ctattataggtgctattaattttatctctaccatttttaatatacgatctgttagaataa
ccatagagaaggttcctttatttgtatgatctgttttaattactgctgttttattattat
tgtctttacctgtattagctggtgctattactatattattaactgatcgaaatttttata
cttctttttttgatcctgctgggggaggagatcctattttatttcagcattta
>SMNKARA08846_Cercidia_prominens_8y66E_49y33N_ad_f_A_Araneidae
ctttatatttagtttttggtgcatgagctgctatagtgggaacggctataagagttttaa
ttcgagttgaattaggtcagtctggaagatttataggagatgatcagctttataatgtaa
ttgtaactgctcatgcttttgtaataattttttttatagtaataccaattttgattggtg
gatttggaaattgattagttcctttaatattaggagcacctgatatagcatttcctcgaa
taaataatttaagattttggttacttcctccttcattatttcttttaattgtatcttcaa
tggttgaaataggtgtgggttctgggtgaacagtatatccaccgctagctagattagaag
gacatgctggtagttcagttgattttgctattttttctttgcatttagctggggcttctt
ctattataggggcaattaattttatttctactattattaatatacgattttacggaataa
ctatagaaaaggtatctttatttgtatgatcagttttaattacagctgttctattacttc
tttctttaccagtattagcaggagcaatcactatattattgactgatcgtaattttaata
cttctttttttgatccttctggaggaggagatcctattttatttcaacattta
>SMNKARA08847_Cercidia_prominens_8y66E_49y33N_ad_f_A_Araneidae
ctttatatttagtttttggtgcatgagctgctatagtgggaacggctataagagttttaa
ttcgagttgaattaggtcagtctggaagatttataggagatgatcagctttataatgtaa
ttgtaactgctcatgcttttgtaataattttttttatagtaataccaattttgattggtg
gatttggaaattgattagttcctttaatattaggagcacctgatatagcatttcctcgaa
taaataatttaagattttggttacttcctccttcattatttcttttaattgtatcttcaa
tggttgaaataggtgtgggttctgggtgaacagtatatccaccgctagctagattagaag
gacatgctggtagttcagttgattttgctattttttctttgcatttagctggggcttctt
ctattataggggcaattaattttatttctactattattaatatacgattttacggaataa
ctatagaaaaggtatctttatttgtatgatcagttttaattacagctgttctattacttc
tttctttaccagtattagcaggagcaatcactatattattgactgatcgtaattttaata
cttctttttttgatccttctggaggaggagatcctattttatttcaacattta
>SMNKARA08848_Gibbaranea_bituberculata_8y66E_49y33N_ad_m_A_Araneidae
ctttgtatttaatttttggagcttgagctgctatggtagggacagcgataagagtattaa
ttcggattgaattaggtcaatcgggtagatttattggtgatgatcaaatttataatgtta
ttgtaacagctcatgcttttgtaataattttttttatagttatgccaattttgattggag
gttttggaaattgattggttccgttaatattaggtgctcctgatatagcttttcctcgaa
taaataatttaagtttttgattattacctccatctttatttcttttgattgtttcatctt
tagtagaaataggagttggtgctggatggactatttatccccctttagctagattggaag
gtcatgctggaagatctgttgattttgctattttttctctacatttagctggggcatcat
ctattataggggctattaatttcatttctactattattaatatgcggtcttatggaatat
ctatagaaaaggtacctttgtttgtatgatctgtattaattacagctgtattattattac
tttctttacctgttttagctggtgctattactatattattaacagatcgaaattttaata
catcttttttcgatccttcaggaggaggagatcctattttgtttcaacatttg
>SMNKARA08849_Gibbaranea_bituberculata_8y66E_49y33N_ad_f_A_Araneidae
ctttgtatttaatttttggagcttgagctgctatggtagggacagcgataagagtattaa
ttcggattgaattaggtcaatcgggtagatttattggtgatgatcaaatttataatgtta
ttgtaacagctcatgcttttgtaataattttttttatagttatgccaattttgattggag
gttttggaaattgattggttccgttaatattaggtgctcctgatatagcttttcctcgaa
taaataatttaagtttttgattattacctccatctttatttcttttgattgtttcatctt
tagtagaaataggagttggtgctggatggactatttatccccctttagctagattggaag
gtcatgctggaagatctgttgattttgctattttttctctacatttagctggggcatcat
ctattatgggggctattaatttcatttctactattattaatatgcggtcttatggaatat
ctatagaaaaggtacctttatttgtatgatctgtattaattacagctgtattattattac
tttctttacctgttttagctggtgctattactatattattaacagatcgaaattttaata
catcttttttcgatccttcagggggaggggatcctattttgtttcaacatttg
>SMNKARA08850_Mangora_acalypha_8y66E_49y33N_jv_A_Araneidae
ctttatatctggtttttggtgcttgggctgctatagtaggaacagctatgagagtattga
ttcgaattgagttggggcagccagggaggtttattggggatgaccagttgtataatgtaa
ttgttacagctcatgcttttgtgataattttttttatggtgatgccaattttaattgggg
ggtttgggaattggttagtccccttgatgttaggggctccagatatggcatttccccgaa
taaataatttgagtttttgattgcttcctccttctttatttttgttgatcatttcatcta
tagtcgaaataggggttggggcaggatgaactgtttatccccctcttgcaagattagaag
ggcatgctgggagttccgttgattttgcaattttttctcttcatttggcaggggcttctt
ctattataggggctattaactttattagaacaattattaatatgcgattttacggaataa
ctatggagaaagtgccattgtttgtttggtctgttctaattacagcggtcttattgctgt
tgtctttaccagttttagcgggggctattacgatgcttttaacagatcggaattttaata
cttctttctttgacccttcaggagggggggatcctattttgtttcaacatctg
>SMNKARA08851_Mangora_acalypha_8y66E_49y33N_jv_A_Araneidae
ctttatatttggtttttggcgcttgggctgctatagtaggaacagctatgagagtattga
ttcgaattgagttggggcagccagggaggtttattggggatgaccagttgtataatgtaa
ttgttacagctcatgcttttgtgataattttttttatggtgatgccaattttaattgggg
ggtttgggaattggttagttcccttgatgttaggggctccagatatagcatttccccgaa
taaataatttgagtttttgattgcttcctccttctttatttttgttaatcatttcatcta
tagtcgaaataggggttggggcaggatgaactgtttatcctcctcttgcaagattagaag
ggcatgctgggagttccgttgattttgcaattttttctcttcatttggcaggggcttctt
ctattatgggggctattaattttattagaacaattattaatatacgattttatggaataa
ctatggagaaagtgccattgtttgtttggtccgtgctaattacagcggtcttattgctgt
tgtctttaccagttttagcgggggctattacgatgcttttaacagatcgaaattttaata
cttctttctttgacccttcaggagggggggatcctattttgttccaacatttg
>SMNKARA08852_Mangora_acalypha_8y66E_49y33N_jv_A_Araneidae
ctttatatctggtttttggtgcttgggctgctatagtaggaacagctatgagagtattga
ttcgaattgagttggggcagccagggaggtttattggggatgaccagttgtataatgtaa
ttgttacagctcatgcttttgtgataattttttttatggtgatgccaattttaattgggg
ggtttgggaattggttagtccccttgatgttaggggctccagatatggcatttccccgaa
taaataatttgagtttttgattgcttcctccttctttatttttgttgatcatttcatcta
tagtcgaaataggggttggggcaggatgaactgtttatccccctcttgcaagattagaag
ggcatgctgggagttccgttgattttgcaattttttctcttcatttggcaggggcttctt
ctattataggggctattaactttattagaacaattattaatatgcgattttacggaataa
ctatggagaaagtgccattgtttgtttggtctgttctaattacagcggtcttattgctgt
tgtctttaccagttttagcgggggctattacgatgcttttaacagatcggaattttaata
cttctttctttgacccttcaggagggggggatcctattttgtttcaacatctg
>SMNKARA08853_Mangora_acalypha_8y66E_49y33N_jv_A_Araneidae
ctttatatctggtttttggtgcttgggctgctatagtaggaacagctatgagagtattga
ttcgaattgagttggggcagccagggaggtttattggggatgaccagttgtataatgtaa
ttgttacagctcatgcttttgtgataattttttttatggtgatgccaattttaattgggg
ggtttgggaattggttagtccccttgatgttaggggctccagatatggcatttccccgaa
taaataatttgagtttttggttgcttcctccttctttatttttgttgatcatttcatcta
tagtcgaaataggggttggggcaggatgaactgtttatccccctcttgcaagattagaag
ggcatgctgggagttccgttgattttgcaattttttctcttcatttggcaggggcttctt
ctattataggggctattaactttattagaacaattattaatatgcgattttacggaataa
ctatggagaaagtgccattgtttgtttggtctgttctaattacagcggtcttattgctgt
tgtctttaccagttttagcgggggctattacgatgcttttaacagatcggaattttaata
cttctttctttgacccttcaggagggggggatcctattttgtttcaacatctg
>SMNKARA08854_Drassodes_cupreus_8y22E_48y55N_ad_m_A_Gnaphosidae
ctttatattttttatttggattatgatcttcaatagtaggaacagctataagagtggtga
ttcgtatagaattaggacaatctggtagattattaggagatgatcatttatataatgtaa
ttgttacagcacatgcttttgttataattttttttatagtaatacctattttgattggag
gctttggaaattgattagttcctttgatattaggtgctcctgatatagcttttccacgta
taaataatttgagtttttgattattaccaccttcgttagttttattatttatttcttcta
tagctgaaataggtgtaggagctggttgaacagtttatcctccattggcttctaatattg
gacatgctggaagtgctatagattttgctattttttcattacatttggctggagcttctt
ctattataggagctgttaattttatttctactattgtgaatatacgaatattaggaatga
gaatagagaaggtttcattatttgtatgatctgtattaattactgctgtattgttattat
tatctttaccagttttagctggagcaattactatattattaactgatcgtaattttaata
cttcatttttcgatccagctggaggtggtgatccaattttatttcaacattta
>SMNKARA08855_Haplodrassus_signifer_8y22E_48y55N_ad_m_A_Gnaphosidae
ctttatatttactttttggatcttgagctgctatagtaggaactgcaataagagtattaa
ttcgaatggaattaggacaatcagggagatttattggggatgatcatttatataatgtaa
ttgttactgctcatgcatttgttataattttttttatagtaatacctattatgattggtg
gttttggaaattggttagttcctttaatgttaggagccccagatatagcttttcctcgaa
taaataatttaagtttttgattattacctccatctttagttttattatttgtttcttcta
tagttgaaatgggagttggagctggatgaactgtatatcctcccttagcttcttctatag
gacatagtggtagagctatagattttgctattttttctttgcatttggctggtgcttctt
ctattataggggctattaattttatttctactgtaattaatatgcgttctttaggtataa
gtatagagagggtacctttatttgtttgatctgtttttattacggcggtgttattattat
tatccttacctgtattggcaggagctattactatattgttaacggatcgtaattttaata
cttctttttttgacccagctggaggaggagatcctattttatttcaacattta
>SMNKARA08856_Haplodrassus_signifer_8y22E_48y55N_ad_f_A_Gnaphosidae
ctttatatttactttttggatcttgagctgctatagtaggaactgcaataagagtattaa
ttcgaatggaattaggacaatcagggagatttattggggatgatcatttatataatgtaa
ttgttactgctcatgcatttgttataattttttttatagtaatacctattatgattggtg
gttttggaaattggttagttcctttaatgttaggagccccagatatagcttttcctcgaa
taaataatttaagtttttgattattacctccatctttagttttattatttgtttcttcta
tagttgaaatgggagttggagctggatgaactgtatatcctcccttagcttcttctatag
gacatagtggtagagctatagattttgctattttttctttgcatttggctggtgcttctt
ctattataggggctattaattttatttctactgtaattaatatgcgttctttaggtataa
gtatagagagggtacctttatttgtttgatctgtttttattacggcggtgttattattat
tatccttacctgtattggcaggagctattactatattgttaacggatcgtaattttaata
cttctttttttgacccagctggaggaggagatcctattttatttcaacattta
>SMNKARA08857_Zelotes_petrensis_8y66E_49y33N_ad_f_A_Gnaphosidae
ctttatatttattatttggttcatgagctgctatggtgggaactgctataagagtattaa
ttcgaatggaattaggtcaacctggtagatttataggtgatgatcatttatataatgtta
ttgtaacggctcatgcttttgttataattttttttatagttatgcctattttaattggtg
gatttggaaattgattggttcctttgatgttgggtgcaccagatatggcatttccacgta
taaataatttaagtttttgattattaccaccttcattaatattattatttatttcttcta
tagtggaaataggggttggagctggttgaactgtatatccacctttagcttctaatatgg
gtcatgcaggaagagctatggattttgctattttttctttacatttggcaggtgcttctt
ctattataggggcaattaattttatttctactattattaatatgcgttctattggaatga
ctatagaaaaggttcctttgtttgtatgatcagtatttattactgcagtattattattat
tatccttacccgtattagcaggtgctattactatattattaactgatcgttattttaata
cttcattttttgaccctgctggagggggggatcctattttatttcaacatttg
>SMNKARA08858_Zelotes_latreillei_8y22E_48y55N_ad_m_A_Gnaphosidae
ctttatatttattatttggttcatgggctgctatggtaggaactgctataagagtattaa
ttcgtatagaattaggtcaacctggaagatttataggtgatgatcatttatataatgtta
ttgtgactgctcatgcatttgttatgattttttttatggttatacctattttaattggtg
ggtttggaaattgattagttcctttgatactgggggctccagatatagcatttcctcgta
taaataatttgagtttttgactactacctccttcattaatgttattatttatttcgtcta
tggtagaaataggagtaggtgctggttgaactgtatatccacctttggcttcgaatatag
gtcattcgggaagagccatggattttgctattttttctttacatttagcgggtgcttcgt
ctattataggagcaattaattttatttctactgtaattaatatgcgttctattggaataa
gtatggaaaaggttcctttgtttgtatgatcagtatttattactgcggtgttattgttat
tatctttacctgtattagcaggtgctattactatattattaactgatcgtaattttaata
cttcgttttttgaccctgctgggggaggggatcctattttatttcaacattta
>SMNKARA08859_Zelotes_clivicola_8y22E_48y55N_ad_m_A_Gnaphosidae
ctttatatttattatttggttcatgggctgctatggtaggaactgctataagagtattaa
ttcgtatggaattaggtcaacctggaagatttatgggtgatgatcatttatataatgtta
ttgtgactgctcatgcatttgttatgattttttttatggttatgcctattttaattggtg
ggtttggaaattgattagttcctttgatactgggggctccagatatagcatttcctcgta
taaataatttgagtttttggctattgcctccttcattaatattattatttatttcgtcta
tggtagaaatgggagtaggtgctggttgaactgtatatccacctttggcttcaaatatag
gtcattcgggaagagccatggattttgctattttttctttgcatttagcgggtgcttcat
cgattatgggagcaattaattttatttctactgtaattaatatgcgttctattggaataa
gtatggaaaaggttcctttatttgtatgatcagtatttattactgcggtattattattat
tatctttacctgtattagcgggtgctattactatattattaactgatcgtaattttaata
cttcgttttttgatcctgctggaggaggggatcctattttatttcaacattta
>SMNKARA08860_Dictyna_uncinata_8y66E_49y33N_ad_m_A_Dictynidae
ctctttatttattgtttggagcttgagctgctatagtaggtactgcaataagagtattaa
ttcgaattgaattagggcaacctggaagatttttaggtaatgatcaaatttataatgtta
tagttactgctcatgcttttgttatgattttttttatagttatacctattttaattggag
ggtttggaaattgattagttcctttaatgttaggagctcctgatatggcttttccccgta
tgaataatttaagattttgattattacctccttccttattgttgttgtttatttcttcta
tagttgaaataggagttggggctggatgaacaatttatcctcctttggcttctgtggttg
ggcattcagggagatccgtagattttgcaattttttctttacatttggctggtgcttctt
caattataggagctattaattttatttcaactattattaatatacgaatagaaggaatat
ctatggaaaaaattccgttatttgtttgatctgtattaattactgctgttttattgttat
tatctcttccggttttagcaggagctattactatattgttgactgatcgaaattttaata
catctttttttgatcccgcaggaggaggagatcctattttatttcaacattta
>SMNKARA08861_Dictyna_uncinata_8y66E_49y33N_jv_A_Dictynidae
ctctttatttattgtttggagcttgagctgctatagtgggtactgcaataagagtattaa
ttcgaattgaattagggcaacctggaagatttttaggtaatgatcaaatttataatgtta
tagttactgctcatgcttttgttatgattttttttatagttatacctattttaattggag
ggtttggaaattgattagttcctttaatgttaggagcccctgatatggcttttccccgta
tgaataatttgagattttgattattacctccttccttattgttgttgtttatttcttcta
tagttgaaataggagttggggctggatgaacaatttatcctcctttggcttctgtggttg
ggcattcaggaagatccgtagattttgcaattttttctttacatttggctggtgcttctt
caattataggagctattaattttatttcaactattattaatatacgaatagaaggaatat
ctatggaaaaaattccgttatttgtctgatctgtattaattactgctgttttattgttat
tatctcttccggttttagcaggagctattactatattgttgactgatcgaaattttaata
catctttttttgatcccgcaggaggaggagatcctattttatttcaacattta
>SMNKARA08864_Hahnia_nava_10y43E_47y4N_ad_f_A_Hahniidae
ctttatatttaatttttggagcgtgatcagctatagttgggacagcaatgagtgttctta
ttcgaattgaattagggcaacctggtagatttttaggggatgatcatttatataatgtga
ttgttacagctcatgcttttgttataattttttttatagttataccgattatgattggag
ggtttggtaattgattggtgcctttgatgttaggggctcctgatatggctttccctcgga
tgaataacttaagattttgattgttacccccatctttaatattgttatttatatcatcta
tggttgagataggagttggagcgggatgaacggtttatccccctttagcttctactatag
gtcatgctggaagttctgtagattttgctattttttctttacatttggctggggcttctt
caattataggggctattaattttattactactattattaatatacgatcacatggaataa
gaatagagaaggttcctttatttgtttggtctgtatttattacagctgttttattattac
tttctcttccagtgttagctggggctattactatattgttaacagatcgaaattttaata
cttctttttttgatcctgcagggggaggagatcctattttatttcaacattta
>SMNKARA08865_Hahnia_nava_10y43E_47y4N_ad_f_A_Hahniidae
ctttatatttaatttttggagcgtgatcagctatagttgggacagcaatgagtgttctta
ttcgaattgaattagggcaacctggtagatttttaggggatgatcatttatataatgtga
ttgttacagctcatgcttttgttataattttttttatagttataccgattatgattggag
ggtttggtaattgattggtgcctttgatgttaggggctcctgatatggctttccctcgga
tgaataacttaagattttgattgttacccccatctttaatattgttatttatatcatcta
tggttgagataggagttggagcgggatgaacggtttatccccctttagcttctactatag
gtcatgctggaagttctgtagattttgctattttttctttacatttggctggggcttctt
caattataggggctattaattttattactactattattaatatacgatcacatggaataa
gaatagagaaggttcctttatttgtttggtctgtatttattacagctgttttattattac
tttctcttccagtgttagctggggctattactatattgttaacagatcgaaattttaata
cttctttttttgatcctgcagggggaggagatcctattttatttcaacattta
>SMNKARA08867_Evarcha_falcata_8y66E_49y33N_ad_f_A_Salticidae
ctttatatttaatttttggagcttgggctgctatagtaggtactgctataagagtattga
ttcgaatagaattagggcagactggaagatttttaggaaatgaacatttatataatgtta
ttgttacagctcatgcatttgttataattttttttatagtaatacctattataattggtg
gttttggtaattgattggtaccgttgatactaggggctccggatatagcttttcctcgta
tgaataatctaagattttgattattgcctccttctttgatgttattatttatttcctcta
tagctgaaataggggtgggggctggatgaacagtatatcctcctttagcctctattgtag
gtcataatggaagatctgtagattttgctattttttctttacatttagctggagcatctt
ctattatgggtgctattaattttatttcaactattattaatatacggtcggtaggaatat
caatggataaagtttctttatttgtatgatcagttttaattactgctgtattattactat
tgtcattaccagttctagctggagctattactatattattaactgatcgaaattttaata
cttctttttttgatcctgcgggaggaggagatccaattttgtttcaacattta
>SMNKARA08868_Evarcha_arcuata_8y66E_49y33N_ad_m_A_Salticidae
ctttatatttaatttttggagcttgagctgctatagtaggaactgctataagagtattaa
ttcgaatagaattgggacaaactggtagttttttgggaaatgaacatttatataatgtta
ttgttactgctcatgcatttattataatcttttttatagttatgcctattataattggag
gttttggtaattgattagttcctttaatgttaggagctcctgatatagcttttcctcgga
taaataatttaagattttgacttttacctccttctttaatattattatttatttcatcta
tagctgaaataggggtaggagctggatgaacggtatatccacctttagcttctattgtgg
gtcataatggtagatctgtggatttcgctattttttctttgcatttggctggggcatctt
ctattataggtgctattaattttatttcaactgttattaatatacgatcagtaggaatat
caatagataaaatttctttatttgtatgatcggttttaattactgctgtattattattat
tatcattaccagtattagcaggtgctattactatattattaactgatcgaaattttaata
cttctttctttgatcctgcaggtggaggtgatccaattttgtttcaacattta
>SMNKARA08869_Heliophanus_cupreus_8y66E_49y33N_ad_m_A_Salticidae
ctttatatttaatttttggagcatgatctgctatagtaggaacggcaatgagagttttga
ttcggatggaattaggtcagactggtagatttttaggtaatgatcatatatataatgtaa
ttgtaacggcacatgcttttgttataattttttttatagtaataccgattttgattggag
gatttggtaattgattagttcctttaatgttaggagctcctgatatagcttttcctcgaa
tgaataatttaagattttgattattacctccttcgttaatattattgtttatttcttcta
tggctgaaataggggttggagcggggtgaactgtttatcctcctttagcttctattattg
gtcacaatgggagttctgttgattttgcgattttttctttacatttggctggagcttctt
ctattataggagctattaattttatctctacggttattaatatacgttctgttggtataa
gattagaaaaagttcctttatttgtatgatctgtagtaattacggctgtattattattat
tatcattgcctgtattagctggtgctattactatattattaacagatcgtaattttaata
cttcattttttgatcctgctggtgggggtgatcctattttatttcaacattta
>SMNKARA08870_Heliophanus_cupreus_8y66E_49y33N_ad_m_A_Salticidae
ctttatatttaatttttggagcatgatctgctatagtaggaacggcaatgagagttttga
ttcggatggaattaggtcagactggtagatttttaggtaatgatcatatgtataatgtaa
ttgtaacggcacatgcttttgttataattttttttatagtaataccgattttgattggtg
gatttggtaattgattagttcctttaatgttaggagctcctgatatggcttttcctcgaa
tgaataatttaagattttgattattacctccttcgttaatattattgtttatttcttcta
tggctgaaataggggttggagcggggtgaactgtttatcctcctttagcttctattattg
gtcataatgggagttctgttgattttgcgattttttctttacatttggctggagcttctt
ctattataggagctattaattttatctctacggttattaatatacgttctgttggtataa
gattagaaaaagttcctttatttgtatgatctgtagtaattacggctgtattattattat
tatcattgcctgtattagctggtgctattactatattattaacagatcgtaattttaata
cttcattttttgatcctgctggtgggggtgatcctattttatttcaacattta
>SMNKARA08871_Heliophanus_cupreus_8y66E_49y33N_ad_m_A_Salticidae
ctttatatttaatttttggagcatgatctgctatagtaggaacggcaatgagagttttga
ttcggatggaattaggtcagactggtagatttttaggtaatgatcatatatataatgtaa
ttgtaacggcacatgcttttgttataattttttttatagtaataccgattttgattggag
gatttggtaattgattagttcctttaatgttaggagctcctgatatagcttttcctcgaa
tgaataatttaagattttgattattacctccttcgttaatattattgtttatttcttcta
tggctgaaataggggttggagcggggtgaactgtttatcctcctttagcttctattattg
gtcacaatgggagttctgttgattttgcgattttttctttacatttggctggagcttctt
ctattataggagctattaattttatctctacggttattaatatacgttctgttggtataa
gattagaaaaagttcctttatttgtatgatctgtagtaattacggctgtattattattat
tatcattgcctgtattagctggtgctattactatattattaacagattgtaattttaata
cttcattttttgatcctgctggtgggggtgatcctattttatttcaacattta
>SMNKARA08872_Neon_reticulatus_8y22E_48y55N_ad_f_A_Salticidae
nnntatatttaatatttggaggttgatctggtatagtaggtacagcgatgagagtattga
ttcgaatagaattaggacaaactggtcattttttgggtaaggatcatttatataatgtaa
ttgttacttctcatgcttttattatgattttttttatagtaatacctattataattgggg
gattcggaaattggttagttcctttaatgttaggggctcctgatatagcttttcctcgaa
taaataatttaagattttgattgttacccccttctttagtattattatttatatcatcta
tagtggaaataggagtgggtgcaggatgaactgtttatccgcctttggcttctgttattg
gtcatagaggaggatcggttgattttgctattttttctttacatttggcgggagcttctt
ctattatgggggctattaattttatttctactattattaatatacgttctgaagggatat
ttttagataaaatatctttgtttgtgtggtcggtgattattactgctgtattattattat
tatctttacctgtattagcaggtgctattactatattgcttacagatcgtaattttaata
cttctttttttgatnnnnnnnnnnnnnnnnnnnnnnnnnnnnnnnnnnnnnnn
>SMNKARA08873_Neon_reticulatus_8y22E_48y55N_ad_m_A_Salticidae
ctttatatttaatttttggagcttgatctgctatagtaggtacagcgatgagagtattga
ttcgaatagaattaggacaaactggtcattttttgggtaatgaccatttatataatgtaa
ttgttacttctcatgcttttattatgattttttttatagtaatacctattataattggag
gatttggaaattggttagttcctttaatgttaggggctcctgatatagcttttcctcgaa
taaataatttaagattttgattgttacccccttctttagtattattatttgtatcatcta
tagtggaaataggagttggtgcaggatgaactgtttatccgcctttggcttctgttattg
gccatagaggagcatcggttgattttgctattttttctttacatttggctggagcttctt
ctattatgggggctattaattttatttctactattattaatatacgttctgaagggatat
ttttagataaaatatctttgtttgtgtggtcggtgattattactgctgtattattattat
tatctttacctgtattggcaggtgctattactatattgcttacggaccgtaattttaata
cttctttttttgatcctgctggaggaggagatccaattttgtttcaacattta
>SMNKARA08874_Aelurillus_vinsignitus_8y66E_49y33N_ad_m_A_Salticidae
ctttatatttaatttttggagcatgatctgccatggtaggaacagcaataagagtattga
ttcgaatagaattaggacagacaggtagttttttaggtaatgatcatatatataatgtta
ttgtaactgctcatgcttttgtaatgattttttttatagtaataccaattataattggtg
gttttggaaattgattagttcctttgatgttgggagctcctgatatagctttccctcgaa
taaataacttaagattttgattattgcctccctctttatttttattatttatatcatcta
tagtagagataggggttggagctgggtgaactgtttatcctcctttggcttctattgttg
gtcataatggtagatctgtagattttgcaattttttctttacatttagctggagcttctt
caattataggagctattaattttatttctactgtagttaatatgcgatctgtagggataa
gtctagataaggttcctttatttgtatgatctgttgttattacggctgttctattattat
tatctttgcctgtgttagccggtgctattactatactattaacagatcgtaattttaata
catctttttttgaccctgctggagggggagaccctattttgtttcaacacttg
>SMNKARA08875_Aelurillus_vinsignitus_8y66E_49y33N_ad_m_A_Salticidae
ctttatatttaatttttggagcatgatctgccatggtaggaacagcaataagagtattga
ttcgaatagaattaggacagacaggtagttttttaggtaatgatcatatatataatgtta
ttgtaactgctcatgcctttgtaatgattttttttatagtaataccaattataattggtg
gttttggaaattgattagttcctttgatgttgggagctcctgatatagctttccctcgaa
taaataacttaagattttgattattgcctccctctttatttttattatttatatcatcta
tagtagagataggggttggagctgggtgaactgtttatcctcctttggcttctattgttg
gtcataatggtagatctgtagattttgcaattttttctttacatttagctggagcttctt
caattataggagctattaattttatttctactgtagttaatatgcgatctgtagggataa
gtctagataagattcctttatttgtatgatctgttgttattacggctgttctattattat
tatctttgcctgtgttagccggtgctattactatactattaacagttcgtaattttaata
catctttttttgaccctgctggagggggagaccctattttgtttcaacacttg
>SMNKARA08876_Aelurillus_vinsignitus_8y66E_49y33N_ad_m_A_Salticidae
ctttatatttaatttttggagcatgatctgccatggtaggaacagcaataagagtattga
ttcgaatagaattaggacagacaggtagttttttaggtaatgatcatatatataatgtta
ttgtaactgctcatgcctttgtaatgattttttttatagtaataccaattataattggtg
gttttggaaattgattagttcctttgatgttgggagctcctgatatagctttccctcgaa
taaataacttaagattttgattattgcctccctctttatttttattatttatatcatcta
tagtagagataggggttggagctgggtgaactgtttatcctcctttggcttctattgttg
gtcataatggtagatctgtagattttgcaattttttctttacatttagctggagcttctt
caattataggagctattaattttatttctactgtagttaatatgcgatctgtagggataa
gtctagataagattcctttatttgtatgatctgttgttattactgctgttctattattat
tatctttgcctgtgttagccggtgctattactatactattaacagatcgtaattttaata
catctttttttgaccctgctggagggggagaccctattttgtttcaacacttg
>SMNKARA08877_Aelurillus_vinsignitus_8y66E_49y33N_ad_f_A_Salticidae
ctttatatttaatttttggagcatgatctgccatggtaggaacagcaataagagtattga
ttcgaatagaattaggacagacaggtagttttttaggtaatgatcatatatataatgtta
ttgtaactgctcatgcttttgtaatgattttttttatagtaataccaattataattggtg
gttttggaaattgattagttcctttgatgttgggagctcctgatatagctttccctcgaa
taaataacttaagattttgattattgcctccctctttatttttattatttatatcatcta
tagtagagataggggttggagctgggtgaactgtttatcctcctttggcttctattgttg
gtcataatggtagatctgtagattttgcaattttttctttacatttagctggagcttctt
caattataggagctattaattttatttctactgtagttaatatgcgatctgtagggataa
gtctagataaggttcctttatttgtatgatctgttgttattacggctgttctattattat
tatctttgcctgtgttagccggtgctattactatactattaacagatcgtaattttaata
catctttttttgaccctgctggagggggagaccctattttgtttcaacacttg
>SMNKARA08878_Aelurillus_vinsignitus_8y66E_49y33N_jv_A_Salticidae
ctttatatttaatttttggagcatgatctgccatggtaggaacagcaataagagtattga
ttcgaatagaattaggacagacaggtagttttttaggtaatgatcatatatataatgtta
ttgtaactgctcatgcctttgtaatgattttttttatagtaataccaattataattggtg
gttttggaaattgattagttcctttgatgttgggagctcctgatatagctttccctcgaa
taaataacttaagattttgattattgcctccctctttatttttattatttatatcatcta
tagtagagataggggttggagctgggtgaactgtttatcctcctttggcttctattgttg
gtcataatggtagatctgtagattttgcaattttttctttacatttagctggagcttctt
caattataggagctattaattttatttctactgtagttaatatgcgatctgtagggataa
gtctagataagattcctttatttgtatgatctgttgttattacggctgttctattattat
tatctttgcctgtgttagccggtgctattactatactattaacagatcgtaattttaata
catctttttttgaccctgctggagggggagaccctattttgtttcaacacttg
>SMNKARA08879_Pellenes_nigrociliatus_8y66E_49y33N_ad_m_A_Salticidae
cattatatttaatttttggtgcttgagctgctatagtaggaactgctataagagtattaa
ttcgaatagaattaggtcaaactggaagatttttagggaatgatcatttgtataatgtta
ttgttactgctcatgcttttgtaatgattttttttatagtgatacctattttaattgggg
gttttggaaattgattagttcctttaatattaggtgctcctgatatggcctttccccgga
taaataatttaagtttttgattgttgcctccttctttaatgctattatttatttcttcaa
tagtagagatgggagtaggtgctgggtgaacggtttatccccctttagcttcagtagtag
ggcatggtggaagatcagtggattttgctattttttctttacatttggctggtgcttctt
caattataggggctattaattttatttctacggttattaatatgcgttcttctagaatga
ctatggatagggttcctttatttgtgtgatcagttgtaattactgctgtcttattattgt
tgtctttacctgttttagcaggggctattactatattgttgactgatcgaaattttaata
catcgttttttgatccagcgggaggtggtgatccaattttatttcaacattta
>SMNKARA08880_Heliophanus_flavipes_8y66E_49y33N_ad_m_A_Salticidae
ctttatatttaatttttggagcgtgatctgctatagtaggaacagcgataagagtattaa
ttcgaatggaattaggtcaaactggtagatttttagggaatgatcatatatataacgtga
ttgtaacagctcatgcttttgttatgattttttttatggtaatgccaattttaattggtg
ggtttggtaattgattggttcctttaatgttaggagctcctgatatggcatttcctcgaa
tgaataatttaagcttttgattattacctccttcattaatattattatttatctcttcta
tagctgaaataggagttggggctggatgaactgtttatccacctttagcttctattattg
gacataatggaagttctgttgattttgcaattttttctttacatttagctggagcttctt
ctattatgggggctattaatttcatttctacagttattaatatacgttctattgggatag
gattagataaggtccctttatttgtgtgatctgtggtaattacagctgtattattattat
tgtcattacctgttttagctggtgctattactatactattaacagatcgaaattttaata
cttcattttttgaccctgctggtggtggtgatcctattttatttcagcattta
>SMNKARA08881_Marpissa_muscosa_8y66E_49y33N_ad_f_A_Salticidae
ctctatatttagtttttggagcgtgatctgctatagttggtacagcaataagagttttaa
ttcggatggaattaggacaaacaggatcatttttgggtaatgatcatatatataatgtga
ttgtaactgctcatgcttttgttataattttttttatagtaatacctattttgattggag
gatttggaaattgattagtacctttaatattaggggctccggatatagcctttcctcgta
taaataatcttagattttgacttttgcctccttctttatttttattgtttatttcatcta
tggttgaaataggagtgggggcaggttggactgtatatccgcctttggcttctattgttg
gacataatggaagatccgtggattttgctattttttctttacatttagcgggggcttcct
ctattataggagctattaattttatttccacaattattaatatacgttcgatagggatat
cttttgataaagtacctttatttgtatgatctgttttaattacggcaattttattattgt
tatctcttcctgtcttagcaggggctattacgatattattaactgatcgtaattttaata
cttctttttttgatcctgctggagggggtgatcctattttatttcaacattta
>SMNKARA08882_Euophrys_frontalis_8y66E_49y33N_ad_m_A_Salticidae
ctttatatctaatttttggggtttgatcggcaatggtaggtacagcaataagagtattga
ttcgaatagaattaggtcagactggtaattttataggagatgaccatttgtataatgtga
ttgttacagctcatgcttttgttatgattttttttatagttatacctattataattggtg
gttttggtaattggttagtacctttaatattaggtgctcctgatatggcttttcctcgta
tgaataatttgagtttttgattattgcctccttctttaatattattgtttatttcatcta
tggctgaaatgggtgtgggagctgggtgaacagtatatccaccgttggcttctattgtag
gacataatggaagttctgtagattttgctattttttctttacatttagctggtgcttctt
ctattataggggctatcaattttatttcaactgttattaatatacgatctattggtatgt
ccttagataatatccctttatttgtttggtctgtagtgattacagcggtattattattgt
tatctctacctgtgttagctggtgctattactatattgttaacagatcgtaattttaata
cttctttttttgatcctgcagggggaggggatcctattttatttcaacattta
>SMNKARA08883_Euophrys_frontalis_8y66E_49y33N_ad_m_A_Salticidae
ctttatatctaatttttggggtttgatcggcaatggtaggtacagcaataagagtattga
ttcgaatagaattaggtcagactggtaattttataggagatgaccatttgtataatgtga
ttgttacagctcatgcttttgttatgattttttttatagttatacctattataattggtg
gttttggtaattggttagtacctttaatattaggtgctcctgatatggcttttcctcgta
tgaataatttgagtttttgattattgcctccttctttaatattattgtttatttcatcta
tggctgaaatgggtgtgggagctgggtgaacagtatatccaccgttggcttctattgtag
gacataatggaagttctgtagattttgctattttttctttacatttagctggtgcttctt
ctattataggggctatcaattttatttcaactgttattaatatacgatctattggtatgt
ccttagataatatccctttatttgtttggtctgtagtgattacagcggtattattattgt
tatctctacctgtgttagctggtgctattactatattgttaacagatcgtaattttaata
cttctttttttgatcctgcagggggaggggatcctattttatttcaacattta
>SMNKARA08884_Euophrys_frontalis_8y22E_48y55N_ad_m_A_Salticidae
ctttatatttaatttttggggcttgatcagcaatggtaggtacagcaatgagagtattga
ttcgaatggaattaggtcagactggtaattttataggagatgaccatttgtataatgtga
ttgttacagcccatgcttttgttatgattttttttatagttatacctattataattgggg
gttttggtaactggttagtacctttaatattaggtgctcctgatatggcttttcctcgta
tgaataatttgagtttttgattgctgcccccttctttaatattgttgtttatctcatcta
tggctgaaatgggtgtgggagctgggtgaacagtatacccaccgttggcttctattgtag
gacataatgggagttctgtagattttgctattttttctttacatttagctggtgcttctt
ctattataggggctatcaattttatttcaactgttattaatatacgatctattggtatat
ccttagataagatccctttatttgtttggtctgtagtgattacagtggtattattattgt
tatctctacccgtgttagctggtgctattactatattattgacagatcgtaattttaata
cttctttttttgatcctgcggggggaggggaccctattttatttcaacattta
>SMNKARA08885_Sibianor_larae_8y22E_48y55N_ad_m_A_Salticidae
ctttatatttagtttttggagtgtgagcggctatagctggaacagctataagagttttaa
ttcgaatggaattaggtcaaactggtagttttttaggaagagatcatatatataatgtta
ttgttactgctcatgcttttgttataattttttttatagttatgcctattttaattggag
gatttggtaattggttggttccattaatattaggtgctcctgatatggcttttcctcgta
taaataatttaagtttttgattattacctccttctttaatattattatttatttcatcta
tggttgaaataggagtgggggctggatggacagtttatcctcctttggcttctttagtag
gacatgggggtagatcagtagattttgctattttttcgttacatttggctggagcatcat
ctattataggagctattaattttatttctactattattaatatacgttcagttagaatat
taatagataggattcctttatttgtttggtctgtaattattactgctgtcttgctcttgc
tttcattaccagtattagctggtgctattactatattattgacnnnnnnnnnnnnnnnnn
nnnnnnnnnnnnnnnnnnnnnnnnnnnnnnnnnnnnnnnnnnnnnnnnnnnnn
>SMNKARA08886_Talavera_aequipes_8y22E_48y55N_ad_m_A_Salticidae
ctttgtatttaatttttggtgcttggtcggctatagtgggtactgctataagagttttaa
ttcgtatagagttaggtcagacagggaattttataggtgatgatcatttatataatgtaa
ttgttactgctcatgcttttgttataattttttttatggtaatacctattttgattggag
gatttggtaattgattggttcctttaatattaggggctcctgatatagcttttcctcgta
taaataatttgagattttgattgttacccccatcattaatactattatttatttcttcta
tagctgaaataggggttggggcaggatggacagtatatcctcctttggcttctattgttg
gacataatgggagatctgtggattttgctattttttctttacacttggctggtgcttctt
ctattatgggggctattaattttatttcaacgattattaatatacgctctgtagggatgt
ctttggataaggttcctttatttgtttggtctgtggttattacggctgttttattattgt
tatctttaccagtgttagctggtgctattactatattgttaactgatcgtaattttaata
cgtctttttttgatcctgcaggagggggagatcctattttatttcaacattta
>SMNKARA08887_Tegenaria_ferruginea_8y42E_47y66N_ad_m_A_Agelenidae
cgttgtatttaatttttggggcttggtctgctatagttgggactgcaataagagtattga
ttcggattgaattgggtcaaccagggagatttattggtgatgatcatttatataatgtga
ttgttacggctcatgcttttgttataattttttttatagttataccaattataattgggg
gttttgggaattgattaattcctttaatgttgggggcgcctgatatagcttttccacgaa
tgaataatttaagtttttgattgttgcctccttctttatttatattatttatttcttcta
tagtggatataggagttggagcagggtgaactatttatcctcctttggcttcttctcttg
ggcatataggaagatcgatggattttgcaattttttctttgcatttggctggggcatctt
cgattataggagctattaattttatctctaccattattaatatacgttcagttggtataa
gaatagaaaagattcctttatttgtttggtcagttttaattactgctattttattattat
tgtctttaccggtattagcgggagctattacaatattgttgactgatcgaaatttcaata
cttcattttttgatcctgctggggggggtgatcctattttatttcagcattta
>SMNKARA08888_Amaurobius_ferox_8y42E_47y66N_ad_f_A_Amaurobiidae
cgttatatttaatttttggtgcatggtctgctatagttgggatagctataagagttttaa
ttcgggtagaattaggacaaacaggaagattattaggagatgatcatttgtataatgtga
ttgttacagctcatgcttttgttatgattttttttatggttatacctattatgattgggg
gatttggaaattgaatggttccattaatattaggagctccggatatagcttttcctcgaa
taaataatttaagtttttgattattacctccttctttatttttattatttatttcttcta
tagtagaaataggagttggagcaggatgaacaatttatcctcctttagtttctttaattg
gacattcaggaagatctgtagattttgctattttttctttgcatttagctggagcttctt
caattatgggagctgttaattttatttcaactattattaatatacggttaattggaatga
gaatagaaaagattcctttatttgtttgatcaatttttattactgtaattttattattat
tatcattacctgttttagcgggtgctattactatattattgatggatcgaaattttaata
cttctttttttgatcctgctgggggtggggatcctattttatttcaacattta
>SMNKARA08889_Atypus_piceus_9y89E_48y54N_ad_f_A_Atypidae
ctttgtatataatttttggaatttgatcaggtattataggaatatctatgagaataatta
ttcggattgagttaggtatattgggaagttttttaggaaatgatcagctttataatgtga
ttgtaactagtcatgcttttgttatgattttttttatagtaataccgattataatagggg
ggtttggaaattgattaattcctttaataattggagcgcctgatatggctttccctcgga
tgaataatttaagtttttggttattacctccttctttgttttttttaatgttgtctgctt
ttttagatgttggggtgggaacagggtgaacattatatcctcctctttcttcaataatgt
ttcagtcaggggtaagagtagattttgctattttttcgttacacttagcgggggcttctt
ctattataggttctattaattttatttcaactgttattaatatgcggtctgagggaataa
gaatagataaggtgcctttatttgtttggtctgtaataattactgcaattttattattat
tggctttaccagtactagctggtgctattactatgttattaactgatcgaaattttaata
caactttttttgatccttctgggggtggtgatcctattttatttcaacattta
>SMNKARA08890_Eresus_kollari_8y66E_49y33N_ad_f_A_Eresidae
cattatatttaatttttggagcttggtcggctatggttggaacttcaataagaataatta
ttcgaacagaattaggacaatctgggagattattaggagatgatcatctgtataatgttg
ttgttactgctcatgcttttgtaatgattttttttatagttataccaattttaattggag
ggtttgggaattgattagttcctttaatattaggagcacctgatatagcttttcctcgaa
taaataatttaagtttttggttgttacctccttcattgtttatattatttatgtcttcta
tggtagagatgggtgtaggaacagggtgaactgtttatcctcctttggcttcattaatag
gccattcgggaagatcagtggattttgctattttttcattacatttagctggggcttctt
ctattataggagctattaatttcattacaactgtaattaatatacgttcatatggaataa
ctatagagaaggtaccattatttgtttggtctgtattaattactgcagtattattattac
tatctttacctgttttagcaggtgctattacaatattattaactgatcgaaattttaata
catcgttttttgaccctgctgggggaggggacccgattttatttcaacattta
>SMNKARA08891_Harpactea_rubicunda_8y42E_47y66N_ad_m_A_Dysderidae
ctttatatttattgtttggggcttggtcggctatagctggtacagctatgagtgttatta
ttcgggtggagttaggtcagttgggtagattattgggggatgatcatttgtataatgtgg
ttgttacagcgcatgcgctggttatgattttttttatggttatgccgattatgattgggg
gttttggaaattggttggttccattgatgttgggggctcctgatatagcttttcctcgaa
taaataatttgagtttttggttgttacctccgtcattaattttattaattttgtcttcta
tggtggagatgggggtaggggcagggtggactatttacccacctttgtcggcttctttgg
ggcatgcaggggtgtctgtagatttggctattttttctcttcatttggctggtgcttctt
cgattataggagctattaattttatttctactattattaatatgcgaatgtatggtatga
gaatggataagattcctttgtttgtttggtctgttttggtgacggcagtgcttttgttat
tatcgttgcctgttttggcgggggctattactatgctattgacagatcgtaactttaata
cttctttttttgacccggcaggagggggggatcctattttgtttcagcatttg
>SMNKARA08892_Harpactea_rubicunda_8y42E_47y66N_ad_f_A_Dysderidae
ctttatatttattgtttggggcttggtcggctatagctggtacagctatgagtgttatta
ttcgggtggagttaggtcagttgggtagattattgggggatgatcatttgtataatgtgg
ttgttacagcgcatgcgctggttatgattttttttatggttatgccgattatgattgggg
gttttggaaattggttggttccattgatgttgggggctcctgatatagcttttcctcgaa
taaataatttgagtttttggttgttacctccgtcattaattttattaattttgtcttcta
tggtggagatgggggtaggggcagggtggactatttacccacctttgtcggcttctttgg
ggcatgcaggggtgtctgtagatttggctattttttctcttcatttggctggtgcttctt
cgattataggagctattaattttatttctactattattaatatgcgaatgtatggtatga
gaatggataagattcctttgtttgtttggtctgttttggtgacggcagtgcttttgttat
tatcgttgcctgttttggcgggggctattactatgctattgacagatcgtaactttaata
cttctttttttgacccggcaggggggggggatcctattttgtttcagcatttg
>SMNKARA08893_Alopecosa_cuneata_8y58E_48y89N_jv_f_A_Lycosidae
ctttatatttaatattaggtatttgatcggctataataggaactgctatatcagtattaa
ttcgaatggaattaggtaatcctgggagtctattaggagatgatcatttatataatgtta
tagttactgctcatgcttttgtaatgattttttttatagtaataccaattcttattggtg
ggtttggtaattgattagttcctttaatattaggagctcctgatatatcatttcctcgta
taaataatctttctttttgattattacctccttctttatttttgttatgtatatcttcta
tagtagaaataggggtaggagctggttgaactgtttatcctcctttagcatcgagaatag
gtcatacaggaagttctatggattttgctattttttctcttcatttagctggagcttctt
ctattataggagcagtaaattttatttctactattattaatatacgaatattaggtatat
caatagagaaagttcctttatttgtttgatcagttttgattacagcagttttattattac
tttctttacctgttttagcaggtgctattactatattattaactgatcgaaattttaata
cttctttttttgatccagcaggtggaggggatcctattttatttcaacattta
>SMNKARA08894_Alopecosa_cuneata_8y58E_48y89N_jv_f_A_Lycosidae
ctttatatttaatattaggtatttgatcggctataataggaactgctatatcagtattaa
ttcgaatggaattaggtaatcctgggagtctattaggagatgatcatttatataatgtta
tagttactgctcatgcttttgtaatgattttttttatagtaataccaattcttattggtg
ggtttggtaattgattagttcctttaatattaggagcccctgatatatcatttcctcgta
taaataatctttctttttgattattacctccttctttatttttgttatgtatatcttcta
tagtagaaataggggtaggagctggttgaactgtttatcctcctttagcatcaagaatag
gtcatacaggaagttctatggattttgctattttttctcttcatttagctggggcctctt
ctattataggagcagtaaattttatttctactattattaatatacgaatattaggtatat
caatagagaaagttcctttatttgtttgatcagttttgattacagcagttttattattac
tttctttacctgttttagcaggtgctattactatattattaactgatcgaaattttaata
cttctttttttgatccagcaggtggaggggatcctattttatttcaacattta
>SMNKARA08895_Alopecosa_sulzeri_8y66E_49y33N_ad_m_A_Lycosidae
ctttgtatttaatattgggtgtttggtcagcaataataggtactgctatatcagtattaa
ttcgaatggagttaggtaatcctggaagtttattaggggatgatcatttatataatgtta
tggttactgctcatgcttttgttatgattttttttatagttataccaattcttattggtg
gttttggtaattggttagttcctttaatgttaggggctcctgatatatcttttcctcgta
taaataatctttctttttgattgttacctccttctttgtttttattgtgtatatcttcta
tagtagaaataggagtaggggctggttgaactgtatatccacctttagcgtcaagaatag
gtcatataggaagttctatagattttgctattttttctcttcatttagctggggcttctt
ctattataggtgcagtgaattttatttctactattgttaatatacgaatagttgggataa
caatagagaaagttcctttatttgtttgatcagttttaattacagctgttttattattac
tttctttacctgttttagcgggtgcaattactatattattaacggatcggaattttaata
cttctttttttgatccggcaggtggaggagatcctattttatttcaacattta
>SMNKARA08896_Pardosa_hortensis_8y66E_49y33N_ad_f_A_Lycosidae
ctttgtatttaatatttggagtttgatcggctataataggaactgctataagagtattaa
ttcggatagagttaggaaatcctggaagattattaggtgatgatcatttatataatgtta
tagttactgctcatgcttttgtaatgattttttttatagtgataccaattcttattggag
gatttggaaattgattggttcctttaatattgggtgctccagatatatcgtttcctcgga
taaataatctttctttttgattattacctccttctttgtttttattatctatatcctcta
tagtggagataggagttggtgctggatgaactgtttatcctcctttagcgtctacggttg
gtcatataggaagttcaatagattttgctattttttctcttcatttagctggggcttctt
ctattataggtgctgtaaattttatttctactattattaatatacgaatattaggtatat
ctatagagaaagttcctctttttgtttggtcagtattaattactgcagtattattgttgc
tttctttaccggttttagcgggtgctattactatattattaacagttcgtaattttaata
cttctttttttgatcctgctgggggtggtgatcctattttatttcaacattta
>SMNKARA08897_Xerolycosa_nemoralis_8y66E_49y33N_ad_f_A_Lycosidae
ctttatatttaatatttggggtatgatcagctatagctggaactgctataagagtattga
ttcgaatagaattaggaaactctggtagtttattaggtgatgatcatttatataatgttg
ttgtaactgctcatgcttttgtgataattttttttatggttatacctattttgattggtg
ggtttggtaattgattagttcctttaatattaggagctcctgatatatcatttcctcgga
taaataatctttctttttgattattacctccttctttatttttattgtttatatcttcta
tagtagaaataggagttggagctggatgaacagtttatcctcctttggcttctagagttg
gacatataggaagttctatagattttgctattttttctcttcatttagctggggcttctt
ctattataggggcagtaaattttatttctactattattaatatacgtttagttggaataa
caatagaaaaagtacctttatttgtatgatctgtgttaattaccgctattttattattat
tatctttacctgttttagcaggagctattactatattattgactgatcgtaattttaata
cttctttttttgatcctgctggaggaggagatccaattttatttcaacatttg
>SMNKARA08898_Asagena_phalerata_8y66E_49y33N_ad_m_A_Theridiidae
ctttatatttattatttggggcttgatctgctatagtaggcacagctataagagttttaa
ttcgggtggagttagggcaaccaggaaggttactaggagatgatcaattgtataatgtta
ttgtaaccggtcatgcgtttattatgattttctttatagtaatgcctattttaattggag
gttttggaaattggttagttcctttaatattaggggctcctgatatggcttttcctcgaa
taaataatttaagtttttgattattacctccttctttaatacttttgtttatctcttcta
tggaagagataggagtaggagcaggatggactatttatcctcctttatcttctttagaag
gtcatagaggaagatctgtagattttgctattttttctttacatttagctggggcttctt
ctattataggggctattaattttatttctacaattttaaatatacgtttgtttgggataa
ctatagaaaaggttagattgtttgtttggtctgtattgatcactgctgtattattattat
tatctttgcctgttttagcgggggctattaccatattacttactgatcgcaattttaata
cttctttttttgatcctgctggagggggggatcctattttatttcaacatttg
>SMNKARA08899_Episinus_angulatus_8y22E_48y55N_ad_f_A_Theridiidae
cgttatatttattatttggggcttgggcagctatagtaggaacagcaataagaattttaa
ttcgaatagaattaggacagcctggaagatttttaggggatgatcagttgtataatgtag
tggttactgctcatgcatttgtaataattttttttatagtgataccaattttaattgggg
gatttgggaattgattagttcctttaatattaggagctcctgatatagcttttcctcgaa
taaataatttaagattttggttattacctccttcattaatattattatttatttcttcaa
tagtggaaataggagtaggggctggatggacagtttatcctcctttatcttctttagaag
gtcattttggtagaagagtagattttgctattttttctttacatttagcgggagcgtcat
caattataggagctattaatttcatttcaacaattttaaatatacgaatatatggaatat
ctatagaaaaggtttcattatttgtttgatctgtattaattacagcggtattattattat
tatctttaccagttttagctggagctattactatattattaactgatcgaaattttaata
cttcgttttttgatccggctggtggaggagatcctattttatttcaacatttg
>SMNKARA08900_Robertus_lividus_8y22E_48y55N_ad_m_A_Theridiidae
ctttatatttgatttttggggtgtgatcagctatagttggtacagctatgagtgtcctaa
ttcgggtagaattaggacaatctggaagattgttaggggatgatcaattatataatgtaa
ttgtaactgctcatgcttttgtaataattttttttatagtaatacctattataattgggg
ggtttggaaattgattagttcctttaatgttaggggctccagatatagctttccctcgaa
taaataatttaagattttgattattacctccttctttatttctattatttatttcttcta
taattgaaataggagtaggtgctgggtgaacaatttatcctcctttatcttctttagagg
gtcattcaggaagatcagttgattttgcgattttttctcttcatcttgcaggtgcttctt
ctattataggggctgtaaattttatttctactattttaaatatacgtgtgtatggaatat
ctatagaaaaagttactttatttgtatgatcagttttaattactgctattcttttattat
tatcgttacctgttttagcaggagctattactatgttattaactgatcgaaattttaata
cttctttttttgatccttctggaggaggagatccaattttatttcaacattta
>SMNKARA08901_Robertus_scoticus_8y22E_48y55N_ad_m_A_Theridiidae
ctttgtatttaatttttggggtatggtcggctatggttggtacagcaataagagtattaa
ttcgagttgaattaggacaatctggtagattattaggagatgatcaattatataatgtaa
ttgttactgctcatgcttttattataattttttttatagtaatacctattatgattggag
gatttggaaattgattaattcctttgatattaggagctcctgatatagcttttcctcgaa
taaataatttaagattttgattattacctccttctttatttttattatttatttcttcta
tagtagagataggtgtaggggctggatgaactatttatccacctttgtcttctttagaag
gacattcaggtagatcagttgattttgctattttttctcttcatcttgcaggtgcttctt
ctattataggagctgttaattttatttctactatttttaatatacgtgtatatggtatat
caatggagaaattgactttatttgtatggtcagttttaattactgctattttattattat
tatcattacctgtattagcaggagctattactatattattaactgatcgaaattttaata
cttctttttttgatccttcaggaggaggtgatccaattttatttcaacattta
>SMNKARA08903_Ozyptila_scabricula_8y66E_49y33N_ad_m_A_Thomisidae
cgttatatttattatttggtgcttgatcagcaatagttggaactgcaataagagttttaa
ttcggatggagttaggtaatgtggggagattattaggaaatgatcatttatataatgttg
ttgttactgctcatgcttttgtaatgattttttttatagtaatgccaattttaattggtg
gatttggaaattggttagttcctttaatactaggggctccggatatatcttttcctcgaa
taaataatttatctttttgacttcttcctccctcgttgtttttgttatttatatcttcta
tagttgaaataggagtaggggcagggtggacggtgtatcctcctttggcttcgagagtag
gtcatataggcagatctatagattttgctattttttctcttcatttagctggtgcttctt
ctattataggagctgttaattttatttctacaattattaatatacgaactgtaggaataa
ctatagagaaggtacctttgtttgtatgatctgtattaattacggctattttattacttt
tatcattgccggttttggcaggggctattactatattattaacagatcgtaattttaata
cttctttttttgatcctgctggaggaggagatcctattttatttcaacatttg
>SMNKARA08904_Tmarus_piger_8y66E_49y33N_ad_m_A_Thomisidae
ctttatatttattatttggagcgtgatcggctatagtaggaactgctataagagtattaa
ttcgaatggaattagggaattcaggaagacttcttggtaatgatcatttatataatgtta
ttgtaactgctcatgcttttgtgataattttttttatagtaatacctattttaattggag
gttttggtaactggttagtacctttaatattaggagctcctgatatatcttttcctcgaa
tgaataatttatctttttggttattacctccttctttatttttattatttatgtcttcta
tagtggagataggagtaggggctggatgaactgtgtatccacctttggcttctagtttag
gacatatagggagatcaatggattttgctattttttctcttcatttagctggagcttctt
caattataggggctgtaaattttatttctactattattaatatgcgaagagtaggaataa
ctatggaaaaggtacctttatttgtttgatcagtattaattactgctattttacttttat
tgtcattgcctgttttagcaggggctattactatactattgacagatcgtaattttaata
catcattttttgatcctgctgggggaggggatccaattttatttcaacattta
>SMNKARA08905_Xysticus_acerbus_8y58E_48y89N_jv_m_A_Thomisidae
ctttatatttactttttggagcttgatctgctatagttggtactgcaataagagttttga
ttcgaatagagttggggaatgtaggtagattattaggaaatgatcatttatataatgtta
ttgtaacagctcatgcttttgttatgattttttttatagtaatacctattttaattggag
ggtttggaaattgattggttccattaatattaggtgctcctgatatatcttttcctcgta
taaataatttatctttttggttacttcctccttctttatttttgttatttatatcatcta
tagtggaaataggtgtaggagcaggatgaactgtttatcctcctttggcatcaagtgtag
gtcatataggaagatctatagattttgctattttttctcttcatttagcgggtgcttctt
caattataggtgctgttaattttatttccactattattaatatacgtgtaacagggatat
ctatagaaagggtacctttgtttgtgtgatctgttctaattacagctattcttcttcttt
tgtctttacctgttttagcaggggctattactatattattaacagatcgaaattttaata
cttcttttttcgaccctgcagggggaggggatcctattttatttcaacattta
>SMNKARA08906_Xysticus_acerbus_8y58E_48y89N_jv_m_A_Thomisidae
ctttatatttactttttggagcttgatctgctatagttggtactgcaataagagttttga
ttcgaatagagttggggaatgtaggtagattattaggaaatgatcatttatataatgtta
ttgtaacagctcatgcttttgttatgattttttttatagtaatacctattttaattggag
ggtttggaaattgattggttccattaatattaggtgctcctgatatatcttttcctcgta
taaataatttatctttttggttacttcctccttctttgtttttgttatttatatcatcta
tagtggaaataggtgtaggagcaggatgaactgtttatcctcctttggcatcaagtgtag
gtcatataggaagatctatagattttgctattttttctcttcatttagcgggtgcttctt
caattataggtgctgttaattttatttctactattattaatatacgtgtaacagggatat
ctatagaaagggtacctttgtttgtgtgatctgttttaattacagctattcttcttcttt
tgtctttacctgttttagcaggggctattactatattattaacagatcgaaactttaata
cttcttttttcgatcctgcaggaggaggggatcctattttatttcaacattta
>SMNKARA08908_Xysticus_cristatus_8y66E_49y33N_jv_f_A_Thomisidae
cattatatttattgtttggtgcttgatctgctatagttggaactgcgataagagtattaa
ttcgaatggaattaggaaatgtgggtagattattaggaaatgatcatctatataatgtta
ttgttacagctcatgcttttgtaatgattttttttatagtaatacctattttgattggtg
gatttggaaattgattagtacctttaatattaggtgctcctgatatatcttttcctcgga
taaataatttgtctttttgattacttcctccttcgttatttttattatttatatcatcta
tagtagaaataggtgtgggtgcaggatgaactgtttatcctcctttggcttctagtgtag
gacatataggaagatcaatagattttgctattttttctttacatttagcaggtgcttctt
ctattataggggctgttaattttatttctactattattaatatacgagtaactggaatga
gtatggaaaaagttcctttatttgtttgatctgttttaattacagctattttacttcttt
tatctttacctgttttagctggagctattactatgttacttactgatcgtaattttaata
cttctttctttgaccctgctgggggaggggatccaattttattccaacattta
>SMNKARA08909_Xysticus_bifasciatus_8y58E_48y89N_ad_f_A_Thomisidae
ctttatatttattatttggtgcttgatcagctatagttggtactgcaataagagttttaa
tccgtatagaattagggaatgtagggagattattaggaaatgatcatttatataatgtaa
ttgttacagctcatgcttttgttataattttttttatagttatacctattttaattggtg
gatttggaaattggttagtacctttaatgttaggtgctcctgatatatcttttcctcgaa
taaataatttatctttctggttacttcctccttctttgtttttattatttatgtcatctt
tagtagaaataggtgttggggctggatgaactgtttatcctcctttagcatcaagtgttg
gtcatataggaagatctatagattttgctattttttctcttcatttggctggggcttctt
caattataggtgctgtaaattttatttctacaattattaatatacgagttacaggaataa
ctatggaaaaagttcctttgtttgtatgatctgtattaattacagctattttacttttat
tgtctttgcctgttttggcaggggctattacaatattattaactgatcggaattttaata
cttctttttttgatcctgcaggtgggagggatcctattctgtttcaacattta
>SMNKARA08910_Xysticus_bifasciatus_8y58E_48y89N_ad_f_A_Thomisidae
ctttatatttattatttggtgcttggtcagctatagttggtactgcaataagagttttaa
tccgtatagaattagggaatgtaggaagattattaggaaatgatcatttgtataatgtaa
ttgttacagctcatgcttttgttataattttttttatagtaatacctattttaattggtg
gatttggaaattggttagtacctttaatgttaggtgctcctgatatatcttttcctcgaa
taaataatttatctttctggttacttcctccttctttgtttttattatttatatcatctt
tagtagaaataggtgttggggctggatgaactgtttatcctcctttagcatcaagtgttg
gccatataggaagatctatggattttgctattttttctcttcatttggctggggcttctt
caattataggtgctgtaaattttatttctacaattattaatatacgagttacaggaataa
ctatggaaaaagttcctttgtttgtatgatctgtattaattacagctattttacttttat
tatctttacctgttttggcaggggctattacaatattattaactgatcggaattttaata
cttctttttttgatcctgcaggtgggggggatcctattttgtttcaacattta
>SMNKARA08911_Xysticus_cristatus_8y58E_48y89N_ad_m_A_Thomisidae
cattatatttattgtttggtgcttgatctgctatagttggaactgcgataagagtattaa
ttcgaatggaattaggaaatgtgggtagattattaggaaatgatcatctatataatgtta
ttgttacagctcatgcttttgtaatgattttttttatagtaatacctattttgattggtg
gatttggaaattgattagtacctttaatattaggtgctcctgatatatcttttcctcgga
taaataatttgtctttttgattacttcctccttcgttatttttattatttatatcatcta
tagtagaaataggtgtgggtgcaggatgaactgtttatcctcctttggcttctagtgtag
gacatataggaagatcaatagattttgctattttttctttacatttagcaggtgcttctt
ctattataggggctgttaattttatttctactattattaatatacgagtaactggaatga
gtatggaaaaagttcctttatttgtttgatctgttttaattacagctattttacttcttt
tatctttacctgttttagctggagctattactatgttacttactgatcgtaattttaata
cttctttctttgaccctgctgggggaggggatccaattttattccaacattta
>SMNKARA08912_Xysticus_kochi_8y66E_49y33N_ad_f_A_Thomisidae
cattatatttgttatttggtgcttgatctgctatagttgggactgcaataagtgtattaa
ttcgaatggaattgggtaatgtaggtagattattaggaaatgatcatctatataatgtta
ttgttacagctcatgcttttgtaataattttttttatagtaatacctattttgattggtg
gttttggaaactgattagtaccgttgatattaggtgctcctgatatatcttttcctcgaa
taaataatttatctttttgattacttcctccttcattatttttattatttatatcatcta
tagtagaaataggtgtaggtgcaggatgaactgtttatcctcctttggcttctagtgtag
ggcatatgggaagatcaatagattttgctattttttctttacatttagcaggtgcttctt
ctattataggagctgttaattttatttcaactattattaatatacgagtaactgggataa
gaatggaaaaagttcctttatttgtttggtctgttttaattacagctattttacttcttt
tatctttacctgttttagctggagctattactatattacttactgatcgtaattttaata
cttctttctttgatcctgctggaggaggggatccaattttatttcaacattta
>SMNKARA08913_Xysticus_kochi_8y66E_49y33N_ad_f_A_Thomisidae
cattatatttattatttggtgcttgatctgctatagttgggactgcaataagtgtattaa
ttcgaatggaattagggaatgtaggtagattattaggaaatgatcatctatataatgtta
ttgttacagctcatgcttttgtaataattttttttatagtaatacctattttgattggtg
gttttggaaattgattagtaccattaatattaggtgctcctgatatatcttttcctcgaa
taaataatttgtctttttggttgcttcctccttcattatttttattatttatatcgtcta
tagtagaaataggtgtaggagcaggatgaactgtttatcctcctttagcttctagtgtag
ggcatataggaagatcaatagattttgctattttttctttacatttagcgggtgcttctt
ctattataggagctgttaattttatttcaactattattaatatacgagtaactggaataa
gaatggaaaaagttcctttatttgtttgatctgttttaattacagctattttacttcttt
tatctttgcctgttttagctggagctattactatattacttactgatcggaattttaata
cttctttctttgatcccgctggaggaggggatccaattttatttcaacattta
>SMNKARA08914_Xysticus_kochi_8y66E_49y33N_jv_f_A_Thomisidae
cattatatttgttatttggtgcttgatctgctatagttgggactgcaataagtgtattaa
ttcgaatggaattagggaatgtaggtagattattaggaaatgatcatctatataatgtta
ttgttacagctcatgcttttgtaataattttttttatagtaatgcctattttgattggtg
gttttgggaattgattagtaccattaatattaggtgctcctgatatatcttttcctcgaa
taaataatttgtctttttggttacttcctccttcattatttttattatttatatcgtcta
tagtagaaataggtgtaggagcaggatgaactgtttatcctcctttagcttctagtgtag
ggcatataggaagatcaatagattttgctattttttctttacatttagcgggtgcttctt
ctattataggagctgttaattttatttcaactattattaatatacgagtaactgggataa
gaatggaaaaagttcctttatttgtttgatctgttttaattacagctattttacttcttt
tatctttacctgttttagctggagctattactatattacttactgatcgaaattttaata
cttctttctttgatcccgctggaggaggggatccaattttatttcaacattta
>SMNKARA08915_Xysticus_kochi_8y66E_49y33N_ad_f_A_Thomisidae
cattatatttgttatttggtgcttgatctgctatagttgggactgcaataagtgtattaa
ttcgaatagaattaggtaatgtaggtagattattaggaaatgatcatctatataatgtta
ttgttacagctcatgcttttgtaataattttttttatagtaatacctattttgattggtg
gttttggaaattgattagtaccgttaatattaggtgctcctgatatgtcttttcctcgaa
tgaataatctatctttttgattacttcctccttcattatttttattatttatatcatcta
tagtagaaataggtgtaggtgcaggatgaactgtttatcctcctttggcttctagtgtag
ggcatatgggaagatcaatagattttgctattttttctttacatttagcaggtgcttctt
ctattataggagctgttaattttatttcaactattattaatatacgagtaactgggataa
gaatggaaaaagttcctttatttgtttggtctgttttaattacagctattttacttcttt
tatctttacctgttttagctggagctattactatattacttactgatcgtaattttaata
cttctttctttgatcctgctggaggaggggatccaattttatttcaacattta
>SMNKARA08916_Xysticus_kochi_8y66E_49y33N_ad_f_A_Thomisidae
cattatatttattatttggtgcttgatctgctatagttgggactgcaataagtgtattaa
ttcgaatggaattagggaatgtaggtagattattaggaaatgatcatctatataatgtta
ttgttacagctcatgcttttgtaataattttttttatagtaatacctattttgattggtg
gttttgggaattgattagtaccattaatattaggtgctcctgatatatcttttcctcgaa
taaataatttgtctttttggttgcttcctccttcattatttttattatttatatcgtcta
tagtagaaataggtgtaggagcaggatgaactgtttatcctcctttagcttctagtgtag
ggcatataggaagatcaatagattttgctattttttctttacatttagcgggtgcttctt
ctattataggagctgttaattttatttcaactattattaatatacgagtaactggaataa
gaatggaaaaagttcctttatttgtttgatctgttttaattacagctattttacttcttt
tatctttacctgttttagctggagctattactatattacttactgatcgaaattttaata
cttctttctttgatcccgctggaggaggggatccaattttatttcaacattta
>SMNKARA08917_Xysticus_acerbus_8y58E_48y89N_ad_f_A_Thomisidae
ctttatatttactttttggagcttgatctgctataattggtactgcaataagagttttga
ttcgaatagagttggggaatgtaggtagattattagggaatgatcatttatataatgtta
ttgtaacagctcatgcttttattatgattttttttatagtaatacctattttaattggag
ggtttggaaattgattggttccattaatattaggtgctcctgatatatcttttcctcgta
taaataatttatctttttgattacttcctccttctttgtttttgttatttatatcatcta
tagtggaaataggtgtgggatcaggatgaactgtttatcctcctttggcatcaagtgtag
gtcatataggaagatctatagattttgctattttttctcttcatttagcgggtgcttctt
caattataggtgctgttaattttatttctactattattaatatacgtgtaacagggatat
ctatagaaagggtacctttgtttgtgtgatctgttctaattacagctattcttcttcttt
tgtctttacctgttttagcaggggctattactatattattaacagatcgaaactttaata
cttcttttttcgaccctgcaggaggaggggatcctattttatttcaacattta
>SMNKARA08918_Zora_spinimana_8y66E_49y33N_ad_f_A_Miturgidae
ctttgtatttaatttttggagtttgatctgctatagtaggaactgctataagaatattaa
ttcgtatagaattaggacaagttggaagatttatgggggatgatcatttatataatgtaa
ttgttaccgctcatgcgtttgttataattttttttatagttatgcctattatgattgggg
gattcggaaattggttgattcctttaatgttaggagctcctgatatagcttttcctcgaa
taaataatttaagattttgattattacctccttctttattattattatttatttcttcta
tagttgaaataggagttggagctgggtgaacagtttatcctcctttagcttctgtaatag
gtcattctggaagagccatagattttgctattttttctttacatttagctggtgcttcat
ctattataggggctattaattttatcactactgtaattaatatacgatctattggaataa
ctatagaaaagattcctttgtttgtatgatcagttgcaattactgctgttcttttattat
tatctttaccagtattagctggtgctattactatattattgactgatcgtaattttaata
cttctttttttgatcctgcggggggaggagatccaattttgtttcaacattta
>SMNKARA08919_Metellina_merianae_9y45E_48y52N_ad_f_A_Tetragnathidae
cattgtattttatttttggggcttgagctgctatagtgggtacagcgataagagtattaa
ttcggattgaattaggacagtctggaagattgttgggggatgatcagctttataatgtta
ttgtaacagcacatgcatttgttataattttttttatagttatacctgttttaattgggg
ggttcggtaattggttggttccgttaatgttaggggctccggatatagcgtttcctcgaa
taaataatttaagtttttggctgttacctccatcattttttttgttattagtttcttcta
tagtggatataggggtgggagctgggtggacaatttatcctcctttggcttcattagagg
ggcatgcagggagatcaatggattttgcaattttttctttacatttagcgggggcttctt
caattataggggctattaattttatttctactattttaaatatgcgttcttggggcataa
gaatagaaaaagttccactttttgtgtggtctgtgttaattacggccgtattgttgcttc
tttctttacctgttttagctggtgcgattacgatattattaacagatcgtaattttaata
cttctttttttgatccttcgggaggaggggatcctattctttttcaacattta
>SMNKARA08920_Metellina_merianae_9y45E_48y52N_ad_f_A_Tetragnathidae
cattgtattttatttttggggcttgagctgctatagtggggacagcgataagagtactaa
ttcgaattgaattaggacagtctggaagactgttgggggatgatcagctttataacgtta
ttgtaacagcacatgcattcgttataattttttttatagttatacctattttaattgggg
ggttcggtaactggttggttccgttaatgttgggggctccggatatagcgtttcctcgaa
tgaataacttaagtttttgactattacccccatcattttttttgttattagtttcttcta
tagttgatatgggggtgggagctgggtggacaatttatcctcctttggcttcattagagg
ggcatgcagggagatcaatggattttgcaattttttctttacatttagcgggggcttctt
caattataggggctattaattttatttctactattttaaatatgcgttcttggggtataa
gaatagaaaaagttccactttttgtgtggtctgtgttaattacggccgtattgctgcttc
tttctttacctgttttagcgggtgcgattacaatactattaacagatcgtaattttaata
cttctttttttgatccttcaggggggggggatcctattctttttcaacattta
>SMNKARA08921_Metellina_merianae_9y45E_48y52N_ad_m_A_Tetragnathidae
cattgtattttatttttggggcttgagctgctatagtgggtacagcgataagagtattaa
ttcggattgaattaggacagtctggaagattgttgggggatgatcagctttataatgtta
ttgtaacagcacatgcatttgttataattttttttatagttatacctgttttaattgggg
ggttcggtaattggttggttccgttaatgttaggggctccggatatagcgtttcctcgaa
taaataatttaagtttttggctgttacctccatcattttttttgttattagtttcttcta
tagtggatataggggtgggagctgggtggacaatttatcctcctttggcttcattagagg
ggcatgcagggagatcaatggattttgcaattttttctttacatttagcgggggcttctt
caattataggggctattaattttatttctactattttaaatatgcgttcttggggcataa
gaatagaaaaagttccactttttgtgtggtctgtgttaattacggccgtattgttgcttc
tttctttacctgttttagctggtgcgattacgatattattaacagatcgtaattttaata
cttctttttttgatccttcgggaggaggggatcctattctttttcaacattta
>SMNKARA08922_Larinioides_cornutus_9y86E_48y53N_ad_f_A_Araneidae
ctttatatttaatttttggtgcttgagctgctatagttggaactgcaataagagtattaa
ttcggattgaattaggtcaacctggtagatttataggggatgatcaattatacaatgtta
ttgtaactgctcatgcttttgtaataattttttttatggttataccaattttaattgggg
gttttggaaattgattggtacctttaatattaggagcacctgatatagcttttcctcgaa
taaataatttaagattttgattacttcccccatcattatttttattaattgtttcatcaa
tagtagaaataggagtaggtgctgggtgaaccgtttatccacctttagcaagattagaag
gacatgctggaaggtcagttgattttgctattttttcattacatttagctggggcatcat
caattataggtgctattaattttatttcaacaattattaatatacgtttttatggaataa
ctatggaaaaagttccactatttgtatgatcagttttgatcactgctgtattattacttc
tttcattaccagtattagctggggctattacaatattattaacagatcgaaattttaata
cttctttttttgacccttctgggggaggagatcctattttatttcagcatttg
>SMNKARA08923_Larinioides_cornutus_9y86E_48y53N_jv_A_Araneidae
ctttatatttaatttttggtgcttgagctgctatagttggaactgcaataagagtattaa
ttcggattgaattaggtcaacctggtagatttataggggatgatcaattatacaatgtta
ttgtaactgctcatgcttttgtaataattttttttatggttataccaattttaattgggg
gttttggaaattgattggtacctttaatattaggagcacctgatatagcttttcctcgaa
taaataatttaagattttgattacttcccccatcattatttttattaattgtttcatcaa
tagtagaaataggagtaggtgctgggtgaaccgtttatccacctttagcaagattagaag
gacatgctggaaggtcagttgattttgctattttttcattacatttagctggggcatcat
caattataggtgctattaattttatttcaacaattattaatatacgtttttatggaataa
ctatggaaaaagttccactatttgtatgatcagttttgatcactgctgtattattacttc
tttcattaccagtattagctggggctattacaatattattaacagatcgaaattttaata
cttctttttttgacccttctgggggaggagatcctattttatttcagcatttg
>SMNKARA08924_Larinioides_cornutus_9y86E_48y53N_jv_A_Araneidae
ctttatatttaatttttggtgcttgagctgctatagttggaactgcaataagagtattaa
ttcggattgaattaggtcaacctggtagatttataggggatgatcaattatacaatgtta
ttgtaactgctcatgcttttgtaataattttttttatggttataccaattttaattgggg
gttttggaaattgattggtacctttaatattaggagcacctgatatagcttttcctcgaa
taaataatttaagattttgattacttcccccatcattatttttattaattgtttcatcaa
tagtagaaataggagtaggtgctgggtgaaccgtttatccacctttagcaagattagaag
gacatgctggaaggtcagttgattttgctattttttcattacatttagctggggcatcat
caattataggtgctattaattttatttcaacaattattaatatacgtttttatggaataa
ctatggaaaaagttccactatttgtatgatcagttttgatcactgctgtattattacttc
tttcattaccagtattagctggggctattacaatattattaacagatcgaaattttaata
cttctttttttgacccttctgggggaggagatcctattttatttcagcatttg
>SMNKARA08925_Larinioides_cornutus_9y86E_48y53N_jv_A_Araneidae
ctttatatttaatttttggtgcttgagctgctatagttggaactgcaataagagtattaa
ttcggattgaattaggtcaacctggtagatttataggggatgatcaattatacaatgtta
ttgtaactgctcatgcttttgtaataattttttttatggttataccaattttaattgggg
gttttggaaattgattggtacctttaatattaggagcacctgatatagcttttcctcgaa
taaataatttaagattttgattacttcccccatcattatttttattaattgtttcatcaa
tagtagaaataggagtaggtgctgggtgaaccgtttatccacctttagcaagattagaag
gacatgctggaaggtcagttgattttgctattttttcattacatttagctggggcatcat
caattataggtgctattaattttatttcaacaattattaatatacgtttttatggaataa
ctatggaaaaagttccactatttgtatgatcagttttgatcactgctgtattattacttc
tttcattaccagtattagctggggctattacaatattattaacagatcgaaattttaata
cttctttttttgacccttctgggggaggagatcctattttatttcagcatttg
>SMNKARA08926_Larinioides_cornutus_9y86E_48y53N_jv_A_Araneidae
ctttatatttaatttttggtgcttgagctgctatagttggaactgcaataagagtattaa
ttcggattgaattaggtcaacctggtagatttataggggatgatcaattatacaatgtta
ttgtaactgctcatgcttttgtaataattttttttatggttataccaattttaattgggg
gttttggaaattgattggtacctttaatattaggagcacctgatatagcttttcctcgaa
taaataatttaagattttgattacttcccccatcattatttttattaattgtttcatcaa
tagtagaaataggagtaggtgctgggtgaaccgtttatccacctttagcaagattagaag
gacatgctggaaggtcagttgattttgctattttttcattacatttagctggggcatcat
caattataggtgctattaattttatttcaacaattattaatatacgtttttatggaataa
ctatggaaaaagttccactatttgtatgatcagttttgatcactgctgtattattacttc
tttcattaccagtattagctggggctattacaatattattaacagatcgaaattttaata
cttctttttttgacccttctgggggaggagatcctattttatttcagcatttg
>SMNKARA08927_Larinioides_cornutus_9y86E_48y53N_jv_A_Araneidae
ctttatatttaatttttggtgcttgagctgctatagttggaactgcaataagagtattaa
ttcggattgaattaggtcaacctggtagatttataggagatgatcaattatataatgtta
ttgtaactgctcatgcttttgtaataattttttttatggttataccaattttaattgggg
gttttggaaattgattggtacctttaatattaggagcacctgatatagcttttcctcgaa
taaataatttaagattttgattacttcccccatcattatttttattaattgtttcatcaa
tagtagaaataggagtaggtgctgggtgaaccgtttatccacctttagcaagattagaag
gacatgctggaaggtcagttgattttgctattttttcattacatttagctggggcatcat
caattatgggtgctattaattttatttcaacaattattaatatacgtttttatggaataa
ctatggaaaaagttccactatttgtatgatcagttttgatcactgctgtattattacttc
tttcattaccagtattagctggggctattacaatattattaacagatcgaaattttaata
cttctttttttgacccttctgggggaggagatcctattttatttcagcatttg
>SMNKARA08928_Coelotes_terrestris_8y22E_48y55N_ad_m_A_Agelenidae
ctttgtatttaatttttggggcttggtctgctatagttggaacggctataagagtattga
ttcgaattgaattaggtcaatcagggagttttttaggtgatgatcatatatataatgtta
ttgttactgctcatgcttttgttataattttttttatagtaatgcctattttaattggag
gttttggtaattgattagtgcctttaatattaggtgctccagatatagcttttcctcgat
taaataatttaagattttgattattacctccttcattatttttgttatttatttcttcta
tagttgaaataggtgtaggggctggatgaacggtttatccgccattagcttctagtatag
gtcatgctggaagatctgttgattttgctattttttctttacatttagctggggcttctt
ctattttaggagcgattaattttatttctactatttttaatatacgatcatatggaatga
cttttgaaaaggttcctttatttgtttggtctgtgttgattactgttgtattattattat
tatctttacctgtattggctggtgctattacaatattgttaactgatcgaaattttaata
cttcattttttgatccagctggaggtggagatcctattttatttcaacattta
>SMNKARA08929_Coelotes_terrestris_8y22E_48y55N_ad_m_A_Agelenidae
ctttgtatttaatttttggggcttggtctgctatagttggaacggctataagagtattga
ttcgaattgaattaggtcaatcagggagttttttaggtgatgatcatatatataatgtta
ttgttactgctcatgcttttgttataattttttttatagtaatgcctattttaattggag
gttttggtaattgattagtgcctttaatattaggtgctccagatatagcttttcctcgat
taaataatttaagattttgattattacctccttcattatttttgttatttatttcttcta
tagttgaaataggtgtaggggctggatgaacggtttatccgccattagcttctagtatag
gtcatgctggaagatctgttgattttgctattttttctttacatttagctggggcttctt
ctattttaggagcgattaattttatttctactatttttaatatacgatcatatggaatga
cttttgaaaaggttcctttatttgtttggtctgtgttgattactgttgtattattattat
tatctttacctgtattggctggtgctattacaatattgttaactgatcgaaattttaata
cttcattttttgatccagctggaggtggagatcctattttatttcaacattta
>SMNKARA08930_Coelotes_terrestris_8y22E_48y55N_ad_m_A_Agelenidae
ctttgtatttaatttttggggcttggtctgctatagttggaacggctataagagtattga
ttcgaattgaattaggtcaatcagggagttttttaggtgatgatcatatatataatgtta
ttgttactgctcatgcttttgttataattttttttatagtaatgcctattttaattggag
gttttggtaattgattagtgcctttaatattaggtgctccagatatagcttttcctcgat
taaataatttaagattttgattattacctccttcattatttttgttatttatttcttcta
tagttgaaataggtgtaggggctggatgaacggtttatccgccattagcttctagtatag
gtcatgctggaagatctgttgattttgctattttttctttacatttagctggggcttctt
ctattttaggagcgattaattttatttctactatttttaatatacgatcatatggaatga
cttttgaaaaggttcctttatttgtttggtctgtgttgattactgttgtattattattat
tatctttacctgtattggctggtgctattacaatattgttaactgatcgaaattttaata
cttcattttttgatccagctggaggtggagatcctattttatttcaacattta
>SMNKARA08931_Callobius_claustrarius_8y22E_48y55N_ad_f_A_Amaurobiidae
ttttatatttaatttttggtgtttgatcagctatagttggtatatctataagagttttaa
ttcgagttgaattagggcaatcaggtagatttttaggaaatgatcatttatataatgtaa
ttgttacagcccatgcttttgttataattttttttatagtaatacctattataattgggg
gatttggaaattgattggttcctttaatattaggggctccagatatagcttttcctcgaa
taaataatttaagattttgattattgcctccttctttaatattattacttatttcttcta
tagttgagataggagttggagctggatgaactatttatcctccattggcttctgatatag
ggcatcctggaaattctgtagattttactattttttctttacatttagctggggtatctt
ctattttaggagctattaattttatttctactattattaatatacgttctattggtatga
aaatggaaaaagtacctttatttgtttgatctattttaattacagttattttattattat
tatctttacctgtattagcaggtgctattactatattgttgacagatcgaaattttaata
cttctttttttgatcctgctggaggtggggatcctattttatttcaacattta
>SMNKARA08932_Micaria_pulicaria_8y22E_48y55N_ad_m_A_Gnaphosidae
cattatatttgatttttggagcttgggctgctatagtaggaacagcaatgagagtattaa
ttcgaatggaattagggcaatctggtagatttttaggggatgatcatttatataatgtta
ttgtaacggctcatgcttttgttatgattttttttatagttatgcctattataattggtg
gttttggtaattgattggtgcctttaatgttaggggcacctgatatggcttttcctcgta
taaataatttaagtttctgattattacctccttcattaattttattatttatttcttcta
tagtggagatgggtgtaggtgctggttgaactgtttatcctcctcttgcttctagtatag
ggcatgccggtagtgctatagattttgctattttttctttacatttagctggagcttctt
ctattatgggggctattaattttatttctactattattaatatacgattaaatggcataa
gcatagaaaaggttcctttatttgtgtggtcggtatttattactgctattttattattat
tatcattgcctgtattagcaggtgctattacaatattgttaactgatcgaaattttaata
cttctttttttgatcctgcaggaggaggagatccaatcttatttcaacattta
>SMNKARA08933_Gongylidiellum_latebricola_8y22E_48y55N_ad_m_A_Linyphiidae
gtttatattttgtttttggggcttgagctgctatggtagggacagctataagagttttaa
ttcgagttgagttagggcaagttggaagattattaggggatgatcagttatataatgtca
ttgtaacagctcatgcttttgttataattttttttatagtgatacctattttgattgggg
ggtttggtaattgattggttccaataatattaggggctccggatatagcttttcctcgga
taaataatttaagattttgattgttacccccttctttatttttattgtttatttcaagaa
tggatgagataggggtaggagctggatgaacagtttatccccctcttgcttctttggagg
ggcattcggggagatctgttgattttgctattttttccttacacttagctggagcttctt
ctattataggagctattaattttatttcttcgatcttgaatatgcgggggtgggggataa
ctatagagaggatcccattgtttgtttggtcggtttttattacagctattttattgttat
tatctcttcctgtattagcgggagctatcactatattattaacggatcggaattttaata
cgtcattttttgatccttcggggggtggggatcctgtattatttcagcattta
>SMNKARA08934_Palliduphantes_pallidus_8y22E_48y55N_ad_m_A_Linyphiidae
cattatattttatttttggagcttgagctgctatagtgggaactgctataagagtgttaa
ttcgaattgaattgggacaaacgggaagaatattaggggatgatcaactttataatgtta
ttgtgacagcgcatgcttttgttataattttttttatggtgatacctattttaattggag
ggtttggaaattggcttgtacctttgatgcttggagctcccgatatagcatttcctcgaa
taaataacttgagattttggttacttcctccttcattgctattattatttatttctagaa
tggtagagataggggtaggggctggatgaactgtttatcctcctttggcttctttagagg
gacatgcagggagttctgtggattttgctattttttctttgcatttagctggggcttctt
caattataggggctattaattttatttctacaattattaatatgcggggaagaggagtta
caatagataaagtccctttatttgtttgatctgtattaattactgctgtgttattattat
tatctttgccagtgttggcaggcgctattactatgttattaactgatcgaaattttaata
catctttttttgatcctgcgggaggtggggatcctgttttgtttcagcatctt
>SMNKARA08935_Agyneta_rurestris_8y22E_48y55N_ad_f_A_Linyphiidae
gtttatattttatttttggagcttgagcggctatagttggaacagcgataagagtattga
ttcgaattgaattagggcaaactggtagattattaggggatgatcaattgtataatgtta
ttgtgacagctcatgcttttgtgataattttttttatagttatacctattttaattggtg
gatttggaaattggttggttcctttaatgttaggggctcctgatatggcatttcctcgta
taaataatttgagattttggctattacctccttctttatttttactttttatttctagaa
tagatgagataggagtaggtactgggtgaactgtttatcctcctattgcttctttagaag
gtcatgctggtagatctgttgattttgctattttttctttacatttagctggtgcttcat
caattatgggggctattaattttatttctactattttaaatatacgtggttatggaataa
ctatagaaaaggttcctttatttgtttgatctgtgcttattacagctgttttacttttat
tgtctttacctgtgttagctggggctattactatattattaactgatcgtaattttaata
catcattttttgatccatctggtggaggggaccctgttttatttcaacatttg
>SMNKARA08936_Agyneta_rurestris_8y22E_48y55N_ad_m_A_Linyphiidae
gtttatattttatttttggagcttgagcggctatagttggaacagcgataagagtattga
ttcgaattgaattagggcaaactggtagattattaggggatgatcaattgtataatgtta
ttgtgacagctcatgcttttgtgataattttttttatagttatacctattttaattggtg
gatttggaaattggttggttcctttaatgttaggggctcctgatatggcatttcctcgta
taaataatttgagattttggctattacctccttctttatttttactttttatttctagaa
tagatgagataggagtaggtactgggtgaactgtttatcctcctattgcttctttagaag
gtcatgctggtagatctgttgattttgctattttttctttacatttagctggtgcttcat
caattatgggggctattaattttatttctactattttaaatatacgtggttatggaataa
ctatagaaaaggttcctttatttgtttgatctgtgcttattacagctgttttacttttat
tgtctttacctgtgttagctggggctattactatattattaactgatcgtaattttaata
catcattttttgatccatctggtggaggggaccctgttttatttcaacatttg
>SMNKARA08937_Agyneta_rurestris_8y22E_48y55N_ad_m_A_Linyphiidae
gtttatattttatttttggagcttgagcggctatagttggaacagcgataagagtattga
ttcgaattgaattagggcaaactggtagattattaggggatgatcaattgtataatgtta
ttgtgacagctcatgcttttgtgataattttttttatagttatacctattttaattggtg
gatttggaaattggttggttcctttaatgttaggggctcctgatatggcatttcctcgta
taaataatttgagattttggctattacctccttctttatttttactttttatttctagaa
tagatgagataggagtaggtactgggtgaactgtttatcctcctattgcttctttagaag
gtcatgctggtagatctgttgattttgctattttttctttacatttagctggtgcttcat
caattatgggggctattaattttatttctactattttaaatatacgtggttatggaataa
ctatagaaaaggttcctttatttgtttgatctgtgcttattacagctgttttacttttat
tgtctttacctgtgttagctggggctattactatattattaactgatcgtaattttaata
catcattttttgatccatctggtggaggggaccctgttttatttcaacatttg
>SMNKARA08938_Pocadicnemis_pumila_8y22E_48y55N_ad_f_A_Linyphiidae
gtttatattttgtttttggggcttgagctgctatagtaggtacagcaataagagtgttga
ttcgaattgagttgggtcagactggtagtttattaggagatgaccagttatataatgtta
ttgttactgctcatgcttttgttataattttttttatagttatacctattttaattgggg
gatttgggaattgattagttccattaatgttgggggctccagatatagcttttccgcgta
taaataatttaagattttgattgcttcctccttctttattattattatttatttctagaa
tggatgaaataggggtaggagcagggtgaactgtttatccccctcttgcctctttagagg
ggcattctgggagttcagtagattttgctattttttctttacatttagctggggcatcat
ctattataggagctattaattttatttctactattttaaatatgcgagggtatgggataa
ctatagaaaaggttcctttgtttgtttgatctgtattaattacagctgtattactgttat
tgtctttacctgtattggcaggagctattactatacttttaacagttcgaaattttaata
cttctttttttgacccctcgggggggggagacccggttttgtttcagcattta
>SMNKARA08939_Walckenaeria_alticeps_8y22E_48y55N_ad_f_A_Linyphiidae
gtttatattttatatttggagcttgggctgctatagtaggaacagcaataagagtattaa
ttcgaattgaattagggcaaggtggtagtttgttaggggacgatcagttatataatgtta
ttgttactgctcatgcttttgttataattttttttatagtaatacctattttaattggag
ggtttggtaattggttagttcctttgatattaggagctccggatatggcatttcctcgta
taaataatttaagattttgattattaccaccttctttattattattatttatttctagta
tggatgagatgggggtaggagcagggtgaactgtttatcctccacttgcttctttggaag
ggcattctggtagatcggtagattttgctattttttctttacatttagctggggcttctt
caattataggagctattaattttatttctactatttttaatatgcgggggtatggtataa
ctatagaaagggttcctttatttgtttggtctgttttgattacagctgtattattattat
tgtctttacctgtattagcaggtgctattactatacttttaacagattggaaatttaata
cgtcattttttgatcctgcggggggaggggatcctgttttatttcaacattta
>SMNKARA08940_Palliduphantes_pallidus_8y22E_48y55N_ad_m_A_Linyphiidae
cattatattttatttttggagcttgagctgctatagtgggaactgctataagagtgttaa
ttcgaattgaattgggacaaacgggaagaatattaggggatgatcaactttataatgtta
ttgtgacagcgcatgcttttgttataattttttttatggtgatacctattttaattggag
ggtttggaaattggcttgtacctttgatgcttggagctcccgatatagcatttcctcgaa
taaataacttgagattttggttacttcctccttcattgctattattatttatttctagaa
tggtagagataggggtaggggctgggtgaactgtttatcctcctttggcttctttagagg
gacatgcagggagttctgtggattttgctattttttctttgcatttagctggggcttctt
caattataggggctattaattttatttctacaattattaatatgcggggaagaggagtta
caatagataaagtccctttatttgtttgatctgtattaattactgctgtgttattattat
tatctttgccagtgttggcaggcgctattactatgttattaactgatcgaaattttaata
catctttttttgatcctgcgggaggtggggatcctgttttgtttcagcatctt
>SMNKARA08941_Tenuiphantes_cristatus_8y22E_48y55N_ad_f_A_Linyphiidae
ctttatattttatttttggagcttgagccgctatagtgggaactgcaataagagtattaa
ttcgaatcgagttaggacaaactggaagaatgttgggagatgaccaattatataatgtaa
ttgttactgctcatgcttttgtgataattttttttatggttatacctattttaattggag
gatttggaaattggttagttcctttgatactaggggctcctgatatagcttttccacgaa
taaataatcttagattttgattacttcctccttctttattactattatttatttcaagaa
tagttgagataggggttggggcaggatgaactgtttatcctcctcttgcttctttagaag
gacatgccgggagttctgtagattttgctattttttctcttcacttagctggggcatctt
caattataggagctattaattttatctccactattgtaaatatgcgaggttatggagttt
caatagaaaaggttcctttatttgtgtgatctgttttaattactgctgtgttattgttgt
tatctcttcctgtattagcaggagctattacaatgttattaacnnnnnnnnnnnnnnnnn
nnnnnnnnnnnnnnnnnnnnnnnnnnnnnnnnnnnnnnnnnnnnnnnnnnnnn
>SMNKARA08942_Tenuiphantes_cristatus_8y22E_48y55N_ad_f_A_Linyphiidae
ctttatattttatttttggagcttgagccgctatagtgggaactgcaataagagtattaa
ttcgaatcgagttaggacaaactggaagaatgttgggagatgaccaattatataatgtaa
ttgttactgctcatgcttttgtgataattttttttatggttatacctattttaattggag
gatttggaaattggttagttcctttgatactaggggctcctgatatagcttttccacgaa
taaataatcttagattttgattacttcctccttctttattactattatttatttcaagaa
tagttgagataggggttggggcaggatgaactgtttatcctcctcttgcttctttagaag
gacatgccgggagttctgtagattttgctattttttctcttcacttagctggggcatctt
caattataggagctattaattttatctccactattgtaaatatgcgaggttatggagttt
caatagaaaaggttcctttatttgtgtgatctgttttaattactgctgtgttattgttgt
tatctcttcctgtattagcaggagctattacaatgttattaactgatcgaaattttaata
cttcttttttcgaccctgcagggggaggggatcctgtattgtttcagcattta
>SMNKARA08944_Tenuiphantes_mengei_8y22E_48y55N_ad_f_A_Linyphiidae
ctctatattttatttttggagcgtgagctgctatagtaggaactgctataagagtgttaa
ttcgaattgagttggggcaaactggaagaatattgggggatgatcagttatataatgtta
ttgttactgcacatgcttttgttataattttctttatagttataccgattttaattggtg
gatttggaaattggttagttcctttaatgcttggggctccggatatagcttttcctcgaa
taaataatttaagattttgacttttacctccttctttactgttattatttatttcaagta
tagttgagataggggttggagcaggatgaacagtgtatcctcctcttgcttctttagaag
ggcatgcaggaagttcagttgattttgctattttttctcttcatttagctggggcttctt
ctattataggtgcaattaattttatttccactattattaacatacgtgggtatggtgttt
caatggaaaaggttccgttgtttgtgtgatctgttttaattactgctgttcttttattgt
tatctttgcctgttttagcaggagctattactatacttttaactgatcgaaattttaata
cttcgttttttgaccctgcaggagggggagatccagtattatttcaacactta
>SMNKARA08945_Cnephalocotes_obscurus_8y22E_48y55N_ad_m_A_Linyphiidae
gcttatattttatctttggggcttgggctgctatggtaggaacagcaataagtgtattaa
ttcgggttgagttaggccaaactggaagattactaggggatgatcagctatataatgtta
ttgtcactgctcatgcttttgttataattttttttatagttatacctattttgattggtg
gttttgggaattgactggtccctttgatattgggggctcctgatatagctttcccgcgca
taaataatttgagattttgattgttacccccatctttgtttatgttgtttatctctagaa
tggatgagataggggttggggccggatgaactatttatcctcctcttgcctctttagagg
gacatgccggtagttcagtggattttgctattttttctttacacttagccggggcatctt
ctattatgggggctattaattttatttctactattataaatatacgcggatgtggaataa
ctatagagaaggttcctttatttgtatgatctgttttaatcacagctgtattattattat
tatctttaccagttttggcgggggctattacaatgcttttaacagatcgaaattttaata
cgtctttttttgacccggctggggggggggatcctgttttatttcaacatttg
>SMNKARA08946_Ceratinella_brevis_8y22E_48y55N_ad_m_A_Linyphiidae
gtttatattttatttttggagcttgagctgctatagtagggacagcaataagagtattga
ttcgtgttgagttaggacaaattggaagattattaggggatgatcagttgtataatgtta
ttgttacggctcatgcttttgttataattttttttatagtgatacctattttaattggtg
gttttgggaattggttggttcctttaatgttgggggcacctgatatagcttttcctcgaa
taaataatttaagattttgattattacctccttctttattattattatttatttctagaa
tagatgagatgggggtaggagcggggtgaactatttatcctcctcttgcttctttagaag
ggcattctggaagatcagtagattttgctattttttctttacatttagcaggagcgtcat
caattataggtgctattaattttatttctactattttaaacatacgggggtatgggataa
caatagaaaaagttcctttatttgtttgatctgttttaattacggctgttttattacttt
tgtctttaccagtattagctggggcgattactatgcttttaacagtatcgaattttaata
catcattttttgatccagcgggtggaggggatccggttttatttcaacattta
>SMNKARA08947_Diplocephalus_latifrons_8y22E_48y55N_ad_f_A_Linyphiidae
nnnnnnnnnnnnnnnnnnnnnnnnnnnnnnnnntagtagggacagcaataagagtattaa
ttcgaattgagttaggtcaaactggtagattgttaggtgatgatcagttatataatgtta
tcgtaactgctcatgcatttgttataattttttttatagtgatacctattttaattgggg
gatttggaaattggttagttcctttaatgttaggggctcctgatatagcttttcctcgaa
taaataatttaagtttttggttattacccccctctttgtttttattgtttatttctagaa
tagatgaaataggagttggggcgggatgaacagtgtatcctcctcttgcctctttagaag
ggcatcctggaagatcggtagattttgctattttttctctacacttagccggggcatcgt
caattatgggggctattaactttatctctactattttaaacatacgtgggtatggaataa
ctatagataaggtccctttatttgtttgatcggttttgattactgctgtcttattacttt
tatccttaccagttttagcaggagctattactatgcttttgacagatcgtaattttaata
cttctttcttttacccttctggcgggggagatcctgatttatttcaacatttg
>SMNKARA08949_Agyneta_rurestris_8y22E_48y55N_ad_m_A_Linyphiidae
gtttatattttatttttggagcttgagcggctatagttggaacagcgataagagtattaa
ttcgaattgaattagggcaaactggtagattattaggggatgatcaattgtataatgtta
ttgtgacagctcatgcttttgtgataattttttttatagttataccaattttaattggtg
gatttgggaattggttggttcctttaatgttaggggctccggatatggcatttcctcgta
taaataatttgagattttggttattacctccttctttatttttactttttatttctagaa
tagatgagataggagtaggtactgggtgaactgtttatcctcctattgcttctttagaag
gccatgctggtagatctgttgattttgctattttttctttacatttagctggtgcttcat
caattatgggggctattaattttatttctactattttaaatatacgtggttatgggataa
ctatagaaaaggttcctttatttgtttgatctgtgcttattacagctgttttacttttat
tgtctttacctgtgttagctggggctattactatattattaactgatcgtaattttaata
catcattttttgatccatctggtggaggggaccctgttttatttcaacatttg
>SMNKARA08950_Agyneta_rurestris_8y22E_48y55N_ad_f_A_Linyphiidae
gtttatattttatttttggagcttgagcggctatagttggaacagcgataagagtattga
ttcgaattgaattagggcaaactggtagattattaggggatgatcaattgtataatgtta
ttgtgacagctcatgcttttgtgataattttttttatagttatacctattttaattggtg
gatttggaaattggttggttcctttaatgttaggggctcctgatatggcatttcctcgta
taaataatttgagattttggctattacctccttctttatttttactttttatttctagaa
tagatgagataggagtaggtactgggtgaactgtttatcctcctattgcttctttagaag
gtcatgctggtagatctgttgattttgctattttttctttacatttagctggtgcttcat
caattatgggggctattaattttatttctactattttaaatatacgtggttatggaataa
ctatagaaaaggttcctttatttgtttgatctgtgcttattacagctgttttacttttat
tgtctttacctgtgttagctggggctattactatattattaactgatcgtaattttaata
catcattttttgatccatctggtggaggggaccctgttttatttcaacatttg
>SMNKARA08951_Agyneta_rurestris_8y22E_48y55N_ad_f_A_Linyphiidae
gtttatattttatttttggagcttgagcggctatagttggaacagcgataagagtattga
ttcgaattgaattagggcaaactggtagattattaggggatgatcaattgtataatgtta
ttgtgacagctcatgcttttgtgataattttttttatagttatacctattttaattggtg
gatttggaaattggttggttcctttaatgttaggggctcctgatatggcatttcctcgta
taaataatttgagattttggctattacctccttctttatttttactttttatttctagaa
tagatgagataggagtaggtactgggtgaactgtttatccccctattgcttctttagaag
gtcatgctggtagatctgttgattttgctattttttctttacatttagctggtgcttcat
caattatgggggctattaattttatttctactattttaaatatacgtggttatggaataa
ctatagaaaaggttcctttatttgtttgatctgtgcttattacagctgttttacttttat
tgtctttacctgtgttagctggggctattactatattattaactgatcgtaattttaata
catcattttttgatccatctggtggaggggaccctgttttatttcaacatttg
>SMNKARA08952_Agyneta_rurestris_8y22E_48y55N_ad_f_A_Linyphiidae
gtttatattttatttttggagcttgagcggctatagttggaacagcgataagagtattaa
ttcgaattgaattagggcaaactggtagattattaggggatgatcaattgtataatgtta
ttgtgacagctcatgcttttgtgataattttttttatagttataccaattttaattggtg
gatttgggaattggctggttcctttaatgttaggggctccggatatggcatttcctcgta
taaataatttgagattttggttattacctccttctttatttttactttttatttctagaa
tagatgagataggagtaggtactgggtgaactgtttatcctcctattgcttctttagaag
gccatgctggtagatctgttgattttgctattttttctttacatttagcaggtgcttcat
caattatgggggctattaattttatttctactattttaaatatacgtggttatgggataa
ctatagaaaaggttcctttatttgtttgatctgtgcttattacagctgttttacttttat
tgtctttacctgtgttagctggggctattactatattattaactgatcgtaattttaata
catcattttttgatccatctggtggaggggaccctgttttatttcaacatttg
>SMNKARA08953_Micrargus_herbigradus_8y22E_48y55N_ad_m_A_Linyphiidae
gtttatactttatttttggggcttgagctgctatagtgggtacaggaataagagttttaa
ttcgtattgaattaggtcagacgggaagattgttaggggatgatcacttatataatgtta
ttgttacagcgcatgcttttgttataattttttttatggtgataccaattttaattggag
gatttggaaattggttagtgccattaatattaggggcgcctgatatagcttttcctcgta
tgaataatttgagattttgattattaccaccttctttatttttattatttatttctagaa
tagacgaaatgggcgtaggagcaggatggactgtgtatcctcctcttgcttctttagagg
gtcattctggtagttcagtagattttgctattttttctttacatttggctggtgcatctt
caattataggggctattaattttatttctactatccttaatatgcggggttatggaatat
ctatagaaaaagttcctttatttgtatggtctgtgttaattacagctgtgcttttattgt
tatctttacctgttttagcaggggctattaccatgcttttaacagatcgtaattttaaca
catcattttttgacccctctggagggggggatcctgttttatttcaacactta
>SMNKARA08955_Micrargus_herbigradus_8y22E_48y55N_ad_f_A_Linyphiidae
gtttatactttatttttggggcttgagctgctatagtgggtacaggaataagagttttaa
ttcgtattgaattaggtcagacgggaagattgttaggggatgatcaattatataatgtta
ttgttacagcacatgcttttgttataattttttttatggtgataccaattttaattggag
gatttggaaattggttagtgccattaatattaggggcgcctgatatagcttttcctcgta
tgaataatttgagattttgattattaccaccttctttatttttattatttatttctagaa
tagaagaaatgggcgtaggagcaggatggactgtgtatccccctcttgcttctttagaag
ggcattctggtagttcagtagattttgctattttttctttacatttggcgggtgcatctt
caattataggggctattaattttatttctactatccttaatatgcggggttatgggataa
ctatagaaaaagttcctttatttgtatggtctgtgttaattacagctgtgcttttattgt
tatctctacctgttttagcaggggctattaccatgcttttaacagatcgtaattttaaca
catcattttttgacccctctggagggggggatcctgttttatttcaacactta
>SMNKARA08957_Micrargus_apertus_8y22E_48y55N_ad_f_A_Linyphiidae
gtttatattttatttttggggcttgagctgctatagtgggtacaggaataagagttttaa
ttcgtattgagttaggtcagacgggaagattgttaggggatgatcagttatataatgtta
ttgttacagcgcatgcttttgttataattttttttatagtaataccaattttaattgggg
gttttggaaattggttagtgccattaatattaggggcacctgatatagcttttcctcgta
tgaataatttgagattttggttattaccaccttctttatttttattatttatttctagaa
tggacgaaatgggtgtaggagcaggatggactgtgtatcctcctcttgcttctttagaag
ggcattctggcagttcagtagattttgctattttttctctacatttggctggggcatctt
caattataggagctattaattttatttctactattcttaatatgcggggttatggaataa
ctatagaaaaagttcctttatttgtatgatctgtgttaattacagctgtgcttttattgt
tatctttacctgttttagcaggggctattactatacttttaacagatcgtaattttaata
catcattttttgacccttctgggggtggggatcctgttttatttcaacattta
>SMNKARA08958_Micrargus_herbigradus_8y22E_48y55N_ad_m_A_Linyphiidae
gtttatactttatttttggggcttgagctgctatagtgggtacaggaataagagttttaa
ttcgtattgaattaggtcagacgggaagattgttaggggatgatcaattatataatgtta
ttgttacagcgcatgcttttgttataattttttttatggtgataccaattttaattggag
gatttggaaattggttagtgccattaatattaggggcgcctgatatagcttttcctcgta
tgaataatttgagattttgattattaccaccttctttatttttattatttatttctagaa
tagacgaaatgggcgtaggagcaggatggactgtgtatcctcctcttgcttctttagagg
gtcattctggtagttcagtagattttgctattttttctttacatttggctggtgcatctt
caattataggggctattaattttatttctactatccttaatatgcggggttatggaatat
ctatagaaaaagttcctttatttgtatggtctgtgttaattacagctgtgcttttattgt
tatctttacctgttttagcaggggctattaccatgcttttaacagatcgtaattttaaca
catcattttttgacccctctggagggggggatcctgttttatttcaacactta
>SMNKARA08962_Walckenaeria_dysderoides_8y22E_48y55N_ad_m_A_Linyphiidae
gcttatattttatttttggggcttgggctgctatggtagggacagcaataagagtattga
ttcgaattgagttagggcaaactggtagcttattaggggatgatcaactatataacgtta
ttgttactgctcatgcttttgttataattttctttatagtaatacctattttgattggtg
gatttggaaattggttaatccctttaatattaggggctccagatatagcttttcctcgta
taaataatttaagattttggttgttacccccctctttattattattatttatttctagta
tagatgagataggggtaggggcaggatgaactatttatcctcctcttgcttctttggagg
ggcactctggtagatcggtggattttgctattttttctttacacttagctggagcttcat
caattatgggggctattaattttatttctactatttttaatatacggggatgtggtataa
ctatagaaaaggttcctttatttgtttgatctgtgttgattacggctgtgttgctattat
tatctttaccggttttagcaggggctattactatacttttaacagatcgtaattttaata
cgtcattttttgatccttctgggggaggggatcctgttttgtttcaacattta
>SMNKARA08963_Walckenaeria_dysderoides_8y22E_48y55N_ad_m_A_Linyphiidae
gcttatattttatttttggggcttgggctgctatggtagggacagcaataagagtattga
ttcgaattgagttagggcaaactggtagcttattaggggatgatcaactatataacgtta
ttgttactgctcatgcttttgttataattttctttatagtaatacctattttgattggtg
gatttggaaattggttaatccctttaatattaggggctccagatatagcttttcctcgta
taaataatttaagattttggttgttacccccctctttattattattatttatttctagta
tagatgagataggggtaggggcaggatgaactatttatcctcctcttgcttctttggagg
ggcactctggtagatcggtggattttgctattttttctttacacttagctggagcttcat
caattatgggggctattaattttatttctactatttttaatatacggggatgtggtataa
ctatagaaaaggttcctttatttgtttgatctgtgttaattacggctgtgttgctattat
tatctttaccggttttagcaggggctattactatacttttaacagatcgtaattttaata
cgtcattttttgatccttctgggggaggggatcctgttttgtttcaacattta
>SMNKARA08964_Walckenaeria_dysderoides_8y22E_48y55N_ad_m_A_Linyphiidae
gcttatattttatttttggggcttgggctgctatggtagggacagcaataagagtattga
ttcgaattgagttagggcaaactggtagcttattaggggatgatcaactatataacgtta
ttgttactgctcatgcttttgttataattttctttatagtaatacctattttgattggtg
gatttggaaattggttaatccctttaatattaggggctccagatatagcttttcctcgta
taaataatttaagattttggttgttacccccctctttattattattatttatttctagta
tagatgagataggggtaggggcaggatgaactatttatcctcctcttgcttctttggagg
ggcactctggtagatcggtggattttgctattttttctttacacttagctggagcttcat
caattatgggggctattaattttatttctactatttttaatatacggggatgtggtataa
ctatagaaaaggttcctttatttgtttgatctgtgttgattacggctgtgttgctattat
tatctttaccggttttagcaggggctattactatacttttaacagatcgtaattttaata
cgtcattttttgatccttctgggggaggggatcctgttttgtttcaacattta
>SMNKARA08965_Euophrys_frontalis_8y22E_48y55N_ad_m_A_Salticidae
ctttatatctaatttttggggtttgatcggcaatggtaggtacagcaataagagtattga
ttcgaatagaattaggtcagactggtaattttataggagatgaccatttgtataatgtga
ttgttacagctcatgcttttgttatgattttttttatagttatacctattataattggtg
gttttggtaattggttagtacctttaatattaggtgctcctgatatggcttttcctcgta
tgaataatttgagtttttgattattgcctccttctttaatattattgtttatttcatcta
tggctgaaatgggtgtgggagctgggtgaacagtatatccaccgttggcttctattgtag
gacataatggaagttctgtagattttgctattttttctttacatttagctggtgcttctt
ctattataggggctatcaattttatttcaactgttattaatatacgatctattggtatgt
ccttagataatatccctttatttgtttggtctgtagtgattacagcggtattattattgt
tatctctacctgtgttagctggtgctattactatattgttaacagatcgtaattttaata
cttctttttttgatcctgcagggggaggggatcctattttatttcaacattta
>SMNKARA08966_Euophrys_frontalis_8y22E_48y55N_ad_m_A_Salticidae
ctttatatttaatttttggggcttgatcagcaatggtaggtacagcaatgagagtattga
ttcgaatggaattaggtcagactggtaattttataggagatgaccatttgtataatgtga
ttgttacagcccatgcttttgttatgattttttttatagttatacctattataattgggg
gttttggtaactggttagtacctttaatattaggtgctcctgatatggcttttcctcgta
tgaataatttgagtttttgattgctgcccccttctttaatattgttgtttatctcatcta
tggctgaaatgggtgtgggagctgggtgaacagtatacccaccgttggcttctattgtag
gacataatgggagttctgtagattttgctattttttctttacatttagctggtgcttctt
ctattataggggctatcaattttatttcaactgttattaatatacgatctattggtatat
ccttagataagatccctttatttgtttggtctgtagtgattacagcggtattattattgt
tatctctacccgtgttagctggtgctattactatattattgacagatcgtaattttaata
cttctttttttgatcctgcggggggaggggaccctattttatttcaacattta
>SMNKARA08967_Euophrys_frontalis_8y22E_48y55N_ad_m_A_Salticidae
ctttatatttaatttttggggcttgatcagcaatggtaggtacagcaatgagagtattga
ttcgaatggaattaggtcagactggtaattttataggagatgaccatttgtataatgtga
ttgttacagcccatgcttttgttatgattttttttatagttatacctattataattgggg
gttttggtaactggttagtacctttaatattaggtgctcctgatatggcttttcctcgta
tgaataatttgagtttttgattgctgcccccttctttaatattgttgtttatctcatcta
tggctgaaatgggtgtgggagctgggtgaacagtatacccaccgttggcttctattgtag
gacataatgggagttctgtagattttgctattttttctttacatttagctggtgcttctt
ctattataggggctatcaattttatttcaactgttattaatatacgatctattggtatat
ccttagataagatccctttatttgtttggtctgtagtgattacagcggtattattattgt
tatctctacccgtgttagctggtgctattactatattattgacagatcgtaattttaata
cttctttttttgatcctgcggggggaggggaccctattttatttcaacattta
>SMNKARA08971_Drassodes_cupreus_8y22E_48y55N_ad_m_A_Gnaphosidae
ctttatattttttatttggattatgatcttcaatagtaggaacagctataagagtggtga
ttcgtatagaattaggacaatctggtagattattaggagatgatcatttatataatgtaa
ttgttacagcacatgcttttgttataattttttttatagtaatacctattttgattggag
gctttggaaattgattagttcctttgatattaggtgctcctgatatagcttttccacgta
taaataatttgagtttttgattattaccaccttcgttagttctattatttatttcttcta
tagctgaaataggtgtaggagctggttgaacagtttatcctccattggcttctaatattg
gacatgctggaagtgctatagattttgctattttttcattacatttggctggagcttctt
ctattataggagctgttaattttatttctactattgtgaatatacgaatattaggaatga
gaatagagaaggtttcattatttgtatgatctgtattaattactgctgtattgttattat
tatctttaccagttttagctggagcaattactatattattaactgatcgtaattttaata
cttcatttttcgatccagctggaggtggtgatccaattttatttcaacattta
>SMNKARA08972_Haplodrassus_signifer_8y22E_48y55N_ad_m_A_Gnaphosidae
ctttatatttactttttggatcttgagctgctatagtaggaactgcaataagagtattaa
ttcggatggaattaggacagtcaggaagatttattggggatgatcatttatataatgtaa
ttgttactgctcatgcatttgttataattttttttatagtaatacctattataattggtg
gttttggtaattggttagttcctttaatgttaggagctccagatatagcttttcctcgaa
taaataatttaagtttttgattattacccccatctttagttttattatttgtttcttcta
tagttgaaatgggagttggagctgggtgaactgtatatcctcctttagcttcttctatag
gacatagtggtagagctatggattttgctattttttctttacatttggctggtgcttctt
ctattataggggctattaattttatttctactgtaattaatatgcgttctttaggtataa
gtatagagaaagtacctttatttgtttgatctgtttttattacagcggtattattattat
tatccttacctgtattggcaggagctattactatattattgacggatcgtaattttaata
cttctttttttgatccagctgggggaggagatcctattttatttcaacattta
>SMNKARA08973_Haplodrassus_signifer_8y22E_48y55N_ad_f_A_Gnaphosidae
ctttatatttactttttggatcttgagctgctatagtaggaactgcaataagagtattaa
ttcgaatggaattaggacaatcagggagatttattggggatgatcatttatataatgtaa
ttgttactgctcatgcatttgttataattttttttatagtaatacctattatgattggtg
gttttggaaattggttagttcctttaatgttaggagccccagatatagcttttcctcgaa
taaataatttaagtttttgattattacctccatctttagttttattatttgtttcttcta
tagttgaaatgggagttggagctggatgaactgtatatcctcccttagcttcttctatag
gacatagtggtagagctatagattttgctattttttctttgcatttggctggtgcttctt
ctattataggggctattaattttatttctactgtaattaatatgcgttctttaggtataa
gtatagagagggtacctttatttgtttgatctgtttttattacggcggtgttattattat
tatccttacctgtattggcaggagctattactatattgttaacggatcgtaattttaata
cttctttttttgacccagctggaggaggagatcctattttatttcaacattta
>SMNKARA08974_Robertus_lividus_8y22E_48y55N_ad_m_A_Theridiidae
ctttatatttgatttttggggtgtgatcagctatagttggtacagctatgagtgtcctaa
ttcgggtagaattaggacaatctggaagattgttaggggatgatcaattatataatgtaa
ttgtaactgctcatgcttttgtaataattttttttatagtaatacctattataattgggg
ggtttggaaattgattagttcctttaatgttaggggctccagatatagctttccctcgaa
taaataatttaagattttgattattacctccttctttatttctattatttatttcttcta
tagttgaaataggagtaggtgctgggtgaacaatttatcctcctttatcttctttagagg
gtcattcaggaagatcagttgattttgcgattttttctcttcatcttgcaggtgcttctt
ctattataggggctgtaaattttatttctactattttaaatatacgtgtgtatggaatat
ctatagaaaaagttactttatttgtatgatcagttttaattactgctattcttttattat
tatcgttacctgttttagcaggagctattactatgttattaactgatcgaaattttaata
cttctttttttgatccttctggaggaggagatccaattttatttcaacattta
>SMNKARA08975_Alopecosa_pulverulenta_8y22E_48y55N_ad_m_A_Lycosidae
ctttatatttaatattaggtgtttgatcggctataataggaactgctatatcagtattaa
ttcgaatggaattaggtaatcctggaagtttattaggagatgatcatttatataatgtta
tagttactgctcatgcttttgtaatgattttttttatagtaataccaattcttattggtg
ggtttggtaattgattagttcctttaatattaggagcccctgatatatcatttcctcgta
taaataatctttctttttgattattacctccttctttatttttgttatgtatatcttcta
tagtagaaataggggtaggagctggttgaactgtttatcctcctttggcatcgagaatag
gtcatacaggaagttctatggattttgctattttttctcttcatttagctggggcttctt
ctattataggagcagtaaattttatttctactattattaatatacgaatattaggtatat
caatagagaaagttcctttatttgtttgatcagttttaattacagcagttttattattac
tttccttacctgttttagcaggtgctattactatattattaactgatcgaaattttaata
cttctttttttgatccagcaggtggaggggatcctattttatttcaacattta
>SMNKARA08976_Alopecosa_pulverulenta_8y22E_48y55N_ad_m_A_Lycosidae
ctttatatttaatattaggtgtttgatcggctataataggaactgctatatcagtattaa
ttcgaatggaattaggtaatcctggaagtttattaggagatgatcatttatataatgtta
tagttactgctcatgcttttgtaatgattttttttatagtaataccaattcttattggtg
ggtttggtaattgattagttcctttaatattaggagcccctgatatatcatttcctcgta
taaataatctttctttttgattattacctccttctttatttttgttatgtatatcttcta
tagtagaaataggggtaggagctggttgaactgtttatcctcctttggcatcgagaatag
gtcatacaggaagttctatggattttgctattttttctcttcatttagctggggcttctt
ctattataggagcagtaaattttatttctactattattaatatacgaatattaggtatat
caatagagaaagttcctttatttgtttgatcagttttaattacagcagttttattattac
tttctttacctgttttagcaggtgctattactatattattaactgatcgaaattttaata
cttctttttttgatccagcaggtggaggggatcctattttatttcaacattta
>SMNKARA08977_Alopecosa_pulverulenta_8y22E_48y55N_ad_m_A_Lycosidae
ctttatatttaatattaggtgtttgatcggctataataggaactgctatatcagtattaa
ttcgaatggaattaggtaatcctggaagtttattaggagatgatcatttatataatgtta
tagttactgctcatgcttttgtaatgattttttttatagtaataccaattcttattggtg
ggtttggtaattgattagttcctttaatattaggagcccctgatatatcatttcctcgta
taaataatctttctttttgattattacctccttctttatttttgttatgtatatcttcta
tagtagaaataggggtaggagctggttgaactgtttatcctcctttggcatcgagaatag
gtcatacaggaagttctatggattttgctattttttctcttcatttagctggggcttctt
ctattataggagcagtaaattttatttctactattattaatatacgaatattaggtatat
caatagagaaagttcctttatttgtttgatcagttttaattacagcagttttattattac
tttccttacctgttttagcaggtgctattactatattattaactgatcgaaattttaata
cttctttttttgatccagcaggtggaggggatcctattttatttcaacattta
>SMNKARA08978_Alopecosa_pulverulenta_8y22E_48y55N_ad_m_A_Lycosidae
ctttatatttaatattaggtgtttgatcggctataataggaactgctatatcagtattaa
ttcgaatggaattaggtaatcctggaagtttattaggagatgatcatttatataatgtta
tagttactgctcatgcttttgtaatgattttttttatagtaataccaattcttattggtg
ggtttggtaattgattagttcctttaatattaggagcccctgatatatcatttcctcgta
taaataatctttctttttgattattacctccttctttatttttgttatgtatatcttcta
tagtagaaataggggtaggagctggttgaactgtttatcctcctttggcatcgagaatag
gtcatacaggaagttctatggattttgctattttttctcttcatttagctggggcttctt
ctattataggagcagtaaattttatttctactattattaatatacgaatattaggtatat
caatagagaaagttcctttatttgtttgatcagttttaattacagcagttttattattac
tttccttacctgttttagcaggtgctattactatattattaactgatcgaaattttaata
cttctttttttgatctcagcggtggaggggatcctattttatttcaacattta
>SMNKARA08979_Alopecosa_pulverulenta_8y22E_48y55N_ad_m_A_Lycosidae
ctttatatttaatattaggtgtttgatcggctataataggaactgctatatcagtattaa
ttcgaatggaattaggtaatcctggaagtttattaggagatgatcatttatataatgtta
tagttactgctcatgcttttgtaatgattttttttatagtaataccaattcttattggtg
ggtttggtaattgattagttcctttaatattaggagcccctgatatatcatttcctcgta
taaataatctttctttttgattattacctccttctttatttttgttatgtatatcttcta
tagtagaaataggggtaggagctggttgaactgtttatcctcctttggcatcgagaatag
gtcatacaggaagttctatggattttgctattttttctcttcatttagctggggcttctt
ctattataggagcagtaaattttatttctactattattaatatacgaatattaggtatat
caatagagaaagttcctttatttgtttgatcagttttaattacagcagttttattattac
tttccttacctgttttagcaggtgctattactatattattaactgatcgaaattttaata
cttctttttttgatccagcaggtggaggggatcctattttatttcaacattta
>SMNKARA08980_Aulonia_albimana_8y22E_48y55N_ad_m_A_Lycosidae
ctttgtatttaatatttggtatttgatcggctatggtaggtacggctataagagtattga
ttcgaatggagttaggtcattctggaagtttattgggagatgatcatttgtataatgttg
tagttactgctcatgcgtttgttatgattttttttatagttatacctattttgattggag
gttttggaaattggttggttcctttaatattaggggctcctgatatatcatttcctcgta
taaataatctttctttttgattattacctccttctttgtttttattattaatgtcttctt
tggttgagataggggttggggcaggttgaactgtttatcctcctttggcttctagagttg
ggcatataggaagatctatggattttgctattttttctcttcatttggctggtgcttctt
ctatcatgggagctgtaaattttatttctacaattattaatatacgggtagttggaatat
ctatagataaggttcctttgtttgtttgatctgtttttgttactgctgttttattgcttt
tgtctttacctgttttagcgggtgctattactatgttattgactgatcgaaattttaata
cttctttttttgatcctgctgggggaggggatcctattttatttcaacattta
>SMNKARA08981_Pardosa_hortensis_8y22E_48y55N_ad_m_A_Lycosidae
ctttgtatttaatatttggagtttgatcggctataataggaactgctataagagtattaa
ttcggatagagttaggaaatcctggaagattattaggtgatgatcatttatataatgtta
tggttactgctcatgcttttgtaatgattttttttatagtgataccaattcttattggag
gatttggaaattgattggttcctttaatattgggtgctccagatatatcgtttcctcgga
taaataatctttctttttgattattacctccttctttgtttttattatctatatcctcta
tagtggagataggagttggtgctggatgaactgtttatcctcctttagcgtctacggttg
gtcatataggaagttcaatagattttgctattttttctcttcatttagctggggcttctt
ctattataggtgctgtaaattttatttctactattattaatatacgaatattaggtatat
ctatagagaaagttcctctttttgtttggtcagtattaattactgcagtattattgttgc
tttctttaccggttttagcgggtgctattactatattattaacagatcgtaattttaata
cttctttttttgatcctgctgggggtggtgatcctattttatttcaacattta
>SMNKARA08982_Xerolycosa_nemoralis_8y22E_48y55N_ad_f_A_Lycosidae
ctttatatttaatatttggggtatgatcagctatagctggaactgctataagagtattga
ttcgaatagaattagggaattctggtagtttattaggtgatgatcatttatataatgttg
ttgtaactgctcatgcttttgtgataattttttttatggtaatgcctattttaattggtg
ggtttggaaattgattagttcctttaatattaggagctcctgatatatcatttcctcgaa
taaataatctttctttttgattgttacctccttctttatttttattatttatatcttcta
tagtagaaatgggagttggagctggatgaacaatttatcctcctttggcttctagagttg
gacatataggaagttctatagattttgctattttttctcttcatttagctggagcttctt
ctattataggggcagtaaattttatttctactattattaatatacgtttagttggaataa
caatagaaaaagtacctttatttgtatgatctgtattaattaccgctattttattattat
tgtcattacctgttttagcaggggctattactatattattgactgatcgtaattttaata
cttctttttttgatcctgctggaggaggagatccaattttatttcaacatttg
>SMNKARA08983_Xerolycosa_nemoralis_8y22E_48y55N_ad_m_A_Lycosidae
ctttatatttaatatttggggtatgatcagctatagctggaactgctataagagtattga
ttcgaatagaattaggaaactctggtagtttattaggtgatgatcatttatataatgttg
ttgtaactgctcatgcttttgtgataattttttttatggttatacctattttgattggtg
ggtttggtaattgattagttcctttaatattaggagctcctgatatatcatttcctcgga
taaataatctttctttttgattattacctccttctttatttttattgtttatatcttcta
tagtagaaataggagttggagctggatgaacagtttatcctcctttggcttctagagttg
gacatataggaagctctatagattttgctattttttctcttcatttagctggggcttctt
ctattataggggcagtaaattttatttctactattattaatatacgtttagttggaataa
caatagaaaaagtacctttatttgtatgatctgtgttaattaccgctattttattattat
tatctttacctgttttagcaggagctattactatattattgactgatcgtaattttaata
cttctttttttgatcctgctggaggaggagatccaattttatttcaacatttg
>SMNKARA08984_Xerolycosa_nemoralis_8y22E_48y55N_ad_f_A_Lycosidae
ctttatatttaatatttggggtatgatcagctatagctggaactgctataagagtattga
ttcgaatagaattagggaattctggtagtttattaggtgatgatcatttatataatgttg
ttgtaactgctcatgcttttgtgataattttttttatggtaatgcctattttaattggtg
ggtttggaaattgattagttcctttaatattaggagctcctgatatatcatttcctcgaa
taaataatctttctttttgattgttacctccttctttatttttattatttatatcttcta
tagtagaaatgggagttggagctggatgaacaatttatcctcctttggcttctagagttg
gacatataggaagttctatagattttgctattttttctcttcatttagctggagcttctt
ctattataggggcagtaaattttatttctactattattaatatacgtttagttggaataa
caatagaaaaagtacctttatttgtatgatctgtattaattaccgctattttattattat
tgtcattacctgttttagcaggggctattactatattattgactgatcgtaattttaata
cttctttttttgatcctgctggaggaggagatccaattttatttcaacatttg
>SMNKARA08985_Xerolycosa_nemoralis_8y22E_48y55N_ad_m_A_Lycosidae
ctttatatttaatatttggggtatgatcagctatagctggaactgctataagagtattga
ttcgaatagaattagggaattctggtagtttattaggtgatgatcatttatataatgttg
ttgtaactgctcatgcttttgtgataattttttttatggtaatgcctattttaattggtg
ggtttggaaattgattagttcctttaatattaggagctcctgatatatcatttcctcgaa
taaataatctttctttttgattgttacctccttctttatttttattatttatatcttcta
tagtagaaatgggagttggagctggatgaacaatttatcctcctttggcttctagagttg
gacatataggaagttctatagattttgctattttttctcttcatttagctggagcttctt
ctattataggggcagtaaattttatttctactattattaatatacgtttagttggaataa
caatagaaaaagtacctttatttgtatgatctgtattaattaccgctattttattattat
tgtcattacctgttttagcaggggctattactatattattgactgatcgtaattttaata
cttctttttttgatcctgctggaggaggagatccaattttatttcaacatttg
>SMNKARA08993_Pirata_uliginosus_8y48E_48y97N_ad_m_A_Lycosidae
cattatatttaatttttggtgtgtgatcagctataattggtactggaataagagttttaa
ttcgaatggaattaggtcattctggaagtttattaggagatgatcatttatataatgtaa
tagttactgctcatgcttttgtaataattttttttatagtaataccaattttaattggtg
gttttggtaattgattagttcctttaatattaggagcgcctgatatatcatttccacgga
taaataatttatcattttgattattacctccatctttatttttattattaatatcatcaa
tagtggaaataggagtaggagctgggtgaacagtttatccgcctttagcttctagagtag
gtcatataggaagatctatagattttgctattttttctttacatttagcaggtgcttctt
ctattataggagcagtaaattttatttctactattattaatatacgaatattagggataa
gaatagaaaaaattccattatttgtatggtctgttcttattacagctgtattattgcttt
tatcattaccagtcttggctggtgctattactatattgcttactgatcgaaattttaata
cttcattttttgaccctgctgggggaggagatccaattttatttcaacattta
>SMNKARA08995_Drassyllus_pusillus_8y48E_48y97N_ad_m_A_Gnaphosidae
ctttatatttattatttggttcatgagctgctatggtggggactgctataagtgttttaa
ttcgtatagaattaggtcaatctggaagatttataggtgatgatcaattatataatgtga
ttgtaactgctcatgcatttgttataattttttttatagttataccaattttaattggtg
ggtttggaaattgattagttcctttgatgttaggtgctcctgatatggcatttcctcgaa
taaataatttaagtttttgattattacctccttcgttgatgttattatttatttcttcaa
tagtagaaataggggttggtgctggttgaactgtatatccgccattggcttctaatgtag
gacattcaggaagagctatggattttgctattttttctttacatttagcaggagcttctt
ctattatgggagctgtaaattttatttctactgtaattaatatgcgttctattgggataa
aaatagaaaggattcctttgtttgtgtgatcagtacttatcactgctgtattattattat
tgtcattacctgtgttagcaggtgctattactatgctgttgactgatcgtaattttaata
cttcgttttttgatccagcaggtgggggagacccaattttatttcagcattta
>SMNKARA08997_Drassyllus_pusillus_8y48E_48y97N_ad_m_A_Gnaphosidae
ctttatatttattatttggttcatgagctgctatggtggggactgctataagtgttttaa
ttcgtatagaattaggtcaatctggaagatttataggtgatgatcaattatataatgtga
ttgtaactgctcatgcatttgttataattttttttatagttataccaattttaattggtg
ggtttggaaattgattagttcctttgatgttaggtgctcctgatatggcatttcctcgaa
taaataatttaagtttttgattattacctccttcgttgatgttattatttatttcttcaa
tagtagaaataggggttggtgctggttgaactgtatatccgccattggcttctaatgtag
gacattcaggaagagctatggattttgctattttttctttacatttagcaggagcttctt
ctattatgggagctgtaaattttatttctactgtaattaatatgcgttctattgggataa
aaatagaaaggattcctttgtttgtgtgatcagtacttatcactgctgtattattattat
tgtcattacctgtgttagcaggtgctattactatgctgttgactgatcgtaattttaata
cttcgttttttgatccagcaggtgggggagacccaattttatttcagcattta
>SMNKARA08998_Drassyllus_pusillus_8y48E_48y97N_ad_m_A_Gnaphosidae
ctttatatttattatttggttcatgagctgctatggtggggactgctataagtgttttaa
ttcgtatagaattaggtcaatctggaagatttataggtgatgatcaattatataatgtga
ttgtaactgctcatgcatttgttataattttttttatagttataccaattttaattggtg
ggtttggaaattgattagttcctttgatgttaggtgctcctgatatggcatttcctcgaa
taaataatttaagtttttgattattacctccttcgttgatgttattatttatttcttcaa
tagtagaaataggggttggtgctggttgaactgtatatccgccattggcttctaatgtag
gacattcaggaagagctatggattttgctattttttctttacatttagcaggagcttctt
ctattatgggagctgtaaattttatttctactgtaattaatatgcgttctattgggataa
aaatagaaaggattcctttgtttgtgtgatcagtacttatcactgctgtattattattat
tgtcattacctgtgttagcaggtgctattactatgctgttgactgatcgtaattttaata
cttcgttttttgatccagcaggtgggggagacccaattttatttcagcattta
>SMNKARA08999_Ozyptila_praticola_8y48E_48y97N_ad_m_A_Thomisidae
ctttatatttattatttggtgcttgatcagctatagttggtactgcaataagagttttaa
ttcgaatggaattgggtaatgtaggaagattattaggaaatgatcatttatataatgtgg
ttgttacagctcatgcttttgtaatgattttttttatagtaatgccaattttgattggag
gttttgggaattgattggttcctttaatattaggtgctcctgatatatcttttcctcgaa
taaataatttatctttttgacttcttcctccttcattatttttattatttatatcatcta
tagttgaaataggggtaggagcaggatggactgtttatcctcctttggcttctagaattg
gtcatataggaagatcaatggattttgctattttttctcttcatttagcgggtgcttctt
ctattataggggctgttaattttattactactattattaatatacgaacagttggaataa
gaatagaaaaggttcctttatttgtttggtcagtattaattacagctattttattgcttt
tatcattacctgttttagcaggggcgattacaatattattaacagatcgaaattttaata
cttctttttttgaccctgctggtgggggggatcctattttatttcaacattta
>SMNKARA09000_Robertus_lividus_8y48E_48y97N_ad_f_A_Theridiidae
ctttatatttaatttttggggtgtgatcagctatagttggtacagctataagtgtattaa
ttcgggtagaattagggcaatctggaagattgctaggggatgatcaattgtataatgtaa
ttgtaactgctcatgcttttgtaataattttttttatagtaatacctattataattgggg
ggtttggaaattgattagttcctttaatattaggggctccagatatagcttttcctcgaa
taaataatttaagattttgattattacctccttctttatttttattatttatttcttcca
tagttgaaataggagtaggtgctggatgaacaatttatcctcctttatcttctttagaag
gtcattcaggaagatcagttgattttgcaattttttctcttcatcttgcaggagcttctt
ctattataggggctgtaaattttatttctactattttaaatatacgtgtatatggaatat
ctatagaaaaagttactttatttgtatggtcagttttaattactgctattcttttattat
tatcattacctgttttagcaggggctattactatattgttaactgatcgaaattttaata
cttctttttttgatccttctggaggaggagatccaattttatttcaacattta
>SMNKARA09001_Microneta_viaria_8y48E_48y97N_ad_f_A_Linyphiidae
gtttatattttgtatttggggcttggtctgcgatagttggaacggcaataagagtattaa
ttcgagttgagttaggtcaagttggtagtttgttaggagatgatcaattatataatgtaa
ttgttacggctcacgcttttgttataattttttttatagtgataccaattttaattgggg
gatttggtaattggttagttcctttaatattaggggctccagatatagctttccctcgga
taaataatttgagattttgacttttacccccctctttatttttattgtttatttcaagta
tagatgagataggggtaggggcaggttggacagtttatcctcctctttcttcattagatg
ggcattcgggaagttcagtggattttgctattttttctttacatttagctggggcatctt
ctattatgggggctattaattttatttctactattttaaatatacgagggtatgggataa
gcatagatagggttcctttatttgtttggtctgtattaattacggctgttcttttattgg
tatctttgccagtgttagcaggggcgattacgatgttgttatcagatcgaaatttcaata
catcattttttgatcctgctggagggggggatcctgttttgtttcaacactta
>SMNKARA09002_Tenuiphantes_flavipes_8y48E_48y97N_ad_m_A_Linyphiidae
ctgtatatgttattttaggagcgtgagctgctatagtaggaactgctataagagtattaa
ttcggattgaattggggcaaactggaagaatactgggggatgaccagttgtataatgtta
ttgtaactgcacatgcttttgtaataattttttttatagttatacctattttgattggag
gattcggtaattgattagttcctttaatactaggggctcctgatatagcttttcctcgta
taaataatttaagattttgacttttacccccttctctattattattatttatttcaagta
tagttgagatgggagttggggcagggtggacagtgtatccgcctcttgcctctttagagg
gacatgcaggaagttctgttgattttgctattttttctttacatttagctggggcttctt
ctattataggggcaattaattttatttccactattattaatatgcgtggatacggtgtat
caatggaaaaggttccgttatttgtatgatctgttttaattactgcggttcttttgttgt
tatcattacctgttttagctggtgctattactatacttttaactgatcagaattttaata
cttcgttttttgatcctgcaggaggannnnnnnnnnnnnnnnnnnnnnnnnnn
>SMNKARA09003_Tenuiphantes_flavipes_8y48E_48y97N_ad_f_A_Linyphiidae
ctttatattttatttttggagcgtgagctgctatagtaggaactgctataagagtattaa
ttcggattgaattggggcaaactggaagaatactgggggatgaccagttgtataatgtta
ttgtaactgcacatgcttttgtaataattttttttatagttatacctattttgattggag
gattcggtaattgattagttcctttaatactaggggctcctgatatagcttttcctcgta
taaataatttaagattttgacttttacccccttctctattattattatttatttcaagta
tagttgagatgggagttggggcagggtggacagtgtatccgcctcttgcctctttagagg
gacatgcaggaagttctgttgattttgctattttttctttacatttagctggggcttctt
ctattataggggcaattaattttatttccactattattaatatgcgtggatacggtgtat
caatggaaaaggttccgttatttgtatgatctgttttaattactgcggttcttttgttgt
tatcattacctgttttagctggtgctattactatacttttaactgatcgaaattttaata
cttcgttttttgatcctgcaggaggaggagatcctgtgttatttcaacattta
>SMNKARA09005_Maso_sundevalli_8y48E_48y97N_ad_m_A_Linyphiidae
gtttatattttgtgtttggtgcgtgagctgccatagtgggtacggcgatgagagtattaa
ttcgaattgagttgggacagactggtagattattaggggatgaccagttgtataacgtta
ttgttactgctcatgcttttgttatgattttttttatggttatacctattttaattgggg
ggtttgggaattggttagtaccgttgatgttgggagctccagatatagctttcccccgca
taaacaacttgagattttgattgttgcccccttctttattattattatttatttctagaa
tagatgagataggggtgggggcaggttgaactgtttatccaccgcttgcttctttagagg
ggcattctgggagttcagtagattttgctattttttctcttcatttagctggggcatcgt
ctattatgggggctattaattttatttctactattattaatatgcggggttatggtataa
ctatagaaaaggtccccttatttgtatggtctgtattaattacagcagtattattgttgt
tatctttgccagttttagcaggagcgattactatgcttttaacagatcgaaactttaata
cttctttttttgaccctgcgggaggaggggatcctgttttgtttcaacactta
>SMNKARA09006_Stemonyphantes_lineatus_8y48E_48y97N_ad_f_A_Linyphiidae
cattatatttaatttttggtgcgtgggctgctatggtagggactgcaataagtgttttaa
tccgaattgaattaggtcaaactgggagattattgggggatgatcatctttataatgtaa
ttgtaacagctcatgcatttgttataattttttttatggttatacctattttgattgggg
gttttggaaattggttggttcctttgatgttgggggctccagatatagctttccctcgta
tgaataatttgagtttttggttgttacctccttctttatttttattatttatttcttcta
tggtggaaataggggttgggtcaggttggactgtttacccccctttagcttctttagatg
ggcacgctggtagatctgttgattttgctattttttcgttacatttagctggggcttcat
ctattataggggctattaattttatttctactattattaatatacgttcttgggggataa
gaatagaaaaggttcctttgtttgtgtgatcggttttaattacagctgttttattattat
tatcattacctgtgcttgctggtgctattactatattgctgacagatcgaaattttaata
cttctttttttgatccagctgggggtggggatcctgttctttttcaacattta
>SMNKARA09007_Pardosa_prativaga_8y48E_48y97N_ad_m_A_Lycosidae
ctttatatttaatgtttggagtttgatcagctataataggaactgctataagagtgttaa
ttcgaatagaattaggaaatcctggaagattattaggtgatgatcatttgtataatgtta
tagttactgctcatgcttttgtaataattttttttatagtaataccaattcttattggag
gttttgggaattgattggttcctttaatattaggagctccagatatatcatttcctcgaa
taaataatctttctttttgattattacctccttctttatttttattatctatatcttcta
tagtagaaataggggttggtgctgggtgaactgtttatcctcctttagcatctacagttg
gtcatataggaaattcaatagattttgctattttttctcttcatttggctggggcttctt
ctattataggggctgtaaattttatttctactattattaatatacgaatattaggtatat
cttttgaaaaggttcctctttttgtttgatcagttttaattacagcagtattattattac
tttctttacctgttttagcaggtgctattactatattattaacagatcgaaattttaata
cttctttttttgatcctgctggtggaggggatcctattttatttcaacattta
>SMNKARA09008_Pirata_uliginosus_8y48E_48y97N_ad_m_A_Lycosidae
cattatatttaatttttggtgtgtgatcagctataattggtactggaataagagttttaa
ttcgaatggaattaggtcattctggaagtttattaggagatgatcatttatataatgtaa
tagttactgctcatgcttttgtaataattttttttatagtaataccaattttaattggtg
gttttggtaattgattagttcctttaatattaggagcgcctgatatatcgtttccacgga
taaataatttatcattttgattattacctccatctttatttttattattaatatcatcaa
tagtggaaataggagtaggagctgggtgaacagtttatccgcctttagcttctagagtag
gtcatataggaagatctatagattttgctattttttctttacatttagcaggtgcttctt
ctattataggagcagtaaattttatttctactattattaatatacgaatattagggataa
gaatagaaaaaattccattatttgtgtggtctgttcttattacagctgtattattgcttt
tatcattaccagttttggctggtgctattactatattgcttactgatcgaaattttaata
cttcattttttgaccctgctgggggaggagatccaattttatttcaacattta
>SMNKARA09009_Agyneta_affinis_8y48E_48y97N_ad_m_A_Linyphiidae
gtttatattttatttttggagcttgagcggctatagttggtacagcaataagagtattaa
ttcgtattgagttaggacaaacgggtagattattaggtgatgatcagttgtataatgtta
ttgtaacagcccatgcttttgttataattttttttatagttataccaattttaattggtg
gatttggaaattggttggttcctttaatgttaggagcccctgatatagcttttcctcgta
taaataatttgagattttgattattaccaccttctttatttttactttttatctctagta
tagatgaaataggagttgggacagggtgaactgtttatccccctattgcttctttagagg
ggcatgccggtagatctgttgattttgccattttttctttacacttggctggggcttcgt
caattataggggctattaattttatttctactattttaaatatgcggggttacggtataa
cgatagaaaaagttcctttatttgtttggtctgttcttattacagctgttttattgctgt
tatctttacctgttttagctggtgctattactatgttgttaactgatcgtaattttaata
catcantttttgatccgtcggggggaggagatccggtcttatttcaacattta
>SMNKARA09010_Agyneta_affinis_8y48E_48y97N_ad_m_A_Linyphiidae
gtttatattttatttttggagcttgagcggctatagttggtacagcaataagagtattaa
ttcgtattgagttaggacaaacgggtagattattaggtgatgatcagttgtataatgtta
ttgtaacagcccatgcttttgttataattttttttatagttataccaattttaattggtg
gatttggaaattggttggttcctttaatgttaggagcccctgatatagcttttcctcgta
taaataatttgagattttgattattaccaccttctttatttttactttttatctctagta
tagatgaaataggagttgggacagggtgaactgtttatccccctattgcttctttagagg
ggcatgccggtagatctgttgattttgccattttttctttacacttggctggggcttcgt
caattataggggctattaattttatttctactattttaaatatgcggggttacggtataa
cgatagaaaaagttcctttatttgtttggtctgttcttattacagctgttttattgctgt
tatctttacctgttttagctggtgctattactatgttgttaactgatcgtaatttnnnnn
nnnnnnnnnnnnnnnnnnnnnnnnnnnnnnnnnnnnnnnnnnnnnnnnnnnnn
>SMNKARA09011_Agyneta_affinis_8y48E_48y97N_ad_m_A_Linyphiidae
gtttatattttatttttggagcttgagcggctatagttggtacagcaataagagtattaa
ttcgtattgagttaggacaaacgggtagattattaggtgatgatcagttgtataatgtta
ttgtaacagcccatgcttttgttataattttttttatagttataccaattttaattggtg
gatttggaaattggttggttcctttaatgttaggagcccctgatatagcttttcctcgta
taaataatttgagattttgattattaccaccttctttatttttactttttatctctagta
tagatgaaataggagttgggacagggtgaactgtttatccccctattgcttctttagagg
ggcatgccggtagatctgttgattttgccattttttctttacacttggctggggcttcgt
caattataggggctattaattttatttctactattttaaatatgcggggttacggtataa
cgatagaaaaagttcctttatttgtttggtctgttcttattacagctgttttattgctgt
tatctttacctgttttagctggtgctattactatgttgttaactgatcgtaattttaata
catcattttttgatccgtcggggggaggagatccggtcttatttcaacattta
>SMNKARA09012_Pirata_uliginosus_8y48E_48y97N_ad_f_A_Lycosidae
cattatatttaatttttggtgtgtgatcagctataattggtactggaataagagttttaa
ttcgaatggaattaggtcattctggaagtttattaggagatgatcatttatataatgtaa
tagttactgctcatgcttttgtaataattttttttatagtaataccaattttaattggtg
gttttggtaattgattagttcctttaatattaggagcgcctgatatatcatttccacgga
taaataatttatcattttgattattacctccatctttatttttattattaatatcatcaa
tagtggaaataggagtaggagctgggtgaacagtttatccgcctttagcttctagagtag
gtcatataggaagatctatagattttgctattttttctttacatttagcaggtgcttctt
ctattataggagcagtaaattttatttctactattattaatatacgaatattagggataa
gaatagaaaaaattccattatttgtatggtctgttcttattacagctgtattattgcttt
tatcattaccagtcttggctggtgctattactatattgcttactgatcgaaattttaata
cttcattttttgaccctgctgggggaggagatccaattttatttcaacattta
>SMNKARA09013_Pirata_uliginosus_8y48E_48y97N_ad_f_A_Lycosidae
cattatatttaatttttggtgtgtgatcagctataattggtactggaataagagttttaa
ttcgaatggaattaggtcattctggaagtttattaggagatgatcatttatataatgtaa
tagttactgctcatgcttttgtaataattttttttatagtaataccaattttaattggtg
gttttggtaattgattagttcctttaatattaggagcgcctgatatatcatttccacgga
taaataatttatcattttgattattacctccatctttatttttattattaatatcatcaa
tagtggaaataggagtaggagctgggtgaacagtttatccgcctttagcttctagagtag
gtcatataggaagatctatagattttgctattttttctttacatttagcaggtgcttctt
ctattataggagcagtaaattttatttctactattattaatatacgaatattagggataa
gaatagaaaaaattccattatttgtatggtctgttcttattacagctgtattattgcttt
tatcattaccagtcttggctggtgctattactatattgcttactgatcgaaattttaata
cttcattttttgaccctgctgggggaggagatccaattttatttcaacattta
>SMNKARA09014_Pirata_uliginosus_8y48E_48y97N_ad_m_A_Lycosidae
cattatatttaatttttggtgtgtgatcagctataattggtactggaataagagttttaa
ttcgaatggaattaggtcattctggaagtttattaggagatgatcatttatataatgtaa
tagttactgctcatgcttttgtaataattttttttatagtaataccaattttaattggtg
gttttggtaattgattagttcctttaatattaggagcgcctgatatatcgtttccacgga
taaataatttatcattttgattattacctccatctttatttttattattaatatcatcaa
tagtggaaataggagtaggagctgggtgaacagtttatccgcctttagcttctagagtag
gtcatataggaagatctatagattttgctattttttctttacatttagcaggtgcttctt
ctattataggagcagtaaattttatttctactattattaatatacgaatattagggataa
gaatagaaaaaattccattatttgtgtggtctgttcttattacagctgtattattgcttt
tatcattaccagttttggctggtgctattactatattgcttactgatcgaaattttaata
cttcattttttgaccctgctgggggaggagatccaattttatttcaacattta
>SMNKARA09015_Pirata_uliginosus_8y48E_48y97N_ad_m_A_Lycosidae
cattatatttaatttttggtgtgtgatcagctataattggtactggaataagagttttaa
ttcgaatggaattaggtcattctggaagtttattaggagatgatcatttatataatgtaa
tagttactgctcatgcttttgtaataattttttttatagtaataccaattttaattggtg
gttttggtaattgattagttcctttaatattaggagcgcctgatatatcgtttccacgga
taaataatttatcattttgattattacctccatctttatttttattattaatatcatcaa
tagtggaaataggagtaggagctgggtgaacagtttatccgcctttagcttctagagtag
gtcatataggaagatctatagattttgctattttttctttacatttagcaggtgcttctt
ctattataggagcagtaaattttatttctactattattaatatacgaatattagggataa
gaatagaaaaaattccattatttgtgtggtctgttcttattacagctgtattattgcttt
tatcattaccagttttggctggtgctattactatattgcttactgatcgaaattttaata
cttcantttttgaccctgctgggggaggagatccaattttatttcaacattta
>SMNKARA09016_Pirata_uliginosus_8y48E_48y97N_ad_m_A_Lycosidae
cattatatttaatttttggtgtgtgatcagctataattggtactggaataagagttttaa
ttcgaatggaattaggtcattctggaagtttattaggagatgatcatttatataatgtaa
tagttactgctcatgcttttgtaataattttttttatagtaataccaattttaattggtg
gttttggtaattgattagttcctttaatattaggagcgcctgatatatcatttccacgga
taaataatttatcattttgattattacctccatctttatttttattattaatatcatcaa
tagtggaaataggagtaggagctgggtgaacagtttatccgcctttagcttctagagtag
gtcatataggaagatctatagattttgctattttttctttacatttagcaggtgcttctt
ctattataggagcagtaaattttatttctactattattaatatacgaatattagggataa
gaatagaaaaaattccattatttgtatggtctgttcttattacagctgtattattgcttt
tatcattaccagtcttggctggtgctattactatattgcttactgatcgaaattttaata
cttcattttttgaccctgctgggggaggagatccaattttatttcaacattta
>SMNKARA09017_Zora_spinimana_8y48E_48y97N_ad_m_A_Miturgidae
ctttgtatttaatttttggagtttgatctgctatagtaggaactgctataagaatattaa
ttcgtatagaattaggacaagttggaagatttatgggggatgatcatttatataatgtaa
ttgttaccgctcatgcgtttgttataattttttttatagttatgcctattatgattgggg
gattcggaaattggttgattcctttaatgttaggagctcctgatatagcttttcctcgaa
taaataatttaagattttgattattgcctccttctttattattattatttatttcttcta
tagttgaaataggggttggagctgggtgaacagtttatcctcctttagcttctgtaatag
gtcattctggaagagccatagattttgctattttttctttacatttagctggtgcttcat
ctattataggagctattaattttatcactactgtaattaatatacgatctattggaataa
ctatagaaaagattcctttgtttgtatgatcagttgcaattactgctgttcttttattat
tatctttaccagtattagctggtgctattactatattattgactgatcgtaattttaata
cttctttttttgatcctgcggggggaggagatccaattttgtttcaacattta
>SMNKARA09018_Phrurolithus_festivus_8y48E_48y97N_ad_m_A_Phrurolithidae
ctttatatttattatttggttcatgatcagctatagttggtacggctataagagtaatta
ttcgtatggaattgggacaggttggaagattgttgggtgatgatcatttatataatgtta
ttgtaacggcgcatgcatttattataattttttttatagtaataccaattttaattggtg
ggtttggtaattgactgattcctctaatattaggtgctcctgatatggcttttcctcgta
taaataatttgagtttttgattgttacctccttcattaattttattatccatctcttcta
tagctgaaataggggtgggtgctgggtgaactgtgtatcctcctctagcttctagagtag
gacattctggtagtgctattgattttgctattttttctttgcatttggctggtgcttctt
ctattatagggtcaattaattttatttctactattattaatatacgttcatatggtataa
gaatggaaagggttccattatttgtctgatcagtatttattacaacaatcttgttattat
tatctttaccagttttagctggagctattactatattattaactgatcgtaattttaata
cgtctttttttgatcctgctggggggggggatcctattttatttcaacattta
>SMNKARA09020_Ozyptila_simplex_8y48E_48y97N_ad_m_A_Thomisidae
ctttatatttattatttggagcttgatcagcaatagttggaactgcaataagagttttaa
ttcgaatagaattaggaaatgtgggaagattattaggaaatgatcatttatataatgtgg
ttgttacagctcatgcttttgttataattttttttatagtaatgccaattttgattggag
gttttggaaattggctagttcccttaatattaggggccccagatatatcatttcctcgta
taaataatttgtctttttgattactacctccttcattatttttattgtttatatcttcta
tagttgaaataggagtaggggcagggtgaactgtttatcctcctttggcttctagaattg
gtcatataggaagatctatagattttgctattttttctcttcatttagcaggtgcttctt
ctattataggagctgttaattttattactactattattaatatacgttctgttgggataa
caatagaaaaggttcctttatttgtttggtcagtattaattacagctattttattgcttt
tatcattacctgtttnnnnnnnnnnnnnnnnnnnnnnnnnnnnnnnnnnnnnnnnnnnnn
nnnnnnnnnnnnnnnnnnnnnnnnnnnnnnnnnnnnnnnnnnnnnnnnnnnnn
>SMNKARA09022_Aulonia_albimana_8y48E_48y97N_ad_m_A_Lycosidae
ctttgtatttaatatttggtatttgatcggctatggtaggtacggctataagagtattga
ttcgaatggagttaggtcattctggaagtttattgggagatgatcatttgtataatgttg
tagttactgctcatgcatttgttatgattttttttatagttatacctattttgattggag
gttttggaaattggttggttcctttaatattaggggctcctgatatatcatttcctcgta
taaataatctttctttttgattattacctccttctttgtttttattattaatgtcttctt
tggttgagataggggttggggcaggttgaactgtttatcctcctttggcttctagagttg
ggcatataggaagatctatggattttgctattttttctcttcatttggctggtgcttctt
ctattatgggagctgtaaattttatttctacaattattaatatacgggtagttggaatat
ctatagataaggttcctttgtttgtttgatctgtttttgttactgctgttttattgcttt
tgtctctacctgttttagcgggtgctattactatgttattgactgatcgaaattttaata
cttctttttttgatcctgctgggggaggggatcctattttatttcaacattta
>SMNKARA09023_Aulonia_albimana_8y48E_48y97N_ad_m_A_Lycosidae
ctttgtatttaatatttggtatttgatcggctatggtaggtacggctataagagtattga
ttcgaatggagttaggtcattctggaagtttattgggagatgatcatttgtataatgttg
tagttactgctcatgcatttgttatgattttttttatagttatacctattttgattggag
gttttggaaattggttggttcctttaatattaggggctcctgatatatcatttcctcgta
taaataatctttctttttgattattacctccttctttgtttttattattaatgtcttctt
tggttgagataggggttggggcaggttgaactgtttatcctcctttggcttctagagttg
ggcatataggaagatctatggattttgctattttttctcttcatttggctggtgcttctt
ctattatgggagctgtaaattttatttctacaattattaatatacgggtagttggaatat
ctatagataaggttcctttgtttgtttgatctgtttttgttactgctgttttattgcttt
tgtctctacctgttttagcgggtgctattactatgttattgactgatcgaaattttaata
cttctttttttgatcctgctgggggaggggatcctattttatttcaacattta
>SMNKARA09024_Aulonia_albimana_8y48E_48y97N_ad_m_A_Lycosidae
ctttgtatttaatatttggtatttgatcggctatggtaggtacggctataagagtattga
ttcgaatggagttaggtcattctggaagtttattgggagatgatcatttgtataatgttg
tagttactgctcatgcatttgttatgattttttttatagttatacctattttgattggag
gttttggaaattggttggttcctttaatattaggggctcctgatatatcatttcctcgta
taaataatctttctttttgattattacctccttctttgtttttattattaatgtcttctt
tggttgagataggggttggggcaggttgaactgtttatcctcctttggcttctagagttg
ggcatataggaagatctatggattttgctattttttctcttcatttggctggtgcttctt
ctattatgggagctgtaaattttatttctacaattattaatatacgggtagttggaatat
ctatagataaggttcctttgtttgtttgatctgtttttgttactgctgttttattgcttt
tgtctctacctgttttagcgggtgctattactatgttattgactgatcgaaattttaata
cttctttttttgatcctgctgggggaggggatcctattttatttcaacattta
>SMNKARA09027_Ozyptila_praticola_8y48E_48y97N_ad_m_A_Thomisidae
ctttatatttattatttggtgcttgatcagctatagttggtactgcaataagagttttaa
ttcgaatggaattgggtaatgtaggaagattattaggaaatgatcatttatataatgtgg
ttgttacagctcatgcttttgtaatgattttttttatagtaatgccaattttgattggag
gttttgggaattgattggttcctttaatattaggtgctcctgatatatcttttcctcgaa
taaataatttatctttttgacttcttcctccttcattatttttattatttatatcatcta
tagttgaaataggggtaggagcaggatggactgtttatcctcctttggcttctagaattg
gtcatataggaagatcaatggattttgctattttttctcttcatttagcgggtgcttctt
ctattataggggctgttaattttattactactattattaatatacgaacagttggaataa
gaatagaaaaggttcctttatttgtttggtcagtattaattacagctattttattgcttt
tatcattacctgttttagcaggggcgattacaatattattaacagatcgaaattttaata
cttctttttttgaccctgctggtgggggggatcctattttatttcaacattta
>SMNKARA09028_Ozyptila_praticola_8y48E_48y97N_ad_m_A_Thomisidae
ctttatatttattatttggtgcttgatcagctatagttggtactgcaataagagttttaa
ttcgaatggaattgggtaatgtaggaagattattaggaaatgatcatttatataatgtgg
ttgttacagctcatgcttttgtaatgattttttttatagtaatgccaattttgattggag
gttttgggaattgattggttcctttaatattaggtgctcctgatatatcttttcctcgaa
taaataatttatctttttgacttcttcctccttcattatttttattatttatatcatcta
tagttgaaataggagtaggagcaggatggactgtttatcctcctttggcttctagaattg
gtcatataggaagatcaatggattttgctattttttctcttcatttagcgggtgcttctt
ctattataggggctgttaattttattactactattattaatatacgaacagttggaataa
gaatagaaaaggttcctttatttgtttgatcagtattaattacagctattttattgcttt
tatcattacctgttttagcaggggcgattacaatattattaacagatcgaaattttaata
cttctttttttgatcctgctggtgggggggatcctattttatttcaacattta
>SMNKARA09030_Tenuiphantes_flavipes_8y48E_48y97N_ad_f_A_Linyphiidae
ctttatattttatttttggagcgtgagctgctatagtaggaactgctataagagtattaa
ttcggattgaattggggcaaactggaagaatactgggggatgaccagttgtataatgtta
ttgtaactgcacatgcttttgtaataattttttttatagttatacctattttgattggag
gattcggtaattgattagttcctttaatactaggggctcctgatatagcttttcctcgta
taaataatttaagattttgacttttacccccttctctattattattatttatttcaagta
tagttgagatgggagttggggcagggtggacagtgtatccgcctcttgcctctttagagg
gacatgcaggaagttctgttgattttgctattttttctttacatttagctggggcttctt
ctattataggggcaattaattttatttccactattattaatatgcgtggatacggtgtat
caatggaaaaggttccgttatttgtatgatctgttttaattactgcggttcttttgttgt
tatcattacctgttttagctggtgctattactatacttttaactgatcgaaattttaata
cttcgttttttgatcctgcaggaggaggagatcctgtgttatttcaacattta
>SMNKARA09031_Diplocephalus_picinus_8y48E_48y97N_ad_m_A_Linyphiidae
gtttatattttatttttggggcttgggctgctatagttggaacagcgataagagttttaa
ttcggattgagttaggtcaaactggaagattattgggggatgatcaattatataatgtta
ttgttacagctcatgcatttgttataattttttttatagtaatacctattttgattgggg
ggtttgggaattggttagttcctcttatgttaggggcaccggatatagcttttcctcgta
taaacaatttaagtttttgattattacctccttccttatttttgttatttatttctagaa
tagatgagataggagttggggcaggatggactgtgtatccgccgttagcatctttagatg
ggcatccgggtagatcagttgattttgcaattttttctttacatctagctggagcatctt
caattataggggctattaattttatttctactattttaaacatacgggggtatgggatat
ctatagatagggttcctttatttgtttggtctgtcttaattactgctattttattacttt
tgtctttaccagtattagcgggggcgattacgatacttttaacagatcgtaattttaata
cttcattttttgacccttctggaggaggggatcctgttctatttcaacactta
>SMNKARA09032_Enoplognatha_thoracica_8y48E_48y97N_ad_m_A_Theridiidae
cattatatttattatttggggcttgagctgcaatagtggggacagcaatgagagttttaa
ttcgtattgagttaggtcaaacagggagatttttaggtgatgatcaattatataatgtaa
ttgtaactgctcatgcttttgttatgattttttttatagtaatacctattttaattggag
gttttggaaattgattagttcctttaatattaggggctccggatatagcttttccacgaa
taaataatcttagtttttgattattacctccttctttaatattattatttatttcttcaa
tagtggagataggagttggggcaggatgaacagtttatccccctttatcttctttagaag
gtcatgctgggagatcggtagattttgctattttttctttacatttagcgggagcttctt
caattataggggcaattaattttatttctactattttaaatatacgttcttttggaatat
ctatagagaaagtttctttatttgtttgatctgtattaattactgctgtattattacttt
tatcacttcctgtattagctggggctattactatattattaacagatcgaaattttaata
cttctttttttgaccctgctgggggaggggatcctattttatttcaacattta
>SMNKARA09033_Phrurolithus_festivus_8y48E_48y97N_ad_m_A_Phrurolithidae
ctttatatttattatttggttcatgatcagctatagttggtacggctataagagtaatta
ttcgtatggaattgggacaggttggaagattgttgggtgatgatcatttatataatgtta
ttgtaacggcgcatgcatttattataattttttttatagtaataccaattttaattggtg
ggtttggtaattgactgattcctctaatattaggtgctcctgatatggcttttcctcgta
taaataatttgagtttttgattgttacctccttcattaattttattatccatctcttcta
tagctgaaataggggtgggtgctgggtgaactgtgtatcctcctctagcttctagagtag
gacattctggtagtgctattgattttgctattttttctttgcatttggctggtgcttctt
ctattatagggtcaattaattttatttctactattattaatatacgttcatatggtataa
gaatggaaagggttccattatttgtctgatcagtatttattacaacaatcttgttattat
tatctttaccagttttagctggagctattactatattattaactgatcgcaattttaann
nnnnnnnnnnnnnnnnnnnnnnnnnnnnnnnnnnnnnnnnnnnnnnnnnnnnn
>SMNKARA09034_Zelotes_subterraneus_8y48E_48y97N_ad_f_A_Gnaphosidae
ctttatatttattatttggttcatgggctgctatagtagggactgctataagagtattaa
ttcgtatagaattaggtcaacctggaagatttataggtgatgatcatttatataatgtta
ttgtaactgctcatgcatttgttatgattttttttatagttatgcctattttaattggtg
ggtttggaaattgattagttcctttgatactgggggctccagatatagcatttcctcgca
tgaataatttaagtttttgactattacctccttcattaatactattatttatttcttcta
tggtagaaataggagtaggtgctggttgaactgtatatccgcctttagcttctaatatag
gtcattcgggaagagctatggattttgctattttttctttgcatttagcgggtgcttcgt
ctattataggagcaattaattttatttctactgtaattaatatgcgttctattggaataa
gtatggagaaggttcctttgtttgtatgatcagtatttattactgcggtactattattat
tatctttacctgtattagcaggtgctattactatattattaactgatcgtaattttaata
cttcgttttttgatcctgctggaggaggggatcctattttatttcaacattta
>SMNKARA09035_Ozyptila_praticola_8y48E_48y97N_ad_m_A_Thomisidae
ctttatatttattatttggtgcttgatcagctatagttggtactgcaataagagttttaa
ttcgaatggaattgggtaatgtaggaagattattaggaaatgatcatttatataatgtgg
ttgttacagctcatgcttttgtaatgattttttttatagtaatgccaattttgattggag
gttttgggaattgattggttcctttaatattaggtgctcctgatatatcttttcctcgaa
taaataatttatctttttgacttcttcctccttcattatttttattatttatatcatcta
tagttgaaataggggtaggagcaggatggactgtttatcctcctttggcttctagaattg
gtcatataggaagatcaatggattttgctattttttctcttcatttagcgggtgcttctt
ctattataggggctgttaattttattactactattattaatatacgaacagttggaataa
gaatagaaaaggttcctttatttgtttggtcagtattaattacagctattttattgcttt
tatcattacctgttttagcaggggcgattacaatattattaacagatcgaaattttaata
cttctttttttgaccctgctggtgggggggatcctattttatttcaacattta
>SMNKARA09036_Robertus_lividus_8y48E_48y97N_ad_m_A_Theridiidae
ctttatatttgatttttggggtgtgatcagctatagttggtacagctatgagtgtcctaa
ttcgggtagaattaggacaatctggaagattgttaggggatgatcaattatataatgtaa
ttgtaactgctcatgcttttgtaataattttttttatagtaatacctattataattgggg
ggtttggaaattgattagttcctttaatattaggggctccagatatagctttccctcgaa
taaataatttaagattttgattattacctccttctttatttctattatttatttcttcta
tagttgaaataggagtaggtgctgggtgaacaatttatcctcctttatcttctttagagg
gtcattcaggaagatcagttgattttgctattttttctcttcatcttgcaggtgcttctt
ctattataggggctgtaaattttatttctactattttaaatatacgtgtgtatggaatat
ctatagaaaaagttactttatttgtatgatcagttttaattactgctattcttttattat
tatcgttacctgttttagcaggagctattactatattattaactgatcgaaattttaata
cttctttttttgatccctctggagggggagatccaattttatttcaacattta
>SMNKARA09037_Diplostyla_concolor_8y48E_48y97N_ad_m_A_Linyphiidae
ctttatatttaatttttggggcttgatctgctatagtgggaacggctataagagtattaa
ttcgaattgagttaggtcaaacaggtagaatattaggagatgatcatttatataatgtta
ttgttacggcgcatgcgtttgttataattttttttatagttatacctattttgattgggg
gatttggaaattggttagttcctttaatattaggggctcctgatatagcttttcctcgaa
tgaataatttaagtttttgacttcttcctccttctctttttatactatttgtatcttcta
tagttgagataggtgtaggggctggatgaacagtttaccctcctttggcttctttagagg
ggcactcgggaagtgctgtagattttgctattttttctttgcatttagcaggagcttcat
ctattataggagctattaattttatttcaactattttaaatatgcgttcttatgaaataa
gtatagaaaaagtttcgctttttgtgtgatctgtattaattactgcggttttgttacttt
tgtctttacctgtattagcaggagctattactatattattaactgatcggaattttaata
cttctttctttgatccggcaggtggaggggatccagttctttttcaacattta
>SMNKARA09038_Diplocephalus_picinus_8y48E_48y97N_ad_m_A_Linyphiidae
gtttatattttatttttggggcttgggctgctatagttggaacagcgataagagttttaa
ttcggattgagttaggtcaaactggaagattattgggggatgatcaattatataatgtta
ttgttacagctcatgcatttgttataattttttttatagtaatacctattttgattgggg
ggtttgggaattggttagttcctcttatgttaggggcaccggatatagcttttcctcgta
taaacaatttaagtttttgattattacctccttccttatttttgttatttatttctagaa
tagatgagataggagttggggcaggatggactgtgtatccgccgttagcatctttagatg
ggcatccgggtagatcagttgattttgcaattttttctttacatctagctggagcatctt
caattataggggctattaattttatttctactattttaaacatacgggggtatgggatat
ctatagatagggttcctttatttgtttggtctgtcttaattactgctattttattacttt
tgtctttaccagtattagcgggggcgattacgatacttttaacagatcgtaattttaata
cttcattttttgacccttctggaggaggggatcctgttctatttcaacactta
>SMNKARA09039_Diplocephalus_picinus_8y48E_48y97N_ad_f_A_Linyphiidae
gtttatattttatttttggggcttgggctgctatagttggaacagcgataagagttttaa
ttcggattgagttaggtcaaactggaagattattgggggatgatcaattatataatgtta
ttgttacagctcatgcatttgttataattttttttatagtaatacctattttgattgggg
ggtttgggaattggttagttcctcttatgttaggggcaccggatatagcttttcctcgta
taaacaatttaagtttttgattattacctccttccttatttttgttatttatttctagaa
tagatgagataggagttggggcaggatggactgtgtatccgccgttagcatctttagatg
ggcatccgggtagatcagttgattttgcaattttttctttacatctagctggagcatctt
caattataggggctattaattttatttctactattttaaacatagcggggtatgggatat
ctatagatagggttcctttatttgtttggtctgtcttaattactgctattttattacttt
tgtctttaccagtattagcgggggcgattacgatacttttaacagatcgtaattttaata
cttcattttttgacccttctggaggaggggatcctgttctatttcaacactta
>SMNKARA09040_Maso_sundevalli_8y48E_48y97N_ad_m_A_Linyphiidae
gtttatattttgtgtttggtgcgtgagctgccatagtgggtacggcgatgagagtattaa
ttcgaattgagttgggacagactggtagattattaggggatgaccagttgtataacgtta
ttgttactgctcatgcttttgttatgattttttttatggttatacctattttaattgggg
ggtttgggaattggttagtaccgttgatgttgggagctccagatatagctttcccccgca
taaacaacttgagattttgattgttgcccccttctttattattattatttatttctagaa
tagatgagataggggtgggggcaggttgaactgtttatccaccgcttgcttctttagagg
ggcattctgggagttcagtagattttgctattttttctcttcatttagctggggcatcgt
ctattatgggggctattaattttatttctactattattaatatgcggggttatggtataa
ctatagaaaaggtccccttatttgtatggtctgtattaattacagcagtattattgttgt
tatctttgccagttttagcaggagcgattactatgcttttaacagatcgaaactttaata
cttctttttttgaccctgcgggaggaggggatcctgttttgtttcaacactta
>SMNKARA09041_Maso_sundevalli_8y48E_48y97N_ad_m_A_Linyphiidae
gtttatattttgtgtttggtgcgtgagctgccatagtgggtacggcgatgagagtattaa
ttcgaattgagttgggacagactggtagattattaggggatgaccagttgtataacgtta
ttgttactgctcatgcttttgttatgattttttttatggttatacctattttaattgggg
ggtttgggaattggttagtaccgttgatgttgggagctccagatatagctttcccccgca
taaacaacttgagattttgattgttgcccccttctttattattattatttatttctagaa
tagatgagataggggtgggggcaggttgaactgtttatccaccgcttgcttctttagagg
ggcattctgggagttcagtagattttgctattttttctcttcatttagctggggcatcgt
ctattatgggggctattaattttatttctactattattaatatgcggggttatggtataa
ctatagaaaaggtccccttatttgtatggtctgtattaattacagcagtattattgttgt
tatctttgccagttttagcaggagcgattactatgcttttaacagatcgaaactttaata
cttctttttttgaccctgcgggaggaggggatcctgttttgtttcaacactta
>SMNKARA09042_Maso_sundevalli_8y48E_48y97N_ad_m_A_Linyphiidae
gtttatattttgtgtttggtgcgtgagctgccatagtgggtacggcgatgagagtattaa
ttcgaattgagttgggacagactggtagattattaggggatgaccagttgtataacgtta
ttgttactgctcatgcttttgttatgattttttttatggttatacctattttaattgggg
ggtttgggaattggttagtaccgttgatgttgggagctccagatatagctttcccccgca
taaacaacttgagattttgattgttgcccccttctttattattattatttatttctagaa
tagatgagataggggtgggggcaggttgaactgtttatccaccgcttgcttctttagagg
ggcattctgggagttcagtagattttgctattttttctcttcatttagctggggcatcgt
ctattatgggggctattaattttatttctactattattaatatgcggggttatggtataa
ctatagaaaaggtccccttatttgtatggtctgtattaattacagcagtattattgttgt
tatctttgccagttttagcaggagcgattactatgcttttaacagatcgaaactttaata
cttctttttttgaccctgcgggaggaggggatcctgttttgtttcaacactta
>SMNKARA09044_Trachyzelotes_pedestris_8y48E_48y97N_ad_m_A_Gnaphosidae
ctttgtatttattgtttggttcatgagctgctatggttggtactgcaataagagtattaa
ttcgaatagaattaggtcaatctggtagattgattggtgatgatcatttgtataatgtta
ttgttactgctcatgcgtttgtaataattttttttatagttatgccaattataattggtg
gatttggaaattgattgattcctttaatattaggtgctcctgatatagcatttcctcgaa
tgaataacttgagtttttgattattacctccttcgttaataatattatttatttcttcaa
tagttgaaataggtgttggggctggttgaactgtttaccctccattggcttctaatatag
gtcatgcggggagagctatagattttgctattttttctttgcacttggcaggagcatctt
ctattataggagcaattaattttatttctactgtaattaacatgcgttctattggtataa
agatagaaatgattcctttgtttgtatgatcagtatttattacagcggtgttattattat
tatccttacctgttttagcaggtgctattactatgttactgactgatcgaaattttaata
cttcattttttgacccagcagggggtggggatcctattttatttcaacatttg
>SMNKARA09046_Zora_spinimana_8y48E_48y97N_ad_m_A_Miturgidae
ctttgtatttaatttttggagtttgatctgctatagtaggaactgctataagaatattaa
ttcgtatagaattaggacaagttggaagatttatgggggatgatcatttatataatgtaa
ttgttaccgctcatgcgtttgttataattttttttatagttatgcctattatgattgggg
gattcggaaattggttgattcctttaatgttaggagctcctgatatagcttttcctcgaa
taaataatttaagattttgattattacctccttctttattattattatttatttcttcta
tagttgaaataggagttggagctgggtgaacagtttatcctcctttagcttctgtaatag
gtcattctggaagagccatagattttgctattttttctttacatttagctggtgcttcat
ctattataggggctattaattttatcactactgtaattaatatacgatctattggaataa
ctatagaaaagattcctttgtttgtatgatcagttgcaattactgctgttcttttattat
tatctttaccagtattagctggtgctattactatattattgactgatcgtaattttaata
cttctttttttgatcctgcggggggaggagatccaattttgtttcaacattta
>SMNKARA09048_Euryopis_flavomaculata_8y48E_48y97N_ad_m_A_Theridiidae
ctttatatttattatttggagcttgatctgctatagtaggaacagctataagtgtaataa
ttcgaattgaattaggtcaatctggaagatttttgggagatgatcaattatataatgtag
tagttacagcacatgcttttattataattttttttatagttatgcctattttaattggag
gatttggaaattgattaattcctttaatattaggagctccagatatagcttttcctcgaa
taaataatttaagattttggttacttcctccttcattaatattattatttatttcttcaa
tagttgaaataggggtaggagcaggatgaactgtttatcctcctttatcttctttagaag
ggcatgcaggtagttctgtagattttgctattttttctttacatttagctggtgcttctt
caattataggagctattaattttatctctacagtaataaatatacgtttattaggcataa
gttatgataaggtatctttatttgtttgatcagtaattattactgcagtattattattat
tatcattacctgtattagcaggtgctattactatacttttaactgatcgaaattttaata
cttctttttttgaccctgctggaggtggtgatcctattttatttcagcatttg
>SMNKARA09049_Micrargus_subaequalis_8y48E_48y97N_ad_f_A_Linyphiidae
gtttatattttatttttggagcttgggctgctatggtagggacagcaatgagagtattaa
ttcgaattgagttaggccaaacaggtagattgttaggggatgaccaattgtataatgttg
ttgtaactgctcatgcttttgtaataattttttttatagtaatacctattttaattgggg
gatttggaaattggctgattcctttaatgttaggagctcctgatatagcttttcctcgga
taaataatttaagattttgattactgcccccttctttattattactgtttgtttctagaa
tagatgaaataggagttggagctggatgaactatttatccacctcttgcttcgttagaag
ggcattctgggagatcagtagattttgctattttttctttacatttagctggagcatcat
ctattataggggctattaattttacttctactattattaatatacgaggatatgggatat
ctatagaaaagattcctttatttgtatgatctgtactgattactgctattttattgcttt
tatctttacctgttttagcaggggcaattacaatgcttttaacagatcgtaattttaata
catcattttttgatccttctggaggtggggatcctgttttatttcagcattta
>SMNKARA09050_Tenuiphantes_flavipes_8y48E_48y97N_ad_m_A_Linyphiidae
ctttatattttatttttggagcgtgagctgctatagtaggaactgctataagagtattaa
ttcggattgaattggggcaaactggaagaatactgggggatgaccagttgtataatgtta
ttgtaactgcacatgcttttgtaataattttttttatagttatacctattttgattggag
gattcggtaattgattagttcctttaatactaggggctcctgatatagcttttcctcgta
taaataatttaagattttgacttttacccccttctctattattattatttatttcaagta
tagttgagatgggagttggggcagggtggacagtgtatccgcctcttgcctctttagagg
gacatgcaggaagttctgttgattttgctattttttctttacatttagctggggcttctt
ctattataggggcaattaattttatttccactattattaatatgcgtggatacggtgtat
caatggaaaaggttccgttatttgtatgatctgttttaattactgcggttcttttgttgt
tatcattacctgttttagctggtgctattactatacttttaactgatcgaaattttaata
cttcgttttttgatcctgcaggaggaggagatcctgtgttatttcaacattta
>SMNKARA09051_Pardosa_prativaga_8y48E_48y97N_ad_m_A_Lycosidae
ctttatatttaatgtttggagtttgatcagctataataggaactgctataagagtgttaa
ttcgaatagaattaggaaatcctggaagattattaggtgatgatcatttgtataatgtta
tagttactgctcatgcttttgtaataattttttttatagtaataccaattcttattggag
gttttgggaattgattggttcctttaatgttaggagctccagatatatcatttcctcgaa
taaataatctttctttttgattattacctccttctttatttttattatctatatcttcta
tagtagaaataggggttggtgctgggtgaactgtttatcctcctttagcatctacagttg
gtcatataggaaattcaatagattttgctattttttctcttcatttggctggggcttctt
ctattataggggctgtgaattttatttctactattattaatatacgaatattaggtatat
cttttgaaaaggttcctctttttgtttgatcagttttaattacagcagtattattattac
tttctttacctgtattagcaggtgctattactatattattaacagatcgaaattttaata
cttctttttttgatcctgctggtggaggggatcctattttatttcaacattta
>SMNKARA09052_Trachyzelotes_pedestris_8y48E_48y97N_ad_m_A_Gnaphosidae
nnnnnnnnnnnnnnnnnnnntcatgagctgctatggttggtactgcaataagagtattaa
ttcgaatagaattaggtcaatctggtagattgattggtgatgatcatttgtataatgtta
ttgttactgctcatgcgtttgtaataattttttttatagttatgccaattataattggtg
gatttggaaattgattgattcctttaatattaggtgctcctgatatagcatttcctcgaa
tgaataacttgagtttttgattattacctccttcgttaataatattatttatttcttcaa
tagttgaaataggtgttggggctggttgaactgtttaccctccattggcttctaatatag
gtcatgcggggagagctatagattttgctattttttctttgcacttggcaggagcatctt
ctattataggagcaattaattttatttctactgtaattaacatgcgttctattggtataa
agatagaaatgattcctttgtttgtatgatcagtatttattacagcggtgttattattat
tatccttacctgttttagcaggtgctattactatgttactgactgatcgaaattttaata
ctnnnnnnnnnnnnnnnnnnnnnnnnnnnnnnnnnnnnnnnnnnnnnnnnnnn
>SMNKARA09053_Tenuiphantes_flavipes_8y48E_48y97N_ad_f_A_Linyphiidae
ctttatattttatttttggagcgtgagctgctatagtaggaactgctataagagtattaa
ttcggattgaattggggcaaactggaagaatactgggggatgaccagttgtataatgtta
ttgtaactgcacatgcttttgtaataattttttttatagttatacctattttgattggag
gattcggtaattgattagttcctttaatactaggggctcctgatatagcttttcctcgta
taaataatttaagattttgacttttacccccttctctattattattatttatttcaagta
tagttgagatgggagttggggcagggtggacagtgtatccgcctcttgcctctttagagg
gacatgcaggaagttctgttgattttgctattttttctttacatttagctggggcttctt
ctattataggggcaattaattttatttccactattattaatatgcgtggatacggtgtat
caatggaaaaggttccgttatttgtatgatctgttttaattactgcggttcttttgttgt
tatcattacctgttttagctggtgctattactatacttttaactgatcgaaattttaata
cttcgttttttgatcctgcaggaggaggagatcctgtgttatttcaacattta
>SMNKARA09054_Drassyllus_pusillus_8y48E_48y97N_ad_f_A_Gnaphosidae
ctttatatttattatttggttcatgagctgctatggtggggactgctataagtgttttaa
ttcgtatagaattaggtcaatctggaagatttataggtgatgatcaattatataatgtga
ttgtaactgctcatgcatttgttataattttttttatagttataccaattttaattggtg
ggtttggaaattgattagttcctttgatgttaggtgctcctgatatggcatttcctcgaa
taaataatttaagtttttgattattacctccttcgttgatgttattatttatttcttcaa
tagtagaaataggggttggtgctggttgaactgtatatccgccattggcttctaatgtag
gacattcaggaagagctatggattttgctattttttctttacatttagcaggagcttctt
ctattatgggagctgtaaattttatttctactgtaattaatatgcgttctattgggataa
aaatagaaaggattcctttgtttgtgtgatcagtacttatcactgctgtattattattat
tgtcattacctgtgttagcaggtgctattactatgctgttgactgatcgtaattttaata
cttcgttttttgatccagcaggtgggggagacccaattttatttcagcattta
>SMNKARA09056_Agyneta_mollis_8y48E_48y97N_ad_m_A_Linyphiidae
gcttatattttatttttggagcctgagcggctatagttggtacggcaataagagtattaa
ttcgaattgagttaggtcaaactggtagattattaggtgatgaccaattatataatgtta
ttgtaacagcccacgcttttgttataatttttttcatggttataccaattttaattggtg
gttttggtaattggttggtgcccttaatattaggggctcctgatatagcatttcctcgta
taaataatttgagattttggttattaccaccctctttatttttactttttatttctagta
tagatgaaataggagtaggtacaggttgaactgtgtatcctcctattgcttctttggaag
gtcatgctggtagatctgttgattttgctattttttctttacacttggcgggagcttctt
caatcataggggctattaattttatttctactattttaaatatacgagggtatggaataa
ctatagaaaaagtccccctatttgtttggtctgttcttattacagctgtcttattattat
tgtctttacctgtattagcaggggctattactatattgttaactgatcgtaattttaata
cctcattctttgatcccgccgggggaggggatccagttttatttcaacatttg
>SMNKARA09057_Dicymbium_nigrum_8y48E_48y97N_ad_m_A_Linyphiidae
nnnnntattttatttttggggcatgggctgctatagtaggtacagcaataagagtattaa
ttcgaattgagttgggtcagactggaagattattaggtgatgatcaattatataatgtaa
ttgttactgcgcatgcgtttgttataattttttttatagtaatacctattttaattgggg
gatttggaaactgattggttcctttaatattaggagcaccggatatagctttcccccgca
taaataatttaagtttttgattattaccaccttctctgttattattatttatctctagaa
tggatgagataggggttggggcaggttgaactgtgtttcccccccttgcttctttagaag
ggcaccctggaagatcagtagattttgcaattttttctttacacttagctggggcgtctt
caattataggggctattaattttatttctactattttaaatatacgtgggtatgggataa
ctatggataaggtccctttatttgtttgatctgttttgattactgctgtcttattacttt
tatctttgccagttttagcaggggctattactatgcttttaacagatcgaaattttaata
cttcattttttgacccttctnnnnnnnnnnnnnnnnnnnnnnnnnnnnnnnnn
>SMNKARA09058_Diplostyla_concolor_8y48E_48y97N_ad_f_A_Linyphiidae
ctttatatttaatttttggggcttgatctgctatagtgggaacggctataagagtattaa
ttcgaattgagttaggtcaaacaggtagaatattaggagatgatcatttatataatgtta
ttgttacggcgcatgcgtttgttataattttttttatagttatacctattttgattgggg
gatttggaaattggttagttcctttaatattaggggctcctgatatagcttttcctcgaa
tgaataatttaagtttttgacttcttcctccttctctttttatactatttgtatcttcta
tagttgagataggtgtaggggctggatgaacagtttaccctcctttggcttctttagagg
ggcactcgggaagtgctgtagattttgctattttttctttgcatttagcaggagcttcat
ctattataggagctattaattttatttcaactattttaaatatgcgttcttatgaaataa
gtatagaaaaagtttcgctttttgtgtgatctgtattaattactgcggttttgttacttt
tgtctttacctgtattagcaggagctattaccatattattaactgatcggaattttaata
cttctttctttgatccggcaggtggaggggatccaattctttttcaacattta
>SMNKARA09059_Diplostyla_concolor_8y48E_48y97N_ad_f_A_Linyphiidae
ctttatatttaatttttggggcttgatctgctatagtgggaacggctataagagtattaa
ttcgaattgagttaggtcaaacaggtagaatattaggagatgatcatttatataatgtta
ttgttacggcgcatgcgtttgttataattttttttatagttatacctattttgattgggg
gatttggaaattggttagttcctttaatattaggggctcctgatatagcttttcctcgaa
tgaataatttaagtttttgacttcttcctccttctctttttatactatttgtatcttcta
tagttgagataggtgtaggggctggatgaacagtttaccctcctttggcttctttagagg
ggcactcgggaagtgctgtagattttgctattttttctttgcatttagcaggagcttcat
ctattataggagctattaattttatttcaactattttaaatatgcgttcttatgaaataa
gtatagaaaaagtttcgctttttgtgtgatctgtgttaattactgcggttttgttacttt
tgtctttacctgtattagcaggagctattactatattattaactgatcggaattttaata
cttctttctttgatccggcaggtggaggggatccagttctttttcaacattta
>SMNKARA09060_Pardosa_prativaga_8y48E_48y97N_ad_m_A_Lycosidae
ctttatatttaatgtttggagtttgatcagctataataggaactgctataagagtgttaa
ttcgaatagaattaggaaatcctggaagattattaggtgatgatcatttgtataatgtta
tagttactgctcatgcttttgtaataattttttttatagtaataccaattcttattggag
gttttgggaattgattggttcctttaatattaggagctccagatatatcatttcctcgaa
taaataatctttctttttgattattacctccttctttatttttattatctatatcttcta
tagtagaaataggggttggtgctgggtgaactgtttatcctcctttagcatctacagttg
gtcatataggaaattcaatagattttgctattttttctcttcatttggctggggcttctt
ctattataggggctgtgaattttatttctactattattaatatacgaatattaggtatat
cttttgaaaaggttcctctttttgtttgatcagttttaattacagcagtattattattac
tttctttacctgtattatcgggtgctattactatattattaacagatcgaaattttaata
cttctttttttgatcctgctggtggaggagatcctattttatttcaacattta
>SMNKARA09061_Zora_spinimana_8y48E_48y97N_ad_m_A_Miturgidae
ctttgtatttaatttttggagtttgatctgctatagtaggaactgctataagaatattaa
ttcgtatagaattaggacaagttggaagatttatgggggatgatcatttatataatgtaa
ttgttaccgctcatgcgtttgttataattttttttatagttatgcctattatgattgggg
gattcggaaattggttgattcctttaatgttaggagctcctgatatagcttttcctcgaa
taaataatttaagattttgattattgcctccttctttattattattatttatttcttcta
tagttgaaataggggttggagctgggtgaacagtttatcctcctttagcttctgtaatag
gtcattctggaagagccatagattttgctattttttctttacatttagctggtgcttcat
ctattataggagctattaattttatcactactgtaattaatatacgatctattggaataa
ctatagaaaagattcctttgtttgtatgatcagttgcaattactgctgttcttttattat
tatctttaccagtattagctggtgctattactatattattgactgatcgtaattttaata
cttctttttttgatcctgcggggggaggagatccaattttgtttcaacattta
>SMNKARA09062_Zelotes_latreillei_8y48E_48y97N_ad_m_A_Gnaphosidae
ctttatatttattatttggttcatgggctgctatggtaggaactgctataagagtattaa
ttcgtatagaattaggtcaacctggaagatttataggtgatgatcatttatataatgtta
ttgtgactgctcatgcatttgttatgattttttttatggttatacctattttaattggtg
ggtttggaaattgattagttcctttgatactgggggctccagatatagcatttcctcgta
taaataatttgagtttttgactactacctccttcattaatgttattatttatttcgtcta
tggtagaaataggagtaggtgctggttgaactgtatatccacctttggcttcgaatatag
gtcattcgggaatagccatggattttgctattttttctttacatttagcgggtgcttcgt
ctattataggagcaattaattttatttctactgtaattaatatgcgttctattggaataa
gtatggaaaaggttcctttgtttgtatgatcagtatttattactgcggtgttattgttat
tatctttacctgtattagcaggtgctattactatattattaactgatcgtaattttaata
cttcgttttttgaccctgctgggggaggggatcctattttatttcaacattta
>SMNKARA09063_Agyneta_affinis_8y48E_48y97N_ad_m_A_Linyphiidae
gtttatattttatttttggagcttgagcggctatagttggtacagcaataagagtattaa
ttcgtattgagttaggacaaacgggtagattattaggtgatgatcagttgtataatgtta
ttgtaacagcccatgcttttgttataattttttttatagttataccaattttaattggtg
gatttggaaattggttggttcctttaatgttaggagcccctgatatagcttttcctcgta
taaataatttgagattttgattattaccaccttctttatttttactttttatctctagta
tagatgaaataggagttgggacagggtgaactgtttatccccctattgcttctttagagg
ggcatgccggtagatctgttgattttgccattttttctttacacttggctggggcttcgt
caattataggggctattaattttatttctactattttaaatatgcggggttacggtataa
cgttagaaaaagttcctttatttgtttggtctgttcttattacagctgttttattgctgt
tatctttacctgttttagctggtgctattactatgttgttaactgatcgtaattttaata
catcattttttgatccgtcggggggaggagatccggtcttatttcaacattta
>SMNKARA09064_Agyneta_mollis_8y48E_48y97N_ad_f_A_Linyphiidae
gcttatattttatttttggagcctgagcggctatagttggtacggcaataagagtattaa
ttcgaattgagttaggtcaaactggtagattattaggtgatgaccaattatataatgtta
ttgtaacagcccacgcttttgttataatttttttcatggttataccaattttaattggtg
gttttggtaattggttggtgcccttaatattaggggctcctgatatagcatttcctcgta
taaataatttgagattttggttattaccaccctctttatttttactttttatttctagta
tagatgaaataggagtaggtacaggttgaactgtgtatcctcctattgcttctttggaag
gtcatgctggtagatctgttgattttgctattttttctttacacttggcgggagcttctt
caatcataggggctattaattttatttctactattttaaatatacgagggtatggaataa
ctatagaaaaagtccccctatttgtttggtctgttcttattacagctgtcttattattat
tgtctttacctgtattagcaggggctattactatattgttaactgatcgtaattttaata
cctcattctttgatcccgccgggggaggggatccagttttatttcaacatttg
>SMNKARA09065_Apostenus_fuscus_8y48E_48y97N_ad_m_A_Liocranidae
cattgtatttattatttggagcttgatctgcaatagttggtactgctataagagtattaa
ttcgtatagaattaggacaatcaggaagtttattaggtgatgatcatttatataatgtag
tagtaactgctcatgcttttgttatgattttttttatagtaataccaattttaattggtg
gatttggtaattgattagttccattaatattaggagctcctgatatagcatttcctcgaa
taaataatttaagtttttgattattacctccatctttgtttttattatttatatcttcta
tagttgaaataggagttggtgctggatgaactgtatatcctcctttagcatctaatgttg
gacatataggaagagcaatagattttgctattttttctttacatttagctggtgcttctt
caattatgggagctattaattttatttctactattattaatatacgatctattggaatga
gtatagaaaaagttcctctatttgtgtgatcagttttaattacagcaattttgttattat
tatcattacctgtattagcaggtgctattactatattattaacagatcgtaattttaata
cttctttttttgatcctgctggtggtggagatcctgtattatttcaacattta
>SMNKARA09066_Ozyptila_simplex_8y48E_48y97N_ad_f_A_Thomisidae
ctttatatttattatttggtgcttgatcagcaatagttggaactgcaataagagttttaa
ttcgaatagaattaggaaatgtgggaagattattaggaaatgatcatttatataatgtgg
ttgttacagctcatgcttttgttataattttttttatagtaatgccaattttgattggag
gttttggaaattggctagttcccttaatattaggggccccagatatatcatttcctcgta
taaataatttgtctttttgattactacctccttcattatttttattgtttatatcttcta
tagttgaaataggagtaggggcagggtgaactgtttatcctcctttggcttctagaattg
gtcatataggaagatctatagattttgctattttttctcttcatttagcaggtgcttctt
ctattataggagctgttaattttattactactattattaatatacgttctgttgggataa
caatagaaaaggttcctttatttgtttggtcagtattaattacagctattttattgcttt
tatcattacctgttttagcaggagcgattacaatgttattaacagatcgaaattttaata
cttctttttttgatcctgctgggggaggggatcctattttatttcaacattta
>SMNKARA09067_Drassyllus_lutetianus_8y48E_48y97N_ad_m_A_Gnaphosidae
ctttatatttattgtttggttcatgggctgctatggtggggactgctataagtgtactaa
ttcgtatagaattaggtcaatctggaagatttataggtgatgatcaattatataatgtaa
ttgtaactgctcatgcatttgttataattttttttatagttataccaattttgattggtg
gatttggaaattggttagtacctttgatattaggggctcctgatatagcatttcctcgaa
taaataatttgagtttttgattattacctccttcgttgatattattatttatttcttcaa
tagtagagatgggggttggtgctggttgaactatttacccgcctttggcttctaatgtgg
gtcattcgggaggagctatggattttgctattttttctttacatttagcgggggcctctt
ctattatgggagctgtaaattttatctctactgtaattaatatgcgttctgttggaataa
aaatagaaagggttcctttatttgtatgatcagtacttattactgctgtattattattat
tatcattacctgtgttagcaggtgctattactatattgttaactgatcggaattttaata
cgtcgttttttgacccagcaggtgggggggatccaattttatttcagcattta
>SMNKARA09068_Zodarion_italicum_8y48E_48y97N_ad_f_A_Zodariidae
cattgtatttaatttttggtgcttgatctgcaataataggaacagcaataagagtattga
ttcggagagagttgggtcaatctggtggtttgattggagatgatcaaatttataatgtaa
ttgttactgcccatgcgtttgtaataattttttttatagtaatacctattctgattggag
gatttggaaattggttagttcctttaatattaggtgctcctgatatagcttttcctcgaa
taaataatttaagattttgattattacctccttcattaatattgttaatgatttcttcta
tagtagaagtaggtgtaggggcagggtgaactatttaccctcctttggcttcattagttg
gacatataggaagatcagtagattttgctattttttctttacatttagctggagcttcat
caattataggtgctattaattttattactactattataaatatacgttcgtgtggaataa
gaatagaaaaagttcctttatttgtatgatcagtgttaattactgctgtattattattat
tatcttttcctgtgttagcaggtgctattactatgttattaacagatcgaaattttaata
cttcattttttgaccctgctggagggggggatcctattttatttcaacattta
>SMNKARA09069_Diplostyla_concolor_8y48E_48y97N_ad_m_A_Linyphiidae
ctttatatttaatttttggggcttgatctgctatagtgggaacggctataagagtattaa
ttcgaattgagttaggtcaaacaggtagaatattaggagatgatcatttatataatgtta
ttgttacggcgcatgcgtttgttataattttttttatagttatacctattttgattgggg
gatttggaaattggttagttcctttaatattaggggctcctgatatagcttttcctcgaa
tgaataatttaagtttttgacttcttcctccttctctttttatactatttgtatcttcta
tagttgagataggtgtaggggctggatgaacagtttaccctcctttggcttctttagagg
ggcactcgggaagtgctgtagattttgctattttttctttgcatttagcaggagcttcat
ctattataggagctattaattttatttcaactattttaaatatgcgttcttatgaaataa
gtatagaaaaagtttcgctttttgtgtgatctgtattaattactgcggttttgttacttt
tgtctttacctgtattagcaggagctattaccatattattaactgatcggaattttaata
cttctttctttgatccggcaggtggaggggatccagttctttttcaacattta
>SMNKARA09070_Pardosa_prativaga_8y48E_48y97N_ad_f_A_Lycosidae
ctttatatttaatgtttggagtttgatcagctataataggaactgctataagagtgttaa
ttcgaatagaattaggaaatcctggaagattattaggtgatgatcatttgtataatgtta
tagttactgctcatgcttttgtaataattttttttatagtgataccaattcttattggag
gttttgggaattgattggttcctttaatattaggagctccagatatatcatttcctcgaa
taaataatctttctttttgattattacctccttctttatttttattatctatatcttcta
tagtagaaataggggttggtgctgggtgaactgtttatcctcctttagcatctacagttg
gtcatataggaaattcaatagattttgctattttttctcttcatttggctggggcttctt
ctattataggggctgtgaattttatttctactattattaatatacgaatattaggtatat
catttgaaaaggttcctctttttgtttgatcagttttaattacagcagtattattattac
tttctttacctgtattagcaggtgctattactatattattaacagatcgaaattttaata
cttctttttttgatcctgctggtggaggggatcctattttatttcaacattta
>SMNKARA09071_Pardosa_saltans_8y48E_48y97N_ad_m_A_Lycosidae
ctttatatttaatatttggagtttgatcggctataatagggactgctataagagtattaa
ttcgaatagaattaggaaatcctgggagattattaggtgatgatcatttatataatgtta
tagttactgctcatgcttttgtaataattttttttatagtgataccaattcttattggag
gttttgggaattgattaattcctttaatattaggagctccagatatatcatttcctcgaa
taaataatctttctttttgattattacctccttctttatttttattatctatatcttcta
tagtggagataggagttggtgctggatgaactgtttatcctcctttagcatctacggttg
gtcatataggaagttcaatagattttgctattttttctcttcatttggctggagcttctt
ctattataggggctgtaaattttatttctactattataaatatacggataataggaatat
ctttagaaaaagttcctctttttgtttgatcagttttaattacagcagtattattattac
tttctttacctgttttagcaggtgctattactatattattaacagatcgaaattttaata
cttctttttttgatcctgctggtggaggagatcctattttatttcaacattta
>SMNKARA09072_Drassyllus_lutetianus_8y48E_48y97N_ad_m_A_Gnaphosidae
ctttatatttattgtttggttcatgggctgctatggtggggactgctataagtgtattaa
ttcgtatagaattaggtcaatctggaagatttataggtgatgatcaattatataatgtaa
ttgtaactgctcatgcatttgttataattttttttatagttataccaattttgattggtg
gatttggaaattggttagtacctttgatattaggggctcctgatatagcatttcctcgaa
taaataatttgagtttttgattattacctccttcgttgatattattatttatttcttcaa
tagtagagataggggttggtgctggttgaactatttacccgcctttggcttctaatgtgg
gtcattcgggaggagctatggattttgctattttttctttacatttagcgggggcttctt
ctattatgggggctgtaaattttatctctactgtaattaatatgcgttctgttggaataa
aaatagaaagggttcctttatttgtatgatcagtacttattactgctgtattattattat
tatcattacctgtgttagcaggtgctattactatattgttaactgatcggaattttaata
cgtcgttttttgatccagcaggtgggggggatccaattttatttcagcattta
>SMNKARA09073_Micrargus_subaequalis_8y48E_48y97N_ad_f_A_Linyphiidae
gtttatattttatttttggagcttgggctgctatggtagggacagcaatgagagtattaa
ttcgaattgagttaggccaaacaggtagattgttaggggatgaccaattgtataatgttg
ttgtaactgctcatgcttttgtaataattttttttatagtaatacctattttaattgggg
gatttggaaattggctgattcctttaatgttaggagctcctgatatagcttttcctcgga
taaataatttaagattttgattactgcctccttctttattattactgtttgtttctagaa
tagatgaaataggagttggagctggatgaactatttatccacctcttgcttcgttagaag
ggcattctgggagatcagtagattttgctattttttctttacatttagctggagtatcat
ctattataggggctattaattttatttctactattattaatatacgaggatatgggatat
ctatagaaaagattcctttatttgtatgatctgtactgattactgctattgtattgcttt
tatctttacctgttttagcaggggcaattacaatgcttttaacagatcgtaattttaata
catcattttttgatccttctggaggtggggatcctgttttatttcagcattta
>SMNKARA09074_Agyneta_mollis_8y48E_48y97N_ad_m_A_Linyphiidae
gcttatattttatttttggagcctgagcggctatagttggtacggcaataagagtattaa
ttcgaattgagttaggtcaaactggtagattattaggtgatgaccaattatataatgtta
ttgtaacagcccacgcttttgttataatttttttcatggttataccaattttaattggtg
gttttggtaattggttggtgcccttaatattaggggctcctgatatagcatttcctcgta
taaataatttgagattttggttattaccaccctctttatttttactttttatttctagta
tagatgaaataggagtaggtacaggttgaactgtgtatcctcctattgcttctttggaag
gtcatgctggtagatctgttgattttgctattttttctttacacttggcgggagcttctt
caatcataggggctattaattttatttctactattttaaatatacgagggtatggaataa
ctatagaaaaagtccccctatttgtttggtctgttcttattacagctgtcttattattat
tgtctttacctgtattagcaggggctattactatattgttaactgatcgtaattttaata
cctcattctttgatcccgccgggggaggggatccagttttatttcaacatttg
>SMNKARA09075_Dicymbium_nigrum_8y48E_48y97N_ad_f_A_Linyphiidae
gtttatattttatttttggggcatgggctgctatagtaggtacagcaataagagtattaa
ttcgaattgagttgggtcagactggaagattattaggtgatgatcaattatataatgtaa
ttgttactgcgcatgcgtttgttataattttttttatagtaatacctattttaattgggg
gatttggaaactgattggttcctttaatattaggagcaccggatatagctttcccccgca
taaataatttaagtttttgattattaccaccttctctgttattattatttatctctagaa
tggatgagataggggttggggcaggttgaactgtgtatcccccccttgcttctttagaag
ggcaccctggaagatcagtagattttgcaattttttctttacacttagctggggcgtctt
caattataggggctattaattttatttctactattttaaatatacgtgggtatgggataa
ctatggataaggtccctttatttgtttgatctgttttgattactgctgtcttattacttt
tatctttgccagttttagcaggggctattactatgcttttaacagatcgaaattttaata
cttcattttttgacccttctggggggggggatcctgttctatttcagcattta
>SMNKARA09076_Drassyllus_praeficus_8y48E_48y97N_ad_m_A_Gnaphosidae
ctttatatttattatttggatcatgggctgctatggtgggaactgctataagtgtattaa
ttcgtatagaattaggacaatctggaagatttataggtgatgatcagttatataatgtaa
ttgtaactgctcatgcatttgtaataattttttttatagttataccaattttgattggtg
gatttggaaattggttggttcctttaatattaggtgcacctgatatagcatttcctcgga
taaataatttgagtttttgattattacctccttcattaatattattatttatttcttcga
tggtagagataggggtaggggcaggttggactgtatatccgcctttagcttctaatatgg
gtcatgcaggaagagcgatggattttgctattttttctttgcatttagcaggagcttctt
ctattataggggctgtaaattttatttctactgtaattaatatacgttctattggtatga
gaatggaaaaggttcctttgtttgtgtgatcggtatttattactgctgtattgttattat
tatcattacctgtattagcaggtgctattactatgttgttgactgatcgaaattttaata
cttcgttttttgaccctgcaggtggaggggatccaattttatttcaacattta
>SMNKARA09077_Walckenaeria_dysderoides_8y48E_48y97N_ad_f_A_Linyphiidae
gcttatattttatttttggggcttgggctgctatggtagggacagcaataagagtattga
ttcgaattgagttagggcaaactggtagcttattaggggatgatcaactatataatgtta
ttgttactgctcatgcttttgttataattttctttatagtgatacctattttgattgggg
gatttgggaattggttaattcctttaatattaggggctccagatatagcttttcctcgta
taaataatttaagattttggttgttacccccctctttattattattatttatttctagta
tggatgagataggggtaggggcaggatgaactgtttatcctcctcttgcttctttggaag
ggcactctggtagatcggtggattttgctattttttctttacacttagctggggcttcat
caattatgggggctattaattttatttctactatttttaatatacggggatgtggcataa
ctatagaaaaggttcctttatttgtttgatctgtgttgattacagctgtattgctattat
tatcttttccggttttagcaggggctattactatacttttaacagatcgtaattttaata
cgtcattttttgatccttctgggggaggggatcctgttttgtttcaacattta
>SMNKARA09078_Trochosa_ruricola_8y48E_48y97N_ad_m_A_Lycosidae
ctttatatctaatatttggtgcatgatctgctatagtgggaactgctataagagtgttga
ttcgtttagaattaggaaattctggaagtttattaggagatgatcatttatataatgtta
tagttactgctcatgcttttgtgatgattttttttatagtaatgccaattcttattggag
gttttggtaattgattaattcctttaatgttaggtgctcctgatatatcatttcctcgaa
taaataatctttctttttggttattacccccttctttatttttattaactatgtcttcta
tagtggaaataggggtgggagctggttgaacagtttatcctcctttagcatctagaatag
gtcatatagggagttctatagattttgctattttttctcttcatttagctggtgcttctt
ctattataggggctgtaaattttatttctactattattaatatacgaatgttaggtatat
ctatggatagggtacctttatttgtttggtcagttttgattacggctgttttattattac
tatctttacctgttttagcaggtgctattactatgttattaactgatcgaaattttaata
cttctttttttgatcctgcagggggaggagaccctattttatttcaacatttg
>SMNKARA09079_Micaria_pulicaria_8y48E_48y97N_ad_m_A_Gnaphosidae
cattatatttgatttttggagcttgagctgctatggtaggaacagcaatgagagtgttga
ttcgaatagagttaggacaatctggtagatttttaggggatgatcatttatataatgtta
ttgtaacggctcatgcttttgttatgattttttttatagttatacctattatgattggtg
gttttggtaattgattagtacctttaatattaggagcacctgacatggcttttcctcgta
taaataatttaagtttttgattactccctccttcattaattttattatttatttcttcta
tagtggaaataggtgtaggtgctggatgaactgtttatcctcctcttgcttctagtatag
gacatgctggaagtgctatggattttgctattttttctttacatttagctggagcttctt
ctattataggagctattaattttatttctactattattaatatacgattagttggtataa
gtatagaaaagattcctttgtttgtgtgatcagtatttattactgctattttgttattat
tatcattacctgtattagcgggtgctattacaatattgttaactgatcgaaattttaata
cttctttttttgatcctgcaggaggaggagatccgattttatttcaacattta
>SMNKARA09080_Pellenes_tripunctatus_9y48E_48y36N_ad_m_A_Salticidae
cattatatttaatttttggagtttgggctgcaatagtaggaactgctataagaatattaa
ttcgaatggaattaggtcaggttggtagatttttaggtaatgatcatttgtataatgtta
ttgttacagctcatgcttttgtaataattttttttatagtaatacctattttaattggtg
gttttggaaattgattggttcctttaatgttaggagctcctgatatagcttttcctcgaa
taaataatttaagtttttgattattacctccttctttaatattattatttatttcttcaa
tagtagaaataggagttggggctgggtgaacagtttatcctccgttggcttctgtagtag
ggcatggggggagatctgtagattttgctattttttctcttcatttagctggtgcttcat
caattataggagctgttaattttatttctactgttattaatatacgttcttttggaataa
ctatagataaagttcctttatttgtttgatctgtaataattacggctgttttattattat
tatctcttcctgttttagcaggagctattactatactattaactgatcgaaattttaata
catctttttttgatcctgcaggagggggagatccaattttatttcaacattta
>SMNKARA09081_Filistata_insidiatrix_8y48E_48y97N_ad_f_A_Filistatidae
cattgtatctaatttttggggtatgatctgctatattgggtacagcgttgagagtgttga
ttcgcttggaactaggacaggtggggagattgataggggatgatcagctatataatgtaa
tcgtgactgcacacgcgttagtaatgattttttttatggttatacctattttaattggtg
gttttggaaattggatgctgcctttaatgttaggggcccctgatatagcatttccccgaa
taaataatttgagattttggttgttacctccttctttggtattgcttttgatttcttcta
tggtggatgtaggggtaggagcaggctgaactatttatccccctttatcttcaagaattg
ggcatggtggtttgtctgttgattttgctattttttcgttgcatttagcgggggcatcct
ctattatgggggctattaattttatttctacaattgttaatatgcgtactaacgggttgt
ctatagatagggtgccgttgtttgcttgatcagttcttgttacgacggtacttttattgg
tgtctttaccagtattagctggtgctattaccatattattgactgatcgtaattttaata
catcttttttcgatccagcggggggtggtgatccgattttatttcagcatttg
>SMNKARA09082_Lepthyphantes_leprosus_8y48E_48y97N_ad_m_A_Linyphiidae
ccttatattttatttttggggcttggtctgctatagtagggactgctataagagtattaa
ttcgaattgagttagggcaaacaggaagaatgctaggtgatgatcaggtgtataatgtaa
ttgtaacagctcatgcatttgtaataattttttttatagttataccaattttaattgggg
gatttggaaattggttagttcctttaatgcttggggcgccagatatagcttttccacgta
taaataatttaagattttgacttcttcctccttctcttttgttgttatttatctcaagaa
tagttgaaataggggtaggggcaggatgaacagtttatccccctcttgcttctttagaag
gacatgctggaagatctgtggattttgctattttttctcttcatttagctggagcttctt
ctattatgggggcgattaattttatttctacaattattaacatacgggggtacggaatat
ctttagaaaaaattcctttatttgtgtgatcagttttgattacagctgttttattattat
tatctttgcctgttttagcaggagcgattacaatgttgttaactgatcgtaattttaata
cttcttttttcgacccagcagggggtggggaccctgtactatttcaacattta
>SMNKARA09083_Tmarus_piger_3y08E_44y18N_ad_f_A_Thomisidae
ctttatatttattatttggagcgtgatcagctatagtgggaactgctataagagtattga
ttcgaatagaattaggtaattcgggaagacttcttggaaatgatcatttatataatgtaa
ttgtaactgctcatgcttttgtaataattttttttatagttatacctattttaattggag
gttttggtaactgattagtacctttgatattaggagctcctgatatatcttttcctcgaa
taaataatttatctttttggttgttacctccttctttgtttttattatttatatcttcta
tagtagaaataggagtaggggctggatgaactgtgtatccacctttggcttctagtttag
gtcatataggaagatcaatagattttgctattttttctcttcatttggctggggtttctt
caattataggggctgtaaattttatttctactattattaatatacgaagaacaggaataa
ctatagaaaaggtgcctttatttgtctggtcagtgttaattactgctattttgcttttat
tatcattacctgttttagcaggagctattactatactattaacagatcggaattttaata
catcgttttttgatcctgctggaggaggggatccaattttatttcaacattta
>SMNKARA09084_Alopecosa_barbipes_2y76E_45y12N_ad_f_A_Lycosidae
ctttgtatttgttattaggtgtttggtcagctataatagggactgctatatcagttttaa
ttcgaatagaattaggtaatcctggaagtttattgggagatgatcatttatataatgtta
tagttactgctcatgcttttgtaataattttttttatagtaataccaattcttattggtg
gatttggaaattgattagttcctttaatgttaggggctcctgatatatcttttcctcgaa
taaataatctttctttttggttgttacctccttctttatttttgttgtgtatatcttcta
tggtagaaataggagtaggagctggttgaactgtttatcctcctttagcgtcaagaatag
gtcatactggaagttctatggattttgcaattttttctcttcatttagctggggcttctt
ctattataggtgcagtaaattttatttctactattattaatatacggatattgggaatgt
caatagagaaggttcctttatttgtttgatcagttttaattacggctgttttattattac
tttctttacctgttttagcaggtgctattactatgttattgactgatcgtaattttaata
cttctttttttgatcctgcaggaggaggagatcctattttatttcaacattta
>SMNKARA09085_Pardosa_bifasciata_9y55E_48y36N_ad_m_A_Lycosidae
ctttatatttaatatttggagtttgatcagctataataggaactgctataagagtattaa
ttcgaatagaattaggaaaccctggaagattattaggagatgatcatttatataatgtta
tagttactgctcatgcttttgtaatgattttttttatagtgataccaattcttattggag
gttttggaaattgattagttcctttaatattaggagctccagatatatcatttcctcgaa
tgaataatctttctttttggcttttacctccttctttatttctattgtctatgtcttcta
tagtagaaataggggttggtgctggatgaactgtttatcctcctttagcgtctacagttg
gtcatataggaaattcaatagattttgctattttttctcttcatttagctggggcttctt
ctattataggtgctgtgaattttatttctactattattaatatacgaatattaggaatat
ctatagaaaaagttcctctttttgtttgatcggttttaattacagcagtgttattattac
tttctttacctgttttagcaggtgctattactatattattaacggatcgtaattttaata
cttctttttttgatcctgctggtgggggggatcctattttatttcaacattta
>SMNKARA09086_Pardosa_bifasciata_9y55E_48y36N_ad_m_A_Lycosidae
ctttatatttaatatttggagtttgatcagctataataggaactgctataagagtattaa
ttcgaatagaattaggaaatcctggaagattattaggagatgatcatttatataatgtta
tagttactgctcatgcttttgtaatgattttttttatagtgataccaattcttattggag
gttttggaaattgattagttcctttaatattaggagttccagatatatcatttcctcgaa
tgaataatctttctttttggcttttacctccttctttatttttattgtctatgtcttcta
tagtagaaataggggttggtgctggatgaactgtttatcctcctttagcgtctacagttg
gtcatataggaaattcaatagattttgctattttttctcttcatttagctggggcttctt
ctattataggtgctgtgaattttatttctactattattaatatacgaatattaggaatat
ctatagaaaaagttcctctttttgtttgatctgttttaattacagcagtgttattattac
tttctttacctgttttagcaggtgctattactatattattaacggatcgtaattttaata
cttctttttttgatcctgctggtgggggggatcctattttatttcaacattta
>SMNKARA09087_Pardosa_bifasciata_9y55E_48y36N_ad_m_A_Lycosidae
ctttatatttaatatttggagtttgatcagctataataggaactgctataagagtattaa
ttcgaatagaattaggaaaccctggaagattattaggagatgatcatttatataatgtta
tagttactgctcatgcttttgtaatgattttttttatagtgataccaattcttattggag
gttttggaaattgattagttcctttaatattaggagctccagatatatcatttcctcgaa
tgaataatctttctttttggcttttacctccttctttatttctattgtctatgtcttcta
tagtagaaataggggttggtgctggatgaactgtttatcctcctttagcgtctacagttg
gtcatataggaaattcaatagattttgctattttttctcttcatttagctggggcttctt
ctattataggtgctgtgaattttatttctactattattaatatacgaatattaggaatat
ctatagaaaaagttcctctttttgtttgatcggttttaattacagcagtgttattattac
tttctttacctgttttagcaggtgctattactatattattaacggatcgtaattttaata
cttctttttttgatcctgctggtgggggggatcctattttatttcaacattta
>SMNKARA09088_Asagena_phalerata_9y55E_48y36N_ad_m_A_Theridiidae
ctttatatttattatttggggcttgatctgctatagtaggcacagctataagagttttaa
ttcgggtggagttagggcaaccaggaaggttactaggagatgatcaattgtataatgtca
ttgtaaccggtcatgcgtttattatgattttctttatagtaatgcctattttaattggag
gttttggaaattggttagttcctttaatattaggggctcctgatatggcttttcctcgaa
taaataatttaagtttttgattattacctccttctttaatacttttgtttatctcttcta
tggaagagataggagtaggagcaggatggactatttatcctcctttatcttctttagaag
gtcatagaggaagatctgtagattttgctattttttctttacatttagctggggcttctt
ctattataggggctattaattttatttctacaattttaaatatacgtttgtttgggataa
ctatagaaaaggttagattgtttgtttggtctgtattgatcactgctgtattattattat
tatctttgcctgttttagcgggggctattaccatattacttactgatcgcaattttaata
cttctttttttgatcctgctggagggggggatcctattttatttcaacatttg
>SMNKARA09089_Tenuiphantes_flavipes_8y58E_48y9N_ad_f_A_Linyphiidae
ctttatattttatttttggagcgtgagctgctatagtaggaactgctataagagtattaa
ttcggattgaattggggcaaactggaagaatactgggggatgaccagttgtataatgtta
ttgtaactgcacatgcttttgtaataattttttttatagttatacctattttgattggag
gattcggtaattgattagttcctttaatactaggggctcctgatatagcttttcctcgta
taaataatttaagattttgacttttacccccttctctattattattatttatttcaagta
tagttgagatgggagttggggcagggtggacagtgtatccgcctcttgcctctttagagg
gacatgcaggaagttctgttgattttgctattttttctttacatttagctggggcttctt
ctattataggggcaattaattttatttccactattattaatatgcgtggatacggtgtat
caatggaaaaggttccgttatttgtatgatctgttttaattactgcggttcttttgttgt
tatcattacctgttttagctggtgctattactatacttttaactgatcgaaattttaata
cttcgttttttgatcctgcaggaggaggagatcctgtgttatttcaacattta
>SMNKARA09091_Microneta_viaria_8y58E_48y9N_ad_f_A_Linyphiidae
gtttatattttgtatttggggcttggtctgcgatagttggaacggcaataagagtattaa
ttcgagttgagttaggtcaagttggtagtttgttaggagatgatcaattatataatgtaa
ttgttacggctcacgcttttgttataattttttttatagtgataccaattttaattgggg
gatttggtaattggttagttcctttaatattaggggctccagatatagctttccctcgga
taaataatttgagattttgacttttacccccctctttatttttattgtttatttcaagta
tagatgagataggggtaggggcaggttggacagtttatcctcctctttcttcattagatg
ggcattcggggagttcagtggattttgctattttttctttacatttagctggggcatctt
ctattatgggggctattaattttatttctactattttaaatatacgagggtatgggataa
gcatagatagggttcctttatttgtttggtctgtattaattacggctgttcttttattgt
tatctttgccagtgttagcaggggcgattacgatgttgttaacagatcgaaatttcaata
catcattttttgatcctgctggagggggggatcctgttttgtttcaacactta
>SMNKARA09092_Microneta_viaria_8y58E_48y9N_ad_f_A_Linyphiidae
gtttatattttgtatttggggcttggtctgcgatagttggaacggcaataagagtattaa
ttcgagttgagttaggtcaagttggtagtttgttaggggatgaccaattatataatgtaa
ttgttacggctcacgcctttgttataattttttttatagtgataccaattttaattgggg
gatttggtaattggttagttcctttaatattaggggctccagatatagctttccctcgga
taaataatttgagattttgacttttacccccctctttatttttattgtttatttcaagta
tagatgagataggggtaggggcaggttggacagtttatcctcctctttcttcattagatg
gtcattcggggagttcagtggattttgctattttttctttacatttagctggggcatctt
ctattatgggggctattaattttatttctactattttaaatatacgagggtatgggataa
gcatagatagggttcctttatttgtttggtctgtattaattacggctgttcttttattgt
tatctttgccagtgttagcaggggcgattacgatgttgttaacagatcgaaatttcaata
catcattttttgatcctgctggagggggggatcctgttttgtttcagcactta
>SMNKARA09094_Microneta_viaria_8y58E_48y9N_ad_f_A_Linyphiidae
gtttatattttgtatttggggcttggtctgcgatagttggaacggcaataagagtattaa
ttcgagttgagttaggtcaagttggtagtttgttaggagatgatcaattatataatgtaa
ttgttacggctcatgcttttgttataattttttttatagtgataccaattttaattgggg
gatttggtaattggttagttcctttaatattaggggctccagatatagctttccctcgga
taaataatttgagattttgacttttacccccctctttatttttattgtttatttcaagta
tagatgagataggggtaggggcaggttggacagtttatcctcctctttcttcattagatg
ggcattcggggagttcagtggattttgctattttttctttacatttagctggggcatctt
ctattatgggggctattaattttatttctactattttaaatatacgagggtatgggataa
gcatagatagggttcctttatttgtttggtctgtattaattacggctgttcttttattgt
tatctttgccagtgttagcaggggcgattacgatgttgttaacagatcgaaatttcaata
catcattttttgatcctgctggagggggggatcctgttttgtttcaacactta
>SMNKARA09095_Macrargus_rufus_8y58E_48y9N_ad_f_A_Linyphiidae
gtttatattttgtttttggggcctgagctgcaatagtagggacggcaataagagtgttaa
ttcgagttgagttagggcaaattggtagattgttaggagatgatcagttatataatgtga
ttgtaactgctcatgcttttgttatgattttttttatagttatgcctatcttaattggtg
gatttgggaattggttagttccattaatattgggggctcctgacatagcttttccgcgaa
taaataatttaagattttggcttttacccccttctttattattgttatttatctcaagaa
tagacgaaataggggtgggggcaggatgaacagtttatcctcctcttgcttctttagagg
gtcattctggtagatcagtagattttgctatcttttctttacacttagctggagcttctt
ctattataggggctattaattttatttctactattttaaatatacgaggggttggaataa
ctatggagaaggttcctttatttgtctgatctgtgttaattacggctgtattattattat
tatcattaccagttttggctggagctattactatattattaactgatcgaaattttaata
cctctttttttgatccttctggaggtggagatcctgttctatttcagcactta
>SMNKARA09097_Nuctenea_umbratica_8y48E_48y97N_ad_m_A_Araneidae
ctttatacttgatttttggtgcttgagctgctatagtgggcactgcgatgagagttttaa
ttcgagttgaattaggacaatcaggaagatttattggggatgatcaattgtataatgtaa
ttgtaacagctcatgcatttgtaataattttttttatagtaatacctattttaattgggg
ggtttggaaattggttagttccattaatattaggagctccagatatagcttttcctcgaa
taaataatttaagattttgattactccccccttcattatttttattaattgtttcatcta
tagtagaaataggagtaggggccggatgaactgtatatcctcctttagctagattagagg
gtcatgctggaagatctgtagattttgctattttttcattacatttagctggggcttctt
caattataggagcaattaattttatttctacaattattaatatacgattttatggaataa
ctatagaaaaagttcctttatttgtttggtcagtattaattacggctgtgttattacttc
tttctttacccgttttagcaggagctattacaatattattaacagatcgaaattttaata
catctttttttgacccttctgggggaggggatcctattttatttcagcattta
>SMNKARA09098_Heliophanus_dampfi_8y22E_48y55N_ad_f_A_Salticidae
ctttatatttaatttttggagcgtgatctgctatagtaggaactgcaatgagagttttaa
ttcggatggaattaggtcaaactggtagatttttaggtaatgaccatatatataatgtaa
ttgtgacagcacatgcttttgttataatttttttcatagtaatgccaattttgattggtg
ggtttggtaattgattagtccctttgatattaggagctcctgatatggcttttcctcgaa
tgaataatttaagtttttgattgttacctccttcgttaatattattatttatttcttcta
tggctgaaataggagttggagcggggtgaactgtttatcctcctttagcttccattattg
gtcataatggaagttctgttgattttgcgattttttctttgcatttggctggagcttctt
ctattataggagctattaattttatttctacggttattaatatacgttctgttggtatga
gattagataaggttcctttatttgtatgatctgtggtgattacggctgtgttattattat
tatctttacctgtattagctggtgctattactatattattgacagatcgtaattttaata
cttcattttttgatcctgctggtgggggtgatcctattttatttcaacattta
>SMNKARA09099_Frontinellina_frutetorum_3y08E_44y18N_ad_f_A_Linyphiidae
ctttatattttatttttggggcatgggctgctatagtgggtacaggcataagagttttga
ttcgaattgaattagggcaaactggaagattacttggtgatgatcagctttataatgtta
ttgtaacagcacatgcttttgtaataattttttttatagttatacctattttaattgggg
gatttggaaattggttggttcctttgatgttaggggctcctgatatagcttttcctcgaa
tgaataatttaagattttggcttcttcctccttcattgtttttgttgtttatttcttcaa
tgtcagaaataggtgtaggagctgggtgaacagtttatccccctttatcatctttagagg
gacattctggtagatcggttgattttgcaattttttctttacatttagctggagcttcat
ctattataggggctattaattttatttctacaattttaaatatgcgaagttatggtgttt
ctatggataaaatttccctttttgtttgatcagttttaatcactgctgtccttttacttt
tatctctacctgttttggcgggggctatcactatattattaacggatcgtaattttaata
cttctttttttgacccagctgggggaggggatcctattttatttcagcattta
>SMNKARA10000_Frontinellina_frutetorum_3y08E_44y18N_ad_m_A_Linyphiidae
ctttatattttatttttggggcatgggctgctatagtgggtacagccataagagttttga
ttcgaattgaattagggcaaactggaagattacttggagatgatcagctttataatgtta
ttgtaacagcacatgcttttgtaataattttttttatagtaatacctattttaattgggg
gatttggaaattggttggttcctttgatgttaggggttcctgatatagcttttcctcgaa
tgaataatttaagattttggcttcttcctccttcattgtttttgttgtttatttcttcaa
tgtcagaaataggtgtaggagctgggtgaacagtttatccccctttatcatctttagagg
gacattctggtagatcggttgattttgcaattttttctttacatttagctggagcttcat
ctattataggggctattaattttatttctacaattttaaatatgcgaagttatggcgttt
ctatggataaaatttccctttttgtttgatcagttttaatcactgctgtcctcttgcttt
tatctttacctgttttggcgggggctatcactatattattaacggatcgtaattttaata
cttctttttttgatccagctgggggaggggatcctattttatttcagcattta
>SMNKARA10001_Frontinellina_frutetorum_3y08E_44y18N_ad_m_A_Linyphiidae
ctttatattttatttttggggcatgggctgctatagtgggtacagccataagagttttga
ttcgaattgaattagggcaaactggaagattacttggtgatgatcagctttataatgtta
ttgtaacagcacatgcttttgtaataattttttttatagtaatacctattttaattgggg
gatttggaaattggttggttcctttgatgttaggggctcctgatatagcttttcctcgaa
tgaataatttaagattttggcttcttcctccttcattgtttttgttgtttatttcttcaa
tgtcagaaataggtgtaggagctgggtgaacagtttatccccctttatcatctttagagg
gacattctggtagatcggttgattttgcaattttttctttacatttagctggagcttcat
ctattataggggctattaattttatttctacaattttaaatatgcgaagttatggcgttt
ctatggataaaatttccctttttgtttgatcagttttaatcactgctgtccttttacttt
tatctctacctgttttggcgggggctatcactatattattaacggatcgtaattttaata
cttctttttttgacccagctgggggaggggatcctattttatttcagcattta
>SMNKARA10002_Frontinellina_frutetorum_3y08E_44y18N_ad_f_A_Linyphiidae
ctttatattttatttttggggcatgggctgctatagtgggtacaggcataagagttttga
ttcgaattgaattagggcaaactggaagattacttggtgatgatcagctttataatgtta
ttgtaacagcacatgcttttgtaataattttttttatagttatacctattttaattgggg
gatttggaaattggttggttcctttgatgttaggggctcctgatatagcttttcctcgaa
tgaataatttaagattttggcttcttcctccttcattgtttttgttgtttatttcttcaa
tgtcagaaataggtgtaggagctgggtgaacagtttatccccctttatcatctttagagg
gacattctggtagatcggttgattttgcaattttttctttacatttagctggagcttcat
ctattataggggctattaattttatttctacaattttaaatatgcgaagttatggtgttt
ctatggataaaatttccctttttgtttgatcagttttaatcactgctgtccttttacttt
tatctctacctgttttggcgggggctatcactatattattaacggatcgtaattttaata
cttctttttttgacccagctgggggaggggatcctattttatttcagcattta
>SMNKARA10003_Cnephalocotes_obscurus_8y58E_48y89N_ad_m_A_Linyphiidae
gcttatattttatttttggggcttgggctgctatggtaggaacagcaataagtgtattaa
ttcgggttgagttaggtcaaactggaagattactaggggatgatcagctatataatgtta
ttgtcactgctcatgcttttgttataattttttttatagttatacctattttgattggtg
gttttgggaattgactggtccctttgatattgggggcccctgatatagctttcccgcgca
taaataatttgagattttgattgttacccccatctttgtttatgttgtttatctctagaa
tggatgagataggggttggggccggatgaactatttatcctcctcttgcctctttagagg
gacatgccggtagttcagtggattttgctattttttctttacacttagccggggcatctt
ctattatgggggctattaattttatttctactattataaatatacgcggatgtggaataa
ctatagagaaggttcctttatttgtatgatctgttttaatcacagctgtattattattat
tatctttaccagttttggcgggggctattacaatgcttttaacagatcgaaattttaata
cgtctttttttgacccggctggggggggggatcctgttttatttcaacacttg
>SMNKARA10006_Araniella_alpica_8y22E_48y55N_ad_f_A_Araneidae
ctttgtatttaatctttggggcttgggcggctatagttgggactgccatgagagtattaa
ttcgggtagaattgggtcagtcaggaaggtttcttggggatgaccagttatataatgtaa
ttgtcacagcacacgcgtttgttataattttttttatggttataccaattttgattggtg
gttttggaaactgattagttcctctaatattgggagcgcctgatatagcatttccacgga
taaataatttaagattttgattattacccccttctttatttttgttaattatttcttcaa
tagtagaaataggggtgggagcgggttgaactgtgtatccccctctagccgggctagaag
gacatgcggggaggtctgttgattttgccattttttctcttcatctagctggggcttctt
ccattatgggggctattaattttatttctactattattaatatacggttttacggaataa
gaatagaaaaggtgcctttgtttgtatggtctgttcttattacggcggttttattacttt
tatcacttcctgtgttggcaggggctattacgatattattaactgatcgaaattttaata
cttctttttttgacccatcaggagggggggatcctatcttatttcagcattta
>SMNKARA10007_Araniella_alpica_8y22E_48y55N_ad_f_A_Araneidae
ctttgtatttaatctttggggcttgggcggctatagttgggactgccatgagagtattaa
ttcgggtagaattgggtcagtcaggaaggtttcttggggatgaccagttatataatgtaa
ttgtcacagcacacgcgtttgttataattttttttatggttataccaattttgattggtg
gttttggaaactgattagttcctctaatattgggagcgcctgatatagcatttccacgga
taaataatttaagattttgattattacccccttctttatttttgttaattatttcttcaa
tagtagaaataggggtgggagcgggttgaactgtgtatccccctctagccgggctagaag
gacatgcggggaggtctgttgattttgccattttttctcttcatctagctggggcttctt
ccattatgggggctattaattttatttctactattattaatatacggttttacggaataa
gaatagaaaaggtgcctttgtttgtatggtctgttcttattacggcggttttattacttt
tatcacttcctgtgttggcaggggctattacgatattattaactgatcgaaattttaata
cttctttttttgacccatcaggagggggggatcctatcttatttcagcattta
>SMNKARA10008_Araniella_cucurbitina_8y22E_48y55N_ad_m_A_Araneidae
ctttatatttgatttttggggcttgggcagccatagttggaactgcaataagagtattaa
ttcgagttgaattagggcaatcagggagatttctcggggatgaccaattgtataatgtaa
ttgttacagcacacgcatttgttataattttttttatagtaatacctattttaattggag
gatttggtaattgactagtcccgttaatgttaggagctccggatatagcatttcctcgta
taaataatttaagattttgattattacctccttctttatttttattaattatttcttcaa
tagtagaaataggggttggggctggttgaacagtttacccccctctagccgggctagagg
gacatgctgggagttctgtagattttgctattttctctcttcatttggctggggcatctt
ctattataggggctattaattttatttctactattattaatatgcgtttttatggaataa
gaatagaaaaggttcctttatttgtttgatctgttcttattacagctgttttattacttt
tatcacttccggtattagccggggctattactatattattgactgatcgaaattttaata
cctctttttttgacccgtctgggggtggggatcctattttatttcaacattta
>SMNKARA10009_Araniella_cucurbitina_8y22E_48y55N_ad_m_A_Araneidae
ctttatatttgatttttggggcttgggcagccatagttggaactgcaataagagtattaa
ttcgagttgaattagggcaatcagggagatttctcggggatgaccaattgtataatgtaa
ttgttacagcacacgcatttgttataattttttttatagtaatacctattttaattggag
gatttggtaattgactagtcccgttaatgttaggagctccggatatagcatttcctcgta
taaataatttaagattttgattattacctccttctttatttttattaattatttcttcaa
tagtagaaataggggttggggctggttgaacagtttacccccctctagccgggctagagg
gacatgctgggagttctgtagattttgctattttctctcttcatttggctggggcatctt
ctattataggggctattaattttatttctactattattaatatgcgtttttatggaataa
gaatagaaaaggttcctttatttgtttgatctgttcttattacagctgttttattacttt
tatcacttccggtattagccggggctattactatattattgactgatcgaaattttaata
cctctttttttgacccgtctgggggtggggatcctattttatttcaacattta
>SMNKARA10010_Araniella_cucurbitina_8y22E_48y55N_ad_m_A_Araneidae
ctttatatttgatttttggggcttgggcagccatagttggaactgcaataagagtattaa
ttcgagttgaattagggcaatctgggagatttctcggggatgaccaattgtataatgtaa
ttgttacagcacacgcatttgttataattttttttatagtaatacctattttaattggag
ggtttggtaattgattagtcccgttaatgttaggagctccggatatagcatttcctcgta
taaataatttaagattttgattattacccccttctttatttttattaattatttcttcaa
tagtagaaataggggttggggctggttgaacagtttacccccctctagccgggctagagg
gacatgctgggagttctgtagattttgctattttctctcttcatttagctggggcatctt
ctattataggggctattaattttatttctactattattaatatgcggttttatgggataa
gaatagaaaaggtccctttatttgtttgatctgttcttattacagctgttttattacttt
tatcacttccggtattagccggggctattactatattattgactgatcgaaattttaata
cctctttttttgacccgtctgggggtggggatcctattttatttcaacattta
>SMNKARA10011_Hypsosinga_sanguinea_8y22E_48y55N_ad_m_A_Araneidae
ctttatatttaatttttggtgcttgagcggctatagttggtacggctataagagttttaa
ttcgaattgaattaggtcagtctgggaggtttttaggagatgatcagctttataatgtaa
ttgttacagctcatgcatttgtaataattttttttatagtaatacctattttgattgggg
gatttggaaattgattagttccattaatattaggggcgccagatatggcatttcctcgaa
taaataatttaaggttttgattattaccaccttctttatttttattaattatttcttcaa
tggtcgaaatgggagttgggtctggttgaacagtatatcccccattagcaagtttagagg
gtcatgctggtagatctgtagattttgctattttttctcttcatttagctggggcttctt
ctattataggagcaattaattttatttctactattattaatatacgattttatggaataa
ctatagaaaaggttcccttgtttgtttgatctgttttaattactgcggttttattacttc
tttctttaccagtattagcaggtgcaattactatattattaacagatcgaaattttaata
cttcattttttgatccttctggggggggagatcctattttgtttcaacattta
>SMNKARA10012_Hypsosinga_sanguinea_8y22E_48y51N_ad_m_A_Araneidae
ctttatatttaatttttggtgcttgagcggctatagttggtacggctataagagttttaa
ttcgaattgaattaggtcagtctgggaggtttttaggagatgatcagctttataatgtaa
ttgttacagctcatgcatttgtaataattttttttatagtaatacctattttgattgggg
gatttggaaattgattagttccattaatattaggggcgccagatatggcatttcctcgaa
taaataatttaaggttttgattattaccaccttctttatttttattaattatttcttcaa
tggtcgaaatgggagttgggtctggttgaacagtatatcccccattagcaagtttagagg
gtcatgctggtagatctgtagattttgctattttttctcttcatttagctggggcttctt
ctattataggagcaattaattttatttctactattattaatatacgattttatggaataa
ctatagaaaaggttcccttgtttgtttgatctgttttaattactgcggttttattacttc
tttctttaccagtattagcaggtgcaattactatattattaacagatcgaaattttaata
cttcattttttgatccttctggggggggagatcctattttgtttcaacattta
>SMNKARA10013_Phylloneta_sisyphia_8y22E_48y55N_ad_f_A_Theridiidae
ctttatatttaatttttggggcttgagctgcaatagtgggaacaggaataagagtattaa
ttcgaattgaattaggtcaaattggaagatttttgggaaatgatcatctttataatgtaa
ttgtaacagctcatgcttttgtaataattttttttatagtaatacctattttaattggtg
gatttggaaattgattagttccattaatattaggagctcctgatatagcatttcctcgaa
taaataatttaagtttttgattattacctctttctttatttttattatttatttcttcta
tagtagaaataggagtagggtctggatgaacagtgtatccaccattatcatctttagatg
gacatagaggaagatctgttgattttgctattttttctcttcatttagctggtgcttcat
cgattataggagctgtaaattttatttctacagtattaaatatacgatctaatagaatat
ctatagaaaaaatttcattatttgtgtgatcagtattgattactgctgtattattattat
tatctttacctgttttagcaggtgcaattactatattattaactgatcgaaattttaata
cttctttttttgatccagctggaggaggagatcctattttatttcaacattta
>SMNKARA10014_Phylloneta_sisyphia_8y22E_48y55N_ad_m_A_Theridiidae
ctttatatttaatttttggggcttgagctgcaatagtgggaacaggaataagagtattaa
ttcgaattgaattaggtcaaattggaagatttttgggaaatgatcatctttataatgtaa
ttgtaacagctcatgcttttgtaataattttttttatagtaatacctattttaattggtg
gatttggaaattgattagttccattaatattaggagctcctgatatagcatttcctcgaa
taaataatttaagtttttgattattacctccttctttatttttattatttatttcttcta
tagtagaaataggagtagggtctggatgaacagtgtatccaccattatcatctttagatg
gacatagaggaagatctgttgattttgctattttttctcttcatttagctggtgcttcat
cgattataggagctgtaaattttatttctacagtattaaatatacgatctaatagaatat
ctatagaaaaaatttcattatttgtgtgatcagtattgattactgctgtattattattgt
tatctttacctgttttagcaggtgcaattactatattattaactgatcgaaattttaata
cttctttttttgatccagctggaggaggagatcctattttatttcaacattta
>SMNKARA10015_Philodromus_aureolus_8y22E_48y55N_ad_m_A_Philodromidae
cattatatttaatttttggagcatgagcagcaatagttgggacagcaataagagtattaa
ttcgaatagaattaggtcaagtaggaaaatttttaggtgatgatcatttatataatgtaa
ttgtaactgcacatgcatttgttataattttttttatagtaatacctattttgattggtg
ggtttggtaattgattggtacctttaatattaggtgcaccagatatggcttttcctcgaa
tgaacaatttaagtttttgactacttcccccatcgttattattattatttatttcttcta
tagtagagataggggttggaactggttgaacagtttatcctcctttggcttcaataacag
gtcatgcgggtagtgcagttgattttgctattttctcgttacatttagcaggtgcatctt
ctattataggttctattaattttatttctactattattaatatacgatctagtgggataa
agatagataaagttcctttatttgtatgatctgttataattactactgtattattattat
tatcattaccagtattagcaggtgctattactatacttttaacagatcggaattttaata
catctttttttgatcctgctgggggaggagatcctattttatttcaacattta
>SMNKARA9314_Cetonana_laticeps_9y79E_48y81N_ad_m_A_Trachelidae
ctttatatttaatttttggggcttgatctgctatggtaggaacagctataagtgtattaa
ttcgaatagaattaggacaatcaggtagattgttaggggatgaccatttatataatgtta
ttgttactgctcatgcttttgttataattttttttatagtaatacctattttaattggtg
gatttggaaactgattagttcctttaatattaggagctccagatatggcttttcctcgaa
taaataatttaagtttttgattattacctccttctttaatgttattgtttgtatcttcaa
tagctgaaataggagtgggagctggttgaacagtatatcctcctttagcttcaaatatag
gacattctggatttgctatagattttgctattttttctttgcatttagcaggagcttctt
caattataggagctgttaattttatttctactattattaatatacggtctattggaataa
gaatagagaaggttcctttatttgtttgatctgtatttattactgctattttattattat
tatctttacctgtgttggcaggtgcaattactatattattaacagatcgtaattttaata
catctttttttgatccggctggtggaggggatcctatcttatttcaacattta
>SMNKARA9319_Cybaeus_tetricus_8y32E_47y87N_ad_f_A_Cybaeidae
ctttatattttatatttggtgcttgagctgctatagttgggacttctataagtgtattaa
ttcgaattgagttagggcaatcaggaagatttttaggtgatgatcatttgtataatgtaa
ttgtaactgctcatgcttttgtaataattttttttatagtaatgccagtgttgattggag
gttttggaaattggttggttcctttaatattaggtgctcctgatatggcttttcctcgta
taaataatttaagattttgattattacctccttctttatttttattgtttatttcttcta
tagttgaaataggagtgggagctggttggactatttatcctcctttggcctctagaatag
gtcatagagggagatctgtagattttgctattttttctttacatttagcgggagcttctt
caattataggagctattaattttatttctactgtttttaatatacgaggtgtagggataa
caatagaaaaggtacctttatttgtatgatctattttaattactgtaattttattattat
tatcattaccagttttagcaggtgctattactatattattaactgatcgtaattttaata
cttctttttttgatcctgctgggggaggagatcctattttatttcaacattta
>SMNKARA9320_Cybaeus_tetricus_8y32E_47y87N_jv_A_Cybaeidae
ctttatattttatatttggtgcttgagctgctatagttgggacttctataagtgtattaa
ttcgaattgagttagggcaatcaggaagatttttaggtgatgatcatttgtataatgtaa
ttgtaactgctcatgcttttgtaataattttttttatagtaatgccagtgttgattggag
gttttggaaattggttggttcctttaatattaggtgctcctgatatggcttttcctcgta
taaataatttaagattttgattattacctccttctttatttttattgtttatttcttcta
tagttgaaataggagtgggagctggttggactatttatcctcctttggcctctagaatag
gtcatagagggagatctgtagattttgctattttttctttacatttagcgggagcttctt
caattataggagctattaattttatttctactgtttttaatatacgaggtgtagggataa
caatagaaaaggtacctttatttgtatgatctattttaattactgtaattttattattat
tatcattaccagttttagcaggtgctattactatattattaactgatcgtaattttaata
cttctttttttgatcctgctgggggaggagatcctattttatttcaacattta
>SMNKARA9326_Parasteatoda_lunata_8y38E_47y84N_ad_f_A_Theridiidae
ctttatatttgatttttggagcttgggctgcaatagtaggaacagcaataagtatattaa
ttcgagtagaattaggtcaaacgggaagatttatgggtgatgatcaattatataatgtaa
ttgtaacggctcatgcttttgttataattttttttatagtaatacctattttaattgggg
gttttgggaattgattggttcccttaatattaggtgctcctgatatagcattccctcgaa
taaataatttgagattttgattattgcctccttctttattattattatttatttcatcaa
tagtagagataggggttggagcaggttgaactgtatatcctcctttatcatctttagatg
gtcatgggggaagatcagtagattttgcaattttttctttacatttggctggggcttctt
ctattataggagcggtaaattttatttctactgtacttaatatacgatcatatggaatga
gaatggaaaaagttcctttatttgtatgatcagtattaattactgctattttgttattat
tatcattacctgtactagcaggtgctattactatgttgttaactgatcgtaattttaata
cttccttttttgaccctgcagggggaggggatcctattctatttcaacatttg
>SMNKARA9329_Tenuiphantes_tenebricola_8y32E_47y87N_ad_f_A_Linyphiidae
ctttatattttatttttggagcgtgagctgctatagtaggaactgctataagagtattaa
ttcgaattgagttgggacaaactggaagtatattgggggatgatcagttgtataatgtta
ttgttactgctcatgcttttgttataattttttttatagttatacctattttaattgggg
gatttggaaattggttagtacctttaatacttggtgcgcctgacatggcttttcctcgaa
taaataatttaagattctggcttttacctccttctttattattattatttatttcaagta
tagttgaaataggagttggagcaggatgaacagtgtatcctccacttgcttctttagaag
gacatgcgggaagctctgtcgattttgctattttttctcttcatttasctggggcttctt
ctattataggascaattaattttatttctactatttttaatatacgtggatatgatgtgt
caatggaaaaggtcccattgtttgtatgatctgttttgattactgctgttcttttattgt
tgtcattacctgttttagcaggcgctattactatacttttaactgaccgaaattttaata
cttctttttttgaccctgcagggggaggggatcccgtgttatttcaacactta
>SMNKARA9330_Tenuiphantes_tenebricola_8y32E_47y87N_ad_f_A_Linyphiidae
ctttatattttatttttggagcgtgagctgctatagtaggaactgctataagagtattaa
ttcgaattgagttgggacaaactggaagtatattgggtgatgatcagttgtataatgtta
ttgttactgctcatgcttttgttataattttttttatagttatacctattttaattgggg
gatttggaaattggttagtacctttaatacttggtgctcctgacatggcttttcctcgaa
taaataatttaagattctggcttttacctccttctttattattattatttatttcaagta
tagttgaaataggagttggagcaggatgaacagtgtatcctccacttgcttctttagaag
gacatgcgggaagctctgtcgattttgctattttttctcttcatttagctggggcttctt
ctattataggagcaattaattttatttctactatttttaatatacgtggatatggtgtat
caatggaaaaggttccattgtttgtatgatctgttttgattactgctgttcttttattgt
tgtcattacctgttttagcaggtgctattactatacttttaactgaccgaaattttaata
cttctttttttgaccctgcagggggaggggatcccgtgttatttcaacactta
>SMNKARA9333_Poeciloneta_variegata_8y38E_47y84N_ad_f_A_Linyphiidae
ctttatattttatttttggggcatgagcttctatagtgggtactgctataagagtattaa
ttcgaatcgagttaggtcagactggaagaatattaggggatgatcaattatataatgtaa
ttgttactgcacatgcttttgttataattttttttatagttatacctattttaattggtg
gatttggaaattggttagtacctttaatgttaggggctccagatatagcttttcctcgta
taaataatctaagattttgattgttacctccttctttattgcttttatttatttcaagaa
taattgaaataggagtgggagcgggatgaactgtgtatcctcctctttcttctttagagg
ggcatgcgggtagtgctgttgattttgctattttttcacttcatttagctggggcatctt
ctattataggagctattaattttatttccactattattaatatgcgggggtatggagttt
ctatggaaaaggtaccactttttgtgtggtctgtattaattacagctattttattacttt
tgtctcttccagttttagcaggagcaattacaatgttattaacggatcgaaattttaata
cttctttttttgatcctgctgggggtggggatccagtattgtttcaacacttg
>SMNKARA9340_Walckenaeria_corniculans_8y32E_47y87N_ad_f_A_Linyphiidae
gtttatattttatttttggggcttgggctgctatagtagggacagcgataagagtattaa
ttcgaattgagttaggacagattggtagtttactgggggatgatcaattatataatgtta
ttgttactgctcatgcttttgttatgattttttttatagtaatacctattttgattgggg
gatttggtaattggttggtgcccctaatgttaggggcaccagatatggcttttcctcgta
taaataatttaagattttgattacttcctccttctttattattattatttatttctagta
tagatgagataggtgtaggagcaggatgaacagtgtatcctccgcttgcttctttggagg
gtcattctgggagttcggtagattttgctattttttctttacatttagctggggcttcat
caattataggggctattaactttatttcgactattttaaatatacggggatatgggataa
ctatggaaagggttccattatttgtgtgatctgttttaattacggctgtgttgttattat
tgtcattacctgttttagcgggtgcgattactatgcttttgacagatcgaaattttaata
catctttttttgatcctgctggaggaggggatccggttttatttcaacattta
>SMNKARA9341_Robertus_scoticus_8y26E_47y86N_ad_f_A_Theridiidae
ctttgtatttaatttttggggtatggtcggctatggttggtacagcaataagagtattaa
ttcgagttgaattaggacaatctggtagattattaggagatgatcaattatataatgtaa
ttgttactgctcatgcttttattataattttttttatagtaatacctattatgattggag
gatttggaaattgattaattcctttgatattaggggctcctgatatagcttttcctcgaa
tgaataatttaagattttgattattacctccttctttatttttattatttatttcttcta
tagtagagataggtgtgggggctggatgaactatttatccacctttgtcttctttagaag
gacattcaggtagatcagttgattttgctattttttctcttcatcttgcaggtgcttctt
ctattataggagctgttaattttatttctactatttttaatatacgtgtatatggtatat
caatagagaaagtgactttatttgtatggtcagttttaattactgctattttattattat
tatcattacctgtattagcaggagctattactatattattaactgatcgaaattttaata
cttctttttttgatccttcaggaggaggtgatccaattttatttcaacattta
>SMNKARA9343_Centromerus_sylvaticus_8y38E_47y84N_ad_f_A_Linyphiidae
gtttatatttaatttttggagcttgggctgctatggttgggactgggataagtgtattga
ttcgtgtagagttagggcaagttggaagaatgttaggggatgatcagttatataatgtta
ttgttactgctcatgcgtttgttataattttttttatggttatacctattttaattgggg
gatttggtaattggttagttcctttaatattaggggcgccagatatggcttttcctcgta
taaataatttaagtttttggttattgccaccatctttgtttttgttatttatttcttcta
tagtagaaataggggtaggggctggatgaactatttatcctccactagcttctttagagg
ggcattctggtagttctgtagattttgctattttttctcttcatttggcgggggcgtcat
ctattataggggcaattaatttcatttctactattattaatatacgtacttatgggatag
ggatagaaagggtctctttatttgtttggtctgtattaattacagcagttttgttgttat
tatcgttgcccgtattagcaggggcaattactatgttgttaacagatcgaaattttaata
cttctttttttgatcctgctgggggaggggatcctatcttgtttcaacattta
>SMNSAran1000_Coelotes_terrestris_8y00E_47y87N_ad_f_A_Agelenidae
ctttgtatttaatttttggggcttggtctgctatagttggaacggctataagagtattga
ttcgaattgaattaggtcaatcagggagttttttaggtgatgatcatatatataatgtta
ttgttactgctcatgcttttgttataattttttttatagtaatgcctattttaattggag
gttttggtaattgattagtgcctttaatgttaggtgctccagatatagcttttcctcgat
taaataatttaagattttgattattacctccttcattatttttgttatttatttcttcta
tagttgaaataggtgtaggggctggatgaacggtttatccgccattagcttctagtatag
gtcatgctggaagatctgttgattttgctattttttctttacatttagctggggcttctt
ctattttaggagcgattaattttatttctactatttttaatatacgatcatatggaatga
cttttgaaaaggttcctttatttgtttggtctgtgttgattactgttgtattattattat
tatctttacctgtattggctggtgctattacaatattgttaactgatcgaaattttaata
cttcattttttgatccagctggaggtggagatcctattttatttcaacattta
>SMNSAran1001_Pardosa_amentata_8y00E_47y87N_ad_f_A_Lycosidae
ctttatatttaatatttggagtttgatcagctataataggaactgctataagagtattaa
ttcgaatggaattaggaaatcctggaagattattaggtgatgatcatttatataatgtta
tagttactgctcatgcttttgtaataattttttttatagtaataccaattcttattggag
gttttggtaattgattagttcctttaatattaggagccccagatatatcatttcctcgaa
taaataatctttctttttgattattacctccttctttatttttgttatctatgtcttcta
tagtggaaataggagttggtgctggatgaactgtttatcctcctttagcatctacggttg
gtcatataggaagttctatagattttgctattttttctcttcatttagctggagcttctt
ctattataggagcagtgaattttatttctactattattaacatacgaatattaggtatat
ctttagaaaaagttcccctttttgtttgatcagttttaattacagctgtattattattac
tttctttacctgtattagcaggtgcaattactatattattaacagatcgaaattttaata
cttctttttttgaccctgctggaggaggagatcctattttatttcaacattta
>SMNSAran1004_Clubiona_reclusa_8y00E_47y87N_ad_f_A_Clubionidae
ctttatatttaatttttggaacttggtctgctatagtaggaacagctataagagtattaa
ttcgtatagaattaggacaatctggaatatttttaggagatgatcatttatataatgttg
tggttacagctcatgcttttattataattttttttatagtaataccaattttaattggtg
ggtttggaaattgaataattcctataatattaggagcagctgatatagcttttccacgaa
taaataacttaagtttttgattattacctccttctttattattattgtttatttcatctt
tggctgaaataggagttggtgcagggtgaacagtttatcctcctttagcatctactgtag
gacatataggaagagctatggattttgctattttttcattacatttagctggtgcttctt
caattataggtgcagtaaattttattactacaattattaatatacgatctgtaggtatga
gaatggaaaaagttcctttatttgtttgatctgttttaattacagcagttcttttattat
tatcattacctgtattagcaggtgctattactatattattaacggatcgaaattttaata
catctttctttgatcctgctggtggaggagatccaattttattccaacatttg
>SMNSAran1005_Aculepeira_ceropegia_8y00E_47y87N_ad_m_A_Araneidae
ctttatatttaatttttggggcttgggcggctatagtaggtacagctataagagtattaa
ttcgaattgaattaggtcaaccaggaaggtttttaggggatgatcaattatacaatgtaa
ttgtaacagcacatgcttttgtaataattttttttatagtaataccaattttaattgggg
gttttggaaattgattagttcctttaatattgggagctcctgatatagcatttcctcgaa
taaataatttaagattttgattattacccccttcattatttttattaattgtgtcttcaa
tagtagaaatgggagtaggagctgggtgaactgtttatccgccattagctgggttagaag
gacatgctgggagatctgtagattttgcaattttttccttacatctagctggggcttctt
ctattatgggtgctattaattttatttcaacaattattaatatgcgatcttatgggataa
ctatggaaaaggttcccttatttgtatgatctgttttaattacagctgttttattacttc
tttctttacctgttttagctggggctattacaatattattaacggatcgaaattttaata
catctttttttgatccttcgggaggtggagatcctattttatttcaacattta
>SMNSAran1007_Xysticus_cristatus_8y00E_47y87N_ad_f_A_Thomisidae
cattatatttattgtttggtgcttgatctgctatagttggaactgcgataagagtattaa
ttcgaatggaattaggaaatgtgggtagattattaggaaatgatcatctatataatgtta
ttgttacagctcatgcttttgtaatgattttttttatagtaatacctattttgattggtg
gatttggaaattgattagtacctttaatattaggtgctcctgatatatcttttcctcgga
taaataatttgtctttttgattacttcctccttcgttatttttattatttatatcatcta
tagtagaaataggtgtgggtgcaggatgaactgtttatcctcctttggcttctagtgtag
gacatataggaagatcaatagattttgctattttttctttacatttagcaggtgcttctt
ctattataggggctgttaattttatttctactattattaatatacgagtaactggaatga
gtatggaaaaagttcctttatttgtttgatctgttttaattacagctattttacttcttt
tatctttacctgttttagctggagctattactatgttacttactgatcgtaattttaata
cttctttctttgaccctgctgggggaggggatccaattttattccaacattta
>SMNSAran1008_Pardosa_amentata_8y00E_47y87N_ad_f_A_Lycosidae
ctttatatttaatatttggagtttgatcagctataataggaactgctataagagtattaa
ttcgaatggaattaggaaatcctggaagattattaggtgatgatcatttatataatgtta
tagttactgctcatgcttttgtaataattttttttatagtaataccaattcttattggag
gttttggtaattgattagttcctttaatattaggagccccagatatatcatttcctcgaa
taaataatctttctttttgattattacctccttctttatttttgttatctatatcttcta
tagtggaaataggagttggtgctggatgaactgtttatcctcctttagcatctacggttg
gtcatataggaagttctatagattttgctattttttctcttcatttagctggagcttctt
ctattataggagcagtgaattttatttctactattattaacatacgaatattaggtatat
ctttagaaaaagttcccctttttgtttgatcagttttaattacagctgtattattattac
tttctttacctgtattagcaggtgcaattactatattattaacagatcgaaattttaata
cttctttttttgaccctgctggaggaggagatcctattttatttcaacattta
>SMNSAran1009_Tetragnatha_extensa_8y00E_47y87N_ad_f_A_Tetragnathidae
gtttatattttttattcggtgtttgatctgctatagtagggacagcaataagagttttaa
ttcgaatcgaattaggacaatctggaagatttttaggtgatgatcagttgtacaatgtta
ttgtcactgcccacgcttttgttataattttttttatggttatacctattttaattgggg
gttttggaaattggttagttcctttgatgttgggggcacctgatatagcttttcctcgaa
taaataatttaagtttttgacttttacccccttcactttttatattatttatttcatcta
tggtggatgtaggagttggagcaggctgaactgtttatccccctttagcatccttggaag
gacattcagggagatctgtggattttgctattttttctcttcacttggctggggcttctt
ctattataggggccattaattttatttccacaattattaatatgcgaataagaggaattt
ctatagaaaaggtcccattatttgtgtgatctgtgttaattactgcggtgttattacttt
tatctctcccagttttagctggtgctatcaccatattgttaactgaccgaaattttaata
cctctttttttgacccttctggtgggggagatcctgtgctttttcaacattta
>SMNSAran1010_Araneus_quadratus_8y00E_47y87N_sbad_f_A_Araneidae
ctttatatttgatttttggagcttgagctgctatagttggaacagctataagagtattaa
ttcgaattgaattaggtcaacctggaagatttatgggtgatgatcaactttataatgtaa
ttgtaactgcacatgcgtttgttataattttttttatggtaatgcctattttaattggag
gttttgggaattgattggttcctttaatattaggagctcccgatatagcatttccacgaa
tgaataatttaagattttgattacttcctccttctttgtttctccttatcgtatcttcta
tagttgaaatgggtgtaggggcaggttgaactgtgtatcctcctttagctggtcttgaag
gacattctggaaggtctgtagattttgcaattttttctttacatttagctggggcatcat
ctattataggtgctattaattttatttcaacaattattaatatacgattttatggtataa
ctatagaaaaagttccattatttgtttgatctgtactaattactgctgtattattattgc
tttctctacctgtattagctggtgctattactatattattaactgatcgaaattttaata
cttcattttttgacccttctggaggtggggatcctattttatttcaacattta
>SMNSAran1011_Heliophanus_dampfi_8y00E_47y87N_ad_m_A_Salticidae
ctttatatttaatttttggagcgtgatctgctatagtaggaactgcaatgagagttttaa
ttcggatggaattaggtcaaactggtagatttttaggtaatgaccatatatataatgtaa
ttgtgacagcacatgcttttgttataattttttttatagtaatgccaattttgattggtg
ggtttggtaattgattagtccctttgatattaggagctcctgatatggcttttcctcgaa
tgaataatttaagtttttgattgttacctccttcgttaatattattatttatttcttcta
tggctgaaataggagttggagcggggtgaactgtttatcctcctttagcttccattattg
gtcataatggaagttctgttgattttgcgattttttctttgcatttggctggagcttctt
ctattataggagctattaattttatttctacggttattaatatacgttctgttggtatga
gattagataaggttcctttatttgtatgatctgtggtgattacggctgtgttattattat
tatctttacctgtattagctggtgctattactatattattgacagatcgtaattttaata
cttcattttttgatcctgctggtgggggtgatcctattttatttcaacattta
>SMNSAran1012_Aculepeira_ceropegia_8y00E_47y87N_jv_m_A_Araneidae
ctttatatttaatttttggggcttgggcggctatagtaggtacagctataagagtattaa
ttcgaattgaattaggtcaaccaggaagatttttaggggatgatcaattatacaatgtaa
ttgtaacagcacatgcttttgtaataattttttttatagtaataccaattttaattgggg
gttttggaaattgattagttcctttaatattgggagctcctgatatagcatttcctcgaa
taaataatttaagattttgattattacccccttcattatttttattaattgtgtcttcaa
tagtagaaatgggagtaggagctgggtgaactgtttatccaccattagctgggttagaag
gacatgctgggagatctgtagattttgcaattttttccttacatctagctggggcttctt
ctattatgggtgctattaattttatttcaacaattattaatatgcgatcttatggaataa
ctatggaaaaggttcctttgtttgtatgatctgttttaattacagctgttttattacttc
tttctttacctgttttagctggggctattacaatattattaacggatcgaaattttaata
catctttttttgatccttcgggaggtggagatcctattttatttcaacattta
>SMNSAran1016_Phylloneta_impressa_8y00E_47y87N_ad_f_A_Theridiidae
ctttatatttaatttttggagcttgggctgcaatagtaggaactggaataagagttttaa
ttcgaacagaagtaggacaaactggaagttttttaggaaatgatcatttatataatgaaa
ttgtaacggctcatgcttttgtaataattttttttatagttatacctattttaattggtg
ggtttggtaattgattggtaccattaatattaggggctcctgatatagcatttcctcgaa
taaataatttaagtttttgattattaccaccttctttatttttattatttatttcgtcta
tagtagaaataggggtaggttctggatgaacagtatatcctcctttatcatctttagatg
ggcatggaggtagatctgtagattttgctattttttctcttcatttagctggtgcttcat
caattataggagctgtaaattttatttctacagtattaaatatacgatcttatagaataa
ctatagaaaaaatttcattatttgtatgatcagtattaattactgctgtattattattan
nnnnnnnnnnnnnnnnnnnnnnnnnnnnnnnnnnnnnnnnnnnnnnnnnnnnnnnnnnnn
nnnnnnnnnnnnnnnnnnnnnnnnnnnnnnnnnnnnnnnnnnnnnnnnnnnnn
>SMNSAran1017_Metellina_mengei_8y00E_47y87N_ad_f_A_Tetragnathidae
cattatatttattttttggggcttgagctgctatagtgggtactgctataagagtgttaa
ttcgaattgaattagggcaatctggaagattgttaggagatgatcagttgtataatgtta
ttgttacagctcatgcttttgtaataattttttttatagtaatacctattttgattgggg
gtttcggaaattgactggttcctttaatgttgggggcacctgatatagcttttcctcgaa
taaataatttgagattttggttattacctccttcattttttttattgctagtttcttcta
tggttgatattggagtgggggcaggatgaactgtttatccgcctttggcggctttggatg
ggcatgctggtagctcaatagattttgctattttttctttacatttggctggggcttctt
caattatgggggctattaattttatttctactgttttgaatatacgttcttggggaataa
gaatagatagggttcctttgtttgtgtgatcagtattgattaccgctgttttgttacttt
tatctttaccggttttagctggggctattactatgttgttaactgatcnnnnnnnnnnnn
nnnnnnnnnnnnnnnnnnnnnnnnnnnnnnnnnnnnnnnnnnnnnnnnnnnnn
>SMNSAran1018_Clubiona_reclusa_8y00E_47y87N_ad_f_A_Clubionidae
ctttatatttaatttttggaacttggtctgctatagtaggaacagctataagagtattaa
ttcgtatagaattaggacaatctggaatatttttaggagatgatcatttatataatgttg
tggttacagctcatgcttttattataattttttttatagtaataccaattttaattggtg
ggtttggaaattgaataattcctataatattaggagcagctgatatagcttttccacgaa
taaataacttaagtttttgattattacctccttctttattattattgtttatttcatctt
tggctgaaataggagttggtgcagggtgaacagtttatcctcctttagcatctactgtag
gacatataggaagagctatggattttgctattttttcattacatttagctggtgcttctt
caattataggtgcagtaaattttattactacaattattaatatacgatctgtaggtatga
gaatggaaaaagttcctttatttgtttgatctgttttaattacagcagttcttttattat
tatcattacctgtattagcaggtgctattactatattattaacggatcgaaattttaata
catctttctttgatcctgctggtggaggagatccaattttattccaacatttg
>SMNSAran1019_Gibbaranea_omoeda_8y00E_47y87N_sbad_f_A_Araneidae
ctttatatttaatttttggagcttgggctgctatggtaggtacagcaataagagttttga
ttcggattgaattaggtcaatcgggtaggtttattggtgatgatcagatttataacgtaa
ttgtaacagctcatgcttttgtaataattttttttatagtaatacctattttgatcgggg
gttttggaaattggttggttccgttaatattaggggcccctgatatagcttttccacgta
taaataatttgagtttttgattattacctccatctttatttcttttaattatttcatcta
tagtcgagataggagttggtactggatggaccgtttatcctcctttggctggattggaag
gtcatgctggcagatcagtagattttgcaattttttctttacatttagctggggcttctt
ctattataggagctattaattttatttctactattattaatatacggtcttatgggatat
ctatagagaaggttcctttatttgtatggtctgtattaattactgcaattttgttattac
tttctttacctgttttagctggtgctattacaatattattaacggatcgaaattttaata
catcattttttgatccttcaggcgggggagatcctattttatttcaacatttg
>SMNSAran1021_Misumena_vatia_9y69E_48y92N_jv_f_A_Thomisidae
ctttatattttatatttggagcttgatcggctatagttggtactgctataagagttttaa
ttcggatggagttaggtaattctggaagattattaggaaatgatcatttatataatgtta
ttgtgactgctcatgcttttgtaataattttttttatagtaataccaattttgattggag
gttttggtaattgattagtacctttaatattaggagctcctgatatatcttttccacgta
taaataatttatctttttggttattacctccttcattatttttattatttatatcttcta
tggttgaaataggggtcggtgcgggttgaacagtataccctcctttagcttctagagtag
gtcatataggaagatcaatggattttgctattttttctcttcatttagctggtgcttcat
caattataggagctgttaattttatttctacaattattaatatacggagtgaggggataa
gaatagaaaaagttcctttgtttgtttgatctgttttaattacagctattttattgcttt
tatcacttcctgttttagcaggggctattactatattnctgactgatcgtaannnnnnnn
nnnnnnnnnnnnnnnnnnnnnnnnnnnnnnnnnnnnnnnnnnnnnnnnnnnnn
>SMNSAran1023_Philodromus_aureolus_9y69E_48y92N_ad_m_A_Philodromidae
cattatatttaatttttggagcatgagcagcaatagttgggacagcaataagagtattaa
ttcgaatagaattaggtcaagtaggaaaatttttaggtgatgatcatttatataatgtaa
ttgtaactgcacatgcatttgttataattttttttatagtaatacctattttgattggtg
ggtttggtaattgattggtacctttaatattaggtgcaccagatatggcttttcctcgaa
tgaacaatttaagtttttgactacttcccccatcgttattattattatttatttcttcta
tagtagagataggggttggaactggttgaacagtttatcctcctttggcttcaataacag
gtcatgcgggtagtgcagttgattttgctattttctcgttacatttagcaggtgcatctt
ctattataggttctattaattttatttctactattattaatatacgatctagtgggataa
agatagataaagttcctttatttgtatgatctgttataattactactgtattattattat
tatcattaccagtattagcaggtgctattactatacttttaacagatcggaattttaata
catctttttttgatcctgctggaggaggagatcctattttatttcaacattta
>SMNSAran1024_Neriene_radiata_9y69E_48y92N_ad_f_A_Linyphiidae
ctttatattttatttttggagcatgagctgctatggtaggtacagcaataagagtattaa
ttcgaattgagttaggtcaaactggaagattattaggagatgaccaattatataatgtaa
ttgtaacagcccatgcttttgtaataattttttttatggttatacctattttgattggag
gttttggaaattggttagttcctttaatattaggagcacctgatatggcttttcctcgaa
taaataacttaagtttttgattattacccccttctttatttttattattcatttcttctt
tagctgaggttggtgttggggctggatgaactgtgtatcctcccttatcttctttagaag
gtcattcaggaagatctatagattttgctattttttctttacatttagctggggcttcat
caattataggggctattaattttatttctacaattctaaatatgcgagcttatggagttt
ctatagaaaaagtttctttatttgtttgatcagttttaattacagctgtacttttattat
tatctctacctgttttagctggggctatcacaatgttattaactgatcgaaattttaata
cttctttttttgatccagctggagggggggatccaattttatttcaacattta
>SMNSAran1026_Evarcha_arcuata_9y69E_48y92N_ad_m_A_Salticidae
ctttatatttaatttttggagcttgagctgctatagtaggaactgctataagagtattaa
ttcgaatagaattgggacaaactggtagttttttgggaaatgaacatttatataatgtta
ttgttactgctcatgcatttgttataatcttttttatagttatgcctattataattggag
gttttggtaattgattagttcctttaatgttaggagctcctgatatagcttttcctcgga
taaataatttaagattttgacttttacctccttctttaatattattatttatttcatcta
tagctgaaataggggtaggagctggatgaacagtatatccacctttagcttctattgtgg
gtcataatggtagatctgtggattttgctattttttctttgcatttggctggggcatctt
ctattataggtgctattaattttatttcaactgttattaatatacgatcagtagggatat
caatagataaaatttctttatttgtatgatcggttttaattactgctgtattattattat
tatcattaccnnnnnnnnnnnnnnnnnnnnnnnnnnnnnnnnnnnnnnnnnnnnnnnnnn
nnnnnnnnnnnnnnnnnnnnnnnnnnnnnnnnnnnnnnnnnnnnnnnnnnnnn
>SMNSAran1027_Neriene_radiata_9y69E_48y92N_ad_m_A_Linyphiidae
ctttatattttatttttggagcatgagctgctatggtaggtacagcaataagagtattaa
ttcgaattgagttaggtcaaactggaagattattaggagatgaccaattatataatgtaa
ttgtaacagcccatgcttttgtaataattttttttatggttatacctattttgattggag
gttttggaaattggttagttcctttaatattaggagcacctgatatggcttttcctcgaa
taaataacttaagtttttgattattacccccttctttatttttattattcatttcttctt
tagctgaggttggtgttggggctggatgaactgtgtatcctcccttatcttctttagaag
gtcattcaggaagatctatagattttgctattttttctttacatttagctggggcttcat
caattataggggctattaattttatttctacaattctaaatatgcgagcttatggagttt
ctatagaaaaagtttctttatttgtttgatcagttttaattacagctgtacttttattat
tatctctacctgttttagctggggctatcacaatgttattaactgatcgaaattttaata
cttctttttttgatccagctggagggggggatccaattttatttcaacattta
>SMNSAran1029_Aculepeira_ceropegia_9y69E_48y92N_ad_f_A_Araneidae
ctttatatttaatttttggggcttgggcggctatagtaggtacagctataagagtattaa
ttcgaattgaattaggtcaaccaggaaggtttttaggggatgatcaattatacaatgtaa
ttgtaacagcacatgcttttgtaataattttttttatagtaataccaattttaattgggg
gttttggaaattgattagttcctttaatattgggagctcctgatatagcatttcctcgaa
taaataatttaagattttgattattacccccttcattatttttattaattgtgtcttcaa
tagtagaaatgggagtaggagctgggtgaactgtttatccaccattagctgggttagaag
gacatgctgggagatctgtagattttgcaattttttccttacatctagctggggcttctt
ctattatgggtgctattaattttatttcaacaattattaatatgcgatcttgtggaataa
ctatggaaaaggttcccttatttgtatgatctgttttaattacagctgttttattacttc
tttctttacctgttttagctggggctattacaatattattaacggatcgaaattttaata
catctttttttgatccttcgggaggtggagatcccattttatttcaacattta
>SMNSAran1031_Philodromus_collinus_9y74E_48y62N_ad_m_A_Philodromidae
cattatatttaatttttggagcgtgagcagcaatggttggaacagcaataagagtattaa
ttcgaatggaattaggtcaagtaggtaaatttttaggtgatgatcacctatataatgtaa
ttgtaactgcacatgcatttgttataattttttttatagtaataccaattttaattggtg
ggtttggtaattgattggtacctttaatattaggtgctccagatatagcttttcctcgaa
taaataatttaagtttttgattacttccaccatcattattgttactatttatttcttcta
tagtagagataggggttggtactggttgaacagtatatcctcctttagcttcaataacag
gtcatgctggtagtgcagttgattttgctattttctcgttacatttagcaggtgcatctt
ctattataggttctattaattttatttctactattattaatatacgctctagtggaataa
aaatggataaagttcctttatttgtatgatctgttataattacgactgtattattacttt
tatctttacctgtattagcaggtgctattactatacttttaactgatcgaaattttaata
catctttttttgatcctgcgggtgggggggatcctattttatttcaacattta
>SMNSAran1032_Xysticus_bifasciatus_9y74E_48y62N_jv_m_A_Thomisidae
ctttatatttattatttggtgcttgatcagctatagttggtactgcaataagagttttaa
tccgtatagaattaggaaatgtaggaagattattaggaaatgatcatttatataatgtaa
ttgttacagctcatgctttcgttataattttttttatagttatacctattttaattggtg
gatttggaaattgattagtacctttaatgttaggtgctcctgatatatcttttcctcgaa
taaataatttatctttctggttacttcctccttctttgtttttattatttatatcatctt
tagtagaaataggtgttggggctggatgaactgtttatcctcctttagcatcaagtgttg
gtcatataggaagatctatggattttgctattttttctcttcatttggctggggcttctt
caattataggtgctgtaaattttatttctacaattattaatatacgagttacaggaataa
ctatggaaaaagttcctttgtttgtatgatctgtgttaattacagctattttacttttat
tatctttacctgttttggcaggggctattacaatattattaactgatcggaattttaata
cttctttttttgatcctgcaggtgggggggatcctattttgtttcaacattta
>SMNSAran1036_Pisaura_mirabilis_9y71E_49y62N_ad_f_A_Pisauridae
ctttatatttaatatttggagtttgatctgctatagcaggaacagctataagagtattaa
ttcgaatagagttaggaaatcctggaagattattaggagatgatcatttatataatgtag
tggttactgctcatgcttttgttataattttttttatagttatacctattataattggag
gttttggaaattgattagttcctttaatattaggagctcctgatatatcatttccccgaa
taaataatttgtctttttgacttttacccccttctctatttttattatttatatcttcta
tagtagaaataggagttggtgctggttgaacagtttatcctcctttagcatctatagttg
gtcatataggaagatctatagattttgctattttttctttacatttagctggggcttctt
ctattataggagccgttaattttatttctactattataaatatacgattaaatggaatat
caatagaaaaaatccctttatttgtatggtctgttttaattactgctattttacttttat
tgtctttaccagttttagctggtgctattactatattattaactgatcgaaattttaata
cttctttttttgatccagctggtggaggtgatcctattttatttcaacattta
>SMNSAran1038_Pisaura_mirabilis_8y92E_48y58N_ad_f_A_Pisauridae
ctttatatttaatatttggagtttgatctgctatagcaggaactgctataagagtattaa
ttcgaatagagttaggaaatcctggaagattattaggagatgatcatttatataatgtag
tggttactgctcatgcttttgttataattttttttatagttatacctattataattggag
gttttggtaattgattagttcctttaatattaggagctcctgatatatcatttccccgaa
taaataatttgtctttttgacttttacccccttctctatttttattatttatatcttcta
tagtagaaataggagttggtgctggttgaacagtttatcctcctttagcatctacagttg
gtcatataggaagatctatagattttgctattttttctttacatttagctggggcttctt
ctattataggagccgttaattttatttctactattataaatatacgattaaatggaatgt
caatagaaaaaatccctttatttgtatggtctgttttaattactgctattttacttttat
tgtctttaccagttttagctggtgctattactatattattaactgatcgaaattttaata
cttctttttttgatccagctggtggaggtgatcctattttatttcaacattta
>SMNSAran1040_Argiope_bruennichi_9y41E_48y61N_ad_m_A_Araneidae
ctttatacttgatttttggagcttgagctgctatagtgggtacagcaataagagtattga
ttcgaattgaattaggacagcctgggagatttatgggtgatgatcaattatataatgtaa
ttgttacagctcatgcatttgtaataattttttttatagttataccaatcttgattgggg
gttttgggaactggttagttcctttaatattaggagctcctgatatagcatttccacgaa
tgaataatttaaggttttggttattacctccttcattatttcttttaattgtttcttcaa
tagtagaaataggagtaggagcaggatgaacagtgtatcccccattggctggattagaag
gtcatgctgggagatccgtagattttgcaattttttcacttcatttggctggggcttctt
caattataggagcaattaattttatttcaacaattattaatatgcgattttatggaataa
caatagaaaaggtacctttatttgtttggtctgttttaattacggctgttcttttattat
tatctttacctgttttagcaggggctattactatattattaactgnnnnnnnnnnnnnnn
nnnnnnnnnnnnnnnnnnnnnnnnnnnnnnnnnnnnnnnnnnnnnnnnnnnnn
>SMNSAran1041_Xysticus_acerbus_9y41E_48y61N_sbad_m_A_Thomisidae
ctttatatttactttttggagcttgatctgctatagttggtactgcaataagagttttga
ttcgaatagagttggggaatgtaggtagattattaggaaatgatcatttatataatgtta
ttgtaacagctcatgcttttgttatgattttttttatagtaatacctattttaattggag
gttttggaaattgattggttccattaatattaggtgctcctgatatatcttttcctcgta
taaataatttatctttttggttacttcctccttctttgtttttgttatttatatcatcta
tagtggaaataggtgtaggagcaggatgaactgtttatcctcctttggcatcaagtgtag
gtcatataggaagatctatagattttgctattttttctcttcatttagcgggtgcttctt
caattataggtgctgttaattttatttctactattattaatatacgtgtaacagggatat
ctattgaaagggtacctttgtttgtgtgatctgttctaattacagctattcttcttcttt
tgtctttacctgttttagcaggggctattactatattattaacagatcgaaacnnnnnnn
nnnnnnnnnnnnnnnnnnnnnnnnnnnnnnnnnnnnnnnnnnnnnnnnnnnnn
>SMNSAran1043_Enoplognatha_ovata_9y54E_48y65N_ad_f_A_Theridiidae
ctttatatttattgtttggagcttgggctgctatagtaggtacagctataagagttttaa
ttcgaattgagttggggcaaactgggagatttttaggtgacgatcaattatataatgtaa
ttgtaacagctcatgcatttgtaataattttttttatagttatacctattttaattggag
gttttgggaattggttagttcctttaatattaggagctcctgatatggcttttcctcgaa
taaataatttaagtttttgattactacctccttcattaatattattatttgtttcttcaa
tagtagaaataggagtaggagctgggtggacagtttaccctcctttatcttctttggaag
gacatgctggtagatctgtagattttgctattttttctttacatttagctggtgcttcat
ctattataggagctattaattttatttctactattttaaatatacgttcttttggaataa
gaatagaaaaggtttctctttttgtctgatctgttcttattactgctgttttattgttac
tttctttacctgtattagcaggagctatcactatattattgacggatcgaaattttaata
cttcattttttgatcctgcggggggaggagatcctattttatttcaacnnnnn
>SMNSAran1044_Enoplognatha_ovata_9y54E_48y65N_ad_f_A_Theridiidae
ctttatatttattgtttggagcttgggctgctatagtaggtacagctataagagttttaa
ttcgaattgagttggggcaaactgggagatttttaggtgacgatcaattatataatgtaa
ttgtaacagctcatgcatttgtaataattttttttatagttatacctattttaattggag
gttttgggaattggttagttcctttaatattaggagctcctgatatggcttttcctcgaa
taaataatttaagtttttgattactacctccttcattaatattattatttgtttcttcaa
tagtagaaataggagtaggagctgggtggacagtttaccctcctttatcttctttggaag
gacatgctggtagatctgtagattttgctattttttctttacacttagctggtgcttcat
ctattataggagctattaattttatctctactattttaaatatacgttcttttggaataa
gaatagaaaaggtttctctttttgtctgatctgttcttattactgctgttttattattac
tttctttacctgtattagcaggagctattactatattattgacggatcgaaattttaata
ctacaacnnnnnnnnnnnnnnnnnnnnnnnnnnnnnnnnnnnnnnnnnnnnnn
>SMNSAran1050_Metellina_segmentata_7y69E_47y55N_ad_f_A_Tetragnathidae
cattatattttatttttggagcttgggctgctatagtaggtactgctataagagtattga
ttcgtattgaattggggcaatctggaagattgctgggggatgatcaattgtataatgtta
ttgttactgcgcatgcttttgtaataattttttttatagttatacctattttgattggag
gatttggaaattggttggtgcctcttatattgggggctcctgatatagcttttcctcgaa
taaataatttaagattttggttattacctccttcattttttttgttgttagtttcttcta
tggttgatattggggtgggggcaggatgaactatttatcccccattagctagtttagacg
ggcattctggtagatcaatagattttgctattttttctttacatttggcgggggcttctt
caattataggggctattaattttatttctactgttttgaatatgcgttcttggggaatag
gaatagatagggtgcctttgtttgtgtgatcagttttgattacggctgttttgttacttt
tatctctaccggtgttagctggtgctatcactatgttgttgacggatcgtaattttaata
cttcattttnnnnnnnnnnnnnnnnnnnnnnnnnnnnnnnnnnnnnnnnnnnn
>SMNSAran1051_Pardosa_lugubris_7y69E_47y55N_sbad_f_A_Lycosidae
ctttatatttaatatttggagtttgatcggctataatagggactgctataagagtattaa
ttcgaatagaattaggaaatcctgggagattattaggtgatgatcatttatataatgtta
tagttactgctcatgcttttgtaataattttttttatagtaataccaattcttattggag
gttttgggaattgattaattcctttaatattaggagctccagatatatcatttcctcgaa
taaataatctttctttttgattattacctccttctttatttttattatctatatcttcta
tagtggagataggagttggtgctggatgaactgtttatcctcctttagcatctacggttg
gtcatataggaagttcaatagattttgctattttttctcttcatttggctggagcctctt
ctattataggggctgtaaattttatttctactattataaatatacggataataggaatat
ctttagaaaaagttcctctttttgtttgatcagttttaattacagcagtattattattac
tttctttacctgttttagcaggtgctattactatattattaacannnnnnnnnnnnnnnn
nnnnnnnnnnnnnnnnnnnnnnnnnnnnnnnnnnnnnnnnnnnnnnnnnnnnn
>SMNSAran1053_Argiope_bruennichi_7y57E_47y89N_ad_f_A_Araneidae
ctttatacttgatttttggagcttgagctgctatagtaggtacagcaataagagtattga
ttcgaattgaattaggacagcctgggagatttatgggtgatgatcaattatataatgtaa
ttgttacagctcatgcatttgtaataattttttttatagttataccaatcttgattgggg
gttttgggaactggttagttcctttaatattaggagctcctgatatagcatttccacgaa
tgaataatttaaggttttggttattacctccttcattatttcttttaattgtttcttcaa
tagtagaaataggagtaggagcaggatgaacagtgtatcccccattggctggattagaag
gtcatgctgggagatccgtagattttgcaattttttcacttcatttggctggggcttctt
caattataggagcaattaattttatttcaacaattattaatatgcgattttatggaataa
caatagaaaaggtacctttatttgtttggtctgttttaattacggctgttcttttattat
tatctttacctgttttagcaggggctattacaatattattaactgatcgaaattttaata
cttctttttttgnnnnnnnnnnnnnnnnnnnnnnnnnnnnnnnnnnnnnnnnn
>SMNSAran1054_Argiope_bruennichi_7y57E_47y89N_sbad_f_A_Araneidae
ctttatacttgatttttggagcttgagctgctatagtgggtacagcaataagagtattga
ttcgaattgaattaggacagcctgggagatttatgggtgatgatcaattatataatgtaa
ttgttacagctcatgcatttgtaataattttttttatagttataccaatcttgattgggg
gttttgggaactggttagttcctttaatattaggagctcctgatatagcatttccacgaa
tgaataatttaaggttttggttattacctccttcattatttcttttaattgtttcttcaa
tagtagaaataggagtaggagcaggatgaacagtgtatcccccattggctggattagaag
gtcatgctgggagatccgtagattttgcaattttttcacttcatttggctggggcttctt
caattataggagcaattaattttatttcaacaattattaatatgcgattttatggaataa
caatagaaaaggtacctttatttgtttggtctgttttaattacggctgttcttttattat
tatctttacctgttttagcaggggctattacgatattattaactgatcgaaattggtcaa
caaatcnnnnnnnnnnnnnnnnnnnnnnnnnnnnnnnnnnnnnnnnnnnnnnn
>SMNSAran1055_Argiope_bruennichi_7y57E_47y89N_ad_f_A_Araneidae
ctttatacttgatttttggagcttgagctgctatagtgggtacagcaataagagtattga
ttcgaattgaattaggacagcctgggagatttatgggtgatgatcaattatataatgtaa
ttgttacagctcatgcatttgtaataattttttttatagttataccaatcttgattgggg
gttttgggaactggttagttcctttaatattaggagctcctgatatagcatttccacgaa
tgaataatttaaggttttggttattacctccttcattatttcttttaattgtttcttcaa
tagtagaaataggagtaggagcaggatgaacagtgtatcccccattggctggattagaag
gtcatgctgggagatccgtagattttgcaattttttcacttcatttggctggggcttctt
caattataggagcaattaattttatttcaacaattattaatatgcgattttatggaataa
caatagaaaaggtacctttatttgtttggtctgttttaattacggctgttcttttattat
tatctttacctgttttagcaggggctattacaatattattaactgttcgaaannnnnnnn
nnnnnnnnnnnnnnnnnnnnnnnnnnnnnnnnnnnnnnnnnnnnnnnnnnnnn
>SMNSAran1059_Oxyopes_ramosus_7y57E_47y89N_jv_f_A_Oxyopidae
ctttatatttaatatttggagtttggtcagctatagtaggaacagctataagagttttaa
ttcgtatagaattaggtcattctggaagaatattaggagatgatcatttatataatgtta
ttgttactgctcatgcttttgtaataattttttttatagttatgccaattttgattggtg
gatttggaaattgattagttcctttaatattaggggctcctgatatatcatttcctcgaa
taaataatttatcattttgattacttcctccttctttgtttttattatttatatcttcta
tagttgaaataggggtaggagcggggtggacagtatatcctcctttagcttctagtactg
gtcatataggaagatcaatagattttgctattttttctttacatttagctggtgcttctt
ctattataggagctgtaaattttatttctactattattaatatacggttaagtagaataa
gaatagaaaaggttcctttatttgtatgatctgtttttattactgctattttattattat
tatctttacctgttttagcaggagctattactatattattaactgatcgaaattgtaata
cttctttttnnnnnnnnnnnnnnnnnnnnnnnnnnnnnnnnnnnnnnnnnnnn
>SMNSAran1060_Misumena_vatia_7y57E_47y89N_jv_f_A_Thomisidae
ctttatatttattatttggagcttgatcggctatagttggtactgctataagagttttaa
ttcggatggagttaggtaattctggaagattattaggaaatgatcatttatataatgtta
ttgtgactgctcatgcttttgtaataattttttttatagtaataccaattttgattggag
gttttggtaattgattagtacctttaatattaggagctcctgatatatcttttccacgta
taaataatttatctttttggttattacctccttcattatttttattatttatatcttcta
tggttgaaataggggtcggtgcgggttgaacagtataccctcctttagcttctagagtag
gtcatataggaagatcaatggattttgctattttttctcttcatttagctggtgcttcat
caattataggagctgttaattttatttctacaattattaatatacggagtgaggggataa
gaatagaaaaagttcctttgtttgtttgatctgttttaattacagctattttattgcttt
tatcatgtcctgtgtttgcaggggctattacaatattattgactgatcgaaatctgacca
cttcannnnnnnnnnnnnnnnnnnnnnnnnnnnnnnnnnnnnnnnnnnnnnnn
>SMNSAran1062_Enoplognatha_ovata_7y57E_47y89N_ad_f_A_Theridiidae
ctttatatttattgtttggagcttgggctgctatagtaggtacagctataagagttttaa
ttcgaattgagttggggcaaactgggagatttttaggtgacgatcaattatataatgtaa
ttgtaacagctcatgcatttgtaataattttttttatagttatacctattttaattggag
gttttgggaattggttagttcctttaatattaggagctcctgatatggcttttcctcgaa
taaataatttaagtttttgattactacctccttcattaatattattatttgtttcttcaa
tagtagaaataggagtaggagctgggtggacagtttaccctcctttatcttctttggaag
gacatgctggtagatctgtagattttgctattttttctttacacttagctggtgcttcat
ctattataggagctattaattttatctctactattttaaatatacgttcttttggaataa
gaatagaaaaggtttctctttttgtctgatctgttcttattactgctgttttattgttac
tttctttacctgtattagggggagctattcctatatttttgacggatcgaaatttcaata
cttcnnnnnnnnnnnnnnnnnnnnnnnnnnnnnnnnnnnnnnnnnnnnnnnnn
>SMNSAran1063_Tetragnatha_nigrita_7y57E_47y89N_ad_m_A_Tetragnathidae
gtttatattttatttttggtgtttgatctgctatagtgggaactgctataagagtattga
ttcgaattgaattaggacaatcagggagatttttaggggatgatcaattgtataatgtta
ttgtaactgcccatgcttttgtaatgattttttttatagtgatacctattttgattgggg
gatttggaaattgattagtaccattgatattaggggcaccagatatggcttttcctcgca
tgaataatttaagtttttggcttttacccccatctctttttatattatttatttcttcta
tagttgatataggggtgggagctgggtgaactgtttacccccctctcgcttctttagaag
gacatcctggtagttcagtagattacgctattttttctttacatttagctggggcctcgt
ctattataggggctattaattttatttctactattattaatatacgaatggggggagttt
ctatggagaaggttcctctttttgtatgatcggtattaattaccgctgttttattattac
tatctttaccagttttatcaggggctattacaatattgttgacagatcgtaattggaaga
cnnnnnnnnnnnnnnnnnnnnnnnnnnnnnnnnnnnnnnnnnnnnnnnnnnnn
>SMNSAran1064_Tetragnatha_nigrita_7y57E_47y89N_ad_f_A_Tetragnathidae
gtttatattttatttttggggtttgatctgctatagtgggaactgcgataagagtattga
ttcgaattgaattaggacaatcagggagatttttaggggatgatcaattgtataatgtta
ttgtaactgcccatgcttttgtaatgattttttttatagtgatacctattttgattgggg
gatttggaaattgattagtaccattgatattaggggcaccagatatggcttttcctcgca
tgaataatttaagtttttggcttttgcccccatctctttttatattatttatttcttcta
tagttgatataggggtgggagctggatgaactgtttacccccctctcgcttctttagaag
gacatcctggtagttcagtagattacgctattttttctttacatttagctggggcctcgt
ctattataggggctattaactttatttctactattattaatatacgaatggggggagttt
ctatggagaaggttcctctttttgtatgatcggtattaattactgctgttttattattac
tatctttaccagttttagcaggggctatcacaatattgttgacagatcgtaattttaata
cttctnnnnnnnnnnnnnnnnnnnnnnnnnnnnnnnnnnnnnnnnnnnnnnnn
>SMNSAran1065_Xysticus_acerbus_7y57E_47y89N_ad_f_A_Thomisidae
[truncated: 2,181,952 more chars]
