# Supplementary material for: Towards a DNA Barcode Reference Database for Spiders and Harvestmen of Germany
Source: PLoS One. 2016 Sep 28;11(9):e0162624. doi: 10.1371/journal.pone.0162624 (PMC5040438; doi:10.1371/journal.pone.0162624)
Supplement: S1 Table — This table lists collecting date and location (incl. GPS coordinates), collector, taxonomy, identifier, preservation fluid, life stage and sex for the specimens analyzed. Sample IDs in this table correspond to those given in S1 Fig (NJ tree) and S2 Fig (ML tree), as well as in S4 Table ('splits') and S5 Table ('lumps'). Please note that while working on the release dataset, some species names have changed: Dictyna civica -> Brigittea civica, Dictyna latens -> Brigittea latens, Hahnia difficilis -> Iberina difficilis, Hahnia montana -> Iberina montana, Lepthyphantes keyserlingi -> Ipa keyserlingi, Titanoeca psammophila -> Titanoeca spominima. For these species, the old names are used throughout the article and related materials. (XLSX) [file pone.0162624.s007.xlsx]

## Sheet: specimens GBOL arachnid release
sample IDs	order	family	species	sex	life stage	country	province / region	locality	East	North	collection date	collector(s)	identified through	sampling fluid	sample ID in alignment
SMNK-ARA 08138. ZFMK-DNA-100415558	Araneae	Lycosidae	Pardosa palustris	female	adult	Germany	Baden-Württemberg	Heimsheim	8.87	48.8	18.05.2012	Höfer. H.	Meyer. F.	ethanol 70%	SMNKARA08138
SMNK-ARA 08141. ZFMK-DNA-100416338	Araneae	Lycosidae	Pardosa palustris	male	adult	Germany	Baden-Württemberg	Heimsheim	8.87	48.8	18.05.2012	Höfer. H.	Meyer. F.	ethanol 70%	SMNKARA08141
SMNK-ARA 08142. ZFMK-DNA-100415981	Araneae	Lycosidae	Pardosa palustris	male	adult	Germany	Baden-Württemberg	Heimsheim	8.87	48.8	18.05.2012	Höfer. H.	Meyer. F.	ethanol 70%	SMNKARA08142
SMNK-ARA 08143. ZFMK-DNA-100415956	Araneae	Lycosidae	Pardosa palustris	male	adult	Germany	Baden-Württemberg	Heimsheim	8.87	48.8	18.05.2012	Höfer. H.	Meyer. F.	ethanol 70%	SMNKARA08143
SMNK-ARA 08144. ZFMK-DNA-100416001	Araneae	Lycosidae	Pardosa palustris	male	adult	Germany	Baden-Württemberg	Heimsheim	8.87	48.8	18.05.2012	Höfer. H.	Meyer. F.	ethanol 70%	SMNKARA08144
SMNK-ARA 08145. ZFMK-DNA-100415551	Araneae	Lycosidae	Pardosa palustris	male	adult	Germany	Baden-Württemberg	Heimsheim	8.87	48.8	18.05.2012	Höfer. H.	Meyer. F.	ethanol 70%	SMNKARA08145
SMNK-ARA 08147. ZFMK-DNA-100416026	Araneae	Lycosidae	Pardosa palustris	male	adult	Germany	Baden-Württemberg	Heimsheim	8.87	48.8	18.05.2012	Höfer. H.	Meyer. F.	ethanol 70%	SMNKARA08147
SMNK-ARA 08148. ZFMK-DNA-100415548	Araneae	Lycosidae	Pardosa palustris	male	adult	Germany	Baden-Württemberg	Heimsheim	8.87	48.8	18.05.2012	Höfer. H.	Meyer. F.	ethanol 70%	SMNKARA08148
SMNK-ARA 08150. ZFMK-DNA-100415535	Araneae	Lycosidae	Pardosa palustris	male	adult	Germany	Baden-Württemberg	Heimsheim	8.87	48.8	18.05.2012	Höfer. H.	Meyer. F.	ethanol 70%	SMNKARA08150
SMNK-ARA 08151. ZFMK-DNA-100416387	Araneae	Lycosidae	Pardosa palustris	male	adult	Germany	Baden-Württemberg	Heimsheim	8.87	48.8	18.05.2012	Höfer. H.	Meyer. F.	ethanol 70%	SMNKARA08151
SMNK-ARA 08152. ZFMK-DNA-100415537	Araneae	Lycosidae	Pardosa palustris	male	adult	Germany	Baden-Württemberg	Heimsheim	8.87	48.8	18.05.2012	Höfer. H.	Meyer. F.	ethanol 70%	SMNKARA08152
SMNK-ARA 08153. ZFMK-DNA-100415538	Araneae	Lycosidae	Pardosa palustris	male	adult	Germany	Baden-Württemberg	Heimsheim	8.87	48.8	18.05.2012	Höfer. H.	Meyer. F.	ethanol 70%	SMNKARA08153
SMNK-ARA 08154. ZFMK-DNA-100415977	Araneae	Lycosidae	Pardosa lugubris	female	adult	Germany	Baden-Württemberg	Heimsheim	8.87	48.8	18.05.2012	Höfer. H.	Meyer. F.	ethanol 70%	SMNKARA08154
SMNK-ARA 08155. ZFMK-DNA-100415540	Araneae	Lycosidae	Pardosa lugubris	female	adult	Germany	Baden-Württemberg	Heimsheim	8.87	48.8	18.05.2012	Höfer. H.	Meyer. F.	ethanol 70%	SMNKARA08155
SMNK-ARA 08156. ZFMK-DNA-100415541	Araneae	Lycosidae	Pardosa lugubris	female	adult	Germany	Baden-Württemberg	Heimsheim	8.87	48.8	18.05.2012	Höfer. H.	Meyer. F.	ethanol 70%	SMNKARA08156
SMNK-ARA 08157. ZFMK-DNA-100415542	Araneae	Lycosidae	Pardosa lugubris	female	adult	Germany	Baden-Württemberg	Heimsheim	8.87	48.8	18.05.2012	Höfer. H.	Meyer. F.	ethanol 70%	SMNKARA08157
SMNK-ARA 08158. ZFMK-DNA-100415543	Araneae	Lycosidae	Pardosa lugubris	female	adult	Germany	Baden-Württemberg	Heimsheim	8.87	48.8	18.05.2012	Höfer. H.	Meyer. F.	ethanol 70%	SMNKARA08158
SMNK-ARA 08159. ZFMK-DNA-100416003	Araneae	Lycosidae	Pardosa lugubris	female	adult	Germany	Baden-Württemberg	Heimsheim	8.87	48.8	18.05.2012	Höfer. H.	Meyer. F.	ethanol 70%	SMNKARA08159
SMNK-ARA 08160. ZFMK-DNA-100415545	Araneae	Lycosidae	Pardosa lugubris	female	adult	Germany	Baden-Württemberg	Heimsheim	8.87	48.8	18.05.2012	Höfer. H.	Meyer. F.	ethanol 70%	SMNKARA08160
SMNK-ARA 08161. ZFMK-DNA-100415982	Araneae	Lycosidae	Pardosa lugubris	female	adult	Germany	Baden-Württemberg	Heimsheim	8.87	48.8	18.05.2012	Höfer. H.	Meyer. F.	ethanol 70%	SMNKARA08161
SMNK-ARA 08162. ZFMK-DNA-100415534	Araneae	Lycosidae	Pardosa lugubris	female	adult	Germany	Baden-Württemberg	Heimsheim	8.87	48.8	18.05.2012	Höfer. H.	Meyer. F.	ethanol 70%	SMNKARA08162
SMNK-ARA 08163. ZFMK-DNA-100415533	Araneae	Lycosidae	Pardosa lugubris	female	adult	Germany	Baden-Württemberg	Heimsheim	8.87	48.8	18.05.2012	Höfer. H.	Meyer. F.	ethanol 70%	SMNKARA08163
SMNK-ARA 08164. ZFMK-DNA-100415532	Araneae	Lycosidae	Pardosa lugubris	female	adult	Germany	Baden-Württemberg	Heimsheim	8.87	48.8	18.05.2012	Höfer. H.	Meyer. F.	ethanol 70%	SMNKARA08164
SMNK-ARA 08165. ZFMK-DNA-100415531	Araneae	Lycosidae	Pardosa lugubris	female	adult	Germany	Baden-Württemberg	Heimsheim	8.87	48.8	18.05.2012	Höfer. H.	Meyer. F.	ethanol 70%	SMNKARA08165
SMNK-ARA 08166. ZFMK-DNA-100415953	Araneae	Lycosidae	Pardosa lugubris	male	adult	Germany	Baden-Württemberg	Heimsheim	8.87	48.8	18.05.2012	Höfer. H.	Meyer. F.	ethanol 70%	SMNKARA08166
SMNK-ARA 08167. ZFMK-DNA-100415529	Araneae	Lycosidae	Pardosa lugubris	male	adult	Germany	Baden-Württemberg	Heimsheim	8.87	48.8	18.05.2012	Höfer. H.	Meyer. F.	ethanol 70%	SMNKARA08167
SMNK-ARA 08168. ZFMK-DNA-100415528	Araneae	Lycosidae	Pardosa lugubris	male	adult	Germany	Baden-Württemberg	Heimsheim	8.87	48.8	18.05.2012	Höfer. H.	Meyer. F.	ethanol 70%	SMNKARA08168
SMNK-ARA 08169. ZFMK-DNA-100415527	Araneae	Lycosidae	Pardosa pullata	male	adult	Germany	Baden-Württemberg	Heimsheim	8.87	48.8	18.05.2012	Höfer. H.	Meyer. F.	ethanol 70%	SMNKARA08169
SMNK-ARA 08170. ZFMK-DNA-100415526	Araneae	Lycosidae	Pardosa pullata	female	adult	Germany	Baden-Württemberg	Heimsheim	8.87	48.8	18.05.2012	Höfer. H.	Meyer. F.	ethanol 70%	SMNKARA08170
SMNK-ARA 08171. ZFMK-DNA-100415525	Araneae	Lycosidae	Pardosa hortensis	female	adult	Germany	Baden-Württemberg	Heimsheim	8.87	48.8	18.05.2012	Höfer. H.	Meyer. F.	ethanol 70%	SMNKARA08171
SMNK-ARA 08172. ZFMK-DNA-100415524	Araneae	Lycosidae	Pardosa hortensis	female	adult	Germany	Baden-Württemberg	Heimsheim	8.87	48.8	18.05.2012	Höfer. H.	Meyer. F.	ethanol 70%	SMNKARA08172
SMNK-ARA 08174. ZFMK-DNA-100416376	Araneae	Lycosidae	Pardosa hortensis	female	adult	Germany	Baden-Württemberg	Keltern	8.58	48.89	18.05.2012	Höfer. H.	Höfer. H.	ethanol 70%	SMNKARA08174
SMNK-ARA 08175. ZFMK-DNA-100415512	Araneae	Lycosidae	Pardosa hortensis	female	adult	Germany	Baden-Württemberg	Keltern	8.58	48.89	18.05.2012	Höfer. H.	Höfer. H.	ethanol 70%	SMNKARA08175
SMNK-ARA 08176. ZFMK-DNA-100415513	Araneae	Lycosidae	Pardosa pullata	female	adult	Germany	Baden-Württemberg	Keltern	8.58	48.89	18.05.2012	Höfer. H.	Höfer. H.	ethanol 70%	SMNKARA08176
SMNK-ARA 08178. ZFMK-DNA-100415515	Araneae	Lycosidae	Pardosa pullata	female	adult	Germany	Baden-Württemberg	Keltern	8.58	48.89	18.05.2012	Höfer. H.	Höfer. H.	ethanol 70%	SMNKARA08178
SMNK-ARA 08179. ZFMK-DNA-100415516	Araneae	Lycosidae	Pardosa pullata	female	adult	Germany	Baden-Württemberg	Keltern	8.58	48.89	18.05.2012	Höfer. H.	Höfer. H.	ethanol 70%	SMNKARA08179
SMNK-ARA 08182. ZFMK-DNA-100415519	Araneae	Lycosidae	Pardosa pullata	female	adult	Germany	Baden-Württemberg	Keltern	8.58	48.89	18.05.2012	Höfer. H.	Höfer. H.	ethanol 70%	SMNKARA08182
SMNK-ARA 08183. ZFMK-DNA-100415520	Araneae	Lycosidae	Pardosa pullata	female	adult	Germany	Baden-Württemberg	Keltern	8.58	48.89	18.05.2012	Höfer. H.	Höfer. H.	ethanol 70%	SMNKARA08183
SMNK-ARA 08184. ZFMK-DNA-100415521	Araneae	Lycosidae	Pardosa pullata	female	adult	Germany	Baden-Württemberg	Keltern	8.58	48.89	18.05.2012	Höfer. H.	Höfer. H.	ethanol 70%	SMNKARA08184
SMNK-ARA 08185. ZFMK-DNA-100416028	Araneae	Lycosidae	Pardosa pullata	female	adult	Germany	Baden-Württemberg	Keltern	8.58	48.89	18.05.2012	Höfer. H.	Höfer. H.	ethanol 70%	SMNKARA08185
SMNK-ARA 08186. ZFMK-DNA-100415510	Araneae	Lycosidae	Pardosa pullata	female	adult	Germany	Baden-Württemberg	Keltern	8.58	48.89	18.05.2012	Höfer. H.	Höfer. H.	ethanol 70%	SMNKARA08186
SMNK-ARA 08187. ZFMK-DNA-100415509	Araneae	Lycosidae	Pardosa palustris	female	adult	Germany	Baden-Württemberg	Keltern	8.58	48.89	18.05.2012	Höfer. H.	Höfer. H.	ethanol 70%	SMNKARA08187
SMNK-ARA 08188. ZFMK-DNA-100415508	Araneae	Lycosidae	Aulonia albimana	female	adult	Germany	Baden-Württemberg	Keltern	8.58	48.89	18.05.2012	Höfer. H.	Höfer. H.	ethanol 70%	SMNKARA08188
SMNK-ARA 08189. ZFMK-DNA-100416339	Araneae	Pisauridae	Pisaura mirabilis	female	adult	Germany	Baden-Württemberg	Keltern	8.58	48.89	18.05.2012	Höfer. H.	Höfer. H.	ethanol 70%	SMNKARA08189
SMNK-ARA 08190. ZFMK-DNA-100415506	Araneae	Pisauridae	Pisaura mirabilis	female	adult	Germany	Baden-Württemberg	Keltern	8.58	48.89	18.05.2012	Höfer. H.	Höfer. H.	ethanol 70%	SMNKARA08190
SMNK-ARA 08191. ZFMK-DNA-100415505	Araneae	Pisauridae	Pisaura mirabilis	female	adult	Germany	Baden-Württemberg	Heimsheim	8.87	48.8	18.05.2012	Höfer. H.	Meyer. F.	ethanol 70%	SMNKARA08191
SMNK-ARA 08192. ZFMK-DNA-100415504	Araneae	Lycosidae	Alopecosa cuneata	male	adult	Germany	Baden-Württemberg	Heimsheim	8.87	48.8	18.05.2012	Höfer. H.	Meyer. F.	ethanol 70%	SMNKARA08192
SMNK-ARA 08193. ZFMK-DNA-100415503	Araneae	Lycosidae	Alopecosa cuneata	female	adult	Germany	Baden-Württemberg	Heimsheim	8.87	48.8	23.03.2012	Höfer. H.	Meyer. F.	ethanol 70%	SMNKARA08193
SMNK-ARA 08194. ZFMK-DNA-100415502	Araneae	Salticidae	Evarcha falcata	male	adult	Germany	Baden-Württemberg	Heimsheim	8.87	48.8	18.05.2012	Höfer. H.	Meyer. F.	ethanol 70%	SMNKARA08194
SMNK-ARA 08196. ZFMK-DNA-100415500	Araneae	Gnaphosidae	Trachyzelotes pedestris	female	adult	Germany	Baden-Württemberg	Heimsheim	8.87	48.8	18.05.2012	Höfer. H.	Meyer. F.	ethanol 70%	SMNKARA08196
SMNK-ARA 08197. ZFMK-DNA-100416025	Araneae	Gnaphosidae	Callilepis nocturna	female	adult	Germany	Baden-Württemberg	Heimsheim	8.87	48.8	18.05.2012	Höfer. H.	Meyer. F.	ethanol 70%	SMNKARA08197
SMNK-ARA 08198. ZFMK-DNA-100416352	Araneae	Araneidae	Araneus triguttatus	female	adult	Germany	Baden-Württemberg	Heimsheim	8.87	48.8	18.05.2012	Höfer. H.	Meyer. F.	ethanol 70%	SMNKARA08198
SMNK-ARA 08200. ZFMK-DNA-100416373	Araneae	Dictynidae	Dictyna arundinacea	female	adult	Germany	Baden-Württemberg	Heimsheim	8.87	48.8	18.05.2012	Höfer. H.	Meyer. F.	ethanol 70%	SMNKARA08200
SMNK-ARA 08201. ZFMK-DNA-100415490	Araneae	Theridiidae	Asagena phalerata	female	juvenile	Germany	Baden-Württemberg	Heimsheim	8.87	48.8	18.05.2012	Höfer. H.	Meyer. F.	ethanol 70%	SMNKARA08201
SMNK-ARA 08202. ZFMK-DNA-100415491	Araneae	Linyphiidae	Mermessus trilobatus	female	adult	Germany	Baden-Württemberg	Heimsheim	8.87	48.8	18.05.2012	Höfer. H.	Meyer. F.	ethanol 70%	SMNKARA08202
SMNK-ARA 08203. ZFMK-DNA-100415492	Araneae	Theridiidae	Platnickina tincta	female	adult	Germany	Baden-Württemberg	Heimsheim	8.87	48.8	18.05.2012	Höfer. H.	Meyer. F.	ethanol 70%	SMNKARA08203
SMNK-ARA 08204. ZFMK-DNA-100415493	Araneae	Thomisidae	Xysticus cristatus	female	adult	Germany	Baden-Württemberg	Heimsheim	8.87	48.8	18.05.2012	Höfer. H.	Meyer. F.	ethanol 70%	SMNKARA08204
SMNK-ARA 08205. ZFMK-DNA-100415494	Araneae	Thomisidae	Xysticus cristatus	male	adult	Germany	Baden-Württemberg	Heimsheim	8.87	48.8	18.05.2012	Höfer. H.	Meyer. F.	ethanol 70%	SMNKARA08205
SMNK-ARA 08206. ZFMK-DNA-100415495	Araneae	Thomisidae	Diaea dorsata	female	juvenile	Germany	Baden-Württemberg	Heimsheim	8.87	48.8	18.05.2012	Höfer. H.	Meyer. F.	ethanol 70%	SMNKARA08206
SMNK-ARA 08207. ZFMK-DNA-100415496	Araneae	Araneidae	Aculepeira ceropegia	male	juvenile	Germany	Baden-Württemberg	Heimsheim	8.87	48.8	18.05.2012	Höfer. H.	Meyer. F.	ethanol 70%	SMNKARA08207
SMNK-ARA 08208. ZFMK-DNA-100415497	Araneae	Araneidae	Araniella cucurbitina	male	adult	Germany	Baden-Württemberg	Heimsheim	8.87	48.8	18.05.2012	Höfer. H.	Meyer. F.	ethanol 70%	SMNKARA08208
SMNK-ARA 08209. ZFMK-DNA-100416002	Araneae	Araneidae	Araniella cucurbitina	female	juvenile	Germany	Baden-Württemberg	Heimsheim	8.87	48.8	18.05.2012	Höfer. H.	Meyer. F.	ethanol 70%	SMNKARA08209
SMNK-ARA 08210. ZFMK-DNA-100415486	Araneae	Thomisidae	Xysticus cristatus	female	adult	Germany	Baden-Württemberg	Keltern	8.58	48.89	18.05.2012	Höfer. H.	Meyer. F.	ethanol 70%	SMNKARA08210
SMNK-ARA 08211. ZFMK-DNA-100415485	Araneae	Thomisidae	Xysticus cristatus	male	adult	Germany	Baden-Württemberg	Keltern	8.58	48.89	18.05.2012	Höfer. H.	Meyer. F.	ethanol 70%	SMNKARA08211
SMNK-ARA 08212. ZFMK-DNA-100415484	Araneae	Philodromidae	Tibellus oblongus	female	adult	Germany	Baden-Württemberg	Keltern	8.58	48.89	18.05.2012	Höfer. H.	Meyer. F.	ethanol 70%	SMNKARA08212
SMNK-ARA 08213. ZFMK-DNA-100415483	Araneae	Oxyopidae	Oxyopes ramosus	male	adult	Germany	Baden-Württemberg	Keltern	8.58	48.89	18.05.2012	Höfer. H.	Meyer. F.	ethanol 70%	SMNKARA08213
SMNK-ARA 08214. ZFMK-DNA-100415482	Araneae	Thomisidae	Xysticus lanio	female	adult	Germany	Baden-Württemberg	Keltern	8.58	48.89	18.05.2012	Höfer. H.	Meyer. F.	ethanol 70%	SMNKARA08214
SMNK-ARA 08215. ZFMK-DNA-100415481	Araneae	Salticidae	Evarcha arcuata	male	adult	Germany	Baden-Württemberg	Keltern	8.58	48.89	18.05.2012	Höfer. H.	Meyer. F.	ethanol 70%	SMNKARA08215
SMNK-ARA 08216. ZFMK-DNA-100415480	Araneae	Salticidae	Evarcha arcuata	female	adult	Germany	Baden-Württemberg	Keltern	8.58	48.89	18.05.2012	Höfer. H.	Meyer. F.	ethanol 70%	SMNKARA08216
SMNK-ARA 08217. ZFMK-DNA-100415479	Araneae	Salticidae	Evarcha arcuata	male	juvenile	Germany	Baden-Württemberg	Keltern	8.58	48.89	18.05.2012	Höfer. H.	Meyer. F.	ethanol 70%	SMNKARA08217
SMNK-ARA 08218. ZFMK-DNA-100415478	Araneae	Salticidae	Heliophanus cupreus	male	adult	Germany	Baden-Württemberg	Keltern	8.58	48.89	18.05.2012	Höfer. H.	Meyer. F.	ethanol 70%	SMNKARA08218
SMNK-ARA 08219. ZFMK-DNA-100415477	Araneae	Atypidae	Atypus piceus	female	adult	Germany	Baden-Württemberg	Keltern	8.58	48.89	18.05.2012	Höfer. H.	Meyer. F.	ethanol 70%	SMNKARA08219
SMNK-ARA 08220. ZFMK-DNA-100415476	Araneae	Lycosidae	Trochosa terricola	male	adult	Germany	Baden-Württemberg	Karlsruhe	8.48	48.97	23.03.2012	Höfer. H.	Höfer. H.	ethanol 70%	SMNKARA08220
SMNK-ARA 08221. ZFMK-DNA-100416000	Araneae	Lycosidae	Trochosa terricola	male	adult	Germany	Baden-Württemberg	Karlsruhe	8.48	48.97	23.03.2012	Höfer. H.	Höfer. H.	ethanol 70%	SMNKARA08221
SMNK-ARA 08222. ZFMK-DNA-100415463	Araneae	Lycosidae	Alopecosa cuneata	male	adult	Germany	Baden-Württemberg	Karlsruhe	8.48	48.97	23.03.2012	Höfer. H.	Höfer. H.	ethanol 70%	SMNKARA08222
SMNK-ARA 08224. ZFMK-DNA-100415465	Araneae	Lycosidae	Alopecosa striatipes	female	adult	Germany	Baden-Württemberg	Sandweier	8.19	48.83	30.05.2011	Hemm. V.	Meyer. F.	propylene glycol	SMNKARA08224
SMNK-ARA 08225. ZFMK-DNA-100415466	Araneae	Lycosidae	Pardosa agrestis	female	adult	Germany	Baden-Württemberg	Sandweier	8.19	48.83	30.05.2011	Hemm. V.	Meyer. F.	propylene glycol	SMNKARA08225
SMNK-ARA 08226. ZFMK-DNA-100415467	Araneae	Lycosidae	Xerolycosa miniata	female	adult	Germany	Baden-Württemberg	Sandweier	8.19	48.83	30.05.2011	Hemm. V.	Meyer. F.	propylene glycol	SMNKARA08226
SMNK-ARA 08227. ZFMK-DNA-100415468	Araneae	Lycosidae	Xerolycosa miniata	female	adult	Germany	Baden-Württemberg	Sandweier	8.19	48.83	30.05.2011	Hemm. V.	Meyer. F.	propylene glycol	SMNKARA08227
SMNK-ARA 08228. ZFMK-DNA-100415469	Araneae	Lycosidae	Xerolycosa miniata	female	adult	Germany	Baden-Württemberg	Sandweier	8.19	48.83	30.05.2011	Hemm. V.	Meyer. F.	propylene glycol	SMNKARA08228
SMNK-ARA 08229. ZFMK-DNA-100415470	Araneae	Lycosidae	Xerolycosa miniata	female	adult	Germany	Baden-Württemberg	Sandweier	8.19	48.83	30.05.2011	Hemm. V.	Meyer. F.	propylene glycol	SMNKARA08229
SMNK-ARA 08230. ZFMK-DNA-100415471	Araneae	Lycosidae	Xerolycosa miniata	male	adult	Germany	Baden-Württemberg	Sandweier	8.19	48.83	30.05.2011	Hemm. V.	Meyer. F.	propylene glycol	SMNKARA08230
SMNK-ARA 08231. ZFMK-DNA-100415951	Araneae	Lycosidae	Xerolycosa miniata	male	adult	Germany	Baden-Württemberg	Sandweier	8.19	48.83	30.05.2011	Hemm. V.	Meyer. F.	propylene glycol	SMNKARA08231
SMNK-ARA 08232. ZFMK-DNA-100415952	Araneae	Lycosidae	Xerolycosa miniata	male	adult	Germany	Baden-Württemberg	Sandweier	8.19	48.83	30.05.2011	Hemm. V.	Meyer. F.	propylene glycol	SMNKARA08232
SMNK-ARA 08233. ZFMK-DNA-100425649	Araneae	Lycosidae	Xerolycosa miniata	male	adult	Germany	Baden-Württemberg	Sandweier	8.19	48.83	30.05.2011	Hemm. V.	Meyer. F.	propylene glycol	SMNKARA08233
SMNK-ARA 08234. ZFMK-DNA-100425661	Araneae	Lycosidae	Alopecosa striatipes	male	adult	Germany	Baden-Württemberg	Sandweier	8.19	48.82	28.03.2011	Höfer. H.	Höfer. H.	ethanol 70%	SMNKARA08234
SMNK-ARA 08236. ZFMK-DNA-100425650	Araneae	Lycosidae	Alopecosa fabrilis	female	adult	Germany	Baden-Württemberg	Sandhausen	8.66	49.33	04.04.2011	Hemm. V.	Höfer. H.	ethanol 70%	SMNKARA08236
SMNK-ARA 08237. ZFMK-DNA-100425662	Araneae	Dysderidae	Dysdera crocata	female	adult	Germany	Baden-Württemberg	Karlsruhe	8.4	49.01	08.04.2011	Girsch. S.	Höfer. H.	ethanol 70%	SMNKARA08237
SMNK-ARA 08238. ZFMK-DNA-100424394	Araneae	Lycosidae	Aulonia albimana	male	adult	Germany	Baden-Württemberg	Keltern	8.58	48.89	18.05.2011	Höfer. H.	Höfer. H.	ethanol 70%	SMNKARA08238
SMNK-ARA 08239. ZFMK-DNA-100424410	Araneae	Lycosidae	Alopecosa pulverulenta	male	adult	Germany	Baden-Württemberg	Hornisgrinde	8.21	48.6	20.05.2012	Höfer. H.	Höfer. H.	ethanol 70%	SMNKARA08239
SMNK-ARA 08240. ZFMK-DNA-100424408	Araneae	Lycosidae	Pardosa agrestis	male	adult	Germany	Baden-Württemberg	Hohenwettersbach	8.48	48.97	26.05.2012	Höfer. H.	Höfer. H.	ethanol 70%	SMNKARA08240
SMNK-ARA 08241. ZFMK-DNA-100424400	Araneae	Lycosidae	Pardosa amentata	female	adult	Germany	Baden-Württemberg	Schliffkopf	8.22	48.53	30.05.2012	Höfer. H.	Höfer. H.	ethanol 70%	SMNKARA08241
SMNK-ARA 08243. ZFMK-DNA-100424396	Araneae	Araneidae	Araniella cucurbitina	female	adult	Germany	Baden-Württemberg	Karlsruhe	8.48	48.97	31.05.2012	Höfer. H.	Höfer. H.	ethanol 70%	SMNKARA08243
SMNK-ARA 08245. ZFMK-DNA-100428111	Araneae	Philodromidae	Philodromus albidus	female	juvenile	Germany	Baden-Württemberg	Karlsruhe	8.48	48.97	31.05.2012	Höfer. H.	Höfer. H.	ethanol 70%	SMNKARA08245
SMNK-ARA 08246. ZFMK-DNA-100428112	Araneae	Philodromidae	Philodromus cespitum	female	juvenile	Germany	Baden-Württemberg	Karlsruhe	8.48	48.97	31.05.2012	Höfer. H.	Höfer. H.	ethanol 70%	SMNKARA08246
SMNK-ARA 08247. ZFMK-DNA-100425641	Araneae	Thomisidae	Ozyptila praticola	female	juvenile	Germany	Baden-Württemberg	Karlsruhe	8.48	48.97	31.05.2012	Höfer. H.	Höfer. H.	ethanol 70%	SMNKARA08247
SMNK-ARA 08250. ZFMK-DNA-100428116	Araneae	Linyphiidae	Tenuiphantes tenuis	female	juvenile	Germany	Baden-Württemberg	Karlsruhe	8.48	48.97	31.05.2012	Höfer. H.	Höfer. H.	ethanol 70%	SMNKARA08250
SMNK-ARA 08252. ZFMK-DNA-100428118	Araneae	Linyphiidae	Styloctetor romanus	female	adult	Germany	Baden-Württemberg	Sandweier	8.19	48.83	30.05.2011	Hemm. V.	Meyer. F.	propylene glycol	SMNKARA08252
SMNK-ARA 08254. ZFMK-DNA-100424395	Araneae	Linyphiidae	Styloctetor romanus	male	adult	Germany	Baden-Württemberg	Sandweier	8.19	48.83	24.05.2011	Hemm. V.	Meyer. F.	propylene glycol	SMNKARA08254
SMNK-ARA 08255. ZFMK-DNA-100428121	Araneae	Linyphiidae	Styloctetor romanus	female	adult	Germany	Baden-Württemberg	Sandweier	8.19	48.83	24.05.2011	Hemm. V.	Meyer. F.	propylene glycol	SMNKARA08255
SMNK-ARA 08256. ZFMK-DNA-100428122	Araneae	Linyphiidae	Styloctetor romanus	female	adult	Germany	Baden-Württemberg	Sandweier	8.19	48.82	24.05.2011	Hemm. V.	Meyer. F.	propylene glycol	SMNKARA08256
SMNK-ARA 08259. ZFMK-DNA-100425665	Araneae	Theridiidae	Asagena phalerata	male	adult	Germany	Baden-Württemberg	Sandweier	8.19	48.83	24.05.2011	Hemm. V.	Meyer. F.	propylene glycol	SMNKARA08259
SMNK-ARA 08260. ZFMK-DNA-100428107	Araneae	Theridiidae	Asagena phalerata	male	adult	Germany	Baden-Württemberg	Sandweier	8.19	48.83	24.05.2011	Hemm. V.	Meyer. F.	propylene glycol	SMNKARA08260
SMNK-ARA 08261. ZFMK-DNA-100425673	Araneae	Theridiidae	Asagena phalerata	male	adult	Germany	Baden-Württemberg	Sandweier	8.19	48.82	24.05.2011	Hemm. V.	Meyer. F.	propylene glycol	SMNKARA08261
SMNK-ARA 08262. ZFMK-DNA-100428105	Araneae	Theridiidae	Asagena phalerata	male	adult	Germany	Baden-Württemberg	Sandweier	8.19	48.82	24.05.2011	Hemm. V.	Meyer. F.	propylene glycol	SMNKARA08262
SMNK-ARA 08263. ZFMK-DNA-100428104	Araneae	Theridiidae	Asagena phalerata	male	adult	Germany	Baden-Württemberg	Sandweier	8.19	48.82	24.05.2011	Hemm. V.	Meyer. F.	propylene glycol	SMNKARA08263
SMNK-ARA 08264. ZFMK-DNA-100428103	Araneae	Theridiidae	Asagena phalerata	male	adult	Germany	Baden-Württemberg	Sandweier	8.19	48.83	24.05.2011	Hemm. V.	Meyer. F.	propylene glycol	SMNKARA08264
SMNK-ARA 08265. ZFMK-DNA-100428102	Araneae	Theridiidae	Asagena phalerata	male	adult	Germany	Baden-Württemberg	Sandweier	8.19	48.83	24.05.2011	Hemm. V.	Meyer. F.	propylene glycol	SMNKARA08265
SMNK-ARA 08266. ZFMK-DNA-100428101	Araneae	Theridiidae	Steatoda albomaculata	male	adult	Germany	Baden-Württemberg	Sandweier	8.19	48.83	24.05.2011	Hemm. V.	Meyer. F.	propylene glycol	SMNKARA08266
SMNK-ARA 08267. ZFMK-DNA-100428100	Araneae	Theridiidae	Steatoda albomaculata	male	adult	Germany	Baden-Württemberg	Sandweier	8.19	48.83	24.05.2011	Hemm. V.	Meyer. F.	propylene glycol	SMNKARA08267
SMNK-ARA 08268. ZFMK-DNA-100428099	Araneae	Theridiidae	Steatoda albomaculata	male	adult	Germany	Baden-Württemberg	Sandweier	8.19	48.83	24.05.2011	Hemm. V.	Meyer. F.	propylene glycol	SMNKARA08268
SMNK-ARA 08269. ZFMK-DNA-100428087	Araneae	Theridiidae	Steatoda albomaculata	male	adult	Germany	Baden-Württemberg	Sandweier	8.19	48.82	24.05.2011	Hemm. V.	Meyer. F.	propylene glycol	SMNKARA08269
SMNK-ARA 08270. ZFMK-DNA-100425660	Araneae	Theridiidae	Steatoda albomaculata	male	adult	Germany	Baden-Württemberg	Sandweier	8.19	48.82	24.05.2011	Hemm. V.	Meyer. F.	propylene glycol	SMNKARA08270
SMNK-ARA 08271. ZFMK-DNA-100428089	Araneae	Theridiidae	Euryopis quinqueguttata	female	adult	Germany	Baden-Württemberg	Sandhausen	8.66	49.33	30.05.2011	Hemm. V.	Meyer. F.	propylene glycol	SMNKARA08271
SMNK-ARA 08272. ZFMK-DNA-100428090	Araneae	Theridiidae	Euryopis quinqueguttata	female	adult	Germany	Baden-Württemberg	Sandhausen	8.66	49.33	30.05.2011	Hemm. V.	Meyer. F.	propylene glycol	SMNKARA08272
SMNK-ARA 08273. ZFMK-DNA-100428091	Araneae	Theridiidae	Euryopis quinqueguttata	female	adult	Germany	Baden-Württemberg	Sandhausen	8.66	49.33	30.05.2011	Hemm. V.	Meyer. F.	propylene glycol	SMNKARA08273
SMNK-ARA 08276. ZFMK-DNA-100428094	Araneae	Salticidae	Aelurillus v-insignitus	male	adult	Germany	Baden-Württemberg	Sandweier	8.19	48.82	24.05.2011	Hemm. V.	Meyer. F.	propylene glycol	SMNKARA08276
SMNK-ARA 08288. ZFMK-DNA-100428079	Araneae	Salticidae	Sitticus saltator	female	adult	Germany	Baden-Württemberg	Sandweier	8.19	48.83	24.05.2011	Hemm. V.	Meyer. F.	propylene glycol	SMNKARA08288
SMNK-ARA 08289. ZFMK-DNA-100428078	Araneae	Titanoecidae	Titanoeca psammophila	male	adult	Germany	Baden-Württemberg	Sandhausen	8.66	49.33	24.05.2011	Hemm. V.	Meyer. F.	propylene glycol	SMNKARA08289
SMNK-ARA 08290. ZFMK-DNA-100428077	Araneae	Titanoecidae	Titanoeca psammophila	male	adult	Germany	Baden-Württemberg	Sandhausen	8.66	49.33	24.05.2011	Hemm. V.	Meyer. F.	propylene glycol	SMNKARA08290
SMNK-ARA 08291. ZFMK-DNA-100428076	Araneae	Titanoecidae	Titanoeca psammophila	male	adult	Germany	Baden-Württemberg	Sandhausen	8.66	49.33	24.05.2011	Hemm. V.	Meyer. F.	propylene glycol	SMNKARA08291
SMNK-ARA 08292. ZFMK-DNA-100425711	Araneae	Titanoecidae	Titanoeca psammophila	male	adult	Germany	Baden-Württemberg	Sandhausen	8.66	49.33	24.05.2011	Hemm. V.	Meyer. F.	propylene glycol	SMNKARA08292
SMNK-ARA 08294. ZFMK-DNA-100428064	Araneae	Titanoecidae	Titanoeca psammophila	male	adult	Germany	Baden-Württemberg	Sandhausen	8.66	49.33	24.05.2011	Hemm. V.	Meyer. F.	propylene glycol	SMNKARA08294
SMNK-ARA 08295. ZFMK-DNA-100428065	Araneae	Titanoecidae	Titanoeca psammophila	male	adult	Germany	Baden-Württemberg	Sandhausen	8.66	49.33	24.05.2011	Hemm. V.	Meyer. F.	propylene glycol	SMNKARA08295
SMNK-ARA 08296. ZFMK-DNA-100428066	Araneae	Titanoecidae	Titanoeca psammophila	male	adult	Germany	Baden-Württemberg	Sandhausen	8.66	49.33	24.05.2011	Hemm. V.	Meyer. F.	propylene glycol	SMNKARA08296
SMNK-ARA 08297. ZFMK-DNA-100428067	Araneae	Titanoecidae	Titanoeca psammophila	male	adult	Germany	Baden-Württemberg	Sandhausen	8.66	49.33	30.05.2011	Hemm. V.	Meyer. F.	propylene glycol	SMNKARA08297
SMNK-ARA 08298. ZFMK-DNA-100425687	Araneae	Titanoecidae	Titanoeca psammophila	male	adult	Germany	Baden-Württemberg	Sandhausen	8.66	49.33	30.05.2011	Hemm. V.	Meyer. F.	propylene glycol	SMNKARA08298
SMNK-ARA 08299. ZFMK-DNA-100428069	Araneae	Titanoecidae	Titanoeca psammophila	male	adult	Germany	Baden-Württemberg	Sandhausen	8.66	49.33	30.05.2011	Hemm. V.	Meyer. F.	propylene glycol	SMNKARA08299
SMNK-ARA 08300. ZFMK-DNA-100428070	Araneae	Titanoecidae	Titanoeca psammophila	male	adult	Germany	Baden-Württemberg	Sandhausen	8.66	49.33	30.05.2011	Hemm. V.	Meyer. F.	propylene glycol	SMNKARA08300
SMNK-ARA 08301. ZFMK-DNA-100428071	Araneae	Titanoecidae	Titanoeca psammophila	male	adult	Germany	Baden-Württemberg	Sandhausen	8.66	49.33	30.05.2011	Hemm. V.	Meyer. F.	propylene glycol	SMNKARA08301
SMNK-ARA 08303. ZFMK-DNA-100428073	Araneae	Zodariidae	Zodarion rubidum	male	adult	Germany	Baden-Württemberg	Sandhausen	8.66	49.33	24.05.2011	Hemm. V.	Meyer. F.	propylene glycol	SMNKARA08303
SMNK-ARA 08304. ZFMK-DNA-100425710	Araneae	Titanoecidae	Titanoeca psammophila	female	adult	Germany	Baden-Württemberg	Sandhausen	8.66	49.33	24.05.2011	Hemm. V.	Meyer. F.	propylene glycol	SMNKARA08304
SMNK-ARA 08305. ZFMK-DNA-100428062	Araneae	Gnaphosidae	Haplodrassus dalmatensis	male	adult	Germany	Baden-Württemberg	Karlsruhe	8.38	49.03	24.05.2011	Hemm. V.	Meyer. F.	propylene glycol	SMNKARA08305
SMNK-ARA 08306. ZFMK-DNA-100428061	Araneae	Gnaphosidae	Haplodrassus dalmatensis	female	adult	Germany	Baden-Württemberg	Karlsruhe	8.38	49.03	24.05.2011	Hemm. V.	Meyer. F.	propylene glycol	SMNKARA08306
SMNK-ARA 08307. ZFMK-DNA-100428060	Araneae	Gnaphosidae	Haplodrassus dalmatensis	female	adult	Germany	Baden-Württemberg	Karlsruhe	8.38	49.03	24.05.2011	Hemm. V.	Meyer. F.	propylene glycol	SMNKARA08307
SMNK-ARA 08308. ZFMK-DNA-100428059	Araneae	Gnaphosidae	Haplodrassus dalmatensis	male	adult	Germany	Baden-Württemberg	Karlsruhe	8.38	49.03	30.05.2011	Hemm. V.	Meyer. F.	propylene glycol	SMNKARA08308
SMNK-ARA 08310. ZFMK-DNA-100428057	Araneae	Gnaphosidae	Haplodrassus dalmatensis	male	adult	Germany	Baden-Württemberg	Sandweier	8.19	48.83	24.05.2011	Hemm. V.	Meyer. F.	propylene glycol	SMNKARA08310
SMNK-ARA 08312. ZFMK-DNA-100428055	Araneae	Gnaphosidae	Haplodrassus dalmatensis	male	adult	Germany	Baden-Württemberg	Sandweier	8.19	48.83	24.05.2011	Hemm. V.	Meyer. F.	propylene glycol	SMNKARA08312
SMNK-ARA 08313. ZFMK-DNA-100428054	Araneae	Gnaphosidae	Haplodrassus dalmatensis	male	adult	Germany	Baden-Württemberg	Sandweier	8.19	48.82	24.05.2011	Hemm. V.	Meyer. F.	propylene glycol	SMNKARA08313
SMNK-ARA 08314. ZFMK-DNA-100428053	Araneae	Gnaphosidae	Haplodrassus dalmatensis	male	adult	Germany	Baden-Württemberg	Sandweier	8.19	48.82	24.05.2011	Hemm. V.	Meyer. F.	propylene glycol	SMNKARA08314
SMNK-ARA 08315. ZFMK-DNA-100428052	Araneae	Gnaphosidae	Haplodrassus dalmatensis	male	adult	Germany	Baden-Württemberg	Sandweier	8.19	48.83	30.05.2011	Hemm. V.	Meyer. F.	propylene glycol	SMNKARA08315
SMNK-ARA 08316. ZFMK-DNA-100425734	Araneae	Gnaphosidae	Haplodrassus signifer	male	adult	Germany	Baden-Württemberg	Sandweier	8.19	48.83	24.05.2011	Hemm. V.	Meyer. F.	propylene glycol	SMNKARA08316
SMNK-ARA 08317. ZFMK-DNA-100428039	Araneae	Gnaphosidae	Haplodrassus signifer	male	adult	Germany	Baden-Württemberg	Sandhausen	8.66	49.33	30.05.2011	Hemm. V.	Meyer. F.	propylene glycol	SMNKARA08317
SMNK-ARA 08318. ZFMK-DNA-100428040	Araneae	Gnaphosidae	Zelotes electus	male	adult	Germany	Baden-Württemberg	Sandweier	8.19	48.83	24.05.2011	Hemm. V.	Meyer. F.	propylene glycol	SMNKARA08318
SMNK-ARA 08319. ZFMK-DNA-100428041	Araneae	Gnaphosidae	Zelotes electus	male	adult	Germany	Baden-Württemberg	Sandweier	8.19	48.82	24.05.2011	Hemm. V.	Meyer. F.	propylene glycol	SMNKARA08319
SMNK-ARA 08320. ZFMK-DNA-100428042	Araneae	Gnaphosidae	Zelotes electus	male	adult	Germany	Baden-Württemberg	Sandweier	8.19	48.82	24.05.2011	Hemm. V.	Meyer. F.	propylene glycol	SMNKARA08320
SMNK-ARA 08321. ZFMK-DNA-100428043	Araneae	Gnaphosidae	Zelotes electus	female	adult	Germany	Baden-Württemberg	Karlsruhe	8.38	49.03	31.05.2011	Hemm. V.	Meyer. F.	propylene glycol	SMNKARA08321
SMNK-ARA 08327. ZFMK-DNA-100428049	Araneae	Lycosidae	Alopecosa fabrilis	female	adult	Germany	Baden-Württemberg	Sandhausen	8.66	49.33	24.05.2011	Hemm. V.	Meyer. F.	propylene glycol	SMNKARA08327
SMNK-ARA 08328	Araneae	Lycosidae	Arctosa lutetiana	female	adult	Germany	Baden-Württemberg	Sandhausen	8.66	49.33	30.05.2011	Hemm. V.	Meyer. F.	propylene glycol	SMNKARA08328
SMNK-ARA 08329	Araneae	Lycosidae	Pardosa lugubris	female	adult	Germany	Baden-Württemberg	Karlsruhe	8.48	48.97	06.05.2012	Höfer. H.	Höfer. H.	propylene glycol	SMNKARA08329
SMNK-ARA 08330	Araneae	Liocranidae	Agroeca proxima	male	adult	Germany	Baden-Württemberg	Schliffkopf	8.22	48.55	01.10.2012	Höfer. H.	Meyer. F.	propylene glycol	SMNKARA08330
SMNK-ARA 08331	Araneae	Liocranidae	Agroeca proxima	female	adult	Germany	Baden-Württemberg	Schliffkopf	8.22	48.55	29.10.2012	Höfer. H.	Meyer. F.	propylene glycol	SMNKARA08331
SMNK-ARA 08332	Araneae	Lycosidae	Xerolycosa nemoralis	female	adult	Germany	Baden-Württemberg	Schliffkopf	8.22	48.55	10.07.2012	Höfer. H.	Meyer. F.	propylene glycol	SMNKARA08332
SMNK-ARA 08333	Araneae	Lycosidae	Xerolycosa nemoralis	male	adult	Germany	Baden-Württemberg	Schliffkopf	8.22	48.55	10.07.2012	Höfer. H.	Meyer. F.	propylene glycol	SMNKARA08333
SMNK-ARA 08334	Araneae	Lycosidae	Xerolycosa nemoralis	female	adult	Germany	Baden-Württemberg	Schliffkopf	8.22	48.55	10.07.2012	Höfer. H.	Meyer. F.	propylene glycol	SMNKARA08334
SMNK-ARA 08335	Araneae	Lycosidae	Xerolycosa nemoralis	male	adult	Germany	Baden-Württemberg	Schliffkopf	8.22	48.55	25.06.2012	Höfer. H.	Meyer. F.	propylene glycol	SMNKARA08335
SMNK-ARA 08336	Araneae	Lycosidae	Xerolycosa nemoralis	male	adult	Germany	Baden-Württemberg	Schliffkopf	8.22	48.55	10.06.2012	Höfer. H.	Meyer. F.	propylene glycol	SMNKARA08336
SMNK-ARA 08337	Araneae	Lycosidae	Pardosa hortensis	female	adult	Germany	Baden-Württemberg	Sandweier	8.19	48.83	24.05.2011	Hemm. V.	Meyer. F.	propylene glycol	SMNKARA08337
SMNK-ARA 08339	Araneae	Eresidae	Eresus kollari		juvenile	Germany	Baden-Württemberg	Sandhausen	8.66	49.33	20.09.2011	Höfer. H.	Hemm. V.	ethanol 70%	SMNKARA08339
SMNK-ARA 08340	Araneae	Eresidae	Eresus kollari	male	adult	Germany	Baden-Württemberg	Sandhausen	8.66	49.33	20.09.2011	Höfer. H.	Hemm. V.	ethanol 70%	SMNKARA08340
SMNK-ARA 08341	Araneae	Eresidae	Eresus kollari	male	adult	Germany	Baden-Württemberg	Sandhausen	8.66	49.33	20.09.2011	Höfer. H.	Hemm. V.	ethanol 70%	SMNKARA08341
SMNK-ARA 08342	Araneae	Tetragnathidae	Meta menardi	female	subadult	Germany	Baden-Württemberg	Grabenstetten	9.45	48.52	11.06.2013	Höfer. H.	Höfer. H.	ethanol 70%	SMNKARA08342
SMNK-ARA 08343	Araneae	Tetragnathidae	Meta menardi	male	adult	Germany	Baden-Württemberg	Grabenstetten	9.45	48.52	11.06.2013	Höfer. H.	Höfer. H.	ethanol 70%	SMNKARA08343
SMNK-ARA 08344	Araneae	Tetragnathidae	Meta menardi	male	subadult	Germany	Baden-Württemberg	Grabenstetten	9.45	48.52	11.06.2013	Höfer. H.	Höfer. H.	ethanol 70%	SMNKARA08344
SMNK-ARA 08345	Araneae	Tetragnathidae	Meta menardi	male	subadult	Germany	Baden-Württemberg	Grabenstetten	9.45	48.52	11.06.2013	Höfer. H.	Höfer. H.	ethanol 70%	SMNKARA08345
SMNK-ARA 08346	Araneae	Lycosidae	Alopecosa cursor	female	adult	Germany	Baden-Württemberg	Sandhausen	8.66	49.33	30.05.2011	Hemm. V.	Meyer. F.	propylene glycol	SMNKARA08346
SMNK-ARA 08347	Araneae	Lycosidae	Alopecosa cursor	female	adult	Germany	Baden-Württemberg	Sandhausen	8.66	49.33	24.05.2011	Hemm. V.	Meyer. F.	propylene glycol	SMNKARA08347
SMNK-ARA 08348	Araneae	Thomisidae	Ozyptila claveata	male	adult	Germany	Baden-Württemberg	Karlsruhe	8.38	49.03	24.05.2011	Hemm. V.	Meyer. F.	propylene glycol	SMNKARA08348
SMNK-ARA 08349	Araneae	Thomisidae	Xysticus kochi	female	adult	Germany	Baden-Württemberg	Sandweier	8.19	48.82	24.05.2011	Hemm. V.	Meyer. F.	propylene glycol	SMNKARA08349
SMNK-ARA 08350	Araneae	Salticidae	Aelurillus v-insignitus	male	adult	Germany	Baden-Württemberg	Sandhausen	8.66	49.33	11.04.2011	Höfer. H.	Höfer. H.	ethanol 70%	SMNKARA08350
SMNK-ARA 08351	Araneae	Salticidae	Pellenes nigrociliatus	male	adult	Germany	Baden-Württemberg	Sandhausen	8.66	49.33	11.04.2011	Höfer. H.	Höfer. H.	ethanol 70%	SMNKARA08351
SMNK-ARA 08352	Araneae	Araneidae	Mangora acalypha	male	adult	Germany	Baden-Württemberg	Sandhausen	8.66	49.33	11.04.2011	Höfer. H.	Höfer. H.	ethanol 70%	SMNKARA08352
SMNK-ARA 08353	Araneae	Linyphiidae	Bathyphantes gracilis	male	adult	Germany	Baden-Württemberg	Karlsruhe	8.48	48.97	09.05.2012	Höfer. H.	Meyer. F.	propylene glycol	SMNKARA08353
SMNK-ARA 08354	Araneae	Linyphiidae	Bathyphantes gracilis	female	adult	Germany	Baden-Württemberg	Karlsruhe	8.48	48.97	09.05.2012	Höfer. H.	Meyer. F.	propylene glycol	SMNKARA08354
SMNK-ARA 08355	Araneae	Linyphiidae	Agyneta affinis	male	adult	Germany	Baden-Württemberg	Karlsruhe	8.48	48.97	09.05.2012	Höfer. H.	Meyer. F.	propylene glycol	SMNKARA08355
SMNK-ARA 08357	Araneae	Lycosidae	Alopecosa pulverulenta	male	adult	Germany	Baden-Württemberg	Karlsruhe	8.48	48.97	09.05.2012	Höfer. H.	Meyer. F.	propylene glycol	SMNKARA08357
SMNK-ARA 08380	Araneae	Linyphiidae	Tenuiphantes cristatus	female	adult	Germany	Baden-Württemberg	Schliffkopf	8.22	48.55	02.05.2012	Höfer. H.	Meyer. F.	propylene glycol	SMNKARA08380
SMNK-ARA 08383	Araneae	Linyphiidae	Tenuiphantes cristatus	female	adult	Germany	Baden-Württemberg	Schliffkopf	8.22	48.55	02.05.2012	Höfer. H.	Meyer. F.	propylene glycol	SMNKARA08383
SMNK-ARA 08384	Araneae	Linyphiidae	Walckenaeria obtusa	male	adult	Germany	Baden-Württemberg	Schliffkopf	8.22	48.55	02.05.2012	Höfer. H.	Meyer. F.	propylene glycol	SMNKARA08384
SMNK-ARA 08385	Araneae	Linyphiidae	Walckenaeria obtusa	male	adult	Germany	Baden-Württemberg	Schliffkopf	8.22	48.55	02.05.2012	Höfer. H.	Meyer. F.	propylene glycol	SMNKARA08385
SMNK-ARA 08386	Araneae	Agelenidae	Coelotes terrestris	female	adult	Germany	Baden-Württemberg	Schliffkopf	8.22	48.55	02.05.2012	Höfer. H.	Meyer. F.	propylene glycol	SMNKARA08386
SMNK-ARA 08387	Araneae	Agelenidae	Inermocoelotes inermis	male	adult	Germany	Baden-Württemberg	Schliffkopf	8.22	48.55	02.05.2012	Höfer. H.	Meyer. F.	propylene glycol	SMNKARA08387
SMNK-ARA 08388	Araneae	Agelenidae	Inermocoelotes inermis	male	adult	Germany	Baden-Württemberg	Schliffkopf	8.22	48.55	02.05.2012	Höfer. H.	Meyer. F.	propylene glycol	SMNKARA08388
SMNK-ARA 08389	Araneae	Agelenidae	Inermocoelotes inermis	male	adult	Germany	Baden-Württemberg	Schliffkopf	8.22	48.55	02.05.2012	Höfer. H.	Meyer. F.	propylene glycol	SMNKARA08389
SMNK-ARA 08391	Araneae	Lycosidae	Alopecosa pulverulenta	male	adult	Germany	Baden-Württemberg	Schliffkopf	8.22	48.55	02.05.2012	Höfer. H.	Meyer. F.	propylene glycol	SMNKARA08391
SMNK-ARA 08392	Araneae	Lycosidae	Alopecosa pulverulenta	male	adult	Germany	Baden-Württemberg	Schliffkopf	8.22	48.55	02.05.2012	Höfer. H.	Meyer. F.	propylene glycol	SMNKARA08392
SMNK-ARA 08393	Araneae	Lycosidae	Pardosa pullata	male	adult	Germany	Baden-Württemberg	Schliffkopf	8.22	48.55	02.05.2012	Höfer. H.	Meyer. F.	propylene glycol	SMNKARA08393
SMNK-ARA 08394	Araneae	Lycosidae	Trochosa terricola	male	adult	Germany	Baden-Württemberg	Schliffkopf	8.22	48.55	02.05.2012	Höfer. H.	Meyer. F.	propylene glycol	SMNKARA08394
SMNK-ARA 08395	Araneae	Lycosidae	Trochosa terricola	male	adult	Germany	Baden-Württemberg	Schliffkopf	8.22	48.55	02.05.2012	Höfer. H.	Meyer. F.	propylene glycol	SMNKARA08395
SMNK-ARA 08398	Araneae	Lycosidae	Trochosa terricola	male	adult	Germany	Baden-Württemberg	Schliffkopf	8.22	48.55	02.05.2012	Höfer. H.	Meyer. F.	propylene glycol	SMNKARA08398
SMNK-ARA 08399	Araneae	Lycosidae	Trochosa terricola	female	adult	Germany	Baden-Württemberg	Schliffkopf	8.22	48.55	02.05.2012	Höfer. H.	Meyer. F.	propylene glycol	SMNKARA08399
SMNK-ARA 08402	Araneae	Lycosidae	Trochosa terricola	male	adult	Germany	Baden-Württemberg	Schliffkopf	8.22	48.55	02.05.2012	Höfer. H.	Meyer. F.	propylene glycol	SMNKARA08402
SMNK-ARA 08403	Araneae	Lycosidae	Trochosa terricola	male	adult	Germany	Baden-Württemberg	Schliffkopf	8.22	48.55	02.05.2012	Höfer. H.	Meyer. F.	propylene glycol	SMNKARA08403
SMNK-ARA 08406	Araneae	Lycosidae	Alopecosa pulverulenta	male	adult	Germany	Baden-Württemberg	Schliffkopf	8.22	48.55	10.07.2012	Höfer. H.	Meyer. F.	propylene glycol	SMNKARA08406
SMNK-ARA 08408	Araneae	Clubionidae	Clubiona comta	male	adult	Germany	Baden-Württemberg	Schliffkopf	8.22	48.55	14.05.2012	Höfer. H.	Meyer. F.	propylene glycol	SMNKARA08408
SMNK-ARA 08409	Araneae	Gnaphosidae	Zelotes clivicola	male	adult	Germany	Baden-Württemberg	Schliffkopf	8.22	48.55	10.07.2012	Höfer. H.	Meyer. F.	propylene glycol	SMNKARA08409
SMNK-ARA 08788	Araneae	Linyphiidae	Neriene clathrata	female	adult	Germany	Baden-Württemberg	Sandhausen	8.66	49.33	08.05.2013	Höfer. H.	Meyer. F.	ethanol 70%	SMNKARA08788
SMNK-ARA 08789	Araneae	Tetragnathidae	Metellina mengei	female	adult	Germany	Baden-Württemberg	Sandhausen	8.66	49.33	08.05.2013	Höfer. H.	Meyer. F.	ethanol 70%	SMNKARA08789
SMNK-ARA 08790	Araneae	Tetragnathidae	Metellina mengei	female	adult	Germany	Baden-Württemberg	Sandhausen	8.66	49.33	08.05.2013	Höfer. H.	Meyer. F.	ethanol 70%	SMNKARA08790
SMNK-ARA 08791	Araneae	Linyphiidae	Typhochrestus digitatus	female	adult	Germany	Baden-Württemberg	Sandhausen	8.66	49.33	08.05.2013	Höfer. H.	Meyer. F.	ethanol 70%	SMNKARA08791
SMNK-ARA 08792	Araneae	Linyphiidae	Minyriolus pusillus	female	adult	Germany	Baden-Württemberg	Sandhausen	8.66	49.33	08.05.2013	Höfer. H.	Meyer. F.	ethanol 70%	SMNKARA08792
SMNK-ARA 08794	Araneae	Linyphiidae	Bolyphantes alticeps	female	adult	Germany	Baden-Württemberg	Schliffkopf	8.22	48.55	01.10.2012	Höfer. H.	Meyer. F.	propylene glycol	SMNKARA08794
SMNK-ARA 08795	Araneae	Linyphiidae	Bolyphantes alticeps	female	adult	Germany	Baden-Württemberg	Schliffkopf	8.22	48.55	01.10.2012	Höfer. H.	Meyer. F.	propylene glycol	SMNKARA08795
SMNK-ARA 08796	Araneae	Linyphiidae	Ceratinella brevis	female	adult	Germany	Baden-Württemberg	Schliffkopf	8.22	48.55	01.10.2012	Höfer. H.	Meyer. F.	propylene glycol	SMNKARA08796
SMNK-ARA 08797	Araneae	Linyphiidae	Bolyphantes alticeps	male	adult	Germany	Baden-Württemberg	Schliffkopf	8.22	48.55	29.10.2012	Höfer. H.	Meyer. F.	propylene glycol	SMNKARA08797
SMNK-ARA 08798	Araneae	Linyphiidae	Bolyphantes alticeps	female	adult	Germany	Baden-Württemberg	Schliffkopf	8.22	48.55	29.10.2012	Höfer. H.	Meyer. F.	propylene glycol	SMNKARA08798
SMNK-ARA 08799	Araneae	Linyphiidae	Centromerus dilutus	female	adult	Germany	Baden-Württemberg	Schliffkopf	8.22	48.55	29.10.2012	Höfer. H.	Meyer. F.	propylene glycol	SMNKARA08799
SMNK-ARA 08800	Araneae	Linyphiidae	Centromerita bicolor	male	adult	Germany	Baden-Württemberg	Schliffkopf	8.22	48.55	29.10.2012	Höfer. H.	Meyer. F.	propylene glycol	SMNKARA08800
SMNK-ARA 08801	Araneae	Linyphiidae	Centromerita bicolor	male	adult	Germany	Baden-Württemberg	Schliffkopf	8.22	48.55	29.10.2012	Höfer. H.	Meyer. F.	propylene glycol	SMNKARA08801
SMNK-ARA 08802	Araneae	Linyphiidae	Evansia merens	female	adult	Germany	Baden-Württemberg	Schliffkopf	8.22	48.55	10.07.2012	Höfer. H.	Meyer. F.	propylene glycol	SMNKARA08802
SMNK-ARA 08803	Araneae	Linyphiidae	Gonatium paradoxum	male	adult	Germany	Baden-Württemberg	Schliffkopf	8.22	48.55	04.09.2012	Höfer. H.	Meyer. F.	propylene glycol	SMNKARA08803
SMNK-ARA 08804	Araneae	Linyphiidae	Gonatium paradoxum	male	adult	Germany	Baden-Württemberg	Schliffkopf	8.22	48.55	17.09.2012	Höfer. H.	Meyer. F.	propylene glycol	SMNKARA08804
SMNK-ARA 08805	Araneae	Linyphiidae	Gonatium paradoxum	male	adult	Germany	Baden-Württemberg	Schliffkopf	8.22	48.55	17.09.2012	Höfer. H.	Meyer. F.	propylene glycol	SMNKARA08805
SMNK-ARA 08806	Araneae	Linyphiidae	Lepthyphantes ericaeus	female	adult	Germany	Baden-Württemberg	Schliffkopf	8.22	48.55	25.06.2012	Höfer. H.	Meyer. F.	propylene glycol	SMNKARA08806
SMNK-ARA 08808	Araneae	Linyphiidae	Saaristoa abnormis	male	adult	Germany	Baden-Württemberg	Schliffkopf	8.22	48.55	17.09.2012	Höfer. H.	Meyer. F.	propylene glycol	SMNKARA08808
SMNK-ARA 08809	Araneae	Linyphiidae	Saaristoa abnormis	male	adult	Germany	Baden-Württemberg	Schliffkopf	8.22	48.55	17.09.2012	Höfer. H.	Meyer. F.	propylene glycol	SMNKARA08809
SMNK-ARA 08810	Araneae	Linyphiidae	Saaristoa abnormis	male	adult	Germany	Baden-Württemberg	Schliffkopf	8.22	48.55	01.10.2012	Höfer. H.	Meyer. F.	propylene glycol	SMNKARA08810
SMNK-ARA 08811	Araneae	Linyphiidae	Maso sundevalli	male	adult	Germany	Baden-Württemberg	Schliffkopf	8.22	48.55	23.07.2012	Höfer. H.	Meyer. F.	propylene glycol	SMNKARA08811
SMNK-ARA 08812	Araneae	Linyphiidae	Maso sundevalli	female	adult	Germany	Baden-Württemberg	Schliffkopf	8.22	48.55	10.07.2012	Höfer. H.	Meyer. F.	propylene glycol	SMNKARA08812
SMNK-ARA 08813	Araneae	Linyphiidae	Maso sundevalli	male	adult	Germany	Baden-Württemberg	Schliffkopf	8.22	48.55	10.07.2012	Höfer. H.	Meyer. F.	propylene glycol	SMNKARA08813
SMNK-ARA 08814	Araneae	Linyphiidae	Microlinyphia pusilla	female	juvenile	Germany	Baden-Württemberg	Grenzsägmühle	8.58	48.89	16.04.2013	Höfer. H.	Höfer. H.	ethanol 70%	SMNKARA08814
SMNK-ARA 08815	Araneae	Linyphiidae	Minyriolus pusillus	female	adult	Germany	Baden-Württemberg	Schliffkopf	8.22	48.55	06.08.2012	Höfer. H.	Meyer. F.	propylene glycol	SMNKARA08815
SMNK-ARA 08816	Araneae	Linyphiidae	Palliduphantes pallidus	male	adult	Germany	Baden-Württemberg	Schliffkopf	8.22	48.55	29.10.2012	Höfer. H.	Meyer. F.	propylene glycol	SMNKARA08816
SMNK-ARA 08817	Araneae	Linyphiidae	Palliduphantes pallidus	male	adult	Germany	Baden-Württemberg	Schliffkopf	8.22	48.55	29.10.2012	Höfer. H.	Meyer. F.	propylene glycol	SMNKARA08817
SMNK-ARA 08819	Araneae	Linyphiidae	Saaristoa abnormis	male	adult	Germany	Baden-Württemberg	Schliffkopf	8.22	48.55	06.08.2012	Höfer. H.	Meyer. F.	propylene glycol	SMNKARA08819
SMNK-ARA 08821	Araneae	Linyphiidae	Saaristoa abnormis	male	adult	Germany	Baden-Württemberg	Schliffkopf	8.22	48.55	10.07.2012	Höfer. H.	Meyer. F.	propylene glycol	SMNKARA08821
SMNK-ARA 08822	Araneae	Linyphiidae	Sintula corniger	male	adult	Germany	Baden-Württemberg	Schliffkopf	8.22	48.55	14.05.2012	Höfer. H.	Meyer. F.	propylene glycol	SMNKARA08822
SMNK-ARA 08823	Araneae	Linyphiidae	Tenuiphantes alacris	female	adult	Germany	Baden-Württemberg	Schliffkopf	8.22	48.55	29.10.2012	Höfer. H.	Meyer. F.	propylene glycol	SMNKARA08823
SMNK-ARA 08825	Araneae	Linyphiidae	Tenuiphantes tenebricola	male	adult	Germany	Baden-Württemberg	Schliffkopf	8.22	48.55	01.10.2012	Höfer. H.	Meyer. F.	propylene glycol	SMNKARA08825
SMNK-ARA 08827	Araneae	Linyphiidae	Tenuiphantes alacris	female	adult	Germany	Baden-Württemberg	Schliffkopf	8.22	48.55	29.10.2012	Höfer. H.	Meyer. F.	propylene glycol	SMNKARA08827
SMNK-ARA 08828	Araneae	Linyphiidae	Walckenaeria alticeps	female	adult	Germany	Baden-Württemberg	Schliffkopf	8.22	48.55	25.05.2012	Höfer. H.	Meyer. F.	propylene glycol	SMNKARA08828
SMNK-ARA 08830	Araneae	Linyphiidae	Walckenaeria alticeps	female	adult	Germany	Baden-Württemberg	Schliffkopf	8.22	48.55	20.08.2012	Höfer. H.	Meyer. F.	propylene glycol	SMNKARA08830
SMNK-ARA 08831	Araneae	Linyphiidae	Walckenaeria alticeps	female	adult	Germany	Baden-Württemberg	Schliffkopf	8.22	48.55	20.08.2012	Höfer. H.	Meyer. F.	propylene glycol	SMNKARA08831
SMNK-ARA 08832	Araneae	Linyphiidae	Walckenaeria alticeps	female	adult	Germany	Baden-Württemberg	Schliffkopf	8.22	48.55	20.08.2012	Höfer. H.	Meyer. F.	propylene glycol	SMNKARA08832
SMNK-ARA 08833	Araneae	Linyphiidae	Walckenaeria alticeps	male	adult	Germany	Baden-Württemberg	Schliffkopf	8.22	48.55	14.05.2012	Höfer. H.	Meyer. F.	propylene glycol	SMNKARA08833
SMNK-ARA 08834	Araneae	Linyphiidae	Walckenaeria atrotibialis	female	adult	Germany	Baden-Württemberg	Schliffkopf	8.22	48.55	20.08.2012	Höfer. H.	Meyer. F.	propylene glycol	SMNKARA08834
SMNK-ARA 08836	Araneae	Linyphiidae	Walckenaeria atrotibialis	male	adult	Germany	Baden-Württemberg	Schliffkopf	8.22	48.55	06.08.2012	Höfer. H.	Meyer. F.	propylene glycol	SMNKARA08836
SMNK-ARA 08837	Araneae	Linyphiidae	Walckenaeria atrotibialis	male	adult	Germany	Baden-Württemberg	Schliffkopf	8.22	48.55	23.07.2012	Höfer. H.	Meyer. F.	propylene glycol	SMNKARA08837
SMNK-ARA 08838	Araneae	Agelenidae	Inermocoelotes inermis	female	adult	Germany	Baden-Württemberg	Schliffkopf	8.22	48.55	17.09.2012	Höfer. H.	Meyer. F.	propylene glycol	SMNKARA08838
SMNK-ARA 08839	Araneae	Agelenidae	Inermocoelotes inermis	male	adult	Germany	Baden-Württemberg	Schliffkopf	8.22	48.55	17.09.2012	Höfer. H.	Meyer. F.	propylene glycol	SMNKARA08839
SMNK-ARA 08840	Araneae	Agelenidae	Inermocoelotes inermis	male	adult	Germany	Baden-Württemberg	Schliffkopf	8.22	48.55	17.09.2012	Höfer. H.	Meyer. F.	propylene glycol	SMNKARA08840
SMNK-ARA 08841	Araneae	Agelenidae	Inermocoelotes inermis	male	adult	Germany	Baden-Württemberg	Schliffkopf	8.22	48.55	17.09.2012	Höfer. H.	Meyer. F.	propylene glycol	SMNKARA08841
SMNK-ARA 08842	Araneae	Agelenidae	Inermocoelotes inermis	male	adult	Germany	Baden-Württemberg	Schliffkopf	8.22	48.55	17.09.2012	Höfer. H.	Meyer. F.	propylene glycol	SMNKARA08842
SMNK-ARA 08843	Araneae	Agelenidae	Inermocoelotes inermis	male	adult	Germany	Baden-Württemberg	Schliffkopf	8.22	48.55	17.09.2012	Höfer. H.	Meyer. F.	propylene glycol	SMNKARA08843
SMNK-ARA 08844	Araneae	Agelenidae	Eratigena agrestis	female	adult	Germany	Baden-Württemberg	Sandhausen	8.66	49.33	08.05.2013	Höfer. H.	Meyer. F.	ethanol 70%	SMNKARA08844
SMNK-ARA 08846	Araneae	Araneidae	Cercidia prominens	female	adult	Germany	Baden-Württemberg	Sandhausen	8.66	49.33	08.05.2013	Höfer. H.	Meyer. F.	ethanol 70%	SMNKARA08846
SMNK-ARA 08847	Araneae	Araneidae	Cercidia prominens	female	adult	Germany	Baden-Württemberg	Sandhausen	8.66	49.33	08.05.2013	Höfer. H.	Meyer. F.	ethanol 70%	SMNKARA08847
SMNK-ARA 08848	Araneae	Araneidae	Gibbaranea bituberculata	male	adult	Germany	Baden-Württemberg	Sandhausen	8.66	49.33	08.05.2013	Höfer. H.	Meyer. F.	ethanol 70%	SMNKARA08848
SMNK-ARA 08849	Araneae	Araneidae	Gibbaranea bituberculata	female	adult	Germany	Baden-Württemberg	Sandhausen	8.66	49.33	08.05.2013	Höfer. H.	Meyer. F.	ethanol 70%	SMNKARA08849
SMNK-ARA 08850	Araneae	Araneidae	Mangora acalypha		juvenile	Germany	Baden-Württemberg	Sandhausen	8.66	49.33	08.05.2013	Höfer. H.	Meyer. F.	ethanol 70%	SMNKARA08850
SMNK-ARA 08851	Araneae	Araneidae	Mangora acalypha		juvenile	Germany	Baden-Württemberg	Sandhausen	8.66	49.33	08.05.2013	Höfer. H.	Meyer. F.	ethanol 70%	SMNKARA08851
SMNK-ARA 08852	Araneae	Araneidae	Mangora acalypha		juvenile	Germany	Baden-Württemberg	Sandhausen	8.66	49.33	08.05.2013	Höfer. H.	Meyer. F.	ethanol 70%	SMNKARA08852
SMNK-ARA 08853	Araneae	Araneidae	Mangora acalypha		juvenile	Germany	Baden-Württemberg	Sandhausen	8.66	49.33	08.05.2013	Höfer. H.	Meyer. F.	ethanol 70%	SMNKARA08853
SMNK-ARA 08854	Araneae	Gnaphosidae	Drassodes cupreus	male	adult	Germany	Baden-Württemberg	Schliffkopf	8.22	48.55	25.05.2012	Höfer. H.	Meyer. F.	propylene glycol	SMNKARA08854
SMNK-ARA 08855	Araneae	Gnaphosidae	Haplodrassus signifer	male	adult	Germany	Baden-Württemberg	Schliffkopf	8.22	48.55	25.06.2012	Höfer. H.	Meyer. F.	propylene glycol	SMNKARA08855
SMNK-ARA 08856	Araneae	Gnaphosidae	Haplodrassus signifer	female	adult	Germany	Baden-Württemberg	Schliffkopf	8.22	48.55	25.06.2012	Höfer. H.	Meyer. F.	propylene glycol	SMNKARA08856
SMNK-ARA 08857	Araneae	Gnaphosidae	Zelotes petrensis	female	adult	Germany	Baden-Württemberg	Sandhausen	8.66	49.33	08.05.2013	Höfer. H.	Meyer. F.	ethanol 70%	SMNKARA08857
SMNK-ARA 08858	Araneae	Gnaphosidae	Zelotes latreillei	male	adult	Germany	Baden-Württemberg	Schliffkopf	8.22	48.55	10.07.2012	Höfer. H.	Meyer. F.	propylene glycol	SMNKARA08858
SMNK-ARA 08859	Araneae	Gnaphosidae	Zelotes clivicola	male	adult	Germany	Baden-Württemberg	Schliffkopf	8.22	48.55	10.06.2012	Höfer. H.	Meyer. F.	propylene glycol	SMNKARA08859
SMNK-ARA 08860	Araneae	Dictynidae	Dictyna uncinata	male	adult	Germany	Baden-Württemberg	Sandhausen	8.66	49.33	08.05.2013	Höfer. H.	Meyer. F.	ethanol 70%	SMNKARA08860
SMNK-ARA 08861	Araneae	Dictynidae	Dictyna uncinata		juvenile	Germany	Baden-Württemberg	Sandhausen	8.66	49.33	08.05.2013	Höfer. H.	Meyer. F.	ethanol 70%	SMNKARA08861
SMNK-ARA 08864	Araneae	Hahniidae	Hahnia nava	female	adult	Germany	Bayern	Glasfelderkopf	10.43	47.4	17.11.2012	Karle-Fendt. A.	Meyer. F.	ethanol 70%	SMNKARA08864
SMNK-ARA 08865	Araneae	Hahniidae	Hahnia nava	female	adult	Germany	Bayern	Glasfelderkopf	10.43	47.4	17.11.2012	Karle-Fendt. A.	Meyer. F.	ethanol 70%	SMNKARA08865
SMNK-ARA 08867	Araneae	Salticidae	Evarcha falcata	female	adult	Germany	Baden-Württemberg	Sandhausen	8.66	49.33	08.05.2013	Höfer. H.	Meyer. F.	ethanol 70%	SMNKARA08867
SMNK-ARA 08868	Araneae	Salticidae	Evarcha arcuata	male	adult	Germany	Baden-Württemberg	Sandhausen	8.66	49.33	08.05.2013	Höfer. H.	Meyer. F.	ethanol 70%	SMNKARA08868
SMNK-ARA 08869	Araneae	Salticidae	Heliophanus cupreus	male	adult	Germany	Baden-Württemberg	Sandhausen	8.66	49.33	08.05.2013	Höfer. H.	Meyer. F.	ethanol 70%	SMNKARA08869
SMNK-ARA 08870	Araneae	Salticidae	Heliophanus cupreus	male	adult	Germany	Baden-Württemberg	Sandhausen	8.66	49.33	08.05.2013	Höfer. H.	Meyer. F.	ethanol 70%	SMNKARA08870
SMNK-ARA 08871	Araneae	Salticidae	Heliophanus cupreus	male	adult	Germany	Baden-Württemberg	Sandhausen	8.66	49.33	08.05.2013	Höfer. H.	Meyer. F.	ethanol 70%	SMNKARA08871
SMNK-ARA 08872	Araneae	Salticidae	Neon reticulatus	female	adult	Germany	Baden-Württemberg	Schliffkopf	8.22	48.55	10.07.2012	Höfer. H.	Meyer. F.	propylene glycol	SMNKARA08872
SMNK-ARA 08873	Araneae	Salticidae	Neon reticulatus	male	adult	Germany	Baden-Württemberg	Schliffkopf	8.22	48.55	25.05.2012	Höfer. H.	Meyer. F.	propylene glycol	SMNKARA08873
SMNK-ARA 08874	Araneae	Salticidae	Aelurillus v-insignitus	male	adult	Germany	Baden-Württemberg	Sandhausen	8.66	49.33	08.05.2013	Höfer. H.	Meyer. F.	ethanol 70%	SMNKARA08874
SMNK-ARA 08875	Araneae	Salticidae	Aelurillus v-insignitus	male	adult	Germany	Baden-Württemberg	Sandhausen	8.66	49.33	08.05.2013	Höfer. H.	Meyer. F.	ethanol 70%	SMNKARA08875
SMNK-ARA 08876	Araneae	Salticidae	Aelurillus v-insignitus	male	adult	Germany	Baden-Württemberg	Sandhausen	8.66	49.33	08.05.2013	Höfer. H.	Meyer. F.	ethanol 70%	SMNKARA08876
SMNK-ARA 08877	Araneae	Salticidae	Aelurillus v-insignitus	female	adult	Germany	Baden-Württemberg	Sandhausen	8.66	49.33	08.05.2013	Höfer. H.	Meyer. F.	ethanol 70%	SMNKARA08877
SMNK-ARA 08878	Araneae	Salticidae	Aelurillus v-insignitus		juvenile	Germany	Baden-Württemberg	Sandhausen	8.66	49.33	08.05.2013	Höfer. H.	Meyer. F.	ethanol 70%	SMNKARA08878
SMNK-ARA 08879	Araneae	Salticidae	Pellenes nigrociliatus	male	adult	Germany	Baden-Württemberg	Sandhausen	8.66	49.33	08.05.2013	Höfer. H.	Meyer. F.	ethanol 70%	SMNKARA08879
SMNK-ARA 08880	Araneae	Salticidae	Heliophanus flavipes	male	adult	Germany	Baden-Württemberg	Sandhausen	8.66	49.33	08.05.2013	Höfer. H.	Meyer. F.	ethanol 70%	SMNKARA08880
SMNK-ARA 08881	Araneae	Salticidae	Marpissa muscosa	female	adult	Germany	Baden-Württemberg	Sandhausen	8.66	49.33	08.05.2013	Höfer. H.	Meyer. F.	ethanol 70%	SMNKARA08881
SMNK-ARA 08882	Araneae	Salticidae	Euophrys frontalis	male	adult	Germany	Baden-Württemberg	Sandhausen	8.66	49.33	08.05.2013	Höfer. H.	Meyer. F.	ethanol 70%	SMNKARA08882
SMNK-ARA 08883	Araneae	Salticidae	Euophrys frontalis	male	adult	Germany	Baden-Württemberg	Sandhausen	8.66	49.33	08.05.2013	Höfer. H.	Meyer. F.	ethanol 70%	SMNKARA08883
SMNK-ARA 08884	Araneae	Salticidae	Euophrys frontalis	male	adult	Germany	Baden-Württemberg	Schliffkopf	8.22	48.55	25.05.2012	Höfer. H.	Meyer. F.	propylene glycol	SMNKARA08884
SMNK-ARA 08885	Araneae	Salticidae	Sibianor larae	male	adult	Germany	Baden-Württemberg	Schliffkopf	8.22	48.55	10.07.2012	Höfer. H.	Meyer. F.	propylene glycol	SMNKARA08885
SMNK-ARA 08886	Araneae	Salticidae	Talavera aequipes	male	adult	Germany	Baden-Württemberg	Schliffkopf	8.22	48.55	06.08.2012	Höfer. H.	Meyer. F.	propylene glycol	SMNKARA08886
SMNK-ARA 08887	Araneae	Agelenidae	Tegenaria ferruginea	male	adult	Germany	Baden-Württemberg	Erzingen	8.42	47.66	14.04.2013	Zarte. N.	Höfer. H.	ethanol 70%	SMNKARA08887
SMNK-ARA 08888	Araneae	Amaurobiidae	Amaurobius ferox	female	adult	Germany	Baden-Württemberg	Erzingen	8.42	47.66	14.04.2013	Zarte. N.	Höfer. H.	ethanol 70%	SMNKARA08888
SMNK-ARA 08889	Araneae	Atypidae	Atypus piceus	female	adult	Germany	Baden-Württemberg	Urspring	9.89	48.54	09.05.2013	Höfer. H.	Höfer. H.	ethanol 70%	SMNKARA08889
SMNK-ARA 08890	Araneae	Eresidae	Eresus kollari	female	adult	Germany	Baden-Württemberg	Sandhausen	8.66	49.33	08.05.2013	Höfer. H.	Höfer. H.	ethanol 70%	SMNKARA08890
SMNK-ARA 08891	Araneae	Dysderidae	Harpactea rubicunda	male	adult	Germany	Baden-Württemberg	Erzingen	8.42	47.66	11.05.2013	Zarte. N.	Höfer. H.	ethanol 70%	SMNKARA08891
SMNK-ARA 08892	Araneae	Dysderidae	Harpactea rubicunda	female	adult	Germany	Baden-Württemberg	Erzingen	8.42	47.66	11.05.2013	Zarte. N.	Höfer. H.	ethanol 70%	SMNKARA08892
SMNK-ARA 08893	Araneae	Lycosidae	Alopecosa cuneata	female	juvenile	Germany	Baden-Württemberg	Keltern	8.58	48.89	16.04.2013	Höfer. H.	Höfer. H.	ethanol 70%	SMNKARA08893
SMNK-ARA 08894	Araneae	Lycosidae	Alopecosa cuneata	female	juvenile	Germany	Baden-Württemberg	Keltern	8.58	48.89	16.04.2013	Höfer. H.	Höfer. H.	ethanol 70%	SMNKARA08894
SMNK-ARA 08895	Araneae	Lycosidae	Alopecosa sulzeri	male	adult	Germany	Baden-Württemberg	Sandhausen	8.66	49.33	08.05.2013	Meyer. F.	Höfer. H.	ethanol 70%	SMNKARA08895
SMNK-ARA 08896	Araneae	Lycosidae	Pardosa hortensis	female	adult	Germany	Baden-Württemberg	Sandhausen	8.66	49.33	08.05.2013	Meyer. F.	Höfer. H.	ethanol 70%	SMNKARA08896
SMNK-ARA 08897	Araneae	Lycosidae	Xerolycosa nemoralis	female	adult	Germany	Baden-Württemberg	Sandhausen	8.66	49.33	08.05.2013	Meyer. F.	Höfer. H.	ethanol 70%	SMNKARA08897
SMNK-ARA 08898	Araneae	Theridiidae	Asagena phalerata	male	adult	Germany	Baden-Württemberg	Sandhausen	8.66	49.33	08.05.2013	Meyer. F.	Höfer. H.	ethanol 70%	SMNKARA08898
SMNK-ARA 08899	Araneae	Theridiidae	Episinus angulatus	female	adult	Germany	Baden-Württemberg	Schliffkopf	8.22	48.55	04.09.2012	Höfer. H.	Meyer. F.	propylene glycol	SMNKARA08899
SMNK-ARA 08900	Araneae	Theridiidae	Robertus lividus	male	adult	Germany	Baden-Württemberg	Schliffkopf	8.22	48.55	29.10.2012	Höfer. H.	Meyer. F.	propylene glycol	SMNKARA08900
SMNK-ARA 08901	Araneae	Theridiidae	Robertus scoticus	male	adult	Germany	Baden-Württemberg	Schliffkopf	8.22	48.55	25.05.2012	Höfer. H.	Meyer. F.	propylene glycol	SMNKARA08901
SMNK-ARA 08903	Araneae	Thomisidae	Ozyptila scabricula	male	adult	Germany	Baden-Württemberg	Sandhausen	8.66	49.33	08.05.2013	Meyer. F.	Höfer. H.	ethanol 70%	SMNKARA08903
SMNK-ARA 08904	Araneae	Thomisidae	Tmarus piger	male	adult	Germany	Baden-Württemberg	Sandhausen	8.66	49.33	08.05.2013	Meyer. F.	Höfer. H.	ethanol 70%	SMNKARA08904
SMNK-ARA 08905	Araneae	Thomisidae	Xysticus acerbus	male	juvenile	Germany	Baden-Württemberg	Keltern	8.58	48.89	16.04.2013	Zarte. N.	Schneider. A.	ethanol 70%	SMNKARA08905
SMNK-ARA 08906	Araneae	Thomisidae	Xysticus acerbus	male	juvenile	Germany	Baden-Württemberg	Keltern	8.58	48.89	16.04.2013	Zarte. N.	Schneider. A.	ethanol 70%	SMNKARA08906
SMNK-ARA 08908	Araneae	Thomisidae	Xysticus cristatus	female	juvenile	Germany	Baden-Württemberg	Sandhausen	8.66	49.33	08.05.2013	Meyer. F.	Höfer. H.	ethanol 70%	SMNKARA08908
SMNK-ARA 08909	Araneae	Thomisidae	Xysticus bifasciatus	female	adult	Germany	Baden-Württemberg	Keltern	8.58	48.89	16.04.2013	Höfer. H.	Höfer. H.	ethanol 70%	SMNKARA08909
SMNK-ARA 08910	Araneae	Thomisidae	Xysticus bifasciatus	female	adult	Germany	Baden-Württemberg	Keltern	8.58	48.89	16.04.2013	Zarte. N.	Höfer. H.	ethanol 70%	SMNKARA08910
SMNK-ARA 08911	Araneae	Thomisidae	Xysticus cristatus	male	adult	Germany	Baden-Württemberg	Keltern	8.58	48.89	16.04.2013	Zarte. N.	Zarte. N.	ethanol 70%	SMNKARA08911
SMNK-ARA 08912	Araneae	Thomisidae	Xysticus kochi	female	adult	Germany	Baden-Württemberg	Sandhausen	8.66	49.33	08.05.2013	Meyer. F.	Höfer. H.	ethanol 70%	SMNKARA08912
SMNK-ARA 08913	Araneae	Thomisidae	Xysticus kochi	female	adult	Germany	Baden-Württemberg	Sandhausen	8.66	49.33	08.05.2013	Meyer. F.	Höfer. H.	ethanol 70%	SMNKARA08913
SMNK-ARA 08914	Araneae	Thomisidae	Xysticus kochi	female	juvenile	Germany	Baden-Württemberg	Sandhausen	8.66	49.33	08.05.2013	Meyer. F.	Höfer. H.	ethanol 70%	SMNKARA08914
SMNK-ARA 08915	Araneae	Thomisidae	Xysticus kochi	female	adult	Germany	Baden-Württemberg	Sandhausen	8.66	49.33	08.05.2013	Meyer. F.	Höfer. H.	ethanol 70%	SMNKARA08915
SMNK-ARA 08916	Araneae	Thomisidae	Xysticus kochi	female	adult	Germany	Baden-Württemberg	Sandhausen	8.66	49.33	08.05.2013	Meyer. F.	Höfer. H.	ethanol 70%	SMNKARA08916
SMNK-ARA 08917	Araneae	Thomisidae	Xysticus acerbus	female	adult	Germany	Baden-Württemberg	Keltern	8.58	48.89	05.05.2013	Höfer. H.	Höfer. H.	ethanol 70%	SMNKARA08917
SMNK-ARA 08918	Araneae	Miturgidae	Zora spinimana	female	adult	Germany	Baden-Württemberg	Sandhausen	8.66	49.33	08.05.2013	Meyer. F.	Höfer. H.	ethanol 70%	SMNKARA08918
SMNK-ARA 08919	Araneae	Tetragnathidae	Metellina merianae	female	adult	Germany	Baden-Württemberg	Grabenstetten	9.45	48.52	09.05.2013	Höfer. H.	Höfer. H.	ethanol 70%	SMNKARA08919
SMNK-ARA 08920	Araneae	Tetragnathidae	Metellina merianae	female	adult	Germany	Baden-Württemberg	Grabenstetten	9.45	48.52	09.05.2013	Höfer. H.	Höfer. H.	ethanol 70%	SMNKARA08920
SMNK-ARA 08921	Araneae	Tetragnathidae	Metellina merianae	male	adult	Germany	Baden-Württemberg	Grabenstetten	9.45	48.52	09.05.2013	Höfer. H.	Höfer. H.	ethanol 70%	SMNKARA08921
SMNK-ARA 08922	Araneae	Araneidae	Larinioides cornutus	female	adult	Germany	Baden-Württemberg	Radelstetten	9.86	48.53	09.05.2013	Höfer. H.	Höfer. H.	ethanol 70%	SMNKARA08922
SMNK-ARA 08923	Araneae	Araneidae	Larinioides cornutus		juvenile	Germany	Baden-Württemberg	Radelstetten	9.86	48.53	09.05.2013	Höfer. H.	Höfer. H.	ethanol 70%	SMNKARA08923
SMNK-ARA 08924	Araneae	Araneidae	Larinioides cornutus		juvenile	Germany	Baden-Württemberg	Radelstetten	9.86	48.53	09.05.2013	Höfer. H.	Höfer. H.	ethanol 70%	SMNKARA08924
SMNK-ARA 08925	Araneae	Araneidae	Larinioides cornutus		juvenile	Germany	Baden-Württemberg	Radelstetten	9.86	48.53	09.05.2013	Höfer. H.	Höfer. H.	ethanol 70%	SMNKARA08925
SMNK-ARA 08926	Araneae	Araneidae	Larinioides cornutus		juvenile	Germany	Baden-Württemberg	Radelstetten	9.86	48.53	09.05.2013	Höfer. H.	Höfer. H.	ethanol 70%	SMNKARA08926
SMNK-ARA 08927	Araneae	Araneidae	Larinioides cornutus		juvenile	Germany	Baden-Württemberg	Radelstetten	9.86	48.53	09.05.2013	Höfer. H.	Höfer. H.	ethanol 70%	SMNKARA08927
SMNK-ARA 08928	Araneae	Agelenidae	Coelotes terrestris	male	adult	Germany	Baden-Württemberg	Schliffkopf	8.22	48.55	06.08.2012	Höfer. H.	Meyer. F.	propylene glycol	SMNKARA08928
SMNK-ARA 08929	Araneae	Agelenidae	Coelotes terrestris	male	adult	Germany	Baden-Württemberg	Schliffkopf	8.22	48.55	06.08.2012	Höfer. H.	Meyer. F.	propylene glycol	SMNKARA08929
SMNK-ARA 08930	Araneae	Agelenidae	Coelotes terrestris	male	adult	Germany	Baden-Württemberg	Schliffkopf	8.22	48.55	06.08.2012	Höfer. H.	Meyer. F.	propylene glycol	SMNKARA08930
SMNK-ARA 08931	Araneae	Amaurobiidae	Callobius claustrarius	female	adult	Germany	Baden-Württemberg	Schliffkopf	8.22	48.55	20.08.2012	Höfer. H.	Meyer. F.	propylene glycol	SMNKARA08931
SMNK-ARA 08932	Araneae	Gnaphosidae	Micaria pulicaria	male	adult	Germany	Baden-Württemberg	Schliffkopf	8.22	48.55	23.07.2012	Höfer. H.	Meyer. F.	propylene glycol	SMNKARA08932
SMNK-ARA 08933	Araneae	Linyphiidae	Gongylidiellum latebricola	male	adult	Germany	Baden-Württemberg	Schliffkopf	8.22	48.55	23.07.2012	Höfer. H.	Meyer. F.	propylene glycol	SMNKARA08933
SMNK-ARA 08934	Araneae	Linyphiidae	Palliduphantes pallidus	male	adult	Germany	Baden-Württemberg	Schliffkopf	8.22	48.55	23.07.2012	Höfer. H.	Meyer. F.	propylene glycol	SMNKARA08934
SMNK-ARA 08935	Araneae	Linyphiidae	Agyneta rurestris	female	adult	Germany	Baden-Württemberg	Schliffkopf	8.22	48.55	23.07.2012	Höfer. H.	Meyer. F.	propylene glycol	SMNKARA08935
SMNK-ARA 08936	Araneae	Linyphiidae	Agyneta rurestris	male	adult	Germany	Baden-Württemberg	Schliffkopf	8.22	48.55	23.07.2012	Höfer. H.	Meyer. F.	propylene glycol	SMNKARA08936
SMNK-ARA 08937	Araneae	Linyphiidae	Agyneta rurestris	male	adult	Germany	Baden-Württemberg	Schliffkopf	8.22	48.55	23.07.2012	Höfer. H.	Meyer. F.	propylene glycol	SMNKARA08937
SMNK-ARA 08938	Araneae	Linyphiidae	Pocadicnemis pumila	female	adult	Germany	Baden-Württemberg	Schliffkopf	8.22	48.55	23.07.2012	Höfer. H.	Meyer. F.	propylene glycol	SMNKARA08938
SMNK-ARA 08939	Araneae	Linyphiidae	Walckenaeria alticeps	female	adult	Germany	Baden-Württemberg	Schliffkopf	8.22	48.55	23.07.2012	Höfer. H.	Meyer. F.	propylene glycol	SMNKARA08939
SMNK-ARA 08940	Araneae	Linyphiidae	Palliduphantes pallidus	male	adult	Germany	Baden-Württemberg	Schliffkopf	8.22	48.55	10.07.2012	Höfer. H.	Meyer. F.	propylene glycol	SMNKARA08940
SMNK-ARA 08941	Araneae	Linyphiidae	Tenuiphantes cristatus	female	adult	Germany	Baden-Württemberg	Schliffkopf	8.22	48.55	10.07.2012	Höfer. H.	Meyer. F.	propylene glycol	SMNKARA08941
SMNK-ARA 08942	Araneae	Linyphiidae	Tenuiphantes cristatus	female	adult	Germany	Baden-Württemberg	Schliffkopf	8.22	48.55	10.07.2012	Höfer. H.	Meyer. F.	propylene glycol	SMNKARA08942
SMNK-ARA 08944	Araneae	Linyphiidae	Tenuiphantes mengei	female	adult	Germany	Baden-Württemberg	Schliffkopf	8.22	48.55	10.07.2012	Höfer. H.	Meyer. F.	propylene glycol	SMNKARA08944
SMNK-ARA 08945	Araneae	Linyphiidae	Cnephalocotes obscurus	male	adult	Germany	Baden-Württemberg	Schliffkopf	8.22	48.55	10.06.2012	Höfer. H.	Meyer. F.	propylene glycol	SMNKARA08945
SMNK-ARA 08946	Araneae	Linyphiidae	Ceratinella brevis	male	adult	Germany	Baden-Württemberg	Schliffkopf	8.22	48.55	14.05.2012	Höfer. H.	Meyer. F.	propylene glycol	SMNKARA08946
SMNK-ARA 08947	Araneae	Linyphiidae	Diplocephalus latifrons	female	adult	Germany	Baden-Württemberg	Schliffkopf	8.22	48.55	25.06.2012	Höfer. H.	Meyer. F.	propylene glycol	SMNKARA08947
SMNK-ARA 08949	Araneae	Linyphiidae	Agyneta rurestris	male	adult	Germany	Baden-Württemberg	Schliffkopf	8.22	48.55	10.06.2012	Höfer. H.	Meyer. F.	propylene glycol	SMNKARA08949
SMNK-ARA 08950	Araneae	Linyphiidae	Agyneta rurestris	female	adult	Germany	Baden-Württemberg	Schliffkopf	8.22	48.55	23.07.2012	Höfer. H.	Meyer. F.	propylene glycol	SMNKARA08950
SMNK-ARA 08951	Araneae	Linyphiidae	Agyneta rurestris	female	adult	Germany	Baden-Württemberg	Schliffkopf	8.22	48.55	10.07.2012	Höfer. H.	Meyer. F.	propylene glycol	SMNKARA08951
SMNK-ARA 08952	Araneae	Linyphiidae	Agyneta rurestris	female	adult	Germany	Baden-Württemberg	Schliffkopf	8.22	48.55	25.06.2012	Höfer. H.	Meyer. F.	propylene glycol	SMNKARA08952
SMNK-ARA 08953	Araneae	Linyphiidae	Micrargus herbigradus	male	adult	Germany	Baden-Württemberg	Schliffkopf	8.22	48.55	10.06.2012	Höfer. H.	Meyer. F.	propylene glycol	SMNKARA08953
SMNK-ARA 08955	Araneae	Linyphiidae	Micrargus herbigradus	female	adult	Germany	Baden-Württemberg	Schliffkopf	8.22	48.55	10.06.2012	Höfer. H.	Meyer. F.	propylene glycol	SMNKARA08955
SMNK-ARA 08957	Araneae	Linyphiidae	Micrargus herbigradus	female	adult	Germany	Baden-Württemberg	Schliffkopf	8.22	48.55	23.07.2012	Höfer. H.	Meyer. F.	propylene glycol	SMNKARA08957
SMNK-ARA 08958	Araneae	Linyphiidae	Micrargus herbigradus	male	adult	Germany	Baden-Württemberg	Schliffkopf	8.22	48.55	14.05.2012	Höfer. H.	Meyer. F.	propylene glycol	SMNKARA08958
SMNK-ARA 08962	Araneae	Linyphiidae	Walckenaeria dysderoides	male	adult	Germany	Baden-Württemberg	Schliffkopf	8.22	48.55	10.06.2012	Höfer. H.	Meyer. F.	propylene glycol	SMNKARA08962
SMNK-ARA 08963	Araneae	Linyphiidae	Walckenaeria dysderoides	male	adult	Germany	Baden-Württemberg	Schliffkopf	8.22	48.55	10.06.2012	Höfer. H.	Meyer. F.	propylene glycol	SMNKARA08963
SMNK-ARA 08964	Araneae	Linyphiidae	Walckenaeria dysderoides	male	adult	Germany	Baden-Württemberg	Schliffkopf	8.22	48.55	10.07.2012	Höfer. H.	Meyer. F.	propylene glycol	SMNKARA08964
SMNK-ARA 08965	Araneae	Salticidae	Euophrys frontalis	male	adult	Germany	Baden-Württemberg	Schliffkopf	8.22	48.55	06.08.2012	Höfer. H.	Meyer. F.	propylene glycol	SMNKARA08965
SMNK-ARA 08966	Araneae	Salticidae	Euophrys frontalis	male	adult	Germany	Baden-Württemberg	Schliffkopf	8.22	48.55	10.06.2012	Höfer. H.	Meyer. F.	propylene glycol	SMNKARA08966
SMNK-ARA 08967	Araneae	Salticidae	Euophrys frontalis	male	adult	Germany	Baden-Württemberg	Schliffkopf	8.22	48.55	23.07.2012	Höfer. H.	Meyer. F.	propylene glycol	SMNKARA08967
SMNK-ARA 08971	Araneae	Gnaphosidae	Drassodes cupreus	male	adult	Germany	Baden-Württemberg	Schliffkopf	8.22	48.55	14.05.2012	Höfer. H.	Meyer. F.	propylene glycol	SMNKARA08971
SMNK-ARA 08972	Araneae	Gnaphosidae	Haplodrassus signifer	male	adult	Germany	Baden-Württemberg	Schliffkopf	8.22	48.55	10.06.2012	Höfer. H.	Meyer. F.	propylene glycol	SMNKARA08972
SMNK-ARA 08973	Araneae	Gnaphosidae	Haplodrassus signifer	female	adult	Germany	Baden-Württemberg	Schliffkopf	8.22	48.55	10.07.2012	Höfer. H.	Meyer. F.	propylene glycol	SMNKARA08973
SMNK-ARA 08974	Araneae	Theridiidae	Robertus lividus	male	adult	Germany	Baden-Württemberg	Schliffkopf	8.22	48.55	10.06.2012	Höfer. H.	Meyer. F.	propylene glycol	SMNKARA08974
SMNK-ARA 08975	Araneae	Lycosidae	Alopecosa pulverulenta	male	adult	Germany	Baden-Württemberg	Schliffkopf	8.22	48.55	14.05.2012	Höfer. H.	Meyer. F.	propylene glycol	SMNKARA08975
SMNK-ARA 08976	Araneae	Lycosidae	Alopecosa pulverulenta	male	adult	Germany	Baden-Württemberg	Schliffkopf	8.22	48.55	14.05.2012	Höfer. H.	Meyer. F.	propylene glycol	SMNKARA08976
SMNK-ARA 08977	Araneae	Lycosidae	Alopecosa pulverulenta	male	adult	Germany	Baden-Württemberg	Schliffkopf	8.22	48.55	10.06.2012	Höfer. H.	Meyer. F.	propylene glycol	SMNKARA08977
SMNK-ARA 08978	Araneae	Lycosidae	Alopecosa pulverulenta	male	adult	Germany	Baden-Württemberg	Schliffkopf	8.22	48.55	14.05.2012	Höfer. H.	Meyer. F.	propylene glycol	SMNKARA08978
SMNK-ARA 08979	Araneae	Lycosidae	Alopecosa pulverulenta	male	adult	Germany	Baden-Württemberg	Schliffkopf	8.22	48.55	14.05.2012	Höfer. H.	Meyer. F.	propylene glycol	SMNKARA08979
SMNK-ARA 08980	Araneae	Lycosidae	Aulonia albimana	male	adult	Germany	Baden-Württemberg	Schliffkopf	8.22	48.55	25.06.2012	Höfer. H.	Meyer. F.	propylene glycol	SMNKARA08980
SMNK-ARA 08981	Araneae	Lycosidae	Pardosa hortensis	male	adult	Germany	Baden-Württemberg	Schliffkopf	8.22	48.55	14.05.2012	Höfer. H.	Meyer. F.	propylene glycol	SMNKARA08981
SMNK-ARA 08982	Araneae	Lycosidae	Xerolycosa nemoralis	female	adult	Germany	Baden-Württemberg	Schliffkopf	8.22	48.55	23.07.2012	Höfer. H.	Meyer. F.	propylene glycol	SMNKARA08982
SMNK-ARA 08983	Araneae	Lycosidae	Xerolycosa nemoralis	male	adult	Germany	Baden-Württemberg	Schliffkopf	8.22	48.55	10.07.2012	Höfer. H.	Meyer. F.	propylene glycol	SMNKARA08983
SMNK-ARA 08984	Araneae	Lycosidae	Xerolycosa nemoralis	female	adult	Germany	Baden-Württemberg	Schliffkopf	8.22	48.55	23.07.2012	Höfer. H.	Meyer. F.	propylene glycol	SMNKARA08984
SMNK-ARA 08985	Araneae	Lycosidae	Xerolycosa nemoralis	male	adult	Germany	Baden-Württemberg	Schliffkopf	8.22	48.55	10.07.2012	Höfer. H.	Meyer. F.	propylene glycol	SMNKARA08985
SMNK-ARA 08993	Araneae	Lycosidae	Piratula uliginosa	male	adult	Germany	Baden-Württemberg	Karlsruhe	8.48	48.97	24.05.2012	Höfer. H.	Meyer. F.	propylene glycol	SMNKARA08993
SMNK-ARA 08995	Araneae	Gnaphosidae	Drassyllus pusillus	male	adult	Germany	Baden-Württemberg	Karlsruhe	8.48	48.97	24.05.2012	Höfer. H.	Meyer. F.	propylene glycol	SMNKARA08995
SMNK-ARA 08997	Araneae	Gnaphosidae	Drassyllus pusillus	male	adult	Germany	Baden-Württemberg	Karlsruhe	8.48	48.97	24.05.2012	Höfer. H.	Meyer. F.	propylene glycol	SMNKARA08997
SMNK-ARA 08998	Araneae	Gnaphosidae	Drassyllus pusillus	male	adult	Germany	Baden-Württemberg	Karlsruhe	8.48	48.97	24.05.2012	Höfer. H.	Meyer. F.	propylene glycol	SMNKARA08998
SMNK-ARA 08999	Araneae	Thomisidae	Ozyptila praticola	male	adult	Germany	Baden-Württemberg	Karlsruhe	8.48	48.97	08.06.2012	Höfer. H.	Meyer. F.	propylene glycol	SMNKARA08999
SMNK-ARA 09000	Araneae	Theridiidae	Robertus lividus	female	adult	Germany	Baden-Württemberg	Karlsruhe	8.48	48.97	08.06.2012	Höfer. H.	Meyer. F.	propylene glycol	SMNKARA09000
SMNK-ARA 09001	Araneae	Linyphiidae	Microneta viaria	female	adult	Germany	Baden-Württemberg	Karlsruhe	8.48	48.97	08.06.2012	Höfer. H.	Meyer. F.	propylene glycol	SMNKARA09001
SMNK-ARA 09002	Araneae	Linyphiidae	Tenuiphantes flavipes	male	adult	Germany	Baden-Württemberg	Karlsruhe	8.48	48.97	08.06.2012	Höfer. H.	Meyer. F.	propylene glycol	SMNKARA09002
SMNK-ARA 09003	Araneae	Linyphiidae	Tenuiphantes flavipes	female	adult	Germany	Baden-Württemberg	Karlsruhe	8.48	48.97	08.06.2012	Höfer. H.	Meyer. F.	propylene glycol	SMNKARA09003
SMNK-ARA 09005	Araneae	Linyphiidae	Maso sundevalli	male	adult	Germany	Baden-Württemberg	Karlsruhe	8.48	48.97	08.06.2012	Höfer. H.	Meyer. F.	propylene glycol	SMNKARA09005
SMNK-ARA 09006	Araneae	Linyphiidae	Stemonyphantes lineatus	female	adult	Germany	Baden-Württemberg	Karlsruhe	8.48	48.97	01.05.2012	Höfer. H.	Meyer. F.	propylene glycol	SMNKARA09006
SMNK-ARA 09007	Araneae	Lycosidae	Pardosa prativaga	male	adult	Germany	Baden-Württemberg	Karlsruhe	8.48	48.97	09.05.2012	Höfer. H.	Meyer. F.	propylene glycol	SMNKARA09007
SMNK-ARA 09008	Araneae	Lycosidae	Piratula uliginosa	male	adult	Germany	Baden-Württemberg	Karlsruhe	8.48	48.97	09.05.2012	Höfer. H.	Meyer. F.	propylene glycol	SMNKARA09008
SMNK-ARA 09009	Araneae	Linyphiidae	Agyneta affinis	male	adult	Germany	Baden-Württemberg	Karlsruhe	8.48	48.97	09.05.2012	Höfer. H.	Meyer. F.	propylene glycol	SMNKARA09009
SMNK-ARA 09010	Araneae	Linyphiidae	Agyneta affinis	male	adult	Germany	Baden-Württemberg	Karlsruhe	8.48	48.97	09.05.2012	Höfer. H.	Meyer. F.	propylene glycol	SMNKARA09010
SMNK-ARA 09011	Araneae	Linyphiidae	Agyneta affinis	male	adult	Germany	Baden-Württemberg	Karlsruhe	8.48	48.97	09.05.2012	Höfer. H.	Meyer. F.	propylene glycol	SMNKARA09011
SMNK-ARA 09012	Araneae	Lycosidae	Piratula uliginosa	female	adult	Germany	Baden-Württemberg	Karlsruhe	8.48	48.97	31.05.2012	Höfer. H.	Meyer. F.	propylene glycol	SMNKARA09012
SMNK-ARA 09013	Araneae	Lycosidae	Piratula uliginosa	female	adult	Germany	Baden-Württemberg	Karlsruhe	8.48	48.97	31.05.2012	Höfer. H.	Meyer. F.	propylene glycol	SMNKARA09013
SMNK-ARA 09014	Araneae	Lycosidae	Piratula uliginosa	male	adult	Germany	Baden-Württemberg	Karlsruhe	8.48	48.97	31.05.2012	Höfer. H.	Meyer. F.	propylene glycol	SMNKARA09014
SMNK-ARA 09015	Araneae	Lycosidae	Piratula uliginosa	male	adult	Germany	Baden-Württemberg	Karlsruhe	8.48	48.97	31.05.2012	Höfer. H.	Meyer. F.	propylene glycol	SMNKARA09015
SMNK-ARA 09016	Araneae	Lycosidae	Piratula uliginosa	male	adult	Germany	Baden-Württemberg	Karlsruhe	8.48	48.97	31.05.2012	Höfer. H.	Meyer. F.	propylene glycol	SMNKARA09016
SMNK-ARA 09017	Araneae	Miturgidae	Zora spinimana	male	adult	Germany	Baden-Württemberg	Karlsruhe	8.48	48.97	31.05.2012	Höfer. H.	Meyer. F.	propylene glycol	SMNKARA09017
SMNK-ARA 09018	Araneae	Phrurolithidae	Phrurolithus festivus	male	adult	Germany	Baden-Württemberg	Karlsruhe	8.48	48.97	31.05.2012	Höfer. H.	Meyer. F.	propylene glycol	SMNKARA09018
SMNK-ARA 09020	Araneae	Thomisidae	Ozyptila simplex	male	adult	Germany	Baden-Württemberg	Karlsruhe	8.48	48.97	31.05.2012	Höfer. H.	Meyer. F.	propylene glycol	SMNKARA09020
SMNK-ARA 09022	Araneae	Lycosidae	Aulonia albimana	male	adult	Germany	Baden-Württemberg	Karlsruhe	8.48	48.97	17.05.2012	Höfer. H.	Meyer. F.	propylene glycol	SMNKARA09022
SMNK-ARA 09023	Araneae	Lycosidae	Aulonia albimana	male	adult	Germany	Baden-Württemberg	Karlsruhe	8.48	48.97	17.05.2012	Höfer. H.	Meyer. F.	propylene glycol	SMNKARA09023
SMNK-ARA 09024	Araneae	Lycosidae	Aulonia albimana	male	adult	Germany	Baden-Württemberg	Karlsruhe	8.48	48.97	17.05.2012	Höfer. H.	Meyer. F.	propylene glycol	SMNKARA09024
SMNK-ARA 09027	Araneae	Thomisidae	Ozyptila praticola	male	adult	Germany	Baden-Württemberg	Karlsruhe	8.48	48.97	16.06.2012	Höfer. H.	Meyer. F.	propylene glycol	SMNKARA09027
SMNK-ARA 09028	Araneae	Thomisidae	Ozyptila praticola	male	adult	Germany	Baden-Württemberg	Karlsruhe	8.48	48.97	16.06.2012	Höfer. H.	Meyer. F.	propylene glycol	SMNKARA09028
SMNK-ARA 09030	Araneae	Linyphiidae	Tenuiphantes flavipes	female	adult	Germany	Baden-Württemberg	Karlsruhe	8.48	48.97	16.06.2012	Höfer. H.	Meyer. F.	propylene glycol	SMNKARA09030
SMNK-ARA 09031	Araneae	Linyphiidae	Diplocephalus picinus	male	adult	Germany	Baden-Württemberg	Karlsruhe	8.48	48.97	16.06.2012	Höfer. H.	Meyer. F.	propylene glycol	SMNKARA09031
SMNK-ARA 09032	Araneae	Theridiidae	Enoplognatha thoracica	male	adult	Germany	Baden-Württemberg	Karlsruhe	8.48	48.97	16.06.2012	Höfer. H.	Meyer. F.	propylene glycol	SMNKARA09032
SMNK-ARA 09033	Araneae	Phrurolithidae	Phrurolithus festivus	male	adult	Germany	Baden-Württemberg	Karlsruhe	8.48	48.97	16.06.2012	Höfer. H.	Meyer. F.	propylene glycol	SMNKARA09033
SMNK-ARA 09034	Araneae	Gnaphosidae	Zelotes subterraneus	female	adult	Germany	Baden-Württemberg	Karlsruhe	8.48	48.97	16.06.2012	Höfer. H.	Meyer. F.	propylene glycol	SMNKARA09034
SMNK-ARA 09035	Araneae	Thomisidae	Ozyptila praticola	male	adult	Germany	Baden-Württemberg	Karlsruhe	8.48	48.97	16.06.2012	Höfer. H.	Meyer. F.	propylene glycol	SMNKARA09035
SMNK-ARA 09036	Araneae	Theridiidae	Robertus lividus	male	adult	Germany	Baden-Württemberg	Karlsruhe	8.48	48.97	16.06.2012	Höfer. H.	Meyer. F.	propylene glycol	SMNKARA09036
SMNK-ARA 09037	Araneae	Linyphiidae	Diplostyla concolor	male	adult	Germany	Baden-Württemberg	Karlsruhe	8.48	48.97	16.06.2012	Höfer. H.	Meyer. F.	propylene glycol	SMNKARA09037
SMNK-ARA 09038	Araneae	Linyphiidae	Diplocephalus picinus	male	adult	Germany	Baden-Württemberg	Karlsruhe	8.48	48.97	16.06.2012	Höfer. H.	Meyer. F.	propylene glycol	SMNKARA09038
SMNK-ARA 09039	Araneae	Linyphiidae	Diplocephalus picinus	female	adult	Germany	Baden-Württemberg	Karlsruhe	8.48	48.97	16.06.2012	Höfer. H.	Meyer. F.	propylene glycol	SMNKARA09039
SMNK-ARA 09040	Araneae	Linyphiidae	Maso sundevalli	male	adult	Germany	Baden-Württemberg	Karlsruhe	8.48	48.97	16.06.2012	Höfer. H.	Meyer. F.	propylene glycol	SMNKARA09040
SMNK-ARA 09041	Araneae	Linyphiidae	Maso sundevalli	male	adult	Germany	Baden-Württemberg	Karlsruhe	8.48	48.97	16.06.2012	Höfer. H.	Meyer. F.	propylene glycol	SMNKARA09041
SMNK-ARA 09042	Araneae	Linyphiidae	Maso sundevalli	male	adult	Germany	Baden-Württemberg	Karlsruhe	8.48	48.97	16.06.2012	Höfer. H.	Meyer. F.	propylene glycol	SMNKARA09042
SMNK-ARA 09044	Araneae	Gnaphosidae	Trachyzelotes pedestris	male	adult	Germany	Baden-Württemberg	Karlsruhe	8.48	48.97	09.06.2012	Höfer. H.	Meyer. F.	propylene glycol	SMNKARA09044
SMNK-ARA 09046	Araneae	Miturgidae	Zora spinimana	male	adult	Germany	Baden-Württemberg	Karlsruhe	8.48	48.97	09.06.2012	Höfer. H.	Meyer. F.	propylene glycol	SMNKARA09046
SMNK-ARA 09048	Araneae	Theridiidae	Euryopis flavomaculata	male	adult	Germany	Baden-Württemberg	Karlsruhe	8.48	48.97	09.06.2012	Höfer. H.	Meyer. F.	propylene glycol	SMNKARA09048
SMNK-ARA 09049	Araneae	Linyphiidae	Micrargus subaequalis	female	adult	Germany	Baden-Württemberg	Karlsruhe	8.48	48.97	09.06.2012	Höfer. H.	Meyer. F.	propylene glycol	SMNKARA09049
SMNK-ARA 09050	Araneae	Linyphiidae	Tenuiphantes flavipes	male	adult	Germany	Baden-Württemberg	Karlsruhe	8.48	48.97	09.06.2012	Höfer. H.	Meyer. F.	propylene glycol	SMNKARA09050
SMNK-ARA 09051	Araneae	Lycosidae	Pardosa prativaga	male	adult	Germany	Baden-Württemberg	Karlsruhe	8.48	48.97	09.06.2012	Höfer. H.	Meyer. F.	propylene glycol	SMNKARA09051
SMNK-ARA 09052	Araneae	Gnaphosidae	Trachyzelotes pedestris	male	adult	Germany	Baden-Württemberg	Karlsruhe	8.48	48.97	09.06.2012	Höfer. H.	Meyer. F.	propylene glycol	SMNKARA09052
SMNK-ARA 09053	Araneae	Linyphiidae	Tenuiphantes flavipes	female	adult	Germany	Baden-Württemberg	Karlsruhe	8.48	48.97	09.06.2012	Höfer. H.	Meyer. F.	propylene glycol	SMNKARA09053
SMNK-ARA 09054	Araneae	Gnaphosidae	Drassyllus pusillus	female	adult	Germany	Baden-Württemberg	Karlsruhe	8.48	48.97	24.04.2012	Höfer. H.	Meyer. F.	propylene glycol	SMNKARA09054
SMNK-ARA 09056	Araneae	Linyphiidae	Agyneta mollis	male	adult	Germany	Baden-Württemberg	Karlsruhe	8.48	48.97	24.04.2012	Höfer. H.	Meyer. F.	propylene glycol	SMNKARA09056
SMNK-ARA 09057	Araneae	Linyphiidae	Dicymbium nigrum brevisetosum	male	adult	Germany	Baden-Württemberg	Karlsruhe	8.48	48.97	24.04.2012	Höfer. H.	Meyer. F.	propylene glycol	SMNKARA09057
SMNK-ARA 09058	Araneae	Linyphiidae	Diplostyla concolor	female	adult	Germany	Baden-Württemberg	Karlsruhe	8.48	48.97	24.04.2012	Höfer. H.	Meyer. F.	propylene glycol	SMNKARA09058
SMNK-ARA 09059	Araneae	Linyphiidae	Diplostyla concolor	female	adult	Germany	Baden-Württemberg	Karlsruhe	8.48	48.97	24.04.2012	Höfer. H.	Meyer. F.	propylene glycol	SMNKARA09059
SMNK-ARA 09060	Araneae	Lycosidae	Pardosa prativaga	male	adult	Germany	Baden-Württemberg	Karlsruhe	8.48	48.97	01.05.2012	Höfer. H.	Meyer. F.	propylene glycol	SMNKARA09060
SMNK-ARA 09061	Araneae	Miturgidae	Zora spinimana	male	adult	Germany	Baden-Württemberg	Karlsruhe	8.48	48.97	01.05.2012	Höfer. H.	Meyer. F.	propylene glycol	SMNKARA09061
SMNK-ARA 09062	Araneae	Gnaphosidae	Zelotes latreillei	male	adult	Germany	Baden-Württemberg	Karlsruhe	8.48	48.97	01.05.2012	Höfer. H.	Meyer. F.	propylene glycol	SMNKARA09062
SMNK-ARA 09063	Araneae	Linyphiidae	Agyneta affinis	male	adult	Germany	Baden-Württemberg	Karlsruhe	8.48	48.97	01.05.2012	Höfer. H.	Meyer. F.	propylene glycol	SMNKARA09063
SMNK-ARA 09064	Araneae	Linyphiidae	Agyneta mollis	female	adult	Germany	Baden-Württemberg	Karlsruhe	8.48	48.97	01.05.2012	Höfer. H.	Meyer. F.	propylene glycol	SMNKARA09064
SMNK-ARA 09065	Araneae	Liocranidae	Apostenus fuscus	male	adult	Germany	Baden-Württemberg	Karlsruhe	8.48	48.97	17.05.2012	Höfer. H.	Meyer. F.	propylene glycol	SMNKARA09065
SMNK-ARA 09066	Araneae	Thomisidae	Ozyptila simplex	female	adult	Germany	Baden-Württemberg	Karlsruhe	8.48	48.97	17.05.2012	Höfer. H.	Meyer. F.	propylene glycol	SMNKARA09066
SMNK-ARA 09067	Araneae	Gnaphosidae	Drassyllus lutetianus	male	adult	Germany	Baden-Württemberg	Karlsruhe	8.48	48.97	17.05.2012	Höfer. H.	Meyer. F.	propylene glycol	SMNKARA09067
SMNK-ARA 09068	Araneae	Zodariidae	Zodarion italicum	female	adult	Germany	Baden-Württemberg	Karlsruhe	8.48	48.97	17.05.2012	Höfer. H.	Meyer. F.	propylene glycol	SMNKARA09068
SMNK-ARA 09069	Araneae	Linyphiidae	Diplostyla concolor	male	adult	Germany	Baden-Württemberg	Karlsruhe	8.48	48.97	17.05.2012	Höfer. H.	Meyer. F.	propylene glycol	SMNKARA09069
SMNK-ARA 09070	Araneae	Lycosidae	Pardosa prativaga	female	adult	Germany	Baden-Württemberg	Karlsruhe	8.48	48.97	24.05.2012	Höfer. H.	Meyer. F.	propylene glycol	SMNKARA09070
SMNK-ARA 09071	Araneae	Lycosidae	Pardosa saltans	male	adult	Germany	Baden-Württemberg	Karlsruhe	8.48	48.97	24.05.2012	Höfer. H.	Meyer. F.	propylene glycol	SMNKARA09071
SMNK-ARA 09072	Araneae	Gnaphosidae	Drassyllus lutetianus	male	adult	Germany	Baden-Württemberg	Karlsruhe	8.48	48.97	31.05.2012	Höfer. H.	Meyer. F.	propylene glycol	SMNKARA09072
SMNK-ARA 09073	Araneae	Linyphiidae	Micrargus subaequalis	female	adult	Germany	Baden-Württemberg	Karlsruhe	8.48	48.97	31.05.2012	Höfer. H.	Meyer. F.	propylene glycol	SMNKARA09073
SMNK-ARA 09074	Araneae	Linyphiidae	Agyneta mollis	male	adult	Germany	Baden-Württemberg	Karlsruhe	8.48	48.97	09.05.2012	Höfer. H.	Meyer. F.	propylene glycol	SMNKARA09074
SMNK-ARA 09075	Araneae	Linyphiidae	Dicymbium nigrum	female	adult	Germany	Baden-Württemberg	Karlsruhe	8.48	48.97	09.05.2012	Höfer. H.	Meyer. F.	propylene glycol	SMNKARA09075
SMNK-ARA 09076	Araneae	Gnaphosidae	Drassyllus praeficus	male	adult	Germany	Baden-Württemberg	Karlsruhe	8.48	48.97	31.05.2012	Höfer. H.	Meyer. F.	propylene glycol	SMNKARA09076
SMNK-ARA 09077	Araneae	Linyphiidae	Walckenaeria dysderoides	female	adult	Germany	Baden-Württemberg	Karlsruhe	8.48	48.97	31.05.2012	Höfer. H.	Meyer. F.	propylene glycol	SMNKARA09077
SMNK-ARA 09078	Araneae	Lycosidae	Trochosa ruricola	male	adult	Germany	Baden-Württemberg	Karlsruhe	8.48	48.97	31.05.2012	Höfer. H.	Meyer. F.	propylene glycol	SMNKARA09078
SMNK-ARA 09079	Araneae	Gnaphosidae	Micaria pulicaria	male	adult	Germany	Baden-Württemberg	Karlsruhe	8.48	48.97	24.05.2012	Höfer. H.	Meyer. F.	propylene glycol	SMNKARA09079
SMNK-ARA 09080	Araneae	Salticidae	Pellenes tripunctatus	male	adult	Germany	Baden-Württemberg	Buttenhausen	9.48	48.36	11.06.2013	Höfer. H.	Höfer. H.	ethanol 70%	SMNKARA09080
SMNK-ARA 09081	Araneae	Filistatidae	Filistata insidiatrix	female	adult	France	Hérault	Agel	8.48	48.97	11.06.2013	Höfer. H.	Höfer. H.	ethanol 70%	SMNKARA09081
SMNK-ARA 09082	Araneae	Linyphiidae	Lepthyphantes leprosus	male	adult	Germany	Baden-Württemberg	Karlsruhe	8.48	48.97	23.05.2012	Höfer. H.	Höfer. H.	ethanol 70%	SMNKARA09082
SMNK-ARA 09083	Araneae	Thomisidae	Tmarus piger	female	adult	France	Midi-Pyrénées	Verrières	3.08	44.18	08.05.2013	Höfer. H.	Höfer. H.	ethanol 70%	SMNKARA09083
SMNK-ARA 09084	Araneae	Lycosidae	Alopecosa barbipes	female	adult	France	Puy-de-Dôme	Monts du Cantal	2.76	45.12	07.06.2013	Höfer. H.	Höfer. H.	ethanol 70%	SMNKARA09084
SMNK-ARA 09085	Araneae	Lycosidae	Pardosa bifasciata	male	adult	Germany	Baden-Württemberg	Wasserstetten	9.55	48.36	11.06.2013	Höfer. H.	Höfer. H.	ethanol 70%	SMNKARA09085
SMNK-ARA 09086	Araneae	Lycosidae	Pardosa bifasciata	male	adult	Germany	Baden-Württemberg	Wasserstetten	9.55	48.36	11.06.2013	Höfer. H.	Höfer. H.	ethanol 70%	SMNKARA09086
SMNK-ARA 09087	Araneae	Lycosidae	Pardosa bifasciata	male	adult	Germany	Baden-Württemberg	Wasserstetten	9.55	48.36	11.06.2013	Höfer. H.	Höfer. H.	ethanol 70%	SMNKARA09087
SMNK-ARA 09088	Araneae	Theridiidae	Asagena phalerata	male	adult	Germany	Baden-Württemberg	Wasserstetten	9.55	48.36	11.06.2013	Höfer. H.	Höfer. H.	ethanol 70%	SMNKARA09088
SMNK-ARA 09089	Araneae	Linyphiidae	Tenuiphantes flavipes	female	adult	Germany	Baden-Württemberg	Keltern	8.58	48.9	09.04.2013	Meyer. F.	Meyer. F.	ethanol 70%	SMNKARA09089
SMNK-ARA 09091	Araneae	Linyphiidae	Microneta viaria	female	adult	Germany	Baden-Württemberg	Keltern	8.58	48.9	09.04.2013	Höfer. H.	Meyer. F.	ethanol 70%	SMNKARA09091
SMNK-ARA 09092	Araneae	Linyphiidae	Microneta viaria	female	adult	Germany	Baden-Württemberg	Keltern	8.58	48.9	09.04.2013	Höfer. H.	Meyer. F.	ethanol 70%	SMNKARA09092
SMNK-ARA 09094	Araneae	Linyphiidae	Microneta viaria	female	adult	Germany	Baden-Württemberg	Keltern	8.58	48.9	09.04.2013	Höfer. H.	Meyer. F.	ethanol 70%	SMNKARA09094
SMNK-ARA 09095	Araneae	Linyphiidae	Macrargus rufus	female	adult	Germany	Baden-Württemberg	Keltern	8.58	48.9	09.04.2013	Zarte. N.	Meyer. F.	ethanol 70%	SMNKARA09095
SMNK-ARA 09097	Araneae	Araneidae	Nuctenea umbratica	male	adult	Germany	Baden-Württemberg	Karlsruhe	8.48	48.97	15.06.2013	Höfer. H.	Höfer. H.	ethanol 70%	SMNKARA09097
SMNK-ARA 09098	Araneae	Salticidae	Heliophanus dampfi	female	adult	Germany	Baden-Württemberg	Schliffkopf	8.22	48.55	19.06.2013	Höfer. H.	Höfer. H.	ethanol 70%	SMNKARA09098
SMNK-ARA 09099	Araneae	Linyphiidae	Frontinellina frutetorum	female	adult	France	Midi-Pyrénées	Verrières	3.08	44.18	07.06.2013	Höfer. H.	Höfer. H.	ethanol 70%	SMNKARA09099
SMNK-ARA 10000	Araneae	Linyphiidae	Frontinellina frutetorum	male	adult	France	Midi-Pyrénées	Verrières	3.08	44.18	07.06.2013	Höfer. H.	Höfer. H.	ethanol 70%	SMNKARA10000
SMNK-ARA 10001	Araneae	Linyphiidae	Frontinellina frutetorum	male	adult	France	Midi-Pyrénées	Verrières	3.08	44.18	07.06.2013	Höfer. H.	Höfer. H.	ethanol 70%	SMNKARA10001
SMNK-ARA 10002	Araneae	Linyphiidae	Frontinellina frutetorum	female	adult	France	Midi-Pyrénées	Verrières	3.08	44.18	07.06.2013	Höfer. H.	Höfer. H.	ethanol 70%	SMNKARA10002
SMNK-ARA 10003	Araneae	Linyphiidae	Cnephalocotes obscurus	male	adult	Germany	Baden-Württemberg	Keltern	8.58	48.89	16.04.2013	Höfer. H.	Wesseloh. C.	propylene glycol	SMNKARA10003
SMNK-ARA 10006	Araneae	Araneidae	Araniella alpica	female	adult	Germany	Baden-Württemberg	Schliffkopf	8.22	48.55	19.06.2013	Höfer. H.	Höfer. H.	ethanol 70%	SMNKARA10006
SMNK-ARA 10007	Araneae	Araneidae	Araniella alpica	female	adult	Germany	Baden-Württemberg	Schliffkopf	8.22	48.55	19.06.2013	Höfer. H.	Höfer. H.	ethanol 70%	SMNKARA10007
SMNK-ARA 10008	Araneae	Araneidae	Araniella cucurbitina	male	adult	Germany	Baden-Württemberg	Schliffkopf	8.22	48.55	19.06.2013	Höfer. H.	Höfer. H.	ethanol 70%	SMNKARA10008
SMNK-ARA 10009	Araneae	Araneidae	Araniella cucurbitina	male	adult	Germany	Baden-Württemberg	Schliffkopf	8.22	48.55	19.06.2013	Höfer. H.	Höfer. H.	ethanol 70%	SMNKARA10009
SMNK-ARA 10010	Araneae	Araneidae	Araniella cucurbitina	male	adult	Germany	Baden-Württemberg	Schliffkopf	8.22	48.55	19.06.2013	Höfer. H.	Höfer. H.	ethanol 70%	SMNKARA10010
SMNK-ARA 10011	Araneae	Araneidae	Hypsosinga sanguinea	male	adult	Germany	Baden-Württemberg	Schliffkopf	8.22	48.55	19.06.2013	Höfer. H.	Höfer. H.	ethanol 70%	SMNKARA10011
SMNK-ARA 10012	Araneae	Araneidae	Hypsosinga sanguinea	male	adult	Germany	Baden-Württemberg	Schliffkopf	8.22	48.51	19.06.2013	Höfer. H.	Höfer. H.	ethanol 70%	SMNKARA10012
SMNK-ARA 10013	Araneae	Theridiidae	Phylloneta sisyphia	female	adult	Germany	Baden-Württemberg	Schliffkopf	8.22	48.55	19.06.2013	Höfer. H.	Höfer. H.	ethanol 70%	SMNKARA10013
SMNK-ARA 10014	Araneae	Theridiidae	Phylloneta sisyphia	male	adult	Germany	Baden-Württemberg	Schliffkopf	8.22	48.55	19.06.2013	Höfer. H.	Höfer. H.	ethanol 70%	SMNKARA10014
SMNK-ARA 10015	Araneae	Philodromidae	Philodromus aureolus	male	adult	Germany	Baden-Württemberg	Schliffkopf	8.22	48.55	19.06.2013	Höfer. H.	Höfer. H.	ethanol 70%	SMNKARA10015
SMNS-Aran-1000	Araneae	Agelenidae	Coelotes terrestris	female	adult	Germany	Baden-Württemberg	FR. Feldberg. Todtnauer Hütte	8	47.87	11.07.2013	Holstein. J.	Holstein. J.	ethanol 100%	SMNSAran1000
SMNS-Aran-1001	Araneae	Lycosidae	Pardosa amentata	female	adult	Germany	Baden-Württemberg	FR. Feldberg. Todtnauer Hütte	8	47.87	11.07.2013	Holstein. J.	Holstein. J.	ethanol 100%	SMNSAran1001
SMNS-Aran-1004	Araneae	Clubionidae	Clubiona reclusa	female	adult	Germany	Baden-Württemberg	FR. Feldberg. Todtnauer Hütte	8	47.87	11.07.2013	Holstein. J.	Holstein. J.	ethanol 100%	SMNSAran1004
SMNS-Aran-1005	Araneae	Araneidae	Aculepeira ceropegia	male	adult	Germany	Baden-Württemberg	FR. Feldberg. Todtnauer Hütte	8	47.87	11.07.2013	Holstein. J.	Holstein. J.	ethanol 100%	SMNSAran1005
SMNS-Aran-1007	Araneae	Thomisidae	Xysticus cristatus	female	adult	Germany	Baden-Württemberg	FR. Feldberg. Todtnauer Hütte	8	47.87	11.07.2013	Holstein. J.	Holstein. J.	ethanol 100%	SMNSAran1007
SMNS-Aran-1008	Araneae	Lycosidae	Pardosa amentata	female	adult	Germany	Baden-Württemberg	FR. Feldberg. Todtnauer Hütte	8	47.87	11.07.2013	Holstein. J.	Holstein. J.	ethanol 100%	SMNSAran1008
SMNS-Aran-1009	Araneae	Tetragnathidae	Tetragnatha extensa	female	adult	Germany	Baden-Württemberg	FR. Feldberg. Todtnauer Hütte	8	47.87	11.07.2013	Holstein. J.	Holstein. J.	ethanol 100%	SMNSAran1009
SMNS-Aran-1010	Araneae	Araneidae	Araneus quadratus	female	subadult	Germany	Baden-Württemberg	FR. Feldberg. Todtnauer Hütte	8	47.87	11.07.2013	Holstein. J.	Holstein. J.	ethanol 100%	SMNSAran1010
SMNS-Aran-1011	Araneae	Salticidae	Heliophanus dampfi	male	adult	Germany	Baden-Württemberg	FR. Feldberg. Todtnauer Hütte	8	47.87	11.07.2013	Holstein. J.	Holstein. J.	ethanol 100%	SMNSAran1011
SMNS-Aran-1012	Araneae	Araneidae	Aculepeira ceropegia	male	juvenile	Germany	Baden-Württemberg	FR. Feldberg. Todtnauer Hütte	8	47.87	11.07.2013	Holstein. J.	Holstein. J.	ethanol 100%	SMNSAran1012
SMNS-Aran-1016	Araneae	Theridiidae	Phylloneta impressa	female	adult	Germany	Baden-Württemberg	FR. Feldberg. Todtnauer Hütte	8	47.87	11.07.2013	Holstein. J.	Holstein. J.	ethanol 100%	SMNSAran1016
SMNS-Aran-1017	Araneae	Tetragnathidae	Metellina mengei	female	adult	Germany	Baden-Württemberg	FR. Feldberg. Todtnauer Hütte	8	47.87	11.07.2013	Holstein. J.	Holstein. J.	ethanol 100%	SMNSAran1017
SMNS-Aran-1018	Araneae	Clubionidae	Clubiona reclusa	female	adult	Germany	Baden-Württemberg	FR. Feldberg. Todtnauer Hütte	8	47.87	11.07.2013	Holstein. J.	Holstein. J.	ethanol 100%	SMNSAran1018
SMNS-Aran-1019	Araneae	Araneidae	Gibbaranea omoeda	female	subadult	Germany	Baden-Württemberg	FR. Feldberg. Todtnauer Hütte	8	47.87	11.07.2013	Holstein. J.	Holstein. J.	ethanol 100%	SMNSAran1019
SMNS-Aran-1021	Araneae	Thomisidae	Misumena vatia	female	juvenile	Germany	Baden-Württemberg	WN. Menzlesmühle	9.69	48.92	10.07.2013	Krogmann. L.; Kothe. T.	Holstein. J.	ethanol 100%	SMNSAran1021
SMNS-Aran-1023	Araneae	Philodromidae	Philodromus aureolus	male	adult	Germany	Baden-Württemberg	WN. Menzlesmühle	9.69	48.92	10.07.2013	Krogmann. L.; Kothe. T.	Holstein. J.	ethanol 100%	SMNSAran1023
SMNS-Aran-1024	Araneae	Linyphiidae	Neriene radiata	female	adult	Germany	Baden-Württemberg	WN. Menzlesmühle	9.69	48.92	10.07.2013	Krogmann. L.; Kothe. T.	Holstein. J.	ethanol 100%	SMNSAran1024
SMNS-Aran-1026	Araneae	Salticidae	Evarcha arcuata	male	adult	Germany	Baden-Württemberg	WN. Menzlesmühle	9.69	48.92	10.07.2013	Krogmann. L.; Kothe. T.	Holstein. J.	ethanol 100%	SMNSAran1026
SMNS-Aran-1027	Araneae	Linyphiidae	Neriene radiata	male	adult	Germany	Baden-Württemberg	WN. Menzlesmühle	9.69	48.92	10.07.2013	Krogmann. L.; Kothe. T.	Holstein. J.	ethanol 100%	SMNSAran1027
SMNS-Aran-1029	Araneae	Araneidae	Aculepeira ceropegia	female	adult	Germany	Baden-Württemberg	WN. Menzlesmühle	9.69	48.92	10.07.2013	Krogmann. L.; Kothe. T.	Holstein. J.	ethanol 100%	SMNSAran1029
SMNS-Aran-1031	Araneae	Philodromidae	Philodromus collinus	male	adult	Germany	Baden-Württemberg	GP. Unterböhringen	9.74	48.62	17.07.2013	Holstein. J.	Holstein. J.	ethanol 100%	SMNSAran1031
SMNS-Aran-1032	Araneae	Thomisidae	Xysticus bifasciatus	male	juvenile	Germany	Baden-Württemberg	GP. Unterböhringen	9.74	48.62	17.07.2013	Holstein. J.	Holstein. J.	ethanol 100%	SMNSAran1032
SMNS-Aran-1036	Araneae	Pisauridae	Pisaura mirabilis	female	adult	Germany	Baden-Württemberg	TBB. Tauberbischofsheim	9.71	49.62	18.07.2013	Kothe. T.; König. Ch.	Holstein. J.	ethanol 100%	SMNSAran1036
SMNS-Aran-1038	Araneae	Pisauridae	Pisaura mirabilis	female	adult	Germany	Baden-Württemberg	BB. Grafenberg	8.92	48.58	19.07.2013	Krogmann. L.; Kothe. T.	Holstein. J.	ethanol 100%	SMNSAran1038
SMNS-Aran-1040	Araneae	Araneidae	Argiope bruennichi	male	adult	Germany	Baden-Württemberg	ES. Kirchheim; Teck. Hörnle	9.41	48.61	23.07.2013	Wendt. I.	Holstein. J.	ethanol 100%	SMNSAran1040
SMNS-Aran-1041	Araneae	Thomisidae	Xysticus acerbus	male	subadult	Germany	Baden-Württemberg	ES. Kirchheim; Teck. Hörnle	9.41	48.61	23.07.2013	Wendt. I.	Holstein. J.	ethanol 100%	SMNSAran1041
SMNS-Aran-1043	Araneae	Theridiidae	Enoplognatha ovata	female	adult	Germany	Baden-Württemberg	ES. Ohmden	9.54	48.65	23.07.2013	Wendt. I.	Holstein. J.	ethanol 100%	SMNSAran1043
SMNS-Aran-1044	Araneae	Theridiidae	Enoplognatha ovata	female	adult	Germany	Baden-Württemberg	ES. Ohmden	9.54	48.65	23.07.2013	Wendt. I.	Holstein. J.	ethanol 100%	SMNSAran1044
SMNS-Aran-1050	Araneae	Tetragnathidae	Metellina segmentata	female	adult	Germany	Baden-Württemberg	LÖ. Grenzach-Whylen	7.69	47.55	06.08.2013	Kothe. T.; Bergmann. P.	Holstein. J.	ethanol 100%	SMNSAran1050
SMNS-Aran-1051	Araneae	Lycosidae	Pardosa lugubris	female	subadult	Germany	Baden-Württemberg	LÖ. Grenzach-Whylen	7.69	47.55	06.08.2013	Kothe. T.; Bergmann. P.	Holstein. J.	ethanol 100%	SMNSAran1051
SMNS-Aran-1053	Araneae	Araneidae	Argiope bruennichi	female	adult	Germany	Baden-Württemberg	FR. Grißheim	7.57	47.89	07.08.2013	Kothe. T.; Bergmann. P.	Holstein. J.	ethanol 100%	SMNSAran1053
SMNS-Aran-1054	Araneae	Araneidae	Argiope bruennichi	female	subadult	Germany	Baden-Württemberg	FR. Grißheim	7.57	47.89	07.08.2013	Kothe. T.; Bergmann. P.	Holstein. J.	ethanol 100%	SMNSAran1054
SMNS-Aran-1055	Araneae	Araneidae	Argiope bruennichi	female	adult	Germany	Baden-Württemberg	FR. Grißheim	7.57	47.89	07.08.2013	Kothe. T.; Bergmann. P.	Holstein. J.	ethanol 100%	SMNSAran1055
SMNS-Aran-1059	Araneae	Oxyopidae	Oxyopes ramosus	female	juvenile	Germany	Baden-Württemberg	FR. Grißheim	7.57	47.89	07.08.2013	Kothe. T.; Bergmann. P.	Holstein. J.	ethanol 100%	SMNSAran1059
SMNS-Aran-1060	Araneae	Thomisidae	Misumena vatia	female	juvenile	Germany	Baden-Württemberg	FR. Grißheim	7.57	47.89	07.08.2013	Kothe. T.; Bergmann. P.	Holstein. J.	ethanol 100%	SMNSAran1060
SMNS-Aran-1062	Araneae	Theridiidae	Enoplognatha ovata	female	adult	Germany	Baden-Württemberg	FR. Grißheim	7.57	47.89	07.08.2013	Kothe. T.; Bergmann. P.	Holstein. J.	ethanol 100%	SMNSAran1062
SMNS-Aran-1063	Araneae	Tetragnathidae	Tetragnatha nigrita	male	adult	Germany	Baden-Württemberg	FR. Grißheim	7.57	47.89	07.08.2013	Kothe. T.; Bergmann. P.	Holstein. J.	ethanol 100%	SMNSAran1063
SMNS-Aran-1064	Araneae	Tetragnathidae	Tetragnatha nigrita	female	adult	Germany	Baden-Württemberg	FR. Grißheim	7.57	47.89	07.08.2013	Kothe. T.; Bergmann. P.	Holstein. J.	ethanol 100%	SMNSAran1064
SMNS-Aran-1065	Araneae	Thomisidae	Xysticus acerbus	female	adult	Germany	Baden-Württemberg	FR. Grißheim	7.57	47.89	07.08.2013	Kothe. T.; Bergmann. P.	Holstein. J.	ethanol 100%	SMNSAran1065
SMNS-Aran-1069	Araneae	Thomisidae	Thomisus onustus	female	juvenile	Germany	Baden-Württemberg	FR. Grißheim	7.57	47.89	07.08.2013	Kothe. T.; Bergmann. P.	Holstein. J.	ethanol 100%	SMNSAran1069
SMNS-Aran-1070	Araneae	Araneidae	Agalenatea redii	female	juvenile	Germany	Baden-Württemberg	FR. Grißheim	7.57	47.89	07.08.2013	Kothe. T.; Bergmann. P.	Holstein. J.	ethanol 100%	SMNSAran1070
SMNS-Aran-1077	Araneae	Araneidae	Araneus sturmi	female	adult	Germany	Baden-Württemberg	FR. Grißheim	7.57	47.89	07.08.2013	Kothe. T.; Bergmann. P.	Holstein. J.	ethanol 100%	SMNSAran1077
SMNS-Aran-1078	Araneae	Thomisidae	Ebrechtella tricuspidata	male	juvenile	Germany	Baden-Württemberg	FR. Grißheim	7.57	47.89	07.08.2013	Kothe. T.; Bergmann. P.	Holstein. J.	ethanol 100%	SMNSAran1078
SMNS-Aran-1082	Araneae	Araneidae	Araneus quadratus	female	adult	Germany	Baden-Württemberg	AA. Bartholomä	9.95	48.73	09.09.2013	Holstein. J.; Leidenroth	Holstein. J.	ethanol 100%	SMNSAran1082
SMNS-Aran-1083	Araneae	Araneidae	Araneus quadratus	female	adult	Germany	Baden-Württemberg	AA. Bartholomä	9.95	48.73	09.09.2013	Holstein. J.; Leidenroth	Holstein. J.	ethanol 100%	SMNSAran1083
SMNS-Aran-1084	Araneae	Araneidae	Araneus diadematus	female	adult	Germany	Baden-Württemberg	AA. Bartholomä	9.95	48.73	09.09.2013	Holstein. J.; Leidenroth	Holstein. J.	ethanol 100%	SMNSAran1084
SMNS-Aran-1085	Araneae	Lycosidae	Pardosa pullata	female	adult	Germany	Baden-Württemberg	AA. Bartholomä	9.95	48.73	09.09.2013	Holstein. J.; Leidenroth	Holstein. J.	ethanol 100%	SMNSAran1085
SMNS-Aran-1087	Araneae	Lycosidae	Pardosa amentata	female	subadult	Germany	Baden-Württemberg	AA. Bartholomä	9.95	48.73	09.09.2013	Holstein. J.; Leidenroth	Holstein. J.	ethanol 100%	SMNSAran1087
SMNS-Aran-1088	Araneae	Lycosidae	Pardosa amentata	female	subadult	Germany	Baden-Württemberg	AA. Bartholomä	9.95	48.73	09.09.2013	Holstein. J.; Leidenroth	Holstein. J.	ethanol 100%	SMNSAran1088
SMNS-Aran-1089	Araneae	Lycosidae	Pardosa pullata	female	adult	Germany	Baden-Württemberg	AA. Bartholomä	9.95	48.73	09.09.2013	Holstein. J.; Leidenroth	Holstein. J.	ethanol 100%	SMNSAran1089
SMNS-Aran-1090	Araneae	Lycosidae	Pardosa amentata	male	subadult	Germany	Baden-Württemberg	AA. Bartholomä	9.95	48.73	09.09.2013	Holstein. J.; Leidenroth	Holstein. J.	ethanol 100%	SMNSAran1090
SMNS-Aran-1091	Araneae	Lycosidae	Pardosa pullata	female	adult	Germany	Baden-Württemberg	AA. Bartholomä	9.95	48.73	09.09.2013	Holstein. J.; Leidenroth	Holstein. J.	ethanol 100%	SMNSAran1091
SMNS-Aran-1092	Araneae	Lycosidae	Pardosa amentata	female	subadult	Germany	Baden-Württemberg	AA. Bartholomä	9.95	48.73	09.09.2013	Holstein. J.; Leidenroth	Holstein. J.	ethanol 100%	SMNSAran1092
SMNS-Aran-1093	Araneae	Lycosidae	Pardosa amentata	male	subadult	Germany	Baden-Württemberg	AA. Bartholomä	9.95	48.73	09.09.2013	Holstein. J.; Leidenroth	Holstein. J.	ethanol 100%	SMNSAran1093
SMNS-Aran-1094	Araneae	Lycosidae	Pardosa amentata	female	subadult	Germany	Baden-Württemberg	AA. Bartholomä	9.95	48.73	09.09.2013	Holstein. J.; Leidenroth	Holstein. J.	ethanol 100%	SMNSAran1094
SMNS-Aran-1095	Araneae	Araneidae	Larinioides cornutus	male	juvenile	Germany	Baden-Württemberg	AA. Bartholomä	10.02	48.73	09.09.2013	Holstein. J.; Leidenroth	Holstein. J.	ethanol 100%	SMNSAran1095
SMNS-Aran-1096	Araneae	Linyphiidae	Linyphia triangularis	female	adult	Germany	Baden-Württemberg	AA. Bartholomä	10.02	48.73	09.09.2013	Holstein. J.; Leidenroth	Holstein. J.	ethanol 100%	SMNSAran1096
SMNS-Aran-1097	Araneae	Tetragnathidae	Metellina segmentata	female	adult	Germany	Baden-Württemberg	AA. Bartholomä	10.02	48.73	09.09.2013	Holstein. J.; Leidenroth	Holstein. J.	ethanol 100%	SMNSAran1097
SMNS-Aran-1098	Araneae	Scytodidae	Scytodes thoracica	male	adult	Germany	Baden-Württemberg	GP. Gingen	9.78	48.66	05.11.2013	Holstein. J.	Holstein. J.	ethanol 100%	SMNSAran1098
SMNS-Aran-1099	Araneae	Theridiidae	Steatoda triangulosa	male	adult	Germany	Baden-Württemberg	S. Stuttgart	9.21	48.8	05.11.2013	Holstein. J.	Holstein. J.	ethanol 100%	SMNSAran1099
SMNS-Aran-1101	Araneae	Agelenidae	Eratigena atrica	female	adult	Germany	Baden-Württemberg	GP. Gingen	9.78	48.66	08.01.2014	Holstein. J.	Holstein. J.	ethanol 100%	SMNSAran1101
SMNS-Aran-1102	Araneae	Theridiidae	Steatoda triangulosa	female	adult	Germany	Baden-Württemberg	GP. Gingen	9.78	48.66	05.02.2014	Holstein. J.	Holstein. J.	ethanol 100%	SMNSAran1102
SMNS-Aran-1109	Araneae	Theridiidae	Robertus lividus	male	adult	Germany	Baden-Württemberg	S. Leinfelden-Echterdingen. Musberg	9.09	48.68	09.10.2013	Selzer. P.	Holstein. J.	ethanol 100%	SMNSAran1109
SMNS-Aran-1116	Araneae	Linyphiidae	Tiso vagans	male	adult	Germany	Baden-Württemberg	WN. Winterbach	9.5	48.79	22.06.2013	Wendt. I.	Holstein. J.	ethanol 100%	SMNSAran1116
SMNS-Aran-1119	Araneae	Linyphiidae	Agyneta rurestris	male	adult	Germany	Sachsen	ZI. Großschönau. An der Poche	14.69	50.88	01.08.2013	Krogmann. L.; Kothe. T.	Holstein. J.	ethanol 100%	SMNSAran1119
SMNS-Aran-1120	Araneae	Tetragnathidae	Metellina segmentata	male	adult	Germany	Sachsen	GR. Oppach	14.49	51.06	21.09.2013	Hornig. U.	Holstein. J.	ethanol 100%	SMNSAran1120
SMNS-Aran-1124	Araneae	Philodromidae	Philodromus aureolus	male	adult	Germany	Baden-Württemberg	S. Hohenheim	9.21	48.71	29.06.2011	Wendt. I.	Holstein. J.	ethanol 100%	SMNSAran1124
SMNS-Aran-1137	Araneae	Thomisidae	Thomisus onustus	female	subadult	Croatia	Istria	near Rovinj	13.7	45	20.05.2013	Steidle. H.	Wendt. I.	ethanol 100%	SMNSAran1137
SMNS-Aran-1140	Araneae	Linyphiidae	Linyphia triangularis	female	subadult	Germany	Niedersachsen	Lüchow-Dannenberg. Brünkendorf	11.44	53.07	09.08.2013	Krogmann. L.	Holstein. J.	ethanol 100%	SMNSAran1140
SMNS-Aran-1141	Araneae	Linyphiidae	Linyphia triangularis	female	adult	Germany	Niedersachsen	Lüchow-Dannenberg. Brünkendorf	11.44	53.07	09.08.2013	Krogmann. L.	Holstein. J.	ethanol 100%	SMNSAran1141
SMNS-Aran-1142	Araneae	Linyphiidae	Linyphia triangularis	male	adult	Germany	Niedersachsen	Lüchow-Dannenberg. Brünkendorf	11.44	53.07	09.08.2013	Krogmann. L.	Holstein. J.	ethanol 100%	SMNSAran1142
SMNS-Aran-1143	Araneae	Araneidae	Argiope bruennichi	female	adult	Germany	Niedersachsen	Lüchow-Dannenberg. Brünkendorf	11.44	53.07	09.08.2013	Krogmann. L.	Holstein. J.	ethanol 100%	SMNSAran1143
SMNS-Aran-1144	Araneae	Pisauridae	Pisaura mirabilis	female	adult	Germany	Niedersachsen	Lüchow-Dannenberg. Brünkendorf	11.44	53.07	09.08.2013	Krogmann. L.	Holstein. J.	ethanol 100%	SMNSAran1144
SMNS-Aran-1146	Araneae	Theridiidae	Enoplognatha ovata	female	adult	Germany	Niedersachsen	Lüchow-Dannenberg. Brünkendorf	11.44	53.07	09.08.2013	Krogmann. L.	Holstein. J.	ethanol 100%	SMNSAran1146
SMNS-Aran-1148	Araneae	Araneidae	Araneus quadratus	female	subadult	Germany	Niedersachsen	Lüchow-Dannenberg. Brünkendorf	11.44	53.07	09.08.2013	Krogmann. L.	Holstein. J.	ethanol 100%	SMNSAran1148
SMNS-Aran-1149	Araneae	Araneidae	Araneus quadratus	male	adult	Germany	Niedersachsen	Lüchow-Dannenberg. Brünkendorf	11.44	53.07	09.08.2013	Krogmann. L.	Holstein. J.	ethanol 100%	SMNSAran1149
SMNS-Aran-1150	Araneae	Thomisidae	Xysticus cristatus	female	adult	Germany	Niedersachsen	Lüchow-Dannenberg. Brünkendorf	11.44	53.07	09.08.2013	Krogmann. L.	Holstein. J.	ethanol 100%	SMNSAran1150
SMNS-Aran-1151	Araneae	Araneidae	Hypsosinga pygmaea	female	adult	Germany	Niedersachsen	Lüchow-Dannenberg. Brünkendorf	11.44	53.07	09.08.2013	Krogmann. L.	Holstein. J.	ethanol 100%	SMNSAran1151
SMNS-Aran-1152	Araneae	Gnaphosidae	Haplodrassus signifer	female	juvenile	Germany	Niedersachsen	Lüchow-Dannenberg. Brünkendorf	11.44	53.07	09.08.2013	Krogmann. L.	Holstein. J.	ethanol 100%	SMNSAran1152
SMNS-Aran-1153	Araneae	Thomisidae	Xysticus striatipes	female	subadult	Germany	Niedersachsen	Lüchow-Dannenberg. Brünkendorf	11.44	53.07	09.08.2013	Krogmann. L.	Holstein. J.	ethanol 100%	SMNSAran1153
SMNS-Aran-741	Araneae	Linyphiidae	Linyphia triangularis	female	adult	Germany	Bayern	OA. Memhölz	10.26	47.66	06.08.2012	Holstein. J.; Leidenroth	Holstein. J.	ethanol 100%	SMNSAran741
SMNS-Aran-743	Araneae	Tetragnathidae	Metellina segmentata	male	subadult	Germany	Bayern	OA. Memhölz	10.26	47.66	06.08.2012	Holstein. J.; Leidenroth	Holstein. J.	ethanol 100%	SMNSAran743
SMNS-Aran-745	Araneae	Pisauridae	Pisaura mirabilis	female	juvenile	Germany	Bayern	OA. Memhölz	10.26	47.66	06.08.2012	Holstein. J.; Leidenroth	Holstein. J.	ethanol 100%	SMNSAran745
SMNS-Aran-748	Araneae	Lycosidae	Pardosa lugubris	female	adult	Germany	Bayern	OA. Memhölz	10.26	47.66	06.08.2012	Holstein. J.; Leidenroth	Holstein. J.	ethanol 100%	SMNSAran748
SMNS-Aran-749	Araneae	Linyphiidae	Linyphia triangularis	male	adult	Germany	Bayern	OA. Memhölz	10.26	47.66	06.08.2012	Holstein. J.; Leidenroth	Holstein. J.	ethanol 100%	SMNSAran749
SMNS-Aran-750	Araneae	Linyphiidae	Linyphia triangularis	female	subadult	Germany	Bayern	OA. Memhölz	10.26	47.66	06.08.2012	Holstein. J.; Leidenroth	Holstein. J.	ethanol 100%	SMNSAran750
SMNS-Aran-752	Araneae	Lycosidae	Xerolycosa nemoralis	female	adult	Germany	Bayern	OA. Memhölz	10.26	47.66	06.08.2012	Holstein. J.; Leidenroth	Holstein. J.	ethanol 100%	SMNSAran752
SMNS-Aran-754	Araneae	Linyphiidae	Linyphia triangularis	female	adult	Germany	Bayern	OA. Hellengerst	10.22	47.66	06.08.2012	Holstein. J.; Leidenroth	Holstein. J.	ethanol 100%	SMNSAran754
SMNS-Aran-756	Araneae	Araneidae	Araneus quadratus	female	adult	Germany	Bayern	OA. Hellengerst	10.22	47.66	06.08.2012	Holstein. J.; Leidenroth	Holstein. J.	ethanol 100%	SMNSAran756
SMNS-Aran-757	Araneae	Araneidae	Araneus quadratus	female	adult	Germany	Bayern	OA. Hellengerst	10.22	47.66	06.08.2012	Holstein. J.; Leidenroth	Holstein. J.	ethanol 100%	SMNSAran757
SMNS-Aran-759	Araneae	Pisauridae	Dolomedes fimbriatus	female	subadult	Germany	Bayern	OA. Hellengerst	10.22	47.66	06.08.2012	Holstein. J.; Leidenroth	Holstein. J.	ethanol 100%	SMNSAran759
SMNS-Aran-760	Araneae	Thomisidae	Misumena vatia	female	adult	Germany	Bayern	OA. Hellengerst	10.22	47.66	06.08.2012	Holstein. J.; Leidenroth	Holstein. J.	ethanol 100%	SMNSAran760
SMNS-Aran-762	Araneae	Araneidae	Araneus quadratus	male	adult	Germany	Bayern	OA. Hellengerst	10.22	47.66	06.08.2012	Holstein. J.; Leidenroth	Holstein. J.	ethanol 100%	SMNSAran762
SMNS-Aran-765	Araneae	Salticidae	Evarcha falcata	male	adult	Germany	Bayern	OA. Hellengerst	10.22	47.66	06.08.2012	Holstein. J.; Leidenroth	Holstein. J.	ethanol 100%	SMNSAran765
SMNS-Aran-771	Araneae	Tetragnathidae	Tetragnatha nigrita	male	adult	Germany	Baden-Württemberg	RV. Bad Wurzach-Rohr	9.84	47.88	07.08.2012	Holstein. J.; Leidenroth	Holstein. J.	ethanol 100%	SMNSAran771
SMNS-Aran-779	Araneae	Araneidae	Araneus marmoreus	female	adult	Germany	Baden-Württemberg	RV. Bad Wurzach	9.88	47.91	07.08.2012	Holstein. J.; Leidenroth	Holstein. J.	ethanol 100%	SMNSAran779
SMNS-Aran-780	Araneae	Araneidae	Aculepeira ceropegia	female	adult	Germany	Baden-Württemberg	RV. Bad Wurzach	9.88	47.91	07.08.2012	Holstein. J.; Leidenroth	Holstein. J.	ethanol 100%	SMNSAran780
SMNS-Aran-783	Araneae	Linyphiidae	Linyphia triangularis	male	adult	Germany	Baden-Württemberg	RV. Bad Wurzach	9.88	47.91	07.08.2012	Holstein. J.; Leidenroth	Holstein. J.	ethanol 100%	SMNSAran783
SMNS-Aran-787	Araneae	Araneidae	Araneus diadematus	female	adult	Germany	Baden-Württemberg	BC. Bad Buchau	9.6	48.07	07.08.2012	Holstein. J.; Leidenroth	Holstein. J.	ethanol 100%	SMNSAran787
SMNS-Aran-788	Araneae	Araneidae	Araneus quadratus	female	adult	Germany	Baden-Württemberg	BC. Bad Buchau	9.6	48.07	07.08.2012	Holstein. J.; Leidenroth	Holstein. J.	ethanol 100%	SMNSAran788
SMNS-Aran-789	Araneae	Araneidae	Araneus quadratus	male	adult	Germany	Baden-Württemberg	BC. Bad Buchau	9.6	48.07	07.08.2012	Holstein. J.; Leidenroth	Holstein. J.	ethanol 100%	SMNSAran789
SMNS-Aran-792	Araneae	Araneidae	Araneus diadematus	female	adult	Germany	Baden-Württemberg	GP. Wiesensteig	9.6	48.56	22.08.2012	Holstein. J.	Holstein. J.	ethanol 100%	SMNSAran792
SMNS-Aran-793	Araneae	Araneidae	Araneus quadratus	female	adult	Germany	Baden-Württemberg	GP. Wiesensteig	9.6	48.56	22.08.2012	Holstein. J.	Holstein. J.	ethanol 100%	SMNSAran793
SMNS-Aran-794	Araneae	Araneidae	Araneus quadratus	female	adult	Germany	Baden-Württemberg	GP. Wiesensteig	9.6	48.56	22.08.2012	Holstein. J.	Holstein. J.	ethanol 100%	SMNSAran794
SMNS-Aran-795	Araneae	Araneidae	Araneus quadratus	male	adult	Germany	Baden-Württemberg	GP. Wiesensteig	9.6	48.56	22.08.2012	Holstein. J.	Holstein. J.	ethanol 100%	SMNSAran795
SMNS-Aran-796	Araneae	Araneidae	Araneus quadratus	male	adult	Germany	Baden-Württemberg	GP. Wiesensteig	9.6	48.56	22.08.2012	Holstein. J.	Holstein. J.	ethanol 100%	SMNSAran796
SMNS-Aran-797	Araneae	Araneidae	Araneus quadratus	male	adult	Germany	Baden-Württemberg	GP. Wiesensteig	9.6	48.56	22.08.2012	Holstein. J.	Holstein. J.	ethanol 100%	SMNSAran797
SMNS-Aran-798	Araneae	Tetragnathidae	Metellina segmentata	male	adult	Germany	Baden-Württemberg	GP. Wiesensteig	9.6	48.56	22.08.2012	Holstein. J.	Holstein. J.	ethanol 100%	SMNSAran798
SMNS-Aran-799	Araneae	Lycosidae	Pardosa amentata	female	adult	Germany	Baden-Württemberg	GP. Wiesensteig	9.6	48.56	22.08.2012	Holstein. J.	Holstein. J.	ethanol 100%	SMNSAran799
SMNS-Aran-800	Araneae	Salticidae	Evarcha arcuata	female	adult	Germany	Baden-Württemberg	GP. Wiesensteig	9.6	48.56	22.08.2012	Holstein. J.	Holstein. J.	ethanol 100%	SMNSAran800
SMNS-Aran-801	Araneae	Tetragnathidae	Metellina segmentata	female	adult	Germany	Baden-Württemberg	GP. Wiesensteig	9.6	48.56	22.08.2012	Holstein. J.	Holstein. J.	ethanol 100%	SMNSAran801
SMNS-Aran-802	Araneae	Thomisidae	Xysticus bifasciatus	female	subadult	Germany	Baden-Württemberg	GP. Wiesensteig	9.6	48.56	22.08.2012	Holstein. J.	Holstein. J.	ethanol 100%	SMNSAran802
SMNS-Aran-803	Araneae	Linyphiidae	Linyphia triangularis	female	adult	Germany	Baden-Württemberg	GP. Wiesensteig	9.6	48.56	22.08.2012	Holstein. J.	Holstein. J.	ethanol 100%	SMNSAran803
SMNS-Aran-805	Araneae	Tetragnathidae	Pachygnatha listeri	female	adult	Germany	Baden-Württemberg	GP. Wiesensteig	9.6	48.56	22.08.2012	Holstein. J.	Holstein. J.	ethanol 100%	SMNSAran805
SMNS-Aran-806	Araneae	Salticidae	Heliophanus flavipes	female	adult	Germany	Baden-Württemberg	GP. Unterböhringen	9.74	48.62	22.08.2012	Holstein. J.	Holstein. J.	ethanol 100%	SMNSAran806
SMNS-Aran-808	Araneae	Tetragnathidae	Metellina segmentata	female	adult	Germany	Baden-Württemberg	GP. Unterböhringen	9.74	48.62	22.08.2012	Holstein. J.	Holstein. J.	ethanol 100%	SMNSAran808
SMNS-Aran-810	Araneae	Gnaphosidae	Gnaphosa lucifuga	female	adult	Germany	Baden-Württemberg	GP. Unterböhringen	9.74	48.62	22.08.2012	Holstein. J.	Holstein. J.	ethanol 100%	SMNSAran810
SMNS-Aran-811	Araneae	Salticidae	Pellenes tripunctatus	female	subadult	Germany	Baden-Württemberg	GP. Unterböhringen	9.74	48.62	22.08.2012	Holstein. J.	Holstein. J.	ethanol 100%	SMNSAran811
SMNS-Aran-812	Araneae	Sparassidae	Micrommata virescens	female	subadult	Germany	Baden-Württemberg	WN. Aspach	9.42	49	15.04.2013	Holstein. J.	Holstein. J.	ethanol 100%	SMNSAran812
SMNS-Aran-814	Araneae	Salticidae	Aelurillus v-insignitus	male	adult	Germany	Baden-Württemberg	HD. Sandhausen	8.64	49.35	25.04.2013	Holstein. J.	Holstein. J.	ethanol 100%	SMNSAran814
SMNS-Aran-818	Araneae	Salticidae	Leptorchestes berolinensis	male	adult	Germany	Baden-Württemberg	HD. Sandhausen	8.64	49.35	25.04.2013	Holstein. J.	Holstein. J.	ethanol 100%	SMNSAran818
SMNS-Aran-819	Araneae	Theridiidae	Steatoda albomaculata	female	subadult	Germany	Baden-Württemberg	HD. Sandhausen	8.64	49.35	25.04.2013	Holstein. J.	Holstein. J.	ethanol 100%	SMNSAran819
SMNS-Aran-820	Araneae	Thomisidae	Xysticus kochi	male	adult	Germany	Baden-Württemberg	HD. Sandhausen	8.64	49.35	25.04.2013	Holstein. J.	Holstein. J.	ethanol 100%	SMNSAran820
SMNS-Aran-822	Araneae	Pisauridae	Pisaura mirabilis	female	subadult	Germany	Baden-Württemberg	HD. Sandhausen	8.64	49.35	25.04.2013	Holstein. J.	Holstein. J.	ethanol 100%	SMNSAran822
SMNS-Aran-823	Araneae	Lycosidae	Pardosa lugubris	male	adult	Germany	Baden-Württemberg	HD. Sandhausen	8.64	49.35	25.04.2013	Holstein. J.	Holstein. J.	ethanol 100%	SMNSAran823
SMNS-Aran-824	Araneae	Lycosidae	Aulonia albimana	female	adult	Germany	Baden-Württemberg	HD. Sandhausen	8.64	49.35	25.04.2013	Holstein. J.	Holstein. J.	ethanol 100%	SMNSAran824
SMNS-Aran-825	Araneae	Salticidae	Aelurillus v-insignitus	male	adult	Germany	Baden-Württemberg	HD. Sandhausen	8.64	49.35	25.04.2013	Holstein. J.	Holstein. J.	ethanol 100%	SMNSAran825
SMNS-Aran-826	Araneae	Lycosidae	Pardosa lugubris	female	subadult	Germany	Baden-Württemberg	HD. Sandhausen	8.64	49.35	25.04.2013	Holstein. J.	Holstein. J.	ethanol 100%	SMNSAran826
SMNS-Aran-827	Araneae	Gnaphosidae	Zelotes petrensis	female	adult	Germany	Baden-Württemberg	HD. Sandhausen	8.64	49.35	25.04.2013	Holstein. J.	Holstein. J.	ethanol 100%	SMNSAran827
SMNS-Aran-828	Araneae	Lycosidae	Pardosa hortensis	female	subadult	Germany	Baden-Württemberg	HD. Sandhausen	8.64	49.35	25.04.2013	Holstein. J.	Holstein. J.	ethanol 100%	SMNSAran828
SMNS-Aran-829	Araneae	Thomisidae	Xysticus kochi	male	adult	Germany	Baden-Württemberg	HD. Sandhausen	8.64	49.35	25.04.2013	Holstein. J.	Holstein. J.	ethanol 100%	SMNSAran829
SMNS-Aran-830	Araneae	Thomisidae	Xysticus kochi	female	adult	Germany	Baden-Württemberg	HD. Sandhausen	8.64	49.35	25.04.2013	Holstein. J.	Holstein. J.	ethanol 100%	SMNSAran830
SMNS-Aran-831	Araneae	Thomisidae	Xysticus audax	female	adult	Germany	Baden-Württemberg	HD. Sandhausen	8.64	49.35	25.04.2013	Holstein. J.	Holstein. J.	ethanol 100%	SMNSAran831
SMNS-Aran-832	Araneae	Thomisidae	Xysticus acerbus	male	adult	Germany	Baden-Württemberg	HD. Sandhausen	8.64	49.35	25.04.2013	Holstein. J.	Holstein. J.	ethanol 100%	SMNSAran832
SMNS-Aran-833	Araneae	Theridiidae	Steatoda albomaculata	female	adult	Germany	Baden-Württemberg	HD. Sandhausen	8.64	49.35	25.04.2013	Holstein. J.	Holstein. J.	ethanol 100%	SMNSAran833
SMNS-Aran-840	Araneae	Lycosidae	Pardosa lugubris	male	adult	Germany	Baden-Württemberg	HD. Sandhausen	8.64	49.35	25.04.2013	Holstein. J.	Holstein. J.	ethanol 100%	SMNSAran840
SMNS-Aran-842	Araneae	Linyphiidae	Linyphia hortensis	female	adult	Germany	Baden-Württemberg	HD. Sandhausen	8.64	49.35	25.04.2013	Holstein. J.	Holstein. J.	ethanol 100%	SMNSAran842
SMNS-Aran-843	Araneae	Philodromidae	Philodromus dispar	male	adult	Germany	Baden-Württemberg	GP. Gingen	9.78	48.66	08.05.2013	Holstein. J.	Holstein. J.	ethanol 100%	SMNSAran843
SMNS-Aran-850	Araneae	Linyphiidae	Tenuiphantes tenebricola	male	adult	Germany	Baden-Württemberg	AA. Heubach	9.94	48.79	08.05.2013	Holstein. J.	Holstein. J.	ethanol 100%	SMNSAran850
SMNS-Aran-851	Araneae	Linyphiidae	Moebelia penicillata	female	adult	Germany	Baden-Württemberg	AA. Heubach	9.94	48.79	08.05.2013	Holstein. J.	Holstein. J.	ethanol 100%	SMNSAran851
SMNS-Aran-852	Araneae	Linyphiidae	Linyphia hortensis	male	adult	Germany	Baden-Württemberg	AA. Heubach	9.94	48.79	08.05.2013	Holstein. J.	Holstein. J.	ethanol 100%	SMNSAran852
SMNS-Aran-853	Araneae	Agelenidae	Coelotes terrestris	female	adult	Germany	Baden-Württemberg	AA. Heubach	9.94	48.79	08.05.2013	Holstein. J.	Holstein. J.	ethanol 100%	SMNSAran853
SMNS-Aran-854	Araneae	Lycosidae	Pardosa lugubris	male	adult	Germany	Baden-Württemberg	AA. Heubach	9.94	48.79	08.05.2013	Holstein. J.	Holstein. J.	ethanol 100%	SMNSAran854
SMNS-Aran-855	Araneae	Lycosidae	Pardosa lugubris	female	adult	Germany	Baden-Württemberg	AA. Heubach	9.94	48.79	08.05.2013	Holstein. J.	Holstein. J.	ethanol 100%	SMNSAran855
SMNS-Aran-856	Araneae	Lycosidae	Pardosa lugubris	male	adult	Germany	Baden-Württemberg	AA. Heubach	9.94	48.79	08.05.2013	Holstein. J.	Holstein. J.	ethanol 100%	SMNSAran856
SMNS-Aran-857	Araneae	Tetragnathidae	Meta menardi	female	adult	Germany	Baden-Württemberg	AA. Heubach	9.94	48.79	08.05.2013	Holstein. J.	Holstein. J.	ethanol 100%	SMNSAran857
SMNS-Aran-860	Araneae	Lycosidae	Pardosa lugubris	male	adult	Germany	Baden-Württemberg	AA. Heubach	9.94	48.79	08.05.2013	Holstein. J.	Holstein. J.	ethanol 100%	SMNSAran860
SMNS-Aran-861	Araneae	Lycosidae	Pardosa lugubris	male	adult	Germany	Baden-Württemberg	AA. Heubach	9.94	48.79	08.05.2013	Holstein. J.	Holstein. J.	ethanol 100%	SMNSAran861
SMNS-Aran-862	Araneae	Lycosidae	Pardosa lugubris	female	adult	Germany	Baden-Württemberg	AA. Heubach	9.94	48.79	08.05.2013	Holstein. J.	Holstein. J.	ethanol 100%	SMNSAran862
SMNS-Aran-863	Araneae	Lycosidae	Pardosa lugubris	female	adult	Germany	Baden-Württemberg	AA. Heubach	9.94	48.79	08.05.2013	Holstein. J.	Holstein. J.	ethanol 100%	SMNSAran863
SMNS-Aran-864	Araneae	Salticidae	Pseudeuophrys erratica	male	adult	Germany	Baden-Württemberg	AA. Heubach	9.94	48.79	08.05.2013	Holstein. J.	Holstein. J.	ethanol 100%	SMNSAran864
SMNS-Aran-865	Araneae	Linyphiidae	Linyphia hortensis	male	adult	Germany	Baden-Württemberg	AA. Heubach	9.94	48.79	08.05.2013	Holstein. J.	Holstein. J.	ethanol 100%	SMNSAran865
SMNS-Aran-866	Araneae	Linyphiidae	Linyphia hortensis	female	adult	Germany	Baden-Württemberg	AA. Heubach	9.94	48.79	08.05.2013	Holstein. J.	Holstein. J.	ethanol 100%	SMNSAran866
SMNS-Aran-867	Araneae	Linyphiidae	Linyphia hortensis	female	adult	Germany	Baden-Württemberg	AA. Heubach	9.94	48.79	08.05.2013	Holstein. J.	Holstein. J.	ethanol 100%	SMNSAran867
SMNS-Aran-868	Araneae	Linyphiidae	Linyphia hortensis	male	adult	Germany	Baden-Württemberg	AA. Heubach	9.94	48.79	08.05.2013	Holstein. J.	Holstein. J.	ethanol 100%	SMNSAran868
SMNS-Aran-869	Araneae	Tetragnathidae	Metellina mengei	male	subadult	Germany	Baden-Württemberg	AA. Heubach	9.94	48.79	08.05.2013	Holstein. J.	Holstein. J.	ethanol 100%	SMNSAran869
SMNS-Aran-871	Araneae	Araneidae	Larinioides cornutus	female	adult	Germany	Baden-Württemberg	AA. Weiler i.d.B.	9.87	48.75	15.05.2013	Kothe. T.; Wendt. I.	Holstein. J.	ethanol 100%	SMNSAran871
SMNS-Aran-873	Araneae	Lycosidae	Pardosa lugubris	female	adult	Germany	Baden-Württemberg	UL. Blaustein	9.85	48.41	03.06.2013	Holstein. J.; Leidenroth	Holstein. J.	ethanol 100%	SMNSAran873
SMNS-Aran-874	Araneae	Lycosidae	Pardosa lugubris	male	adult	Germany	Baden-Württemberg	UL. Blaustein	9.85	48.41	03.06.2013	Holstein. J.; Leidenroth	Holstein. J.	ethanol 100%	SMNSAran874
SMNS-Aran-875	Araneae	Lycosidae	Pardosa riparia	male	adult	Germany	Baden-Württemberg	UL. Blaustein	9.85	48.41	03.06.2013	Holstein. J.; Leidenroth	Holstein. J.	ethanol 100%	SMNSAran875
SMNS-Aran-876	Araneae	Dysderidae	Dysdera erythrina	female	adult	Germany	Baden-Württemberg	UL. Blaustein	9.85	48.41	03.06.2013	Holstein. J.; Leidenroth	Holstein. J.	ethanol 100%	SMNSAran876
SMNS-Aran-877	Araneae	Pisauridae	Pisaura mirabilis	female	adult	Germany	Baden-Württemberg	UL. Blaustein	9.85	48.41	03.06.2013	Holstein. J.; Leidenroth	Holstein. J.	ethanol 100%	SMNSAran877
SMNS-Aran-878	Araneae	Araneidae	Aculepeira ceropegia	female	adult	Germany	Baden-Württemberg	UL. Gerhausen	9.82	48.4	03.06.2013	Holstein. J.; Leidenroth	Holstein. J.	ethanol 100%	SMNSAran878
SMNS-Aran-880	Araneae	Titanoecidae	Titanoeca quadriguttata	male	subadult	Germany	Baden-Württemberg	UL. Gerhausen	9.82	48.4	03.06.2013	Holstein. J.; Leidenroth	Holstein. J.	ethanol 100%	SMNSAran880
SMNS-Aran-881	Araneae	Titanoecidae	Titanoeca quadriguttata	male	subadult	Germany	Baden-Württemberg	UL. Gerhausen	9.82	48.4	03.06.2013	Holstein. J.; Leidenroth	Holstein. J.	ethanol 100%	SMNSAran881
SMNS-Aran-882	Araneae	Titanoecidae	Titanoeca quadriguttata	female	adult	Germany	Baden-Württemberg	UL. Gerhausen	9.82	48.4	03.06.2013	Holstein. J.; Leidenroth	Holstein. J.	ethanol 100%	SMNSAran882
SMNS-Aran-883	Araneae	Titanoecidae	Titanoeca quadriguttata	male	subadult	Germany	Baden-Württemberg	UL. Gerhausen	9.82	48.4	03.06.2013	Holstein. J.; Leidenroth	Holstein. J.	ethanol 100%	SMNSAran883
SMNS-Aran-885	Araneae	Theridiidae	Asagena phalerata	female	adult	Germany	Baden-Württemberg	UL. Bermaringen	9.84	48.45	03.06.2013	Holstein. J.; Leidenroth	Holstein. J.	ethanol 100%	SMNSAran885
SMNS-Aran-886	Araneae	Lycosidae	Pardosa lugubris	male	adult	Germany	Baden-Württemberg	UL. Bermaringen	9.84	48.45	03.06.2013	Holstein. J.; Leidenroth	Holstein. J.	ethanol 100%	SMNSAran886
SMNS-Aran-887	Araneae	Lycosidae	Pardosa lugubris	male	adult	Germany	Baden-Württemberg	UL. Bermaringen	9.84	48.45	03.06.2013	Holstein. J.; Leidenroth	Holstein. J.	ethanol 100%	SMNSAran887
SMNS-Aran-888	Araneae	Lycosidae	Xerolycosa nemoralis	male	subadult	Germany	Baden-Württemberg	UL. Bermaringen	9.84	48.45	03.06.2013	Holstein. J.; Leidenroth	Holstein. J.	ethanol 100%	SMNSAran888
SMNS-Aran-889	Araneae	Lycosidae	Xerolycosa nemoralis	female	subadult	Germany	Baden-Württemberg	UL. Bermaringen	9.84	48.45	03.06.2013	Holstein. J.; Leidenroth	Holstein. J.	ethanol 100%	SMNSAran889
SMNS-Aran-890	Araneae	Gnaphosidae	Gnaphosa lucifuga	female	adult	Germany	Baden-Württemberg	UL. Bermaringen	9.84	48.45	03.06.2013	Holstein. J.; Leidenroth	Holstein. J.	ethanol 100%	SMNSAran890
SMNS-Aran-892	Araneae	Gnaphosidae	Drassodes lapidosus	female	juvenile	Germany	Baden-Württemberg	UL. Lautern	9.88	48.44	03.06.2013	Holstein. J.; Leidenroth	Holstein. J.	ethanol 100%	SMNSAran892
SMNS-Aran-893	Araneae	Gnaphosidae	Drassodes lapidosus	male	adult	Germany	Baden-Württemberg	UL. Lautern	9.88	48.44	03.06.2013	Holstein. J.; Leidenroth	Holstein. J.	ethanol 100%	SMNSAran893
SMNS-Aran-894	Araneae	Gnaphosidae	Drassodes lapidosus	male	adult	Germany	Baden-Württemberg	UL. Lautern	9.88	48.44	03.06.2013	Holstein. J.; Leidenroth	Holstein. J.	ethanol 100%	SMNSAran894
SMNS-Aran-895	Araneae	Gnaphosidae	Drassodes lapidosus	female	subadult	Germany	Baden-Württemberg	UL. Lautern	9.88	48.44	03.06.2013	Holstein. J.; Leidenroth	Holstein. J.	ethanol 100%	SMNSAran895
SMNS-Aran-896	Araneae	Gnaphosidae	Gnaphosa lucifuga	female	subadult	Germany	Baden-Württemberg	UL. Lautern	9.88	48.44	03.06.2013	Holstein. J.; Leidenroth	Holstein. J.	ethanol 100%	SMNSAran896
SMNS-Aran-897	Araneae	Lycosidae	Pardosa bifasciata	male	subadult	Germany	Baden-Württemberg	UL. Lautern	9.88	48.44	03.06.2013	Holstein. J.; Leidenroth	Holstein. J.	ethanol 100%	SMNSAran897
SMNS-Aran-899	Araneae	Linyphiidae	Frontinellina frutetorum	female	adult	Germany	Baden-Württemberg	UL. Lautern	9.88	48.44	03.06.2013	Holstein. J.; Leidenroth	Holstein. J.	ethanol 100%	SMNSAran899
SMNS-Aran-901	Araneae	Lycosidae	Pardosa bifasciata	female	subadult	Germany	Baden-Württemberg	UL. Lautern	9.88	48.44	03.06.2013	Holstein. J.; Leidenroth	Holstein. J.	ethanol 100%	SMNSAran901
SMNS-Aran-902	Araneae	Titanoecidae	Titanoeca quadriguttata	female	adult	Germany	Baden-Württemberg	UL. Lautern	9.88	48.44	03.06.2013	Holstein. J.; Leidenroth	Holstein. J.	ethanol 100%	SMNSAran902
SMNS-Aran-903	Araneae	Titanoecidae	Titanoeca quadriguttata	male	subadult	Germany	Baden-Württemberg	UL. Lautern	9.88	48.44	03.06.2013	Holstein. J.; Leidenroth	Holstein. J.	ethanol 100%	SMNSAran903
SMNS-Aran-904	Araneae	Titanoecidae	Titanoeca quadriguttata	female	subadult	Germany	Baden-Württemberg	UL. Lautern	9.88	48.44	03.06.2013	Holstein. J.; Leidenroth	Holstein. J.	ethanol 100%	SMNSAran904
SMNS-Aran-905	Araneae	Linyphiidae	Frontinellina frutetorum	female	adult	Germany	Baden-Württemberg	UL. Lautern	9.88	48.44	03.06.2013	Holstein. J.; Leidenroth	Holstein. J.	ethanol 100%	SMNSAran905
SMNS-Aran-906	Araneae	Linyphiidae	Frontinellina frutetorum	male	adult	Germany	Baden-Württemberg	UL. Lautern	9.88	48.44	03.06.2013	Holstein. J.; Leidenroth	Holstein. J.	ethanol 100%	SMNSAran906
SMNS-Aran-907	Araneae	Titanoecidae	Titanoeca quadriguttata	male	subadult	Germany	Baden-Württemberg	UL. Lautern	9.88	48.44	03.06.2013	Holstein. J.; Leidenroth	Holstein. J.	ethanol 100%	SMNSAran907
SMNS-Aran-908	Araneae	Titanoecidae	Titanoeca quadriguttata	male	subadult	Germany	Baden-Württemberg	UL. Lautern	9.88	48.44	03.06.2013	Holstein. J.; Leidenroth	Holstein. J.	ethanol 100%	SMNSAran908
SMNS-Aran-909	Araneae	Araneidae	Mangora acalypha	female	juvenile	Germany	Baden-Württemberg	UL. Lautern	9.88	48.44	03.06.2013	Holstein. J.; Leidenroth	Holstein. J.	ethanol 100%	SMNSAran909
SMNS-Aran-910	Araneae	Salticidae	Heliophanus cupreus	female	adult	Germany	Baden-Württemberg	GP. Geislingen; Steige	9.84	48.63	17.06.2013	Holstein. J.	Holstein. J.	ethanol 100%	SMNSAran910
SMNS-Aran-911	Araneae	Dictynidae	Archaeodictyna ammophila	male	adult	Italy	Toscana	nördl. Sansepolcro	12.13	43.6	29.05.2013	Wendt. I.	Holstein. J.	ethanol 100%	SMNSAran911
SMNS-Aran-912	Araneae	Salticidae	Heliophanus cupreus	female	adult	Italy	Toscana	nördl. Sansepolcro	12.13	43.6	29.05.2013	Wendt. I.	Holstein. J.	ethanol 100%	SMNSAran912
SMNS-Aran-913	Araneae	Uloboridae	Uloborus walckenaerius	female	adult	Italy	Toscana	nördl. Sansepolcro	12.13	43.6	29.05.2013	Wendt. I.	Holstein. J.	ethanol 100%	SMNSAran913
SMNS-Aran-914	Araneae	Theridiidae	Steatoda triangulosa	female	adult	Italy	Toscana	nördl. Sansepolcro	12.13	43.6	29.05.2013	Wendt. I.	Holstein. J.	ethanol 100%	SMNSAran914
SMNS-Aran-916	Araneae	Pimoidae	Pimoa breuili	male	adult	Italy	Toscana	nördl. Sansepolcro	12.13	43.6	29.05.2013	Wendt. I.	Holstein. J.	ethanol 100%	SMNSAran916
SMNS-Aran-918	Araneae	Oxyopidae	Oxyopes heterophthalmus	female	adult	Italy	Toscana	nördl. Sansepolcro	12.13	43.6	29.05.2013	Wendt. I.	Holstein. J.	ethanol 100%	SMNSAran918
SMNS-Aran-919	Araneae	Philodromidae	Philodromus albidus	male	adult	Germany	Baden-Württemberg	S. Hohenheim	9.21	48.71	15.06.2013	Wendt. I.; Holstein. J.	Holstein. J.	ethanol 100%	SMNSAran919
SMNS-Aran-920	Araneae	Thomisidae	Xysticus kochi	female	adult	Germany	Baden-Württemberg	S. Hohenheim	9.21	48.71	15.06.2013	Wendt. I.; Holstein. J.	Holstein. J.	ethanol 100%	SMNSAran920
SMNS-Aran-921	Araneae	Lycosidae	Pardosa hortensis	female	adult	Germany	Baden-Württemberg	S. Hohenheim	9.21	48.71	15.06.2013	Wendt. I.; Holstein. J.	Holstein. J.	ethanol 100%	SMNSAran921
SMNS-Aran-922	Araneae	Gnaphosidae	Trachyzelotes pedestris	male	adult	Germany	Baden-Württemberg	S. Hohenheim	9.21	48.71	15.06.2013	Wendt. I.; Holstein. J.	Holstein. J.	ethanol 100%	SMNSAran922
SMNS-Aran-924	Araneae	Theridiidae	Steatoda bipunctata	female	adult	Germany	Baden-Württemberg	S. Hohenheim	9.21	48.71	15.06.2013	Wendt. I.; Holstein. J.	Holstein. J.	ethanol 100%	SMNSAran924
SMNS-Aran-925	Araneae	Philodromidae	Philodromus dispar	female	adult	Germany	Baden-Württemberg	S. Hohenheim	9.21	48.71	15.06.2013	Wendt. I.; Holstein. J.	Holstein. J.	ethanol 100%	SMNSAran925
SMNS-Aran-926	Araneae	Tetragnathidae	Tetragnatha nigrita	male	adult	Germany	Baden-Württemberg	S. Hohenheim	9.21	48.71	15.06.2013	Wendt. I.; Holstein. J.	Holstein. J.	ethanol 100%	SMNSAran926
SMNS-Aran-927	Araneae	Agelenidae	Coelotes terrestris	female	juvenile	Germany	Baden-Württemberg	S. Hohenheim	9.21	48.71	15.06.2013	Wendt. I.; Holstein. J.	Holstein. J.	ethanol 100%	SMNSAran927
SMNS-Aran-930	Araneae	Agelenidae	Eratigena atrica	female	juvenile	Germany	Baden-Württemberg	S. Hohenheim	9.21	48.71	15.06.2013	Wendt. I.; Holstein. J.	Holstein. J.	ethanol 100%	SMNSAran930
SMNS-Aran-931	Araneae	Amaurobiidae	Amaurobius ferox	female	adult	Germany	Baden-Württemberg	S. Hohenheim	9.21	48.71	15.06.2013	Wendt. I.; Holstein. J.	Holstein. J.	ethanol 100%	SMNSAran931
SMNS-Aran-934	Araneae	Theridiidae	Dipoena melanogaster	female	adult	Germany	Baden-Württemberg	S. Hohenheim	9.21	48.71	15.06.2013	Wendt. I.; Holstein. J.	Holstein. J.	ethanol 100%	SMNSAran934
SMNS-Aran-937	Araneae	Linyphiidae	Entelecara acuminata	female	adult	Germany	Baden-Württemberg	S. Hohenheim	9.21	48.71	15.06.2013	Wendt. I.; Holstein. J.	Holstein. J.	ethanol 100%	SMNSAran937
SMNS-Aran-940	Araneae	Thomisidae	Ozyptila praticola	male	adult	Germany	Baden-Württemberg	S. Hohenheim	9.21	48.71	15.06.2013	Wendt. I.; Holstein. J.	Holstein. J.	ethanol 100%	SMNSAran940
SMNS-Aran-943	Araneae	Salticidae	Euophrys frontalis	male	subadult	Germany	Baden-Württemberg	S. Hohenheim	9.21	48.71	15.06.2013	Wendt. I.; Holstein. J.	Holstein. J.	ethanol 100%	SMNSAran943
SMNS-Aran-944	Araneae	Linyphiidae	Entelecara acuminata	female	adult	Germany	Baden-Württemberg	S. Hohenheim	9.21	48.71	15.06.2013	Wendt. I.; Holstein. J.	Holstein. J.	ethanol 100%	SMNSAran944
SMNS-Aran-945	Araneae	Linyphiidae	Lepthyphantes minutus	female	juvenile	Germany	Baden-Württemberg	S. Hohenheim	9.21	48.71	15.06.2013	Wendt. I.; Holstein. J.	Holstein. J.	ethanol 100%	SMNSAran945
SMNS-Aran-946	Araneae	Theridiidae	Enoplognatha ovata	male	adult	Germany	Baden-Württemberg	S. Hohenheim	9.21	48.71	15.06.2013	Wendt. I.; Holstein. J.	Holstein. J.	ethanol 100%	SMNSAran946
SMNS-Aran-949	Araneae	Lycosidae	Piratula latitans	female	adult	Germany	Baden-Württemberg	S. Hohenheim	9.21	48.71	15.06.2013	Wendt. I.; Holstein. J.	Holstein. J.	ethanol 100%	SMNSAran949
SMNS-Aran-950	Araneae	Theridiidae	Neottiura suaveolens	male	adult	Germany	Baden-Württemberg	FR. Vogtsburg-Schelingen	7.68	48.1	17.06.2013	Krogmann. L.; Kothe. T.	Holstein. J.	ethanol 100%	SMNSAran950
SMNS-Aran-951	Araneae	Theridiidae	Neottiura suaveolens	male	adult	Germany	Baden-Württemberg	FR. Vogtsburg-Schelingen	7.68	48.1	17.06.2013	Krogmann. L.; Kothe. T.	Holstein. J.	ethanol 100%	SMNSAran951
SMNS-Aran-952	Araneae	Salticidae	Evarcha falcata	male	adult	Germany	Baden-Württemberg	FR. Vogtsburg-Schelingen	7.68	48.1	17.06.2013	Krogmann. L.; Kothe. T.	Holstein. J.	ethanol 100%	SMNSAran952
SMNS-Aran-955	Araneae	Araneidae	Mangora acalypha	female	adult	Germany	Baden-Württemberg	FR. Vogtsburg-Schelingen	7.68	48.1	17.06.2013	Krogmann. L.; Kothe. T.	Holstein. J.	ethanol 100%	SMNSAran955
SMNS-Aran-956	Araneae	Araneidae	Agalenatea redii	female	adult	Germany	Baden-Württemberg	FR. Vogtsburg-Schelingen	7.68	48.1	17.06.2013	Krogmann. L.; Kothe. T.	Holstein. J.	ethanol 100%	SMNSAran956
SMNS-Aran-957	Araneae	Thomisidae	Heriaeus graminicola	female	adult	Germany	Baden-Württemberg	FR. Vogtsburg-Schelingen	7.68	48.1	17.06.2013	Krogmann. L.; Kothe. T.	Holstein. J.	ethanol 100%	SMNSAran957
SMNS-Aran-958	Araneae	Araneidae	Larinioides cornutus	female	adult	Germany	Baden-Württemberg	FR. Vogtsburg-Schelingen	7.68	48.1	17.06.2013	Krogmann. L.; Kothe. T.	Holstein. J.	ethanol 100%	SMNSAran958
SMNS-Aran-959	Araneae	Gnaphosidae	Scotophaeus scutulatus	female	adult	Germany	Baden-Württemberg	FR. Vogtsburg-Schelingen	7.68	48.1	17.06.2013	Krogmann. L.; Kothe. T.	Holstein. J.	ethanol 100%	SMNSAran959
SMNS-Aran-960	Araneae	Thomisidae	Xysticus erraticus	female	adult	Germany	Baden-Württemberg	FR. Vogtsburg-Schelingen	7.68	48.1	17.06.2013	Krogmann. L.; Kothe. T.	Holstein. J.	ethanol 100%	SMNSAran960
SMNS-Aran-961	Araneae	Tetragnathidae	Tetragnatha pinicola	female	subadult	Germany	Baden-Württemberg	WN. Winterbach	9.5	48.79	22.06.2013	Wendt. I.	Holstein. J.	ethanol 100%	SMNSAran961
SMNS-Aran-962	Araneae	Salticidae	Dendryphantes rudis	female	subadult	Germany	Baden-Württemberg	WN. Winterbach	9.5	48.79	22.06.2013	Wendt. I.	Holstein. J.	ethanol 100%	SMNSAran962
SMNS-Aran-963	Araneae	Araneidae	Mangora acalypha	female	adult	Germany	Baden-Württemberg	WN. Winterbach	9.5	48.79	22.06.2013	Wendt. I.	Holstein. J.	ethanol 100%	SMNSAran963
SMNS-Aran-964	Araneae	Linyphiidae	Lepthyphantes leprosus	male	subadult	Germany	Baden-Württemberg	WN. Winterbach	9.5	48.79	22.06.2013	Wendt. I.	Holstein. J.	ethanol 100%	SMNSAran964
SMNS-Aran-965	Araneae	Linyphiidae	Entelecara congenera	female	adult	Germany	Baden-Württemberg	WN. Winterbach	9.5	48.79	22.06.2013	Wendt. I.	Holstein. J.	ethanol 100%	SMNSAran965
SMNS-Aran-966	Araneae	Theridiidae	Theridion pinastri	male	adult	Germany	Baden-Württemberg	WN. Winterbach	9.5	48.79	22.06.2013	Wendt. I.	Holstein. J.	ethanol 100%	SMNSAran966
SMNS-Aran-967	Araneae	Theridiidae	Phylloneta impressa	male	adult	Germany	Baden-Württemberg	WN. Winterbach	9.5	48.79	22.06.2013	Wendt. I.	Holstein. J.	ethanol 100%	SMNSAran967
SMNS-Aran-968	Araneae	Araneidae	Larinioides patagiatus	female	adult	Germany	Baden-Württemberg	RV. Wurzacher Ried	9.89	47.92	02.07.2013	Krogmann. L.; Kothe. T.	Holstein. J.	ethanol 100%	SMNSAran968
SMNS-Aran-969	Araneae	Oxyopidae	Oxyopes ramosus	female	adult	Germany	Baden-Württemberg	RV. Wurzacher Ried	9.89	47.92	02.07.2013	Krogmann. L.; Kothe. T.	Holstein. J.	ethanol 100%	SMNSAran969
SMNS-Aran-971	Araneae	Araneidae	Hypsosinga sanguinea	female	adult	Germany	Baden-Württemberg	RV. Wurzacher Ried	9.89	47.92	02.07.2013	Krogmann. L.; Kothe. T.	Holstein. J.	ethanol 100%	SMNSAran971
SMNS-Aran-972	Araneae	Salticidae	Evarcha arcuata	male	adult	Germany	Baden-Württemberg	RV. Wurzacher Ried	9.89	47.92	02.07.2013	Krogmann. L.; Kothe. T.	Holstein. J.	ethanol 100%	SMNSAran972
SMNS-Aran-973	Araneae	Tetragnathidae	Pachygnatha listeri	female	adult	Germany	Baden-Württemberg	RV. Wurzacher Ried	9.89	47.92	02.07.2013	Krogmann. L.; Kothe. T.	Holstein. J.	ethanol 100%	SMNSAran973
SMNS-Aran-974	Araneae	Salticidae	Evarcha arcuata	female	adult	Germany	Baden-Württemberg	RV. Wurzacher Ried	9.89	47.92	02.07.2013	Krogmann. L.; Kothe. T.	Holstein. J.	ethanol 100%	SMNSAran974
SMNS-Aran-975	Araneae	Salticidae	Evarcha arcuata	female	adult	Germany	Baden-Württemberg	RV. Wurzacher Ried	9.89	47.92	02.07.2013	Krogmann. L.; Kothe. T.	Holstein. J.	ethanol 100%	SMNSAran975
SMNS-Aran-976	Araneae	Linyphiidae	Neriene radiata	female	adult	Germany	Baden-Württemberg	RV. Wurzacher Ried	9.89	47.92	02.07.2013	Krogmann. L.; Kothe. T.	Holstein. J.	ethanol 100%	SMNSAran976
SMNS-Aran-977	Araneae	Linyphiidae	Neriene radiata	female	adult	Germany	Baden-Württemberg	RV. Wurzacher Ried	9.89	47.92	02.07.2013	Krogmann. L.; Kothe. T.	Holstein. J.	ethanol 100%	SMNSAran977
SMNS-Aran-978	Araneae	Araneidae	Araniella cucurbitina	female	adult	Germany	Baden-Württemberg	BC. Steinhauser Ried	9.65	48.04	02.07.2013	Krogmann. L.; Kothe. T.	Holstein. J.	ethanol 100%	SMNSAran978
SMNS-Aran-979	Araneae	Thomisidae	Misumena vatia	male	adult	Germany	Baden-Württemberg	BC. Steinhauser Ried	9.65	48.04	02.07.2013	Krogmann. L.; Kothe. T.	Holstein. J.	ethanol 100%	SMNSAran979
SMNS-Aran-980	Araneae	Thomisidae	Xysticus ulmi	male	adult	Germany	Baden-Württemberg	BC. Steinhauser Ried	9.65	48.04	02.07.2013	Krogmann. L.; Kothe. T.	Holstein. J.	ethanol 100%	SMNSAran980
SMNS-Aran-981	Araneae	Araneidae	Aculepeira ceropegia	female	adult	Germany	Baden-Württemberg	AA. Bartholomä. Rötenbach	9.96	48.74	09.07.2013	Langer	Holstein. J.	ethanol 100%	SMNSAran981
SMNS-Aran-982	Araneae	Araneidae	Nuctenea umbratica	female	adult	Germany	Baden-Württemberg	GP. Holzheim-Manzen	9.7	48.67	09.07.2013	Langer	Holstein. J.	ethanol 100%	SMNSAran982
SMNS-Aran-983	Araneae	Pisauridae	Pisaura mirabilis	female	adult	Germany	Baden-Württemberg	AA. Bartholomä. Rötenbach	9.96	48.74	09.07.2013	Langer	Holstein. J.	ethanol 100%	SMNSAran983
SMNS-Aran-985	Araneae	Salticidae	Evarcha arcuata	female	adult	Germany	Baden-Württemberg	WT. Stühlingen	8.45	47.75	25.06.2013	Langer	Holstein. J.	ethanol 100%	SMNSAran985
SMNS-Aran-986	Araneae	Araneidae	Aculepeira ceropegia	male	adult	Germany	Baden-Württemberg	FR. Feldberg	8.03	47.86	11.07.2013	Holstein. J.	Holstein. J.	ethanol 100%	SMNSAran986
SMNS-Aran-987	Araneae	Lycosidae	Alopecosa taeniata	female	adult	Germany	Baden-Württemberg	FR. Feldberg	8.03	47.86	11.07.2013	Holstein. J.	Holstein. J.	ethanol 100%	SMNSAran987
SMNS-Aran-990	Araneae	Araneidae	Araniella cucurbitina	male	adult	Germany	Baden-Württemberg	FR. Feldberg	8.03	47.86	11.07.2013	Holstein. J.	Holstein. J.	ethanol 100%	SMNSAran990
SMNS-Aran-991	Araneae	Clubionidae	Clubiona reclusa	male	adult	Germany	Baden-Württemberg	FR. Feldberg	8.03	47.86	11.07.2013	Holstein. J.	Holstein. J.	ethanol 100%	SMNSAran991
SMNS-Aran-993	Araneae	Theridiidae	Asagena phalerata	male	adult	Germany	Baden-Württemberg	FR. Feldberg. Todtnauer Hütte	8	47.87	11.07.2013	Holstein. J.	Holstein. J.	ethanol 100%	SMNSAran993
SMNS-Aran-994	Araneae	Lycosidae	Pardosa amentata	male	adult	Germany	Baden-Württemberg	FR. Feldberg. Todtnauer Hütte	8	47.87	11.07.2013	Holstein. J.	Holstein. J.	ethanol 100%	SMNSAran994
SMNS-Aran-995	Araneae	Theridiidae	Asagena phalerata	male	adult	Germany	Baden-Württemberg	FR. Feldberg. Todtnauer Hütte	8	47.87	11.07.2013	Holstein. J.	Holstein. J.	ethanol 100%	SMNSAran995
SMNS-Aran-996	Araneae	Linyphiidae	Erigone cristatopalpus	female	adult	Germany	Baden-Württemberg	FR. Feldberg. Todtnauer Hütte	8	47.87	11.07.2013	Holstein. J.	Holstein. J.	ethanol 100%	SMNSAran996
SMNS-Aran-997	Araneae	Linyphiidae	Microlinyphia pusilla	female	adult	Germany	Baden-Württemberg	FR. Feldberg. Todtnauer Hütte	8	47.87	11.07.2013	Holstein. J.	Holstein. J.	ethanol 100%	SMNSAran997
SMNS-Aran-998	Araneae	Tetragnathidae	Metellina mengei	male	adult	Germany	Baden-Württemberg	FR. Feldberg. Todtnauer Hütte	8	47.87	11.07.2013	Holstein. J.	Holstein. J.	ethanol 100%	SMNSAran998
SMNS-Aran-999	Araneae	Lycosidae	Pardosa amentata	male	adult	Germany	Baden-Württemberg	FR. Feldberg. Todtnauer Hütte	8	47.87	11.07.2013	Holstein. J.	Holstein. J.	ethanol 100%	SMNSAran999
SMNS-Aran-JH-S 378	Araneae	Agelenidae	Eratigena atrica	female	adult	Germany	Baden-Württemberg	GP. Gingen; Fils	9.78	48.66	29.04.2012	Holstein. J.	Holstein. J.	ethanol 100%	SMNSAranJHS378
SMNS-Aran-JH-S 381	Araneae	Dysderidae	Dysdera crocata	female	adult	Germany	Baden-Württemberg	GP. Gingen; Fils	9.78	48.66	19.05.2012	Holstein. J.	Holstein. J.	ethanol 100%	SMNSAranJHS381
SMNS-Aran-JH-S 384	Araneae	Philodromidae	Philodromus dispar	female	adult	Germany	Baden-Württemberg	GP. Gingen; Fils	9.78	48.66	12.06.2012	Holstein. J.	Holstein. J.	ethanol 100%	SMNSAranJHS384
SMNS-Aran-JH-S 385	Araneae	Araneidae	Nuctenea umbratica	female	adult	Germany	Baden-Württemberg	GP. Gingen; Fils	9.78	48.66	16.06.2012	Holstein. J.	Holstein. J.	ethanol 100%	SMNSAranJHS385
SMNS-Aran-JH-S 387	Araneae	Gnaphosidae	Drassodes lapidosus	female	adult	Germany	Baden-Württemberg	LB. Markgröningen	9.09	48.91	05.07.2012	Holstein. J.	Holstein. J.	ethanol 100%	SMNSAranJHS387
SMNS-Aran-JH-S 388	Araneae	Lycosidae	Pardosa hortensis	female	adult	Germany	Baden-Württemberg	LB. Markgröningen	9.09	48.91	05.07.2012	Holstein. J.	Holstein. J.	ethanol 100%	SMNSAranJHS388
SMNS-Aran-JH-S 389	Araneae	Lycosidae	Pardosa lugubris	female	adult	Germany	Baden-Württemberg	LB. Markgröningen	9.09	48.91	05.07.2012	Holstein. J.	Holstein. J.	ethanol 100%	SMNSAranJHS389
SMNS-Aran-JH-S 390	Araneae	Lycosidae	Aulonia albimana	female	adult	Germany	Baden-Württemberg	LB. Markgröningen	9.09	48.91	05.07.2012	Holstein. J.	Holstein. J.	ethanol 100%	SMNSAranJHS390
SMNS-Aran-JH-S 391	Araneae	Theridiidae	Episinus truncatus	male	adult	Germany	Baden-Württemberg	LB. Markgröningen	9.09	48.91	05.07.2012	Holstein. J.	Holstein. J.	ethanol 100%	SMNSAranJHS391
SMNS-Aran-JH-S 394	Araneae	Araneidae	Nuctenea umbratica	male	adult	Germany	Baden-Württemberg	GP. Gingen; Fils	9.78	48.66	08.08.2012	Holstein. J.	Holstein. J.	ethanol 100%	SMNSAranJHS394
SMNS-Aran-JH-S 396	Araneae	Theridiidae	Steatoda triangulosa	female	adult	Germany	Baden-Württemberg	GP. Gingen; Fils	9.78	48.66	15.12.2012	Holstein. J.	Holstein. J.	ethanol 100%	SMNSAranJHS396
SMNS-Aran-LFR 018	Araneae	Theridiidae	Parasteatoda tepidariorum	female	adult	Germany	Brandenburg	PM. Weitzgrund	12.53	52.19	26.10.2012	Friman. L.	Friman. L.	ethanol 100%	SMNSAranLFR018
SMNS-Aran-LFR 030	Araneae	Atypidae	Atypus affinis	female	adult	Germany	Brandenburg	PM. Dippmannsdorf	12.58	52.15	10.10.2012	Friman. L.	Friman. L.	ethanol 100%	SMNSAranLFR030
SMNS-Aran-LFR 032	Araneae	Linyphiidae	Drapetisca socialis	female	adult	Germany	Sachsen-Anhalt	BÖ. Wanzleben-Börde. Eggenstedt	11.24	52.11	28.09.2012	Friman. L.	Friman. L.	ethanol 100%	SMNSAranLFR032
SMNS-Aran-LFR 035	Araneae	Araneidae	Gibbaranea omoeda	female	subadult	Germany	Sachsen-Anhalt	BÖ. Colbitz	11.6	52.33	20.08.2012	Friman. L.	Friman. L.	ethanol 100%	SMNSAranLFR035
SMNS-Aran-LFR 046	Araneae	Eutichuridae	Cheiracanthium punctorium	female	adult	Germany	Brandenburg	PM. Treuenbrietzen	12.79	52.08	22.10.2012	Friman. L.	Friman. L.	ethanol 100%	SMNSAranLFR046
SMNS-Aran-LFR 047	Araneae	Eutichuridae	Cheiracanthium punctorium	female	adult	Germany	Sachsen-Anhalt	BÖ. Haldensleben	11.43	52.31	19.08.2012	Friman. L.	Friman. L.	ethanol 100%	SMNSAranLFR047
SMNS-Aran-LFR 048	Araneae	Araneidae	Araneus angulatus	female	juvenile	Germany	Brandenburg	PM. Treuenbrietzen	12.79	52.08	22.10.2012	Friman. L.	Holstein. J.	ethanol 100%	SMNSAranLFR048
SMNS-Aran-LFR 064	Araneae	Araneidae	Cyclosa conica	female	adult	Germany	Brandenburg	PM. Kloster Lehnin. Michelsdorf	12.55	52.32	04.11.2012	Friman. L.	Friman. L.	ethanol 100%	SMNSAranLFR064
SMNS-Aran-LFR 065	Araneae	Araneidae	Agalenatea redii	female	adult	Germany	Brandenburg	PM. Bad Belzig	12.58	52.15	10.10.2012	Friman. L.	Friman. L.	ethanol 100%	SMNSAranLFR065
SMNS-Aran-LFR 066	Araneae	Gnaphosidae	Zelotes subterraneus	female	adult	Germany	Brandenburg	PM. Nuthetal. Saarmund	13.12	52.31	10.09.2012	Voß; Friman. L.	Friman. L.	ethanol 100%	SMNSAranLFR066
SMNS-Aran-LFR 072	Araneae	Tetragnathidae	Metellina merianae	female	adult	Germany	Brandenburg	PM. Bad Belzig	12.53	52.19	12.08.2012	Friman. L.	Friman. L.	ethanol 100%	SMNSAranLFR072
SMNS-Aran-LFR 075	Araneae	Araneidae	Cyclosa conica	female	adult	Germany	Brandenburg	PM. Bad Belzig	12.58	52.15	01.11.2012	Friman. L.	Friman. L.	ethanol 100%	SMNSAranLFR075
SMNS-Aran-LFR 076	Araneae	Araneidae	Cercidia prominens	female	adult	Germany	Sachsen-Anhalt	SDL. Tangerhütte. Weißewarte	11.86	52.49	18.08.2012	Friman. L.	Friman. L.	ethanol 100%	SMNSAranLFR076
SMNS-Aran-LFR 080	Araneae	Thomisidae	Synema globosum	female	adult	Germany	Sachsen-Anhalt	SDL. Tangerhütte. Weißewarte	11.86	52.49	18.08.2012	Friman. L.	Friman. L.	ethanol 100%	SMNSAranLFR080
SMNS-Aran-LFR 082	Araneae	Thomisidae	Synema globosum	female	adult	Germany	Sachsen-Anhalt	SDL. Tangerhütte. Weißewarte	11.86	52.49	18.08.2012	Friman. L.	Friman. L.	ethanol 100%	SMNSAranLFR082
SMNS-Aran-LFR 085	Araneae	Tetragnathidae	Metellina segmentata	female	adult	Germany	Brandenburg	PM. Bad Belzig	12.59	52.17	25.09.2012	Friman. L.	Friman. L.	ethanol 100%	SMNSAranLFR085
SMNS-Aran-LFR 086	Araneae	Gnaphosidae	Micaria subopaca	female	adult	Germany	Sachsen-Anhalt	BÖ. Haldensleben	11.43	52.31	18.08.2012	Lemke. M.; Friman. L.	Friman. L.	ethanol 100%	SMNSAranLFR086
SMNS-Aran-LFR 087	Araneae	Linyphiidae	Floronia bucculenta	female	adult	Germany	Sachsen-Anhalt	SDL. Tangerhütte. Weißewarte	11.86	52.49	18.08.2012	Lemke. M.; Friman. L.	Friman. L.	ethanol 100%	SMNSAranLFR087
SMNS-Aran-LFR 089	Araneae	Linyphiidae	Lepthyphantes minutus	female	adult	Germany	Sachsen-Anhalt	SDL. Tangerhütte. Weißewarte	11.86	52.49	18.08.2012	Lemke. M.; Friman. L.	Friman. L.	ethanol 100%	SMNSAranLFR089
SMNS-Aran-LFR 090	Araneae	Thomisidae	Pistius truncatus	female	adult	Germany	Sachsen-Anhalt	BÖ. Haldensleben	11.43	52.31	18.08.2012	Lemke. M.; Friman. L.	Friman. L.	ethanol 100%	SMNSAranLFR090
SMNS-Aran-LFR 092	Araneae	Araneidae	Neoscona adianta	female	adult	Germany	Sachsen-Anhalt	BÖ. Haldensleben	11.43	52.31	18.08.2012	Friman. L.	Friman. L.	ethanol 100%	SMNSAranLFR092
SMNS-Aran-LFR 093	Araneae	Salticidae	Evarcha falcata	male	adult	Germany	Sachsen-Anhalt	BÖ. Haldensleben	11.43	52.31	18.08.2012	Friman. L.	Friman. L.	ethanol 100%	SMNSAranLFR093
SMNS-Aran-LFR 098	Araneae	Philodromidae	Philodromus collinus	female	adult	Germany	Sachsen-Anhalt	SDL. Tangerhütte. Weißewarte	11.86	52.49	17.08.2012	Friman. L.	Friman. L.	ethanol 100%	SMNSAranLFR098
SMNS-Aran-LFR 100	Araneae	Salticidae	Dendryphantes rudis	female	adult	Germany	Sachsen-Anhalt	SDL. Tangerhütte. Weißewarte	11.86	52.49	17.08.2012	Friman. L.	Friman. L.	ethanol 100%	SMNSAranLFR100
SMNS-Opil-1002	Opiliones	Phalangiidae	Mitopus morio	female	juvenile	Germany	Baden-Württemberg	FR. Feldberg. Todtnauer Hütte	8	47.87	11.07.2013	Holstein. J.	Holstein. J.	ethanol 100%	SMNSOpil1002
SMNS-Opil-1003	Opiliones	Phalangiidae	Mitopus morio	female	juvenile	Germany	Baden-Württemberg	FR. Feldberg. Todtnauer Hütte	8	47.87	11.07.2013	Holstein. J.	Holstein. J.	ethanol 100%	SMNSOpil1003
SMNS-Opil-1006	Opiliones	Phalangiidae	Mitopus morio	female	juvenile	Germany	Baden-Württemberg	FR. Feldberg. Todtnauer Hütte	8	47.87	11.07.2013	Holstein. J.	Holstein. J.	ethanol 100%	SMNSOpil1006
SMNS-Opil-891	Opiliones	Trogulidae	Trogulus martensi	female	adult	Germany	Baden-Württemberg	UL. Lautern	9.88	48.44	03.06.2013	Holstein. J.; Leidenroth	Muster. C.	ethanol 100%	SMNSOpil891
SMNS-Opil-988	Opiliones	Phalangiidae	Rilaena triangularis	male	adult	Germany	Baden-Württemberg	FR. Feldberg	8.03	47.86	11.07.2013	Holstein. J.	Muster. C.	ethanol 100%	SMNSOpil988
SMNS-Opil-989	Opiliones	Phalangiidae	Rilaena triangularis	female	adult	Germany	Baden-Württemberg	FR. Feldberg	8.03	47.86	11.07.2013	Holstein. J.	Muster. C.	ethanol 100%	SMNSOpil989
SMNS-Opil-LFR 001	Opiliones	Phalangiidae	Mitopus morio	female	adult	Austria	Oberösterreich	Großglockner. beim Haus Alpine Naturschau	12.82	47.12	22.09.2012	Friman. L.	Friman. L.	ethanol 100%	SMNSOpilLFR001
SMNS-Opil-LFR 002	Opiliones	Phalangiidae	Amilenus aurantiacus	female	adult	Austria	Oberösterreich	Großglockner. Hochalpenstr. bei Wölflern	12.83	47.2	22.09.2012	Friman. L.	Friman. L.	ethanol 100%	SMNSOpilLFR002
SMNS-Opil-LFR 003	Opiliones	Phalangiidae	Oligolophus tridens	male	adult	Austria	Oberösterreich	Großglockner. Hochalpenstr. bei Wölflern	12.83	47.2	22.09.2012	Friman. L.	Friman. L.	ethanol 100%	SMNSOpilLFR003
SMNS-Opil-LFR 004	Opiliones	Phalangiidae	Oligolophus tridens	female	adult	Austria	Oberösterreich	Großglockner. Hochalpenstr. bei Wölflern	12.83	47.2	22.09.2012	Friman. L.	Friman. L.	ethanol 100%	SMNSOpilLFR004
SMNS-Opil-LFR 005	Opiliones	Phalangiidae	Oligolophus tridens	male	adult	Germany	Brandenburg	PM. Baitz	12.8	52.14	27.10.2012	Friman. L.	Friman. L.	ethanol 100%	SMNSOpilLFR005
SMNS-Opil-LFR 006	Opiliones	Phalangiidae	Oligolophus tridens	female	adult	Germany	Brandenburg	PM. Baitz	12.8	52.14	27.10.2012	Friman. L.	Friman. L.	ethanol 100%	SMNSOpilLFR006
SMNS-Opil-LFR 007	Opiliones	Phalangiidae	Phalangium opilio	male	adult	Austria	Oberösterreich	Scharnstein	13.97	47.9	08.06.2012	Friman. L.	Friman. L.	ethanol 100%	SMNSOpilLFR007
SMNS-Opil-LFR 009	Opiliones	Phalangiidae	Odiellus spinosus	female	adult	Germany	Brandenburg	PM. Golzow	12.62	52.24	10.10.2012	Friman. L.	Friman. L.	ethanol 100%	SMNSOpilLFR009
SMNS-Opil-LFR 010	Opiliones	Phalangiidae	Opilio parietinus	female	adult	Germany	Sachsen-Anhalt	BÖ. Haldensleben	11.41	52.3	18.08.2012	Friman. L.	Muster. C.	ethanol 100%	SMNSOpilLFR010
SMNS-Opil-LFR 011	Opiliones	Phalangiidae	Opilio parietinus	female	adult	Germany	Sachsen-Anhalt	BÖ. Haldensleben	11.41	52.3	18.08.2012	Friman. L.	Muster. C.	ethanol 100%	SMNSOpilLFR011
SMNS-Opil-LFR 017	Opiliones	Phalangiidae	Opilio canestrinii	female	adult	Germany	Mecklenburg-Vorpommern	Feldberger Seenlandschaft. Fürstenhagen	13.5	53.34	10.09.2012	Friman. L.	Friman. L.	ethanol 100%	SMNSOpilLFR017
SMNS-Opil-LFR 020	Opiliones	Phalangiidae	Lacinius dentiger	female	adult	Germany	Mecklenburg-Vorpommern	Feldberger Seenlandschaft. Fürstenhagen	13.5	53.34	10.09.2012	Friman. L.	Friman. L.	ethanol 100%	SMNSOpilLFR020
SMNS-Opil-LFR 024	Opiliones	Phalangiidae	Platybunus pinetorum	female	adult	Austria	Oberösterreich	Hoher Dirn	14.42	47.91	08.06.2012	Friman. L.	Muster. C.	ethanol 100%	SMNSOpilLFR024
SMNS-Opil-LFR 027	Opiliones	Phalangiidae	Paroligolophus agrestis	female	adult	Germany	Brandenburg	PM. Bad Belzig	12.59	52.17	09.09.2012	Friman. L.	Friman. L.	ethanol 100%	SMNSOpilLFR027
SMNS-Opil-LFR 028	Opiliones	Phalangiidae	Paroligolophus agrestis	male	adult	Germany	Brandenburg	PM. Bad Belzig	12.59	52.17	09.09.2012	Friman. L.	Friman. L.	ethanol 100%	SMNSOpilLFR028
SMNS-Opil-LFR 029	Opiliones	Phalangiidae	Paroligolophus agrestis	female	adult	Germany	Sachsen-Anhalt	BÖ. Haldensleben	11.6	52.33	19.08.2012	Friman. L.	Friman. L.	ethanol 100%	SMNSOpilLFR029
SMNS-Opil-LFR 031	Opiliones	Phalangiidae	Lophopilio palpinalis	female	adult	Germany	Brandenburg	PM. Bad Belzig	12.59	52.17	25.09.2012	Friman. L.	Friman. L.	ethanol 100%	SMNSOpilLFR031
SMNS-Opil-LFR 033	Opiliones	Sclerosomatidae	Gyas titanus	female	juvenile	Austria	Oberösterreich	Großglockner. Hochalpenstr. bei Wölflern	12.83	47.2	22.09.2012	Friman. L.	Friman. L.	ethanol 100%	SMNSOpilLFR033
SMNS-Opil-LFR 037	Opiliones	Sclerosomatidae	Leiobunum blackwalli	male	adult	Germany	Sachsen-Anhalt	SDL. Tangerhütte. Weißewarte	11.86	52.49	20.08.2012	Friman. L.	Friman. L.	ethanol 100%	SMNSOpilLFR037
SMNS-Opil-LFR 038	Opiliones	Sclerosomatidae	Leiobunum blackwalli	female	adult	Germany	Sachsen-Anhalt	SDL. Tangerhütte. Weißewarte	11.86	52.49	20.08.2012	Friman. L.	Friman. L.	ethanol 100%	SMNSOpilLFR038
SMNS-Opil-LFR 039	Opiliones	Sclerosomatidae	Leiobunum rotundum	female	adult	Germany	Brandenburg	PM. Bad Belzig	12.58	52.15	24.10.2012	Friman. L.	Friman. L.	ethanol 100%	SMNSOpilLFR039
SMNS-Opil-LFR 040	Opiliones	Phalangiidae	Rilaena triangularis	male	adult	Germany	Brandenburg	PM. Bad Belzig	12.58	52.15	24.10.2012	Friman. L.	Muster. C.	ethanol 100%	SMNSOpilLFR040
SMNS-Opil-LFR 041	Opiliones	Phalangiidae	Lacinius dentiger	male	adult	Germany	Brandenburg	PM. Bad Belzig	12.58	52.15	04.11.2012	Friman. L.	Friman. L.	ethanol 100%	SMNSOpilLFR041
SMNS-Opil-LFR 042	Opiliones	Phalangiidae	Opilio canestrinii	male	adult	Germany	Bayern	R. Donaustauf; Walhalla	12.21	49.03	21.09.2012	Friman. L.	Friman. L.	ethanol 100%	SMNSOpilLFR042
SMNS-Opil-LFR 043	Opiliones	Phalangiidae	Opilio canestrinii	female	adult	Germany	Sachsen-Anhalt	BÖ. Haldensleben	11.41	52.3	19.08.2012	Friman. L.	Friman. L.	ethanol 100%	SMNSOpilLFR043
SMNS-Opil-LFR 044	Opiliones	Phalangiidae	Lacinius dentiger	female	adult	Germany	Schleswig-Holstein	HL. Travemünde	10.89	53.98	07.09.2012	Friman. L.	Friman. L.	ethanol 100%	SMNSOpilLFR044
SMNS-Opil-LFR 049	Opiliones	Phalangiidae	Odiellus spinosus	female	adult	Germany	Sachsen-Anhalt	BÖ. Colbitz	11.6	52.33	19.08.2012	Friman. L.	Friman. L.	ethanol 100%	SMNSOpilLFR049
SMNS-Opil-LFR 050	Opiliones	Phalangiidae	Odiellus spinosus	female	adult	Germany	Brandenburg	PM. Görzke	12.38	52.19	21.08.2012	Friman. L.	Friman. L.	ethanol 100%	SMNSOpilLFR050
SMNS-Opil-LFR 051	Opiliones	Phalangiidae	Opilio parietinus	female	adult	Germany	Sachsen-Anhalt	BLK. Naumburg (Saale)	11.8	51.15	13.07.2012	Neumann; Friman. L.	Muster. C.	ethanol 100%	SMNSOpilLFR051
SMNS-Opil-LFR 052	Opiliones	Phalangiidae	Opilio canestrinii	female	adult	Germany	Bayern	REG. Viechtach	12.87	49.08	21.09.2012	Friman. L.	Friman. L.	ethanol 100%	SMNSOpilLFR052
SMNS-Opil-LFR 054	Opiliones	Phalangiidae	Mitopus morio	male	adult	Germany	Bayern	REG. Viechtach	12.87	49.08	21.09.2012	Friman. L.	Friman. L.	ethanol 100%	SMNSOpilLFR054
SMNS-Opil-LFR 055	Opiliones	Phalangiidae	Mitopus morio	female	adult	Germany	Brandenburg	PM. Bad Belzig	12.64	52.17	15.09.2012	Friman. L.	Friman. L.	ethanol 100%	SMNSOpilLFR055
SMNS-Opil-LFR 058	Opiliones	Phalangiidae	Odiellus spinosus	male	adult	Germany	Brandenburg	PM. Niemegk	12.7	52.1	30.09.2012	Friman. L.	Friman. L.	ethanol 100%	SMNSOpilLFR058
SMNS-Opil-LFR 059	Opiliones	Phalangiidae	Odiellus spinosus	female	adult	Germany	Brandenburg	PM. Niemegk	12.7	52.1	30.09.2012	Friman. L.	Friman. L.	ethanol 100%	SMNSOpilLFR059
SMNS-Opil-LFR 061	Opiliones	Phalangiidae	Opilio canestrinii	male	adult	Germany	Sachsen-Anhalt	BÖ. Wanzleben-Börde. Eggenstedt	11.24	52.11	28.09.2012	Friman. L.	Friman. L.	ethanol 100%	SMNSOpilLFR061
SMNS-Opil-LFR 062	Opiliones	Phalangiidae	Phalangium opilio	female	adult	Germany	Sachsen-Anhalt	HZ. Huy. Eilsdorf	11.43	52	28.09.2012	Friman. L.	Friman. L.	ethanol 100%	SMNSOpilLFR062
SMNS-Opil-LFR 063	Opiliones	Nemastomatidae	Mitostoma chrysomelas	male	adult	Germany	Bayern	RO. Kiefersfelden. Inntal-West	12.2	47.61	21.09.2012	Friman. L.	Friman. L.	ethanol 100%	SMNSOpilLFR063
SMNS-Opil-LFR 067	Opiliones	Nemastomatidae	Nemastoma triste	female	adult	Austria	Oberösterreich	Großglockner. beim Haus Alpine Naturschau	12.82	47.12	22.09.2012	Friman. L.	Friman. L.	ethanol 100%	SMNSOpilLFR067
SMNS-Opil-LFR 068	Opiliones	Phalangiidae	Phalangium opilio	male	adult	Germany	Sachsen-Anhalt	HZ. Huy. Eilsdorf	11.43	52	28.09.2012	Friman. L.	Friman. L.	ethanol 100%	SMNSOpilLFR068
SMNS-Opil-LFR 070	Opiliones	Nemastomatidae	Nemastoma lugubre	female	adult	Germany	Sachsen-Anhalt	SDL. Tangerhütte. Schelldorf. Elbaltarm	11.97	52.46	19.08.2012	Friman. L.	Friman. L.	ethanol 100%	SMNSOpilLFR070
SMNS-Opil-LFR 071	Opiliones	Nemastomatidae	Nemastoma lugubre	female	adult	Germany	Schleswig-Holstein	SL. Kappeln	9.96	54.78	05.07.2012	Friman. L.	Friman. L.	ethanol 100%	SMNSOpilLFR071
SMNS-Opil-LFR 073	Opiliones	Phalangiidae	Platybunus bucephalus	female	juvenile	Austria	Oberösterreich	Großglockner. beim Haus Alpine Naturschau	12.82	47.12	22.09.2012	Friman. L.	Muster. C.	ethanol 100%	SMNSOpilLFR073
SMNS-Opil-LFR 074	Opiliones	Phalangiidae	Lacinius dentiger	female	adult	Germany	Sachsen-Anhalt	WB. Wittenberg	12.62	51.88	05.11.2012	Friman. L.	Friman. L.	ethanol 100%	SMNSOpilLFR074
SMNS-Opil-LFR 077	Opiliones	Phalangiidae	Paroligolophus agrestis	female	adult	Germany	Schleswig-Holstein	HL. Travemünde. Priwall	11.25	53.63	07.09.2012	Friman. L.	Friman. L.	ethanol 100%	SMNSOpilLFR077
SMNS-Opil-LFR 079	Opiliones	Phalangiidae	Phalangium opilio	male	adult	Germany	Schleswig-Holstein	HL. Travemünde. Priwall	11.25	53.63	07.09.2012	Friman. L.	Friman. L.	ethanol 100%	SMNSOpilLFR079
SMNS-Opil-LFR 081	Opiliones	Sclerosomatidae	Leiobunum rotundum	male	adult	Germany	Sachsen-Anhalt	SDL. Tangerhütte. Weißewarte	11.86	52.49	18.08.2012	Friman. L.	Friman. L.	ethanol 100%	SMNSOpilLFR081
SMNS-Opil-LFR 083	Opiliones	Phalangiidae	Lacinius dentiger	female	adult	Germany	Sachsen-Anhalt	JL. Möckern. Altengrabow	12.18	52.2	04.11.2012	Friman. L.	Friman. L.	ethanol 100%	SMNSOpilLFR083
SMNS-Opil-LFR 095	Opiliones	Phalangiidae	Lophopilio palpinalis	female	adult	Germany	Brandenburg	PM. Bad Belzig	12.59	52.17	25.09.2012	Friman. L.	Friman. L.	ethanol 100%	SMNSOpilLFR095
SMNS-Opil-LFR 096	Opiliones	Phalangiidae	Oligolophus tridens	female	adult	Germany	Sachsen-Anhalt	BÖ. Wanzleben-Börde. Eggenstedt	11.24	52.11	28.09.2012	Friman. L.	Friman. L.	ethanol 100%	SMNSOpilLFR096
SMNS-Opil-LFR 097	Opiliones	Ischyropsalididae	Ischyropsalis kollari	female	adult	Austria	Oberösterreich	Großglocknerr. Hochalpenstr.	12.83	47.12	13.06.2012	Friman. L.	Friman. L.	ethanol 100%	SMNSOpilLFR097
SMNS-Opil-LFR 099	Opiliones	Phalangiidae	Paroligolophus agrestis	female	adult	Germany	Sachsen-Anhalt	BÖ. Wanzleben-Börde. Eggenstedt	11.24	52.11	28.09.2012	Friman. L.	Friman. L.	ethanol 100%	SMNSOpilLFR099
ZFMK-GBOL-26193	Araneae	Araneidae	Araniella opisthographa	male	adult	Germany	Nordrhein-Westfalen	Quirrenbach	7.31	50.69	10.5.2012	Huber. B.A. et al.	Huber. B.A.	ethanol 96%	ZFMKGBOL26193
ZFMK-GBOL-26195	Araneae	Linyphiidae	Neriene peltata	male	adult	Germany	Nordrhein-Westfalen	Quirrenbach	7.31	50.69	10.5.2012	Huber. B.A. et al.	Huber. B.A.	ethanol 96%	ZFMKGBOL26195
ZFMK-GBOL-26196	Araneae	Lycosidae	Piratula hygrophila	male	adult	Germany	Nordrhein-Westfalen	Quirrenbach	7.31	50.69	10.5.2012	Huber. B.A. et al.	Huber. B.A.	ethanol 96%	ZFMKGBOL26196
ZFMK-GBOL-26197	Araneae	Anyphaenidae	Anyphaena accentuata	male	adult	Germany	Nordrhein-Westfalen	Quirrenbach	7.31	50.69	10.5.2012	Huber. B.A. et al.	Huber. B.A.	ethanol 96%	ZFMKGBOL26197
ZFMK-GBOL-26198	Araneae	Clubionidae	Clubiona pallidula	male	adult	Germany	Nordrhein-Westfalen	Quirrenbach	7.31	50.69	10.5.2012	Huber. B.A. et al.	Huber. B.A.	ethanol 96%	ZFMKGBOL26198
ZFMK-GBOL-26199	Araneae	Clubionidae	Clubiona comta	male	adult	Germany	Nordrhein-Westfalen	Quirrenbach	7.31	50.69	10.5.2012	Huber. B.A. et al.	Huber. B.A.	ethanol 96%	ZFMKGBOL26199
ZFMK-GBOL-26201	Araneae	Dictynidae	Nigma flavescens	male	adult	Germany	Nordrhein-Westfalen	Quirrenbach	7.31	50.69	10.5.2012	Huber. B.A. et al.	Huber. B.A.	ethanol 96%	ZFMKGBOL26201
ZFMK-GBOL-26202	Araneae	Salticidae	Evarcha arcuata	male	adult	Germany	Nordrhein-Westfalen	Quirrenbach	7.31	50.69	10.5.2012	Huber. B.A. et al.	Huber. B.A.	ethanol 96%	ZFMKGBOL26202
ZFMK-GBOL-26204	Araneae	Lycosidae	Pardosa lugubris	male	adult	Germany	Nordrhein-Westfalen	Bonn. Kottenforst. Friesdorf	7.12	50.69	17.5.2012	Huber. B.A.	Huber. B.A.	ethanol 96%	ZFMKGBOL26204
ZFMK-GBOL-26206	Araneae	Theridiidae	Enoplognatha ovata	male	adult	Germany	Nordrhein-Westfalen	Bonn. Bad Godesberg	7.14	50.69	2.6.2012	Huber. B.A.	Huber. B.A.	ethanol 96%	ZFMKGBOL26206
ZFMK-GBOL-26207	Araneae	Tetragnathidae	Tetragnatha montana	male	adult	Germany	Nordrhein-Westfalen	Bonn. Kottenforst. Schweinheim	7.12	50.67	28.5.2012	Huber. B.A.	Huber. B.A.	ethanol 96%	ZFMKGBOL26207
ZFMK-GBOL-26209	Araneae	Theridiidae	Platnickina tincta	male	adult	Germany	Nordrhein-Westfalen	Bonn. Kottenforst. Schweinheim	7.12	50.67	28.5.2012	Huber. B.A.	Huber. B.A.	ethanol 96%	ZFMKGBOL26209
ZFMK-GBOL-26211	Araneae	Tetragnathidae	Pachygnatha degeeri	male	adult	Austria		Ramsau	14.24	47.85	30.08.2012	Huber. B.A.	Astrin. J.J.	ethanol 96%	ZFMKGBOL26211
ZFMK-GBOL-26213	Araneae	Linyphiidae	Gonatium rubens	male	adult	Austria		Ramsau	14.24	47.85	30.08.2012	Huber. B.A.	Huber. B.A.	ethanol 96%	ZFMKGBOL26213
ZFMK-GBOL-26214	Araneae	Araneidae	Araneus quadratus	male	adult	Austria		Ramsau	14.24	47.85	30.08.2012	Huber. B.A.	Huber. B.A.	ethanol 96%	ZFMKGBOL26214
ZFMK-GBOL-26216	Araneae	Salticidae	Evarcha arcuata	male	adult	Austria		Ramsau	14.24	47.85	30.08.2012	Huber. B.A.	Huber. B.A.	ethanol 96%	ZFMKGBOL26216
ZFMK-GBOL-26217	Araneae	Salticidae	Evarcha laetabunda	male	adult	Austria		Ramsau	14.24	47.85	30.08.2012	Huber. B.A.	Huber. B.A.	ethanol 96%	ZFMKGBOL26217
ZFMK-GBOL-26219	Araneae	Linyphiidae	Lepthyphantes minutus	male	adult	Germany	Nordrhein-Westfalen	Bonn. Bad Godesberg	7.15	50.69	21.8.2012	Huber. B.A.	Huber. B.A.	ethanol 96%	ZFMKGBOL26219
ZFMK-GBOL-26222	Araneae	Linyphiidae	Oedothorax retusus	male	adult	Germany	Nordrhein-Westfalen	Bonn	7.16	50.71	17.6.2012	Huber. B.A.	Huber. B.A.	ethanol 96%	ZFMKGBOL26222
ZFMK-GBOL-26224	Araneae	Agelenidae	Allagelena gracilens	male	adult	Germany	Nordrhein-Westfalen	Bonn. Bad Godesberg	7.15	50.69	29.8.2012	Huber. B.A.	Huber. B.A.	ethanol 96%	ZFMKGBOL26224
ZFMK-GBOL-26226	Araneae	Pisauridae	Pisaura mirabilis	male	adult	Germany	Rheinland-Pfalz	Niederzissen. Bausenberg	7.22	50.47	16.5.2012	Wesener. T. et al.	Huber. B.A.	ethanol 96%	ZFMKGBOL26226
ZFMK-GBOL-26227	Araneae	Gnaphosidae	Trachyzelotes pedestris	male	adult	Germany	Rheinland-Pfalz	Niederzissen. Bausenberg	7.22	50.47	16.5.2012	Wesener. T. et al.	Huber. B.A.	ethanol 96%	ZFMKGBOL26227
ZFMK-GBOL-26228	Araneae	Linyphiidae	Neriene emphana	male	adult	Germany	Nordrhein-Westfalen	Bonn. Kottenforst. Friesdorf	7.12	50.69	22.6.2012	Huber. B.A.	Huber. B.A.	ethanol 96%	ZFMKGBOL26228
ZFMK-GBOL-26230	Araneae	Linyphiidae	Tenuiphantes zimmermanni	male	adult	Germany	Nordrhein-Westfalen	Bonn. Kottenforst. Friesdorf	7.12	50.69	22.6.2012	Huber. B.A.	Huber. B.A.	ethanol 96%	ZFMKGBOL26230
ZFMK-GBOL-38855. ZFMK-DNA-100437047	Opiliones	Sclerosomatidae	Leiobunum religiosum			Germany	Rheinland-Pfalz	Mayen	7.23	50.32	1.10.2007	Hillen. J.; Kaster. T.; Kiefer. A.; Schönhofer. A.	Schönhofer. A.	ethanol 96%	ZFMKGBOL38855
ZFMK-GBOL-38857. ZFMK-DNA-100436820	Opiliones	Sclerosomatidae	Nelima silvatica			Germany	Baden-Württemberg	Kaiserstuhl	7.7	48.08	12.9.2005	Schönhofer. A.	Schönhofer. A.	ethanol 96%	ZFMKGBOL38857
ZFMK-GBOL-38861. ZFMK-DNA-100437050	Opiliones	Trogulidae	Trogulus tingiformis			Austria		Griffen	14.73	46.71	12.6.2004	Komposch. Ch.	Schönhofer. A.	ethanol 96%	ZFMKGBOL38861
ZFMK-GBOL-38862. ZFMK-DNA-100436808	Opiliones	Trogulidae	Trogulus martensi			Germany	Rheinland-Pfalz	Bad Kreuznach	7.85	49.81	7.9.2004	Schönhofer. A.	Schönhofer. A.	ethanol 96%	ZFMKGBOL38862
ZFMK-GBOL-38864. ZFMK-DNA-100436815	Opiliones	Trogulidae	Trogulus nepaeformis			Slovenia		Idrija	14.03	46	31.5.2004	Novak. T.; Novak. S.	Schönhofer. A.	ethanol 96%	ZFMKGBOL38864
ZFMK-GBOL-38866. ZFMK-DNA-100436822	Opiliones	Trogulidae	Anelasmocephalus cambridgei			Germany	Rheinland-Pfalz	Alzey	7.96	49.75	13.5.2004	Schönhofer. A.	Schönhofer. A.	ethanol 96%	ZFMKGBOL38866
ZFMK-GBOL-38867. ZFMK-DNA-100436831	Opiliones	Nemastomatidae	Paranemastoma quadripunctatum			Germany	Hessen	Wiesbaden	8.18	50.11	31.6.2008	Becker. P.; Hoenig. E.; Katzschner. I.; Schönhofer. A.	Schönhofer. A.	ethanol 96%	ZFMKGBOL38867
ZFMK-TIS-15893	Araneae	Thomisidae	Synema globosum	female	adult	Austria		St. Valentin. Niederösterreich	14.5	48.19	3.9.2012	Freudenschuss. M.	Freudenschuss. M.	ethanol 96%	ZFMKTIS15893
ZFMK-TIS-15895	Araneae	Salticidae	Neon reticulatus	female	adult	Austria		St. Valentin. Niederösterreich	11.6	50.94	3.9.2012	Freudenschuss. M.	Freudenschuss. M.	ethanol 96%	ZFMKTIS15895
ZFMK-TIS-15896	Araneae	Agelenidae	Allagelena gracilens	male	adult	Austria		St. Valentin. Niederösterreich	11.6	50.94	3.9.2012	Freudenschuss. M.	Huber. B.A.	ethanol 96%	ZFMKTIS15896
ZFMK-TIS-15897	Araneae	Salticidae	Evarcha falcata	male	juvenile	Austria		St. Valentin. Niederösterreich	11.6	50.94	3.9.2012	Freudenschuss. M.	Freudenschuss. M.	ethanol 96%	ZFMKTIS15897
ZFMK-TIS-15898	Araneae	Thomisidae	Ozyptila claveata	male	adult	Austria		St. Valentin. Niederösterreich	11.61	50.68	3.9.2012	Freudenschuss. M.	Freudenschuss. M.	ethanol 96%	ZFMKTIS15898
ZFMK-TIS-15899	Araneae	Araneidae	Nuctenea umbratica	female	adult	Austria		St. Valentin. Niederösterreich	11.61	50.69	4.9.2012	Freudenschuss. M.	Freudenschuss. M.	ethanol 96%	ZFMKTIS15899
ZFMK-TIS-15900	Araneae	Tetragnathidae	Metellina segmentata	male	adult	Austria		Sandl Tafelberg. Oberösterreich	14.64	48.56	28.8.2012	Kugler. K.	Freudenschuss. M.	ethanol 96%	ZFMKTIS15900
ZFMK-TIS-15901	Araneae	Araneidae	Araneus diadematus	female	adult	Austria		Sandl Tafelberg. Oberösterreich	14.64	48.56	28.8.2012	Kugler. K.	Freudenschuss. M.	ethanol 96%	ZFMKTIS15901
ZFMK-TIS-15903	Araneae	Araneidae	Larinioides sclopetarius	female	adult	Austria		Linz	14.3	48.31	23.8.2012	Freudenschuss. M.	Freudenschuss. M.	ethanol 96%	ZFMKTIS15903
ZFMK-TIS-15904	Araneae	Lycosidae	Pirata piraticus	female	adult	Austria		Plesching Oberösterreich	14.39	48.27	4.9.2012	Freudenschuss. M.	Freudenschuss. M.	ethanol 96%	ZFMKTIS15904
ZFMK-TIS-15905	Araneae	Linyphiidae	Linyphia triangularis	female	adult	Austria		Plesching Oberösterreich	14.39	48.27	4.9.2012	Freudenschuss. M.	Freudenschuss. M.	ethanol 96%	ZFMKTIS15905
ZFMK-TIS-15907	Araneae	Salticidae	Dendryphantes rudis	female	adult	Austria		St. Valentin. Niederösterreich	11.62	50.92	3.9.2012	Freudenschuss. M.	Freudenschuss. M.	ethanol 96%	ZFMKTIS15907
ZFMK-TIS-15908	Araneae	Araneidae	Araneus quadratus	male	adult	Austria		St. Valentin. Niederösterreich	11.62	50.92	3.9.2012	Freudenschuss. M.	Freudenschuss. M.	ethanol 96%	ZFMKTIS15908
ZFMK-TIS-15909	Araneae	Salticidae	Pseudeuophrys lanigera	male	adult	Austria		St. Valentin. Niederösterreich	14.5	48.19	8.9.2012	Freudenschuss. M.	Freudenschuss. M.	ethanol 96%	ZFMKTIS15909
ZFMK-TIS-15911	Araneae	Salticidae	Evarcha arcuata	male	adult	Austria		St. Valentin. Niederösterreich	14.5	48.19	3.9.2012	Freudenschuss. M.	Freudenschuss. M.	ethanol 96%	ZFMKTIS15911
ZFMK-TIS-15912	Araneae	Thomisidae	Tmarus piger	female	juvenile	Austria		St. Valentin. Niederösterreich	14.5	48.19	3.9.2012	Freudenschuss. M.	Freudenschuss. M.	ethanol 96%	ZFMKTIS15912
ZFMK-TIS-15915	Araneae	Lycosidae	Aulonia albimana	male	juvenile	Austria		St. Valentin. Niederösterreich	14.5	48.19	3.9.2012	Freudenschuss. M.	Freudenschuss. M.	ethanol 96%	ZFMKTIS15915
ZFMK-TIS-15917	Araneae	Theridiidae	Theridion varians	male	adult	Austria		Losenstein. Oberösterreich	14.42	47.91	8.6.2012	Merches. E.	Merches. E.	ethanol 96%	ZFMKTIS15917
ZFMK-TIS-15919	Araneae	Lycosidae	Pardosa amentata	male	adult	Austria		Hohe Tauern. Salzburg	12.81	47.14	13.6.2012	Merches. E.	Merches. E.	ethanol 96%	ZFMKTIS15919
ZFMK-TIS-15921	Araneae	Gnaphosidae	Drassodes cupreus	female	adult	Austria		Hohe Tauern. Salzburg	12.73	47.12	21.9.2012	Freudenschuss. M.	Muster. C.	ethanol 96%	ZFMKTIS15921
ZFMK-TIS-15922	Araneae	Lycosidae	Pardosa riparia	female	adult	Austria		Hohe Tauern. Kärnten	12.82	47.14	22.9.2012	Freudenschuss. M.	Freudenschuss. M.	ethanol 96%	ZFMKTIS15922
ZFMK-TIS-15924	Araneae	Linyphiidae	Araeoncus anguineus	male	adult	Austria		Hohe Tauern. Salzburg	12.73	47.12	21.9.2012	Freudenschuss. M.	Freudenschuss. M.	ethanol 96%	ZFMKTIS15924
ZFMK-TIS-15925	Araneae	Lycosidae	Pardosa giebeli	female	adult	Austria		Hohe Tauern. Salzburg	12.73	47.09	22.9.2012	Freudenschuss. M.	Huber. B.A.	ethanol 96%	ZFMKTIS15925
ZFMK-TIS-15926	Araneae	Tetragnathidae	Metellina segmentata	female	adult	Austria		St. Valentin. Niederösterreich	14.5	48.19	15.9.2012	Freudenschuss. M.	Freudenschuss. M.	ethanol 96%	ZFMKTIS15926
ZFMK-TIS-15927	Araneae	Gnaphosidae	Gnaphosa petrobia	female	adult	Austria		Hohe Tauern. Salzburg	12.73	47.09	22.9.2012	Freudenschuss. M.	Freudenschuss. M.	ethanol 96%	ZFMKTIS15927
ZFMK-TIS-15929	Araneae	Theridiidae	Steatoda bipunctata	male	adult	Austria		St. Valentin. Niederösterreich	14.5	48.19	8.9.2012	Freudenschuss. M.	Freudenschuss. M.	ethanol 96%	ZFMKTIS15929
ZFMK-TIS-15931	Araneae	Gnaphosidae	Gnaphosa petrobia	female	adult	Austria		Hohe Tauern. Salzburg	12.73	47.09	21.9.2012	Freudenschuss. M.	Freudenschuss. M.	ethanol 96%	ZFMKTIS15931
ZFMK-TIS-15932	Araneae	Agelenidae	Eratigena agrestis	female	adult	Austria		St. Valentin. Niederösterreich	14.5	48.19	5.9.2012	Freudenschuss. M.	Huber. B.A.	ethanol 96%	ZFMKTIS15932
ZFMK-TIS-15935	Araneae	Lycosidae	Arctosa alpigena	female	adult	Austria		Hohe Tauern. Salzburg	12.73	47.12	21.9.2012	Freudenschuss. M.	Freudenschuss. M.	ethanol 96%	ZFMKTIS15935
ZFMK-TIS-15936	Araneae	Theridiidae	Steatoda bipunctata	male	adult	Austria		Hohe Tauern. Salzburg	12.73	47.12	21.9.2012	Freudenschuss. M.	Freudenschuss. M.	ethanol 96%	ZFMKTIS15936
ZFMK-TIS-15937	Araneae	Lycosidae	Arctosa alpigena	female	adult	Austria		Hohe Tauern. Salzburg	12.73	47.12	21.9.2012	Freudenschuss. M.	Freudenschuss. M.	ethanol 96%	ZFMKTIS15937
ZFMK-TIS-15938	Araneae	Thomisidae	Misumena vatia	female	adult	Austria		St. Valentin. Niederösterreich	14.5	48.19	5.9.2012	Freudenschuss. M.	Freudenschuss. M.	ethanol 96%	ZFMKTIS15938
ZFMK-TIS-15939	Araneae	Gnaphosidae	Gnaphosa petrobia	female	adult	Austria		Hohe Tauern. Salzburg	12.73	47.09	21.9.2012	Freudenschuss. M.	Freudenschuss. M.	ethanol 96%	ZFMKTIS15939
ZFMK-TIS-16988	Araneae	Dictynidae	Dictyna civica	female	adult	Austria		St. Valentin. Niederösterreich	14.42	48.2	25.5.2012	Freudenschuss. M.	Freudenschuss. M.	ethanol 96%	ZFMKTIS16988
ZFMK-TIS-16990	Araneae	Lycosidae	Pardosa morosa	male	adult	Austria		Reichraming	14.46	47.87	18.5.2012	Freudenschuss. M.	Freudenschuss. M.	ethanol 96%	ZFMKTIS16990
ZFMK-TIS-16991	Araneae	Salticidae	Sitticus penicillatus	male	adult	Austria		St. Valentin. Niederösterreich	14.51	48.19	17.5.2012	Freudenschuss. M.	Freudenschuss. M.	ethanol 96%	ZFMKTIS16991
ZFMK-TIS-16992	Araneae	Salticidae	Sitticus penicillatus	male	adult	Austria		St. Valentin. Niederösterreich	14.51	48.19	17.5.2012	Freudenschuss. M.	Freudenschuss. M.	ethanol 96%	ZFMKTIS16992
ZFMK-TIS-18324	Araneae	Linyphiidae	Walckenaeria cuspidata	male	adult	Germany	Mecklenburg-Vorpommern	Rügen	13.42	54.34	5.5.2013	Muster. C.	Muster. C.	ethanol 96%	ZFMKTIS18324
ZFMK-TIS-18325	Araneae	Lycosidae	Pardosa agrestis	male	adult	Germany	Mecklenburg-Vorpommern	Rügen	13.21	54.47	6.5.2013	Muster. C.	Muster. C.	ethanol 96%	ZFMKTIS18325
ZFMK-TIS-18326	Araneae	Lycosidae	Pardosa pullata	female	adult	Germany	Mecklenburg-Vorpommern	Rügen	13.21	54.47	6.5.2013	Muster. C.	Muster. C.	ethanol 96%	ZFMKTIS18326
ZFMK-TIS-18327	Araneae	Linyphiidae	Bathyphantes gracilis	male	adult	Germany	Mecklenburg-Vorpommern	Rügen	13.21	54.47	6.5.2013	Muster. C.	Muster. C.	ethanol 96%	ZFMKTIS18327
ZFMK-TIS-18328	Araneae	Linyphiidae	Silometopus reussi	male	adult	Germany	Mecklenburg-Vorpommern	Rügen	13.21	54.47	6.5.2013	Muster. C.	Muster. C.	ethanol 96%	ZFMKTIS18328
ZFMK-TIS-18329	Araneae	Linyphiidae	Diplostyla concolor	female	adult	Germany	Mecklenburg-Vorpommern	Rügen	13.21	54.47	6.5.2013	Muster. C.	Muster. C.	ethanol 96%	ZFMKTIS18329
ZFMK-TIS-18330	Araneae	Tetragnathidae	Pachygnatha degeeri	female	adult	Germany	Mecklenburg-Vorpommern	Rügen	13.21	54.47	6.5.2013	Muster. C.	Muster. C.	ethanol 96%	ZFMKTIS18330
ZFMK-TIS-18331	Araneae	Linyphiidae	Kaestneria pullata	male	adult	Germany	Mecklenburg-Vorpommern	Rügen	13.21	54.47	6.5.2013	Muster. C.	Muster. C.	ethanol 96%	ZFMKTIS18331
ZFMK-TIS-18332	Araneae	Linyphiidae	Hypomma fulvum	female	adult	Germany	Mecklenburg-Vorpommern	Rügen	13.21	54.47	6.5.2013	Muster. C.	Muster. C.	ethanol 96%	ZFMKTIS18332
ZFMK-TIS-18333	Araneae	Linyphiidae	Walckenaeria kochi	female	adult	Germany	Mecklenburg-Vorpommern	Rügen	13.21	54.47	6.5.2013	Muster. C.	Muster. C.	ethanol 96%	ZFMKTIS18333
ZFMK-TIS-18334	Araneae	Linyphiidae	Walckenaeria vigilax	female	adult	Germany	Mecklenburg-Vorpommern	Rügen	13.21	54.47	6.5.2013	Muster. C.	Muster. C.	ethanol 96%	ZFMKTIS18334
ZFMK-TIS-18335	Araneae	Linyphiidae	Dicymbium nigrum	male	adult	Germany	Mecklenburg-Vorpommern	Rügen	13.21	54.47	6.5.2013	Muster. C.	Muster. C.	ethanol 96%	ZFMKTIS18335
ZFMK-TIS-18336	Araneae	Tetragnathidae	Pachygnatha clercki	female	adult	Germany	Mecklenburg-Vorpommern	Rügen	13.21	54.47	6.5.2013	Muster. C.	Muster. C.	ethanol 96%	ZFMKTIS18336
ZFMK-TIS-18337	Araneae	Linyphiidae	Hypomma bituberculatum	male	adult	Germany	Mecklenburg-Vorpommern	Rügen	13.21	54.47	6.5.2013	Muster. C.	Muster. C.	ethanol 96%	ZFMKTIS18337
ZFMK-TIS-18338	Araneae	Linyphiidae	Erigone longipalpis	male	adult	Germany	Mecklenburg-Vorpommern	Rügen	13.21	54.47	6.5.2013	Muster. C.	Muster. C.	ethanol 96%	ZFMKTIS18338
ZFMK-TIS-18339	Araneae	Linyphiidae	Erigone dentipalpis	male	adult	Germany	Mecklenburg-Vorpommern	Rügen	13.42	54.34	7.5.2013	Muster. C.	Krammer. H.-J.	ethanol 96%	ZFMKTIS18339
ZFMK-TIS-18340	Araneae	Lycosidae	Pardosa saltans	male	adult	Germany	Mecklenburg-Vorpommern	Rügen	13.32	54.33	10.5.2013	Muster. C.	Blick. T.	ethanol 96%	ZFMKTIS18340
ZFMK-TIS-18341	Araneae	Linyphiidae	Ceratinella scabrosa	female	adult	Germany	Mecklenburg-Vorpommern	Rügen	13.32	54.33	10.5.2013	Muster. C.	Muster. C.	ethanol 96%	ZFMKTIS18341
ZFMK-TIS-18342	Araneae	Linyphiidae	Diplocephalus picinus	male	adult	Germany	Mecklenburg-Vorpommern	Rügen	13.32	54.33	10.5.2013	Muster. C.	Muster. C.	ethanol 96%	ZFMKTIS18342
ZFMK-TIS-18343	Araneae	Clubionidae	Clubiona pallidula	male	adult	Germany	Mecklenburg-Vorpommern	Rügen	13.42	54.34	9.5.2013	Muster. C.	Muster. C.	ethanol 96%	ZFMKTIS18343
ZFMK-TIS-18344	Araneae	Salticidae	Salticus scenicus	male	adult	Germany	Mecklenburg-Vorpommern	Rügen	13.42	54.34	9.5.2013	Muster. C.	Muster. C.	ethanol 96%	ZFMKTIS18344
ZFMK-TIS-18348	Araneae	Linyphiidae	Erigonella hiemalis	female	adult	Germany	Mecklenburg-Vorpommern	Rügen	13.38	54.68	12.5.2013	Muster. C.	Muster. C.	ethanol 96%	ZFMKTIS18348
ZFMK-TIS-18349	Araneae	Linyphiidae	Dicymbium tibiale	male	adult	Germany	Mecklenburg-Vorpommern	Rügen	13.38	54.68	12.5.2013	Muster. C.	Muster. C.	ethanol 96%	ZFMKTIS18349
ZFMK-TIS-18350	Araneae	Theridiidae	Robertus lividus	male	adult	Germany	Mecklenburg-Vorpommern	Rügen	13.38	54.68	12.5.2013	Muster. C.	Muster. C.	ethanol 96%	ZFMKTIS18350
ZFMK-TIS-18351	Araneae	Linyphiidae	Minyriolus pusillus	male	adult	Germany	Mecklenburg-Vorpommern	Rügen	13.38	54.68	12.5.2013	Muster. C.	Muster. C.	ethanol 96%	ZFMKTIS18351
ZFMK-TIS-18353	Araneae	Lycosidae	Pardosa agrestis	male	adult	Germany	Mecklenburg-Vorpommern	Rügen	13.38	54.68	12.5.2013	Muster. C.	Muster. C.	ethanol 96%	ZFMKTIS18353
ZFMK-TIS-18354	Araneae	Linyphiidae	Walckenaeria unicornis	female	adult	Germany	Mecklenburg-Vorpommern	Rügen	13.38	54.68	12.5.2013	Muster. C.	Muster. C.	ethanol 96%	ZFMKTIS18354
ZFMK-TIS-18355	Araneae	Lycosidae	Pardosa palustris	female	adult	Germany	Mecklenburg-Vorpommern	Rügen	13.45	54.32	15.5.2013	Muster. C.	Muster. C.	ethanol 96%	ZFMKTIS18355
ZFMK-TIS-18356	Araneae	Linyphiidae	Linyphia hortensis	male	adult	Germany	Mecklenburg-Vorpommern	Rügen	13.42	54.34	16.5.2013	Muster. C.	Muster. C.	ethanol 96%	ZFMKTIS18356
ZFMK-TIS-18357	Araneae	Salticidae	Euophrys frontalis	male	adult	Germany	Mecklenburg-Vorpommern	Rügen	13.42	54.34	19.5.2013	Muster. C.	Muster. C.	ethanol 96%	ZFMKTIS18357
ZFMK-TIS-18358	Araneae	Thomisidae	Xysticus ulmi	male	adult	Germany	Mecklenburg-Vorpommern	Rügen	13.42	54.34	27.5.2013	Muster. C.	Muster. C.	ethanol 96%	ZFMKTIS18358
ZFMK-TIS-18359	Araneae	Lycosidae	Arctosa leopardus	male	adult	Germany	Mecklenburg-Vorpommern	Recknitz-Trebeltal	13.75	54.1	23.5.2013	Muster. C.	Muster. C.	ethanol 96%	ZFMKTIS18359
ZFMK-TIS-18360	Araneae	Tetragnathidae	Tetragnatha montana	male	adult	Germany	Mecklenburg-Vorpommern	Recknitz-Trebeltal	13.75	54.1	23.5.2013	Muster. C.	Muster. C.	ethanol 96%	ZFMKTIS18360
ZFMK-TIS-18361	Araneae	Tetragnathidae	Tetragnatha extensa	male	adult	Germany	Mecklenburg-Vorpommern	Recknitz-Trebeltal	13.75	54.1	23.5.2013	Muster. C.	Muster. C.	ethanol 96%	ZFMKTIS18361
ZFMK-TIS-18362	Araneae	Lycosidae	Pardosa prativaga	male	adult	Germany	Mecklenburg-Vorpommern	Recknitz-Trebeltal	13.75	54.1	23.5.2013	Muster. C.	Muster. C.	ethanol 96%	ZFMKTIS18362
ZFMK-TIS-18363	Araneae	Lycosidae	Piratula hygrophila	male	adult	Germany	Mecklenburg-Vorpommern	Recknitz-Trebeltal	13.75	54.1	23.5.2013	Muster. C.	Muster. C.	ethanol 96%	ZFMKTIS18363
ZFMK-TIS-18364	Araneae	Lycosidae	Pirata piraticus	female	adult	Germany	Mecklenburg-Vorpommern	Recknitz-Trebeltal	13.75	54.1	23.5.2013	Muster. C.	Muster. C.	ethanol 96%	ZFMKTIS18364
ZFMK-TIS-18365	Araneae	Araneidae	Hypsosinga heri	female	adult	Germany	Mecklenburg-Vorpommern	Recknitz-Trebeltal	13.75	54.1	23.5.2013	Muster. C.	Muster. C.	ethanol 96%	ZFMKTIS18365
ZFMK-TIS-18366	Araneae	Araneidae	Singa hamata	male	adult	Germany	Mecklenburg-Vorpommern	Recknitz-Trebeltal	13.75	54.1	23.5.2013	Muster. C.	Muster. C.	ethanol 96%	ZFMKTIS18366
ZFMK-TIS-18367	Araneae	Clubionidae	Clubiona reclusa	female	adult	Germany	Mecklenburg-Vorpommern	Recknitz-Trebeltal	13.75	54.1	23.5.2013	Muster. C.	Muster. C.	ethanol 96%	ZFMKTIS18367
ZFMK-TIS-18368	Araneae	Linyphiidae	Microlinyphia impigra	female	adult	Germany	Mecklenburg-Vorpommern	Recknitz-Trebeltal	13.75	54.1	23.5.2013	Muster. C.	Muster. C.	ethanol 96%	ZFMKTIS18368
ZFMK-TIS-18369	Araneae	Linyphiidae	Savignia frontata	male	adult	Germany	Mecklenburg-Vorpommern	Recknitz-Trebeltal	13.75	54.1	23.5.2013	Muster. C.	Muster. C.	ethanol 96%	ZFMKTIS18369
ZFMK-TIS-18370	Araneae	Linyphiidae	Gnathonarium dentatum	female	adult	Germany	Mecklenburg-Vorpommern	Recknitz-Trebeltal	13.75	54.1	23.5.2013	Muster. C.	Muster. C.	ethanol 96%	ZFMKTIS18370
ZFMK-TIS-18371	Araneae	Linyphiidae	Araeoncus humilis	male	adult	Germany	Mecklenburg-Vorpommern	Recknitz-Trebeltal	13.75	54.1	23.5.2013	Muster. C.	Muster. C.	ethanol 96%	ZFMKTIS18371
ZFMK-TIS-18372	Araneae	Linyphiidae	Dismodicus bifrons	female	adult	Germany	Mecklenburg-Vorpommern	Recknitz-Trebeltal	13.75	54.1	23.5.2013	Muster. C.	Muster. C.	ethanol 96%	ZFMKTIS18372
ZFMK-TIS-18373	Araneae	Clubionidae	Clubiona lutescens	male	adult	Germany	Mecklenburg-Vorpommern	Recknitz-Trebeltal	13.75	54.1	23.5.2013	Muster. C.	Muster. C.	ethanol 96%	ZFMKTIS18373
ZFMK-TIS-18375	Araneae	Linyphiidae	Taranucnus setosus	female	adult	Germany	Mecklenburg-Vorpommern	Recknitz-Trebeltal	13.75	54.1	23.5.2013	Muster. C.	Muster. C.	ethanol 96%	ZFMKTIS18375
ZFMK-TIS-18376	Araneae	Theridiidae	Robertus arundineti	male	adult	Germany	Mecklenburg-Vorpommern	Recknitz-Trebeltal	13.75	54.1	23.5.2013	Muster. C.	Muster. C.	ethanol 96%	ZFMKTIS18376
ZFMK-TIS-18377	Araneae	Amaurobiidae	Amaurobius similis	female	adult	Germany	Niedersachsen	Deinste	9.46	53.53	24.5.2013	Muster. C.	Muster. C.	ethanol 96%	ZFMKTIS18377
ZFMK-TIS-18378	Araneae	Theridiidae	Robertus lividus	female	adult	Germany	Niedersachsen	Deinste	9.46	53.53	24.5.2013	Muster. C.	Muster. C.	ethanol 96%	ZFMKTIS18378
ZFMK-TIS-18379	Araneae	Theridiidae	Enoplognatha thoracica	male	adult	Germany	Niedersachsen	Deinste	9.46	53.53	24.5.2013	Muster. C.	Muster. C.	ethanol 96%	ZFMKTIS18379
ZFMK-TIS-18380	Araneae	Lycosidae	Piratula hygrophila	female	adult	Germany	Niedersachsen	Deinste	9.46	53.53	24.5.2013	Muster. C.	Muster. C.	ethanol 96%	ZFMKTIS18380
ZFMK-TIS-18381	Araneae	Lycosidae	Pardosa lugubris	male	adult	Germany	Niedersachsen	Deinste	9.46	53.53	24.5.2013	Muster. C.	Blick. T.	ethanol 96%	ZFMKTIS18381
ZFMK-TIS-18382	Araneae	Linyphiidae	Gnathonarium dentatum	male	adult	Germany	Niedersachsen	Deinste	9.46	53.53	24.5.2013	Muster. C.	Muster. C.	ethanol 96%	ZFMKTIS18382
ZFMK-TIS-18383	Araneae	Linyphiidae	Tiso vagans	female	adult	Germany	Niedersachsen	Deinste	9.46	53.53	24.5.2013	Muster. C.	Muster. C.	ethanol 96%	ZFMKTIS18383
ZFMK-TIS-18384	Araneae	Linyphiidae	Microneta viaria	female	adult	Germany	Niedersachsen	Deinste	9.46	53.53	24.5.2013	Muster. C.	Muster. C.	ethanol 96%	ZFMKTIS18384
ZFMK-TIS-18385	Araneae	Linyphiidae	Tenuiphantes flavipes	female	adult	Germany	Niedersachsen	Deinste	9.46	53.53	24.5.2013	Muster. C.	Muster. C.	ethanol 96%	ZFMKTIS18385
ZFMK-TIS-18386	Araneae	Linyphiidae	Diplostyla concolor	female	adult	Germany	Niedersachsen	Deinste	9.46	53.53	24.5.2013	Muster. C.	Muster. C.	ethanol 96%	ZFMKTIS18386
ZFMK-TIS-18387	Araneae	Linyphiidae	Diplocephalus picinus	female	adult	Germany	Niedersachsen	Deinste	9.46	53.53	24.5.2013	Muster. C.	Muster. C.	ethanol 96%	ZFMKTIS18387
ZFMK-TIS-18388	Araneae	Linyphiidae	Troxochrus scabriculus	male	adult	Germany	Niedersachsen	Deinste	9.46	53.53	24.5.2013	Muster. C.	Muster. C.	ethanol 96%	ZFMKTIS18388
ZFMK-TIS-18389	Araneae	Linyphiidae	Maso sundevalli	female	adult	Germany	Niedersachsen	Deinste	9.46	53.53	24.5.2013	Muster. C.	Muster. C.	ethanol 96%	ZFMKTIS18389
ZFMK-TIS-18390	Araneae	Dictynidae	Dictyna uncinata	female	adult	Germany	Niedersachsen	Deinste	9.46	53.53	24.5.2013	Muster. C.	Muster. C.	ethanol 96%	ZFMKTIS18390
ZFMK-TIS-18391	Araneae	Agelenidae	Textrix denticulata	male	adult	Germany	Mecklenburg-Vorpommern	Rügen	13.42	54.34	2.6.2013	Muster. C.	Muster. C.	ethanol 96%	ZFMKTIS18391
ZFMK-TIS-18392	Araneae	Pisauridae	Dolomedes fimbriatus	male	adult	Germany	Sachsen	Dübener Heide	12.7	51.58	31.5.2013	Muster. C.	Muster. C.	ethanol 96%	ZFMKTIS18392
ZFMK-TIS-18393	Araneae	Pisauridae	Dolomedes fimbriatus	female	adult	Germany	Sachsen	Dübener Heide	12.7	51.58	31.5.2013	Muster. C.	Muster. C.	ethanol 96%	ZFMKTIS18393
ZFMK-TIS-18394	Araneae	Tetragnathidae	Tetragnatha montana	female	adult	Germany	Sachsen	Dübener Heide	12.7	51.58	31.5.2013	Muster. C.	Muster. C.	ethanol 96%	ZFMKTIS18394
ZFMK-TIS-18396	Araneae	Lycosidae	Piratula latitans	male	adult	Germany	Sachsen	Dübener Heide	12.7	51.58	31.5.2013	Muster. C.	Muster. C.	ethanol 96%	ZFMKTIS18396
ZFMK-TIS-18397	Araneae	Lycosidae	Pardosa prativaga	male	adult	Germany	Sachsen	Dübener Heide	12.7	51.58	31.5.2013	Muster. C.	Muster. C.	ethanol 96%	ZFMKTIS18397
ZFMK-TIS-18398	Araneae	Lycosidae	Pardosa palustris	male	adult	Germany	Sachsen	Dübener Heide	12.7	51.58	31.5.2013	Muster. C.	Muster. C.	ethanol 96%	ZFMKTIS18398
ZFMK-TIS-18399	Araneae	Lycosidae	Alopecosa pulverulenta	female	adult	Germany	Sachsen	Dübener Heide	12.7	51.58	31.5.2013	Muster. C.	Krammer. H.-J.	ethanol 96%	ZFMKTIS18399
ZFMK-TIS-18400	Araneae	Lycosidae	Alopecosa cuneata	female	adult	Germany	Sachsen	Dübener Heide	12.7	51.58	31.5.2013	Muster. C.	Blick. T.	ethanol 96%	ZFMKTIS18400
ZFMK-TIS-18401	Araneae	Araneidae	Mangora acalypha	female	adult	Germany	Sachsen	Dübener Heide	12.7	51.58	31.5.2013	Muster. C.	Muster. C.	ethanol 96%	ZFMKTIS18401
ZFMK-TIS-18402	Araneae	Lycosidae	Pirata piscatorius	female	adult	Germany	Sachsen	Dübener Heide	12.7	51.58	31.5.2013	Muster. C.	Muster. C.	ethanol 96%	ZFMKTIS18402
ZFMK-TIS-18403	Araneae	Lycosidae	Arctosa leopardus	male	adult	Germany	Sachsen	Dübener Heide	12.7	51.58	31.5.2013	Muster. C.	Muster. C.	ethanol 96%	ZFMKTIS18403
ZFMK-TIS-18405	Araneae	Tetragnathidae	Metellina merianae	female	adult	Germany	Sachsen	Dübener Heide	12.7	51.58	31.5.2013	Muster. C.	Muster. C.	ethanol 96%	ZFMKTIS18405
ZFMK-TIS-18406	Araneae	Linyphiidae	Hypomma bituberculatum	female	adult	Germany	Sachsen	Dübener Heide	12.7	51.58	31.5.2013	Muster. C.	Muster. C.	ethanol 96%	ZFMKTIS18406
ZFMK-TIS-18407	Araneae	Philodromidae	Philodromus dispar	male	adult	Germany	Sachsen	Dübener Heide	12.7	51.58	31.5.2013	Muster. C.	Muster. C.	ethanol 96%	ZFMKTIS18407
ZFMK-TIS-18409	Araneae	Linyphiidae	Neriene radiata	female	adult	Germany	Sachsen	Dübener Heide	12.7	51.58	31.5.2013	Muster. C.	Muster. C.	ethanol 96%	ZFMKTIS18409
ZFMK-TIS-18410	Araneae	Philodromidae	Tibellus oblongus	male	adult	Germany	Sachsen	Dübener Heide	12.7	51.58	31.5.2013	Muster. C.	Muster. C.	ethanol 96%	ZFMKTIS18410
ZFMK-TIS-18411	Araneae	Araneidae	Larinioides cornutus	female	adult	Germany	Sachsen	Dübener Heide	12.7	51.58	31.5.2013	Muster. C.	Muster. C.	ethanol 96%	ZFMKTIS18411
ZFMK-TIS-18412	Araneae	Liocranidae	Agroeca brunnea	female	adult	Germany	Sachsen	Dübener Heide	12.7	51.58	31.5.2013	Muster. C.	Muster. C.	ethanol 96%	ZFMKTIS18412
ZFMK-TIS-18413	Araneae	Lycosidae	Hygrolycosa rubrofasciata	female	adult	Germany	Sachsen	Dübener Heide	12.7	51.58	31.5.2013	Muster. C.	Muster. C.	ethanol 96%	ZFMKTIS18413
ZFMK-TIS-18414	Araneae	Salticidae	Evarcha falcata	female	adult	Germany	Sachsen	Dübener Heide	12.7	51.58	31.5.2013	Muster. C.	Muster. C.	ethanol 96%	ZFMKTIS18414
ZFMK-TIS-18415	Araneae	Salticidae	Neon reticulatus	female	adult	Germany	Sachsen	Dübener Heide	12.7	51.58	31.5.2013	Muster. C.	Muster. C.	ethanol 96%	ZFMKTIS18415
ZFMK-TIS-18416	Araneae	Araneidae	Cercidia prominens	female	juvenile	Germany	Sachsen	Dübener Heide	12.7	51.58	31.5.2013	Muster. C.	Muster. C.	ethanol 96%	ZFMKTIS18416
ZFMK-TIS-18417	Araneae	Theridiidae	Platnickina tincta	female	adult	Germany	Sachsen	Dübener Heide	12.7	51.58	31.5.2013	Muster. C.	Muster. C.	ethanol 96%	ZFMKTIS18417
ZFMK-TIS-18418	Araneae	Theridiidae	Parasteatoda lunata	female	adult	Germany	Sachsen	Dübener Heide	12.7	51.58	31.5.2013	Muster. C.	Muster. C.	ethanol 96%	ZFMKTIS18418
ZFMK-TIS-18419	Araneae	Theridiidae	Simitidion simile	male	adult	Germany	Sachsen	Dübener Heide	12.7	51.58	31.5.2013	Muster. C.	Muster. C.	ethanol 96%	ZFMKTIS18419
ZFMK-TIS-18420	Araneae	Phrurolithidae	Phrurolithus festivus	male	adult	Germany	Sachsen	Dübener Heide	12.7	51.58	31.5.2013	Muster. C.	Muster. C.	ethanol 96%	ZFMKTIS18420
ZFMK-TIS-18421	Araneae	Dictynidae	Dictyna arundinacea		adult	Germany	Sachsen	Dübener Heide	12.7	51.58	31.5.2013	Muster. C.	Muster. C.	ethanol 96%	ZFMKTIS18421
ZFMK-TIS-18422	Araneae	Lycosidae	Aulonia albimana	female	adult	Germany	Sachsen	Dübener Heide	12.7	51.58	31.5.2013	Muster. C.	Muster. C.	ethanol 96%	ZFMKTIS18422
ZFMK-TIS-18423	Araneae	Thomisidae	Xysticus luctuosus	male	adult	Germany	Sachsen	Dübener Heide	12.7	51.58	31.5.2013	Muster. C.	Muster. C.	ethanol 96%	ZFMKTIS18423
ZFMK-TIS-18424	Araneae	Linyphiidae	Walckenaeria dysderoides	male	adult	Germany	Sachsen	Dübener Heide	12.7	51.58	31.5.2013	Muster. C.	Muster. C.	ethanol 96%	ZFMKTIS18424
ZFMK-TIS-18426	Araneae	Hahniidae	Hahnia ononidum	male	adult	Germany	Sachsen	Dübener Heide	12.7	51.58	31.5.2013	Muster. C.	Muster. C.	ethanol 96%	ZFMKTIS18426
ZFMK-TIS-18427	Araneae	Linyphiidae	Hypomma cornutum	male	adult	Germany	Mecklenburg-Vorpommern	Rügen	13.42	54.34	8.6.2013	Muster. C.	Muster. C.	ethanol 96%	ZFMKTIS18427
ZFMK-TIS-18428	Araneae	Linyphiidae	Obscuriphantes obscurus	male	adult	Germany	Mecklenburg-Vorpommern	Rügen	13.42	54.34	8.6.2013	Muster. C.	Muster. C.	ethanol 96%	ZFMKTIS18428
ZFMK-TIS-18429	Araneae	Theridiidae	Neottiura bimaculata	female	adult	Germany	Mecklenburg-Vorpommern	Rügen	13.42	54.34	8.6.2013	Muster. C.	Muster. C.	ethanol 96%	ZFMKTIS18429
ZFMK-TIS-18430	Araneae	Linyphiidae	Kaestneria dorsalis	female	adult	Germany	Mecklenburg-Vorpommern	Rügen	13.42	54.34	8.6.2013	Muster. C.	Muster. C.	ethanol 96%	ZFMKTIS18430
ZFMK-TIS-18431	Opiliones	Phalangiidae	Rilaena triangularis	female	adult	Germany	Mecklenburg-Vorpommern	Rügen	13.42	54.34	8.6.2013	Muster. C.	Muster. C.	ethanol 96%	ZFMKTIS18431
ZFMK-TIS-18432	Araneae	Linyphiidae	Hylyphantes graminicola	male	adult	Germany	Mecklenburg-Vorpommern	Rügen	13.42	54.34	8.6.2013	Muster. C.	Muster. C.	ethanol 96%	ZFMKTIS18432
ZFMK-TIS-18433	Araneae	Theridiidae	Theridion varians	female	adult	Germany	Mecklenburg-Vorpommern	Rügen	13.42	54.34	8.6.2013	Muster. C.	Muster. C.	ethanol 96%	ZFMKTIS18433
ZFMK-TIS-18434	Araneae	Linyphiidae	Entelecara acuminata	female	adult	Germany	Mecklenburg-Vorpommern	Rügen	13.42	54.34	8.6.2013	Muster. C.	Muster. C.	ethanol 96%	ZFMKTIS18434
ZFMK-TIS-18435	Araneae	Theridiidae	Anelosimus vittatus	male	adult	Germany	Mecklenburg-Vorpommern	Rügen	13.42	54.34	8.6.2013	Muster. C.	Muster. C.	ethanol 96%	ZFMKTIS18435
ZFMK-TIS-18436	Araneae	Philodromidae	Philodromus aureolus	male	adult	Germany	Mecklenburg-Vorpommern	Rügen	13.42	54.34	8.6.2013	Muster. C.	Muster. C.	ethanol 96%	ZFMKTIS18436
ZFMK-TIS-18437	Araneae	Philodromidae	Philodromus collinus	male	adult	Germany	Mecklenburg-Vorpommern	Rügen	13.42	54.34	8.6.2013	Muster. C.	Muster. C.	ethanol 96%	ZFMKTIS18437
ZFMK-TIS-18438	Araneae	Linyphiidae	Dismodicus bifrons	female	adult	Germany	Mecklenburg-Vorpommern	Rügen	13.42	54.34	8.6.2013	Muster. C.	Muster. C.	ethanol 96%	ZFMKTIS18438
ZFMK-TIS-18439	Araneae	Lycosidae	Pardosa lugubris	male	adult	Germany	Mecklenburg-Vorpommern	Rügen	13.43	54.34	11.6.2013	Muster. C.	Muster. C.	ethanol 96%	ZFMKTIS18439
ZFMK-TIS-18440	Araneae	Theridiidae	Simitidion simile	female	adult	Germany	Sachsen	Dübener Heide	12.7	51.58	31.5.2013	Muster. C.	Muster. C.	ethanol 96%	ZFMKTIS18440
ZFMK-TIS-18441	Araneae	Dictynidae	Dictyna arundinacea	female	adult	Germany	Sachsen	Dübener Heide	12.7	51.58	31.5.2013	Muster. C.	Muster. C.	ethanol 96%	ZFMKTIS18441
ZFMK-TIS-18442	Araneae	Anyphaenidae	Anyphaena accentuata	female	adult	Germany	Niedersachsen	Deinste	9.46	53.53	16.6.2013	Muster. C.	Muster. C.	ethanol 96%	ZFMKTIS18442
ZFMK-TIS-18443	Araneae	Theridiidae	Phylloneta impressa	male	adult	Germany	Niedersachsen	Deinste	9.46	53.53	16.6.2013	Muster. C.	Muster. C.	ethanol 96%	ZFMKTIS18443
ZFMK-TIS-18444	Araneae	Theridiidae	Phylloneta impressa	male	adult	Germany	Niedersachsen	Deinste	9.46	53.53	16.6.2013	Muster. C.	Muster. C.	ethanol 96%	ZFMKTIS18444
ZFMK-TIS-18445	Araneae	Theridiidae	Theridion varians	female	adult	Germany	Niedersachsen	Deinste	9.46	53.53	16.6.2013	Muster. C.	Muster. C.	ethanol 96%	ZFMKTIS18445
ZFMK-TIS-18446	Araneae	Theridiidae	Theridion varians	female	adult	Germany	Niedersachsen	Deinste	9.46	53.53	16.6.2013	Muster. C.	Muster. C.	ethanol 96%	ZFMKTIS18446
ZFMK-TIS-18447	Araneae	Clubionidae	Clubiona brevipes	female	adult	Germany	Niedersachsen	Deinste	9.46	53.53	16.6.2013	Muster. C.	Muster. C.	ethanol 96%	ZFMKTIS18447
ZFMK-TIS-18448	Araneae	Araneidae	Mangora acalypha	male	adult	Germany	Niedersachsen	Deinste	9.46	53.53	16.6.2013	Muster. C.	Muster. C.	ethanol 96%	ZFMKTIS18448
ZFMK-TIS-18449	Araneae	Araneidae	Mangora acalypha	female	adult	Germany	Niedersachsen	Deinste	9.46	53.53	16.6.2013	Muster. C.	Muster. C.	ethanol 96%	ZFMKTIS18449
ZFMK-TIS-18450	Araneae	Theridiidae	Neottiura bimaculata	male	adult	Germany	Niedersachsen	Deinste	9.46	53.53	16.6.2013	Muster. C.	Muster. C.	ethanol 96%	ZFMKTIS18450
ZFMK-TIS-18451	Araneae	Theridiidae	Enoplognatha ovata	male	adult	Germany	Niedersachsen	Deinste	9.46	53.53	16.6.2013	Muster. C.	Muster. C.	ethanol 96%	ZFMKTIS18451
ZFMK-TIS-18452	Araneae	Araneidae	Araniella opisthographa	male	adult	Germany	Niedersachsen	Deinste	9.46	53.53	16.6.2013	Muster. C.	Muster. C.	ethanol 96%	ZFMKTIS18452
ZFMK-TIS-18453	Araneae	Araneidae	Araniella opisthographa	female	adult	Germany	Niedersachsen	Deinste	9.46	53.53	16.6.2013	Muster. C.	Muster. C.	ethanol 96%	ZFMKTIS18453
ZFMK-TIS-18454	Araneae	Tetragnathidae	Tetragnatha montana	male	adult	Germany	Niedersachsen	Deinste	9.46	53.53	16.6.2013	Muster. C.	Muster. C.	ethanol 96%	ZFMKTIS18454
ZFMK-TIS-18455	Araneae	Tetragnathidae	Tetragnatha pinicola	male	adult	Germany	Niedersachsen	Deinste	9.46	53.53	16.6.2013	Muster. C.	Muster. C.	ethanol 96%	ZFMKTIS18455
ZFMK-TIS-18456	Araneae	Tetragnathidae	Tetragnatha pinicola	male	adult	Germany	Niedersachsen	Deinste	9.46	53.53	16.6.2013	Muster. C.	Muster. C.	ethanol 96%	ZFMKTIS18456
ZFMK-TIS-18457	Araneae	Linyphiidae	Porrhomma pygmaeum	male	adult	Germany	Niedersachsen	Deinste	9.46	53.53	16.6.2013	Muster. C.	Muster. C.	ethanol 96%	ZFMKTIS18457
ZFMK-TIS-18458	Araneae	Dictynidae	Dictyna uncinata	male	adult	Germany	Niedersachsen	Deinste	9.46	53.53	16.6.2013	Muster. C.	Muster. C.	ethanol 96%	ZFMKTIS18458
ZFMK-TIS-18459	Araneae	Theridiidae	Anelosimus vittatus	female	adult	Germany	Niedersachsen	Deinste	9.46	53.53	16.6.2013	Muster. C.	Muster. C.	ethanol 96%	ZFMKTIS18459
ZFMK-TIS-18460	Araneae	Linyphiidae	Agyneta rurestris	female	adult	Germany	Sachsen	Thiendorf	13.73	51.29	1.7.2013	Muster. C.	Huber. B.A.	ethanol 96%	ZFMKTIS18460
ZFMK-TIS-18461	Araneae	Linyphiidae	Agyneta rurestris	female	adult	Germany	Sachsen	Dresdener Heller	13.75	51.1	1.7.2013	Muster. C.	Huber. B.A.	ethanol 96%	ZFMKTIS18461
ZFMK-TIS-18462	Araneae	Anyphaenidae	Anyphaena accentuata	female	adult	Germany	Sachsen	Dresdener Heller	13.75	51.1	1.7.2013	Muster. C.	Muster. C.	ethanol 96%	ZFMKTIS18462
ZFMK-TIS-18463	Araneae	Theridiidae	Episinus angulatus	male	adult	Germany	Sachsen	Dresdener Heller	13.75	51.1	1.7.2013	Muster. C.	Muster. C.	ethanol 96%	ZFMKTIS18463
ZFMK-TIS-18464	Araneae	Clubionidae	Clubiona trivialis	male	adult	Germany	Sachsen	Dresdener Heller	13.75	51.1	1.7.2013	Muster. C.	Muster. C.	ethanol 96%	ZFMKTIS18464
ZFMK-TIS-18465	Araneae	Clubionidae	Clubiona trivialis	male	adult	Germany	Sachsen	Dresdener Heller	13.75	51.1	1.7.2013	Muster. C.	Muster. C.	ethanol 96%	ZFMKTIS18465
ZFMK-TIS-18466	Araneae	Theridiidae	Neottiura bimaculata	female	adult	Germany	Sachsen	Dresdener Heller	13.75	51.1	1.7.2013	Muster. C.	Muster. C.	ethanol 96%	ZFMKTIS18466
ZFMK-TIS-18467	Araneae	Theridiidae	Neottiura bimaculata	female	adult	Germany	Sachsen	Dresdener Heller	13.75	51.1	1.7.2013	Muster. C.	Muster. C.	ethanol 96%	ZFMKTIS18467
ZFMK-TIS-18468	Araneae	Theridiidae	Platnickina tincta	male	adult	Germany	Sachsen	Dresdener Heller	13.75	51.1	1.7.2013	Muster. C.	Muster. C.	ethanol 96%	ZFMKTIS18468
ZFMK-TIS-18469	Araneae	Philodromidae	Philodromus aureolus	female	adult	Germany	Sachsen	Dresdener Heller	13.75	51.1	1.7.2013	Muster. C.	Muster. C.	ethanol 96%	ZFMKTIS18469
ZFMK-TIS-18470	Araneae	Philodromidae	Philodromus collinus	male	adult	Germany	Sachsen	Dresdener Heller	13.75	51.1	1.7.2013	Muster. C.	Muster. C.	ethanol 96%	ZFMKTIS18470
ZFMK-TIS-18471	Araneae	Salticidae	Heliophanus cupreus	male	adult	Germany	Sachsen	Dresdener Heller	13.75	51.1	1.7.2013	Muster. C.	Muster. C.	ethanol 96%	ZFMKTIS18471
ZFMK-TIS-18472	Araneae	Linyphiidae	Oedothorax apicatus	male	adult	Germany	Sachsen	Dresdener Heller	13.75	51.1	1.7.2013	Muster. C.	Muster. C.	ethanol 96%	ZFMKTIS18472
ZFMK-TIS-18473	Araneae	Linyphiidae	Minicia marginella	female	adult	Germany	Sachsen	Dresdener Heller	13.75	51.1	1.7.2013	Muster. C.	Muster. C.	ethanol 96%	ZFMKTIS18473
ZFMK-TIS-18474	Araneae	Lycosidae	Xerolycosa miniata	male	adult	Germany	Sachsen	Dresdener Heller	13.75	51.1	1.7.2013	Muster. C.	Muster. C.	ethanol 96%	ZFMKTIS18474
ZFMK-TIS-18475	Araneae	Salticidae	Phlegra fasciata	female	adult	Germany	Sachsen	Dresdener Heller	13.75	51.1	1.7.2013	Muster. C.	Muster. C.	ethanol 96%	ZFMKTIS18475
ZFMK-TIS-18476	Araneae	Salticidae	Heliophanus flavipes	male	adult	Germany	Sachsen	Dresdener Heller	13.75	51.1	1.7.2013	Muster. C.	Muster. C.	ethanol 96%	ZFMKTIS18476
ZFMK-TIS-18477	Araneae	Salticidae	Heliophanus flavipes	male	adult	Germany	Sachsen	Dresdener Heller	13.75	51.1	1.7.2013	Muster. C.	Muster. C.	ethanol 96%	ZFMKTIS18477
ZFMK-TIS-18478	Araneae	Theridiidae	Phylloneta impressa	male	adult	Germany	Sachsen	Dresdener Heller	13.75	51.1	1.7.2013	Muster. C.	Muster. C.	ethanol 96%	ZFMKTIS18478
ZFMK-TIS-18479	Araneae	Theridiidae	Phylloneta impressa	male	adult	Germany	Sachsen	Dresdener Heller	13.75	51.1	1.7.2013	Muster. C.	Muster. C.	ethanol 96%	ZFMKTIS18479
ZFMK-TIS-18480	Araneae	Theridiidae	Theridion varians	female	adult	Germany	Sachsen	Dresdener Heller	13.75	51.1	1.7.2013	Muster. C.	Muster. C.	ethanol 96%	ZFMKTIS18480
ZFMK-TIS-18481	Araneae	Theridiidae	Theridion pinastri	female	adult	Germany	Sachsen	Dresdener Heller	13.75	51.1	1.7.2013	Muster. C.	Muster. C.	ethanol 96%	ZFMKTIS18481
ZFMK-TIS-18482	Araneae	Thomisidae	Thomisus onustus	male	adult	Germany	Sachsen	Dresdener Heller	13.75	51.1	1.7.2013	Muster. C.	Muster. C.	ethanol 96%	ZFMKTIS18482
ZFMK-TIS-18483	Araneae	Gnaphosidae	Drassyllus pumilus	female	adult	Germany	Sachsen	Dresdener Heller	13.75	51.1	1.7.2013	Muster. C.	Muster. C.	ethanol 96%	ZFMKTIS18483
ZFMK-TIS-18484	Araneae	Araneidae	Neoscona adianta	male	adult	Germany	Sachsen	Dresdener Heller	13.75	51.1	1.7.2013	Muster. C.	Muster. C.	ethanol 96%	ZFMKTIS18484
ZFMK-TIS-18485	Araneae	Araneidae	Neoscona adianta		juvenile	Germany	Sachsen	Dresdener Heller	13.75	51.1	1.7.2013	Muster. C.	Muster. C.	ethanol 96%	ZFMKTIS18485
ZFMK-TIS-18486	Araneae	Lycosidae	Pardosa nigriceps	female	adult	Germany	Sachsen	Dresdener Heller	13.75	51.1	1.7.2013	Muster. C.	Muster. C.	ethanol 96%	ZFMKTIS18486
ZFMK-TIS-18487	Araneae	Clubionidae	Clubiona neglecta	female	adult	Germany	Sachsen	Dresdener Heller	13.75	51.1	1.7.2013	Muster. C.	Muster. C.	ethanol 96%	ZFMKTIS18487
ZFMK-TIS-18488	Araneae	Theridiidae	Lasaeola tristis	male	adult	Germany	Sachsen	Dresdener Heller	13.75	51.1	1.7.2013	Muster. C.	Muster. C.	ethanol 96%	ZFMKTIS18488
ZFMK-TIS-18489	Araneae	Linyphiidae	Metopobactrus prominulus	female	adult	Germany	Sachsen	Dresdener Heller	13.75	51.1	1.7.2013	Muster. C.	Muster. C.	ethanol 96%	ZFMKTIS18489
ZFMK-TIS-18490	Araneae	Araneidae	Cercidia prominens	female	adult	Germany	Sachsen	Dresdener Heller	13.75	51.1	1.7.2013	Muster. C.	Muster. C.	ethanol 96%	ZFMKTIS18490
ZFMK-TIS-18491	Araneae	Linyphiidae	Gongylidiellum latebricola	male	adult	Germany	Sachsen	Dresdener Heller	13.75	51.1	1.7.2013	Muster. C.	Muster. C.	ethanol 96%	ZFMKTIS18491
ZFMK-TIS-18492	Araneae	Linyphiidae	Walckenaeria cucullata	female	adult	Germany	Sachsen	Dresdener Heller	13.75	51.1	1.7.2013	Muster. C.	Muster. C.	ethanol 96%	ZFMKTIS18492
ZFMK-TIS-18493	Araneae	Linyphiidae	Walckenaeria cucullata	female	adult	Germany	Sachsen	Dresdener Heller	13.75	51.1	1.7.2013	Muster. C.	Muster. C.	ethanol 96%	ZFMKTIS18493
ZFMK-TIS-18494	Araneae	Mimetidae	Ero aphana	male	adult	Germany	Sachsen	Dresdener Heller	13.75	51.1	1.7.2013	Muster. C.	Muster. C.	ethanol 96%	ZFMKTIS18494
ZFMK-TIS-18495	Araneae	Philodromidae	Tibellus maritimus	male	adult	Germany	Mecklenburg-Vorpommern	Meschendorf	11.66	54.14	24.6.2013	Muster. C.	Muster. C.	ethanol 96%	ZFMKTIS18495
ZFMK-TIS-18496	Araneae	Linyphiidae	Maso sundevalli	male	adult	Germany	Mecklenburg-Vorpommern	Meschendorf	11.66	54.14	24.6.2013	Muster. C.	Muster. C.	ethanol 96%	ZFMKTIS18496
ZFMK-TIS-18499	Araneae	Philodromidae	Philodromus dispar	male	adult	Germany	Hessen	Edersee	8.93	51.18	15.6.2013	Muster. C.	Muster. C.	ethanol 96%	ZFMKTIS18499
ZFMK-TIS-18500	Araneae	Philodromidae	Philodromus aureolus	male	adult	Germany	Hessen	Edersee	8.93	51.18	15.6.2013	Muster. C.	Muster. C.	ethanol 96%	ZFMKTIS18500
ZFMK-TIS-18501	Araneae	Philodromidae	Philodromus collinus	male	adult	Germany	Hessen	Edersee	8.93	51.18	15.6.2013	Muster. C.	Muster. C.	ethanol 96%	ZFMKTIS18501
ZFMK-TIS-18502	Araneae	Thomisidae	Diaea dorsata	male	adult	Germany	Hessen	Edersee	8.93	51.18	15.6.2013	Muster. C.	Muster. C.	ethanol 96%	ZFMKTIS18502
ZFMK-TIS-18503	Araneae	Salticidae	Evarcha falcata	male	adult	Germany	Hessen	Edersee	8.93	51.18	15.6.2013	Muster. C.	Muster. C.	ethanol 96%	ZFMKTIS18503
ZFMK-TIS-18504	Araneae	Araneidae	Araniella cucurbitina	male	adult	Germany	Hessen	Edersee	8.93	51.18	15.6.2013	Muster. C.	Muster. C.	ethanol 96%	ZFMKTIS18504
ZFMK-TIS-18505	Araneae	Araneidae	Araniella cucurbitina	male	adult	Germany	Hessen	Edersee	8.93	51.18	15.6.2013	Muster. C.	Muster. C.	ethanol 96%	ZFMKTIS18505
ZFMK-TIS-18506	Araneae	Araneidae	Araniella displicata	male	adult	Germany	Hessen	Edersee	8.93	51.18	15.6.2013	Muster. C.	Muster. C.	ethanol 96%	ZFMKTIS18506
ZFMK-TIS-18507	Araneae	Salticidae	Pseudeuophrys erratica	female	adult	Germany	Hessen	Edersee	8.93	51.18	15.6.2013	Muster. C.	Muster. C.	ethanol 96%	ZFMKTIS18507
ZFMK-TIS-18508	Araneae	Linyphiidae	Neriene radiata	male	adult	Germany	Hessen	Edersee	8.93	51.18	15.6.2013	Muster. C.	Muster. C.	ethanol 96%	ZFMKTIS18508
ZFMK-TIS-18509	Araneae	Titanoecidae	Titanoeca quadriguttata	male	adult	Germany	Hessen	Edersee	8.93	51.18	15.6.2013	Muster. C.	Muster. C.	ethanol 96%	ZFMKTIS18509
ZFMK-TIS-18510	Araneae	Lycosidae	Xerolycosa nemoralis	male	adult	Germany	Hessen	Edersee	8.93	51.18	15.6.2013	Muster. C.	Muster. C.	ethanol 96%	ZFMKTIS18510
ZFMK-TIS-18511	Araneae	Lycosidae	Xerolycosa nemoralis	male	adult	Germany	Hessen	Edersee	8.93	51.18	15.6.2013	Muster. C.	Muster. C.	ethanol 96%	ZFMKTIS18511
ZFMK-TIS-18512	Araneae	Dictynidae	Nigma flavescens	male	adult	Germany	Hessen	Edersee	8.93	51.18	15.6.2013	Muster. C.	Muster. C.	ethanol 96%	ZFMKTIS18512
ZFMK-TIS-18513	Araneae	Dictynidae	Nigma flavescens	male	adult	Germany	Hessen	Edersee	8.93	51.18	15.6.2013	Muster. C.	Muster. C.	ethanol 96%	ZFMKTIS18513
ZFMK-TIS-19062	Araneae	Salticidae	Heliophanus dampfi	female	adult	Germany	Schleswig-Holstein	Bei Loose	9.91	54.53	28.5.2013	Lemke. M.	Lemke. M.	ethanol 96%	ZFMKTIS19062
ZFMK-TIS-19063	Araneae	Linyphiidae	Walckenaeria cuspidata	female	adult	Germany	Schleswig-Holstein	Bei Loose	9.91	54.53	28.5.2013	Lemke. M.	Lemke. M.	ethanol 96%	ZFMKTIS19063
ZFMK-TIS-19064	Araneae	Linyphiidae	Baryphyma trifrons	female	adult	Germany	Schleswig-Holstein	Aschau	9.93	54.46	26.5.2013	Lemke. M.	Lemke. M.	ethanol 96%	ZFMKTIS19064
ZFMK-TIS-19065	Araneae	Linyphiidae	Walckenaeria unicornis	female	adult	Germany	Schleswig-Holstein	Aschau	9.93	54.46	26.5.2013	Lemke. M.	Lemke. M.	ethanol 96%	ZFMKTIS19065
ZFMK-TIS-19066	Araneae	Lycosidae	Pardosa prativaga	female	adult	Germany	Schleswig-Holstein	Eckernförde	9.86	54.45	26.5.2013	Lemke. M.	Lemke. M.	ethanol 96%	ZFMKTIS19066
ZFMK-TIS-19067	Araneae	Linyphiidae	Gongylidiellum vivum	male	adult	Germany	Schleswig-Holstein	Eckernförde	9.88	54.45	26.5.2013	Lemke. M.	Muster. C.	ethanol 96%	ZFMKTIS19067
ZFMK-TIS-19068	Araneae	Hahniidae	Cryphoeca silvicola	female	adult	Germany	Schleswig-Holstein	Schnellmarker Holz bei Eckernförde	9.9	54.45	26.5.2013	Lemke. M.	Lemke. M.	ethanol 96%	ZFMKTIS19068
ZFMK-TIS-19069	Araneae	Linyphiidae	Araeoncus crassiceps	male	adult	Germany	Schleswig-Holstein	Naturstrand am Schnellmarker Holz bei Eckernförde	9.9	54.45	26.5.2013	Lemke. M.	Lemke. M.	ethanol 96%	ZFMKTIS19069
ZFMK-TIS-19072	Araneae	Linyphiidae	Microlinyphia pusilla			Germany	Schleswig-Holstein	NSG Bewaldet Binnendüne bei Noer	10.02	54.47	27.6.2013	Lemke. M.	Lemke. M.	ethanol 96%	ZFMKTIS19072
ZFMK-TIS-19074	Araneae	Hahniidae	Hahnia nava	female	adult	Germany	Schleswig-Holstein	NSG Bewaldet Binnendüne bei Noer	10.02	54.47	27.5.2013	Lemke. M.	Lemke. M.	ethanol 96%	ZFMKTIS19074
ZFMK-TIS-19075	Araneae	Philodromidae	Philodromus albidus	female	adult	Germany	Schleswig-Holstein	NSG Bewaldet Binnendüne bei Noer	10.02	54.47	27.5.2013	Lemke. M.	Lemke. M.	ethanol 96%	ZFMKTIS19075
ZFMK-TIS-19077	Araneae	Lycosidae	Pardosa agrestis	male	adult	Germany	Schleswig-Holstein	NSG Bewaldet Binnendüne bei Noer	10.02	54.47	27.5.2013	Lemke. M.	Lemke. M.	ethanol 96%	ZFMKTIS19077
ZFMK-TIS-19079	Araneae	Lycosidae	Pardosa monticola	male	adult	Germany	Schleswig-Holstein	NSG Bewaldet Binnendüne bei Noer	10.02	54.47	27.5.2013	Lemke. M.	Lemke. M.	ethanol 96%	ZFMKTIS19079
ZFMK-TIS-19080	Araneae	Linyphiidae	Hylyphantes graminicola	male	adult	Germany	Schleswig-Holstein	NSG Bewaldet Binnendüne bei Noer	10.02	54.47	27.5.2013	Lemke. M.	Lemke. M.	ethanol 96%	ZFMKTIS19080
ZFMK-TIS-19081	Araneae	Linyphiidae	Hypomma bituberculatum	female	adult	Germany	Schleswig-Holstein	NSG Bewaldet Binnendüne bei Noer	10.02	54.47	27.5.2013	Lemke. M.	Lemke. M.	ethanol 96%	ZFMKTIS19081
ZFMK-TIS-19082	Araneae	Linyphiidae	Porrhomma pygmaeum	female	adult	Germany	Schleswig-Holstein	NSG Bewaldet Binnendüne bei Noer	10.02	54.47	27.5.2013	Lemke. M.	Lemke. M.	ethanol 96%	ZFMKTIS19082
ZFMK-TIS-19084	Araneae	Linyphiidae	Agyneta innotabilis	female	adult	Germany	Schleswig-Holstein	Dänisch Nienhof	10.1	54.48	30.5.2013	Lemke. M.	Krammer. H.-J.	ethanol 96%	ZFMKTIS19084
ZFMK-TIS-19087	Araneae	Linyphiidae	Mermessus trilobatus	male	adult	Germany	Schleswig-Holstein	Gudow	10.67	53.52	8.6.2013	Lemke. M.	Lemke. M.	ethanol 96%	ZFMKTIS19087
ZFMK-TIS-19088	Araneae	Gnaphosidae	Micaria pulicaria	female	adult	Germany	Schleswig-Holstein	Gudow	10.67	53.52	8.6.2013	Lemke. M.	Lemke. M.	ethanol 96%	ZFMKTIS19088
ZFMK-TIS-19089	Araneae	Theridiidae	Enoplognatha thoracica	female	adult	Germany	Schleswig-Holstein	Gudow	10.67	53.52	8.6.2013	Lemke. M.	Lemke. M.	ethanol 96%	ZFMKTIS19089
ZFMK-TIS-19091	Araneae	Linyphiidae	Walckenaeria atrotibialis	male	adult	Germany	Schleswig-Holstein	Wittenborn	10.19	53.92	15.6.2013	Lemke. M.	Lemke. M.	ethanol 96%	ZFMKTIS19091
ZFMK-TIS-19092	Araneae	Linyphiidae	Cnephalocotes obscurus	male	adult	Germany	Schleswig-Holstein	Wittenborn	10.19	53.92	15.6.2013	Lemke. M.	Krammer. H.-J.	ethanol 96%	ZFMKTIS19092
ZFMK-TIS-19093	Araneae	Linyphiidae	Gongylidiellum latebricola	female	adult	Germany	Schleswig-Holstein	Wittenborn	10.12	53.91	15.6.2013	Lemke. M.	Lemke. M.	ethanol 96%	ZFMKTIS19093
ZFMK-TIS-19094	Araneae	Salticidae	Euophrys frontalis			Germany	Schleswig-Holstein	Wittenborn	10.19	53.92	15.6.2013	Lemke. M.	Krammer. H.-J.	ethanol 96%	ZFMKTIS19094
ZFMK-TIS-19095	Araneae	Clubionidae	Clubiona diversa	female	adult	Germany	Schleswig-Holstein	Wittenborn	10.19	53.92	15.6.2013	Lemke. M.	Lemke. M.	ethanol 96%	ZFMKTIS19095
ZFMK-TIS-19100	Araneae	Linyphiidae	Agyneta affinis	male	adult	Germany	Schleswig-Holstein	Bei Salem	10.87	53.65	8.6.2013	Lemke. M.	Lemke. M.	ethanol 96%	ZFMKTIS19100
ZFMK-TIS-19102	Araneae	Hahniidae	Hahnia nava	female	adult	Germany	Schleswig-Holstein	Lübeck. Travetannen	10.75	53.9	30.6.2013	Lemke. M.	Lemke. M.	ethanol 96%	ZFMKTIS19102
ZFMK-TIS-19105	Araneae	Theridiidae	Phylloneta impressa	female	adult	Germany	Schleswig-Holstein	Büchener Sander	10.71	53.53	7.7.2013	Lemke. M.	Lemke. M.	ethanol 96%	ZFMKTIS19105
ZFMK-TIS-19106	Araneae	Thomisidae	Xysticus kochi	female	adult	Germany	Schleswig-Holstein	Büchener Sander	10.71	53.53	7.7.2013	Lemke. M.	Lemke. M.	ethanol 96%	ZFMKTIS19106
ZFMK-TIS-19107	Araneae	Theridiidae	Lasaeola tristis	male	adult	Germany	Schleswig-Holstein	Büchener Sander	10.71	53.53	7.7.2013	Lemke. M.	Lemke. M.	ethanol 96%	ZFMKTIS19107
ZFMK-TIS-19108	Araneae	Clubionidae	Clubiona brevipes	male	adult	Germany	Schleswig-Holstein	Büchener Sander	10.71	53.53	7.7.2013	Lemke. M.	Lemke. M.	ethanol 96%	ZFMKTIS19108
ZFMK-TIS-19109	Araneae	Araneidae	Araniella opisthographa	female	adult	Germany	Schleswig-Holstein	Büchener Sander	10.71	53.53	7.7.2013	Lemke. M.	Astrin. J.J.	ethanol 96%	ZFMKTIS19109
ZFMK-TIS-19110	Araneae	Clubionidae	Clubiona frutetorum	female	adult	Germany	Schleswig-Holstein	Büchener Sander	10.71	53.53	7.7.2013	Lemke. M.	Lemke. M.	ethanol 96%	ZFMKTIS19110
ZFMK-TIS-19111	Araneae	Philodromidae	Philodromus praedatus	female	adult	Germany	Schleswig-Holstein	Büchener Sander	10.71	53.53	7.7.2013	Lemke. M.	Lemke. M.	ethanol 96%	ZFMKTIS19111
ZFMK-TIS-19113	Araneae	Linyphiidae	Gonatium rubens	female	adult	Germany	Schleswig-Holstein	Heidkaten	9.88	53.82	12.8.2013	Lemke. M.	Lemke. M.	ethanol 96%	ZFMKTIS19113
ZFMK-TIS-19114	Araneae	Linyphiidae	Micrargus herbigradus	female	adult	Germany	Schleswig-Holstein	Heist	9.67	53.65	12.8.2013	Lemke. M.	Lemke. M.	ethanol 96%	ZFMKTIS19114
ZFMK-TIS-19116	Araneae	Theridiidae	Parasteatoda lunata	female	adult	Germany	Schleswig-Holstein	Heist	9.67	53.65	12.8.2013	Lemke. M.	Lemke. M.	ethanol 96%	ZFMKTIS19116
ZFMK-TIS-19117	Araneae	Hahniidae	Cryphoeca silvicola	female	adult	Germany	Schleswig-Holstein	Heist	9.67	53.65	12.8.2013	Lemke. M.	Lemke. M.	ethanol 96%	ZFMKTIS19117
ZFMK-TIS-19118	Opiliones	Phalangiidae	Mitopus morio	male		Germany	Schleswig-Holstein	Heist	9.67	53.65	12.8.2013	Lemke. M.	Pageler. J.	ethanol 96%	ZFMKTIS19118
ZFMK-TIS-19119	Opiliones	Sclerosomatidae	Leiobunum rotundum	female		Germany	Schleswig-Holstein	Heist	9.67	53.65	12.8.2013	Lemke. M.	Pageler. J.	ethanol 96%	ZFMKTIS19119
ZFMK-TIS-19120	Araneae	Salticidae	Phlegra fasciata	male	adult	Germany	Schleswig-Holstein	Heidkaten	9.88	53.82	12.8.2013	Lemke. M.	Lemke. M.	ethanol 96%	ZFMKTIS19120
ZFMK-TIS-19121	Araneae	Araneidae	Araneus quadratus	female	adult	Germany	Schleswig-Holstein	Katinger Watt. Dithmarschen	8.89	54.29	17.8.2013	Lemke. M.	Lemke. M.	ethanol 96%	ZFMKTIS19121
ZFMK-TIS-19122	Araneae	Linyphiidae	Linyphia triangularis	female	adult	Germany	Schleswig-Holstein	Katinger Watt. Dithmarschen	8.88	54.29	17.8.2013	Lemke. M.	Lemke. M.	ethanol 96%	ZFMKTIS19122
ZFMK-TIS-19124	Araneae	Tetragnathidae	Metellina segmentata	female	adult	Germany	Schleswig-Holstein	Katinger Watt. Dithmarschen	8.88	54.29	17.8.2013	Lemke. M.	Krammer. H.-J.	ethanol 96%	ZFMKTIS19124
ZFMK-TIS-19125	Opiliones	Nemastomatidae	Nemastoma lugubre			Germany	Schleswig-Holstein	Katinger Watt. Dithmarschen	8.88	54.29	17.8.2013	Lemke. M.	Lemke. M.	ethanol 96%	ZFMKTIS19125
ZFMK-TIS-19127	Araneae	Araneidae	Neoscona adianta	female	adult	Germany	Schleswig-Holstein	Peter Böhl. Nordfriesland	8.65	54.29	17.8.2014	Lemke. M.	Lemke. M.	ethanol 96%	ZFMKTIS19127
ZFMK-TIS-19129	Araneae	Theridiidae	Lasaeola tristis	male	subadult	Germany	Schleswig-Holstein	Hornbek	10.66	53.56	5.9.2013	Lemke. M.	Lemke. M.	ethanol 96%	ZFMKTIS19129
ZFMK-TIS-19130	Araneae	Salticidae	Dendryphantes rudis	male	adult	Germany	Schleswig-Holstein	Hornbek	10.66	53.56	5.9.2013	Lemke. M.	Lemke. M.	ethanol 96%	ZFMKTIS19130
ZFMK-TIS-19132	Araneae	Araneidae	Araneus angulatus		juvenile	Germany	Schleswig-Holstein	Beidendorf	10.69	53.79	14.9.2013	Lemke. M.	Lemke. M.	ethanol 96%	ZFMKTIS19132
ZFMK-TIS-19133	Araneae	Linyphiidae	Erigonella hiemalis	female	adult	Germany	Schleswig-Holstein	Wesloer Moor. Lübeck	10.77	53.87	23.2.2014	Lemke. M.	Lemke. M.	ethanol 96%	ZFMKTIS19133
ZFMK-TIS-19134	Araneae	Linyphiidae	Bathyphantes approximatus	female	adult	Germany	Schleswig-Holstein	Wesloer Moor. Lübeck	10.77	53.87	23.2.2014	Lemke. M.	Lemke. M.	ethanol 96%	ZFMKTIS19134
ZFMK-TIS-19135	Araneae	Linyphiidae	Silometopus ambiguus	male	adult	Germany	Schleswig-Holstein	NSG Südlicher Priwall. Lübeck	10.89	53.95	26.3.2014	Lemke. M.	Lemke. M.	ethanol 96%	ZFMKTIS19135
ZFMK-TIS-19137	Araneae	Clubionidae	Clubiona subtilis	female	adult	Germany	Schleswig-Holstein	Lehmrade; Drüsen	10.73	53.6	6.10.2013	Lemke. M.	Lemke. M.	ethanol 96%	ZFMKTIS19137
ZFMK-TIS-19138	Araneae	Linyphiidae	Glyphesis servulus	male	adult	Germany	Schleswig-Holstein	Schellbruch. Lübeck	10.73	53.9	23.3.2014	Lemke. M.	Lemke. M.	ethanol 96%	ZFMKTIS19138
ZFMK-TIS-19139	Araneae	Clubionidae	Clubiona subsultans	female	adult	Germany	Schleswig-Holstein	Lauerholz. Lübeck	10.74	53.89	23.3.2014	Lemke. M.	Lemke. M.	ethanol 96%	ZFMKTIS19139
ZFMK-TIS-19141	Araneae	Linyphiidae	Erigonella hiemalis	male	adult	Germany	Schleswig-Holstein	Bei Beidendorf	10.67	53.78	29.3.2014	Lemke. M.	Lemke. M.	ethanol 96%	ZFMKTIS19141
ZFMK-TIS-19142	Araneae	Linyphiidae	Stemonyphantes lineatus	male	adult	Germany	Schleswig-Holstein	Bei Beidendorf	10.67	53.78	29.3.2014	Lemke. M.	Lemke. M.	ethanol 96%	ZFMKTIS19142
ZFMK-TIS-19143	Araneae	Linyphiidae	Walckenaeria dysderoides	female	adult	Germany	Schleswig-Holstein	Bröthen	10.68	53.48	30.3.2014	Lemke. M.	Lemke. M.	ethanol 96%	ZFMKTIS19143
ZFMK-TIS-19144	Araneae	Miturgidae	Zora silvestris		juvenile	Germany	Schleswig-Holstein	Bröthen	10.68	53.48	30.3.2014	Lemke. M.	Lemke. M.	ethanol 96%	ZFMKTIS19144
ZFMK-TIS-19146	Araneae	Clubionidae	Clubiona diversa	female	adult	Germany	Schleswig-Holstein	Langenlehsten	10.73	53.49	30.3.2014	Lemke. M.	Lemke. M.	ethanol 96%	ZFMKTIS19146
ZFMK-TIS-19148	Araneae	Gnaphosidae	Micaria pulicaria			Germany	Schleswig-Holstein	NSG Wakenitz. Lübeck	10.74	53.84	1.4.2014	Lemke. M.	Lemke. M.	ethanol 96%	ZFMKTIS19148
ZFMK-TIS-19149	Araneae	Gnaphosidae	Zelotes electus	female	adult	Germany	Schleswig-Holstein	NSG Dummersdorfer Ufer. Lübeck	10.85	53.93	2.4.2014	Lemke. M.	Lemke. M.	ethanol 96%	ZFMKTIS19149
ZFMK-TIS-19150	Araneae	Linyphiidae	Walckenaeria unicornis	female	adult	Germany	Schleswig-Holstein	NSG Dummersdorfer Ufer. Lübeck	10.85	53.93	2.4.2014	Lemke. M.	Lemke. M.	ethanol 96%	ZFMKTIS19150
ZFMK-TIS-19151	Araneae	Linyphiidae	Cnephalocotes obscurus	female	adult	Germany	Schleswig-Holstein	NSG Dummersdorfer Ufer. Lübeck	10.85	53.93	2.4.2014	Lemke. M.	Lemke. M.	ethanol 96%	ZFMKTIS19151
ZFMK-TIS-19152	Araneae	Scytodidae	Scytodes thoracica	female	adult	Germany	Schleswig-Holstein	Lübeck. Altstadt	10.69	53.87	3.4.2014	Lemke. M.	Lemke. M.	ethanol 96%	ZFMKTIS19152
ZFMK-TIS-19153	Araneae	Linyphiidae	Walckenaeria cuspidata	female	adult	Germany	Schleswig-Holstein	Bliestorfer Heide	10.59	53.79	6.4.2014	Lemke. M.	Lemke. M.	ethanol 96%	ZFMKTIS19153
ZFMK-TIS-19154	Araneae	Linyphiidae	Agyneta affinis	male	adult	Germany	Schleswig-Holstein	Ratekau	10.75	53.94	12.4.2014	Lemke. M.	Lemke. M.	ethanol 96%	ZFMKTIS19154
ZFMK-TIS-19155	Araneae	Salticidae	Phlegra fasciata	male	adult	Germany	Schleswig-Holstein	Ratekau	10.75	53.94	12.4.2014	Lemke. M.	Lemke. M.	ethanol 96%	ZFMKTIS19155
ZFMK-TIS-19193	Araneae	Linyphiidae	Oedothorax gibbosus	male	adult	Germany	Mecklenburg-Vorpommern	Güstelitz. Putbus. Rügen	13.45	54.32	14.5.2012	Muster. C.	Muster. C.	ethanol 96%	ZFMKTIS19193
ZFMK-TIS-19194	Araneae	Linyphiidae	Ceratinella brevis	male	adult	Germany	Mecklenburg-Vorpommern	Güstelitz. Putbus. Rügen	13.45	54.32	7.5.2012	Muster. C.	Muster. C.	ethanol 96%	ZFMKTIS19194
ZFMK-TIS-19196	Araneae	Gnaphosidae	Scotophaeus quadripunctatus	male	adult	Germany	Sachsen	Weinböhla	13.6	51.18	25.6.2012	Muster. C.	Muster. C.	ethanol 96%	ZFMKTIS19196
ZFMK-TIS-19197	Araneae	Theridiidae	Theridion familiare	male	adult	Germany	Mecklenburg-Vorpommern	Güstelitz. Putbus. Rügen	13.45	54.32	26.5.2012	Muster. C.	Krammer. H.-J.	ethanol 96%	ZFMKTIS19197
ZFMK-TIS-19198	Araneae	Clubionidae	Clubiona phragmitis	male	adult	Germany	Mecklenburg-Vorpommern	Gager. Rügen	13.69	54.31	6.5.2012	Muster. C.	Muster. C.	ethanol 96%	ZFMKTIS19198
ZFMK-TIS-19201	Araneae	Linyphiidae	Gongylidium rufipes	male	adult	Germany	Mecklenburg-Vorpommern	Putbus. Rügen	13.46	54.32	2.5.2012	Muster. C.	Muster. C.	ethanol 96%	ZFMKTIS19201
ZFMK-TIS-19203	Araneae	Linyphiidae	Araeoncus crassiceps	male	adult	Germany	Mecklenburg-Vorpommern	Putbus. Rügen	13.46	54.32	2.5.2012	Muster. C.	Muster. C.	ethanol 96%	ZFMKTIS19203
ZFMK-TIS-19204	Araneae	Theridiidae	Theridion mystaceum	female	adult	Germany	Mecklenburg-Vorpommern	Putbus. Rügen	13.42	54.34	1.6.2012	Muster. C.	Muster. C.	ethanol 96%	ZFMKTIS19204
ZFMK-TIS-19205	Araneae	Philodromidae	Philodromus cespitum	male	adult	Germany	Mecklenburg-Vorpommern	Putbus. Rügen	13.42	54.34	4.6.2012	Muster. C.	Muster. C.	ethanol 96%	ZFMKTIS19205
ZFMK-TIS-19207	Opiliones	Phalangiidae	Phalangium opilio	male	adult	Germany	Mecklenburg-Vorpommern	Putbus. Rügen	13.42	54.34	16.6.2012	Muster. C.	Muster. C.	ethanol 96%	ZFMKTIS19207
ZFMK-TIS-19208	Araneae	Theridiidae	Parasteatoda tabulata	male	adult	Germany	Sachsen	Kaditz. Pieschen. Dresden	13.67	51.08	25.6.2012	Muster. C.	Muster. C.	ethanol 96%	ZFMKTIS19208
ZFMK-TIS-19214	Araneae	Linyphiidae	Tenuiphantes tenuis	female	adult	Germany	Sachsen	Spaargebirge. Meißen	13.52	51.14	22.6.2012	Muster. C.	Muster. C.	ethanol 96%	ZFMKTIS19214
ZFMK-TIS-19215	Araneae	Theridiidae	Phylloneta impressa	female	adult	Germany	Mecklenburg-Vorpommern	Putbus. Rügen	13.41	54.35	6.7.2012	Muster. C.	Muster. C.	ethanol 96%	ZFMKTIS19215
ZFMK-TIS-19216	Araneae	Linyphiidae	Linyphia triangularis	male	adult	Germany	Sachsen	Schwepnitz	13.95	51.34	4.8.2012	Muster. C.	Muster. C.	ethanol 96%	ZFMKTIS19216
ZFMK-TIS-19217	Araneae	Agelenidae	Allagelena gracilens	female	adult	Germany	Sachsen	Schwepnitz	13.95	51.34	4.8.2012	Muster. C.	Huber. B.A.	ethanol 96%	ZFMKTIS19217
ZFMK-TIS-19218	Araneae	Lycosidae	Pardosa lugubris	female	adult	Germany	Sachsen	Schwepnitz	13.95	51.34	4.8.2012	Muster. C.	Blick. T.	ethanol 96%	ZFMKTIS19218
ZFMK-TIS-19219	Araneae	Lycosidae	Xerolycosa nemoralis	male	adult	Germany	Sachsen	Schwepnitz	13.95	51.34	4.8.2012	Muster. C.	Muster. C.	ethanol 96%	ZFMKTIS19219
ZFMK-TIS-19220	Araneae	Theridiidae	Enoplognatha latimana	female	adult	Germany	Sachsen	Schwepnitz	13.95	51.34	4.8.2012	Muster. C.	Blick. T.	ethanol 96%	ZFMKTIS19220
ZFMK-TIS-19221	Araneae	Salticidae	Evarcha arcuata	male	adult	Germany	Sachsen	Schwepnitz	13.95	51.34	4.8.2012	Muster. C.	Muster. C.	ethanol 96%	ZFMKTIS19221
ZFMK-TIS-19222	Araneae	Oxyopidae	Oxyopes ramosus		juvenile	Germany	Sachsen	Schwepnitz	13.95	51.34	4.8.2012	Muster. C.	Muster. C.	ethanol 96%	ZFMKTIS19222
ZFMK-TIS-19223	Araneae	Lycosidae	Pardosa blanda	male	adult	Switzerland		Wallis	7.61	46.08	18.7.2012	Muster. C.	Muster. C.	ethanol 96%	ZFMKTIS19223
ZFMK-TIS-19224	Araneae	Lycosidae	Pardosa nigra	male	adult	Switzerland		Wallis	7.79	45.98	26.7.2012	Muster. C.	Muster. C.	ethanol 96%	ZFMKTIS19224
ZFMK-TIS-19225	Araneae	Lycosidae	Pardosa amentata	male	adult	Switzerland		Uri	8.43	46.59	16.7.2012	Muster. C.	Muster. C.	ethanol 96%	ZFMKTIS19225
ZFMK-TIS-19226	Araneae	Theridiidae	Rugathodes bellicosus	female	adult	Switzerland		Wallis	8.37	46.47	25.7.2012	Muster. C.	Muster. C.	ethanol 96%	ZFMKTIS19226
ZFMK-TIS-19319	Opiliones	Phalangiidae	Mitopus morio	male	adult	Switzerland		Wallis	8.15	46.41	19.7.2012	Muster. C.	Muster. C.	ethanol 96%	ZFMKTIS19319
ZFMK-TIS-19320	Opiliones	Phalangiidae	Platybunus pinetorum	female	adult	Switzerland		Wallis	8.18	46.39	24.7.2012	Muster. C.	Muster. C.	ethanol 96%	ZFMKTIS19320
ZFMK-TIS-19321	Araneae	Araneidae	Zygiella x-notata	male	adult	Germany	Mecklenburg-Vorpommern	Putbus. Rügen	13.42	54.34	16.8.2012	Muster. C.	Muster. C.	ethanol 96%	ZFMKTIS19321
ZFMK-TIS-19322	Opiliones	Phalangiidae	Opilio canestrinii	female	adult	Germany	Mecklenburg-Vorpommern	Putbus. Rügen	13.42	54.34	16.8.2012	Muster. C.	Muster. C.	ethanol 96%	ZFMKTIS19322
ZFMK-TIS-19323	Araneae	Linyphiidae	Allomengea vidua	male	adult	Germany	Mecklenburg-Vorpommern	Putbus. Rügen	13.42	54.34	16.8.2012	Muster. C.	Muster. C.	ethanol 96%	ZFMKTIS19323
ZFMK-TIS-19324	Opiliones	Nemastomatidae	Nemastoma lugubre	male	adult	Germany	Mecklenburg-Vorpommern	Putbus. Rügen	13.42	54.34	18.9.2012	Muster. C.	Muster. C.	ethanol 96%	ZFMKTIS19324
ZFMK-TIS-19325	Araneae	Hahniidae	Antistea elegans	male	adult	Germany	Sachsen	Erzgebirge. Satzung	13.19	50.5	7.9.2012	Reike. H.-P.	Muster. C.	ethanol 96%	ZFMKTIS19325
ZFMK-TIS-19328	Opiliones	Nemastomatidae	Paranemastoma quadripunctatum	female	adult	Germany	Sachsen	Erzgebirge. Satzung	13.19	50.5	7.9.2012	Reike. H.-P.	Muster. C.	ethanol 96%	ZFMKTIS19328
ZFMK-TIS-19330	Araneae	Lycosidae	Pardosa pullata	female	adult	Germany	Sachsen	Erzgebirge. Satzung	13.19	50.5	7.9.2012	Reike. H.-P.	Muster. C.	ethanol 96%	ZFMKTIS19330
ZFMK-TIS-19333	Araneae	Agelenidae	Coelotes terrestris	male	adult	Germany	Sachsen	Erzgebirge. Satzung	13.19	50.5	7.9.2012	Reike. H.-P.	Muster. C.	ethanol 96%	ZFMKTIS19333
ZFMK-TIS-19334	Opiliones	Nemastomatidae	Nemastoma lugubre	female	adult	Germany	Sachsen	Erzgebirge. Satzung	13.19	50.5	7.9.2012	Reike. H.-P.	Muster. C.	ethanol 96%	ZFMKTIS19334
ZFMK-TIS-19335	Araneae	Lycosidae	Trochosa spinipalpis	male	adult	Germany	Sachsen	Erzgebirge. Satzung	13.19	50.5	7.9.2012	Reike. H.-P.	Krammer. H.-J.	ethanol 96%	ZFMKTIS19335
ZFMK-TIS-19336	Araneae	Linyphiidae	Oedothorax gibbosus	male	adult	Germany	Sachsen	Erzgebirge. Satzung	13.19	50.5	7.9.2012	Reike. H.-P.	Muster. C.	ethanol 96%	ZFMKTIS19336
ZFMK-TIS-19339	Araneae	Linyphiidae	Microlinyphia pusilla	female	adult	Germany	Sachsen	Erzgebirge. Satzung	13.19	50.5	7.9.2012	Reike. H.-P.	Muster. C.	ethanol 96%	ZFMKTIS19339
ZFMK-TIS-19340	Araneae	Liocranidae	Agroeca proxima	male	adult	Germany	Sachsen	Erzgebirge. Satzung	13.19	50.5	7.9.2012	Reike. H.-P.	Muster. C.	ethanol 96%	ZFMKTIS19340
ZFMK-TIS-19341	Araneae	Clubionidae	Clubiona diversa	male	adult	Germany	Sachsen	Erzgebirge. Satzung	13.19	50.5	7.9.2012	Reike. H.-P.	Muster. C.	ethanol 96%	ZFMKTIS19341
ZFMK-TIS-19343	Araneae	Araneidae	Araneus quadratus	male	adult	Germany	Sachsen	Erzgebirge. Satzung	13.19	50.5	7.9.2012	Reike. H.-P.	Muster. C.	ethanol 96%	ZFMKTIS19343
ZFMK-TIS-19345	Opiliones	Phalangiidae	Paroligolophus agrestis	female	adult	Germany	Mecklenburg-Vorpommern	Putbus. Rügen	13.42	54.34	24.9.2012	Muster. C.	Muster. C.	ethanol 96%	ZFMKTIS19345
ZFMK-TIS-1983	Araneae	Theridiidae	Episinus truncatus	male	adult	Germany	Baden-Württemberg	Hirschberg-Leutershausen	8.67	49.5	1.8.2012	Wunderlich. J.	Wunderlich. J.	ethanol 96%	ZFMKTIS1983
ZFMK-TIS-1986	Araneae	Mimetidae	Ero aphana	female	adult	Germany	Baden-Württemberg	Hirschberg-Leutershausen	8.67	49.5	1.8.2012	Wunderlich. J.	Wunderlich. J.	ethanol 96%	ZFMKTIS1986
ZFMK-TIS-1994	Araneae	Linyphiidae	Oedothorax apicatus	male	adult	Germany	Baden-Württemberg	Hirschberg-Leutershausen	8.67	49.5	1.8.2012	Wunderlich. J.	Wunderlich. J.	ethanol 96%	ZFMKTIS1994
ZFMK-TIS-1996	Araneae	Philodromidae	Philodromus aureolus	female	adult	Germany	Baden-Württemberg	Hirschberg-Leutershausen	8.67	49.5	1.8.2012	Wunderlich. J.	Wunderlich. J.	ethanol 96%	ZFMKTIS1996
ZFMK-TIS-2000372	Opiliones	Sclerosomatidae	Leiobunum religiosum			Luxembourg		Luxemburg	6.15	49.61	14.8.2013	Weigand. A.M.	Weigand. A.M.	ethanol 96%	ZFMKTIS2000372
ZFMK-TIS-2000379	Araneae	Amaurobiidae	Amaurobius ferox		juvenile	Germany	Rheinland-Pfalz	Rheinland-Pfalz. Verbandsgemeinde Loreley	7.78	50.1	12.5.2013	Jamann. S.; Kraus. D.	Blick. T.	ethanol 96%	ZFMKTIS2000379
ZFMK-TIS-2000380	Araneae	Agelenidae	Eratigena atrica	female		Germany	Bayern	Bayern. Rhön-Grabfeld	10.27	50.4	19.2.2012	Kliesch. C.	Blick. T.	ethanol 96%	ZFMKTIS2000380
ZFMK-TIS-2000381	Araneae	Agelenidae	Eratigena atrica	female		Germany	Hessen	Hessen. Kirchheim	9.58	50.84	2.2.2013	Brack. S.; Bramesfeld. W.; Bogon. K.; Dienstbier. L.; Henkel. H.; König. Ch.. M.	Blick. T.	ethanol 96%	ZFMKTIS2000381
ZFMK-TIS-2000382	Araneae	Agelenidae	Eratigena atrica	female		Germany	Hessen	Hessen. Meißner	9.95	51.22	27.12.2012	Friebe. R.; Friebe. U.; Lang. G.; Hillen. J.; Kaiser. U.; Zaenker. A.	Blick. T.	ethanol 96%	ZFMKTIS2000382
ZFMK-TIS-2000392	Opiliones	Phalangiidae	Amilenus aurantiacus	female		Germany	Nordrhein-Westfalen	Nordrhein-Westfalen. Hallenberg	8.59	51.1	15.2.2014	Balkaya. Ö.; Graser. A.; Schmitt. A.; Seumer. F.; Subzow. J.	Zaenker. S.	ethanol 96%	ZFMKTIS2000392
ZFMK-TIS-2000393	Opiliones	Phalangiidae	Amilenus aurantiacus	male		Germany	Nordrhein-Westfalen	Nordrhein-Westfalen. Hallenberg	8.59	51.1	15.2.2014	Balkaya. Ö.; Graser. A.; Schmitt. A.; Seumer. F.; Subzow. J.	Zaenker. S.	ethanol 96%	ZFMKTIS2000393
ZFMK-TIS-2000394	Opiliones	Phalangiidae	Amilenus aurantiacus	female		Germany	Hessen	Hessen. Sinntal	9.61	50.23	8.2.2014	Auth. H.; Dietz. M.; Eichenauer. K.; Koch. J.; Krannich. A.; Sauerbrei. R.	Zaenker. S.	ethanol 96%	ZFMKTIS2000394
ZFMK-TIS-2000395	Opiliones	Phalangiidae	Amilenus aurantiacus	female		Germany	Hessen	Hessen. Sinntal	9.61	50.23	8.2.2014	Auth. H.; Dietz. M.; Eichenauer. K.; Koch. J.; Krannich. A.; Sauerbrei. R.	Zaenker. S.	ethanol 96%	ZFMKTIS2000395
ZFMK-TIS-2000398	Araneae	Tetragnathidae	Meta menardi			Germany	Baden-Württemberg	Baden-Württemberg. Schelklingen	9.64	48.38	30.3.2014	Boldt. P.	Boldt. P.	ethanol 96%	ZFMKTIS2000398
ZFMK-TIS-2000399	Araneae	Tetragnathidae	Meta menardi			Germany	Baden-Württemberg	Baden-Württemberg. Schelklingen	9.64	48.38	30.3.2014	Boldt. P.	Boldt. P.	ethanol 96%	ZFMKTIS2000399
ZFMK-TIS-2000432	Araneae	Tetragnathidae	Meta bourneti	female	adult	Germany	Rheinland-Pfalz	Neustadt an der Weinstraße	14.53	51.88	25.12.2012	Weber. D.	Weber. D.	ethanol 96%	ZFMKTIS2000432
ZFMK-TIS-2000433	Araneae	Tetragnathidae	Meta bourneti	female	adult	Germany	Rheinland-Pfalz	Neustadt an der Weinstraße	14.53	51.88	25.12.2012	Weber. D.	Weber. D.	ethanol 96%	ZFMKTIS2000433
ZFMK-TIS-2004	Araneae	Liocranidae	Liocranum rupicola	female	adult	Germany	Baden-Württemberg	Hirschberg-Leutershausen	8.67	49.5	1.8.2012	Wunderlich. J.	Wunderlich. J.	ethanol 96%	ZFMKTIS2004
ZFMK-TIS-2008	Araneae	Theridiidae	Dipoena melanogaster	female	adult	Germany	Baden-Württemberg	Hirschberg-Leutershausen	8.67	49.5	1.8.2012	Wunderlich. J.	Wunderlich. J.	ethanol 96%	ZFMKTIS2008
ZFMK-TIS-2016	Araneae	Theridiidae	Anelosimus vittatus	female	adult	Germany	Baden-Württemberg	Hirschberg-Leutershausen	8.67	49.5	1.8.2012	Wunderlich. J.	Krammer. H.-J.	ethanol 96%	ZFMKTIS2016
ZFMK-TIS-2030	Araneae	Salticidae	Heliophanus cupreus	male	adult	Germany	Baden-Württemberg	Hirschberg-Leutershausen	8.67	49.5	1.8.2012	Wunderlich. J.	Wunderlich. J.	ethanol 96%	ZFMKTIS2030
ZFMK-TIS-2031	Araneae	Zodariidae	Zodarion italicum	female	adult	Germany	Baden-Württemberg	Hirschberg-Leutershausen	8.67	49.5	1.8.2012	Wunderlich. J.	Wunderlich. J.	ethanol 96%	ZFMKTIS2031
ZFMK-TIS-2035	Araneae	Araneidae	Araneus diadematus		juvenile	Germany	Baden-Württemberg	Hirschberg-Leutershausen	8.67	49.5	1.8.2012	Wunderlich. J.	Wunderlich. J.	ethanol 96%	ZFMKTIS2035
ZFMK-TIS-2038	Araneae	Theridiidae	Heterotheridion nigrovariegatum	male	adult	Germany	Baden-Württemberg	Hirschberg-Leutershausen	8.67	49.5	1.8.2012	Wunderlich. J.	Wunderlich. J.	ethanol 96%	ZFMKTIS2038
ZFMK-TIS-2042	Araneae	Araneidae	Araneus sturmi	female	adult	Germany	Baden-Württemberg	Hirschberg-Leutershausen	8.67	49.5	1.8.2012	Wunderlich. J.	Wunderlich. J.	ethanol 96%	ZFMKTIS2042
ZFMK-TIS-2047	Araneae	Salticidae	Macaroeris nidicolens	male	adult	Germany	Baden-Württemberg	Hirschberg-Leutershausen	8.67	49.5	1.8.2012	Wunderlich. J.	Wunderlich. J.	ethanol 96%	ZFMKTIS2047
ZFMK-TIS-2048	Araneae	Linyphiidae	Agyneta rurestris	male	adult	Germany	Baden-Württemberg	Hirschberg-Leutershausen	8.67	49.5	1.8.2012	Wunderlich. J.	Huber. B.A.	ethanol 96%	ZFMKTIS2048
ZFMK-TIS-2051	Araneae	Salticidae	Ballus chalybeius	female	adult	Germany	Baden-Württemberg	Hirschberg-Leutershausen	8.67	49.5	1.8.2012	Wunderlich. J.	Wunderlich. J.	ethanol 96%	ZFMKTIS2051
ZFMK-TIS-2053	Araneae	Pholcidae	Pholcus phalangioides	female	adult	Germany	Baden-Württemberg	Hirschberg-Leutershausen	8.67	49.5	1.8.2012	Wunderlich. J.	Krammer. H.-J.	ethanol 96%	ZFMKTIS2053
ZFMK-TIS-2057	Araneae	Anyphaenidae	Anyphaena accentuata	female	adult	Germany	Baden-Württemberg	Hirschberg-Leutershausen	8.67	49.5	1.8.2012	Wunderlich. J.	Wunderlich. J.	ethanol 96%	ZFMKTIS2057
ZFMK-TIS-20868	Araneae	Linyphiidae	Diplostyla concolor	male	adult	Germany	Nordrhein-Westfalen	Quirrenbach	7.31	50.69	10.5.2012	Huber. B.A. et al.	Huber. B.A.	ethanol 96%	ZFMKTIS20868
ZFMK-TIS-20870	Araneae	Salticidae	Ballus chalybeius	male	adult	Germany	Nordrhein-Westfalen	Quirrenbach	7.31	50.69	10.5.2012	Huber. B.A. et al.	Huber. B.A.	ethanol 96%	ZFMKTIS20870
ZFMK-TIS-20871	Araneae	Tetragnathidae	Pachygnatha listeri	male	adult	Germany	Nordrhein-Westfalen	Quirrenbach	7.31	50.69	10.5.2012	Huber. B.A. et al.	Huber. B.A.	ethanol 96%	ZFMKTIS20871
ZFMK-TIS-20872	Araneae	Thomisidae	Xysticus ulmi	male	adult	Germany	Nordrhein-Westfalen	Quirrenbach	7.31	50.69	10.5.2012	Huber. B.A. et al.	Huber. B.A.	ethanol 96%	ZFMKTIS20872
ZFMK-TIS-20873	Araneae	Dysderidae	Dysdera erythrina	male	adult	Germany	Nordrhein-Westfalen	Quirrenbach	7.31	50.69	10.5.2012	Huber. B.A. et al.	Huber. B.A.	ethanol 96%	ZFMKTIS20873
ZFMK-TIS-20874	Araneae	Theridiidae	Platnickina tincta	male	adult	Germany	Nordrhein-Westfalen	Quirrenbach	7.31	50.69	10.5.2012	Huber. B.A. et al.	Huber. B.A.	ethanol 96%	ZFMKTIS20874
ZFMK-TIS-20875	Araneae	Theridiidae	Platnickina tincta	male	adult	Germany	Nordrhein-Westfalen	Kottenforst. Friesdorf. Bonn	7.12	50.69	17.5.2012	Huber. B.A.	Huber. B.A.	ethanol 96%	ZFMKTIS20875
ZFMK-TIS-20876	Araneae	Philodromidae	Philodromus dispar	male	adult	Germany	Nordrhein-Westfalen	Kottenforst. Friesdorf. Bonn	7.12	50.69	17.5.2012	Huber. B.A.	Huber. B.A.	ethanol 96%	ZFMKTIS20876
ZFMK-TIS-20877	Araneae	Agelenidae	Histopona torpida	male	adult	Germany	Nordrhein-Westfalen	Kottenforst. Friesdorf. Bonn	7.12	50.69	17.5.2012	Huber. B.A.	Huber. B.A.	ethanol 96%	ZFMKTIS20877
ZFMK-TIS-20878	Araneae	Miturgidae	Zora spinimana	male	adult	Germany	Nordrhein-Westfalen	Kottenforst. Friesdorf. Bonn	7.12	50.69	17.5.2012	Huber. B.A.	Huber. B.A.	ethanol 96%	ZFMKTIS20878
ZFMK-TIS-20879	Araneae	Linyphiidae	Neriene peltata	male	adult	Germany	Nordrhein-Westfalen	Kottenforst. Friesdorf. Bonn	7.12	50.69	17.5.2012	Huber. B.A.	Huber. B.A.	ethanol 96%	ZFMKTIS20879
ZFMK-TIS-20880	Araneae	Linyphiidae	Diplostyla concolor	male	adult	Germany	Nordrhein-Westfalen	Kottenforst. Friesdorf. Bonn	7.12	50.69	17.5.2012	Huber. B.A.	Huber. B.A.	ethanol 96%	ZFMKTIS20880
ZFMK-TIS-20881	Araneae	Linyphiidae	Tenuiphantes zimmermanni	male	adult	Germany	Nordrhein-Westfalen	Kottenforst. Friesdorf. Bonn	7.12	50.69	17.5.2012	Huber. B.A.	Huber. B.A.	ethanol 96%	ZFMKTIS20881
ZFMK-TIS-20882	Araneae	Thomisidae	Xysticus lanio	male	adult	Germany	Nordrhein-Westfalen	Bonn. Bad Godesberg	7.15	50.69	5.9.2012	Huber. B.A.	Huber. B.A.	ethanol 96%	ZFMKTIS20882
ZFMK-TIS-20883	Araneae	Tetragnathidae	Pachygnatha degeeri	male	adult	Germany	Nordrhein-Westfalen	Bonn. Bad Godesberg	7.15	50.69	15.3.2012	Huber. B.A.	Huber. B.A.	ethanol 96%	ZFMKTIS20883
ZFMK-TIS-20884	Araneae	Thomisidae	Ozyptila praticola	male	adult	Germany	Nordrhein-Westfalen	Bonn. Bad Godesberg	7.15	50.69	5.9.2012	Huber. B.A.	Huber. B.A.	ethanol 96%	ZFMKTIS20884
ZFMK-TIS-20885	Araneae	Linyphiidae	Microneta viaria	male	adult	Germany	Nordrhein-Westfalen	Bonn. Bad Godesberg	7.15	50.69	15.3.2012	Huber. B.A.	Huber. B.A.	ethanol 96%	ZFMKTIS20885
ZFMK-TIS-20886	Araneae	Philodromidae	Philodromus dispar	male	adult	Germany	Nordrhein-Westfalen	Bonn. Bad Godesberg	7.14	50.69	29.5.2012	Huber. B.A.	Huber. B.A.	ethanol 96%	ZFMKTIS20886
ZFMK-TIS-20887	Araneae	Eutichuridae	Cheiracanthium mildei		adult	Germany	Nordrhein-Westfalen	Bonn. Bad Godesberg	7.14	50.69	6.6.2012	Huber. B.A.	Huber. B.A.	ethanol 96%	ZFMKTIS20887
ZFMK-TIS-20888	Araneae	Salticidae	Marpissa muscosa	male	adult	Germany	Nordrhein-Westfalen	Bonn. Bad Godesberg	7.14	50.69	28.5.2012	Huber. B.A.	Huber. B.A.	ethanol 96%	ZFMKTIS20888
ZFMK-TIS-20889	Araneae	Theridiidae	Neottiura bimaculata	male	adult	Germany	Nordrhein-Westfalen	Bonn. Bad Godesberg	7.14	50.69	2.6.2012	Huber. B.A.	Huber. B.A.	ethanol 96%	ZFMKTIS20889
ZFMK-TIS-20892	Araneae	Dictynidae	Nigma flavescens	male	adult	Germany	Nordrhein-Westfalen	Kottenforst. Schweinheim. Bonn	7.12	50.67	28.5.2012	Huber. B.A.	Huber. B.A.	ethanol 96%	ZFMKTIS20892
ZFMK-TIS-20894	Araneae	Pholcidae	Pholcus opilionoides	male	adult	Austria		Ramsau	14.24	47.85	30.08.2012	Huber. B.A.	Huber. B.A.	ethanol 96%	ZFMKTIS20894
ZFMK-TIS-20895	Araneae	Araneidae	Araneus diadematus	male	adult	Austria		Ramsau	14.24	47.85	30.08.2012	Huber. B.A.	Huber. B.A.	ethanol 96%	ZFMKTIS20895
ZFMK-TIS-20896	Araneae	Nesticidae	Nesticus cellulanus		adult	Austria		Ramsau	14.24	47.85	30.08.2012	Huber. B.A.	Huber. B.A.	ethanol 96%	ZFMKTIS20896
ZFMK-TIS-20897	Araneae	Theridiidae	Steatoda bipunctata	male	adult	Austria		Ramsau	14.24	47.85	30.08.2012	Huber. B.A.	Huber. B.A.	ethanol 96%	ZFMKTIS20897
ZFMK-TIS-20898	Araneae	Theridiidae	Theridion varians	male	adult	Austria		Ramsau	14.24	47.85	30.08.2012	Huber. B.A.	Huber. B.A.	ethanol 96%	ZFMKTIS20898
ZFMK-TIS-20899	Araneae	Araneidae	Cyclosa conica		adult	Austria		Ramsau	14.24	47.85	30.08.2012	Huber. B.A.	Huber. B.A.	ethanol 96%	ZFMKTIS20899
ZFMK-TIS-20900	Araneae	Agelenidae	Coelotes terrestris		adult	Austria		Ramsau	6.08	50.72	30.08.2012	Huber. B.A.	Huber. B.A.	ethanol 96%	ZFMKTIS20900
ZFMK-TIS-20901	Araneae	Clubionidae	Clubiona caerulescens		adult	Austria		Ramsau	14.24	47.85	30.08.2012	Huber. B.A.	Huber. B.A.	ethanol 96%	ZFMKTIS20901
ZFMK-TIS-20902	Araneae	Linyphiidae	Neriene emphana	male	adult	Austria		Ramsau	14.24	47.85	30.08.2012	Huber. B.A.	Huber. B.A.	ethanol 96%	ZFMKTIS20902
ZFMK-TIS-20903	Araneae	Pisauridae	Pisaura mirabilis		juvenile	Austria		Ramsau	14.24	47.85	30.08.2012	Huber. B.A.	Huber. B.A.	ethanol 96%	ZFMKTIS20903
ZFMK-TIS-20904	Araneae	Sparassidae	Micrommata virescens		juvenile	Austria		Ramsau	14.24	47.85	30.08.2012	Huber. B.A.	Huber. B.A.	ethanol 96%	ZFMKTIS20904
ZFMK-TIS-20905	Araneae	Gnaphosidae	Zelotes subterraneus	male	adult	Austria		Ramsau	14.24	47.85	30.08.2012	Huber. B.A.	Huber. B.A.	ethanol 96%	ZFMKTIS20905
ZFMK-TIS-20907	Araneae	Uloboridae	Hyptiotes paradoxus		adult	Austria		Walding. Oberösterreich	14.17	48.36	30.08.2012	Huber. B.A.	Huber. B.A.	ethanol 96%	ZFMKTIS20907
ZFMK-TIS-20908	Araneae	Tetragnathidae	Metellina merianae	male	adult	Austria		Walding. Oberösterreich	14.17	48.36	30.08.2012	Huber. B.A.	Huber. B.A.	ethanol 96%	ZFMKTIS20908
ZFMK-TIS-20909	Araneae	Thomisidae	Misumena vatia		adult	Austria		Walding. Oberösterreich	14.17	48.36	30.08.2012	Huber. B.A.	Huber. B.A.	ethanol 96%	ZFMKTIS20909
ZFMK-TIS-20910	Araneae	Agelenidae	Eratigena atrica	male	adult	Germany	Nordrhein-Westfalen	Bonn. Bad Godesberg	7.15	50.69	22.8.2012	Huber. B.A.	Huber. B.A.	ethanol 96%	ZFMKTIS20910
ZFMK-TIS-20911	Araneae	Dictynidae	Nigma walckenaeri	female	adult	Germany	Nordrhein-Westfalen	Bonn. Bad Godesberg	7.15	50.69	21.8.2012	Huber. B.A.	Krammer. H.-J.	ethanol 96%	ZFMKTIS20911
ZFMK-TIS-20912	Araneae	Tetragnathidae	Pachygnatha degeeri	male	adult	Germany	Nordrhein-Westfalen	Bonn. Bad Godesberg	7.15	50.69	24.8.2012	Huber. B.A.	Huber. B.A.	ethanol 96%	ZFMKTIS20912
ZFMK-TIS-20913	Araneae	Linyphiidae	Erigone atra	male	adult	Germany	Nordrhein-Westfalen	Bonn. Bad Godesberg	7.15	50.69	21.8.2012	Huber. B.A.	Krammer. H.-J.	ethanol 96%	ZFMKTIS20913
ZFMK-TIS-20914	Araneae	Tetragnathidae	Metellina segmentata	male	adult	Germany	Nordrhein-Westfalen	Bonn. Bad Godesberg	7.15	50.69	21.8.2012	Huber. B.A.	Huber. B.A.	ethanol 96%	ZFMKTIS20914
ZFMK-TIS-20915	Araneae	Linyphiidae	Linyphia triangularis	male	adult	Germany	Nordrhein-Westfalen	Bonn. Bad Godesberg	7.15	50.69	21.8.2012	Huber. B.A.	Huber. B.A.	ethanol 96%	ZFMKTIS20915
ZFMK-TIS-20916	Araneae	Segestriidae	Segestria senoculata		juvenile	Austria		Hochbuchberg	14.31	47.92	30.08.2012	Huber. B.A.	Huber. B.A.	ethanol 96%	ZFMKTIS20916
ZFMK-TIS-20917	Araneae	Theridiidae	Parasteatoda tepidariorum	male	adult	Germany	Nordrhein-Westfalen	Bonn. Bad Godesberg	7.15	50.69	29.8.2012	Huber. B.A.	Huber. B.A.	ethanol 96%	ZFMKTIS20917
ZFMK-TIS-20918	Araneae	Theridiidae	Pholcomma gibbum	male	adult	Germany	Nordrhein-Westfalen	Bonn. Bad Godesberg	7.15	50.69	21.6.2012	Huber. B.A.	Huber. B.A.	ethanol 96%	ZFMKTIS20918
ZFMK-TIS-20919	Araneae	Araneidae	Araneus diadematus	male	adult	Germany	Nordrhein-Westfalen	Bonn. Bad Godesberg	7.15	50.69	26.8.2012	Huber. B.A.	Huber. B.A.	ethanol 96%	ZFMKTIS20919
ZFMK-TIS-20920	Araneae	Araneidae	Zilla diodia		adult	Germany	Nordrhein-Westfalen	Bonn. Bad Godesberg	7.15	50.69	21.6.2012	Huber. B.A.	Huber. B.A.	ethanol 96%	ZFMKTIS20920
ZFMK-TIS-20921	Araneae	Pholcidae	Pholcus opilionoides	male	adult	Germany	Nordrhein-Westfalen	Bonn. Bad Godesberg	7.15	50.69	29.8.2012	Huber. B.A.	Huber. B.A.	ethanol 96%	ZFMKTIS20921
ZFMK-TIS-20922	Araneae	Pisauridae	Pisaura mirabilis		adult	Germany	Nordrhein-Westfalen	Bonn. Röttgen	7.07	50.68	24.5.2012	Ahrens. D. et al.	Huber. B.A.	ethanol 96%	ZFMKTIS20922
ZFMK-TIS-20923	Araneae	Thomisidae	Pistius truncatus		adult	Germany	Nordrhein-Westfalen	Bonn. Röttgen	7.07	50.68	24.5.2012	Ahrens. D. et al.	Huber. B.A.	ethanol 96%	ZFMKTIS20923
ZFMK-TIS-20924	Araneae	Thomisidae	Xysticus ulmi	male	adult	Germany	Nordrhein-Westfalen	Bonn. Röttgen	7.07	50.68	24.5.2012	Ahrens. D. et al.	Huber. B.A.	ethanol 96%	ZFMKTIS20924
ZFMK-TIS-20925	Araneae	Clubionidae	Clubiona comta		adult	Germany	Nordrhein-Westfalen	Bonn. Röttgen	7.07	50.68	24.5.2012	Ahrens. D. et al.	Huber. B.A.	ethanol 96%	ZFMKTIS20925
ZFMK-TIS-20926	Araneae	Thomisidae	Ozyptila praticola	male	adult	Germany	Rheinland-Pfalz	Niederzissen. Bausenberg	7.22	50.47	16.5.2012	Wesener. T. et al.	Huber. B.A.	ethanol 96%	ZFMKTIS20926
ZFMK-TIS-20927	Araneae	Gnaphosidae	Callilepis schuszteri	male	adult	Germany	Rheinland-Pfalz	Niederzissen. Bausenberg	7.22	50.47	16.5.2012	Wesener. T. et al.	Huber. B.A.	ethanol 96%	ZFMKTIS20927
ZFMK-TIS-20928	Araneae	Salticidae	Pellenes tripunctatus	male	adult	Germany	Rheinland-Pfalz	Niederzissen. Bausenberg	7.22	50.47	16.5.2012	Wesener. T. et al.	Huber. B.A.	ethanol 96%	ZFMKTIS20928
ZFMK-TIS-20929	Araneae	Salticidae	Myrmarachne formicaria		adult	Germany	Rheinland-Pfalz	Niederzissen. Bausenberg	7.22	50.47	16.5.2012	Wesener. T. et al.	Huber. B.A.	ethanol 96%	ZFMKTIS20929
ZFMK-TIS-20930	Araneae	Gnaphosidae	Drassodes lapidosus	male	adult	Germany	Rheinland-Pfalz	Niederzissen. Bausenberg	7.22	50.47	16.5.2012	Wesener. T. et al.	Huber. B.A.	ethanol 96%	ZFMKTIS20930
ZFMK-TIS-20931	Araneae	Araneidae	Gibbaranea bituberculata		adult	Germany	Rheinland-Pfalz	Niederzissen. Bausenberg	7.22	50.47	16.5.2012	Wesener. T. et al.	Huber. B.A.	ethanol 96%	ZFMKTIS20931
ZFMK-TIS-20932	Araneae	Amaurobiidae	Amaurobius fenestralis		adult	Germany	Nordrhein-Westfalen	Kottenforst. Friesdorf. Bonn	7.12	50.69	22.6.2012	Huber. B.A.	Huber. B.A.	ethanol 96%	ZFMKTIS20932
ZFMK-TIS-20934	Araneae	Araneidae	Cyclosa conica		adult	Germany	Nordrhein-Westfalen	Kottenforst. Friesdorf. Bonn	7.12	50.69	22.6.2012	Huber. B.A.	Huber. B.A.	ethanol 96%	ZFMKTIS20934
ZFMK-TIS-20936	Araneae	Linyphiidae	Hypomma cornutum	male	adult	Germany	Nordrhein-Westfalen	Quirrenbach	7.3	50.69	10.5.2012	Huber. B.A. et al.	Huber. B.A.	ethanol 96%	ZFMKTIS20936
ZFMK-TIS-20937	Araneae	Linyphiidae	Hypomma cornutum	female	adult	Germany	Nordrhein-Westfalen	Quirrenbach	7.31	50.69	10.5.2012	Huber. B.A. et al.	Huber. B.A.	ethanol 96%	ZFMKTIS20937
ZFMK-TIS-20938	Araneae	Linyphiidae	Dismodicus bifrons	male	adult	Germany	Nordrhein-Westfalen	Quirrenbach	6.56	51.7	10.5.2012	Huber. B.A. et al.	Huber. B.A.	ethanol 96%	ZFMKTIS20938
ZFMK-TIS-20939	Araneae	Agelenidae	Coelotes terrestris		adult	Germany	Nordrhein-Westfalen	Quirrenbach	6.56	51.7	10.5.2012	Huber. B.A. et al.	Huber. B.A.	ethanol 96%	ZFMKTIS20939
ZFMK-TIS-20940	Araneae	Agelenidae	Coelotes terrestris		adult	Germany	Nordrhein-Westfalen	Quirrenbach	6.56	51.7	10.5.2012	Huber. B.A. et al.	Huber. B.A.	ethanol 96%	ZFMKTIS20940
ZFMK-TIS-20941	Araneae	Linyphiidae	Labulla thoracica		adult	Austria		Ramsau	14.24	47.85	30.08.2012	Huber. B.A.	Huber. B.A.	ethanol 96%	ZFMKTIS20941
ZFMK-TIS-20942	Araneae	Linyphiidae	Labulla thoracica		adult	Austria		Ramsau. Oberösterreich	14.24	47.85	30.08.2012	Huber. B.A.	Huber. B.A.	ethanol 96%	ZFMKTIS20942
ZFMK-TIS-20943	Araneae	Araneidae	Argiope bruennichi		adult	Austria		Ramsau	14.24	47.85	30.08.2012	Huber. B.A.	Huber. B.A.	ethanol 96%	ZFMKTIS20943
ZFMK-TIS-20944	Araneae	Araneidae	Argiope bruennichi	male	adult	Austria		Ramsau. Oberösterreich	14.24	47.85	30.08.2012	Huber. B.A.	Huber. B.A.	ethanol 96%	ZFMKTIS20944
ZFMK-TIS-20945	Araneae	Araneidae	Nuctenea umbratica		adult	Austria		Walding. Oberösterreich	14.17	48.36	30.08.2012	Huber. B.A.	Huber. B.A.	ethanol 96%	ZFMKTIS20945
ZFMK-TIS-20946	Araneae	Araneidae	Nuctenea umbratica		adult	Austria		Walding. Oberösterreich	14.17	48.36	30.08.2012	Huber. B.A.	Huber. B.A.	ethanol 96%	ZFMKTIS20946
ZFMK-TIS-20947	Araneae	Linyphiidae	Gonatium rubellum	male	adult	Austria		Walding. Oberösterreich	14.17	48.36	30.08.2012	Huber. B.A.	Huber. B.A.	ethanol 96%	ZFMKTIS20947
ZFMK-TIS-20948	Araneae	Linyphiidae	Gonatium rubellum		adult	Austria		Walding. Oberösterreich	14.17	48.36	30.08.2012	Huber. B.A.	Huber. B.A.	ethanol 96%	ZFMKTIS20948
ZFMK-TIS-20949	Araneae	Theridiidae	Steatoda bipunctata		adult	Germany	Nordrhein-Westfalen	Bonn. Bad Godesberg	7.15	50.69	29.8.2012	Huber. B.A.	Huber. B.A.	ethanol 96%	ZFMKTIS20949
ZFMK-TIS-20950	Araneae	Theridiidae	Steatoda bipunctata		adult	Germany	Nordrhein-Westfalen	Bonn. Bad Godesberg	7.15	50.69	29.8.2012	Huber. B.A.	Huber. B.A.	ethanol 96%	ZFMKTIS20950
ZFMK-TIS-20951	Araneae	Uloboridae	Hyptiotes paradoxus		juvenile	Germany	Nordrhein-Westfalen	Kottenforst. Friesdorf. Bonn	7.12	50.69	22.6.2012	Huber. B.A.	Huber. B.A.	ethanol 96%	ZFMKTIS20951
ZFMK-TIS-20952	Araneae	Uloboridae	Hyptiotes paradoxus		juvenile	Germany	Nordrhein-Westfalen	Kottenforst. Friesdorf. Bonn	7.12	50.69	22.6.2012	Huber. B.A.	Huber. B.A.	ethanol 96%	ZFMKTIS20952
ZFMK-TIS-20953	Araneae	Linyphiidae	Linyphia triangularis	male	adult	Austria		Ramsau	14.24	47.85	30.08.2012	Huber. B.A.	Huber. B.A.	ethanol 96%	ZFMKTIS20953
ZFMK-TIS-20954	Araneae	Linyphiidae	Linyphia triangularis	male	adult	Austria		Ramsau. Oberösterreich	14.24	47.85	30.08.2012	Huber. B.A.	Huber. B.A.	ethanol 96%	ZFMKTIS20954
ZFMK-TIS-20955	Araneae	Clubionidae	Clubiona terrestris	male	adult	Germany	Nordrhein-Westfalen	Bonn. Bad Godesberg	7.15	50.69	21.6.2012	Huber. B.A.	Huber. B.A.	ethanol 96%	ZFMKTIS20955
ZFMK-TIS-20956	Araneae	Clubionidae	Clubiona terrestris	male	adult	Germany	Nordrhein-Westfalen	Bonn. Bad Godesberg	7.15	50.69	21.6.2012	Huber. B.A.	Huber. B.A.	ethanol 96%	ZFMKTIS20956
ZFMK-TIS-20957	Araneae	Tetragnathidae	Metellina merianae	male	adult	Austria		Ramsau	14.24	47.85	30.08.2012	Huber. B.A.	Huber. B.A.	ethanol 96%	ZFMKTIS20957
ZFMK-TIS-20958	Araneae	Tetragnathidae	Metellina merianae		adult	Austria		Ramsau. Oberösterreich	14.24	47.85	30.08.2012	Huber. B.A.	Huber. B.A.	ethanol 96%	ZFMKTIS20958
ZFMK-TIS-20961	Araneae	Theridiidae	Parasteatoda tepidariorum	male	adult	Germany	Nordrhein-Westfalen	Bonn. Bad Godesberg	7.15	50.69	21.8.2012	Huber. B.A.	Huber. B.A.	ethanol 96%	ZFMKTIS20961
ZFMK-TIS-20962	Araneae	Theridiidae	Parasteatoda tepidariorum	male	adult	Germany	Nordrhein-Westfalen	Bonn. Bad Godesberg	7.15	50.69	21.8.2012	Huber. B.A.	Huber. B.A.	ethanol 96%	ZFMKTIS20962
ZFMK-TIS-20972	Araneae	Theridiidae	Steatoda bipunctata	female	juvenile	Austria		Hohe Tauern. Salzburg	12.73	47.12	21.9.2012	Freudenschuss. M.	Freudenschuss. M.	ethanol 96%	ZFMKTIS20972
ZFMK-TIS-20974	Araneae	Linyphiidae	Floronia bucculenta	male	adult	Germany	Nordrhein-Westfalen	Bonn. Bad Godesberg	7.15	50.69	21.8.2012	Huber. B.A.	Huber. B.A.	ethanol 96%	ZFMKTIS20974
ZFMK-TIS-20975	Araneae	Linyphiidae	Floronia bucculenta		adult	Germany	Nordrhein-Westfalen	Bonn. Bad Godesberg	7.15	50.69	21.8.2012	Huber. B.A.	Huber. B.A.	ethanol 96%	ZFMKTIS20975
ZFMK-TIS-20976	Araneae	Lycosidae	Xerolycosa nemoralis		adult	Austria		Hochbuchberg	14.31	47.92	30.08.2012	Huber. B.A.	Huber. B.A.	ethanol 96%	ZFMKTIS20976
ZFMK-TIS-20977	Araneae	Lycosidae	Xerolycosa nemoralis	male	adult	Austria		Hochbuchberg	14.31	47.92	30.08.2012	Huber. B.A.	Huber. B.A.	ethanol 96%	ZFMKTIS20977
ZFMK-TIS-20978	Araneae	Linyphiidae	Linyphia triangularis	male	adult	Germany	Nordrhein-Westfalen	Bonn. Bad Godesberg	7.15	50.69	29.8.2012	Huber. B.A.	Huber. B.A.	ethanol 96%	ZFMKTIS20978
ZFMK-TIS-20980	Araneae	Linyphiidae	Floronia bucculenta		adult	Germany	Nordrhein-Westfalen	Bonn. Röttgen	7.11	50.69	24.8.2012	Huber. B.A.	Huber. B.A.	ethanol 96%	ZFMKTIS20980
ZFMK-TIS-20981	Araneae	Linyphiidae	Floronia bucculenta		adult	Germany	Nordrhein-Westfalen	Bonn. Röttgen	7.11	50.69	24.8.2012	Huber. B.A.	Huber. B.A.	ethanol 96%	ZFMKTIS20981
ZFMK-TIS-20982	Araneae	Uloboridae	Uloborus plumipes		adult	Germany	Nordrhein-Westfalen	Bonn. Bad Godesberg	7.14	50.7	25.8.2012	Huber. B.A.	Huber. B.A.	ethanol 96%	ZFMKTIS20982
ZFMK-TIS-20986	Araneae	Theridiidae	Neottiura bimaculata		adult	Austria		Ramsau	14.24	47.85	30.08.2012	Huber. B.A.	Huber. B.A.	ethanol 96%	ZFMKTIS20986
ZFMK-TIS-20987	Araneae	Theridiidae	Neottiura bimaculata	female	adult	Austria		Ramsau	14.24	47.85	30.08.2012	Huber. B.A.	Huber. B.A.	ethanol 96%	ZFMKTIS20987
ZFMK-TIS-20988	Araneae	Araneidae	Argiope bruennichi	male	adult	Germany	Nordrhein-Westfalen	Bonn. Röttgen	7.11	50.69	24.8.2012	Huber. B.A.	Huber. B.A.	ethanol 96%	ZFMKTIS20988
ZFMK-TIS-20990	Araneae	Linyphiidae	Floronia bucculenta	male	adult	Austria		Walding. Oberösterreich	14.17	48.36	30.08.2012	Huber. B.A.	Huber. B.A.	ethanol 96%	ZFMKTIS20990
ZFMK-TIS-20991	Araneae	Linyphiidae	Floronia bucculenta		adult	Austria		Walding. Oberösterreich	14.17	48.36	30.08.2012	Huber. B.A.	Huber. B.A.	ethanol 96%	ZFMKTIS20991
ZFMK-TIS-21348	Araneae	Tetragnathidae	Meta menardi			Germany	Hessen	Hilgershausen	9.9	51.27	6.6.2012	Weigand. A.M.; Dörge. D.	Weigand. A.M.	ethanol 96%	ZFMKTIS21348
ZFMK-TIS-21349	Araneae	Nesticidae	Nesticus cellulanus			Germany	Saarland	Merzig	6.54	49.41	13.3.2011	Weber. D.	Weber. D.	ethanol 96%	ZFMKTIS21349
ZFMK-TIS-21352	Araneae	Nesticidae	Nesticus cellulanus			Luxembourg		Diekirch	5.98	50.1	11.6.2012	Weber. D.	Weber. D.	ethanol 96%	ZFMKTIS21352
ZFMK-TIS-21355	Araneae	Tetragnathidae	Meta menardi			Luxembourg		Diekirch	6.22	49.88	20.3.2011	Weber. D.	Weber. D.	ethanol 96%	ZFMKTIS21355
ZFMK-TIS-21357	Araneae	Tetragnathidae	Meta menardi			Germany	Bayern	Landreis Kelheim. Riedenburg. Essing	11.78	48.93	25.10.2012	Reip. H.	Reip. H.	ethanol 96%	ZFMKTIS21357
ZFMK-TIS-21358	Araneae	Tetragnathidae	Metellina merianae	male		Germany	Saarland	Saarbrücken	6.99	49.25	3.11.2012	Weber. D.	Weber. D.	ethanol 96%	ZFMKTIS21358
ZFMK-TIS-21361	Opiliones	Nemastomatidae	Mitostoma chrysomelas	female	adult	Luxembourg		Grevenmacher. Kelsbaach	6.44	49.68	30.7.2012	Weber. D.	Schönhofer. A.	ethanol 96%	ZFMKTIS21361
ZFMK-TIS-21364	Araneae	Nesticidae	Nesticus cellulanus			Luxembourg		Diekirch	5.98	50.1	19.3.2012	Weber. D.	Weber. D.	ethanol 96%	ZFMKTIS21364
ZFMK-TIS-21365	Araneae	Tetragnathidae	Metellina merianae			Germany	Thüringen	Kranichfeld. Hohenfeldern. Katzenberg	11.14	50.89	16.6.2012	Reip. H.	Weigand. A.M.	ethanol 96%	ZFMKTIS21365
ZFMK-TIS-21366	Araneae	Nesticidae	Nesticus cellulanus			Luxembourg		Diekirch	5.98	50.1	11.6.2012	Weber. D.	Weber. D.	ethanol 96%	ZFMKTIS21366
ZFMK-TIS-21367	Opiliones	Nemastomatidae	Paranemastoma quadripunctatum	female	adult	Germany	Saarland	Saarbrücken	7.12	49.24	18.11.2012	Weber. D.	Schönhofer. A.	ethanol 96%	ZFMKTIS21367
ZFMK-TIS-21372	Araneae	Tetragnathidae	Meta menardi			Germany	Bayern	Landreis Kelheim. Riedenburg. Essing	11.78	48.93	25.10.2012	Reip. H.	Reip. H.	ethanol 96%	ZFMKTIS21372
ZFMK-TIS-21373	Opiliones	Nemastomatidae	Nemastoma dentigerum	male	adult	Germany	Saarland	Reisberg	6.67	49.46	8.9.2012	Weber. D.	Schönhofer. A.	ethanol 96%	ZFMKTIS21373
ZFMK-TIS-21376	Araneae	Tetragnathidae	Metellina merianae			Luxembourg		Grevenmacher. Kelsbaach	6.44	49.68	30.7.2012	Weber. D.	Weber. D.	ethanol 96%	ZFMKTIS21376
ZFMK-TIS-21377	Araneae	Tetragnathidae	Meta menardi		juvenile	Luxembourg		Diekirch	5.98	50.1	19.3.2012	Weber. D.	Weber. D.	ethanol 96%	ZFMKTIS21377
ZFMK-TIS-21381	Araneae	Nesticidae	Nesticus cellulanus			Germany	Saarland	Saarbrücken	7.12	49.24	18.11.2012	Weber. D.	Weber. D.	ethanol 96%	ZFMKTIS21381
ZFMK-TIS-21383	Opiliones	Nemastomatidae	Paranemastoma quadripunctatum	male	adult	Germany	Saarland	Saarbrücken	7.12	49.24	18.11.2012	Weber. D.	Schönhofer. A.	ethanol 96%	ZFMKTIS21383
ZFMK-TIS-21385	Opiliones	Nemastomatidae	Mitostoma chrysomelas	male	adult	Luxembourg		Goesdorf	5.97	49.93	9.9.2012	Weber. D.	Schönhofer. A.	ethanol 96%	ZFMKTIS21385
ZFMK-TIS-21393	Opiliones	Nemastomatidae	Mitostoma chrysomelas	female	adult	Luxembourg		Grevenmacher. Kelsbaach	6.44	49.68	30.7.2012	Weber. D.	Schönhofer. A.	ethanol 96%	ZFMKTIS21393
ZFMK-TIS-21397	Araneae	Tetragnathidae	Metellina merianae			Germany	Thüringen	Kranichfeld. Hohenfeldern. Katzenberg	11.14	50.89	16.6.2012	Reip. H.	Weigand. A.M.	ethanol 96%	ZFMKTIS21397
ZFMK-TIS-21399	Araneae	Tetragnathidae	Meta menardi			Germany	Bayern	Landreis Kelheim. Riedenburg. Essing	11.78	48.93	25.10.2012	Reip. H.	Reip. H.	ethanol 96%	ZFMKTIS21399
ZFMK-TIS-21404	Opiliones	Nemastomatidae	Nemastoma bimaculatum	male	adult	Luxembourg		Diekirch	5.98	50.1	11.6.2012	Weber. D.	Muster. C.	ethanol 96%	ZFMKTIS21404
ZFMK-TIS-21405	Opiliones	Phalangiidae	Amilenus aurantiacus			Germany	Saarland	Saarbrücken	7.12	49.24	18.11.2012	Weber. D.	Schönhofer. A.; Weber. D.	ethanol 96%	ZFMKTIS21405
ZFMK-TIS-21406	Opiliones	Nemastomatidae	Paranemastoma quadripunctatum	female	adult	Germany	Saarland	Saarbrücken	6.99	49.25	3.11.2012	Weber. D.	Schönhofer. A.	ethanol 96%	ZFMKTIS21406
ZFMK-TIS-21408	Opiliones	Sclerosomatidae	Leiobunum religiosum		juvenile	Luxembourg		Wasserbillig	6.49	49.72	30.7.2012	Weber. D.	Muster. C.	ethanol 96%	ZFMKTIS21408
ZFMK-TIS-21412	Araneae	Linyphiidae	Porrhomma pygmaeum	male	adult	Germany	Schleswig-Holstein	Blankensee	10.7	53.79	6.9.2012	Lemke. M.	Krammer. H.-J.	ethanol 96%	ZFMKTIS21412
ZFMK-TIS-22184	Araneae	Linyphiidae	Oedothorax retusus	male	adult	Germany	Mecklenburg-Vorpommern	Rügen	13.4	54.28	1.5.2013	Muster. C.	Muster. C.	ethanol 96%	ZFMKTIS22184
ZFMK-TIS-22185	Araneae	Lycosidae	Pardosa amentata	male	adult	Germany	Mecklenburg-Vorpommern	Rügen	13.4	54.28	1.5.2013	Muster. C.	Muster. C.	ethanol 96%	ZFMKTIS22185
ZFMK-TIS-22186	Araneae	Linyphiidae	Porrhomma convexum	female	adult	Germany	Mecklenburg-Vorpommern	Rügen	13.67	54.52	25.4.2013	Muster. C.	Muster. C.	ethanol 96%	ZFMKTIS22186
ZFMK-TIS-22187	Araneae	Linyphiidae	Oedothorax apicatus	female	adult	Germany	Mecklenburg-Vorpommern	Rügen	13.67	54.52	25.4.2013	Muster. C.	Muster. C.	ethanol 96%	ZFMKTIS22187
ZFMK-TIS-22188	Araneae	Lycosidae	Pardosa hortensis	male	adult	Germany	Mecklenburg-Vorpommern	Rügen	13.67	54.52	25.4.2013	Muster. C.	Muster. C.	ethanol 96%	ZFMKTIS22188
ZFMK-TIS-22189	Araneae	Liocranidae	Liocranum rupicola	female	adult	Germany	Mecklenburg-Vorpommern	Rügen	13.42	54.34	15.4.2013	Muster. C.	Muster. C.	ethanol 96%	ZFMKTIS22189
ZFMK-TIS-22190	Araneae	Linyphiidae	Porrhomma pygmaeum	female	adult	Germany	Mecklenburg-Vorpommern	Rügen	13.47	54.33	3.2.2013	Muster. C.	Muster. C.	ethanol 96%	ZFMKTIS22190
ZFMK-TIS-22191	Araneae	Linyphiidae	Bathyphantes nigrinus	female	adult	Germany	Mecklenburg-Vorpommern	Rügen	13.47	54.33	3.2.2013	Muster. C.	Muster. C.	ethanol 96%	ZFMKTIS22191
ZFMK-TIS-22192	Araneae	Linyphiidae	Neriene clathrata	female	adult	Germany	Mecklenburg-Vorpommern	Rügen	13.47	54.33	3.2.2013	Muster. C.	Muster. C.	ethanol 96%	ZFMKTIS22192
ZFMK-TIS-22193	Araneae	Linyphiidae	Centromerita bicolor	male	adult	Germany	Mecklenburg-Vorpommern	Rügen	13.42	54.34	31.1.2013	Muster. C.	Muster. C.	ethanol 96%	ZFMKTIS22193
ZFMK-TIS-22194	Araneae	Linyphiidae	Walckenaeria nudipalpis	male	adult	Germany	Mecklenburg-Vorpommern	Rügen	13.42	54.34	31.1.2013	Muster. C.	Muster. C.	ethanol 96%	ZFMKTIS22194
ZFMK-TIS-22195	Araneae	Linyphiidae	Gonatium rubellum	female	adult	Germany	Sachsen	Leipzig	12.24	51.36	19.10.2012	Muster. C.	Muster. C.	ethanol 96%	ZFMKTIS22195
ZFMK-TIS-22196	Araneae	Linyphiidae	Walckenaeria alticeps	male	adult	Germany	Sachsen	Leipzig. Bienitz	12.24	51.35	19.10.2012	Muster. C.	Muster. C.	ethanol 96%	ZFMKTIS22196
ZFMK-TIS-22198	Araneae	Theridiidae	Steatoda bipunctata	female	adult	Germany	Mecklenburg-Vorpommern	Rügen	13.42	54.34	24.9.2012	Muster. C.	Muster. C.	ethanol 96%	ZFMKTIS22198
ZFMK-TIS-22199	Araneae	Linyphiidae	Tallusia experta	male	adult	Germany	Mecklenburg-Vorpommern	Rügen	13.42	54.34	18.10.2012	Muster. C.	Muster. C.	ethanol 96%	ZFMKTIS22199
ZFMK-TIS-22200	Araneae	Agelenidae	Coelotes terrestris	female	adult	Germany	Sachsen	Erzgebirge	12.92	50.54	21.10.2012	Muster. C.	Muster. C.	ethanol 96%	ZFMKTIS22200
ZFMK-TIS-22203	Araneae	Linyphiidae	Diplocephalus latifrons	male	adult	Germany	Sachsen	Erzgebirge	12.92	50.54	21.10.2012	Muster. C.	Muster. C.	ethanol 96%	ZFMKTIS22203
ZFMK-TIS-22204	Araneae	Linyphiidae	Diplocephalus latifrons	female	adult	Germany	Sachsen	Erzgebirge	12.92	50.54	21.10.2012	Muster. C.	Muster. C.	ethanol 96%	ZFMKTIS22204
ZFMK-TIS-22206	Araneae	Linyphiidae	Saaristoa firma	female	adult	Germany	Sachsen	Erzgebirge	12.92	50.54	21.10.2012	Muster. C.	Muster. C.	ethanol 96%	ZFMKTIS22206
ZFMK-TIS-22207	Araneae	Linyphiidae	Saaristoa firma	male	adult	Germany	Sachsen	Erzgebirge	12.92	50.54	21.10.2012	Muster. C.	Muster. C.	ethanol 96%	ZFMKTIS22207
ZFMK-TIS-22208	Araneae	Linyphiidae	Tapinocyba affinis	male	adult	Germany	Sachsen	Erzgebirge	12.92	50.54	21.10.2012	Muster. C.	Huber. B.A.	ethanol 96%	ZFMKTIS22208
ZFMK-TIS-22209	Araneae	Linyphiidae	Tapinocyba affinis	female	adult	Germany	Sachsen	Erzgebirge	12.92	50.54	21.10.2012	Muster. C.	Muster. C.	ethanol 96%	ZFMKTIS22209
ZFMK-TIS-22210	Araneae	Linyphiidae	Micrargus herbigradus	male	adult	Germany	Sachsen	Erzgebirge	12.92	50.54	21.10.2012	Muster. C.	Muster. C.	ethanol 96%	ZFMKTIS22210
ZFMK-TIS-22211	Araneae	Linyphiidae	Micrargus georgescuae	male	adult	Germany	Sachsen	Erzgebirge	12.92	50.54	21.10.2012	Muster. C.	Huber. B.A.	ethanol 96%	ZFMKTIS22211
ZFMK-TIS-22213	Araneae	Linyphiidae	Asthenargus helveticus	male	adult	Germany	Sachsen	Erzgebirge	12.92	50.54	21.10.2012	Muster. C.	Muster. C.	ethanol 96%	ZFMKTIS22213
ZFMK-TIS-22214	Araneae	Linyphiidae	Microneta viaria	male	adult	Germany	Sachsen	Erzgebirge	12.92	50.54	21.10.2012	Muster. C.	Muster. C.	ethanol 96%	ZFMKTIS22214
ZFMK-TIS-22215	Araneae	Linyphiidae	Microneta viaria	female	adult	Germany	Sachsen	Erzgebirge	12.92	50.54	21.10.2012	Muster. C.	Muster. C.	ethanol 96%	ZFMKTIS22215
ZFMK-TIS-22217	Araneae	Linyphiidae	Centromerus sylvaticus	female	adult	Germany	Sachsen	Erzgebirge	12.92	50.54	21.10.2012	Muster. C.	Muster. C.	ethanol 96%	ZFMKTIS22217
ZFMK-TIS-22218	Araneae	Linyphiidae	Walckenaeria obtusa	female	adult	Germany	Sachsen	Erzgebirge	12.92	50.54	21.10.2012	Muster. C.	Muster. C.	ethanol 96%	ZFMKTIS22218
ZFMK-TIS-22219	Araneae	Linyphiidae	Tenuiphantes alacris	male	adult	Germany	Sachsen	Erzgebirge	12.92	50.54	21.10.2012	Muster. C.	Muster. C.	ethanol 96%	ZFMKTIS22219
ZFMK-TIS-22220	Araneae	Linyphiidae	Tenuiphantes alacris	female	adult	Germany	Sachsen	Erzgebirge	12.92	50.54	21.10.2012	Muster. C.	Muster. C.	ethanol 96%	ZFMKTIS22220
ZFMK-TIS-22221	Araneae	Linyphiidae	Helophora insignis	male	adult	Germany	Sachsen	Erzgebirge	12.98	50.6	21.10.2012	Muster. C.	Muster. C.	ethanol 96%	ZFMKTIS22221
ZFMK-TIS-22222	Araneae	Linyphiidae	Helophora insignis	female	adult	Germany	Sachsen	Erzgebirge	12.98	50.6	21.10.2012	Muster. C.	Muster. C.	ethanol 96%	ZFMKTIS22222
ZFMK-TIS-22223	Opiliones	Nemastomatidae	Nemastoma triste	male	adult	Germany	Sachsen	Erzgebirge	12.92	50.54	21.10.2012	Muster. C.	Muster. C.	ethanol 96%	ZFMKTIS22223
ZFMK-TIS-22226	Araneae	Linyphiidae	Diplostyla concolor	female	adult	Germany	Sachsen	Erzgebirge	12.98	50.6	21.10.2012	Muster. C.	Muster. C.	ethanol 96%	ZFMKTIS22226
ZFMK-TIS-22227	Araneae	Linyphiidae	Bathyphantes nigrinus	male	adult	Germany	Sachsen	Erzgebirge	12.98	50.6	21.10.2012	Muster. C.	Muster. C.	ethanol 96%	ZFMKTIS22227
ZFMK-TIS-22228	Araneae	Linyphiidae	Bathyphantes nigrinus	male	adult	Germany	Sachsen	Erzgebirge	12.98	50.6	21.10.2012	Muster. C.	Muster. C.	ethanol 96%	ZFMKTIS22228
ZFMK-TIS-22229	Araneae	Linyphiidae	Tenuiphantes tenebricola	female	adult	Germany	Sachsen	Erzgebirge	12.98	50.6	21.10.2012	Muster. C.	Muster. C.	ethanol 96%	ZFMKTIS22229
ZFMK-TIS-22230	Araneae	Linyphiidae	Improphantes nitidus	female	adult	Germany	Sachsen	Erzgebirge	12.98	50.6	21.10.2012	Muster. C.	Muster. C.	ethanol 96%	ZFMKTIS22230
ZFMK-TIS-22232	Araneae	Linyphiidae	Erigonella hiemalis	male	adult	Germany	Sachsen	Gelenau	12.93	50.71	20.10.2012	Muster. C.	Muster. C.	ethanol 96%	ZFMKTIS22232
ZFMK-TIS-22234	Araneae	Linyphiidae	Tapinocyba insecta	female	adult	Germany	Sachsen	Gelenau	12.93	50.71	20.10.2012	Muster. C.	Muster. C.	ethanol 96%	ZFMKTIS22234
ZFMK-TIS-22235	Araneae	Hahniidae	Hahnia pusilla	male	adult	Germany	Sachsen	Gelenau	12.93	50.71	20.10.2012	Muster. C.	Muster. C.	ethanol 96%	ZFMKTIS22235
ZFMK-TIS-22237	Araneae	Tetragnathidae	Metellina mengei	female	adult	Germany	Sachsen	Erzgebirge	12.93	50.71	20.10.2012	Muster. C.	Muster. C.	ethanol 96%	ZFMKTIS22237
ZFMK-TIS-22238	Araneae	Tetragnathidae	Metellina segmentata	male	adult	Germany	Sachsen	Leipzig. Bienitz	12.24	51.35	19.10.2012	Muster. C.	Muster. C.	ethanol 96%	ZFMKTIS22238
ZFMK-TIS-22240	Opiliones	Phalangiidae	Oligolophus tridens	female	adult	Germany	Sachsen	Leipzig. Bienitz	12.24	51.35	19.10.2012	Muster. C.	Muster. C.	ethanol 96%	ZFMKTIS22240
ZFMK-TIS-22241	Araneae	Linyphiidae	Linyphia triangularis	female	adult	Germany	Sachsen	Leipzig. Bienitz	12.24	51.35	19.10.2012	Muster. C.	Muster. C.	ethanol 96%	ZFMKTIS22241
ZFMK-TIS-22242	Opiliones	Sclerosomatidae	Astrobunus laevipes	male	adult	Germany	Sachsen	Leipzig. Bienitz	12.24	51.35	19.10.2012	Muster. C.	Muster. C.	ethanol 96%	ZFMKTIS22242
ZFMK-TIS-22243	Araneae	Tetragnathidae	Pachygnatha degeeri	male	adult	Germany	Sachsen	Leipzig. Bienitz	12.24	51.35	19.10.2012	Muster. C.	Muster. C.	ethanol 96%	ZFMKTIS22243
ZFMK-TIS-22244	Araneae	Tetragnathidae	Pachygnatha degeeri	male	adult	Germany	Sachsen	Leipzig. Bienitz	12.24	51.35	19.10.2012	Muster. C.	Muster. C.	ethanol 96%	ZFMKTIS22244
ZFMK-TIS-22245	Araneae	Clubionidae	Clubiona terrestris	female	adult	Germany	Sachsen	Leipzig. Bienitz	12.24	51.35	19.10.2012	Muster. C.	Muster. C.	ethanol 96%	ZFMKTIS22245
ZFMK-TIS-22246	Opiliones	Nemastomatidae	Nemastoma dentigerum	male	adult	Germany	Sachsen	Leipzig. Bienitz	12.24	51.35	19.10.2012	Muster. C.	Muster. C.	ethanol 96%	ZFMKTIS22246
ZFMK-TIS-22247	Opiliones	Nemastomatidae	Nemastoma dentigerum	male	adult	Germany	Sachsen	Leipzig. Bienitz	12.24	51.35	19.10.2012	Muster. C.	Muster. C.	ethanol 96%	ZFMKTIS22247
ZFMK-TIS-22258	Araneae	Lycosidae	Pardosa agrestis	male	adult	Germany	Mecklenburg-Vorpommern	Rügen	13.21	54.47	6.5.2013	Muster. C.	Muster. C.	ethanol 96%	ZFMKTIS22258
ZFMK-TIS-22259	Araneae	Linyphiidae	Bathyphantes gracilis	male	adult	Germany	Mecklenburg-Vorpommern	Rügen	13.21	54.47	6.5.2013	Muster. C.	Muster. C.	ethanol 96%	ZFMKTIS22259
ZFMK-TIS-22260	Araneae	Linyphiidae	Silometopus reussi	male	adult	Germany	Mecklenburg-Vorpommern	Rügen	13.21	54.47	6.5.2013	Muster. C.	Muster. C.	ethanol 96%	ZFMKTIS22260
ZFMK-TIS-22261	Araneae	Linyphiidae	Diplostyla concolor	female	adult	Germany	Mecklenburg-Vorpommern	Rügen	13.21	54.47	6.5.2013	Muster. C.	Muster. C.	ethanol 96%	ZFMKTIS22261
ZFMK-TIS-22262	Araneae	Linyphiidae	Kaestneria pullata	female	adult	Germany	Mecklenburg-Vorpommern	Rügen	13.21	54.47	6.5.2013	Muster. C.	Muster. C.	ethanol 96%	ZFMKTIS22262
ZFMK-TIS-22263	Araneae	Linyphiidae	Hypomma bituberculatum	male	adult	Germany	Mecklenburg-Vorpommern	Rügen	13.21	54.47	6.5.2013	Muster. C.	Muster. C.	ethanol 96%	ZFMKTIS22263
ZFMK-TIS-22264	Araneae	Linyphiidae	Erigone longipalpis	female	adult	Germany	Mecklenburg-Vorpommern	Rügen	13.21	54.47	6.5.2013	Muster. C.	Muster. C.	ethanol 96%	ZFMKTIS22264
ZFMK-TIS-22265	Araneae	Lycosidae	Pardosa saltans	male	adult	Germany	Mecklenburg-Vorpommern	Rügen	13.32	54.33	10.5.2013	Muster. C.	Blick. T.	ethanol 96%	ZFMKTIS22265
ZFMK-TIS-22267	Araneae	Linyphiidae	Erigonella hiemalis	female	adult	Germany	Mecklenburg-Vorpommern	Rügen	13.38	54.68	12.5.2013	Muster. C.	Muster. C.	ethanol 96%	ZFMKTIS22267
ZFMK-TIS-22268	Araneae	Linyphiidae	Dicymbium tibiale	male	adult	Germany	Mecklenburg-Vorpommern	Rügen	13.38	54.68	12.5.2013	Muster. C.	Muster. C.	ethanol 96%	ZFMKTIS22268
ZFMK-TIS-22269	Araneae	Linyphiidae	Minyriolus pusillus	male	adult	Germany	Mecklenburg-Vorpommern	Rügen	13.38	54.68	12.5.2013	Muster. C.	Muster. C.	ethanol 96%	ZFMKTIS22269
ZFMK-TIS-22270	Araneae	Lycosidae	Pardosa agrestis	male	adult	Germany	Mecklenburg-Vorpommern	Rügen	13.38	54.68	12.5.2013	Muster. C.	Muster. C.	ethanol 96%	ZFMKTIS22270
ZFMK-TIS-22271	Araneae	Lycosidae	Pardosa palustris	male	adult	Germany	Mecklenburg-Vorpommern	Rügen	13.45	54.32	15.5.2013	Muster. C.	Muster. C.	ethanol 96%	ZFMKTIS22271
ZFMK-TIS-22272	Araneae	Araneidae	Hypsosinga heri	male	adult	Germany	Mecklenburg-Vorpommern	Recknitz-Trebeltal	13.75	54.1	23.5.2013	Muster. C.	Muster. C.	ethanol 96%	ZFMKTIS22272
ZFMK-TIS-22273	Araneae	Linyphiidae	Microlinyphia impigra	female	adult	Germany	Mecklenburg-Vorpommern	Recknitz-Trebeltal	13.75	54.1	23.5.2013	Muster. C.	Muster. C.	ethanol 96%	ZFMKTIS22273
ZFMK-TIS-22274	Araneae	Linyphiidae	Savignia frontata	male	adult	Germany	Mecklenburg-Vorpommern	Recknitz-Trebeltal	13.75	54.1	23.5.2013	Muster. C.	Muster. C.	ethanol 96%	ZFMKTIS22274
ZFMK-TIS-22275	Araneae	Linyphiidae	Gnathonarium dentatum	male	adult	Germany	Mecklenburg-Vorpommern	Recknitz-Trebeltal	13.75	54.1	23.5.2013	Muster. C.	Muster. C.	ethanol 96%	ZFMKTIS22275
ZFMK-TIS-22276	Araneae	Amaurobiidae	Amaurobius similis	female	adult	Germany	Niedersachsen	Deinste	9.46	53.53	24.5.2013	Muster. C.	Muster. C.	ethanol 96%	ZFMKTIS22276
ZFMK-TIS-22277	Araneae	Theridiidae	Robertus lividus	male	adult	Germany	Niedersachsen	Deinste	9.46	53.53	24.5.2013	Muster. C.	Muster. C.	ethanol 96%	ZFMKTIS22277
ZFMK-TIS-22278	Araneae	Lycosidae	Pardosa lugubris	male	adult	Germany	Niedersachsen	Deinste	9.46	53.53	24.5.2013	Muster. C.	Blick. T.	ethanol 96%	ZFMKTIS22278
ZFMK-TIS-22279	Araneae	Linyphiidae	Tiso vagans	male	adult	Germany	Niedersachsen	Deinste	9.46	53.53	24.5.2013	Muster. C.	Muster. C.	ethanol 96%	ZFMKTIS22279
ZFMK-TIS-22280	Araneae	Linyphiidae	Microneta viaria	male	adult	Germany	Niedersachsen	Deinste	9.46	53.53	24.5.2013	Muster. C.	Muster. C.	ethanol 96%	ZFMKTIS22280
ZFMK-TIS-22281	Araneae	Linyphiidae	Diplostyla concolor	male	adult	Germany	Niedersachsen	Deinste	9.46	53.53	24.5.2013	Muster. C.	Muster. C.	ethanol 96%	ZFMKTIS22281
ZFMK-TIS-22282	Araneae	Linyphiidae	Diplocephalus picinus	female	adult	Germany	Niedersachsen	Deinste	9.46	53.53	24.5.2013	Muster. C.	Muster. C.	ethanol 96%	ZFMKTIS22282
ZFMK-TIS-22283	Araneae	Linyphiidae	Troxochrus scabriculus	male	adult	Germany	Niedersachsen	Deinste	9.46	53.53	24.5.2013	Muster. C.	Muster. C.	ethanol 96%	ZFMKTIS22283
ZFMK-TIS-22284	Araneae	Lycosidae	Alopecosa cuneata	female	adult	Germany	Sachsen	Dübener Heide	12.7	51.58	31.5.2013	Muster. C.	Blick. T.	ethanol 96%	ZFMKTIS22284
ZFMK-TIS-22285	Araneae	Araneidae	Mangora acalypha	female	adult	Germany	Sachsen	Dübener Heide	12.7	51.58	31.5.2013	Muster. C.	Muster. C.	ethanol 96%	ZFMKTIS22285
ZFMK-TIS-22286	Araneae	Lycosidae	Arctosa leopardus	male	adult	Germany	Sachsen	Dübener Heide	12.7	51.58	31.5.2013	Muster. C.	Muster. C.	ethanol 96%	ZFMKTIS22286
ZFMK-TIS-22287	Araneae	Linyphiidae	Neriene radiata	female	adult	Germany	Sachsen	Dübener Heide	12.7	51.58	31.5.2013	Muster. C.	Muster. C.	ethanol 96%	ZFMKTIS22287
ZFMK-TIS-22288	Araneae	Araneidae	Larinioides cornutus	female	adult	Germany	Sachsen	Dübener Heide	12.7	51.58	31.5.2013	Muster. C.	Muster. C.	ethanol 96%	ZFMKTIS22288
ZFMK-TIS-22289	Araneae	Salticidae	Neon reticulatus	male	adult	Germany	Sachsen	Dübener Heide	12.7	51.58	31.5.2013	Muster. C.	Muster. C.	ethanol 96%	ZFMKTIS22289
ZFMK-TIS-22290	Araneae	Theridiidae	Parasteatoda lunata	male	juvenile	Germany	Sachsen	Dübener Heide	12.7	51.58	31.5.2013	Muster. C.	Astrin. J.J.	ethanol 96%	ZFMKTIS22290
ZFMK-TIS-22349	Araneae	Lycosidae	Pardosa saltans	male	adult	Germany	Schleswig-Holstein	Lübeck	10.76	53.87	5.10.2013	Lemke. M.	Lemke. M.	ethanol 96%	ZFMKTIS22349
ZFMK-TIS-22350	Araneae	Linyphiidae	Saloca diceros	male	adult	Germany	Schleswig-Holstein	Groß Parin	10.71	53.95	12.10.2012	Lemke. M.	Lemke. M.	ethanol 96%	ZFMKTIS22350
ZFMK-TIS-22352	Araneae	Theridiidae	Asagena phalerata	female	juvenile	Germany	Schleswig-Holstein	Kreis Segeberg	10.15	53.91	22.10.2012	Lemke. M.	Lemke. M.	ethanol 96%	ZFMKTIS22352
ZFMK-TIS-22353	Araneae	Hahniidae	Hahnia ononidum	female	adult	Germany	Schleswig-Holstein	Groß Parin	10.71	53.95	4.7.2013	Lemke. M.	Lemke. M.	ethanol 96%	ZFMKTIS22353
ZFMK-TIS-2258	Araneae	Linyphiidae	Tenuiphantes flavipes	female	adult	Germany	Schleswig-Holstein	Neversdorf	10.3	53.86	21.4.2012	Lemke. M.	Lemke. M.	ethanol 96%	ZFMKTIS2258
ZFMK-TIS-2259	Araneae	Linyphiidae	Linyphia hortensis	male	adult	Germany	Schleswig-Holstein	Neversdorf	10.3	53.86	21.4.2012	Lemke. M.	Lemke. M.	ethanol 96%	ZFMKTIS2259
ZFMK-TIS-2261	Araneae	Linyphiidae	Macrargus rufus	female	adult	Germany	Schleswig-Holstein	Hammer	10.65	53.64	29.4.2012	Lemke. M.	Lemke. M.	ethanol 96%	ZFMKTIS2261
ZFMK-TIS-2263	Araneae	Clubionidae	Clubiona terrestris	female	adult	Germany	Schleswig-Holstein	Hammer	10.65	53.64	29.4.2012	Lemke. M.	Lemke. M.	ethanol 96%	ZFMKTIS2263
ZFMK-TIS-2264	Araneae	Anyphaenidae	Anyphaena accentuata	male	adult	Germany	Schleswig-Holstein	Glinde	10.23	53.55	29.4.2012	Lemke. M.	Lemke. M.	ethanol 96%	ZFMKTIS2264
ZFMK-TIS-2265	Araneae	Theridiidae	Paidiscura pallens	male	adult	Germany	Schleswig-Holstein	Glinde	10.23	53.55	29.4.2012	Lemke. M.	Lemke. M.	ethanol 96%	ZFMKTIS2265
ZFMK-TIS-2266	Araneae	Araneidae	Araneus sturmi	female	adult	Germany	Schleswig-Holstein	Glinde	10.23	53.55	29.4.2012	Lemke. M.	Lemke. M.	ethanol 96%	ZFMKTIS2266
ZFMK-TIS-2267	Araneae	Thomisidae	Xysticus cristatus	male	adult	Germany	Schleswig-Holstein	Glinde	10.23	53.55	29.4.2012	Lemke. M.	Lemke. M.	ethanol 96%	ZFMKTIS2267
ZFMK-TIS-2268	Araneae	Salticidae	Synageles venator	male	adult	Germany	Schleswig-Holstein	Glinde	10.23	53.55	29.4.2012	Lemke. M.	Lemke. M.	ethanol 96%	ZFMKTIS2268
ZFMK-TIS-2269	Araneae	Linyphiidae	Tenuiphantes tenebricola	female	adult	Germany	Schleswig-Holstein	Reinbek	10.27	53.56	29.4.2012	Lemke. M.	Muster. C.	ethanol 96%	ZFMKTIS2269
ZFMK-TIS-2270	Araneae	Araneidae	Araneus sturmi	male	adult	Germany	Schleswig-Holstein	Hammer	10.65	53.64	29.4.2012	Lemke. M.	Lemke. M.	ethanol 96%	ZFMKTIS2270
ZFMK-TIS-22707	Opiliones	Nemastomatidae	Paranemastoma quadripunctatum			Germany	Saarland	Kirkel	7.21	49.29	26.11.2012	Weber. D.	Weber. D.	ethanol 96%	ZFMKTIS22707
ZFMK-TIS-2271	Araneae	Lycosidae	Alopecosa pulverulenta	female	adult	Germany	Schleswig-Holstein	Panten. Herzogtum-Lauenburg	10.64	53.66	29.4.2012	Lemke. M.	Blick. T.	ethanol 96%	ZFMKTIS2271
ZFMK-TIS-22712	Araneae	Araneidae	Nuctenea umbratica	male	adult	Germany	Nordrhein-Westfalen	Rheinbach. Rhein-Sieg-Kreis	6.95	50.62	30.6.2013	Löhrer. H.	Krammer. H.-J.	ethanol 96%	ZFMKTIS22712
ZFMK-TIS-22724	Araneae	Salticidae	Macaroeris nidicolens	male	adult	Germany	Baden-Württemberg	Hirschberg-Leutershausen	8.67	49.5	1.8.2012	Wunderlich. J.	Wunderlich. J.	ethanol 96%	ZFMKTIS22724
ZFMK-TIS-2273	Araneae	Clubionidae	Clubiona comta	male	adult	Germany	Schleswig-Holstein	Panten. Herzogtum-Lauenburg	10.64	53.66	29.4.2012	Lemke. M.	Lemke. M.	ethanol 96%	ZFMKTIS2273
ZFMK-TIS-2274	Araneae	Salticidae	Euophrys frontalis	male	adult	Germany	Schleswig-Holstein	Panten. Herzogtum-Lauenburg	10.64	53.66	29.4.2012	Lemke. M.	Lemke. M.	ethanol 96%	ZFMKTIS2274
ZFMK-TIS-2275	Araneae	Salticidae	Evarcha falcata	male	adult	Germany	Schleswig-Holstein	Panten. Herzogtum-Lauenburg	10.64	53.66	29.4.2012	Lemke. M.	Lemke. M.	ethanol 96%	ZFMKTIS2275
ZFMK-TIS-2277	Araneae	Linyphiidae	Walckenaeria cucullata	female	adult	Germany	Schleswig-Holstein	Panten. Herzogtum-Lauenburg	10.64	53.66	29.4.2012	Lemke. M.	Lemke. M.	ethanol 96%	ZFMKTIS2277
ZFMK-TIS-2278	Araneae	Philodromidae	Tibellus oblongus	male	adult	Germany	Schleswig-Holstein	Panten. Herzogtum-Lauenburg	10.64	53.66	29.4.2012	Lemke. M.	Lemke. M.	ethanol 96%	ZFMKTIS2278
ZFMK-TIS-2279	Araneae	Gnaphosidae	Haplodrassus silvestris	male	adult	Germany	Schleswig-Holstein	Panten. Herzogtum-Lauenburg	10.64	53.66	29.4.2012	Lemke. M.	Lemke. M.	ethanol 96%	ZFMKTIS2279
ZFMK-TIS-2280	Araneae	Dictynidae	Nigma flavescens	male	adult	Germany	Schleswig-Holstein	Panten. Herzogtum-Lauenburg	10.64	53.66	29.4.2012	Lemke. M.	Blick. T.	ethanol 96%	ZFMKTIS2280
ZFMK-TIS-2281	Araneae	Linyphiidae	Gongylidium rufipes	female	adult	Germany	Schleswig-Holstein	Panten. Herzogtum-Lauenburg	10.64	53.66	29.4.2012	Lemke. M.	Lemke. M.	ethanol 96%	ZFMKTIS2281
ZFMK-TIS-2282	Araneae	Salticidae	Heliophanus cupreus	male	adult	Germany	Schleswig-Holstein	Panten. Herzogtum-Lauenburg	10.64	53.66	29.4.2012	Lemke. M.	Lemke. M.	ethanol 96%	ZFMKTIS2282
ZFMK-TIS-2283	Araneae	Clubionidae	Clubiona reclusa	male	adult	Germany	Schleswig-Holstein	Schleswig-Flensburg	10.65	53.83	11.5.2012	Lemke. M.	Muster. C.	ethanol 96%	ZFMKTIS2283
ZFMK-TIS-2284	Araneae	Hahniidae	Hahnia montana	female	adult	Germany	Schleswig-Holstein	Schleswig-Flensburg	9.51	54.56	8.5.2012	Lemke. M.	Lemke. M.	ethanol 96%	ZFMKTIS2284
ZFMK-TIS-2287	Araneae	Salticidae	Neon reticulatus	male	adult	Germany	Schleswig-Holstein	Schleswig-Flensburg	9.51	54.56	8.5.2012	Lemke. M.	Lemke. M.	ethanol 96%	ZFMKTIS2287
ZFMK-TIS-2288	Araneae	Linyphiidae	Pityohyphantes phrygianus	female	adult	Germany	Schleswig-Holstein	Schleswig-Flensburg	9.51	54.56	8.5.2012	Lemke. M.	Lemke. M.	ethanol 96%	ZFMKTIS2288
ZFMK-TIS-2289	Araneae	Araneidae	Agalenatea redii	female	adult	Germany	Schleswig-Holstein	Schleswig-Flensburg	9.51	54.56	8.5.2012	Lemke. M.	Lemke. M.	ethanol 96%	ZFMKTIS2289
ZFMK-TIS-2290	Araneae	Amaurobiidae	Amaurobius similis	female	adult	Germany	Schleswig-Holstein	Schleswig-Flensburg	9.84	54.64	10.5.2012	Lemke. M.	Lemke. M.	ethanol 96%	ZFMKTIS2290
ZFMK-TIS-2291	Araneae	Anyphaenidae	Anyphaena accentuata		adult	Germany	Schleswig-Holstein	Schleswig-Flensburg	9.69	54.68	8.5.2012	Lemke. M.	Lemke. M.	ethanol 96%	ZFMKTIS2291
ZFMK-TIS-2292	Araneae	Tetragnathidae	Metellina merianae	female	adult	Germany	Schleswig-Holstein	Schleswig-Flensburg	9.69	54.68	8.5.2012	Lemke. M.	Lemke. M.	ethanol 96%	ZFMKTIS2292
ZFMK-TIS-2293	Araneae	Linyphiidae	Diplostyla concolor	male	adult	Germany	Schleswig-Holstein	Schleswig-Flensburg	9.69	54.68	8.5.2012	Lemke. M.	Lemke. M.	ethanol 96%	ZFMKTIS2293
ZFMK-TIS-2294	Araneae	Linyphiidae	Neriene montana	female	adult	Germany	Schleswig-Holstein	Schleswig-Flensburg	9.69	54.68	8.5.2012	Lemke. M.	Lemke. M.	ethanol 96%	ZFMKTIS2294
ZFMK-TIS-2295	Araneae	Linyphiidae	Walckenaeria cucullata	male	adult	Germany	Schleswig-Holstein	Schleswig-Flensburg	9.6	54.58	6.5.2012	Lemke. M.	Lemke. M.	ethanol 96%	ZFMKTIS2295
ZFMK-TIS-2296	Araneae	Thomisidae	Xysticus cristatus	male	adult	Germany	Schleswig-Holstein	Schleswig-Flensburg	9.6	54.58	6.5.2012	Lemke. M.	Muster. C.	ethanol 96%	ZFMKTIS2296
ZFMK-TIS-2297	Araneae	Linyphiidae	Tenuiphantes flavipes	male	adult	Germany	Schleswig-Holstein	Schleswig-Flensburg	9.6	54.58	6.5.2012	Lemke. M.	Lemke. M.	ethanol 96%	ZFMKTIS2297
ZFMK-TIS-2298	Araneae	Salticidae	Neon reticulatus	female	adult	Germany	Schleswig-Holstein	Schleswig-Flensburg	9.6	54.58	6.5.2012	Lemke. M.	Lemke. M.	ethanol 96%	ZFMKTIS2298
ZFMK-TIS-2301	Araneae	Clubionidae	Clubiona terrestris	male	adult	Germany	Schleswig-Holstein	Schleswig-Flensburg	9.79	54.67	6.5.2012	Lemke. M.	Lemke. M.	ethanol 96%	ZFMKTIS2301
ZFMK-TIS-2302	Araneae	Linyphiidae	Linyphia hortensis	female	adult	Germany	Schleswig-Holstein	Schleswig-Flensburg	9.79	54.67	6.5.2012	Lemke. M.	Lemke. M.	ethanol 96%	ZFMKTIS2302
ZFMK-TIS-2306	Araneae	Tetragnathidae	Metellina mengei	male	adult	Germany	Schleswig-Holstein	Schleswig-Flensburg	9.79	54.67	6.5.2012	Lemke. M.	Lemke. M.	ethanol 96%	ZFMKTIS2306
ZFMK-TIS-2307	Araneae	Linyphiidae	Neriene peltata	male	adult	Germany	Schleswig-Holstein	Schleswig-Flensburg	9.79	54.67	6.5.2012	Lemke. M.	Lemke. M.	ethanol 96%	ZFMKTIS2307
ZFMK-TIS-2308	Araneae	Linyphiidae	Bathyphantes nigrinus	female	adult	Germany	Schleswig-Holstein	Schleswig-Flensburg	9.79	54.67	6.5.2012	Lemke. M.	Lemke. M.	ethanol 96%	ZFMKTIS2308
ZFMK-TIS-2310	Araneae	Hahniidae	Hahnia pusilla	female	adult	Germany	Schleswig-Holstein	Schleswig-Flensburg	9.86	54.72	7.5.2012	Lemke. M.	Lemke. M.	ethanol 96%	ZFMKTIS2310
ZFMK-TIS-2311	Araneae	Linyphiidae	Gongylidium rufipes	female	adult	Germany	Schleswig-Holstein	Schleswig-Flensburg	9.79	54.6	7.5.2012	Lemke. M.	Lemke. M.	ethanol 96%	ZFMKTIS2311
ZFMK-TIS-2312	Araneae	Linyphiidae	Tenuiphantes tenebricola	female	adult	Germany	Schleswig-Holstein	Schleswig-Flensburg	9.79	54.6	7.5.2012	Lemke. M.	Muster. C.	ethanol 96%	ZFMKTIS2312
ZFMK-TIS-2314	Araneae	Clubionidae	Clubiona lutescens	male	adult	Germany	Schleswig-Holstein	Schleswig-Flensburg	10	54.56	7.5.2012	Lemke. M.	Lemke. M.	ethanol 96%	ZFMKTIS2314
ZFMK-TIS-2315	Araneae	Linyphiidae	Erigone arctica	male	adult	Germany	Schleswig-Holstein	Schleswig-Flensburg	10	54.71	7.5.2012	Lemke. M.	Krammer. H.-J.	ethanol 96%	ZFMKTIS2315
ZFMK-TIS-2317	Araneae	Thomisidae	Xysticus kochi	male	adult	Germany	Schleswig-Holstein	Schleswig-Flensburg	9.45	54.69	7.5.2012	Lemke. M.	Lemke. M.	ethanol 96%	ZFMKTIS2317
ZFMK-TIS-2318	Araneae	Agelenidae	Coelotes terrestris	female	adult	Germany	Schleswig-Holstein	Schleswig-Flensburg	9.45	54.69	7.5.2012	Lemke. M.	Lemke. M.	ethanol 96%	ZFMKTIS2318
ZFMK-TIS-2319	Araneae	Clubionidae	Clubiona phragmitis	male	adult	Germany	Schleswig-Holstein	Schleswig-Flensburg	9.98	54.74	8.5.2012	Lemke. M.	Lemke. M.	ethanol 96%	ZFMKTIS2319
ZFMK-TIS-2320	Araneae	Clubionidae	Clubiona reclusa	male	adult	Germany	Schleswig-Holstein	Schleswig-Flensburg	9.98	54.74	8.5.2012	Lemke. M.	Muster. C.	ethanol 96%	ZFMKTIS2320
ZFMK-TIS-2322	Araneae	Linyphiidae	Dismodicus bifrons	male	adult	Germany	Schleswig-Holstein	Schleswig-Flensburg	9.98	54.74	8.5.2012	Lemke. M.	Lemke. M.	ethanol 96%	ZFMKTIS2322
ZFMK-TIS-2323	Araneae	Theridiidae	Episinus angulatus	male	adult	Germany	Schleswig-Holstein	Schleswig-Flensburg	9.98	54.74	8.5.2012	Lemke. M.	Lemke. M.	ethanol 96%	ZFMKTIS2323
ZFMK-TIS-2325	Araneae	Clubionidae	Clubiona pallidula	male	adult	Germany	Schleswig-Holstein	Schleswig-Flensburg	9.98	54.74	8.5.2012	Lemke. M.	Lemke. M.	ethanol 96%	ZFMKTIS2325
ZFMK-TIS-2326	Araneae	Lycosidae	Arctosa cinerea	female	adult	Germany	Schleswig-Holstein	Schleswig-Flensburg	9.91	54.8	9.5.2012	Lemke. M.	Lemke. M.	ethanol 96%	ZFMKTIS2326
ZFMK-TIS-2328	Araneae	Thomisidae	Xysticus ulmi	male	adult	Germany	Schleswig-Holstein	Schleswig-Flensburg	9.55	54.58	10.5.2012	Lemke. M.	Lemke. M.	ethanol 96%	ZFMKTIS2328
ZFMK-TIS-2329	Araneae	Araneidae	Singa hamata	female	adult	Germany	Schleswig-Holstein	Schleswig-Flensburg	9.55	54.58	10.5.2012	Lemke. M.	Lemke. M.	ethanol 96%	ZFMKTIS2329
ZFMK-TIS-2331	Araneae	Theridiidae	Theridion mystaceum	female	adult	Germany	Schleswig-Holstein	Schleswig-Flensburg	9.94	54.66	9.5.2012	Lemke. M.	Lemke. M.	ethanol 96%	ZFMKTIS2331
ZFMK-TIS-2332	Araneae	Araneidae	Zygiella x-notata	female	adult	Germany	Schleswig-Holstein	Schleswig-Flensburg	9.94	54.66	9.5.2012	Lemke. M.	Lemke. M.	ethanol 96%	ZFMKTIS2332
ZFMK-TIS-2333	Araneae	Agelenidae	Tegenaria ferruginea	female	adult	Germany	Schleswig-Holstein	Schleswig-Flensburg	9.94	54.66	9.5.2012	Lemke. M.	Huber. B.A.	ethanol 96%	ZFMKTIS2333
ZFMK-TIS-2334	Araneae	Agelenidae	Eratigena atrica	female	adult	Germany	Schleswig-Holstein	Schleswig-Flensburg	9.94	54.66	9.5.2012	Lemke. M.	Huber. B.A.	ethanol 96%	ZFMKTIS2334
ZFMK-TIS-2335	Araneae	Theridiidae	Euryopis flavomaculata	male	adult	Germany	Schleswig-Holstein	Schleswig-Flensburg	10.69	53.79	19.5.2012	Lemke. M.	Lemke. M.	ethanol 96%	ZFMKTIS2335
ZFMK-TIS-2337	Araneae	Theridiidae	Simitidion simile	male	adult	Germany	Schleswig-Holstein	Schleswig-Flensburg	10.69	53.79	19.5.2012	Lemke. M.	Lemke. M.	ethanol 96%	ZFMKTIS2337
ZFMK-TIS-2339	Araneae	Salticidae	Heliophanus cupreus	male	adult	Germany	Schleswig-Holstein	Schleswig-Flensburg	10.69	53.79	19.5.2012	Lemke. M.	Lemke. M.	ethanol 96%	ZFMKTIS2339
ZFMK-TIS-2340	Araneae	Theridiidae	Phylloneta sisyphia	male	adult	Germany	Schleswig-Holstein	Schleswig-Flensburg	10.69	53.79	19.5.2012	Lemke. M.	Lemke. M.	ethanol 96%	ZFMKTIS2340
ZFMK-TIS-2341	Araneae	Philodromidae	Philodromus cespitum	male	adult	Germany	Schleswig-Holstein	Schleswig-Flensburg	10.69	53.79	19.5.2012	Lemke. M.	Lemke. M.	ethanol 96%	ZFMKTIS2341
ZFMK-TIS-2342	Araneae	Thomisidae	Xysticus lanio	male	adult	Germany	Schleswig-Holstein	Schleswig-Flensburg	10.69	53.79	19.5.2012	Lemke. M.	Lemke. M.	ethanol 96%	ZFMKTIS2342
ZFMK-TIS-2343	Araneae	Dictynidae	Lathys humilis	female	adult	Germany	Schleswig-Holstein	Schleswig-Flensburg	10.77	53.87	20.5.2012	Lemke. M.	Lemke. M.	ethanol 96%	ZFMKTIS2343
ZFMK-TIS-2344	Araneae	Miturgidae	Zora spinimana	female	adult	Germany	Schleswig-Holstein	Schleswig-Flensburg	10.77	53.87	20.5.2012	Lemke. M.	Lemke. M.	ethanol 96%	ZFMKTIS2344
ZFMK-TIS-2345	Araneae	Theridiidae	Platnickina tincta	male	adult	Germany	Schleswig-Holstein	Schleswig-Flensburg	10.77	53.87	20.5.2012	Lemke. M.	Lemke. M.	ethanol 96%	ZFMKTIS2345
ZFMK-TIS-2347	Araneae	Dictynidae	Dictyna pusilla	female	adult	Germany	Schleswig-Holstein	Schleswig-Flensburg	10.77	53.87	20.5.2012	Lemke. M.	Muster. C.	ethanol 96%	ZFMKTIS2347
ZFMK-TIS-2348	Araneae	Linyphiidae	Hypomma cornutum	male	adult	Germany	Schleswig-Holstein	Schleswig-Flensburg	10.77	53.87	20.5.2012	Lemke. M.	Lemke. M.	ethanol 96%	ZFMKTIS2348
ZFMK-TIS-2349	Araneae	Pisauridae	Pisaura mirabilis	male	adult	Germany	Schleswig-Holstein	Schleswig-Flensburg	10.77	53.87	20.5.2012	Lemke. M.	Lemke. M.	ethanol 96%	ZFMKTIS2349
ZFMK-TIS-2351	Araneae	Linyphiidae	Ceratinella scabrosa	female	adult	Germany	Mecklenburg-Vorpommern	Putbus. Rügen	13.44	54.34	25.5.2012	Muster. C.	Muster. C.	ethanol 96%	ZFMKTIS2351
ZFMK-TIS-2353	Araneae	Linyphiidae	Neriene peltata	male	adult	Germany	Mecklenburg-Vorpommern	Putbus. Rügen	13.44	54.34	25.5.2012	Muster. C.	Muster. C.	ethanol 96%	ZFMKTIS2353
ZFMK-TIS-2354	Araneae	Tetragnathidae	Tetragnatha extensa	male	adult	Germany	Mecklenburg-Vorpommern	Putbus. Rügen	13.45	54.34	25.5.2012	Muster. C.	Muster. C.	ethanol 96%	ZFMKTIS2354
ZFMK-TIS-2355	Araneae	Lycosidae	Pardosa prativaga	male	adult	Germany	Mecklenburg-Vorpommern	Putbus. Rügen	13.45	54.34	25.5.2012	Muster. C.	Muster. C.	ethanol 96%	ZFMKTIS2355
ZFMK-TIS-2356	Araneae	Dictynidae	Lathys humilis	male	adult	Germany	Mecklenburg-Vorpommern	Putbus. Rügen	13.45	54.34	25.5.2012	Muster. C.	Muster. C.	ethanol 96%	ZFMKTIS2356
ZFMK-TIS-2357	Araneae	Tetragnathidae	Tetragnatha montana	male	adult	Germany	Mecklenburg-Vorpommern	Putbus. Rügen	13.44	54.34	25.5.2012	Muster. C.	Muster. C.	ethanol 96%	ZFMKTIS2357
ZFMK-TIS-2358	Araneae	Theridiosomatidae	Theridiosoma gemmosum	male	adult	Germany	Mecklenburg-Vorpommern	Putbus. Rügen	13.44	54.34	25.5.2012	Muster. C.	Muster. C.	ethanol 96%	ZFMKTIS2358
ZFMK-TIS-2359	Araneae	Linyphiidae	Saaristoa abnormis	female	adult	Germany	Mecklenburg-Vorpommern	Putbus. Rügen	13.44	54.34	25.5.2012	Muster. C.	Muster. C.	ethanol 96%	ZFMKTIS2359
ZFMK-TIS-2360	Araneae	Linyphiidae	Hypomma cornutum	male	adult	Germany	Mecklenburg-Vorpommern	Putbus. Rügen	13.44	54.34	25.5.2012	Muster. C.	Muster. C.	ethanol 96%	ZFMKTIS2360
ZFMK-TIS-2361	Araneae	Lycosidae	Piratula hygrophila	male	adult	Germany	Mecklenburg-Vorpommern	Putbus. Rügen	13.44	54.34	25.5.2012	Muster. C.	Muster. C.	ethanol 96%	ZFMKTIS2361
ZFMK-TIS-2362	Araneae	Linyphiidae	Diplostyla concolor	male	adult	Germany	Mecklenburg-Vorpommern	Putbus. Rügen	13.44	54.34	25.5.2012	Muster. C.	Muster. C.	ethanol 96%	ZFMKTIS2362
ZFMK-TIS-2363	Araneae	Linyphiidae	Entelecara acuminata	male	adult	Germany	Mecklenburg-Vorpommern	Putbus. Rügen	13.44	54.34	25.5.2012	Muster. C.	Muster. C.	ethanol 96%	ZFMKTIS2363
ZFMK-TIS-2364	Araneae	Linyphiidae	Diplocephalus picinus	male	adult	Germany	Mecklenburg-Vorpommern	Putbus. Rügen	13.44	54.34	25.5.2012	Muster. C.	Muster. C.	ethanol 96%	ZFMKTIS2364
ZFMK-TIS-2365	Araneae	Linyphiidae	Neriene montana	male	adult	Germany	Mecklenburg-Vorpommern	Putbus. Rügen	13.44	54.34	25.5.2012	Muster. C.	Muster. C.	ethanol 96%	ZFMKTIS2365
ZFMK-TIS-2366	Araneae	Clubionidae	Clubiona lutescens	male	adult	Germany	Mecklenburg-Vorpommern	Putbus. Rügen	13.44	54.34	25.5.2012	Muster. C.	Muster. C.	ethanol 96%	ZFMKTIS2366
ZFMK-TIS-2367	Araneae	Araneidae	Nuctenea umbratica	female	adult	Germany	Mecklenburg-Vorpommern	Güstelitz. Putbus. Rügen	13.45	54.32	24.5.2012	Muster. C.	Muster. C.	ethanol 96%	ZFMKTIS2367
ZFMK-TIS-2368	Araneae	Clubionidae	Clubiona pallidula	male	adult	Germany	Mecklenburg-Vorpommern	Güstelitz. Putbus. Rügen	13.45	54.32	24.5.2012	Muster. C.	Muster. C.	ethanol 96%	ZFMKTIS2368
ZFMK-TIS-2369	Araneae	Linyphiidae	Kaestneria dorsalis	male	adult	Germany	Mecklenburg-Vorpommern	Güstelitz. Putbus. Rügen	13.45	54.32	24.5.2012	Muster. C.	Muster. C.	ethanol 96%	ZFMKTIS2369
ZFMK-TIS-2370	Araneae	Araneidae	Larinioides patagiatus	female	adult	Germany	Mecklenburg-Vorpommern	Güstelitz. Putbus. Rügen	13.45	54.32	24.5.2012	Muster. C.	Muster. C.	ethanol 96%	ZFMKTIS2370
ZFMK-TIS-2373	Araneae	Salticidae	Synageles venator	male	adult	Germany	Mecklenburg-Vorpommern	Güstelitz. Putbus. Rügen	13.45	54.32	14.5.2012	Muster. C.	Muster. C.	ethanol 96%	ZFMKTIS2373
ZFMK-TIS-2374	Araneae	Salticidae	Salticus scenicus	male	adult	Germany	Mecklenburg-Vorpommern	Güstelitz. Putbus. Rügen	13.45	54.32	14.5.2012	Muster. C.	Muster. C.	ethanol 96%	ZFMKTIS2374
ZFMK-TIS-2375	Araneae	Salticidae	Marpissa muscosa	male	adult	Germany	Mecklenburg-Vorpommern	Güstelitz. Putbus. Rügen	13.45	54.32	2.5.2012	Muster. C.	Muster. C.	ethanol 96%	ZFMKTIS2375
ZFMK-TIS-2376	Araneae	Agelenidae	Eratigena atrica	female	adult	Germany	Mecklenburg-Vorpommern	Güstelitz. Putbus. Rügen	13.45	54.32	2.5.2012	Muster. C.	Huber. B.A.	ethanol 96%	ZFMKTIS2376
ZFMK-TIS-2377	Araneae	Thomisidae	Ozyptila praticola	male	adult	Germany	Mecklenburg-Vorpommern	Güstelitz. Putbus. Rügen	13.45	54.32	21.5.2012	Muster. C.	Muster. C.	ethanol 96%	ZFMKTIS2377
ZFMK-TIS-2378	Araneae	Gnaphosidae	Drassyllus pusillus	male	adult	Germany	Mecklenburg-Vorpommern	Güstelitz. Putbus. Rügen	13.45	54.32	21.5.2012	Muster. C.	Muster. C.	ethanol 96%	ZFMKTIS2378
ZFMK-TIS-2379	Araneae	Linyphiidae	Bathyphantes approximatus	male	adult	Germany	Mecklenburg-Vorpommern	Güstelitz. Putbus. Rügen	13.45	54.32	21.5.2012	Muster. C.	Muster. C.	ethanol 96%	ZFMKTIS2379
ZFMK-TIS-2380	Araneae	Theridiidae	Enoplognatha thoracica	male	adult	Germany	Mecklenburg-Vorpommern	Güstelitz. Putbus. Rügen	13.45	54.32	3.6.2012	Muster. C.	Muster. C.	ethanol 96%	ZFMKTIS2380
ZFMK-TIS-2381	Araneae	Linyphiidae	Taranucnus setosus	male	adult	Germany	Mecklenburg-Vorpommern	Güstelitz. Putbus. Rügen	13.45	54.32	21.5.2012	Muster. C.	Muster. C.	ethanol 96%	ZFMKTIS2381
ZFMK-TIS-2382	Araneae	Theridiidae	Episinus angulatus	male	adult	Germany	Mecklenburg-Vorpommern	Güstelitz. Putbus. Rügen	13.45	54.32	21.5.2012	Muster. C.	Muster. C.	ethanol 96%	ZFMKTIS2382
ZFMK-TIS-2383	Araneae	Gnaphosidae	Drassyllus lutetianus	male	adult	Germany	Mecklenburg-Vorpommern	Güstelitz. Putbus. Rügen	13.45	54.32	21.5.2012	Muster. C.	Muster. C.	ethanol 96%	ZFMKTIS2383
ZFMK-TIS-2384	Araneae	Linyphiidae	Walckenaeria kochi	male	adult	Germany	Mecklenburg-Vorpommern	Güstelitz. Putbus. Rügen	13.45	54.32	14.5.2012	Muster. C.	Muster. C.	ethanol 96%	ZFMKTIS2384
ZFMK-TIS-2385	Araneae	Linyphiidae	Walckenaeria unicornis	male	adult	Germany	Mecklenburg-Vorpommern	Güstelitz. Putbus. Rügen	13.45	54.32	14.5.2012	Muster. C.	Muster. C.	ethanol 96%	ZFMKTIS2385
ZFMK-TIS-2386	Araneae	Linyphiidae	Walckenaeria acuminata	female	adult	Germany	Mecklenburg-Vorpommern	Güstelitz. Putbus. Rügen	13.45	54.32	14.5.2012	Muster. C.	Muster. C.	ethanol 96%	ZFMKTIS2386
ZFMK-TIS-2387	Araneae	Linyphiidae	Bathyphantes gracilis	male	adult	Germany	Mecklenburg-Vorpommern	Güstelitz. Putbus. Rügen	13.45	54.32	14.5.2012	Muster. C.	Muster. C.	ethanol 96%	ZFMKTIS2387
ZFMK-TIS-2388	Araneae	Linyphiidae	Oedothorax gibbosus	male	adult	Germany	Mecklenburg-Vorpommern	Güstelitz. Putbus. Rügen	13.45	54.32	14.5.2012	Muster. C.	Muster. C.	ethanol 96%	ZFMKTIS2388
ZFMK-TIS-2389	Araneae	Tetragnathidae	Pachygnatha clercki	male	adult	Germany	Mecklenburg-Vorpommern	Güstelitz. Putbus. Rügen	13.45	54.32	14.5.2012	Muster. C.	Muster. C.	ethanol 96%	ZFMKTIS2389
ZFMK-TIS-2390	Araneae	Lycosidae	Pirata piraticus	male	adult	Germany	Mecklenburg-Vorpommern	Güstelitz. Putbus. Rügen	13.45	54.32	14.5.2012	Muster. C.	Muster. C.	ethanol 96%	ZFMKTIS2390
ZFMK-TIS-2391	Araneae	Lycosidae	Trochosa ruricola	male	adult	Germany	Mecklenburg-Vorpommern	Güstelitz. Putbus. Rügen	13.45	54.32	7.5.2012	Muster. C.	Muster. C.	ethanol 96%	ZFMKTIS2391
ZFMK-TIS-2392	Araneae	Lycosidae	Trochosa spinipalpis	male	adult	Germany	Mecklenburg-Vorpommern	Güstelitz. Putbus. Rügen	13.45	54.32	7.5.2012	Muster. C.	Krammer. H.-J.	ethanol 96%	ZFMKTIS2392
ZFMK-TIS-2393	Araneae	Lycosidae	Alopecosa pulverulenta	male	adult	Germany	Mecklenburg-Vorpommern	Güstelitz. Putbus. Rügen	13.45	54.32	7.5.2012	Muster. C.	Blick. T.	ethanol 96%	ZFMKTIS2393
ZFMK-TIS-2394	Araneae	Lycosidae	Pirata piscatorius	male	adult	Germany	Mecklenburg-Vorpommern	Güstelitz. Putbus. Rügen	13.45	54.32	7.5.2012	Muster. C.	Muster. C.	ethanol 96%	ZFMKTIS2394
ZFMK-TIS-2395	Araneae	Thomisidae	Xysticus ulmi	male	adult	Germany	Mecklenburg-Vorpommern	Güstelitz. Putbus. Rügen	13.45	54.32	7.5.2012	Muster. C.	Muster. C.	ethanol 96%	ZFMKTIS2395
ZFMK-TIS-2396	Araneae	Linyphiidae	Stemonyphantes lineatus	male	adult	Germany	Mecklenburg-Vorpommern	Güstelitz. Putbus. Rügen	13.45	54.32	7.5.2012	Muster. C.	Muster. C.	ethanol 96%	ZFMKTIS2396
ZFMK-TIS-2397	Araneae	Linyphiidae	Oedothorax gibbosus	male	adult	Germany	Mecklenburg-Vorpommern	Güstelitz. Putbus. Rügen	13.45	54.32	7.5.2012	Muster. C.	Muster. C.	ethanol 96%	ZFMKTIS2397
ZFMK-TIS-2399	Araneae	Linyphiidae	Ceratinella brevis	male	adult	Germany	Mecklenburg-Vorpommern	Güstelitz. Putbus. Rügen	13.45	54.32	7.5.2012	Muster. C.	Muster. C.	ethanol 96%	ZFMKTIS2399
ZFMK-TIS-2400	Araneae	Linyphiidae	Diplocephalus latifrons	male	adult	Germany	Mecklenburg-Vorpommern	Güstelitz. Putbus. Rügen	13.45	54.32	7.5.2012	Muster. C.	Muster. C.	ethanol 96%	ZFMKTIS2400
ZFMK-TIS-2401	Araneae	Hahniidae	Antistea elegans	female	adult	Germany	Mecklenburg-Vorpommern	Güstelitz. Putbus. Rügen	13.45	54.32	7.5.2012	Muster. C.	Muster. C.	ethanol 96%	ZFMKTIS2401
ZFMK-TIS-2402	Araneae	Philodromidae	Philodromus dispar	male	adult	Germany	Mecklenburg-Vorpommern	Güstelitz. Putbus. Rügen	13.45	54.32	26.5.2012	Muster. C.	Muster. C.	ethanol 96%	ZFMKTIS2402
ZFMK-TIS-2403	Araneae	Tetragnathidae	Metellina merianae	male	adult	Germany	Mecklenburg-Vorpommern	Güstelitz. Putbus. Rügen	13.45	54.32	26.5.2012	Muster. C.	Muster. C.	ethanol 96%	ZFMKTIS2403
ZFMK-TIS-2404	Araneae	Clubionidae	Clubiona brevipes	male	adult	Germany	Mecklenburg-Vorpommern	Güstelitz. Putbus. Rügen	13.45	54.32	26.5.2012	Muster. C.	Muster. C.	ethanol 96%	ZFMKTIS2404
ZFMK-TIS-2405	Araneae	Theridiidae	Platnickina tincta	male	adult	Germany	Mecklenburg-Vorpommern	Güstelitz. Putbus. Rügen	13.45	54.32	26.5.2012	Muster. C.	Muster. C.	ethanol 96%	ZFMKTIS2405
ZFMK-TIS-2406	Araneae	Gnaphosidae	Scotophaeus quadripunctatus	male	adult	Germany	Mecklenburg-Vorpommern	Güstelitz. Putbus. Rügen	13.45	54.32	26.5.2012	Muster. C.	Muster. C.	ethanol 96%	ZFMKTIS2406
ZFMK-TIS-2407	Araneae	Nesticidae	Nesticus cellulanus	female	adult	Germany	Mecklenburg-Vorpommern	Güstelitz. Putbus. Rügen	13.45	54.32	26.5.2012	Muster. C.	Muster. C.	ethanol 96%	ZFMKTIS2407
ZFMK-TIS-2408	Araneae	Theridiidae	Theridion familiare	male	adult	Germany	Mecklenburg-Vorpommern	Güstelitz. Putbus. Rügen	13.45	54.32	26.5.2012	Muster. C.	Krammer. H.-J.	ethanol 96%	ZFMKTIS2408
ZFMK-TIS-2409	Araneae	Theridiidae	Parasteatoda lunata	female	adult	Germany	Mecklenburg-Vorpommern	Güstelitz. Putbus. Rügen	13.45	54.32	26.5.2012	Muster. C.	Muster. C.	ethanol 96%	ZFMKTIS2409
ZFMK-TIS-2410	Araneae	Agelenidae	Tegenaria domestica	male	adult	Germany	Mecklenburg-Vorpommern	Güstelitz. Putbus. Rügen	13.45	54.32	29.5.2012	Muster. C.	Muster. C.	ethanol 96%	ZFMKTIS2410
ZFMK-TIS-2411	Araneae	Linyphiidae	Ceratinella brevipes	male	adult	Germany	Mecklenburg-Vorpommern	Güstelitz. Putbus. Rügen	13.45	54.32	29.5.2012	Muster. C.	Muster. C.	ethanol 96%	ZFMKTIS2411
ZFMK-TIS-2412	Araneae	Thomisidae	Ozyptila trux	male	adult	Germany	Mecklenburg-Vorpommern	Güstelitz. Putbus. Rügen	13.45	54.32	29.5.2012	Muster. C.	Muster. C.	ethanol 96%	ZFMKTIS2412
ZFMK-TIS-2413	Araneae	Linyphiidae	Silometopus elegans	male	adult	Germany	Mecklenburg-Vorpommern	Güstelitz. Putbus. Rügen	13.45	54.32	29.5.2012	Muster. C.	Muster. C.	ethanol 96%	ZFMKTIS2413
ZFMK-TIS-2414	Araneae	Linyphiidae	Troxochrus scabriculus	male	adult	Germany	Mecklenburg-Vorpommern	Güstelitz. Putbus. Rügen	13.45	54.32	29.5.2012	Muster. C.	Muster. C.	ethanol 96%	ZFMKTIS2414
ZFMK-TIS-2415	Araneae	Lycosidae	Pardosa amentata	male	adult	Germany	Mecklenburg-Vorpommern	Gager. Rügen	13.69	54.31	6.5.2012	Muster. C.	Muster. C.	ethanol 96%	ZFMKTIS2415
ZFMK-TIS-2416	Araneae	Clubionidae	Clubiona phragmitis	female	adult	Germany	Mecklenburg-Vorpommern	Gager. Rügen	13.69	54.31	6.5.2012	Muster. C.	Muster. C.	ethanol 96%	ZFMKTIS2416
ZFMK-TIS-2417	Araneae	Clubionidae	Clubiona reclusa	male	adult	Germany	Mecklenburg-Vorpommern	Gager. Rügen	13.69	54.31	6.5.2012	Muster. C.	Muster. C.	ethanol 96%	ZFMKTIS2417
ZFMK-TIS-2418	Araneae	Phrurolithidae	Phrurolithus festivus	female	adult	Germany	Mecklenburg-Vorpommern	Gager. Rügen	13.69	54.31	6.5.2012	Muster. C.	Muster. C.	ethanol 96%	ZFMKTIS2418
ZFMK-TIS-2419	Araneae	Linyphiidae	Tiso vagans	female	adult	Germany	Mecklenburg-Vorpommern	Gager. Rügen	13.69	54.31	6.5.2012	Muster. C.	Muster. C.	ethanol 96%	ZFMKTIS2419
ZFMK-TIS-2420	Araneae	Lycosidae	Alopecosa cuneata	male	adult	Germany	Mecklenburg-Vorpommern	Gager. Rügen	13.69	54.31	6.5.2012	Muster. C.	Blick. T.	ethanol 96%	ZFMKTIS2420
ZFMK-TIS-2423	Araneae	Linyphiidae	Microlinyphia pusilla	male	adult	Germany	Mecklenburg-Vorpommern	Gager. Rügen	13.69	54.31	6.5.2012	Muster. C.	Muster. C.	ethanol 96%	ZFMKTIS2423
ZFMK-TIS-2424	Araneae	Tetragnathidae	Metellina mengei	male	adult	Germany	Mecklenburg-Vorpommern	Putbus. Rügen	13.46	54.32	2.5.2012	Muster. C.	Muster. C.	ethanol 96%	ZFMKTIS2424
ZFMK-TIS-2425	Araneae	Tetragnathidae	Pachygnatha listeri	male	adult	Germany	Mecklenburg-Vorpommern	Putbus. Rügen	13.46	54.32	2.5.2012	Muster. C.	Muster. C.	ethanol 96%	ZFMKTIS2425
ZFMK-TIS-2426	Araneae	Linyphiidae	Microneta viaria	male	adult	Germany	Mecklenburg-Vorpommern	Putbus. Rügen	13.46	54.32	2.5.2012	Muster. C.	Muster. C.	ethanol 96%	ZFMKTIS2426
ZFMK-TIS-2427	Araneae	Linyphiidae	Gongylidium rufipes	male	adult	Germany	Mecklenburg-Vorpommern	Putbus. Rügen	13.46	54.32	2.5.2012	Muster. C.	Muster. C.	ethanol 96%	ZFMKTIS2427
ZFMK-TIS-2428	Araneae	Linyphiidae	Linyphia hortensis	male	adult	Germany	Mecklenburg-Vorpommern	Putbus. Rügen	13.46	54.32	2.5.2012	Muster. C.	Muster. C.	ethanol 96%	ZFMKTIS2428
ZFMK-TIS-2429	Araneae	Theridiidae	Paidiscura pallens	male	adult	Germany	Mecklenburg-Vorpommern	Putbus. Rügen	13.46	54.32	2.5.2012	Muster. C.	Muster. C.	ethanol 96%	ZFMKTIS2429
ZFMK-TIS-2430	Araneae	Tetragnathidae	Pachygnatha degeeri	male	adult	Germany	Mecklenburg-Vorpommern	Putbus. Rügen	13.46	54.32	2.5.2012	Muster. C.	Muster. C.	ethanol 96%	ZFMKTIS2430
ZFMK-TIS-2432	Araneae	Linyphiidae	Araeoncus crassiceps	male	adult	Germany	Mecklenburg-Vorpommern	Putbus. Rügen	13.46	54.32	2.5.2012	Muster. C.	Muster. C.	ethanol 96%	ZFMKTIS2432
ZFMK-TIS-2436	Araneae	Lycosidae	Pardosa agrestis	male	adult	Germany	Mecklenburg-Vorpommern	Putbus. Rügen	13.46	54.32	2.5.2012	Muster. C.	Muster. C.	ethanol 96%	ZFMKTIS2436
ZFMK-TIS-2437	Araneae	Lycosidae	Arctosa cinerea	female	adult	Germany	Mecklenburg-Vorpommern	Göhren. Rügen	13.75	54.34	13.5.2012	Muster. C.	Muster. C.	ethanol 96%	ZFMKTIS2437
ZFMK-TIS-2438	Araneae	Philodromidae	Philodromus aureolus	male	adult	Germany	Mecklenburg-Vorpommern	Güstelitz. Putbus. Rügen	13.45	54.32	31.5.2012	Muster. C.	Muster. C.	ethanol 96%	ZFMKTIS2438
ZFMK-TIS-2441	Araneae	Pholcidae	Pholcus opilionoides	male	adult	Germany	Mecklenburg-Vorpommern	Putbus. Rügen	13.42	54.34	1.6.2012	Muster. C.	Muster. C.	ethanol 96%	ZFMKTIS2441
ZFMK-TIS-2442	Araneae	Agelenidae	Tegenaria ferruginea	male	adult	Germany	Mecklenburg-Vorpommern	Putbus. Rügen	13.42	54.34	1.6.2012	Muster. C.	Huber. B.A.	ethanol 96%	ZFMKTIS2442
ZFMK-TIS-2443	Araneae	Theridiidae	Theridion varians	male	adult	Germany	Mecklenburg-Vorpommern	Putbus. Rügen	13.42	54.34	1.6.2012	Muster. C.	Muster. C.	ethanol 96%	ZFMKTIS2443
ZFMK-TIS-2444	Araneae	Philodromidae	Philodromus cespitum	male	adult	Germany	Mecklenburg-Vorpommern	Putbus. Rügen	13.42	54.34	4.6.2012	Muster. C.	Muster. C.	ethanol 96%	ZFMKTIS2444
ZFMK-TIS-2445	Araneae	Araneidae	Larinioides sclopetarius	male	adult	Germany	Mecklenburg-Vorpommern	Putbus. Rügen	13.46	54.33	5.6.2012	Muster. C.	Muster. C.	ethanol 96%	ZFMKTIS2445
ZFMK-TIS-2449	Araneae	Lycosidae	Xerolycosa miniata	male	adult	Germany	Mecklenburg-Vorpommern	Putbus. Rügen	13.42	54.34	12.6.2012	Muster. C.	Muster. C.	ethanol 96%	ZFMKTIS2449
ZFMK-TIS-2450	Araneae	Philodromidae	Philodromus collinus	female	adult	Germany	Mecklenburg-Vorpommern	Putbus. Rügen	13.42	54.34	12.6.2012	Muster. C.	Muster. C.	ethanol 96%	ZFMKTIS2450
ZFMK-TIS-2451	Araneae	Theridiidae	Cryptachaea riparia	male	adult	Germany	Mecklenburg-Vorpommern	Putbus. Rügen	13.42	54.34	16.6.2012	Muster. C.	Muster. C.	ethanol 96%	ZFMKTIS2451
ZFMK-TIS-2452	Araneae	Pisauridae	Pisaura mirabilis	female	adult	Germany	Mecklenburg-Vorpommern	Putbus. Rügen	13.42	54.34	16.6.2012	Muster. C.	Muster. C.	ethanol 96%	ZFMKTIS2452
ZFMK-TIS-2453	Opiliones	Phalangiidae	Phalangium opilio	male	adult	Germany	Mecklenburg-Vorpommern	Putbus. Rügen	13.42	54.34	16.6.2012	Muster. C.	Muster. C.	ethanol 96%	ZFMKTIS2453
ZFMK-TIS-2455	Araneae	Miturgidae	Zora spinimana	male	adult	Germany	Mecklenburg-Vorpommern	Putbus. Rügen	13.42	54.34	26.6.2012	Muster. C.	Muster. C.	ethanol 96%	ZFMKTIS2455
ZFMK-TIS-2456	Opiliones	Phalangiidae	Lacinius ephippiatus	male	adult	Germany	Mecklenburg-Vorpommern	Putbus. Rügen	13.42	54.34	26.6.2012	Muster. C.	Muster. C.	ethanol 96%	ZFMKTIS2456
ZFMK-TIS-2457	Araneae	Agelenidae	Eratigena atrica	female	adult	Germany	Sachsen	Kaditz. Pieschen. Dresden	13.67	51.08	25.6.2012	Muster. C.	Huber. B.A.	ethanol 96%	ZFMKTIS2457
ZFMK-TIS-2458	Araneae	Pholcidae	Pholcus alticeps	male	adult	Germany	Sachsen	Kaditz. Pieschen. Dresden	13.67	51.08	25.6.2012	Muster. C.	Astrin. J.J.	ethanol 96%	ZFMKTIS2458
ZFMK-TIS-2459	Araneae	Theridiidae	Enoplognatha ovata	male	adult	Germany	Sachsen	Kaditz. Pieschen. Dresden	13.67	51.08	25.6.2012	Muster. C.	Blick. T.	ethanol 96%	ZFMKTIS2459
ZFMK-TIS-2460	Araneae	Linyphiidae	Diplostyla concolor	male	adult	Germany	Sachsen	Kaditz. Pieschen. Dresden	13.67	51.08	25.6.2012	Muster. C.	Muster. C.	ethanol 96%	ZFMKTIS2460
ZFMK-TIS-2462	Araneae	Linyphiidae	Lepthyphantes leprosus	female	adult	Germany	Sachsen	Kaditz. Pieschen. Dresden	13.67	51.08	25.6.2012	Muster. C.	Muster. C.	ethanol 96%	ZFMKTIS2462
ZFMK-TIS-2463	Araneae	Pholcidae	Pholcus opilionoides	male	adult	Germany	Sachsen	Pillnitz. Loschwitz. Dresden	13.88	51.01	23.6.2012	Muster. C.	Muster. C.	ethanol 96%	ZFMKTIS2463
ZFMK-TIS-2464	Araneae	Linyphiidae	Diplocephalus cristatus	male	adult	Germany	Sachsen	Pillnitz. Loschwitz. Dresden	13.88	51.01	23.6.2012	Muster. C.	Muster. C.	ethanol 96%	ZFMKTIS2464
ZFMK-TIS-2466	Araneae	Theridiidae	Parasteatoda tepidariorum	male	adult	Germany	Sachsen	Pillnitz. Loschwitz. Dresden	13.88	51.01	23.6.2012	Muster. C.	Muster. C.	ethanol 96%	ZFMKTIS2466
ZFMK-TIS-2467	Araneae	Philodromidae	Philodromus buxi	male	adult	Germany	Sachsen	Pillnitz. Loschwitz. Dresden	13.88	51.01	23.6.2012	Muster. C.	Krammer. H.-J.	ethanol 96%	ZFMKTIS2467
ZFMK-TIS-2468	Araneae	Agelenidae	Textrix denticulata	male	adult	Germany	Sachsen	Pillnitz. Loschwitz. Dresden	13.88	51.01	23.6.2012	Muster. C.	Muster. C.	ethanol 96%	ZFMKTIS2468
ZFMK-TIS-2470	Araneae	Pisauridae	Pisaura mirabilis	female	adult	Germany	Sachsen	Weinböhla	13.6	51.18	25.6.2012	Muster. C.	Muster. C.	ethanol 96%	ZFMKTIS2470
ZFMK-TIS-2471	Opiliones	Phalangiidae	Mitopus morio	female	adult	Germany	Sachsen	Weinböhla	13.6	51.18	25.6.2012	Muster. C.	Muster. C.	ethanol 96%	ZFMKTIS2471
ZFMK-TIS-2472	Opiliones	Phalangiidae	Rilaena triangularis	male	adult	Germany	Sachsen	Weinböhla	13.6	51.18	25.6.2012	Muster. C.	Muster. C.	ethanol 96%	ZFMKTIS2472
ZFMK-TIS-2473	Araneae	Agelenidae	Agelena labyrinthica	female	adult	Germany	Sachsen	Weinböhla	13.6	51.18	25.6.2012	Muster. C.	Muster. C.	ethanol 96%	ZFMKTIS2473
ZFMK-TIS-2474	Araneae	Tetragnathidae	Tetragnatha montana	male	adult	Germany	Sachsen	Weinböhla	13.6	51.18	25.6.2012	Muster. C.	Muster. C.	ethanol 96%	ZFMKTIS2474
ZFMK-TIS-2475	Araneae	Lycosidae	Pardosa amentata	male	adult	Germany	Sachsen	Weinböhla	13.6	51.18	25.6.2012	Muster. C.	Muster. C.	ethanol 96%	ZFMKTIS2475
ZFMK-TIS-2476	Araneae	Lycosidae	Piratula latitans	male	adult	Germany	Sachsen	Weinböhla	13.6	51.18	25.6.2012	Muster. C.	Muster. C.	ethanol 96%	ZFMKTIS2476
ZFMK-TIS-2477	Araneae	Lycosidae	Pardosa prativaga	female	adult	Germany	Sachsen	Weinböhla	13.6	51.18	25.6.2012	Muster. C.	Muster. C.	ethanol 96%	ZFMKTIS2477
ZFMK-TIS-2478	Araneae	Lycosidae	Piratula hygrophila	male	adult	Germany	Sachsen	Weinböhla	13.6	51.18	25.6.2012	Muster. C.	Muster. C.	ethanol 96%	ZFMKTIS2478
ZFMK-TIS-2479	Araneae	Lycosidae	Pardosa palustris	female	adult	Germany	Sachsen	Weinböhla	13.6	51.18	25.6.2012	Muster. C.	Muster. C.	ethanol 96%	ZFMKTIS2479
ZFMK-TIS-2480	Araneae	Lycosidae	Pardosa hortensis	female	adult	Germany	Sachsen	Weinböhla	13.6	51.18	25.6.2012	Muster. C.	Muster. C.	ethanol 96%	ZFMKTIS2480
ZFMK-TIS-2481	Araneae	Lycosidae	Pirata uliginosus	female	adult	Germany	Sachsen	Weinböhla	13.6	51.18	25.6.2012	Muster. C.	Muster. C.	ethanol 96%	ZFMKTIS2481
ZFMK-TIS-2482	Araneae	Miturgidae	Zora spinimana	female	adult	Germany	Sachsen	Weinböhla	13.6	51.18	25.6.2012	Muster. C.	Muster. C.	ethanol 96%	ZFMKTIS2482
ZFMK-TIS-2483	Araneae	Philodromidae	Philodromus collinus	male	adult	Germany	Sachsen	Weinböhla	13.6	51.18	25.6.2012	Muster. C.	Muster. C.	ethanol 96%	ZFMKTIS2483
ZFMK-TIS-2484	Araneae	Gnaphosidae	Trachyzelotes pedestris	female	adult	Germany	Sachsen	Weinböhla	13.6	51.18	25.6.2012	Muster. C.	Muster. C.	ethanol 96%	ZFMKTIS2484
ZFMK-TIS-2485	Araneae	Gnaphosidae	Drassyllus praeficus	female	adult	Germany	Sachsen	Weinböhla	13.6	51.18	25.6.2012	Muster. C.	Muster. C.	ethanol 96%	ZFMKTIS2485
ZFMK-TIS-2486	Araneae	Clubionidae	Clubiona reclusa	female	adult	Germany	Sachsen	Weinböhla	13.6	51.18	25.6.2012	Muster. C.	Muster. C.	ethanol 96%	ZFMKTIS2486
ZFMK-TIS-2487	Araneae	Theridiidae	Euryopis flavomaculata	female	adult	Germany	Sachsen	Weinböhla	13.6	51.18	25.6.2012	Muster. C.	Muster. C.	ethanol 96%	ZFMKTIS2487
ZFMK-TIS-2488	Araneae	Linyphiidae	Saaristoa abnormis	female	adult	Germany	Sachsen	Weinböhla	13.6	51.18	25.6.2012	Muster. C.	Muster. C.	ethanol 96%	ZFMKTIS2488
ZFMK-TIS-2489	Araneae	Tetragnathidae	Pachygnatha clercki	male	adult	Germany	Sachsen	Weinböhla	13.6	51.18	25.6.2012	Muster. C.	Muster. C.	ethanol 96%	ZFMKTIS2489
ZFMK-TIS-2492	Opiliones	Nemastomatidae	Nemastoma lugubre	female	adult	Germany	Sachsen	Weinböhla	13.6	51.18	25.6.2012	Muster. C.	Muster. C.	ethanol 96%	ZFMKTIS2492
ZFMK-TIS-2493	Araneae	Tetragnathidae	Metellina merianae	female	adult	Germany	Sachsen	Weinböhla	13.6	51.18	25.6.2012	Muster. C.	Muster. C.	ethanol 96%	ZFMKTIS2493
ZFMK-TIS-2494	Araneae	Linyphiidae	Oedothorax retusus	male	adult	Germany	Sachsen	Weinböhla	13.6	51.18	25.6.2012	Muster. C.	Muster. C.	ethanol 96%	ZFMKTIS2494
ZFMK-TIS-2495	Araneae	Linyphiidae	Oedothorax fuscus	male	adult	Germany	Sachsen	Weinböhla	13.6	51.18	25.6.2012	Muster. C.	Muster. C.	ethanol 96%	ZFMKTIS2495
ZFMK-TIS-2496	Araneae	Linyphiidae	Bathyphantes gracilis	male	adult	Germany	Sachsen	Weinböhla	13.6	51.18	25.6.2012	Muster. C.	Muster. C.	ethanol 96%	ZFMKTIS2496
ZFMK-TIS-2497	Araneae	Linyphiidae	Tenuiphantes flavipes	female	adult	Germany	Sachsen	Weinböhla	13.6	51.18	25.6.2012	Muster. C.	Muster. C.	ethanol 96%	ZFMKTIS2497
ZFMK-TIS-2498	Araneae	Hahniidae	Hahnia pusilla	female	adult	Germany	Sachsen	Weinböhla	13.6	51.18	25.6.2012	Muster. C.	Muster. C.	ethanol 96%	ZFMKTIS2498
ZFMK-TIS-2499	Araneae	Linyphiidae	Walckenaeria atrotibialis	female	adult	Germany	Sachsen	Weinböhla	13.6	51.18	25.6.2012	Muster. C.	Muster. C.	ethanol 96%	ZFMKTIS2499
ZFMK-TIS-2500	Araneae	Linyphiidae	Ceratinella brevis	female	adult	Germany	Sachsen	Weinböhla	13.6	51.18	25.6.2012	Muster. C.	Muster. C.	ethanol 96%	ZFMKTIS2500
ZFMK-TIS-2501	Araneae	Linyphiidae	Ceratinella brevipes	female	adult	Germany	Sachsen	Weinböhla	13.6	51.18	25.6.2012	Muster. C.	Muster. C.	ethanol 96%	ZFMKTIS2501
ZFMK-TIS-2501435	Araneae	Linyphiidae	Porrhomma convexum	male	adult	Germany	Baden-Württemberg	Baden-Württemberg. Schwäbische-Alp	9.45	48.26	22.2.2013	Köble. H.; Steiner. H.; Straub. R.; Zaenker. S.	Blick. T.	ethanol 96%	ZFMKTIS2501435
ZFMK-TIS-2501436	Araneae	Amaurobiidae	Amaurobius fenestralis	male		Germany	Baden-Württemberg	Baden-Württemberg. Schwäbische-Alp	9.45	48.26	22.2.2013	Köble. H.; Steiner. H.; Straub. R.; Zaenker. S.	Blick. T.	ethanol 96%	ZFMKTIS2501436
ZFMK-TIS-2501437	Araneae	Amaurobiidae	Amaurobius fenestralis	male		Germany	Baden-Württemberg	Baden-Württemberg. Schwäbische-Alp	9.45	48.26	22.2.2013	Köble. H.; Steiner. H.; Straub. R.; Zaenker. S.	Blick. T.	ethanol 96%	ZFMKTIS2501437
ZFMK-TIS-2501439	Araneae	Linyphiidae	Porrhomma convexum	female		Germany	Hessen	Hessen. Westlicher Hintertaunus	7.94	50.11	16.12.2012	Herborn. T.; Jamann. S.; Kaiser. U.; Kraus. D.	Blick. T.	ethanol 96%	ZFMKTIS2501439
ZFMK-TIS-2501440	Araneae	Linyphiidae	Porrhomma convexum	female		Germany	Hessen	Hessen. Westlicher Hintertaunus	7.94	50.11	16.12.2012	Herborn. T.; Jamann. S.; Kaiser. U.; Kraus. D.	Blick. T.	ethanol 96%	ZFMKTIS2501440
ZFMK-TIS-2501441	Araneae	Agelenidae	Tegenaria silvestris	female		Germany	Hessen	Hessen. Sandsteinspessart	9.6	50.24	9.2.2013	Auth. H.; Hillen. J.; Sauerbrei. R.; Walther. Y.; Zaenker. L.; Zaenker. S.	Blick. T.	ethanol 96%	ZFMKTIS2501441
ZFMK-TIS-2501442	Araneae	Agelenidae	Tegenaria silvestris	male		Germany	Hessen	Hessen. Fulda-Haune-Tafelland	9.65	50.85	2.2.2013	Brack. S.; Bramesfeld. W.; Bogon. K.; Dienstbier. L.; König. Ch.. M.; Singer-Bayrle. M.	Blick. T.	ethanol 96%	ZFMKTIS2501442
ZFMK-TIS-2501444	Araneae	Agelenidae	Histopona torpida	male		Germany	Hessen	Hessen. Fulda-Werra-Bergland	9.95	51	26.1.2013	Bachmann. S.; Busch. T.; Ehe. G.v.d.; Kaiser. U.; Winking. L.	Blick. T.	ethanol 96%	ZFMKTIS2501444
ZFMK-TIS-2501445	Araneae	Agelenidae	Histopona torpida	female		Germany	Hessen	Hessen. Fulda-Haune-Tafelland	9.58	50.84	2.2.2013	Brack. S.; Bramesfeld. W.; Bogon. K.; Dienstbier. L.; Henkel. H.; König. Ch.. M.	Blick. T.	ethanol 96%	ZFMKTIS2501445
ZFMK-TIS-2501449	Araneae	Amaurobiidae	Amaurobius fenestralis	female		Germany	Hessen	Hessen. Vorder- und Kuppenrhön	9.89	50.56	22.12.2012	Etzel. W.; Hillen. J.; Kern. K.; Matzke. H.; Müller. M.; Zaenker. S.	Blick. T.	ethanol 96%	ZFMKTIS2501449
ZFMK-TIS-2501450	Araneae	Linyphiidae	Lepthyphantes leprosus	female		Germany	Hessen	Hessen. Fulda-Haune-Tafelland	9.68	50.58	7.12.2012	Zaenker. S.	Blick. T.	ethanol 96%	ZFMKTIS2501450
ZFMK-TIS-2501600	Araneae	Agelenidae	Tegenaria silvestris			Germany	Baden-Württemberg	Baden-Württemberg. Schwäbische-Alp	9.89	48.67	16.2.2013	Köble. H.	Blick. T.	ethanol 96%	ZFMKTIS2501600
ZFMK-TIS-2501601	Araneae	Linyphiidae	Tenuiphantes alacris			Germany	Hessen	Hessen. Hohe Rhön	9.99	50.48	20.4.2013	Hohmann. I.; Jordan. P.; Kraus. D.; Kuhnt. S.; Zaenker. C.; Zaenker. S.	Blick. T.	ethanol 96%	ZFMKTIS2501601
ZFMK-TIS-2501602	Araneae	Linyphiidae	Tenuiphantes alacris			Germany	Hessen	Hessen. Östlicher Hintertaunus	8.28	50.39	13.4.2013	Friebe. R.; Freibe. U.; Imhof. H.; Schmidt. C.; Sauer. V.	Blick. T.	ethanol 96%	ZFMKTIS2501602
ZFMK-TIS-2501604	Araneae	Agelenidae	Histopona torpida			Germany	Rheinland-Pfalz	Rheinland-Pfalz. Westlicher Hintertaunus	7.78	50.1	12.5.2013	Jamann. S.; Kraus. D.	Blick. T.	ethanol 96%	ZFMKTIS2501604
ZFMK-TIS-2501605	Araneae	Amaurobiidae	Amaurobius ferox			Germany	Rheinland-Pfalz	Rheinland-Pfalz. Westlicher Hintertaunus	7.78	50.1	12.5.2013	Jamann. S.; Kraus. D.	Blick. T.	ethanol 96%	ZFMKTIS2501605
ZFMK-TIS-2501606	Araneae	Linyphiidae	Porrhomma convexum	male	adult	Germany	Rheinland-Pfalz	Rheinland-Pfalz. Oberes Mittelrheintal	7.79	50.24	28.4.2013	Herborn. T.; Jamann. S.; Kraus. D.; Wendel. M.	Blick. T.	ethanol 96%	ZFMKTIS2501606
ZFMK-TIS-2501607	Araneae	Linyphiidae	Porrhomma convexum	female	adult	Germany	Rheinland-Pfalz	Rheinland-Pfalz. Oberes Mittelrheintal	7.79	50.24	28.4.2013	Herborn. T.; Jamann. S.; Kraus. D.; Wendel. M.	Blick. T.	ethanol 96%	ZFMKTIS2501607
ZFMK-TIS-2501609	Araneae	Linyphiidae	Palliduphantes pallidus	male	adult	Germany	Hessen	Hessen. Vorder- und Kuppenrhön	9.93	50.53	1.8.2013	Jordan. P.; Zaenker. S.	Blick. T.	ethanol 96%	ZFMKTIS2501609
ZFMK-TIS-2501614	Araneae	Linyphiidae	Porrhomma convexum	female	adult	Germany	Baden-Württemberg	Baden-Württemberg. Schwäbische-Alp	9.45	48.26	22.2.2013	Köble. H.; Steiner. H.; Straub. R.; Zaenker. S.	Blick. T.	ethanol 96%	ZFMKTIS2501614
ZFMK-TIS-2501807	Opiliones	Nemastomatidae	Paranemastoma quadripunctatum			Germany	Rheinland-Pfalz	Dellfeld	7.44	49.22	1.5.2013	Weber. D.	Weber. D.	ethanol 96%	ZFMKTIS2501807
ZFMK-TIS-2501988	Araneae	Nesticidae	Nesticus cellulanus			Luxembourg		Mersch	6.1	49.72	9.5.2013	Weber. D.	Weber. D.	ethanol 96%	ZFMKTIS2501988
ZFMK-TIS-2501991	Araneae	Nesticidae	Nesticus cellulanus			Luxembourg		Mersch	6.1	49.72	9.5.2013	Weber. D.	Weber. D.	ethanol 96%	ZFMKTIS2501991
ZFMK-TIS-2502009	Araneae	Nesticidae	Nesticus cellulanus			Luxembourg		Mersch	6.1	49.72	9.5.2013	Weber. D.	Weber. D.	ethanol 96%	ZFMKTIS2502009
ZFMK-TIS-2502010	Araneae	Tetragnathidae	Metellina merianae			Luxembourg		Mersch	6.1	49.72	9.5.2013	Weber. D.	Weber. D.	ethanol 96%	ZFMKTIS2502010
ZFMK-TIS-2502149	Araneae	Tetragnathidae	Metellina merianae	female	adult	Germany	Rheinland-Pfalz	Nothweiler	7.81	49.06	8.6.2013	Weber. D.	Weber. D.	ethanol 96%	ZFMKTIS2502149
ZFMK-TIS-2502510	Araneae	Nesticidae	Nesticus cellulanus			Germany	Saarland	Dudweiler	7.04	49.25	4.3.2013	Weber. D.	Weber. D.	ethanol 96%	ZFMKTIS2502510
ZFMK-TIS-2502512	Araneae	Nesticidae	Nesticus cellulanus			Germany	Saarland	Bliesdahlheim	7.25	49.18	3.2.2013	Weber. D.	Weber. D.	ethanol 96%	ZFMKTIS2502512
ZFMK-TIS-2502513	Araneae	Nesticidae	Nesticus cellulanus			Germany	Saarland	Kirkel	7.31	49.29	9.12.2012	Weber. D.	Weber. D.	ethanol 96%	ZFMKTIS2502513
ZFMK-TIS-2502514	Araneae	Nesticidae	Nesticus cellulanus			Germany	Saarland	Borg	6.44	49.51	8.3.2013	Weber. D.	Weber. D.	ethanol 96%	ZFMKTIS2502514
ZFMK-TIS-2502515	Araneae	Nesticidae	Nesticus cellulanus			Germany	Saarland	Oberlimberg	6.69	49.34	6.1.2013	Weber. D.	Weber. D.	ethanol 96%	ZFMKTIS2502515
ZFMK-TIS-2502516	Araneae	Nesticidae	Nesticus cellulanus			Germany	Rheinland-Pfalz	Annweiler-Queichhambach	8	49.22	10.2.2003	Weber. D.	Weber. D.	ethanol 96%	ZFMKTIS2502516
ZFMK-TIS-2502517	Araneae	Nesticidae	Nesticus cellulanus			Germany	Rheinland-Pfalz	Neustadt a.d. Weinstrasse	8.12	49.36	29.3.2013	Weber. D.	Weber. D.	ethanol 96%	ZFMKTIS2502517
ZFMK-TIS-2502518	Araneae	Nesticidae	Nesticus cellulanus			Germany	Saarland	Rehlingen	6.67	49.38	6.1.2013	Weber. D.	Weber. D.	ethanol 96%	ZFMKTIS2502518
ZFMK-TIS-2502519	Araneae	Nesticidae	Nesticus cellulanus			Germany	Saarland	Saarbrücken (ST Ensheim)	7.11	49.24	2.2.2013	Weber. D.	Weber. D.	ethanol 96%	ZFMKTIS2502519
ZFMK-TIS-2502520	Araneae	Nesticidae	Nesticus cellulanus			Germany	Saarland	Borg	6.44	49.51	8.3.2013	Weber. D.	Weber. D.	ethanol 96%	ZFMKTIS2502520
ZFMK-TIS-2502521	Araneae	Nesticidae	Nesticus cellulanus			Germany	Saarland	Saarbrücken	6.96	49.24	4.3.2013	Weber. D.	Weber. D.	ethanol 96%	ZFMKTIS2502521
ZFMK-TIS-2502522	Araneae	Nesticidae	Nesticus cellulanus			Germany	Saarland	Stollen beim Dasselter Stein	6.74	49.4	10.3.2013	Weber. D.	Weber. D.	ethanol 96%	ZFMKTIS2502522
ZFMK-TIS-2502524	Araneae	Nesticidae	Nesticus cellulanus			Germany	Saarland	Stollen beim Dasselter Stein	6.74	49.4	10.3.2013	Weber. D.	Weber. D.	ethanol 96%	ZFMKTIS2502524
ZFMK-TIS-2502526	Araneae	Nesticidae	Nesticus cellulanus			Luxembourg		Luxemburg	6.13	49.61	2.3.2013	Weber. D.	Weber. D.	ethanol 96%	ZFMKTIS2502526
ZFMK-TIS-2502527	Araneae	Nesticidae	Nesticus cellulanus			Luxembourg		Luxemburg	6.13	49.61	3.12.2012	Weber. D.	Weber. D.	ethanol 96%	ZFMKTIS2502527
ZFMK-TIS-2502537	Araneae	Tetragnathidae	Meta menardi			Germany	Saarland	Borg	6.44	49.51	8.3.2013	Weber. D.	Weber. D.	ethanol 96%	ZFMKTIS2502537
ZFMK-TIS-2502538	Opiliones	Phalangiidae	Amilenus aurantiacus			Germany	Rheinland-Pfalz	Ramberg	8.01	49.26	8.4.2013	Weber. D.	Weber. D.	ethanol 96%	ZFMKTIS2502538
ZFMK-TIS-2502539	Opiliones	Phalangiidae	Amilenus aurantiacus			Germany	Rheinland-Pfalz	Ramberg	8.01	49.26	8.4.2013	Weber. D.	Weber. D.	ethanol 96%	ZFMKTIS2502539
ZFMK-TIS-2502540	Opiliones	Phalangiidae	Amilenus aurantiacus			Germany	Saarland	Saarbrücken	7.07	49.25	2.2.2013	Weber. D.	Weber. D.	ethanol 96%	ZFMKTIS2502540
ZFMK-TIS-2502541	Opiliones	Phalangiidae	Amilenus aurantiacus			Germany	Rheinland-Pfalz	Nothweiler	7.81	49.06	10.2.2003	Weber. D.	Weber. D.	ethanol 96%	ZFMKTIS2502541
ZFMK-TIS-2502542	Opiliones	Phalangiidae	Amilenus aurantiacus			Germany	Saarland	Kirkel	7.31	49.29	9.12.2012	Weber. D.	Weber. D.	ethanol 96%	ZFMKTIS2502542
ZFMK-TIS-2502543	Opiliones	Phalangiidae	Amilenus aurantiacus			Germany	Rheinland-Pfalz	Nothweiler	7.81	49.06	10.2.2003	Weber. D.	Weber. D.	ethanol 96%	ZFMKTIS2502543
ZFMK-TIS-2502544	Opiliones	Phalangiidae	Amilenus aurantiacus			Germany	Rheinland-Pfalz	Pirmasens-Niedersimten	7.59	49.16	25.12.2012	Weber. D.	Weber. D.	ethanol 96%	ZFMKTIS2502544
ZFMK-TIS-2502545	Opiliones	Phalangiidae	Amilenus aurantiacus			Germany	Rheinland-Pfalz	Nothweiler	7.81	49.06	10.2.2003	Weber. D.	Weber. D.	ethanol 96%	ZFMKTIS2502545
ZFMK-TIS-2502546	Opiliones	Phalangiidae	Amilenus aurantiacus			Germany	Rheinland-Pfalz	Ramberg	8.01	49.26	8.4.2013	Weber. D.	Weber. D.	ethanol 96%	ZFMKTIS2502546
ZFMK-TIS-2502547	Opiliones	Phalangiidae	Amilenus aurantiacus			Germany	Saarland	Saarbrücken. Ensheim	7.11	49.24	2.2.2013	Weber. D.	Weber. D.	ethanol 96%	ZFMKTIS2502547
ZFMK-TIS-2502551	Araneae	Tetragnathidae	Metellina merianae			Germany	Saarland	Nunkirchen	6.83	49.48	4.12.2012	Weber. D.	Weber. D.	ethanol 96%	ZFMKTIS2502551
ZFMK-TIS-2502552	Araneae	Tetragnathidae	Metellina merianae			Germany	Saarland	Dudweiler	7.04	49.25	4.3.2013	Weber. D.	Weber. D.	ethanol 96%	ZFMKTIS2502552
ZFMK-TIS-2502554	Araneae	Tetragnathidae	Metellina merianae			Germany	Saarland	Dudweiler	7.04	49.25	4.3.2013	Weber. D.	Weber. D.	ethanol 96%	ZFMKTIS2502554
ZFMK-TIS-2502557	Araneae	Tetragnathidae	Metellina merianae			Luxembourg		Goesdorf	5.96	49.92	2.12.2012	Weber. D.	Weber. D.	ethanol 96%	ZFMKTIS2502557
ZFMK-TIS-2502567	Opiliones	Nemastomatidae	Paranemastoma quadripunctatum			Germany	Rheinland-Pfalz	Obersimten	7.57	49.14	25.12.2012	Weber. D.	Weber. D.	ethanol 96%	ZFMKTIS2502567
ZFMK-TIS-2502568	Opiliones	Nemastomatidae	Paranemastoma quadripunctatum			Germany	Saarland	Kirkel	7.21	49.29	26.11.2012	Weber. D.	Weber. D.	ethanol 96%	ZFMKTIS2502568
ZFMK-TIS-2502569	Opiliones	Nemastomatidae	Paranemastoma quadripunctatum			Germany	Saarland	Kirkel	7.21	49.29	26.11.2012	Weber. D.	Weber. D.	ethanol 96%	ZFMKTIS2502569
ZFMK-TIS-2502570	Opiliones	Nemastomatidae	Paranemastoma quadripunctatum			Germany	Saarland	Kirkel	7.21	49.29	26.11.2012	Weber. D.	Weber. D.	ethanol 96%	ZFMKTIS2502570
ZFMK-TIS-2502571	Opiliones	Nemastomatidae	Paranemastoma quadripunctatum			Germany	Saarland	Kirkel	7.21	49.29	26.11.2012	Weber. D.	Weber. D.	ethanol 96%	ZFMKTIS2502571
ZFMK-TIS-2502573	Opiliones	Nemastomatidae	Paranemastoma quadripunctatum			Germany	Saarland	Dudweiler	7.04	49.25	4.3.2013	Weber. D.	Weber. D.	ethanol 96%	ZFMKTIS2502573
ZFMK-TIS-2502574	Opiliones	Nemastomatidae	Paranemastoma quadripunctatum			Germany	Saarland	Dudweiler	7.04	49.25	4.3.2013	Weber. D.	Weber. D.	ethanol 96%	ZFMKTIS2502574
ZFMK-TIS-2503	Araneae	Linyphiidae	Abacoproeces saltuum	female	adult	Germany	Sachsen	Weinböhla	13.6	51.18	25.6.2012	Muster. C.	Muster. C.	ethanol 96%	ZFMKTIS2503
ZFMK-TIS-2504845	Araneae	Theridiidae	Neottiura bimaculata	male	adult	Germany	Hessen	Edersee	8.93	51.18	15.6.2013	Muster. C.	Muster. C.	ethanol 96%	ZFMKTIS2504845
ZFMK-TIS-2504846	Araneae	Dictynidae	Dictyna uncinata	female	adult	Germany	Hessen	Edersee	8.93	51.18	15.6.2013	Muster. C.	Muster. C.	ethanol 96%	ZFMKTIS2504846
ZFMK-TIS-2504849	Araneae	Theridiidae	Phylloneta sisyphia	female	adult	Germany	Hessen	Edersee	8.93	51.18	15.6.2013	Muster. C.	Muster. C.	ethanol 96%	ZFMKTIS2504849
ZFMK-TIS-2504850	Araneae	Tetragnathidae	Metellina mengei	female	adult	Germany	Hessen	Edersee	8.93	51.18	15.6.2013	Muster. C.	Muster. C.	ethanol 96%	ZFMKTIS2504850
ZFMK-TIS-2504851	Opiliones	Phalangiidae	Rilaena triangularis	male	adult	Germany	Hessen	Edersee	8.96	51.17	15.6.2013	Muster. C.	Muster. C.	ethanol 96%	ZFMKTIS2504851
ZFMK-TIS-2504852	Araneae	Linyphiidae	Tenuiphantes flavipes	female	adult	Germany	Hessen	Edersee	8.96	51.17	15.6.2013	Muster. C.	Muster. C.	ethanol 96%	ZFMKTIS2504852
ZFMK-TIS-2504853	Araneae	Linyphiidae	Maso sundevalli	male	adult	Germany	Hessen	Edersee	8.96	51.17	15.6.2013	Muster. C.	Muster. C.	ethanol 96%	ZFMKTIS2504853
ZFMK-TIS-2504854	Araneae	Linyphiidae	Maso sundevalli	female	adult	Germany	Hessen	Edersee	8.96	51.17	15.6.2013	Muster. C.	Muster. C.	ethanol 96%	ZFMKTIS2504854
ZFMK-TIS-2504855	Araneae	Linyphiidae	Nusoncus nasutus	female	adult	Germany	Hessen	Edersee	8.96	51.17	15.6.2013	Muster. C.	Muster. C.	ethanol 96%	ZFMKTIS2504855
ZFMK-TIS-2504856	Araneae	Linyphiidae	Trematocephalus cristatus	male	adult	Germany	Hessen	Edersee	8.96	51.17	15.6.2013	Muster. C.	Muster. C.	ethanol 96%	ZFMKTIS2504856
ZFMK-TIS-2504858	Araneae	Linyphiidae	Hypomma cornutum	female	adult	Germany	Hessen	Edersee	8.96	51.17	15.6.2013	Muster. C.	Muster. C.	ethanol 96%	ZFMKTIS2504858
ZFMK-TIS-2504859	Araneae	Lycosidae	Pardosa amentata	male	adult	Germany	Hessen	Edersee	8.96	51.17	15.6.2013	Muster. C.	Muster. C.	ethanol 96%	ZFMKTIS2504859
ZFMK-TIS-2504860	Araneae	Lycosidae	Pardosa amentata	female	adult	Germany	Hessen	Edersee	8.96	51.17	15.6.2013	Muster. C.	Muster. C.	ethanol 96%	ZFMKTIS2504860
ZFMK-TIS-2504861	Araneae	Salticidae	Euophrys frontalis	female	adult	Germany	Hessen	Edersee	8.96	51.17	15.6.2013	Muster. C.	Muster. C.	ethanol 96%	ZFMKTIS2504861
ZFMK-TIS-2504862	Araneae	Tetragnathidae	Tetragnatha nigrita	male	adult	Germany	Mecklenburg-Vorpommern	Rügen	13.42	54.34	29.7.2013	Muster. C.	Muster. C.	ethanol 96%	ZFMKTIS2504862
ZFMK-TIS-2504863	Araneae	Lycosidae	Arctosa cinerea	female	adult	Germany	Mecklenburg-Vorpommern	Rügen	13.46	54.33	1.10.2013	Muster. C.	Muster. C.	ethanol 96%	ZFMKTIS2504863
ZFMK-TIS-2504865	Araneae	Linyphiidae	Walckenaeria atrotibialis	female	adult	Germany	Bayern	Alpen: Karwendel	11.27	47.44	20.10.2013	Muster. C.	Muster. C.	ethanol 96%	ZFMKTIS2504865
ZFMK-TIS-2504866	Araneae	Linyphiidae	Walckenaeria atrotibialis	female	adult	Germany	Bayern	Alpen: Karwendel	11.27	47.44	20.10.2013	Muster. C.	Muster. C.	ethanol 96%	ZFMKTIS2504866
ZFMK-TIS-2504867	Araneae	Linyphiidae	Microneta viaria	male	adult	Germany	Bayern	Alpen: Karwendel	11.27	47.44	20.10.2013	Muster. C.	Muster. C.	ethanol 96%	ZFMKTIS2504867
ZFMK-TIS-2504868	Araneae	Linyphiidae	Microneta viaria	female	adult	Germany	Bayern	Alpen: Karwendel	11.27	47.44	20.10.2013	Muster. C.	Muster. C.	ethanol 96%	ZFMKTIS2504868
ZFMK-TIS-2504869	Araneae	Linyphiidae	Tenuiphantes cristatus	male	adult	Germany	Bayern	Alpen: Karwendel	11.27	47.44	20.10.2013	Muster. C.	Muster. C.	ethanol 96%	ZFMKTIS2504869
ZFMK-TIS-2504870	Araneae	Linyphiidae	Tenuiphantes cristatus	female	adult	Germany	Bayern	Alpen: Karwendel	11.27	47.44	20.10.2013	Muster. C.	Muster. C.	ethanol 96%	ZFMKTIS2504870
ZFMK-TIS-2504871	Araneae	Linyphiidae	Tenuiphantes alacris	female	adult	Germany	Bayern	Alpen: Karwendel	11.27	47.44	20.10.2013	Muster. C.	Muster. C.	ethanol 96%	ZFMKTIS2504871
ZFMK-TIS-2504873	Araneae	Hahniidae	Hahnia pusilla	female	adult	Germany	Bayern	Alpen: Karwendel	11.27	47.44	20.10.2013	Muster. C.	Muster. C.	ethanol 96%	ZFMKTIS2504873
ZFMK-TIS-2504874	Araneae	Linyphiidae	Lepthyphantes nodifer	male	adult	Germany	Bayern	Alpen: Karwendel	11.27	47.44	20.10.2013	Muster. C.	Muster. C.	ethanol 96%	ZFMKTIS2504874
ZFMK-TIS-2504875	Araneae	Linyphiidae	Lepthyphantes nodifer	female	adult	Germany	Bayern	Alpen: Karwendel	11.27	47.44	20.10.2013	Muster. C.	Muster. C.	ethanol 96%	ZFMKTIS2504875
ZFMK-TIS-2504876	Araneae	Linyphiidae	Walckenaeria cucullata	female	adult	Germany	Bayern	Alpen: Karwendel	11.27	47.44	20.10.2013	Muster. C.	Muster. C.	ethanol 96%	ZFMKTIS2504876
ZFMK-TIS-2504877	Araneae	Linyphiidae	Gongylidiellum latebricola	female	adult	Germany	Bayern	Alpen: Karwendel	11.27	47.44	20.10.2013	Muster. C.	Muster. C.	ethanol 96%	ZFMKTIS2504877
ZFMK-TIS-2504878	Araneae	Linyphiidae	Gongylidiellum latebricola	female	adult	Germany	Bayern	Alpen: Karwendel	11.27	47.44	20.10.2013	Muster. C.	Muster. C.	ethanol 96%	ZFMKTIS2504878
ZFMK-TIS-2504879	Araneae	Linyphiidae	Centromerus incilium	female	adult	Germany	Bayern	Alpen: Karwendel	11.27	47.44	20.10.2013	Muster. C.	Muster. C.	ethanol 96%	ZFMKTIS2504879
ZFMK-TIS-2504881	Araneae	Miturgidae	Zora spinimana	female	adult	Germany	Bayern	Alpen: Karwendel	11.27	47.44	20.10.2013	Muster. C.	Muster. C.	ethanol 96%	ZFMKTIS2504881
ZFMK-TIS-2504882	Araneae	Agelenidae	Histopona torpida	female	adult	Germany	Bayern	Alpen: Karwendel	11.27	47.44	20.10.2013	Muster. C.	Muster. C.	ethanol 96%	ZFMKTIS2504882
ZFMK-TIS-2504883	Opiliones	Phalangiidae	Amilenus aurantiacus		juvenile	Germany	Bayern	Alpen: Karwendel	11.27	47.44	20.10.2013	Muster. C.	Muster. C.	ethanol 96%	ZFMKTIS2504883
ZFMK-TIS-2504884	Araneae	Agelenidae	Coelotes terrestris	male	adult	Germany	Bayern	Alpen: Karwendel	11.27	47.44	20.10.2013	Muster. C.	Muster. C.	ethanol 96%	ZFMKTIS2504884
ZFMK-TIS-2504885	Araneae	Agelenidae	Inermocoelotes inermis	male	adult	Germany	Bayern	Alpen: Karwendel	11.27	47.44	20.10.2013	Muster. C.	Krammer. H.-J.	ethanol 96%	ZFMKTIS2504885
ZFMK-TIS-2504887	Araneae	Salticidae	Neon reticulatus	female	adult	Germany	Bayern	Alpen: Karwendel	11.27	47.44	20.10.2013	Muster. C.	Muster. C.	ethanol 96%	ZFMKTIS2504887
ZFMK-TIS-2504892	Araneae	Tetragnathidae	Metellina mengei	male	adult	Germany	Bayern	Alpen: Karwendel	11.27	47.44	20.10.2013	Muster. C.	Muster. C.	ethanol 96%	ZFMKTIS2504892
ZFMK-TIS-2504893	Opiliones	Phalangiidae	Mitopus morio	female	adult	Germany	Bayern	Alpen: Karwendel	11.27	47.42	20.10.2013	Muster. C.	Muster. C.	ethanol 96%	ZFMKTIS2504893
ZFMK-TIS-2504894	Opiliones	Phalangiidae	Lophopilio palpinalis	female	adult	Germany	Bayern	Alpen: Karwendel	11.27	47.42	20.10.2013	Muster. C.	Muster. C.	ethanol 96%	ZFMKTIS2504894
ZFMK-TIS-2504895	Araneae	Linyphiidae	Tenuiphantes alacris	female	adult	Germany	Bayern	Alpen: Karwendel	11.27	47.42	20.10.2013	Muster. C.	Muster. C.	ethanol 96%	ZFMKTIS2504895
ZFMK-TIS-2504897	Araneae	Dysderidae	Harpactea lepida	male	adult	Germany	Bayern	Alpen: Karwendel	11.27	47.42	20.10.2013	Muster. C.	Muster. C.	ethanol 96%	ZFMKTIS2504897
ZFMK-TIS-2504898	Araneae	Linyphiidae	Diplocephalus latifrons	female	adult	Germany	Bayern	Alpen: Karwendel	11.27	47.42	20.10.2013	Muster. C.	Muster. C.	ethanol 96%	ZFMKTIS2504898
ZFMK-TIS-2504899	Araneae	Linyphiidae	Diplocephalus latifrons	female	adult	Germany	Bayern	Alpen: Karwendel	11.27	47.42	20.10.2013	Muster. C.	Muster. C.	ethanol 96%	ZFMKTIS2504899
ZFMK-TIS-2504900	Araneae	Linyphiidae	Minyriolus pusillus	male	adult	Germany	Bayern	Alpen: Karwendel	11.27	47.42	20.10.2013	Muster. C.	Muster. C.	ethanol 96%	ZFMKTIS2504900
ZFMK-TIS-2504901	Araneae	Linyphiidae	Minyriolus pusillus	male	adult	Germany	Bayern	Alpen: Karwendel	11.27	47.42	20.10.2013	Muster. C.	Muster. C.	ethanol 96%	ZFMKTIS2504901
ZFMK-TIS-2504902	Araneae	Linyphiidae	Micrargus herbigradus	female	adult	Germany	Bayern	Alpen: Karwendel	11.27	47.42	20.10.2013	Muster. C.	Muster. C.	ethanol 96%	ZFMKTIS2504902
ZFMK-TIS-2504903	Araneae	Linyphiidae	Micrargus herbigradus	female	adult	Germany	Bayern	Alpen: Karwendel	11.27	47.42	20.10.2013	Muster. C.	Krammer. H.-J.	ethanol 96%	ZFMKTIS2504903
ZFMK-TIS-2504904	Araneae	Linyphiidae	Ceratinella brevis	male	adult	Germany	Bayern	Alpen: Karwendel	11.27	47.42	20.10.2013	Muster. C.	Muster. C.	ethanol 96%	ZFMKTIS2504904
ZFMK-TIS-2504905	Araneae	Linyphiidae	Centromerus pabulator	female	adult	Germany	Bayern	Alpen: Karwendel	11.27	47.42	20.10.2013	Muster. C.	Krammer. H.-J.	ethanol 96%	ZFMKTIS2504905
ZFMK-TIS-2504906	Araneae	Linyphiidae	Tapinocyba pallens	female	adult	Germany	Bayern	Alpen: Karwendel	11.27	47.42	20.10.2013	Muster. C.	Huber. B.A.	ethanol 96%	ZFMKTIS2504906
ZFMK-TIS-2504907	Araneae	Linyphiidae	Tapinocyba pallens	male	adult	Germany	Bayern	Alpen: Karwendel	11.27	47.42	20.10.2013	Muster. C.	Muster. C.	ethanol 96%	ZFMKTIS2504907
ZFMK-TIS-2504908	Araneae	Linyphiidae	Gonatium paradoxum	male	adult	Germany	Bayern	Alpen: Karwendel	11.27	47.42	20.10.2013	Muster. C.	Muster. C.	ethanol 96%	ZFMKTIS2504908
ZFMK-TIS-2504909	Araneae	Linyphiidae	Centromerus silvicola	male	adult	Germany	Bayern	Alpen: Karwendel	11.27	47.42	20.10.2013	Muster. C.	Muster. C.	ethanol 96%	ZFMKTIS2504909
ZFMK-TIS-2504910	Araneae	Linyphiidae	Tapinocyba affinis	female	adult	Germany	Bayern	Alpen: Karwendel	11.29	47.41	20.10.2013	Muster. C.	Muster. C.	ethanol 96%	ZFMKTIS2504910
ZFMK-TIS-2504911	Araneae	Linyphiidae	Tapinocyba affinis	female	adult	Germany	Bayern	Alpen: Karwendel	11.29	47.41	20.10.2013	Muster. C.	Muster. C.	ethanol 96%	ZFMKTIS2504911
ZFMK-TIS-2504912	Araneae	Linyphiidae	Centromerus arcanus	female	adult	Germany	Bayern	Alpen: Karwendel	11.29	47.41	20.10.2013	Muster. C.	Muster. C.	ethanol 96%	ZFMKTIS2504912
ZFMK-TIS-2504913	Araneae	Linyphiidae	Centromerus arcanus	male	adult	Germany	Bayern	Alpen: Karwendel	11.29	47.41	20.10.2013	Muster. C.	Muster. C.	ethanol 96%	ZFMKTIS2504913
ZFMK-TIS-2504914	Araneae	Hahniidae	Hahnia difficilis	female	adult	Germany	Bayern	Alpen: Karwendel	11.29	47.41	20.10.2013	Muster. C.	Muster. C.	ethanol 96%	ZFMKTIS2504914
ZFMK-TIS-2504915	Araneae	Hahniidae	Hahnia difficilis	female	adult	Germany	Bayern	Alpen: Karwendel	11.29	47.41	20.10.2013	Muster. C.	Muster. C.	ethanol 96%	ZFMKTIS2504915
ZFMK-TIS-2504916	Opiliones	Nemastomatidae	Nemastoma triste	male	adult	Germany	Bayern	Alpen: Karwendel	11.29	47.41	20.10.2013	Muster. C.	Muster. C.	ethanol 96%	ZFMKTIS2504916
ZFMK-TIS-2504917	Araneae	Linyphiidae	Walckenaeria obtusa	male	adult	Germany	Bayern	Alpen: Karwendel	11.29	47.41	20.10.2013	Muster. C.	Muster. C.	ethanol 96%	ZFMKTIS2504917
ZFMK-TIS-2504920	Araneae	Linyphiidae	Mughiphantes mughi	male	adult	Germany	Bayern	Alpen: Karwendel	11.29	47.41	20.10.2013	Muster. C.	Muster. C.	ethanol 96%	ZFMKTIS2504920
ZFMK-TIS-2504921	Araneae	Linyphiidae	Mughiphantes mughi	female	adult	Germany	Bayern	Alpen: Karwendel	11.29	47.41	20.10.2013	Muster. C.	Muster. C.	ethanol 96%	ZFMKTIS2504921
ZFMK-TIS-2504922	Araneae	Linyphiidae	Oreoneta tatrica	male	adult	Germany	Bayern	Alpen: Karwendel	11.29	47.41	20.10.2013	Muster. C.	Muster. C.	ethanol 96%	ZFMKTIS2504922
ZFMK-TIS-2504923	Araneae	Linyphiidae	Oreoneta tatrica	female	adult	Germany	Bayern	Alpen: Karwendel	11.29	47.41	20.10.2013	Muster. C.	Muster. C.	ethanol 96%	ZFMKTIS2504923
ZFMK-TIS-2504924	Araneae	Linyphiidae	Palliduphantes antroniensis	female	adult	Germany	Bayern	Alpen: Karwendel	11.29	47.41	20.10.2013	Muster. C.	Muster. C.	ethanol 96%	ZFMKTIS2504924
ZFMK-TIS-2504925	Araneae	Linyphiidae	Micrargus georgescuae	male	adult	Germany	Bayern	Alpen: Karwendel	11.29	47.41	20.10.2013	Muster. C.	Huber. B.A.	ethanol 96%	ZFMKTIS2504925
ZFMK-TIS-2504926	Araneae	Linyphiidae	Micrargus georgescuae	female	adult	Germany	Bayern	Alpen: Karwendel	11.29	47.41	20.10.2013	Muster. C.	Muster. C.	ethanol 96%	ZFMKTIS2504926
ZFMK-TIS-2504927	Opiliones	Phalangiidae	Mitopus morio	male	adult	Germany	Bayern	Alpen: Karwendel	11.28	47.41	20.10.2013	Muster. C.	Muster. C.	ethanol 96%	ZFMKTIS2504927
ZFMK-TIS-2504928	Opiliones	Phalangiidae	Mitopus morio	female	adult	Germany	Bayern	Alpen: Karwendel	11.28	47.41	20.10.2013	Muster. C.	Muster. C.	ethanol 96%	ZFMKTIS2504928
ZFMK-TIS-2504929	Araneae	Linyphiidae	Walckenaeria dysderoides	female	adult	Germany	Bayern	Alpen: Karwendel	11.28	47.41	20.10.2013	Muster. C.	Muster. C.	ethanol 96%	ZFMKTIS2504929
ZFMK-TIS-2504930	Araneae	Theridiidae	Robertus scoticus	male	adult	Germany	Bayern	Alpen: Karwendel	11.28	47.41	20.10.2013	Muster. C.	Muster. C.	ethanol 96%	ZFMKTIS2504930
ZFMK-TIS-2504931	Araneae	Theridiidae	Robertus scoticus	female	adult	Germany	Bayern	Alpen: Karwendel	11.28	47.41	20.10.2013	Muster. C.	Muster. C.	ethanol 96%	ZFMKTIS2504931
ZFMK-TIS-2504932	Araneae	Miturgidae	Zora spinimana	male	adult	Germany	Bayern	Alpen: Karwendel	11.28	47.41	20.10.2013	Muster. C.	Muster. C.	ethanol 96%	ZFMKTIS2504932
ZFMK-TIS-2504933	Araneae	Hahniidae	Cryphoeca silvicola	male	adult	Germany	Bayern	Alpen: Karwendel	11.28	47.41	20.10.2013	Muster. C.	Muster. C.	ethanol 96%	ZFMKTIS2504933
ZFMK-TIS-2504934	Araneae	Hahniidae	Cryphoeca silvicola	male	adult	Germany	Bayern	Alpen: Karwendel	11.28	47.41	20.10.2013	Muster. C.	Muster. C.	ethanol 96%	ZFMKTIS2504934
ZFMK-TIS-2504935	Araneae	Linyphiidae	Walckenaeria cuspidata	male	adult	Germany	Bayern	Alpen: Karwendel	11.28	47.41	20.10.2013	Muster. C.	Muster. C.	ethanol 96%	ZFMKTIS2504935
ZFMK-TIS-2504936	Araneae	Linyphiidae	Walckenaeria cuspidata	female	adult	Germany	Bayern	Alpen: Karwendel	11.28	47.41	20.10.2013	Muster. C.	Muster. C.	ethanol 96%	ZFMKTIS2504936
ZFMK-TIS-2504937	Araneae	Linyphiidae	Obscuriphantes obscurus	female	adult	Germany	Bayern	Alpen: Karwendel	11.28	47.41	20.10.2013	Muster. C.	Muster. C.	ethanol 96%	ZFMKTIS2504937
ZFMK-TIS-2504938	Araneae	Linyphiidae	Obscuriphantes obscurus	female	adult	Germany	Bayern	Alpen: Karwendel	11.28	47.41	20.10.2013	Muster. C.	Muster. C.	ethanol 96%	ZFMKTIS2504938
ZFMK-TIS-2504939	Araneae	Linyphiidae	Mughiphantes pulcher	female	adult	Germany	Bayern	Alpen: Karwendel	11.28	47.41	20.10.2013	Muster. C.	Muster. C.	ethanol 96%	ZFMKTIS2504939
ZFMK-TIS-2504943	Araneae	Tetragnathidae	Metellina mengei	male	adult	Germany	Bayern	Alpen: Estergebirge	11.13	47.53	27.10.2013	Muster. C.	Muster. C.	ethanol 96%	ZFMKTIS2504943
ZFMK-TIS-2504945	Araneae	Linyphiidae	Tenuiphantes tenebricola	female	adult	Germany	Bayern	Alpen: Estergebirge	11.14	47.53	27.10.2013	Muster. C.	Muster. C.	ethanol 96%	ZFMKTIS2504945
ZFMK-TIS-2504946	Araneae	Linyphiidae	Tenuiphantes tenebricola	female	adult	Germany	Bayern	Alpen: Estergebirge	11.14	47.53	27.10.2013	Muster. C.	Muster. C.	ethanol 96%	ZFMKTIS2504946
ZFMK-TIS-2504947	Araneae	Linyphiidae	Bolyphantes alticeps	male	adult	Germany	Bayern	Alpen: Estergebirge	11.14	47.53	27.10.2013	Muster. C.	Muster. C.	ethanol 96%	ZFMKTIS2504947
ZFMK-TIS-2504949	Araneae	Linyphiidae	Tapinopa longidens	female	adult	Germany	Bayern	Alpen: Estergebirge	11.14	47.53	27.10.2013	Muster. C.	Muster. C.	ethanol 96%	ZFMKTIS2504949
ZFMK-TIS-2504950	Araneae	Linyphiidae	Palliduphantes montanus	female	adult	Germany	Bayern	Alpen: Estergebirge	11.14	47.53	27.10.2013	Muster. C.	Krammer. H.-J.	ethanol 96%	ZFMKTIS2504950
ZFMK-TIS-2504951	Araneae	Salticidae	Neon reticulatus	female	adult	Germany	Bayern	Alpen: Wetterstreingebirge	11.13	47.42	1.11.2013	Muster. C.	Muster. C.	ethanol 96%	ZFMKTIS2504951
ZFMK-TIS-2504953	Opiliones	Nemastomatidae	Nemastoma triste	male	adult	Germany	Bayern	Alpen: Wetterstreingebirge	11.13	47.42	1.11.2013	Muster. C.	Muster. C.	ethanol 96%	ZFMKTIS2504953
ZFMK-TIS-2504954	Araneae	Linyphiidae	Walckenaeria acuminata	male	adult	Germany	Bayern	Alpen: Wetterstreingebirge	11.13	47.42	1.11.2013	Muster. C.	Muster. C.	ethanol 96%	ZFMKTIS2504954
ZFMK-TIS-2504955	Araneae	Linyphiidae	Anguliphantes monticola	male	adult	Germany	Bayern	Alpen: Wetterstreingebirge	11.13	47.42	1.11.2013	Muster. C.	Krammer. H.-J.	ethanol 96%	ZFMKTIS2504955
ZFMK-TIS-2504956	Araneae	Linyphiidae	Lepthyphantes nodifer	female	adult	Germany	Bayern	Alpen: Wetterstreingebirge	11.13	47.42	1.11.2013	Muster. C.	Krammer. H.-J.	ethanol 96%	ZFMKTIS2504956
ZFMK-TIS-2504957	Araneae	Linyphiidae	Caracladus avicula	male	adult	Germany	Bayern	Alpen: Wetterstreingebirge	11.13	47.42	1.11.2013	Muster. C.	Muster. C.	ethanol 96%	ZFMKTIS2504957
ZFMK-TIS-2504958	Araneae	Linyphiidae	Caracladus avicula	female	adult	Germany	Bayern	Alpen: Wetterstreingebirge	11.13	47.42	1.11.2013	Muster. C.	Muster. C.	ethanol 96%	ZFMKTIS2504958
ZFMK-TIS-2504959	Araneae	Araneidae	Parazygiella montana	male	adult	Germany	Bayern	Alpen: Wetterstreingebirge	11.14	47.42	1.11.2013	Muster. C.	Muster. C.	ethanol 96%	ZFMKTIS2504959
ZFMK-TIS-2504962	Araneae	Linyphiidae	Walckenaeria nudipalpis	female	adult	Germany	Bayern	Alpen: Wetterstreingebirge	11.14	47.42	1.11.2013	Muster. C.	Muster. C.	ethanol 96%	ZFMKTIS2504962
ZFMK-TIS-2504963	Araneae	Theridiidae	Ohlertidion ohlerti	female	adult	Germany	Bayern	Alpen: Wetterstreingebirge	11.14	47.42	1.11.2013	Muster. C.	Muster. C.	ethanol 96%	ZFMKTIS2504963
ZFMK-TIS-2504964	Araneae	Linyphiidae	Diplocephalus helleri	female	adult	Germany	Bayern	Alpen: Wetterstreingebirge	11.14	47.42	1.11.2013	Muster. C.	Muster. C.	ethanol 96%	ZFMKTIS2504964
ZFMK-TIS-2504968	Opiliones	Phalangiidae	Oligolophus tridens	male	adult	Germany	Bayern	Alpen: Wetterstreingebirge	11.15	47.44	1.11.2013	Muster. C.	Muster. C.	ethanol 96%	ZFMKTIS2504968
ZFMK-TIS-2504973	Araneae	Thomisidae	Xysticus acerbus	male	adult	Germany	Mecklenburg-Vorpommern	Rügen	13.65	54.3	20.4.2014	Muster. C.	Muster. C.	ethanol 96%	ZFMKTIS2504973
ZFMK-TIS-2504974	Opiliones	Phalangiidae	Megabunus lesserti	female	adult	Germany	Bayern	Bayern: Ammergebirge	10.83	47.55	22.6.2011	Muster. C.	Muster. C.	ethanol 96%	ZFMKTIS2504974
ZFMK-TIS-2504976	Opiliones	Phalangiidae	Megabunus lesserti	female	adult	Austria		Niederösterreich: Ybbstaler Alpen	15.08	47.81	15.6.2011	Muster. C.	Muster. C.	ethanol 96%	ZFMKTIS2504976
ZFMK-TIS-2504977	Opiliones	Phalangiidae	Megabunus lesserti	female	adult	Austria		Niederösterreich: Ybbstaler Alpen	15.08	47.81	15.6.2011	Muster. C.	Muster. C.	ethanol 96%	ZFMKTIS2504977
ZFMK-TIS-2504980	Araneae	Theridiidae	Anelosimus vittatus	male	adult	Germany	Niedersachsen	Niedersachsen	8.8	53.71	13.5.2014	Muster. C.	Muster. C.	ethanol 96%	ZFMKTIS2504980
ZFMK-TIS-2504981	Araneae	Thomisidae	Xysticus cristatus	male	adult	Germany	Niedersachsen	Niedersachsen	8.8	53.71	13.5.2014	Muster. C.	Muster. C.	ethanol 96%	ZFMKTIS2504981
ZFMK-TIS-2504982	Araneae	Theridiidae	Robertus arundineti	male	adult	Germany	Niedersachsen	Niedersachsen	8.8	53.71	13.5.2014	Muster. C.	Muster. C.	ethanol 96%	ZFMKTIS2504982
ZFMK-TIS-2504983	Araneae	Araneidae	Araneus sturmi	male	adult	Germany	Niedersachsen	Niedersachsen	8.8	53.71	13.5.2014	Muster. C.	Muster. C.	ethanol 96%	ZFMKTIS2504983
ZFMK-TIS-2504984	Araneae	Araneidae	Agalenatea redii	male	adult	Germany	Niedersachsen	Niedersachsen	8.8	53.71	13.5.2014	Muster. C.	Muster. C.	ethanol 96%	ZFMKTIS2504984
ZFMK-TIS-2504985	Araneae	Araneidae	Agalenatea redii	female	adult	Germany	Niedersachsen	Niedersachsen	8.8	53.71	13.5.2014	Muster. C.	Muster. C.	ethanol 96%	ZFMKTIS2504985
ZFMK-TIS-2504986	Araneae	Dictynidae	Lathys humilis	female	adult	Germany	Niedersachsen	Niedersachsen	8.8	53.71	13.5.2014	Muster. C.	Muster. C.	ethanol 96%	ZFMKTIS2504986
ZFMK-TIS-2504988	Araneae	Linyphiidae	Microlinyphia pusilla	female	adult	Germany	Niedersachsen	Niedersachsen	8.8	53.71	13.5.2014	Muster. C.	Muster. C.	ethanol 96%	ZFMKTIS2504988
ZFMK-TIS-2504989	Araneae	Linyphiidae	Microlinyphia pusilla	female	adult	Germany	Niedersachsen	Niedersachsen	8.8	53.71	13.5.2014	Muster. C.	Muster. C.	ethanol 96%	ZFMKTIS2504989
ZFMK-TIS-2504990	Araneae	Theridiidae	Paidiscura pallens	male	adult	Germany	Niedersachsen	Niedersachsen	8.8	53.71	13.5.2014	Muster. C.	Muster. C.	ethanol 96%	ZFMKTIS2504990
ZFMK-TIS-2504991	Araneae	Tetragnathidae	Metellina mengei	male	adult	Germany	Niedersachsen	Niedersachsen	8.8	53.71	13.5.2014	Muster. C.	Muster. C.	ethanol 96%	ZFMKTIS2504991
ZFMK-TIS-2504992	Opiliones	Phalangiidae	Rilaena triangularis	female	adult	Germany	Niedersachsen	Niedersachsen	8.8	53.71	13.5.2014	Muster. C.	Muster. C.	ethanol 96%	ZFMKTIS2504992
ZFMK-TIS-2504993	Araneae	Dictynidae	Lathys humilis	female	adult	Germany	Niedersachsen	Niedersachsen	8.8	53.71	13.5.2014	Muster. C.	Muster. C.	ethanol 96%	ZFMKTIS2504993
ZFMK-TIS-2504994	Araneae	Theridiidae	Paidiscura pallens	female	adult	Germany	Niedersachsen	Niedersachsen	8.8	53.71	13.5.2014	Muster. C.	Muster. C.	ethanol 96%	ZFMKTIS2504994
ZFMK-TIS-2504995	Araneae	Tetragnathidae	Metellina mengei	male	adult	Germany	Niedersachsen	Niedersachsen	8.8	53.71	13.5.2014	Muster. C.	Muster. C.	ethanol 96%	ZFMKTIS2504995
ZFMK-TIS-2504996	Araneae	Theridiidae	Phylloneta sisyphia	male	adult	Germany	Niedersachsen	Niedersachsen	8.8	53.71	13.5.2014	Muster. C.	Muster. C.	ethanol 96%	ZFMKTIS2504996
ZFMK-TIS-2504997	Araneae	Theridiidae	Phylloneta sisyphia	male	adult	Germany	Niedersachsen	Niedersachsen	8.8	53.71	13.5.2014	Muster. C.	Muster. C.	ethanol 96%	ZFMKTIS2504997
ZFMK-TIS-2504998	Araneae	Theridiidae	Episinus angulatus	male	adult	Germany	Niedersachsen	Niedersachsen	8.8	53.71	13.5.2014	Muster. C.	Muster. C.	ethanol 96%	ZFMKTIS2504998
ZFMK-TIS-2504999	Araneae	Linyphiidae	Hypomma cornutum	male	adult	Germany	Niedersachsen	Niedersachsen	8.8	53.71	13.5.2014	Muster. C.	Krammer. H.-J.	ethanol 96%	ZFMKTIS2504999
ZFMK-TIS-2505	Araneae	Linyphiidae	Gongylidiellum latebricola	female	adult	Germany	Sachsen	Weinböhla	13.6	51.18	25.6.2012	Muster. C.	Muster. C.	ethanol 96%	ZFMKTIS2505
ZFMK-TIS-2505001	Araneae	Salticidae	Evarcha falcata	male	adult	Germany	Niedersachsen	Niedersachsen	8.8	53.71	13.5.2014	Muster. C.	Muster. C.	ethanol 96%	ZFMKTIS2505001
ZFMK-TIS-2505002	Araneae	Salticidae	Evarcha falcata	female	adult	Germany	Niedersachsen	Niedersachsen	8.8	53.71	13.5.2014	Muster. C.	Muster. C.	ethanol 96%	ZFMKTIS2505002
ZFMK-TIS-2505003	Opiliones	Phalangiidae	Rilaena triangularis	female	adult	Germany	Niedersachsen	Niedersachsen	8.8	53.71	13.5.2014	Muster. C.	Muster. C.	ethanol 96%	ZFMKTIS2505003
ZFMK-TIS-2505004	Opiliones	Phalangiidae	Platybunus pinetorum	female	adult	Germany	Niedersachsen	Niedersachsen	8.8	53.71	13.5.2014	Muster. C.	Muster. C.	ethanol 96%	ZFMKTIS2505004
ZFMK-TIS-2505005	Araneae	Gnaphosidae	Micaria subopaca	male	adult	Germany	Niedersachsen	Niedersachsen	8.8	53.71	13.5.2014	Muster. C.	Muster. C.	ethanol 96%	ZFMKTIS2505005
ZFMK-TIS-2505006	Araneae	Salticidae	Salticus cingulatus	male	adult	Germany	Niedersachsen	Niedersachsen	8.8	53.71	13.5.2014	Muster. C.	Muster. C.	ethanol 96%	ZFMKTIS2505006
ZFMK-TIS-2505007	Araneae	Salticidae	Salticus cingulatus	male	adult	Germany	Niedersachsen	Niedersachsen	8.8	53.71	13.5.2014	Muster. C.	Muster. C.	ethanol 96%	ZFMKTIS2505007
ZFMK-TIS-2505008	Araneae	Phrurolithidae	Phrurolithus festivus	female	adult	Germany	Niedersachsen	Niedersachsen	8.8	53.71	13.5.2014	Muster. C.	Muster. C.	ethanol 96%	ZFMKTIS2505008
ZFMK-TIS-2505011	Araneae	Lycosidae	Pardosa pullata	female	adult	Germany	Niedersachsen	Niedersachsen	8.8	53.71	13.5.2014	Muster. C.	Muster. C.	ethanol 96%	ZFMKTIS2505011
ZFMK-TIS-2505013	Araneae	Linyphiidae	Tenuiphantes mengei	female	adult	Germany	Niedersachsen	Niedersachsen	8.8	53.71	13.5.2014	Muster. C.	Muster. C.	ethanol 96%	ZFMKTIS2505013
ZFMK-TIS-2505016	Araneae	Philodromidae	Philodromus aureolus	male	adult	Germany	Niedersachsen	Niedersachsen	8.8	53.71	13.5.2014	Muster. C.	Muster. C.	ethanol 96%	ZFMKTIS2505016
ZFMK-TIS-2505018	Araneae	Araneidae	Larinioides patagiatus	male	adult	Germany	Niedersachsen	Niedersachsen	8.8	53.71	13.5.2014	Muster. C.	Muster. C.	ethanol 96%	ZFMKTIS2505018
ZFMK-TIS-2505019	Araneae	Araneidae	Larinioides patagiatus	female	adult	Germany	Niedersachsen	Niedersachsen	8.8	53.71	13.5.2014	Muster. C.	Muster. C.	ethanol 96%	ZFMKTIS2505019
ZFMK-TIS-2505021	Araneae	Philodromidae	Philodromus dispar	male	adult	Germany	Mecklenburg-Vorpommern	Rügen	13.42	53.71	4.6.2014	Muster. C.	Muster. C.	ethanol 96%	ZFMKTIS2505021
ZFMK-TIS-2505023	Araneae	Lycosidae	Trochosa terricola	female	adult	Austria		Nordtirol	11.39	47.31	7.4.2014	Muster. C.	Muster. C.	ethanol 96%	ZFMKTIS2505023
ZFMK-TIS-2505024	Araneae	Dictynidae	Cicurina cicur	female	adult	Austria		Nordtirol	11.39	47.31	7.4.2014	Muster. C.	Muster. C.	ethanol 96%	ZFMKTIS2505024
ZFMK-TIS-2505025	Araneae	Agelenidae	Coelotes terrestris	female	adult	Austria		Nordtirol	11.39	47.31	7.4.2014	Muster. C.	Muster. C.	ethanol 96%	ZFMKTIS2505025
ZFMK-TIS-2505026	Opiliones	Phalangiidae	Amilenus aurantiacus	male	adult	Austria		Nordtirol	11.39	47.31	7.4.2014	Muster. C.	Muster. C.	ethanol 96%	ZFMKTIS2505026
ZFMK-TIS-2505029	Opiliones	Phalangiidae	Amilenus aurantiacus	male	adult	Austria		Nordtirol	11.39	47.3	7.4.2014	Muster. C.	Muster. C.	ethanol 96%	ZFMKTIS2505029
ZFMK-TIS-2505030	Araneae	Gnaphosidae	Micaria aenea	male	adult	Austria		Nordtirol	11.39	47.3	7.4.2014	Muster. C.	Muster. C.	ethanol 96%	ZFMKTIS2505030
ZFMK-TIS-2505031	Araneae	Linyphiidae	Agyneta ressli	male	adult	Austria		Nordtirol	11.39	47.3	7.4.2014	Muster. C.	Muster. C.	ethanol 96%	ZFMKTIS2505031
ZFMK-TIS-2505033	Araneae	Lycosidae	Pardosa amentata	male	adult	Austria		Nordtirol	11.38	47.29	7.4.2014	Muster. C.	Muster. C.	ethanol 96%	ZFMKTIS2505033
ZFMK-TIS-2505034	Araneae	Lycosidae	Pardosa amentata	female	adult	Austria		Nordtirol	11.38	47.29	7.4.2014	Muster. C.	Muster. C.	ethanol 96%	ZFMKTIS2505034
ZFMK-TIS-2506	Araneae	Linyphiidae	Pocadicnemis pumila	female	adult	Germany	Sachsen	Weinböhla	13.6	51.18	25.6.2012	Muster. C.	Krammer. H.-J.	ethanol 96%	ZFMKTIS2506
ZFMK-TIS-2508	Araneae	Theridiidae	Parasteatoda tepidariorum	female	adult	Germany	Sachsen	Weinböhla	13.6	51.18	25.6.2012	Muster. C.	Krammer. H.-J.	ethanol 96%	ZFMKTIS2508
ZFMK-TIS-2510	Araneae	Salticidae	Ballus chalybeius	female	adult	Germany	Sachsen	Weinböhla	13.6	51.18	25.6.2012	Muster. C.	Muster. C.	ethanol 96%	ZFMKTIS2510
ZFMK-TIS-2511	Araneae	Salticidae	Heliophanus dubius	female	adult	Germany	Sachsen	Weinböhla	13.6	51.18	25.6.2012	Muster. C.	Muster. C.	ethanol 96%	ZFMKTIS2511
ZFMK-TIS-2512	Opiliones	Phalangiidae	Lacinius ephippiatus	female	adult	Germany	Sachsen	Spaargebirge. Meißen	13.52	51.14	22.6.2012	Muster. C.	Muster. C.	ethanol 96%	ZFMKTIS2512
ZFMK-TIS-2516	Araneae	Theridiidae	Robertus neglectus	male	adult	Germany	Sachsen	Spaargebirge. Meißen	13.52	51.14	22.6.2012	Muster. C.	Muster. C.	ethanol 96%	ZFMKTIS2516
ZFMK-TIS-2516815	Araneae	Theridiidae	Enoplognatha ovata	male	adult	Germany	Nordrhein-Westfalen	Bonn	7.14	50.69	2.6.2012	Huber. B.A.	Huber. B.A.	ethanol 96%	ZFMKTIS2516815
ZFMK-TIS-2516816	Araneae	Theridiidae	Enoplognatha ovata	male	adult	Germany	Nordrhein-Westfalen	Bonn	7.11	50.69	24.7.2012	Huber. B.A.	Huber. B.A.	ethanol 96%	ZFMKTIS2516816
ZFMK-TIS-2516817	Araneae	Tetragnathidae	Pachygnatha degeeri	male	adult	Austria		Ober-Österreich	14.24	47.85	01.08.2012	Huber. B.A.	Krammer. H.-J.	ethanol 96%	ZFMKTIS2516817
ZFMK-TIS-2516818	Araneae	Tetragnathidae	Tetragnatha montana	male	adult	Germany	Nordrhein-Westfalen	Bonn	7.12	50.67	28.5.2012	Huber. B.A.	Huber. B.A.	ethanol 96%	ZFMKTIS2516818
ZFMK-TIS-2516819	Araneae	Tetragnathidae	Metellina mengei	female	adult	Germany	Nordrhein-Westfalen	Bonn	7.12	50.69	17.5.2012	Huber. B.A.	Huber. B.A.	ethanol 96%	ZFMKTIS2516819
ZFMK-TIS-2516820	Araneae	Tetragnathidae	Metellina mengei	male	adult	Germany	Nordrhein-Westfalen	Bonn	7.3	50.69	10.5.2012	Huber. B.A.	Huber. B.A.	ethanol 96%	ZFMKTIS2516820
ZFMK-TIS-2516821	Araneae	Linyphiidae	Tapinopa longidens	female	adult	Austria		Ober-Österreich	14.17	48.36	01.08.2012	Huber. B.A.	Huber. B.A.	ethanol 96%	ZFMKTIS2516821
ZFMK-TIS-2516822	Araneae	Linyphiidae	Tenuiphantes zimmermanni	female	adult	Germany	Nordrhein-Westfalen	Bonn	7.12	50.67	28.5.2012	Huber. B.A.	Huber. B.A.	ethanol 96%	ZFMKTIS2516822
ZFMK-TIS-2516824	Araneae	Salticidae	Evarcha laetabunda	male	adult	Austria		Ober-Österreich	14.24	47.85	01.08.2012	Huber. B.A.	Huber. B.A.	ethanol 96%	ZFMKTIS2516824
ZFMK-TIS-2516826	Araneae	Araneidae	Araniella cucurbitina	male	adult	Germany	Nordrhein-Westfalen	Bonn	7.07	50.68	24.5.2012	Ahrens. D.	Huber. B.A.	ethanol 96%	ZFMKTIS2516826
ZFMK-TIS-2516827	Araneae	Linyphiidae	Oedothorax retusus	male	adult	Germany	Nordrhein-Westfalen	Bonn	7.16	50.71	17.6.2012	Huber. B.A.	Huber. B.A.	ethanol 96%	ZFMKTIS2516827
ZFMK-TIS-2516828	Araneae	Araneidae	Araneus quadratus	female	adult	Austria		Ober-Österreich	14.24	47.85	01.08.2012	Huber. B.A.	Huber. B.A.	ethanol 96%	ZFMKTIS2516828
ZFMK-TIS-2516829	Araneae	Linyphiidae	Labulla thoracica	female	adult	Germany	Nordrhein-Westfalen	Bonn	7.15	50.69	25.8.2012	Huber. B.A.	Huber. B.A.	ethanol 96%	ZFMKTIS2516829
ZFMK-TIS-2516830	Araneae	Linyphiidae	Lepthyphantes minutus	female	adult	Germany	Nordrhein-Westfalen	Bonn	7.15	50.69	21.8.2012	Huber. B.A.	Huber. B.A.	ethanol 96%	ZFMKTIS2516830
ZFMK-TIS-2516833	Araneae	Clubionidae	Clubiona pallidula	male	adult	Germany	Nordrhein-Westfalen	Bonn	7.3	50.69	10.5.2012	Huber. B.A.	Huber. B.A.	ethanol 96%	ZFMKTIS2516833
ZFMK-TIS-2516834	Araneae	Linyphiidae	Gongylidium rufipes	male	adult	Germany	Nordrhein-Westfalen	Bonn	7.3	50.69	10.5.2012	Huber. B.A.	Huber. B.A.	ethanol 96%	ZFMKTIS2516834
ZFMK-TIS-2516835	Araneae	Dictynidae	Dictyna uncinata	male	adult	Germany	Nordrhein-Westfalen	Bonn	7.3	50.69	10.5.2012	Huber. B.A.	Huber. B.A.	ethanol 96%	ZFMKTIS2516835
ZFMK-TIS-2516836	Araneae	Linyphiidae	Gonatium rubens	male	adult	Austria		Ober-Österreich	14.24	47.85	01.08.2012	Huber. B.A.	Huber. B.A.	ethanol 96%	ZFMKTIS2516836
ZFMK-TIS-2516837	Araneae	Tetragnathidae	Metellina mengei	female	adult	Germany	Nordrhein-Westfalen	Bonn	7.12	50.69	22.6.2012	Huber. B.A.	Huber. B.A.	ethanol 96%	ZFMKTIS2516837
ZFMK-TIS-2516838	Araneae	Lycosidae	Piratula hygrophila	male	adult	Germany	Nordrhein-Westfalen	Bonn	7.3	50.69	10.5.2012	Huber. B.A.	Huber. B.A.	ethanol 96%	ZFMKTIS2516838
ZFMK-TIS-2516839	Araneae	Pisauridae	Pisaura mirabilis	female	adult	Germany	Rheinland-Pfalz	Niederzissen	7.22	50.47	16.5.2012	Wesener. T.	Huber. B.A.	ethanol 96%	ZFMKTIS2516839
ZFMK-TIS-2516842	Araneae	Anyphaenidae	Anyphaena accentuata	male	adult	Germany	Nordrhein-Westfalen	Bonn	7.3	50.69	10.5.2012	Huber. B.A.	Huber. B.A.	ethanol 96%	ZFMKTIS2516842
ZFMK-TIS-2516843	Araneae	Linyphiidae	Gonatium paradoxum	female	adult	Austria		Ober-Österreich	14.24	47.85	01.08.2012	Huber. B.A.	Huber. B.A.	ethanol 96%	ZFMKTIS2516843
ZFMK-TIS-2516844	Araneae	Theridiidae	Platnickina tincta	female	adult	Germany	Nordrhein-Westfalen	Bonn	7.12	50.67	28.5.2012	Huber. B.A.	Huber. B.A.	ethanol 96%	ZFMKTIS2516844
ZFMK-TIS-2516845	Araneae	Dictynidae	Nigma flavescens	male	adult	Germany	Nordrhein-Westfalen	Bonn	7.3	50.69	10.5.2012	Huber. B.A.	Huber. B.A.	ethanol 96%	ZFMKTIS2516845
ZFMK-TIS-2516846	Araneae	Linyphiidae	Tenuiphantes zimmermanni	female	adult	Germany	Nordrhein-Westfalen	Bonn	7.12	50.69	22.6.2012	Huber. B.A.	Huber. B.A.	ethanol 96%	ZFMKTIS2516846
ZFMK-TIS-2516847	Araneae	Agelenidae	Allagelena gracilens	male	adult	Germany	Nordrhein-Westfalen	Bonn	7.15	50.69	29.7.2012	Huber. B.A.	Huber. B.A.	ethanol 96%	ZFMKTIS2516847
ZFMK-TIS-2516848	Araneae	Linyphiidae	Neriene emphana	male	adult	Germany	Nordrhein-Westfalen	Bonn	7.12	50.69	22.6.2012	Huber. B.A.	Huber. B.A.	ethanol 96%	ZFMKTIS2516848
ZFMK-TIS-2516849	Araneae	Clubionidae	Clubiona comta	male	adult	Germany	Nordrhein-Westfalen	Bonn	7.3	50.69	10.5.2012	Huber. B.A.	Huber. B.A.	ethanol 96%	ZFMKTIS2516849
ZFMK-TIS-2516850	Araneae	Tetragnathidae	Metellina segmentata	male	adult	Germany	Nordrhein-Westfalen	Bonn	7.12	50.67	16.9.2012	Huber. B.A.	Huber. B.A.	ethanol 96%	ZFMKTIS2516850
ZFMK-TIS-2516851	Araneae	Tetragnathidae	Pachygnatha degeeri	male	adult	Germany	Nordrhein-Westfalen	Rhein-Sieg-Kreis	7.31	50.83	29.9.2012	Huber. B.A.	Huber. B.A.	ethanol 96%	ZFMKTIS2516851
ZFMK-TIS-2516853	Araneae	Dysderidae	Dysdera erythrina	male	adult	Germany	Rheinland-Pfalz	Niederzissen	7.22	50.47	22.10.2012	Wesener. T.	Huber. B.A.	ethanol 96%	ZFMKTIS2516853
ZFMK-TIS-2516855	Araneae	Tetragnathidae	Pachygnatha listeri	male	adult	Germany	Nordrhein-Westfalen	Bonn	7.12	50.67	16.9.2012	Huber. B.A.	Huber. B.A.	ethanol 96%	ZFMKTIS2516855
ZFMK-TIS-2516856	Araneae	Tetragnathidae	Pachygnatha listeri	female	adult	Germany	Nordrhein-Westfalen	Bonn	7.12	50.67	16.9.2012	Huber. B.A.	Huber. B.A.	ethanol 96%	ZFMKTIS2516856
ZFMK-TIS-2516857	Araneae	Linyphiidae	Neriene clathrata	male	adult	Germany	Nordrhein-Westfalen	Bonn	7.11	50.68	7.10.2012	Huber. B.A.	Huber. B.A.	ethanol 96%	ZFMKTIS2516857
ZFMK-TIS-2516858	Araneae	Linyphiidae	Neriene clathrata	male	adult	Germany	Nordrhein-Westfalen	Bonn	7.11	50.68	7.10.2012	Huber. B.A.	Huber. B.A.	ethanol 96%	ZFMKTIS2516858
ZFMK-TIS-2516859	Araneae	Linyphiidae	Walckenaeria unicornis	male	adult	Germany	Nordrhein-Westfalen	Bonn	7.11	50.68	7.10.2012	Huber. B.A.	Huber. B.A.	ethanol 96%	ZFMKTIS2516859
ZFMK-TIS-2516860	Araneae	Linyphiidae	Walckenaeria unicornis	male	adult	Germany	Nordrhein-Westfalen	Bonn	7.11	50.68	7.10.2012	Huber. B.A.	Huber. B.A.	ethanol 96%	ZFMKTIS2516860
ZFMK-TIS-2516861	Araneae	Clubionidae	Clubiona subtilis	male	adult	Germany	Nordrhein-Westfalen	Bonn	7.12	50.67	16.9.2012	Huber. B.A.	Krammer. H.-J.	ethanol 96%	ZFMKTIS2516861
ZFMK-TIS-2516862	Araneae	Thomisidae	Ozyptila brevipes	male	adult	Germany	Nordrhein-Westfalen	Bonn	7.11	50.68	7.10.2012	Huber. B.A.	Krammer. H.-J.	ethanol 96%	ZFMKTIS2516862
ZFMK-TIS-2516863	Araneae	Linyphiidae	Walckenaeria unicornis	male	adult	Germany	Nordrhein-Westfalen	Bonn	7.12	50.67	16.9.2012	Huber. B.A.	Huber. B.A.	ethanol 96%	ZFMKTIS2516863
ZFMK-TIS-2516864	Araneae	Linyphiidae	Lepthyphantes keyserlingi	male	adult	Germany	Rheinland-Pfalz	Niederzissen	7.23	50.47	22.10.2012	Huber. B.A.	Huber. B.A.	ethanol 96%	ZFMKTIS2516864
ZFMK-TIS-2516865	Araneae	Clubionidae	Clubiona subtilis	male	adult	Germany	Nordrhein-Westfalen	Bonn	7.11	50.68	7.10.2012	Huber. B.A.	Krammer. H.-J.	ethanol 96%	ZFMKTIS2516865
ZFMK-TIS-2516868	Araneae	Thomisidae	Ebrechtella tricuspidata	male	adult	Germany	Nordrhein-Westfalen	Bonn	7.12	50.67	16.9.2012	Huber. B.A.	Huber. B.A.	ethanol 96%	ZFMKTIS2516868
ZFMK-TIS-2516869	Araneae	Thomisidae	Ebrechtella tricuspidata	male	adult	Germany	Nordrhein-Westfalen	Bonn	7.12	50.67	16.9.2012	Huber. B.A.	Huber. B.A.	ethanol 96%	ZFMKTIS2516869
ZFMK-TIS-2516870	Araneae	Salticidae	Synageles venator	male	adult	Germany	Nordrhein-Westfalen	Bonn	7.11	50.68	7.10.2012	Huber. B.A.	Huber. B.A.	ethanol 96%	ZFMKTIS2516870
ZFMK-TIS-2516871	Araneae	Salticidae	Evarcha arcuata	male	adult	Germany	Nordrhein-Westfalen	Bonn	7.12	50.67	16.9.2012	Huber. B.A.	Huber. B.A.	ethanol 96%	ZFMKTIS2516871
ZFMK-TIS-2516872	Araneae	Salticidae	Evarcha arcuata	male	adult	Germany	Nordrhein-Westfalen	Bonn	7.12	50.67	16.9.2012	Huber. B.A.	Huber. B.A.	ethanol 96%	ZFMKTIS2516872
ZFMK-TIS-2516873	Araneae	Linyphiidae	Floronia bucculenta	male	adult	Germany	Nordrhein-Westfalen	Bonn	7.12	50.67	16.9.2012	Huber. B.A.	Huber. B.A.	ethanol 96%	ZFMKTIS2516873
ZFMK-TIS-2516874	Araneae	Linyphiidae	Floronia bucculenta	female	adult	Germany	Nordrhein-Westfalen	Bonn	7.12	50.67	16.9.2012	Huber. B.A.	Huber. B.A.	ethanol 96%	ZFMKTIS2516874
ZFMK-TIS-2516875	Araneae	Linyphiidae	Linyphia triangularis	male	adult	Germany	Nordrhein-Westfalen	Bonn	7.12	50.67	16.9.2012	Huber. B.A.	Huber. B.A.	ethanol 96%	ZFMKTIS2516875
ZFMK-TIS-2516876	Araneae	Mimetidae	Ero furcata	male	adult	Germany	Nordrhein-Westfalen	Bonn	7.12	50.67	16.9.2012	Huber. B.A.	Huber. B.A.	ethanol 96%	ZFMKTIS2516876
ZFMK-TIS-2516877	Araneae	Agelenidae	Histopona torpida	male	adult	Germany	Nordrhein-Westfalen	Rhein-Sieg-Kreis	7.31	50.83	29.9.2012	Huber. B.A.	Huber. B.A.	ethanol 96%	ZFMKTIS2516877
ZFMK-TIS-2516878	Araneae	Miturgidae	Zora spinimana	male	adult	Germany	Nordrhein-Westfalen	Bonn	7.12	50.67	16.9.2012	Huber. B.A.	Huber. B.A.	ethanol 96%	ZFMKTIS2516878
ZFMK-TIS-2516879	Araneae	Tetragnathidae	Metellina segmentata	male	adult	Germany	Nordrhein-Westfalen	Bonn	7.12	50.67	16.9.2012	Huber. B.A.	Huber. B.A.	ethanol 96%	ZFMKTIS2516879
ZFMK-TIS-2516880	Araneae	Tetragnathidae	Metellina segmentata	female	adult	Germany	Nordrhein-Westfalen	Bonn	7.12	50.67	16.9.2012	Huber. B.A.	Huber. B.A.	ethanol 96%	ZFMKTIS2516880
ZFMK-TIS-2516882	Araneae	Clubionidae	Clubiona terrestris	male	adult	Germany	Nordrhein-Westfalen	Bonn	7.12	50.67	16.9.2012	Huber. B.A.	Huber. B.A.	ethanol 96%	ZFMKTIS2516882
ZFMK-TIS-2516883	Araneae	Segestriidae	Segestria senoculata	female	adult	Germany	Nordrhein-Westfalen	Bonn	7.12	50.67	16.9.2012	Huber. B.A.	Huber. B.A.	ethanol 96%	ZFMKTIS2516883
ZFMK-TIS-2516884	Araneae	Linyphiidae	Microneta viaria	male	adult	Germany	Nordrhein-Westfalen	Rhein-Sieg-Kreis	7.31	50.83	29.9.2012	Huber. B.A.	Huber. B.A.	ethanol 96%	ZFMKTIS2516884
ZFMK-TIS-2516885	Araneae	Linyphiidae	Microneta viaria	male	adult	Germany	Nordrhein-Westfalen	Rhein-Sieg-Kreis	7.31	50.83	29.9.2012	Huber. B.A.	Huber. B.A.	ethanol 96%	ZFMKTIS2516885
ZFMK-TIS-2516886	Araneae	Agelenidae	Coelotes terrestris	female	adult	Germany	Nordrhein-Westfalen	Rhein-Sieg-Kreis	7.31	50.83	29.9.2012	Huber. B.A.	Huber. B.A.	ethanol 96%	ZFMKTIS2516886
ZFMK-TIS-2516887	Araneae	Linyphiidae	Macrargus rufus	male	adult	Germany	Nordrhein-Westfalen	Rhein-Sieg-Kreis	7.31	50.83	29.9.2012	Huber. B.A.	Huber. B.A.	ethanol 96%	ZFMKTIS2516887
ZFMK-TIS-2516888	Araneae	Linyphiidae	Neriene clathrata	male	adult	Germany	Nordrhein-Westfalen	Rhein-Sieg-Kreis	7.31	50.83	29.9.2012	Huber. B.A.	Huber. B.A.	ethanol 96%	ZFMKTIS2516888
ZFMK-TIS-2516889	Araneae	Linyphiidae	Neriene clathrata	female	adult	Germany	Nordrhein-Westfalen	Rhein-Sieg-Kreis	7.31	50.83	29.9.2012	Huber. B.A.	Huber. B.A.	ethanol 96%	ZFMKTIS2516889
ZFMK-TIS-2516890	Araneae	Linyphiidae	Labulla thoracica	male	adult	Germany	Nordrhein-Westfalen	Bonn	7.12	50.67	16.9.2012	Huber. B.A.	Huber. B.A.	ethanol 96%	ZFMKTIS2516890
ZFMK-TIS-2516892	Araneae	Linyphiidae	Gonatium rubellum	male	adult	Germany	Nordrhein-Westfalen	Bonn	7.11	50.69	20.10.2012	Huber. B.A.	Huber. B.A.	ethanol 96%	ZFMKTIS2516892
ZFMK-TIS-2516893	Araneae	Linyphiidae	Macrargus rufus	male	adult	Germany	Nordrhein-Westfalen	Bonn	7.11	50.69	20.10.2012	Huber. B.A.	Huber. B.A.	ethanol 96%	ZFMKTIS2516893
ZFMK-TIS-2516894	Araneae	Linyphiidae	Macrargus rufus	female	adult	Germany	Nordrhein-Westfalen	Bonn	7.11	50.69	20.10.2012	Huber. B.A.	Huber. B.A.	ethanol 96%	ZFMKTIS2516894
ZFMK-TIS-2516895	Araneae	Liocranidae	Agroeca brunnea	male	adult	Germany	Nordrhein-Westfalen	Bonn	7.11	50.69	20.10.2012	Huber. B.A.	Huber. B.A.	ethanol 96%	ZFMKTIS2516895
ZFMK-TIS-2516896	Araneae	Tetragnathidae	Pachygnatha clercki	male	adult	Germany	Nordrhein-Westfalen	Rhein-Sieg-Kreis	7.31	50.83	29.9.2012	Huber. B.A.	Huber. B.A.	ethanol 96%	ZFMKTIS2516896
ZFMK-TIS-2516898	Araneae	Linyphiidae	Oedothorax retusus	male	adult	Germany	Nordrhein-Westfalen	Rhein-Sieg-Kreis	7.31	50.83	29.9.2012	Huber. B.A.	Huber. B.A.	ethanol 96%	ZFMKTIS2516898
ZFMK-TIS-2516899	Araneae	Tetragnathidae	Pachygnatha clercki	female	adult	Germany	Nordrhein-Westfalen	Wuppertal	7.06	51.23	18.10.2012	Huber. B.A.	Huber. B.A.	ethanol 96%	ZFMKTIS2516899
ZFMK-TIS-2516900	Araneae	Linyphiidae	Gonatium rubellum	male	adult	Germany	Nordrhein-Westfalen	Wuppertal	7.06	51.23	18.10.2012	Huber. B.A.	Huber. B.A.	ethanol 96%	ZFMKTIS2516900
ZFMK-TIS-2516901	Araneae	Linyphiidae	Macrargus rufus	male	adult	Germany	Nordrhein-Westfalen	Wuppertal	7.06	51.23	18.10.2012	Huber. B.A.	Huber. B.A.	ethanol 96%	ZFMKTIS2516901
ZFMK-TIS-2516903	Araneae	Linyphiidae	Centromerita bicolor	male	adult	Germany	Nordrhein-Westfalen	Wuppertal	7.06	51.23	18.10.2012	Huber. B.A.	Huber. B.A.	ethanol 96%	ZFMKTIS2516903
ZFMK-TIS-2516906	Araneae	Linyphiidae	Diplocephalus latifrons	male	adult	Germany	Nordrhein-Westfalen	Wuppertal	7.06	51.23	18.10.2012	Huber. B.A.	Huber. B.A.	ethanol 96%	ZFMKTIS2516906
ZFMK-TIS-2516907	Araneae	Liocranidae	Apostenus fuscus	male	adult	Germany	Nordrhein-Westfalen	Wuppertal	7.06	51.23	18.10.2012	Huber. B.A.	Huber. B.A.	ethanol 96%	ZFMKTIS2516907
ZFMK-TIS-2516908	Araneae	Liocranidae	Apostenus fuscus	female	adult	Germany	Nordrhein-Westfalen	Wuppertal	7.06	51.23	18.10.2012	Huber. B.A.	Huber. B.A.	ethanol 96%	ZFMKTIS2516908
ZFMK-TIS-2517	Araneae	Theridiidae	Episinus angulatus	female	adult	Germany	Sachsen	Spaargebirge. Meißen	13.52	51.14	22.6.2012	Muster. C.	Muster. C.	ethanol 96%	ZFMKTIS2517
ZFMK-TIS-2517005	Araneae	Agelenidae	Histopona torpida	female	adult	Germany	Nordrhein-Westfalen	Wuppertal	7.06	51.23	18.10.2012	Huber. B.A.	Huber. B.A.	ethanol 96%	ZFMKTIS2517005
ZFMK-TIS-2517006	Araneae	Agelenidae	Coelotes terrestris	female	adult	Germany	Nordrhein-Westfalen	Wuppertal	7.06	51.23	18.10.2012	Huber. B.A.	Huber. B.A.	ethanol 96%	ZFMKTIS2517006
ZFMK-TIS-2517007	Araneae	Agelenidae	Coelotes terrestris	female	adult	Germany	Nordrhein-Westfalen	Wuppertal	7.06	51.23	18.10.2012	Huber. B.A.	Huber. B.A.	ethanol 96%	ZFMKTIS2517007
ZFMK-TIS-2517008	Araneae	Tetragnathidae	Metellina mengei	male	adult	Germany	Nordrhein-Westfalen	Wuppertal	7.06	51.23	18.10.2012	Huber. B.A.	Huber. B.A.	ethanol 96%	ZFMKTIS2517008
ZFMK-TIS-2517009	Araneae	Salticidae	Neon reticulatus	female	adult	Germany	Nordrhein-Westfalen	Bonn	7.07	50.66	21.10.2012	Huber. B.A.	Huber. B.A.	ethanol 96%	ZFMKTIS2517009
ZFMK-TIS-2517010	Araneae	Thomisidae	Ozyptila atomaria	male	adult	Germany	Nordrhein-Westfalen	Bonn	7.07	50.66	21.10.2012	Huber. B.A.	Huber. B.A.	ethanol 96%	ZFMKTIS2517010
ZFMK-TIS-2517012	Araneae	Linyphiidae	Diplostyla concolor	male	adult	Germany	Nordrhein-Westfalen	Bonn	7.07	50.66	21.10.2012	Huber. B.A.	Huber. B.A.	ethanol 96%	ZFMKTIS2517012
ZFMK-TIS-2517013	Araneae	Linyphiidae	Erigonella hiemalis	male	adult	Germany	Nordrhein-Westfalen	Bonn	7.07	50.66	21.10.2012	Huber. B.A.	Huber. B.A.	ethanol 96%	ZFMKTIS2517013
ZFMK-TIS-2517014	Araneae	Hahniidae	Antistea elegans	female	adult	Germany	Nordrhein-Westfalen	Bonn	7.07	50.66	21.10.2012	Huber. B.A.	Huber. B.A.	ethanol 96%	ZFMKTIS2517014
ZFMK-TIS-2517015	Araneae	Linyphiidae	Neriene clathrata	male	adult	Germany	Nordrhein-Westfalen	Bonn	7.07	50.66	21.10.2012	Huber. B.A.	Huber. B.A.	ethanol 96%	ZFMKTIS2517015
ZFMK-TIS-2517016	Araneae	Linyphiidae	Neriene clathrata	male	adult	Germany	Nordrhein-Westfalen	Bonn	7.07	50.66	21.10.2012	Huber. B.A.	Huber. B.A.	ethanol 96%	ZFMKTIS2517016
ZFMK-TIS-2517017	Araneae	Linyphiidae	Centromerus sylvaticus	male	adult	Germany	Nordrhein-Westfalen	Bonn	7.07	50.66	21.10.2012	Huber. B.A.	Huber. B.A.	ethanol 96%	ZFMKTIS2517017
ZFMK-TIS-2517018	Araneae	Linyphiidae	Centromerus sylvaticus	female	adult	Germany	Nordrhein-Westfalen	Bonn	7.07	50.66	21.10.2012	Huber. B.A.	Huber. B.A.	ethanol 96%	ZFMKTIS2517018
ZFMK-TIS-2517019	Araneae	Linyphiidae	Bathyphantes nigrinus	male	adult	Germany	Nordrhein-Westfalen	Bonn	7.07	50.66	21.10.2012	Huber. B.A.	Huber. B.A.	ethanol 96%	ZFMKTIS2517019
ZFMK-TIS-2517020	Araneae	Linyphiidae	Bathyphantes nigrinus	female	adult	Germany	Nordrhein-Westfalen	Bonn	7.07	50.66	21.10.2012	Huber. B.A.	Huber. B.A.	ethanol 96%	ZFMKTIS2517020
ZFMK-TIS-2517024	Araneae	Amaurobiidae	Amaurobius similis	male	adult	Germany	Nordrhein-Westfalen	Bonn	7.15	50.69	10.11.2012	Huber. B.A.	Huber. B.A.	ethanol 96%	ZFMKTIS2517024
ZFMK-TIS-2517025	Araneae	Segestriidae	Segestria bavarica	male	adult	Germany	Nordrhein-Westfalen	Bonn	7.15	50.69	15.9.2012	Huber. B.A.	Huber. B.A.	ethanol 96%	ZFMKTIS2517025
ZFMK-TIS-2517027	Araneae	Araneidae	Zygiella x-notata	male	adult	Germany	Nordrhein-Westfalen	Bonn	7.11	50.72	12.9.2012	Huber. B.A.	Huber. B.A.	ethanol 96%	ZFMKTIS2517027
ZFMK-TIS-2517028	Araneae	Scytodidae	Scytodes thoracica	female	adult	Germany	Nordrhein-Westfalen	Bonn	7.11	50.72	6.11.2012	Huber. B.A.	Huber. B.A.	ethanol 96%	ZFMKTIS2517028
ZFMK-TIS-2517031	Araneae	Linyphiidae	Diplocephalus cristatus	male	adult	Germany	Nordrhein-Westfalen	Bonn	7.11	50.72	29.7.2012	Beller. J.	Huber. B.A.	ethanol 96%	ZFMKTIS2517031
ZFMK-TIS-2517032	Araneae	Linyphiidae	Oedothorax agrestis	male	adult	Germany	Nordrhein-Westfalen	Bonn	7.08	50.67	28.10.2012	Huber. B.A.	Muster. C.	ethanol 96%	ZFMKTIS2517032
ZFMK-TIS-2517033	Araneae	Linyphiidae	Helophora insignis	male	adult	Germany	Nordrhein-Westfalen	Bonn	7.08	50.67	28.10.2012	Huber. B.A.	Huber. B.A.	ethanol 96%	ZFMKTIS2517033
ZFMK-TIS-2517034	Araneae	Linyphiidae	Helophora insignis	male	adult	Germany	Nordrhein-Westfalen	Bonn	7.08	50.67	28.10.2012	Huber. B.A.	Huber. B.A.	ethanol 96%	ZFMKTIS2517034
ZFMK-TIS-2517035	Araneae	Linyphiidae	Bathyphantes gracilis	male	adult	Germany	Nordrhein-Westfalen	Bonn	7.08	50.67	28.10.2012	Huber. B.A.	Huber. B.A.	ethanol 96%	ZFMKTIS2517035
ZFMK-TIS-2517036	Araneae	Linyphiidae	Bathyphantes gracilis	male	adult	Germany	Nordrhein-Westfalen	Bonn	7.08	50.67	28.10.2012	Huber. B.A.	Huber. B.A.	ethanol 96%	ZFMKTIS2517036
ZFMK-TIS-2517037	Araneae	Linyphiidae	Bathyphantes similis	male	adult	Germany	Nordrhein-Westfalen	Bonn	7.08	50.67	28.10.2012	Huber. B.A.	Muster. C.	ethanol 96%	ZFMKTIS2517037
ZFMK-TIS-2517038	Araneae	Linyphiidae	Bathyphantes nigrinus	male	adult	Germany	Nordrhein-Westfalen	Bonn	7.08	50.67	28.10.2012	Huber. B.A.	Huber. B.A.	ethanol 96%	ZFMKTIS2517038
ZFMK-TIS-2517041	Araneae	Linyphiidae	Drapetisca socialis	male	adult	Germany	Nordrhein-Westfalen	Bonn	7.08	50.67	4.11.2012	Huber. B.A.	Huber. B.A.	ethanol 96%	ZFMKTIS2517041
ZFMK-TIS-2517043	Araneae	Amaurobiidae	Amaurobius fenestralis	male	adult	Germany	Nordrhein-Westfalen	Bonn	7.08	50.67	4.11.2012	Huber. B.A.	Huber. B.A.	ethanol 96%	ZFMKTIS2517043
ZFMK-TIS-2517044	Araneae	Amaurobiidae	Amaurobius fenestralis	female	adult	Germany	Nordrhein-Westfalen	Bonn	7.08	50.67	4.11.2012	Huber. B.A.	Huber. B.A.	ethanol 96%	ZFMKTIS2517044
ZFMK-TIS-2517045	Araneae	Linyphiidae	Lepthyphantes minutus	male	adult	Germany	Nordrhein-Westfalen	Bonn	7.08	50.67	4.11.2012	Huber. B.A.	Huber. B.A.	ethanol 96%	ZFMKTIS2517045
ZFMK-TIS-2517046	Araneae	Agelenidae	Eratigena atrica	male	adult	Germany	Nordrhein-Westfalen	Windeck. Rhein-Sieg-Kreis	7.58	50.81	29.8.2012	Rulik. B.	Huber. B.A.	ethanol 96%	ZFMKTIS2517046
ZFMK-TIS-2517048	Araneae	Linyphiidae	Maso sundevalli	male	adult	Germany	Nordrhein-Westfalen	Bonn	7.15	50.69	2.6.2012	Huber. B.A.	Huber. B.A.	ethanol 96%	ZFMKTIS2517048
ZFMK-TIS-2517049	Araneae	Dictynidae	Lathys humilis	male	adult	Germany	Nordrhein-Westfalen	Bonn	7.3	50.69	10.5.2012	Huber. B.A.	Huber. B.A.	ethanol 96%	ZFMKTIS2517049
ZFMK-TIS-2517050	Araneae	Theridiidae	Paidiscura pallens	male	adult	Germany	Nordrhein-Westfalen	Bonn	7.3	50.69	10.5.2012	Huber. B.A.	Huber. B.A.	ethanol 96%	ZFMKTIS2517050
ZFMK-TIS-2517052	Araneae	Agelenidae	Coelotes terrestris	male	adult	Germany	Nordrhein-Westfalen	Bonn	7.04	50.66	25.8.2012	Ahrens. D.; Fabrizi. S.	Huber. B.A.	ethanol 96%	ZFMKTIS2517052
ZFMK-TIS-2517053	Araneae	Agelenidae	Coelotes terrestris	male	adult	Germany	Nordrhein-Westfalen	Bonn	7.04	50.66	25.8.2012	Ahrens. D.; Fabrizi. S.	Huber. B.A.	ethanol 96%	ZFMKTIS2517053
ZFMK-TIS-2517054	Araneae	Thomisidae	Xysticus ulmi	male	adult	Germany	Nordrhein-Westfalen	Bonn	7.08	50.67	24.5.2012	Arthropod course 3	Huber. B.A.	ethanol 96%	ZFMKTIS2517054
ZFMK-TIS-2517057	Araneae	Linyphiidae	Tenuiphantes tenuis	male	adult	Germany	Nordrhein-Westfalen	Bonn	7.12	50.67	23.9.2012	Huber. B.A.	Huber. B.A.	ethanol 96%	ZFMKTIS2517057
ZFMK-TIS-2517060	Araneae	Linyphiidae	Neriene clathrata	male	adult	Germany	Nordrhein-Westfalen	Bonn	7.12	50.67	23.9.2012	Huber. B.A.	Huber. B.A.	ethanol 96%	ZFMKTIS2517060
ZFMK-TIS-2517061	Araneae	Linyphiidae	Dismodicus bifrons	male	adult	Germany	Nordrhein-Westfalen	Bonn	7.12	50.67	23.9.2012	Huber. B.A.	Huber. B.A.	ethanol 96%	ZFMKTIS2517061
ZFMK-TIS-2517064	Araneae	Dictynidae	Cicurina cicur	male	adult	Germany	Nordrhein-Westfalen	Heimbach	6.47	50.63	7.6.2012	Wesener. T.; Klug. T.	Krammer. H.-J.	ethanol 96%	ZFMKTIS2517064
ZFMK-TIS-2517067	Araneae	Araneidae	Gibbaranea gibbosa	female	adult	Germany	Rheinland-Pfalz	Niederzissen	7.22	50.47	16.5.2012	Wesener. T.; Klug. T.	Krammer. H.-J.	ethanol 96%	ZFMKTIS2517067
ZFMK-TIS-2517068	Araneae	Gnaphosidae	Haplodrassus silvestris	female	adult	Germany	Nordrhein-Westfalen	Bonn	7.12	50.69	24.7.2012	Huber. B.A.	Krammer. H.-J.	ethanol 96%	ZFMKTIS2517068
ZFMK-TIS-2517069	Araneae	Dictynidae	Cicurina cicur	male	adult	Germany	Nordrhein-Westfalen	Bonn	7.07	50.66	21.10.2012	Huber. B.A.	Krammer. H.-J.	ethanol 96%	ZFMKTIS2517069
ZFMK-TIS-2517070	Araneae	Dictynidae	Cicurina cicur	female	adult	Germany	Nordrhein-Westfalen	Bonn	7.07	50.66	21.10.2012	Huber. B.A.	Krammer. H.-J.	ethanol 96%	ZFMKTIS2517070
ZFMK-TIS-2517071	Araneae	Thomisidae	Xysticus bifasciatus	female	adult	Austria		Walding	14.17	48.36	01.08.2012	Huber. B.A.	Huber. B.A.	ethanol 96%	ZFMKTIS2517071
ZFMK-TIS-2517072	Araneae	Agelenidae	Coelotes terrestris	female	adult	Germany	Nordrhein-Westfalen	Bonn	7.08	50.68	19.4.2013	Huber. B.A.	Krammer. H.-J.	ethanol 96%	ZFMKTIS2517072
ZFMK-TIS-2517076	Araneae	Amaurobiidae	Amaurobius fenestralis	female	adult	Germany	Nordrhein-Westfalen	Bonn	7.08	50.68	19.4.2013	Arthropod course 3	Krammer. H.-J.	ethanol 96%	ZFMKTIS2517076
ZFMK-TIS-2517077	Araneae	Theridiidae	Parasteatoda tepidariorum	male	adult	Germany	Nordrhein-Westfalen	Bonn	7.15	50.69	24.6.2012	Huber. B.A.	Krammer. H.-J.	ethanol 96%	ZFMKTIS2517077
ZFMK-TIS-2517078	Araneae	Theridiidae	Neottiura bimaculata	female	adult	Germany	Nordrhein-Westfalen	Bonn	7.15	50.69	24.6.2012	Huber. B.A.	Wunderlich. J.	ethanol 96%	ZFMKTIS2517078
ZFMK-TIS-2517079	Araneae	Thomisidae	Ozyptila brevipes	female	adult	Germany	Nordrhein-Westfalen	Bonn	7.11	50.68	7.10.2012	Huber. B.A.	Wunderlich. J.	ethanol 96%	ZFMKTIS2517079
ZFMK-TIS-2517080	Araneae	Linyphiidae	Tenuiphantes tenuis	male	adult	Germany	Nordrhein-Westfalen	Bonn	7.12	50.67	16.9.2012	Huber. B.A.	Wunderlich. J.	ethanol 96%	ZFMKTIS2517080
ZFMK-TIS-2517081	Araneae	Linyphiidae	Tenuiphantes mengei	male	adult	Germany	Nordrhein-Westfalen	Bonn	7.12	50.67	16.9.2012	Huber. B.A.	Wunderlich. J.	ethanol 96%	ZFMKTIS2517081
ZFMK-TIS-2517082	Araneae	Linyphiidae	Micrargus herbigradus	female	adult	Germany	Rheinland-Pfalz	Westerwald	7.71	50.71	9.11.2012	Wesener. T.; Klug. T.	Krammer. H.-J.	ethanol 96%	ZFMKTIS2517082
ZFMK-TIS-2517083	Araneae	Linyphiidae	Micrargus subaequalis	male	adult	Germany	Nordrhein-Westfalen	Bonn	7.15	50.69	24.6.2012	Huber. B.A.	Wunderlich. J.	ethanol 96%	ZFMKTIS2517083
ZFMK-TIS-2517085	Araneae	Linyphiidae	Micrargus herbigradus	female	adult	Germany	Nordrhein-Westfalen	Siegburg	7.31	50.83	29.9.2012	Huber. B.A.	Wunderlich. J.	ethanol 96%	ZFMKTIS2517085
ZFMK-TIS-2517086	Araneae	Linyphiidae	Tenuiphantes flavipes	male	adult	Germany	Nordrhein-Westfalen	Siegburg	7.31	50.83	29.9.2012	Huber. B.A.	Wunderlich. J.	ethanol 96%	ZFMKTIS2517086
ZFMK-TIS-2517087	Araneae	Linyphiidae	Kaestneria dorsalis	female	adult	Germany	Nordrhein-Westfalen	Bonn	7.3	50.69	10.5.2012	Huber. B.A. et al.	Wunderlich. J.	ethanol 96%	ZFMKTIS2517087
ZFMK-TIS-2517088	Araneae	Salticidae	Marpissa muscosa	female	adult	Germany	Nordrhein-Westfalen	Bonn	7.12	50.67	16.9.2012	Huber. B.A.	Wunderlich. J.	ethanol 96%	ZFMKTIS2517088
ZFMK-TIS-2517089	Araneae	Thomisidae	Xysticus kochi	female	adult	Germany	Nordrhein-Westfalen	Bonn	7.3	50.69	10.5.2012	Huber. B.A. et al.	Krammer. H.-J.	ethanol 96%	ZFMKTIS2517089
ZFMK-TIS-2517090	Araneae	Gnaphosidae	Drassyllus pusillus	female	adult	Germany	Rheinland-Pfalz	Niederzissen	7.22	50.46	16.5.2012	Wesener. T. et al.	Krammer. H.-J.	ethanol 96%	ZFMKTIS2517090
ZFMK-TIS-2517092	Araneae	Gnaphosidae	Drassodes lapidosus	female	adult	Germany	Rheinland-Pfalz	Niederzissen	7.22	50.46	16.5.2012	Wesener. T. et al.	Muster. C.	ethanol 96%	ZFMKTIS2517092
ZFMK-TIS-2517093	Araneae	Linyphiidae	Gongylidium rufipes	female	adult	Germany	Nordrhein-Westfalen	Bonn	7.07	50.68	24.5.2012	Ahrens. D. et al.	Krammer. H.-J.	ethanol 96%	ZFMKTIS2517093
ZFMK-TIS-2517094	Araneae	Linyphiidae	Tenuiphantes zimmermanni	female	adult	Germany	Nordrhein-Westfalen	Bonn	7.08	50.67	4.11.2012	Huber. B.A.	Krammer. H.-J.	ethanol 96%	ZFMKTIS2517094
ZFMK-TIS-2517095	Araneae	Linyphiidae	Lepthyphantes leprosus	male	adult	Germany	Nordrhein-Westfalen	Bonn	7.11	50.72	26.7.2012	Huber. B.A.	Wunderlich. J.	ethanol 96%	ZFMKTIS2517095
ZFMK-TIS-2517096	Araneae	Linyphiidae	Centromerus sylvaticus	female	adult	Germany	Nordrhein-Westfalen	Bonn	7.08	50.67	4.11.2012	Huber. B.A.	Wunderlich. J.	ethanol 96%	ZFMKTIS2517096
ZFMK-TIS-2517097	Araneae	Linyphiidae	Tenuiphantes tenuis	female	adult	Germany	Nordrhein-Westfalen	Siegburg	7.31	50.83	29.9.2012	Huber. B.A.	Wunderlich. J.	ethanol 96%	ZFMKTIS2517097
ZFMK-TIS-2517098	Araneae	Linyphiidae	Diplostyla concolor	female	adult	Germany	Nordrhein-Westfalen	Bonn	7.12	50.67	16.9.2012	Huber. B.A.	Wunderlich. J.	ethanol 96%	ZFMKTIS2517098
ZFMK-TIS-2517099	Araneae	Linyphiidae	Diplocephalus picinus	female	adult	Germany	Nordrhein-Westfalen	Bonn	7.3	50.69	10.5.2012	Huber. B.A. et al.	Wunderlich. J.	ethanol 96%	ZFMKTIS2517099
ZFMK-TIS-2517344	Araneae	Linyphiidae	Diplocephalus picinus	female	adult	Germany	Rheinland-Pfalz	Niederzissen	7.22	50.47	20.5.2014	Krammer. H.-J.; Walbaum. W.	Krammer. H.-J.	ethanol 96%	ZFMKTIS2517344
ZFMK-TIS-2517345	Araneae	Linyphiidae	Microneta viaria	female	adult	Germany	Rheinland-Pfalz	Niederzissen	7.22	50.47	20.5.2014	Krammer. H.-J.; Walbaum. W.	Krammer. H.-J.	ethanol 96%	ZFMKTIS2517345
ZFMK-TIS-2517350	Araneae	Linyphiidae	Tenuiphantes flavipes	male	adult	Germany	Rheinland-Pfalz	Niederzissen	7.22	50.47	20.5.2014	Krammer. H.-J.; Walbaum. W.	Huber. B.A.	ethanol 96%	ZFMKTIS2517350
ZFMK-TIS-2517352	Araneae	Araneidae	Araniella opisthographa	male	adult	Germany	Rheinland-Pfalz	Niederzissen	7.22	50.47	20.5.2014	Krammer. H.-J.; Walbaum. W.	Krammer. H.-J.	ethanol 96%	ZFMKTIS2517352
[truncated: 1,538 more rows]
