# Supplementary material for: Towards a DNA Barcode Reference Database for Spiders and Harvestmen of Germany
Source: PLoS One. 2016 Sep 28;11(9):e0162624. doi: 10.1371/journal.pone.0162624 (PMC5040438; doi:10.1371/journal.pone.0162624)
Supplement: S2 Table — Statistics, individual by species, for three types of distance comparisons (intraspecific, closest interspecific, largest congeneric): minimal, maximal, mean and median intraspecific genetic distances; closest species (by distance) and minimal, maximal and median distance separating the two species; genetically most distant species within the same genus along with maximal distance in separating the two species. In case of identical distances to reference species, two or more rows under the same species name are used for listing all these cases–one line for each allogeneric comparison (note: the DiStats script used to compute these values considers the full number of decimal places during comparison/sorting of distances, even if output is set to contain only 2 decimal places, as in DiStats default mode). (XLSX) [file pone.0162624.s008.xlsx]

## Sheet: Araneae_Appendix_S2
Taxon	#_of_intrasp_distances	Intrasp_dist_Mean	Intrasp_dist_Min	Intrasp_dist_Median	Intrasp_dist_Max	Closest_Sp	Closest_Sp_Min_Dist	Closest_Sp_Max_Dist	Closest_Sp_Dist_Median	#_distances_to_Closest_Sp	most_distant_congener	most_distant_congener_Max_Dist
Abacoproeces saltuum	2	1.07	1.07	1.07	1.07	Dicymbium tibiale	14.24	14.4	14.32	4
Acantholycosa lignaria	0					Pardosa blanda	4.59	5.51	5.05	2
Acantholycosa lignaria	0					Pardosa paludicola	4.59	4.59	4.59	2
Aculepeira ceropegia	132	0.39	0	0.38	0.77	Larinioides cornutus	10.11	10.87	10.57	180
Aelurillus v-insignitus	182	2.13	0	0.92	10.11	Sitticus floricola	10.41	12.86	11.79	42
Agalenatea redii	90	0.54	0	0.67	1	Aculepeira ceropegia	11.34	12.69	12.25	120
Agelena labyrinthica	42	0.88	0	1.38	1.68	Allagelena gracilens	8.73	9.65	9.34	63
Agroeca brunnea	42	0.26	0	0.31	0.61	Agroeca proxima	8.12	8.58	8.27	35	Agroeca proxima	8.58
Agroeca proxima	20	0.25	0	0.31	0.61	Agroeca brunnea	8.12	8.58	8.27	35	Agroeca brunnea	8.58
Agyneta affinis	42	0.4	0	0.17	0.92	Agyneta rurestris	8.74	9.65	9.34	126	Agyneta ressli	10.87
Agyneta innotabilis	12	0	0	0	0	Agyneta rurestris	9.34	9.8	9.49	72	Agyneta mollis	11.33
Agyneta mollis	6	0	0	0	0	Agyneta affinis	9.24	9.95	9.8	21	Agyneta innotabilis	11.33
Agyneta ressli	0					Agyneta rurestris	1.99	2.76	2.45	18	Agyneta innotabilis	11.03
Agyneta rurestris	306	0.53	0	0.31	1.68	Agyneta ressli	1.99	2.76	2.45	18	Agyneta mollis	9.8
Allagelena gracilens	72	0.5	0	0.5	0.92	Agelena labyrinthica	8.73	9.65	9.34	63
Allomengea vidua	0					Walckenaeria acuminata	11.03	11.49	11.18	6
Alopecosa barbipes	0					Alopecosa taeniata	5.97	6.13	5.97	3	Alopecosa fabrilis	7.96
Alopecosa cuneata	110	1	0	1.07	1.84	Alopecosa pulverulenta	0.15	2.14	1.23	187	Alopecosa striatipes	7.96
Alopecosa cursor	2	0	0	0	0	Alopecosa pulverulenta	5.21	6.43	5.82	34	Alopecosa fabrilis	8.42
Alopecosa fabrilis	6	1.02	0.77	0.92	1.38	Alopecosa striatipes	3.22	3.98	3.83	9	Alopecosa sulzeri	8.73
Alopecosa pulverulenta	272	0.6	0	0.61	1.68	Alopecosa cuneata	0.15	2.14	1.23	187	Alopecosa striatipes	8.27
Alopecosa schmidti	0					Alopecosa fabrilis	3.83	4.29	3.98	3	Alopecosa sulzeri	8.27
Alopecosa striatipes	6	0.1	0	0.15	0.15	Alopecosa fabrilis	3.22	3.98	3.83	9	Alopecosa pulverulenta	8.27
Alopecosa sulzeri	0					Alopecosa cuneata	6.58	7.35	7.2	11	Alopecosa fabrilis	8.73
Alopecosa taeniata	6	0.2	0.15	0.15	0.31	Alopecosa trabalis	3.12	3.52	3.33	6	Alopecosa striatipes	7.5
Alopecosa trabalis	2	0	0	0	0	Alopecosa pulverulenta	0.77	1.99	1.23	34	Alopecosa striatipes	7.73
Amaurobius fenestralis	156	0.07	0	0	0.31	Amaurobius similis	6.43	6.74	6.58	65	Amaurobius ferox	10.11
Amaurobius ferox	30	0.74	0	1.23	1.23	Amaurobius similis	9.34	9.8	9.57	30	Amaurobius fenestralis	10.11
Amaurobius similis	20	0.06	0	0	0.15	Amaurobius fenestralis	6.43	6.74	6.58	65	Amaurobius ferox	9.8
Anelosimus vittatus	56	0.15	0	0.15	0.31	Dipoena braccata	14.68	15.62	15.05	16
Anguliphantes angulipalpis	2	2.1	2.1	2.1	2.1	Lepthyphantes nodifer	8.12	9.47	8.81	6	Anguliphantes monticola	10.52
Anguliphantes monticola	0					Palliduphantes antroniensis	6.28	6.28	6.28	1	Anguliphantes angulipalpis	10.52
Antistea elegans	30	0.13	0	0.15	0.31	Lathys stigmatisata	11.64	12.86	12.25	12
Anyphaena accentuata	110	0.64	0	0.61	2.3	Cryptachaea riparia	10.41	11.33	10.57	11
Apostenus fuscus	56	0.2	0	0.15	0.61	Clubiona stagnatilis	10.57	11.18	10.86	24
Araeoncus anguineus	0					Araeoncus crassiceps	3.68	4.13	4.13	3	Araeoncus humilis	13.32
Araeoncus crassiceps	6	1.12	0	1.68	1.68	Araeoncus anguineus	3.68	4.13	4.13	3	Araeoncus humilis	12.86
Araeoncus humilis	30	0.31	0	0	0.92	Ceratinella brevipes	11.18	11.64	11.33	24	Araeoncus anguineus	13.32
Araneus alsine	2	1.99	1.99	1.99	1.99	Nuctenea umbratica	10.56	11.33	10.87	36	Araneus sturmi	15.76
Araneus angulatus	6	0.1	0	0.15	0.15	Aculepeira ceropegia	11.64	12.4	12.17	36	Araneus sturmi	18.06
Araneus diadematus	272	0.2	0	0.15	0.77	Gibbaranea gibbosa	11.33	12.56	11.5	85	Araneus sturmi	16.75
Araneus marmoreus	2	1.07	1.07	1.07	1.07	Araneus quadratus	10.17	11.31	10.64	60	Araneus sturmi	19.05
Araneus quadratus	870	0.42	0	0.46	1.83	Araneus marmoreus	10.17	11.31	10.64	60	Araneus sturmi	17.97
Araneus sturmi	72	0.33	0	0.32	0.82	Araneus triguttatus	11.33	12.15	11.79	36	Araneus marmoreus	19.05
Araneus triguttatus	12	0.31	0.15	0.31	0.46	Araneus sturmi	11.33	12.15	11.79	36	Araneus angulatus	14.7
Araniella alpica	2	0	0	0	0	Araniella opisthographa	11.33	11.94	11.79	18	Araniella displicata	12.86
Araniella cucurbitina	420	0.44	0	0.15	1.38	Araniella opisthographa	7.66	9.19	8.73	189	Araniella alpica	12.71
Araniella displicata	0					Araniella cucurbitina	10.72	11.18	11.03	21	Araniella alpica	12.86
Araniella opisthographa	72	0.71	0	0.77	1.53	Araniella cucurbitina	7.66	9.19	8.73	189	Araniella alpica	11.94
Archaeodictyna ammophila	0					Nigma flavescens	11.03	11.33	11.18	9
Arctosa alpigena	2	0.92	0.92	0.92	0.92	Arctosa lutetiana	9.19	9.34	9.26	2	Arctosa cinerea	14.09
Arctosa cinerea	6	0	0	0	0	Arctosa perita	9.19	9.19	9.19	3	Arctosa alpigena	14.09
Arctosa leopardus	12	0	0	0	0	Dolomedes fimbriatus	9.04	9.49	9.19	44	Arctosa cinerea	13.94
Arctosa lutetiana	0					Arctosa alpigena	9.19	9.34	9.26	2	Arctosa cinerea	13.94
Arctosa perita	0					Arctosa cinerea	9.19	9.19	9.19	3	Arctosa leopardus	12.1
Argiope bruennichi	420	0.29	0	0.16	1.82	Aculepeira ceropegia	10.7	13.2	11.64	252
Asagena phalerata	272	1.97	0	2.6	3.37	Crustulina sticta	11.33	12.4	12.1	34
Asianellus festivus	0					Aelurillus v-insignitus	11.03	13.48	12.71	14
Asthenargus helveticus	2	0	0	0	0	Mermessus trilobatus	12.02	12.71	12.56	10
Atypus affinis	0					Atypus piceus	14.7	14.85	14.7	3	Atypus piceus	14.85
Atypus piceus	6	0.31	0.15	0.31	0.46	Atypus affinis	14.7	14.85	14.7	3	Atypus affinis	14.85
Aulonia albimana	156	0.14	0	0	0.46	Xerolycosa miniata	11.03	12.4	11.33	169
Ballus chalybeius	20	0.12	0	0.15	0.31	Talavera aequipes	13.63	13.78	13.63	5
Baryphyma pratense	2	0.46	0.46	0.46	0.46	Metopobactrus prominulus	11.33	12.25	11.79	6	Baryphyma trifrons	12.25
Baryphyma trifrons	0					Dicymbium tibiale	11.64	11.94	11.79	2	Baryphyma pratense	12.25
Bathyphantes approximatus	20	0	0	0	0	Bathyphantes gracilis	10.11	10.87	10.26	60	Bathyphantes nigrinus	13.48
Bathyphantes gracilis	132	0.24	0	0.15	0.92	Bathyphantes similis	4.75	5.51	4.9	12	Bathyphantes nigrinus	13.48
Bathyphantes nigrinus	110	1.09	0	1.53	2.14	Bathyphantes similis	11.64	12.4	12.4	11	Bathyphantes approximatus	13.48
Bathyphantes parvulus	2	0.31	0.31	0.31	0.31	Bathyphantes gracilis	9.49	10.41	9.8	24	Bathyphantes nigrinus	12.71
Bathyphantes similis	0					Bathyphantes gracilis	4.75	5.51	4.9	12	Bathyphantes nigrinus	12.4
Berlandina cinerea	2	0.77	0.77	0.77	0.77	Gnaphosa nigerrima	11.49	12.1	11.79	2
Bolyphantes alticeps	20	0.55	0	0	1.38	Mughiphantes pulcher	11.18	11.94	11.79	15
Callilepis nocturna	2	0	0	0	0	Callilepis schuszteri	9.34	9.34	9.34	2	Callilepis schuszteri	9.34
Callilepis schuszteri	0					Callilepis nocturna	9.34	9.34	9.34	2	Callilepis nocturna	9.34
Callobius claustrarius	2	0	0	0	0	Amaurobius similis	11.33	11.49	11.49	10
Caracladus avicula	2	0.46	0.46	0.46	0.46	Silometopus incurvatus	10.57	10.72	10.64	2
Centromerita bicolor	20	0.25	0	0.23	0.46	Centromerus incilium	9.04	10	9.49	15
Centromerus arcanus	6	0.93	0.46	1.16	1.16	Centromerus semiater	8.11	8.67	8.36	6	Centromerus silvicola	12.71
Centromerus dilutus	2	1.65	1.65	1.65	1.65	Centromerus semiater	9.3	9.83	9.66	4	Centromerus sylvaticus	13.55
Centromerus incilium	6	0.43	0	0.61	0.67	Centromerus pabulator	6.43	9	7.5	6	Centromerus serratus	12.5
Centromerus pabulator	2	4.44	4.44	4.44	4.44	Centromerus incilium	6.43	9	7.5	6	Centromerus sylvaticus	13.26
Centromerus semiater	2	0	0	0	0	Centromerus arcanus	8.11	8.67	8.36	6	Centromerus silvicola	11.74
Centromerus serratus	0					Centromerus semiater	10.83	10.88	10.86	2	Centromerus sylvaticus	13.58
Centromerus silvicola	0					Centromerus incilium	10.5	10.72	10.57	3	Centromerus pabulator	12.86
Centromerus sylvaticus	110	0.71	0	0.92	1.47	Centromerus incilium	7.96	9	8.5	33	Centromerus serratus	13.58
Ceratinella brevipes	12	0.08	0	0.08	0.15	Ceratinella scabrosa	7.04	7.35	7.12	12	Ceratinella brevis	9.65
Ceratinella brevis	56	0.81	0	0.77	2.3	Ceratinella brevipes	8.73	9.65	8.88	32	Ceratinella scabrosa	12.25
Ceratinella scabrosa	6	1.02	0	1.53	1.53	Ceratinella brevipes	7.04	7.35	7.12	12	Ceratinella brevis	12.25
Cercidia prominens	110	0.22	0	0	1.23	Hypsosinga sanguinea	10.26	11.03	10.41	55
Cetonana laticeps	2	0	0	0	0	Haplodrassus signifer	11.94	13.02	12.33	20
Cheiracanthium erraticum	30	1.23	0	2.3	2.3	Cheiracanthium mildei	7.96	8.73	8.19	12	Cheiracanthium punctorium	9.65
Cheiracanthium mildei	2	1.99	1.99	1.99	1.99	Cheiracanthium erraticum	7.96	8.73	8.19	12	Cheiracanthium punctorium	11.49
Cheiracanthium punctorium	20	0.12	0	0	0.32	Cheiracanthium erraticum	8.81	9.65	9.49	30	Cheiracanthium mildei	11.49
Cicurina cicur	30	0.05	0	0	0.15	Cryphoeca silvicola	11.33	11.64	11.56	48
Clubiona brevipes	20	0.06	0	0	0.15	Clubiona comta	8.88	9.19	8.88	35	Clubiona corticalis	13.48
Clubiona caerulescens	0					Clubiona reclusa	6.13	7.2	7.04	11	Clubiona genevensis	15.44
Clubiona comta	42	0.09	0	0	0.31	Clubiona brevipes	8.88	9.19	8.88	35	Clubiona corticalis	13.63
Clubiona corticalis	12	3.37	0	3.37	6.74	Clubiona leucaspis	10.72	11.79	10.8	8	Clubiona subtilis	15.01
Clubiona diversa	20	0.98	0.15	0.31	2.14	Clubiona stagnatilis	9.19	10.57	9.89	15	Clubiona corticalis	14.7
Clubiona frisia	0					Clubiona frutetorum	5.36	5.83	5.57	5	Clubiona genevensis	15.44
Clubiona frutetorum	20	0.62	0	0.92	1.07	Clubiona lutescens	5.22	6.29	5.82	35	Clubiona genevensis	14
Clubiona genevensis	2	0.54	0.54	0.54	0.54	Clubiona leucaspis	8.58	9.87	9.23	4	Clubiona frisia	15.44
Clubiona leucaspis	2	0	0	0	0	Clubiona genevensis	8.58	9.87	9.23	4	Clubiona terrestris	13.79
Clubiona lutescens	42	0.22	0	0.15	0.46	Clubiona stagnatilis	4.7	5.51	5.21	21	Clubiona genevensis	14.36
Clubiona neglecta	6	0	0	0	0	Clubiona lutescens	5.82	5.97	5.82	21	Clubiona corticalis	14.4
Clubiona pallidula	72	0.31	0	0.31	0.61	Clubiona caerulescens	7.04	7.66	7.35	9	Clubiona corticalis	14.4
Clubiona phragmitis	56	1.14	0	1.84	2.3	Clubiona stagnatilis	5.83	7.35	6.46	24	Clubiona genevensis	14.36
Clubiona reclusa	110	0.88	0	1.38	1.68	Clubiona subsultans	4.44	5.36	5.05	33	Clubiona genevensis	14
Clubiona stagnatilis	6	0.74	0.49	0.81	0.92	Clubiona lutescens	4.7	5.51	5.21	21	Clubiona corticalis	13.94
Clubiona subsultans	6	0.71	0.15	0.92	1.07	Clubiona reclusa	4.44	5.36	5.05	33	Clubiona genevensis	14
Clubiona subtilis	20	0	0	0	0	Clubiona stagnatilis	8.58	8.75	8.73	15	Clubiona corticalis	15.01
Clubiona terrestris	156	0.14	0	0	0.77	Clubiona lutescens	6.13	6.58	6.28	91	Clubiona corticalis	14.78
Clubiona trivialis	12	0.54	0	0.54	1.07	Clubiona lutescens	9.34	9.8	9.34	28	Clubiona corticalis	13.17
Clubiona trivialis	12	0.54	0	0.54	1.07	Clubiona phragmitis	9.34	9.8	9.57	32	Clubiona corticalis	13.17
Clubiona trivialis	12	0.54	0	0.54	1.07	Clubiona stagnatilis	9.34	9.89	9.45	12	Clubiona corticalis	13.17
Cnephalocotes obscurus	20	2.36	0.46	1.91	4.44	Walckenaeria dysderoides	11.49	13.76	12.25	45
Coelotes atropos	0					Coelotes terrestris	4.75	5.05	4.75	29	Coelotes terrestris	5.05
Coelotes terrestris	812	0.1	0	0	0.77	Coelotes atropos	4.75	5.05	4.75	29	Coelotes atropos	5.05
Coleosoma floridanum	0					Ohlertidion ohlerti	9.86	9.86	9.86	1
Coriarachne depressa	6	1.02	0.92	1.07	1.07	Xysticus kochi	10.72	12.25	11.18	51
Coriarachne depressa	6	1.02	0.92	1.07	1.07	Xysticus sabulosus	10.72	11.33	11.18	3
Crustulina guttata	12	0.47	0.33	0.47	0.61	Crustulina sticta	10.11	10.86	10.72	8	Crustulina sticta	10.86
Crustulina sticta	2	0	0	0	0	Crustulina guttata	10.11	10.86	10.72	8	Crustulina guttata	10.86
Cryphoeca silvicola	56	0.12	0	0.15	0.32	Cicurina cicur	11.33	11.64	11.56	48
Cryptachaea riparia	0					Parasteatoda tepidariorum	6.28	7.04	6.89	19
Cybaeus tetricus	6	0	0	0	0	Amaurobius fenestralis	11.18	11.49	11.33	39
Cyclosa conica	56	1.6	0	0.85	3.37	Nuctenea umbratica	12.71	13.63	13.02	144	Cyclosa oculata	15.16
Cyclosa oculata	2	2.45	2.45	2.45	2.45	Aculepeira ceropegia	13.02	14.34	13.55	24	Cyclosa conica	15.16
Dendryphantes rudis	56	0.86	0	0.61	2.14	Macaroeris nidicolens	10.72	12.25	11.79	40
Diaea dorsata	72	0.07	0	0	0.31	Xysticus sabulosus	11.49	11.79	11.49	9
Dictyna arundinacea	20	1.81	0.92	1.76	3.22	Dictyna uncinata	7.2	8.73	7.81	55	Dictyna civica	14.4
Dictyna civica	12	0.1	0	0.15	0.15	Dictyna latens	11.94	12.1	12.02	4	Dictyna pusilla	14.4
Dictyna latens	0					Lathys stigmatisata	11.49	12.1	11.79	2	Dictyna pusilla	14.09
Dictyna latens	0					Nigma walckenaeri	11.49	12.56	12.02	2	Dictyna pusilla	14.09
Dictyna pusilla	2	0.15	0.15	0.15	0.15	Dictyna uncinata	7.81	8.73	8.04	22	Dictyna civica	14.4
Dictyna uncinata	110	0.89	0	0.92	1.38	Dictyna arundinacea	7.2	8.73	7.81	55	Dictyna civica	13.78
Dicymbium nigrum	20	1.36	0.15	1.03	2.81	Dicymbium tibiale	3.06	4.04	3.47	10	Dicymbium tibiale	4.04
Dicymbium tibiale	2	0.31	0.31	0.31	0.31	Dicymbium nigrum	3.06	4.04	3.47	10	Dicymbium nigrum	4.04
Diplocephalus cristatus	42	0.18	0	0.15	0.46	Dicymbium nigrum	9.19	10.56	10.11	35	Diplocephalus picinus	14.4
Diplocephalus helleri	0					Diplocephalus cristatus	10.26	10.57	10.41	7	Diplocephalus picinus	13.32
Diplocephalus latifrons	90	2.24	0	1.29	4.84	Dicymbium nigrum	9.43	11.75	10.35	50	Diplocephalus picinus	13.87
Diplocephalus picinus	156	0.05	0	0	0.31	Dicymbium tibiale	10.41	11.03	10.72	26	Diplocephalus cristatus	14.4
Diplostyla concolor	380	0.71	0	0.77	1.38	Porrhomma convexum	11.49	12.56	12.25	160
Dipoena braccata	2	0.16	0.16	0.16	0.16	Lasaeola tristis	8.67	9.65	9.22	10	Dipoena melanogaster	12.4
Dipoena melanogaster	56	0.08	0	0	0.31	Lasaeola tristis	10.87	12.27	10.95	40	Dipoena braccata	12.4
Dismodicus bifrons	20	0.34	0.15	0.31	0.61	Hypomma bituberculatum	10.26	11.33	11.03	35
Dolomedes fimbriatus	110	0.35	0	0.31	0.77	Dolomedes plantarius	3.37	4.29	3.83	22	Dolomedes plantarius	4.29
Dolomedes plantarius	2	1.23	1.23	1.23	1.23	Dolomedes fimbriatus	3.37	4.29	3.83	22	Dolomedes fimbriatus	4.29
Donacochara speciosa	0					Micrargus herbigradus	13.48	14.09	13.94	15
Drapetisca socialis	6	0.31	0.15	0.31	0.46	Bolyphantes alticeps	11.64	12.25	12.1	15
Drassodes cupreus	6	1.94	0.15	2.76	2.91	Drassodes lapidosus	7.04	8.27	7.81	36	Drassodes pubescens	12.1
Drassodes lapidosus	132	2.24	0	1.99	4.59	Drassodes cupreus	7.04	8.27	7.81	36	Drassodes pubescens	10.87
Drassodes pubescens	12	0.69	0	0.69	1.38	Drassodes lapidosus	9.95	10.87	10.41	48	Drassodes cupreus	12.1
Drassyllus lutetianus	12	0.48	0	0.61	0.77	Drassyllus pusillus	6.13	6.74	6.51	24	Drassyllus praeficus	8.88
Drassyllus praeficus	20	0.09	0	0.15	0.15	Drassyllus lutetianus	8.12	8.88	8.58	20	Drassyllus pusillus	9.04
Drassyllus pumilus	6	0	0	0	0	Drassyllus lutetianus	6.43	7.04	6.81	12	Drassyllus praeficus	8.42
Drassyllus pumilus	6	0	0	0	0	Drassyllus pusillus	6.43	6.58	6.43	18	Drassyllus praeficus	8.42
Drassyllus pusillus	30	0.57	0	1.07	1.07	Drassyllus lutetianus	6.13	6.74	6.51	24	Drassyllus praeficus	9.04
Dysdera crocata	2	3.37	3.37	3.37	3.37	Dysdera ninnii	17	18.21	17.58	4	Dysdera ninnii	18.21
Dysdera erythrina	20	0	0	0	0	Dysdera crocata	17.3	17.61	17.46	10	Dysdera ninnii	18.53
Dysdera ninnii	2	0	0	0	0	Pellenes nigrociliatus	16.85	17.25	17.05	4	Dysdera erythrina	18.53
Ebrechtella tricuspidata	42	0.53	0	0.16	1.91	Thomisus onustus	10.87	12.24	11.03	49
Enoplognatha latimana	42	0.48	0	0.46	0.92	Enoplognatha ovata	0	1.49	0.46	126	Enoplognatha thoracica	12.25
Enoplognatha ovata	306	0.45	0	0.36	1.66	Enoplognatha latimana	0	1.49	0.46	126	Enoplognatha thoracica	13.25
Enoplognatha thoracica	42	0.6	0	0.46	1.38	Dipoena melanogaster	11.18	12.75	11.59	56	Enoplognatha ovata	13.25
Entelecara acuminata	72	0.1	0	0.15	0.31	Entelecara congenera	8.58	9.19	8.88	27	Entelecara congenera	9.19
Entelecara congenera	6	0.2	0.15	0.15	0.31	Entelecara acuminata	8.58	9.19	8.88	27	Entelecara acuminata	9.19
Episinus angulatus	90	0.09	0	0.15	0.15	Episinus truncatus	7.04	7.21	7.13	20	Episinus truncatus	7.21
Episinus truncatus	2	0	0	0	0	Episinus angulatus	7.04	7.21	7.13	20	Episinus angulatus	7.21
Eratigena agrestis	12	0.97	0	0.92	1.97	Eratigena atrica	7.4	9.04	8.12	60	Eratigena atrica	9.04
Eratigena atrica	210	0.47	0	0	1.38	Eratigena agrestis	7.4	9.04	8.12	60	Eratigena agrestis	9.04
Eresus kollari	20	2.57	0	0.15	6.43	Eresus moravicus	4.9	6.89	6.74	5	Eresus moravicus	6.89
Eresus moravicus	0					Eresus kollari	4.9	6.89	6.74	5	Eresus kollari	6.89
Erigone arctica	0					Erigone atra	2.76	2.76	2.76	2	Erigone cristatopalpus	7.35
Erigone atra	2	0	0	0	0	Erigone dentipalpis	2.45	2.45	2.45	2	Erigone cristatopalpus	7.2
Erigone cristatopalpus	0					Erigone longipalpis	5.51	5.67	5.59	2	Erigone arctica	7.35
Erigone dentipalpis	0					Erigone atra	2.45	2.45	2.45	2	Erigone cristatopalpus	7.04
Erigone longipalpis	2	0.15	0.15	0.15	0.15	Erigone cristatopalpus	5.51	5.67	5.59	2	Erigone dentipalpis	6.43
Erigonella hiemalis	42	0.04	0	0	0.15	Dicymbium nigrum	10.18	10.72	10.57	35
Erigonoplus globipes	0					Mermessus trilobatus	11.24	11.94	11.79	5
Ero aphana	56	0.74	0	0.92	1.23	Bathyphantes similis	14.24	14.7	14.55	8	Ero furcata	17.46
Ero cambridgei	2	0.18	0.18	0.18	0.18	Ero furcata	11.79	12.56	12.05	8	Ero aphana	16.32
Ero furcata	12	1.41	0	1.46	2.6	Ero cambridgei	11.79	12.56	12.05	8	Ero aphana	17.46
Euophrys frontalis	240	1.47	0	0.46	3.52	Sitticus terebratus	11.79	13.2	13.02	16
Euryopis flavomaculata	30	0.98	0	1.07	1.53	Dipoena melanogaster	11.26	12.4	12.1	48	Euryopis quinqueguttata	12.71
Euryopis quinqueguttata	6	0	0	0	0	Dipoena braccata	11.65	12.25	11.95	6	Euryopis flavomaculata	12.71
Evansia merens	0					Walckenaeria cuspidata	11.45	11.79	11.64	7
Evarcha arcuata	462	0.94	0	0.77	2.39	Evarcha laetabunda	7.89	10.62	9.12	88	Evarcha laetabunda	10.62
Evarcha falcata	420	1.19	0	0.92	3.37	Evarcha laetabunda	6.28	7.5	6.76	84	Evarcha arcuata	10.11
Evarcha laetabunda	12	0.5	0	0.48	0.97	Evarcha falcata	6.28	7.5	6.76	84	Evarcha arcuata	10.62
Filistata insidiatrix	0					Salticus scenicus	20.06	20.37	20.06	7
Floronia bucculenta	132	0.39	0	0.15	1.07	Walckenaeria cuspidata	13.49	15.47	14.85	84
Frontinellina frutetorum	42	0.57	0	0.61	1.38	Neriene emphana	13.63	14.4	13.78	21
Gibbaranea bituberculata	12	0.38	0.15	0.38	0.61	Gibbaranea gibbosa	8.73	9.34	9.19	20	Gibbaranea gibbosa	9.34
Gibbaranea gibbosa	20	1.6	0	2.11	2.3	Gibbaranea bituberculata	8.73	9.34	9.19	20	Gibbaranea omoeda	9.49
Gibbaranea gibbosa	20	1.6	0	2.11	2.3	Gibbaranea omoeda	8.73	9.49	8.93	10	Gibbaranea omoeda	9.49
Gibbaranea omoeda	2	0	0	0	0	Gibbaranea gibbosa	8.73	9.49	8.93	10	Gibbaranea gibbosa	9.49
Glyphesis servulus	2	0.15	0.15	0.15	0.15	Minyriolus pusillus	10.87	11.94	11.49	22
Gnaphosa badia	0					Gnaphosa nigerrima	7.2	7.2	7.2	1	Gnaphosa lucifuga	13.17
Gnaphosa bicolor	0					Gnaphosa petrobia	7.96	8.12	7.96	3	Gnaphosa lucifuga	12.1
Gnaphosa lucifuga	20	0.34	0	0.46	0.61	Gnaphosa bicolor	11.64	12.1	11.79	5	Gnaphosa petrobia	13.78
Gnaphosa nigerrima	0					Gnaphosa badia	7.2	7.2	7.2	1	Gnaphosa lucifuga	11.79
Gnaphosa opaca	0					Gnaphosa nigerrima	8.52	8.52	8.52	1	Gnaphosa lucifuga	12.78
Gnaphosa petrobia	6	0.1	0	0.15	0.15	Gnaphosa bicolor	7.96	8.12	7.96	3	Gnaphosa lucifuga	13.78
Gnathonarium dentatum	20	0.74	0	0.92	1.1	Walckenaeria acuminata	10.41	11.5	10.72	30
Gonatium paradoxum	20	0.23	0	0.16	0.61	Gonatium rubens	9.95	11.33	10.41	25	Gonatium rubellum	11.49
Gonatium rubellum	56	1.19	0	1.07	2.14	Gonatium rubens	3.37	5.36	4.36	40	Gonatium paradoxum	11.49
Gonatium rubens	20	1.07	0	1.3	1.84	Gonatium rubellum	3.37	5.36	4.36	40	Gonatium paradoxum	11.33
Gongylidiellum latebricola	110	0.42	0	0.31	1.07	Gongylidiellum murcidum	10.41	11.18	10.72	33	Gongylidiellum vivum	11.33
Gongylidiellum murcidum	6	0.31	0	0.46	0.46	Gongylidiellum vivum	1.53	1.68	1.53	3	Gongylidiellum latebricola	11.18
Gongylidiellum vivum	0					Gongylidiellum murcidum	1.53	1.68	1.53	3	Gongylidiellum latebricola	11.33
Gongylidium rufipes	72	0.2	0	0.15	0.77	Oedothorax fuscus	12.01	12.86	12.4	27
Hahnia difficilis	2	0	0	0	0	Hahnia montana	7.41	8.58	8.58	10	Hahnia helveola	18.38
Hahnia helveola	12	0.31	0	0.46	0.46	Hahnia pusilla	14.03	15.16	14.78	32	Hahnia difficilis	18.38
Hahnia montana	20	0.42	0	0.56	0.77	Hahnia difficilis	7.41	8.58	8.58	10	Hahnia pusilla	16.85
Hahnia nava	30	2.63	0	4.59	4.9	Hahnia pusilla	11.72	12.86	12.71	48	Hahnia difficilis	17.76
Hahnia ononidum	12	0.08	0	0.08	0.15	Hahnia pusilla	12.38	13.17	13.02	32	Hahnia difficilis	17.15
Hahnia pusilla	56	0.58	0	0.15	2.15	Hahnia nava	11.72	12.86	12.71	48	Hahnia montana	16.85
Haplodrassus dalmatensis	132	1.22	0	0.15	3.06	Haplodrassus soerenseni	8.27	8.73	8.35	12	Haplodrassus silvestris	11.18
Haplodrassus signifer	90	2.16	0	2.76	3.37	Haplodrassus dalmatensis	8.73	10.39	9.85	120	Haplodrassus soerenseni	11.18
Haplodrassus silvestris	12	0	0	0	0	Haplodrassus signifer	9.8	10.87	10.37	40	Haplodrassus soerenseni	11.33
Haplodrassus soerenseni	0					Haplodrassus umbratilis	5.82	5.82	5.82	1	Haplodrassus silvestris	11.33
Haplodrassus umbratilis	0					Haplodrassus soerenseni	5.82	5.82	5.82	1	Haplodrassus silvestris	10.41
Harpactea lepida	2	0.77	0.77	0.77	0.77	Dysdera erythrina	17.61	17.92	17.76	10	Harpactea rubicunda	18.99
Harpactea rubicunda	6	0.71	0.15	0.92	1.07	Centromerus incilium	17.61	18.67	18.22	9	Harpactea lepida	18.99
Heliophanus auratus	6	0.76	0	1.13	1.13	Heliophanus dubius	5.35	6.16	5.67	9	Heliophanus flavipes	7.85
Heliophanus cupreus	240	0.26	0	0.31	0.77	Heliophanus dampfi	4.75	5.67	5.05	64	Heliophanus flavipes	9.97
Heliophanus dampfi	12	1.38	0.15	1.61	2.14	Heliophanus cupreus	4.75	5.67	5.05	64	Heliophanus flavipes	9.32
Heliophanus dubius	6	1.43	1.07	1.38	1.84	Heliophanus auratus	5.35	6.16	5.67	9	Heliophanus flavipes	7.72
Heliophanus flavipes	156	1.41	0	2.03	3.05	Heliophanus auratus	5.67	7.85	7.2	39	Heliophanus cupreus	9.97
Helophora insignis	20	0.49	0	0.46	0.92	Allomengea vidua	11.33	11.64	11.33	5
Heriaeus graminicola	0					Xysticus sabulosus	10.41	10.41	10.41	1
Heteropoda venatoria	2	0	0	0	0	Agelena labyrinthica	12.86	13.02	12.86	14
Heterotheridion nigrovariegatum	0					Ohlertidion ohlerti	7.96	7.96	7.96	1
Hilaira excisa	0					Oreoneta tatrica	10.57	11.18	10.87	2
Histopona torpida	90	0.03	0	0	0.15	Lathys stigmatisata	15.01	15.47	15.24	20
Holocnemus pluchei	0					Porrhomma oblitum	19.06	20.13	19.6	2
Hygrolycosa rubrofasciata	2	1.38	1.38	1.38	1.38	Xerolycosa miniata	9.34	9.95	9.65	26
Hylyphantes graminicola	2	0	0	0	0	Gnathonarium dentatum	12.1	12.56	12.25	10
Hylyphantes graminicola	2	0	0	0	0	Oedothorax gibbosus	12.1	12.71	12.56	18
Hypomma bituberculatum	42	0.55	0	0.46	1.07	Hypomma fulvum	1.23	1.53	1.38	21	Hypomma cornutum	3.37
Hypomma cornutum	90	0.4	0	0.32	1.23	Hypomma fulvum	1.91	2.76	2.06	30	Hypomma bituberculatum	3.37
Hypomma fulvum	6	0.31	0.15	0.31	0.46	Hypomma bituberculatum	1.23	1.53	1.38	21	Hypomma cornutum	2.76
Hypsosinga albovittata	6	3.88	0.31	5.51	5.82	Hypsosinga heri	10.87	12.86	11.26	6	Hypsosinga pygmaea	13.48
Hypsosinga albovittata	6	3.88	0.31	5.51	5.82	Hypsosinga sanguinea	10.87	11.75	11.33	15	Hypsosinga pygmaea	13.48
Hypsosinga heri	2	0.15	0.15	0.15	0.15	Hypsosinga sanguinea	9.34	9.84	9.49	10	Hypsosinga albovittata	12.86
Hypsosinga pygmaea	6	1.68	1.29	1.61	2.14	Hypsosinga sanguinea	8.42	9.36	8.88	15	Hypsosinga albovittata	13.48
Hypsosinga sanguinea	20	0.53	0	0.77	0.95	Hypsosinga pygmaea	8.42	9.36	8.88	15	Hypsosinga albovittata	11.75
Hyptiotes paradoxus	20	0.06	0	0	0.15	Rugathodes bellicosus	13.94	14.09	13.94	10
Improphantes nitidus	2	0.31	0.31	0.31	0.31	Lepthyphantes nodifer	8.42	8.88	8.65	6
Inermocoelotes inermis	182	0.56	0	0.15	3.06	Coelotes atropos	7.35	8.73	7.82	14
Kaestneria dorsalis	30	0	0	0	0	Bathyphantes gracilis	12.71	13.63	13.02	72	Kaestneria pullata	12.86
Kaestneria dorsalis	30	0	0	0	0	Kaestneria pullata	12.71	12.86	12.71	30	Kaestneria pullata	12.86
Kaestneria pullata	20	0.12	0	0.15	0.31	Bathyphantes gracilis	10.57	11.49	10.87	60	Kaestneria dorsalis	12.86
Labulla thoracica	12	0.36	0	0.31	0.61	Neriene peltata	13.63	14.21	13.78	32
Labulla thoracica	12	0.36	0	0.31	0.61	Porrhomma convexum	13.63	13.94	13.78	32
Labulla thoracica	12	0.36	0	0.31	0.61	Porrhomma pygmaeum	13.63	13.94	13.78	40
Larinioides cornutus	210	0.19	0	0	0.77	Larinioides patagiatus	5.21	6.13	5.82	150	Larinioides ixobolus	6.89
Larinioides ixobolus	6	0	0	0	0	Larinioides cornutus	6.58	6.89	6.74	45	Larinioides sclopetarius	8.73
Larinioides patagiatus	90	0.9	0	0.77	2.3	Larinioides cornutus	5.21	6.13	5.82	150	Larinioides ixobolus	8.12
Larinioides sclopetarius	12	0.36	0	0.46	0.46	Larinioides cornutus	6.13	6.89	6.58	60	Larinioides ixobolus	8.73
Lasaeola tristis	20	0.36	0	0.54	0.61	Dipoena braccata	8.67	9.65	9.22	10
Lathys humilis	90	0.47	0	0.31	1.23	Lathys stigmatisata	9.34	10.41	10.11	20	Lathys stigmatisata	10.41
Lathys stigmatisata	2	1.53	1.53	1.53	1.53	Lathys humilis	9.34	10.41	10.11	20	Lathys humilis	10.41
Lepthyphantes keyserlingi	0					Tenuiphantes mengei	11.79	12.56	12.25	7	Lepthyphantes minutus	14.75
Lepthyphantes leprosus	132	1.32	0	0.77	2.91	Lepthyphantes minutus	8.88	10.12	9.35	96	Lepthyphantes nodifer	15.8
Lepthyphantes minutus	56	1.77	0	2.76	3.42	Lepthyphantes leprosus	8.88	10.12	9.35	96	Lepthyphantes nodifer	16.39
Lepthyphantes nodifer	6	0.1	0	0.15	0.15	Anguliphantes angulipalpis	8.12	9.47	8.81	6	Lepthyphantes minutus	16.39
Leptorchestes berolinensis	0					Synageles hilarulus	10.7	11.03	10.86	2
Leptorhoptrum robustum	0					Oreoneta tatrica	10.72	11.18	10.95	2
Leptothrix hardyi	2	0	0	0	0	Walckenaeria acuminata	10.72	11.33	10.87	12
Leptothrix hardyi	2	0	0	0	0	Walckenaeria alticeps	10.72	11.18	10.72	26
Linyphia hortensis	240	0.06	0	0	0.46	Walckenaeria acuminata	11.18	12.1	11.64	96	Linyphia triangularis	13.63
Linyphia triangularis	702	0.64	0	0.17	3.14	Linyphia hortensis	12.4	13.63	12.71	432	Linyphia hortensis	13.63
Liocranoeca striata	0					Agroeca brunnea	10.72	10.87	10.87	7
Liocranum rupicola	6	0.2	0.15	0.15	0.31	Apostenus fuscus	12.25	12.71	12.48	24
Liocranum rupicola	6	0.2	0.15	0.15	0.31	Haplodrassus signifer	12.25	12.99	12.56	30
Lophomma punctatum	12	0.94	0.15	1.07	1.23	Trichopterna cito	9.34	10.11	9.63	12
Macaroeris nidicolens	20	1.29	0	1.84	1.99	Dendryphantes rudis	10.72	12.25	11.79	40
Macrargus carpenteri	2	0.65	0.65	0.65	0.65	Macrargus rufus	8.07	9.49	8.75	34	Macrargus rufus	9.49
Macrargus rufus	272	0.85	0	0.96	1.68	Macrargus carpenteri	8.07	9.49	8.75	34	Macrargus carpenteri	9.49
Mangora acalypha	420	2.02	0	2.45	4.75	Nuctenea umbratica	15.37	17.76	16.69	378
Mansuphantes mansuetus	2	0.31	0.31	0.31	0.31	Anguliphantes monticola	9.19	9.49	9.34	2
Maro minutus	0					Walckenaeria cuspidata	10.34	11.18	11.02	7
Marpissa muscosa	56	0.11	0	0.15	0.31	Dendryphantes rudis	11.33	12.4	12.02	64	Marpissa radiata	11.64
Marpissa muscosa	56	0.11	0	0.15	0.31	Marpissa radiata	11.33	11.64	11.49	16	Marpissa radiata	11.64
Marpissa radiata	2	0	0	0	0	Marpissa muscosa	11.33	11.64	11.49	16	Marpissa muscosa	11.64
Marpissa radiata	2	0	0	0	0	Sitticus floricola	11.33	11.49	11.33	6	Marpissa muscosa	11.64
Marpissa radiata	2	0	0	0	0	Sitticus zimmermanni	11.33	11.5	11.42	4	Marpissa muscosa	11.64
Maso sundevalli	240	0.92	0	0.46	2.3	Pocadicnemis pumila	11.49	12.56	11.64	64
Mecynargus foveatus	2	0.98	0.98	0.98	0.98	Trichopterna cito	12.11	12.86	12.45	6
Mermessus trilobatus	20	0.4	0	0.23	0.97	Erigone cristatopalpus	8.53	9.65	9.49	5
Meta bourneti	2	0	0	0	0	Meta menardi	13.17	13.48	13.17	32	Meta menardi	13.48
Meta menardi	240	0.22	0	0.15	0.77	Metellina mengei	13.08	14.12	13.52	432	Meta bourneti	13.48
Metellina mengei	702	0.35	0	0.31	2.21	Metellina segmentata	7.81	9.38	8.12	540	Metellina merianae	16.33
Metellina merianae	552	1.83	0	2.45	4.13	Metellina mengei	13.32	16.33	13.78	648	Metellina segmentata	16.42
Metellina segmentata	380	0.24	0	0.31	0.54	Metellina mengei	7.81	9.38	8.12	540	Metellina merianae	16.42
Metopobactrus prominulus	6	0.51	0	0.77	0.77	Walckenaeria acuminata	9.37	10.41	9.65	18
Micaria aenea	0					Micaria pulicaria	10.87	12.4	11.57	6	Micaria pulicaria	12.4
Micaria pulicaria	30	3.67	0	5.36	6	Micaria aenea	10.87	12.4	11.57	6	Micaria subopaca	14.24
Micaria subopaca	6	0.21	0	0.31	0.31	Micaria aenea	11.94	12.11	12.1	3	Micaria pulicaria	14.24
Micrargus apertus	0					Micrargus georgescuae	2.3	2.6	2.45	3	Micrargus subaequalis	13.32
Micrargus georgescuae	6	0.41	0.15	0.46	0.61	Micrargus apertus	2.3	2.6	2.45	3	Micrargus subaequalis	13.94
Micrargus herbigradus	210	0.63	0	0.31	1.68	Micrargus georgescuae	3.52	4.75	3.83	45	Micrargus subaequalis	14.09
Micrargus subaequalis	6	0.41	0.15	0.46	0.61	Walckenaeria cuspidata	10.74	11.45	11.03	21	Micrargus herbigradus	14.09
Microlinyphia impigra	6	0.31	0	0.46	0.46	Neriene peltata	11.57	11.94	11.87	24	Microlinyphia pusilla	15.16
Microlinyphia pusilla	132	0.5	0	0.31	1.71	Simitidion simile	12.27	13.63	12.71	48	Microlinyphia impigra	15.16
Micrommata virescens	30	1.3	0	1.23	2.3	Robertus neglectus	12.1	12.4	12.17	6
Microneta viaria	600	0.26	0	0.15	1.38	Allomengea vidua	11.79	12.86	11.94	25
Minicia marginella	0					Trichopterna cito	9.65	9.94	9.8	3
Minyriolus pusillus	110	0.61	0	0.61	1.23	Walckenaeria cuspidata	10.16	11.33	10.87	77
Misumena vatia	90	0.42	0	0	1.65	Pistius truncatus	7.96	9.56	7.96	40
Moebelia penicillata	6	1.08	0.51	1.23	1.52	Walckenaeria dysderoides	12.31	15.37	14.53	27
Mughiphantes mughi	2	0	0	0	0	Bolyphantes alticeps	11.33	11.64	11.64	10	Mughiphantes pulcher	12.1
Mughiphantes pulcher	6	1.02	0	1.53	1.53	Bolyphantes alticeps	11.18	11.94	11.79	15	Mughiphantes mughi	12.1
Myrmarachne formicaria	0					Sitticus floricola	9.34	9.49	9.34	3
Neon reticulatus	306	1.63	0	2.3	4.26	Neon valentulus	5.51	7.53	5.82	36	Neon valentulus	7.53
Neon valentulus	2	0.15	0.15	0.15	0.15	Neon reticulatus	5.51	7.53	5.82	36	Neon reticulatus	7.53
Neoscona adianta	90	0.4	0	0.31	1.07	Araneus triguttatus	11.49	12.4	11.94	40
Neoscona adianta	90	0.4	0	0.31	1.07	Neottiura suaveolens	11.49	12.4	12.1	30
Neottiura bimaculata	272	1.24	0	2.3	2.6	Neottiura suaveolens	9.49	10.41	10.11	51	Neottiura suaveolens	10.41
Neottiura suaveolens	6	0.2	0.15	0.15	0.31	Neottiura bimaculata	9.49	10.41	10.11	51	Neottiura bimaculata	10.41
Neriene clathrata	272	0.87	0	1.38	1.68	Neriene montana	8.58	9.95	8.73	85	Neriene emphana	15.31
Neriene emphana	6	0	0	0	0	Neriene peltata	12.4	12.71	12.64	24	Neriene clathrata	15.31
Neriene montana	20	0.09	0	0.15	0.15	Neriene clathrata	8.58	9.95	8.73	85	Neriene radiata	14.7
Neriene peltata	56	0.52	0	0.31	1.82	Microlinyphia impigra	11.57	11.94	11.87	24	Neriene radiata	14.55
Neriene radiata	210	0.53	0	0.31	1.23	Neriene peltata	12.4	14.55	13.32	120	Neriene clathrata	14.85
Neriene radiata	210	0.53	0	0.31	1.23	Trichopterna cito	12.4	13.3	12.71	45	Neriene clathrata	14.85
Nesticus cellulanus	600	0.08	0	0	0.31	Walckenaeria furcillata	13.94	14.7	14.32	50
Nigma flavescens	72	0.25	0	0.15	0.61	Archaeodictyna ammophila	11.03	11.33	11.18	9	Nigma walckenaeri	11.64
Nigma walckenaeri	2	5.51	5.51	5.51	5.51	Nigma flavescens	11.33	11.64	11.49	18	Nigma flavescens	11.64
Nuctenea umbratica	306	0.49	0	0.77	1.07	Larinioides ixobolus	8.07	8.73	8.42	54
Nusoncus nasutus	2	0	0	0	0	Tapinocyba praecox	10.05	10.41	10.23	2
Obscuriphantes obscurus	6	0.92	0	1.38	1.38	Poeciloneta variegata	10.57	11.03	10.57	3
Oedothorax agrestis	0					Oedothorax fuscus	9.81	10.11	10.11	3	Oedothorax retusus	12.71
Oedothorax apicatus	72	0.26	0	0.31	0.61	Oedothorax retusus	3.22	4.29	3.52	99	Oedothorax fuscus	12.71
Oedothorax fuscus	6	0.11	0	0.17	0.17	Oedothorax agrestis	9.81	10.11	10.11	3	Oedothorax retusus	13.17
Oedothorax gibbosus	72	0.29	0	0.15	0.77	Oedothorax apicatus	10.11	10.72	10.41	81	Oedothorax agrestis	12.1
Oedothorax retusus	110	0.57	0	0.61	1.07	Oedothorax apicatus	3.22	4.29	3.52	99	Oedothorax fuscus	13.17
Ohlertidion ohlerti	0					Heterotheridion nigrovariegatum	7.96	7.96	7.96	1
Oreoneta tatrica	2	2.45	2.45	2.45	2.45	Hilaira excisa	10.57	11.18	10.87	2
Oreonetides glacialis	0					Walckenaeria dysderoides	9.9	11.04	10.71	9
Ostearius melanopygius	0					Walckenaeria cuspidata	9.8	10.16	10.11	7
Oxyopes heterophthalmus	0					Oxyopes ramosus	4.29	5.21	4.75	7	Oxyopes ramosus	5.21
Oxyopes ramosus	42	0.56	0	0.46	1.23	Oxyopes heterophthalmus	4.29	5.21	4.75	7	Oxyopes heterophthalmus	5.21
Ozyptila atomaria	6	0.51	0	0.77	0.77	Ozyptila praticola	8.27	9.45	8.88	45	Ozyptila simplex	10.81
Ozyptila brevipes	30	0.13	0	0.15	0.31	Ozyptila praticola	8.27	9.19	8.88	90	Ozyptila scabricula	10.57
Ozyptila claveata	12	0.48	0	0.61	0.77	Ozyptila praticola	8.14	9.34	8.88	60	Ozyptila simplex	10.81
Ozyptila praticola	210	0.73	0	0.92	1.47	Ozyptila trux	4.9	5.7	5.36	75	Ozyptila scabricula	9.8
Ozyptila scabricula	0					Ozyptila praticola	9.04	9.8	9.65	15	Ozyptila claveata	10.57
Ozyptila simplex	2	0.18	0.18	0.18	0.18	Ozyptila trux	4.14	4.59	4.32	10	Ozyptila atomaria	10.81
Ozyptila trux	20	1.04	0.15	1.07	1.68	Ozyptila simplex	4.14	4.59	4.32	10	Ozyptila scabricula	10.57
Pachygnatha clercki	72	1.41	0	1.53	2.45	Pachygnatha listeri	10.11	11.33	10.87	108	Pachygnatha degeeri	12.4
Pachygnatha degeeri	110	0.96	0	1.07	2.45	Pachygnatha listeri	7.5	8.58	7.81	132	Pachygnatha clercki	12.4
Pachygnatha listeri	132	0.71	0	0.77	1.38	Pachygnatha degeeri	7.5	8.58	7.81	132	Pachygnatha clercki	11.33
Paidiscura pallens	56	0.11	0	0	0.46	Ohlertidion ohlerti	13.32	13.48	13.32	8
Palliduphantes antroniensis	0					Anguliphantes monticola	6.28	6.28	6.28	1	Palliduphantes ericaeus	13.78
Palliduphantes ericaeus	0					Palliduphantes pallidus	10.87	11.65	11.26	8	Palliduphantes antroniensis	13.78
Palliduphantes montanus	0					Palliduphantes pallidus	1.99	3.23	2.37	8	Palliduphantes antroniensis	11.94
Palliduphantes pallidus	56	1.32	0.15	1.53	2.3	Palliduphantes montanus	1.99	3.23	2.37	8	Palliduphantes antroniensis	13.62
Panamomops mengei	0					Walckenaeria acuminata	10.75	11.03	11.03	6
Parasteatoda lunata	72	0.26	0	0.31	0.77	Cryptachaea riparia	7.04	7.35	7.04	9	Parasteatoda tepidariorum	9.8
Parasteatoda simulans	0					Parasteatoda tepidariorum	0.31	2.14	1.99	19	Parasteatoda lunata	9.19
Parasteatoda tabulata	2	0	0	0	0	Cryptachaea riparia	7.5	7.5	7.5	2	Parasteatoda tepidariorum	9.19
Parasteatoda tabulata	2	0	0	0	0	Parasteatoda lunata	7.5	7.81	7.5	18	Parasteatoda tepidariorum	9.19
Parasteatoda tepidariorum	342	1.2	0	1.23	2.14	Parasteatoda simulans	0.31	2.14	1.99	19	Parasteatoda lunata	9.8
Parazygiella montana	0					Zygiella atrica	13.32	13.32	13.32	1
Pardosa agrestis	72	0.52	0	0.63	0.92	Pardosa torrentum	0.15	0.61	0.46	9	Pardosa hortensis	7.5
Pardosa amentata	870	0.74	0	0.46	2.12	Pardosa lugubris	3.22	4.95	4.13	1440	Pardosa hortensis	7.95
Pardosa bifasciata	20	0.37	0	0.61	0.61	Pardosa prativaga	4.29	5.05	4.75	70	Pardosa giebeli	6.74
Pardosa bifasciata	20	0.37	0	0.61	0.61	Pardosa riparia	4.29	4.75	4.59	15	Pardosa giebeli	6.74
Pardosa blanda	2	1.23	1.23	1.23	1.23	Pardosa monticola	2.9	3.09	2.91	10	Pardosa hortensis	7.2
Pardosa giebeli	0					Pardosa nigra	4.59	4.75	4.67	2	Pardosa mixta	7.81
Pardosa hortensis	240	1.03	0	0.77	4.75	Pardosa lugubris	4.12	6.74	5.98	768	Pardosa pullata	8.85
Pardosa lugubris	2256	0.42	0	0.46	1.69	Pardosa saltans	0	1.53	0.46	240	Pardosa hortensis	6.74
Pardosa mixta	2	0.15	0.15	0.15	0.15	Pardosa monticola	3.06	3.48	3.22	10	Pardosa hortensis	8.27
Pardosa monticola	20	0.05	0	0	0.15	Pardosa agrestis	2.51	3.72	3.37	45	Pardosa hortensis	6.74
Pardosa monticola	20	0.05	0	0	0.15	Pardosa palustris	2.51	4.13	3.83	100	Pardosa hortensis	6.74
Pardosa monticola	20	0.05	0	0	0.15	Pardosa torrentum	2.51	3.06	2.91	5	Pardosa hortensis	6.74
Pardosa morosa	2	0.15	0.15	0.15	0.15	Pardosa nigriceps	4.13	4.29	4.21	2	Pardosa mixta	6.89
Pardosa nigra	2	0.15	0.15	0.15	0.15	Pardosa giebeli	4.59	4.75	4.67	2	Pardosa hortensis	8.12
Pardosa nigriceps	0					Pardosa morosa	4.13	4.29	4.21	2	Pardosa hortensis	7.96
Pardosa oreophila	6	0.51	0.31	0.46	0.77	Pardosa monticola	3.48	4.44	4.29	15	Pardosa hortensis	7.35
Pardosa paludicola	2	0	0	0	0	Pardosa lugubris	3.06	3.89	3.37	96	Pardosa pullata	6.16
Pardosa palustris	380	0.34	0	0.61	0.92	Pardosa agrestis	1.84	2.91	2.45	180	Pardosa hortensis	7.66
Pardosa prativaga	182	0.48	0	0.46	1.07	Pardosa riparia	0.15	0.92	0.61	42	Pardosa hortensis	7.04
Pardosa pullata	552	0.51	0	0.46	2.21	Pardosa riparia	1.07	3	1.84	72	Pardosa hortensis	8.85
Pardosa riparia	6	0.2	0.15	0.15	0.31	Pardosa prativaga	0.15	0.92	0.61	42	Pardosa hortensis	6.89
Pardosa saltans	20	0.4	0	0.46	0.61	Pardosa lugubris	0	1.53	0.46	240	Pardosa hortensis	6.58
Pardosa torrentum	0					Pardosa agrestis	0.15	0.61	0.46	9	Pardosa hortensis	6.89
Pardosa wagleri	2	0	0	0	0	Pardosa paludicola	5.05	5.05	5.05	4	Pardosa hortensis	7.66
Pelecopsis elongata	2	3.82	3.82	3.82	3.82	Metopobactrus prominulus	9.47	11.18	10.18	6	Pelecopsis parallela	13.29
Pelecopsis parallela	6	0	0	0	0	Trichopterna cito	10.57	10.72	10.58	9	Pelecopsis elongata	13.29
Pellenes nigrociliatus	2	0.61	0.61	0.61	0.61	Pellenes tripunctatus	11.03	11.33	11.18	14	Pellenes tripunctatus	11.33
Pellenes tripunctatus	42	0.85	0	1.23	1.53	Pellenes nigrociliatus	11.03	11.33	11.18	14	Pellenes nigrociliatus	11.33
Philaeus chrysops	2	0	0	0	0	Evarcha laetabunda	11.03	12.16	11.26	8
Philodromus albidus	42	0.18	0	0.31	0.31	Philodromus cespitum	7.66	9.04	8.73	77	Philodromus histrio	13.76
Philodromus albidus	42	0.18	0	0.31	0.31	Philodromus marmoratus	7.66	7.96	7.96	7	Philodromus histrio	13.76
Philodromus aureolus	342	0.59	0	0.31	2.91	Philodromus collinus	5.05	6.28	5.82	304	Philodromus histrio	14.93
Philodromus aureolus	342	0.59	0	0.31	2.91	Philodromus praedatus	5.05	5.82	5.51	38	Philodromus histrio	14.93
Philodromus buxi	0					Philodromus cespitum	5.21	5.83	5.83	11	Philodromus histrio	13.78
Philodromus cespitum	110	0.57	0	0	1.84	Philodromus praedatus	5.21	6.13	5.97	22	Philodromus histrio	14.06
Philodromus collinus	240	0.49	0	0.46	1.07	Philodromus aureolus	5.05	6.28	5.82	304	Philodromus histrio	14.22
Philodromus dispar	156	1.1	0	1.99	2.14	Philodromus cespitum	8.42	9.8	9.34	143	Philodromus histrio	14.22
Philodromus fuscomarginatus	0					Philodromus margaritatus	9.95	10.26	9.95	3	Philodromus histrio	14.68
Philodromus histrio	2	0	0	0	0	Philodromus cespitum	12.83	14.06	14.06	22	Philodromus aureolus	14.93
Philodromus margaritatus	6	0.2	0	0.31	0.31	Philodromus fuscomarginatus	9.95	10.26	9.95	3	Philodromus histrio	14.53
Philodromus marmoratus	0					Philodromus cespitum	5.36	5.97	5.82	11	Philodromus histrio	12.98
Philodromus praedatus	2	0	0	0	0	Philodromus aureolus	5.05	5.82	5.51	38	Philodromus histrio	13.76
Phlegra fasciata	30	1	0	0.77	2.3	Aelurillus v-insignitus	11.33	14.88	13.95	84
Pholcomma gibbum	30	0.28	0	0.31	0.68	Mermessus trilobatus	11.01	13.03	12.71	30
Pholcus alticeps	0					Pholcus phalangioides	17.3	17.3	17.3	1	Pholcus opilionoides	19.45
Pholcus opilionoides	20	0.06	0	0	0.15	Pholcus alticeps	19.3	19.45	19.3	5	Pholcus phalangioides	20.21
Pholcus phalangioides	0					Pholcus alticeps	17.3	17.3	17.3	1	Pholcus opilionoides	20.21
Phrurolithus festivus	56	0.29	0	0.17	0.92	Micaria pulicaria	13.86	15.89	15.31	48
Phylloneta impressa	156	0.53	0	0.61	1.67	Phylloneta sisyphia	6.28	7.42	6.43	130	Phylloneta sisyphia	7.42
Phylloneta sisyphia	90	0.21	0	0.15	0.46	Phylloneta impressa	6.28	7.42	6.43	130	Phylloneta impressa	7.42
Pimoa breuili	0					Mermessus trilobatus	13.37	15.62	15.47	5
Pirata piraticus	30	0.15	0	0.15	0.46	Pirata piscatorius	6.58	7.2	6.88	24	Pirata uliginosus	9.36
Pirata piscatorius	12	0.15	0	0.15	0.31	Pirata piraticus	6.58	7.2	6.88	24	Pirata uliginosus	8.9
Pirata uliginosus	72	0.26	0	0.46	0.46	Piratula hygrophila	5.82	6.29	6.13	99	Pirata piraticus	9.36
Piratula hygrophila	110	1.01	0	1.53	1.99	Pirata uliginosus	5.82	6.29	6.13	99	Piratula latitans	7.79
Piratula knorri	2	0	0	0	0	Piratula latitans	4.29	4.45	4.29	10	Piratula hygrophila	6.89
Piratula latitans	20	0.25	0	0.31	0.32	Piratula knorri	4.29	4.45	4.29	10	Piratula hygrophila	7.79
Pisaura mirabilis	600	0.77	0	0.77	1.99	Dolomedes fimbriatus	9.34	10.87	9.8	275
Pisaura mirabilis	600	0.77	0	0.77	1.99	Dolomedes plantarius	9.34	11.03	9.95	50
Pisaura mirabilis	600	0.77	0	0.77	1.99	Pardosa paludicola	9.34	10.26	9.65	50
Pisaura mirabilis	600	0.77	0	0.77	1.99	Xerolycosa miniata	9.34	10.87	9.95	325
Pistius truncatus	12	0.23	0	0.23	0.47	Misumena vatia	7.96	9.56	7.96	40
Pityohyphantes phrygianus	2	1.94	1.94	1.94	1.94	Bathyphantes gracilis	12.4	13.71	12.98	24
Platnickina tincta	240	0.36	0	0.31	1.07	Theridion pinastri	9.65	10.41	9.8	176
Pocadicnemis juncea	2	0	0	0	0	Pocadicnemis pumila	2.91	3.22	3.06	8	Pocadicnemis pumila	3.22
Pocadicnemis pumila	12	0.31	0.15	0.31	0.46	Pocadicnemis juncea	2.91	3.22	3.06	8	Pocadicnemis juncea	3.22
Poeciloneta variegata	0					Obscuriphantes obscurus	10.57	11.03	10.57	3
Porrhomma convexum	56	0.33	0	0	0.77	Porrhomma pygmaeum	2.3	2.91	2.76	80	Porrhomma oblitum	7.2
Porrhomma oblitum	2	0.16	0.16	0.16	0.16	Porrhomma convexum	6.86	7.2	7.04	16	Porrhomma pygmaeum	7.5
Porrhomma pygmaeum	90	0.11	0	0.15	0.31	Porrhomma convexum	2.3	2.91	2.76	80	Porrhomma oblitum	7.5
Pseudeuophrys erratica	30	0.4	0	0.32	0.92	Pseudeuophrys obsoleta	9.49	10.26	10.11	6	Pseudeuophrys lanigera	11.64
Pseudeuophrys lanigera	20	0.06	0	0	0.15	Pseudeuophrys erratica	11.18	11.64	11.49	30	Pseudeuophrys obsoleta	11.79
Pseudeuophrys obsoleta	0					Pseudeuophrys erratica	9.49	10.26	10.11	6	Pseudeuophrys lanigera	11.79
Pseudicius encarpatus	0					Salticus cingulatus	10.72	11.18	10.87	5
Psilochorus simoni	2	0	0	0	0	Metellina segmentata	20	22.04	21.71	40
Robertus arundineti	6	0	0	0	0	Robertus lividus	3.37	4.05	3.98	39	Robertus scoticus	7.2
Robertus lividus	156	0.79	0	0.46	3.56	Robertus arundineti	3.37	4.05	3.98	39	Robertus scoticus	9.34
Robertus neglectus	0					Robertus arundineti	5.36	5.36	5.36	3	Robertus lividus	7.35
Robertus scoticus	42	0.51	0	0.77	0.92	Robertus neglectus	6.58	6.74	6.58	7	Robertus lividus	9.34
Rugathodes bellicosus	2	0	0	0	0	Robertus neglectus	11.33	11.33	11.33	2
Saaristoa abnormis	56	0.86	0	1.38	1.53	Saaristoa firma	10.26	10.57	10.49	16	Saaristoa firma	10.57
Saaristoa firma	2	0	0	0	0	Saaristoa abnormis	10.26	10.57	10.49	16	Saaristoa abnormis	10.57
Saaristoa firma	2	0	0	0	0	Walckenaeria cuspidata	10.26	10.57	10.48	14	Saaristoa abnormis	10.57
Saloca diceros	2	2.14	2.14	2.14	2.14	Ceratinella brevis	12.56	13.32	12.56	16
Saloca diceros	2	2.14	2.14	2.14	2.14	Pocadicnemis juncea	12.56	13.32	12.94	4
Salticus cingulatus	20	0.31	0	0.31	0.61	Salticus scenicus	5.67	6.74	6.13	35	Salticus zebraneus	7.96
Salticus scenicus	42	1.6	0	0.61	3.37	Salticus cingulatus	5.67	6.74	6.13	35	Salticus zebraneus	7.66
Salticus zebraneus	12	0.08	0	0.08	0.15	Salticus scenicus	6.74	7.66	7.35	28	Salticus cingulatus	7.96
Sardinidion blackwalli	2	0	0	0	0	Cryptachaea riparia	11.79	11.79	11.79	2
Sardinidion blackwalli	2	0	0	0	0	Enoplognatha thoracica	11.79	12.86	11.94	14
Savignia frontata	12	0	0	0	0	Diplocephalus latifrons	10.61	11.77	11.18	40
Scotophaeus blackwalli	0					Apostenus fuscus	13.02	13.48	13.17	8	Scotophaeus scutulatus	15.62
Scotophaeus blackwalli	0					Cybaeus tetricus	13.02	13.02	13.02	3	Scotophaeus scutulatus	15.62
Scotophaeus quadripunctatus	6	0.23	0	0.35	0.35	Haplodrassus signifer	12.8	16.23	15.71	30	Scotophaeus scutulatus	14.61
Scotophaeus scutulatus	20	0.06	0	0	0.15	Zelotes longipes	12.25	12.71	12.4	25	Scotophaeus blackwalli	15.62
Scytodes thoracica	12	2.63	0	3.59	4.14	Eratigena agrestis	17.83	19.5	18.79	16
Segestria bavarica	2	1.88	1.88	1.88	1.88	Talavera aequipes	17.71	17.92	17.81	2	Segestria senoculata	19.6
Segestria senoculata	42	1.04	0.16	1.14	1.99	Segestria bavarica	18.34	19.6	18.98	14	Segestria bavarica	19.6
Sibianor aurocinctus	0					Sibianor larae	6.43	6.69	6.58	3	Sibianor larae	6.69
Sibianor larae	6	0.54	0.17	0.69	0.77	Sibianor aurocinctus	6.43	6.69	6.58	3	Sibianor aurocinctus	6.69
Silometopus ambiguus	0					Silometopus incurvatus	5.51	5.51	5.51	1	Silometopus elegans	8.12
Silometopus elegans	2	0.31	0.31	0.31	0.31	Silometopus reussi	2.6	2.76	2.68	4	Silometopus incurvatus	8.73
Silometopus incurvatus	0					Silometopus ambiguus	5.51	5.51	5.51	1	Silometopus elegans	8.73
Silometopus reussi	2	0.15	0.15	0.15	0.15	Silometopus elegans	2.6	2.76	2.68	4	Silometopus incurvatus	8.58
Simitidion simile	12	0.08	0	0.08	0.15	Theridion boesenbergi	9.19	9.49	9.34	8
Simitidion simile	12	0.08	0	0.08	0.15	Theridion pinastri	9.19	9.49	9.19	44
Singa hamata	2	0	0	0	0	Singa nitidula	7.2	8.42	7.35	6	Singa nitidula	8.42
Singa nitidula	6	1.33	0.15	1.84	1.99	Singa hamata	7.2	8.42	7.35	6	Singa hamata	8.42
Sintula corniger	0					Porrhomma pygmaeum	15.41	15.62	15.56	10
Sitticus distinguendus	0					Sitticus floricola	8.42	8.58	8.42	3	Sitticus saltator	10.87
Sitticus floricola	6	0.31	0	0.46	0.46	Sitticus saltator	7.5	7.66	7.66	30	Sitticus terebratus	9.04
Sitticus penicillatus	6	1.12	1.07	1.07	1.23	Sitticus floricola	8.27	8.58	8.42	9	Sitticus zimmermanni	11.67
Sitticus pubescens	2	5.21	5.21	5.21	5.21	Sitticus terebratus	7.35	7.81	7.58	2	Sitticus penicillatus	11.33
Sitticus saltator	90	0	0	0	0	Sitticus floricola	7.5	7.66	7.66	30	Sitticus penicillatus	11.33
Sitticus terebratus	0					Sitticus pubescens	7.35	7.81	7.58	2	Sitticus penicillatus	11.03
Sitticus zimmermanni	2	0.67	0.67	0.67	0.67	Sitticus floricola	8.58	8.83	8.7	6	Sitticus penicillatus	11.67
Spermophora kerinci	2	0	0	0	0	Agelena labyrinthica	16.69	17.11	16.86	14
Steatoda albomaculata	90	1.11	0	0.77	3.68	Crustulina guttata	12.4	13.16	12.83	40	Steatoda grossa	18.99
Steatoda bipunctata	156	2.19	0	1.68	7.03	Crustulina sticta	10.57	11.66	11.18	26	Steatoda grossa	17.76
Steatoda grossa	2	2.3	2.3	2.3	2.3	Crustulina guttata	15.77	16.45	16.08	8	Steatoda albomaculata	18.99
Steatoda grossa	2	2.3	2.3	2.3	2.3	Steatoda bipunctata	15.77	17.76	16.58	26	Steatoda albomaculata	18.99
Steatoda triangulosa	30	0.21	0	0.15	0.61	Crustulina guttata	10.89	12.25	11.79	24	Steatoda grossa	18.07
Stemonyphantes lineatus	20	0.13	0	0	0.35	Centromerus semiater	12.62	13.83	13.64	10
Styloctetor romanus	20	0.18	0	0	0.46	Ceratinella brevipes	9.34	9.65	9.34	20
Synageles hilarulus	2	0.49	0.49	0.49	0.49	Synageles venator	7.5	8.1	7.62	12	Synageles venator	8.1
Synageles venator	30	0.26	0	0.15	0.61	Synageles hilarulus	7.5	8.1	7.62	12	Synageles hilarulus	8.1
Synema globosum	30	0.38	0	0.31	0.78	Dolomedes plantarius	10.4	11.03	10.56	12
Talavera aequipes	0					Talavera petrensis	7.81	8.58	8.19	2	Talavera petrensis	8.58
Talavera petrensis	2	0.77	0.77	0.77	0.77	Talavera aequipes	7.81	8.58	8.19	2	Talavera aequipes	8.58
Tallusia experta	6	0.61	0	0.92	0.92	Centromerus incilium	9.5	10.26	9.8	9
Tapinocyba affinis	12	0.84	0	1.07	1.23	Tapinocyba pallens	1.07	2.3	1.76	8	Tapinocyba praecox	7.72
Tapinocyba insecta	6	0.31	0.15	0.31	0.46	Tapinocyba pallens	4.29	4.75	4.52	6	Tapinocyba praecox	7.87
Tapinocyba pallens	2	1.84	1.84	1.84	1.84	Tapinocyba affinis	1.07	2.3	1.76	8	Tapinocyba praecox	7.24
Tapinocyba praecox	0					Tapinocyba affinis	6.93	7.72	7.4	4	Tapinocyba insecta	7.87
Tapinocyba praecox	0					Tapinocyba pallens	6.93	7.24	7.09	2	Tapinocyba insecta	7.87
Tapinopa longidens	20	0.31	0	0.31	0.61	Lepthyphantes keyserlingi	14.24	14.4	14.4	5
Taranucnus setosus	12	0.08	0	0.08	0.15	Tenuiphantes cristatus	13.78	14.07	13.94	28
Tegenaria domestica	2	0	0	0	0	Tegenaria silvestris	14.09	14.55	14.09	8	Tegenaria silvestris	14.55
Tegenaria ferruginea	30	0.1	0	0	0.31	Tegenaria silvestris	10.89	11.49	11.03	24	Tegenaria domestica	14.55
Tegenaria silvestris	12	0.23	0	0.23	0.46	Tegenaria ferruginea	10.89	11.49	11.03	24	Tegenaria domestica	14.55
Tenuiphantes alacris	56	0.28	0	0.23	0.61	Tenuiphantes cristatus	10.63	11.18	10.87	56	Tenuiphantes flavipes	13.9
Tenuiphantes cristatus	42	0.12	0	0.15	0.31	Tenuiphantes alacris	10.63	11.18	10.87	56	Tenuiphantes tenuis	14.41
Tenuiphantes flavipes	420	0.2	0	0.15	0.96	Tenuiphantes mengei	7.35	8.95	8.42	147	Tenuiphantes cristatus	14.38
Tenuiphantes mengei	42	0.61	0	0.77	1.07	Tenuiphantes tenebricola	7.2	7.99	7.66	70	Tenuiphantes alacris	13.32
Tenuiphantes tenebricola	90	0.64	0	0.61	1.23	Tenuiphantes zimmermanni	5.82	6.76	6.43	80	Tenuiphantes cristatus	13.43
Tenuiphantes tenuis	182	0.43	0	0.15	2.3	Tenuiphantes mengei	7.81	9.34	8.27	98	Tenuiphantes cristatus	14.41
Tenuiphantes zimmermanni	56	0.08	0	0	0.31	Tenuiphantes tenebricola	5.82	6.76	6.43	80	Tenuiphantes alacris	13.17
Tetragnatha extensa	90	3.28	0	4.13	5.51	Tetragnatha montana	11.33	13.98	11.95	160	Tetragnatha nigrita	17.39
Tetragnatha montana	240	0.79	0	1.07	1.53	Tetragnatha obtusa	9.8	11.5	10.41	96	Tetragnatha nigrita	15.03
Tetragnatha nigrita	20	1.01	0.15	0.92	1.69	Tetragnatha montana	13.06	15.03	14.02	80	Tetragnatha extensa	17.39
Tetragnatha obtusa	30	1.77	0.15	1.07	4.44	Tetragnatha montana	9.8	11.5	10.41	96	Tetragnatha extensa	14.85
Tetragnatha pinicola	56	0.49	0	0.31	1.38	Tetragnatha extensa	12.86	14.42	13.32	80	Tetragnatha nigrita	15.31
Tetragnatha pinicola	56	0.49	0	0.31	1.38	Tetragnatha obtusa	12.86	13.8	13.41	48	Tetragnatha nigrita	15.31
Textrix denticulata	20	0.34	0	0.46	0.62	Hahnia pusilla	13.32	14.7	13.82	40
Thanatus arenarius	0					Thanatus formicinus	7.92	8.09	8	2	Thanatus atratus	14.52
Thanatus atratus	0					Thanatus vulgaris	11.94	12.42	12.18	2	Thanatus arenarius	14.52
Thanatus formicinus	2	0.77	0.77	0.77	0.77	Thanatus arenarius	7.92	8.09	8	2	Thanatus sabulosus	14.55
Thanatus sabulosus	2	0.15	0.15	0.15	0.15	Tibellus maritimus	12.1	13.02	12.56	12	Thanatus formicinus	14.55
Thanatus sabulosus	2	0.15	0.15	0.15	0.15	Tibellus oblongus	12.1	12.86	12.71	20	Thanatus formicinus	14.55
Thanatus vulgaris	2	0.32	0.32	0.32	0.32	Thanatus atratus	11.94	12.42	12.18	2	Thanatus formicinus	14.09
Theridion boesenbergi	2	0.15	0.15	0.15	0.15	Simitidion simile	9.19	9.49	9.34	8	Theridion familiare	12.71
Theridion familiare	2	3.37	3.37	3.37	3.37	Theridion mystaceum	9.19	10.57	9.8	10	Theridion varians	14.24
Theridion hemerobium	2	0	0	0	0	Theridion pictum	6.74	7.2	6.74	8	Theridion mystaceum	13.94
Theridion mystaceum	20	1.26	0	0.61	2.76	Theridion familiare	9.19	10.57	9.8	10	Theridion hemerobium	13.94
Theridion pictum	12	0.33	0	0.38	0.46	Theridion hemerobium	6.74	7.2	6.74	8	Theridion familiare	13.63
Theridion pinastri	110	0.27	0	0.31	1.07	Cryptachaea riparia	9.19	9.65	9.19	11	Theridion familiare	13.02
Theridion pinastri	110	0.27	0	0.31	1.07	Simitidion simile	9.19	9.49	9.19	44	Theridion familiare	13.02
Theridion varians	182	0.69	0	0.46	2.3	Theridion hemerobium	7.2	7.96	7.5	28	Theridion familiare	14.24
Theridiosoma gemmosum	20	0	0	0	0	Larinioides patagiatus	13.48	14.44	14.19	50
Thomisus onustus	42	1.08	0	1.76	2.3	Oxyopes ramosus	9.95	11.79	10.26	49
Thomisus onustus	42	1.08	0	1.76	2.3	Xerolycosa miniata	9.95	11.49	10.26	91
Thyreosthenius parasiticus	2	0	0	0	0	Tapinocyba praecox	9.63	9.98	9.81	2
Tibellus maritimus	30	0.9	0	0.77	1.75	Tibellus oblongus	0	1.84	0.61	60	Tibellus oblongus	1.84
Tibellus oblongus	90	0.46	0	0.61	0.92	Tibellus maritimus	0	1.84	0.61	60	Tibellus maritimus	1.84
Tiso vagans	42	0.25	0	0.31	0.46	Tapinocyba affinis	11.49	12.1	11.79	28
Titanoeca psammophila	182	0.02	0	0	0.15	Titanoeca quadriguttata	3.83	4.44	4.29	210	Titanoeca quadriguttata	4.44
Titanoeca quadriguttata	210	0.13	0	0	0.61	Titanoeca psammophila	3.83	4.44	4.29	210	Titanoeca psammophila	4.44
Tmarus piger	20	3.94	0	5.97	6.74	Thomisus onustus	10.41	11.33	11.18	35
Trachyzelotes pedestris	30	0.17	0	0.31	0.34	Zelotes longipes	9.95	10.65	10.11	30
Trematocephalus cristatus	20	0.18	0	0.15	0.46	Trichopterna cito	13.94	14.58	14.26	15
Trematocephalus cristatus	20	0.18	0	0.15	0.46	Walckenaeria acuminata	13.94	14.4	14.24	30
Triaeris stenaspis	2	0	0	0	0	Centromerus semiater	18.34	20.55	19.52	4
Trichopterna cito	6	0.31	0	0.46	0.48	Lophomma punctatum	9.34	10.11	9.63	12
Trichopterna cito	6	0.31	0	0.46	0.48	Walckenaeria acuminata	9.34	10.87	9.62	18
Trochosa ruricola	12	1.07	0	1.07	2.14	Trochosa terricola	4.59	5.21	4.9	44	Trochosa spinipalpis	5.67
Trochosa spinipalpis	20	0.37	0	0.61	0.61	Trochosa terricola	3.52	3.98	3.68	55	Trochosa ruricola	5.67
Trochosa terricola	110	0.54	0	0.62	0.92	Trochosa spinipalpis	3.52	3.98	3.68	55	Trochosa ruricola	5.21
Troxochrus scabriculus	30	0.41	0	0.77	0.77	Tapinocyba praecox	11.02	11.5	11.5	6
Typhochrestus digitatus	0					Ceratinella brevis	10.72	11.64	11.03	8
Uloborus plumipes	12	0.23	0	0.23	0.46	Uloborus walckenaerius	8.12	8.27	8.27	4	Uloborus walckenaerius	8.27
Uloborus walckenaerius	0					Uloborus plumipes	8.12	8.27	8.27	4	Uloborus plumipes	8.27
Walckenaeria acuminata	30	0.41	0	0.15	1.23	Walckenaeria mitrata	6.89	7.04	7.04	6	Walckenaeria dysderoides	11.43
Walckenaeria alticeps	156	0.27	0	0.15	1.07	Walckenaeria dysderoides	8.58	10.11	9.34	117	Walckenaeria vigilax	12.25
Walckenaeria atrotibialis	110	0.35	0	0.15	1.23	Walckenaeria kochi	9.04	9.49	9.34	44	Walckenaeria corniculans	13.26
Walckenaeria corniculans	30	0.13	0	0.15	0.31	Walckenaeria monoceros	3.83	4.15	3.91	6	Walckenaeria atrotibialis	13.26
Walckenaeria cucullata	72	0.32	0	0.31	0.77	Walckenaeria cuspidata	8.55	9.19	9.04	63	Walckenaeria vigilax	13.48
Walckenaeria cuspidata	42	0.13	0	0.15	0.32	Walckenaeria nudipalpis	8.06	9.38	8.73	56	Walckenaeria monoceros	11.64
Walckenaeria dysderoides	72	1.56	0	1.84	2.71	Walckenaeria alticeps	8.58	10.11	9.34	117	Walckenaeria monoceros	13.18
Walckenaeria furcillata	2	1.38	1.38	1.38	1.38	Walckenaeria cuspidata	8.87	9.8	9.42	14	Walckenaeria atrotibialis	12.25
Walckenaeria kochi	12	0.18	0	0.15	0.31	Walckenaeria unicornis	6.43	6.74	6.66	48	Walckenaeria corniculans	11.82
Walckenaeria mitrata	0					Walckenaeria acuminata	6.89	7.04	7.04	6	Walckenaeria nudipalpis	12.72
Walckenaeria monoceros	0					Walckenaeria corniculans	3.83	4.15	3.91	6	Walckenaeria dysderoides	13.18
Walckenaeria nudipalpis	56	0.7	0	0.72	1.53	Walckenaeria obtusa	5.52	6.84	6.28	40	Walckenaeria mitrata	12.72
Walckenaeria obtusa	20	0.21	0	0.15	0.46	Walckenaeria nudipalpis	5.52	6.84	6.28	40	Walckenaeria vigilax	13.17
Walckenaeria unicornis	132	0	0	0	0	Walckenaeria kochi	6.43	6.74	6.66	48	Walckenaeria mitrata	11.79
Walckenaeria vigilax	0					Walckenaeria acuminata	9.95	10.41	10.11	6	Walckenaeria cucullata	13.48
Walckenaeria vigilax	0					Walckenaeria kochi	9.95	10.11	10.03	4	Walckenaeria cucullata	13.48
Walckenaeria vigilax	0					Walckenaeria unicornis	9.95	9.95	9.95	12	Walckenaeria cucullata	13.48
Xerolycosa miniata	156	0.61	0	1.07	1.07	Xerolycosa nemoralis	5.05	5.67	5.36	377	Xerolycosa nemoralis	5.67
Xerolycosa nemoralis	812	1.28	0	2.45	2.6	Xerolycosa miniata	5.05	5.67	5.36	377	Xerolycosa miniata	5.67
Xysticus acerbus	72	0.73	0	0.74	1.57	Xysticus luctuosus	6.88	7.96	7.19	18	Xysticus ulmi	11.64
Xysticus audax	30	1.3	0.15	1.84	2.3	Xysticus cristatus	0	2.3	0.33	120	Xysticus bifasciatus	11.49
Xysticus bifasciatus	56	1.24	0.15	1.38	2.36	Xysticus ulmi	7.34	10.11	8.46	104	Xysticus kochi	11.79
Xysticus cristatus	380	0.35	0	0.16	1.53	Xysticus audax	0	2.3	0.33	120	Xysticus bifasciatus	11.59
Xysticus erraticus	12	1.23	0.15	1.23	2.3	Xysticus kochi	7.04	8.88	7.81	68	Xysticus ulmi	11.94
Xysticus gallicus	0					Xysticus kochi	3.22	4.9	4.59	17	Xysticus bifasciatus	11.33
Xysticus kochi	272	1.8	0	2.53	3.37	Xysticus gallicus	3.22	4.9	4.59	17	Xysticus bifasciatus	11.79
Xysticus lanio	30	1.46	0.31	0.92	3.29	Xysticus ulmi	6.58	8.12	7.66	78	Xysticus acerbus	11.18
Xysticus lineatus	0					Xysticus luctuosus	7.2	7.2	7.2	2	Xysticus erraticus	10.87
Xysticus luctator	0					Xysticus lanio	9.04	9.54	9.19	6	Xysticus acerbus	11.49
Xysticus luctator	0					Xysticus luctuosus	9.04	9.34	9.19	2	Xysticus acerbus	11.49
Xysticus luctuosus	2	0.31	0.31	0.31	0.31	Xysticus acerbus	6.88	7.96	7.19	18	Xysticus striatipes	10.21
Xysticus sabulosus	0					Xysticus bifasciatus	8.39	9.04	8.73	8	Xysticus ulmi	11.18
Xysticus striatipes	12	0.11	0	0.15	0.19	Xysticus acerbus	8.21	11.18	10.41	36	Xysticus bifasciatus	11.64
Xysticus ulmi	156	1.49	0	1.53	2.45	Xysticus lanio	6.58	8.12	7.66	78	Xysticus erraticus	11.94
Zelotes clivicola	12	0.15	0	0.15	0.31	Zelotes latreillei	2.45	3.22	2.91	24	Zelotes petrensis	9.04
Zelotes electus	20	0.37	0	0	0.92	Zelotes clivicola	6.13	6.58	6.28	20	Zelotes longipes	8.12
Zelotes latreillei	30	0.74	0	1.07	1.23	Zelotes clivicola	2.45	3.22	2.91	24	Zelotes petrensis	8.73
Zelotes longipes	20	0.52	0	0.15	1.23	Zelotes petrensis	3.52	4.29	3.68	30	Zelotes clivicola	8.88
Zelotes petrensis	30	0.05	0	0	0.15	Zelotes longipes	3.52	4.29	3.68	30	Zelotes clivicola	9.04
Zelotes subterraneus	20	0.8	0	0.61	1.23	Zelotes latreillei	3.52	4.29	3.98	30	Zelotes petrensis	8.58
Zilla diodia	0					Singa hamata	13.02	13.02	13.02	2
Zodarion italicum	6	0.41	0.15	0.46	0.61	Cryptachaea riparia	12.86	13.02	13.02	3	Zodarion rubidum	14.4
Zodarion rubidum	2	0	0	0	0	Cryptachaea riparia	12.25	12.25	12.25	2	Zodarion italicum	14.4
Zora silvestris	6	0.1	0	0.15	0.15	Zora spinimana	7.35	8.12	7.66	57	Zora spinimana	8.12
Zora spinimana	342	0.48	0	0.46	1.07	Zora silvestris	7.35	8.12	7.66	57	Zora silvestris	8.12
Zygiella atrica	0					Zygiella x-notata	5.41	5.82	5.67	7	Zygiella x-notata	5.82
Zygiella x-notata	42	0.04	0	0	0.15	Zygiella atrica	5.41	5.82	5.67	7	Zygiella atrica	5.82
