# Supplementary material for: Towards a DNA Barcode Reference Database for Spiders and Harvestmen of Germany
Source: PLoS One. 2016 Sep 28;11(9):e0162624. doi: 10.1371/journal.pone.0162624 (PMC5040438; doi:10.1371/journal.pone.0162624)
Supplement: S3 Table — Legend: see caption for S2 Table. (XLSX) [file pone.0162624.s009.xlsx]

## Sheet: Opiliones_Appendix_S3
Taxon	#_of_intrasp_distances	Intrasp_dist_Mean	Intrasp_dist_Min	Intrasp_dist_Median	Intrasp_dist_Max	Closest_Sp	Closest_Sp_Min_Dist	Closest_Sp_Max_Dist	Closest_Sp_Dist_Median	#_distances_to_Closest_Sp	most_distant_congener	most_distant_congener_Max_Dist
Amilenus aurantiacus	380	0.1	0	0	0.61	Phalangium opilio	15.53	17.61	16.85	240
Anelasmocephalus cambridgei	0					Trogulus martensi	21.78	22.27	22.03	2
Astrobunus laevipes	6	1.12	0.46	1.38	1.53	Mitopus morio	20.46	22.82	21.63	45
Dicranopalpus gasteinensis	0					Paroligolophus agrestis	17.55	18.1	17.76	10
Gyas titanus	6	0.2	0.15	0.15	0.31	Mitopus morio	13.78	16.39	15.31	45
Ischyropsalis kollari	0					Mitopus morio	18.53	20.37	19.45	15
Ischyropsalis kollari	0					Paroligolophus agrestis	18.53	18.78	18.68	10
Lacinius dentiger	30	1.39	0	0.16	4.04	Lophopilio palpinalis	12.25	13.16	12.71	30	Lacinius ephippiatus	15.99
Lacinius ephippiatus	6	2.91	0.77	3.83	4.13	Paroligolophus agrestis	12.01	13.17	12.7	30	Lacinius dentiger	15.99
Leiobunum blackwalli	12	0	0	0	0	Nelima silvatica	17.3	17.3	17.3	4	Leiobunum rotundum	18.38
Leiobunum limbatum	0					Leiobunum religiosum	17.18	17.61	17.3	3	Leiobunum rotundum	18.84
Leiobunum religiosum	6	0.31	0.15	0.31	0.46	Leiobunum limbatum	17.18	17.61	17.3	3	Leiobunum rotundum	18.68
Leiobunum rotundum	6	1.44	0.92	1.4	2.02	Opilio canestrinii	17.55	18.28	18.07	33	Leiobunum limbatum	18.84
Lophopilio palpinalis	20	0.97	0	0.31	2.47	Paroligolophus agrestis	11	12.32	11.18	50
Megabunus lesserti	6	0.72	0	0.92	1.23	Platybunus bucephalus	13.71	14.13	13.82	3
Mitopus morio	210	5.27	0	5.99	8.88	Oligolophus hanseni	10.72	13.63	11.49	15
Mitostoma chrysomelas	30	0.58	0.15	0.61	0.93	Nemastoma bidentatum	20.71	20.98	20.91	6
Nelima silvatica	0					Leiobunum blackwalli	17.3	17.3	17.3	4
Nemastoma bidentatum	0					Nemastoma triste	13.02	13.32	13.06	7	Nemastoma lugubre	14.11
Nemastoma bimaculatum	0					Nemastoma lugubre	9.19	11.33	10.87	9	Nemastoma bidentatum	13.94
Nemastoma dentigerum	30	0.64	0.18	0.61	1.54	Nemastoma lugubre	7.67	14.26	13.2	54	Nemastoma triste	14.88
Nemastoma lugubre	72	2.16	0	1.23	6.74	Nemastoma dentigerum	7.67	14.26	13.2	54	Nemastoma dentigerum	14.26
Nemastoma triste	42	0.09	0	0.15	0.31	Nemastoma lugubre	9.83	12.1	10.6	63	Nemastoma dentigerum	14.88
Odiellus spinosus	20	0.43	0.15	0.38	0.77	Paroligolophus agrestis	10.15	11.49	10.57	50
Oligolophus hanseni	0					Mitopus morio	10.72	13.63	11.49	15	Oligolophus tridens	14.71
Oligolophus tridens	156	0.2	0	0.15	0.62	Lophopilio palpinalis	13.06	14.41	13.48	65	Oligolophus hanseni	14.71
Opilio canestrinii	110	0.06	0	0	0.31	Paroligolophus agrestis	13.32	14.38	13.94	110	Opilio parietinus	15.21
Opilio parietinus	6	0	0	0	0	Odiellus spinosus	11.18	11.79	11.49	15	Opilio canestrinii	15.21
Paranemastoma quadripunctatum	306	0.18	0	0.15	0.61	Nemastoma lugubre	16	17.08	16.69	162
Paroligolophus agrestis	90	0.63	0	0.17	1.71	Odiellus spinosus	10.15	11.49	10.57	50
Phalangium opilio	132	3.91	0	1.15	8.73	Paroligolophus agrestis	13.71	15.37	14.24	120
Platybunus bucephalus	0					Megabunus lesserti	13.71	14.13	13.82	3	Platybunus pinetorum	14.91
Platybunus pinetorum	12	0.15	0	0.15	0.31	Opilio parietinus	13.18	14.4	14.4	12	Platybunus bucephalus	14.91
Rilaena triangularis	90	1.39	0	0.61	3.52	Platybunus pinetorum	13.78	15.01	14.62	40
Trogulus martensi	2	0.77	0.77	0.77	0.77	Trogulus nepaeformis	7.04	7.31	7.18	6	Trogulus tricarinatus	13.02
Trogulus nepaeformis	6	2.53	0	3.7	3.88	Trogulus martensi	7.04	7.31	7.18	6	Trogulus tricarinatus	12.58
Trogulus tingiformis	0					Trogulus martensi	10.14	10.46	10.3	2	Trogulus tricarinatus	13.36
Trogulus tricarinatus	0					Trogulus nepaeformis	12.04	12.58	12.1	3	Trogulus tingiformis	13.36
