# Supplementary material for: Towards a DNA Barcode Reference Database for Spiders and Harvestmen of Germany
Source: PLoS One. 2016 Sep 28;11(9):e0162624. doi: 10.1371/journal.pone.0162624 (PMC5040438; doi:10.1371/journal.pone.0162624)
Supplement: S4 Table — This table contains the 352 pairwise comparisons with the highest conspecific p-distances in the dataset, ranging from 10 to 3% (range 5 to 3% given in gray, denoting an 'uncertainty zone' for average species limits in this scenario). 164 comparisons have values above 4%. Specimens are identified through species name and ID (see S1 Table for more details). (XLSX) [file pone.0162624.s010.xlsx]

## Sheet: splits
Sequence name	Largest conspecific match	Distance
Aelurillus v-insignitus SMNKARA08276	Aelurillus v-insignitus ZSMARACH00696	10.1
Aelurillus v-insignitus ZSMARACH00696	Aelurillus v-insignitus SMNKARA08276	10.1
Aelurillus v-insignitus ZFMKTIS4954	Aelurillus v-insignitus ZSMARACH00696	9.8
Aelurillus v-insignitus SMNKARA08875	Aelurillus v-insignitus ZSMARACH00696	9.64
Aelurillus v-insignitus SMNKARA08876	Aelurillus v-insignitus ZSMARACH00696	9.64
Aelurillus v-insignitus SMNKARA08274	Aelurillus v-insignitus ZSMARACH00696	9.49
Aelurillus v-insignitus SMNKARA08350	Aelurillus v-insignitus ZSMARACH00696	9.49
Aelurillus v-insignitus SMNKARA08878	Aelurillus v-insignitus ZSMARACH00696	9.49
Aelurillus v-insignitus SMNSAran814	Aelurillus v-insignitus ZSMARACH00696	9.49
Aelurillus v-insignitus SMNSAran825	Aelurillus v-insignitus ZSMARACH00696	9.49
Aelurillus v-insignitus SMNKARA08275	Aelurillus v-insignitus ZSMARACH00696	9.34
Aelurillus v-insignitus ZSMARACH00263	Aelurillus v-insignitus ZSMARACH00696	9.34
Aelurillus v-insignitus SMNKARA08874	Aelurillus v-insignitus ZSMARACH00696	9.18
Aelurillus v-insignitus SMNKARA08877	Aelurillus v-insignitus ZSMARACH00696	9.18
Mitopus morio SMNSOpilLFR001	Mitopus morio ZFMKTIS2504928	8.88
Mitopus morio SMNSOpilLFR054	Mitopus morio SMNSOpilLFR001	8.88
Mitopus morio ZFMKTIS2504927	Mitopus morio SMNSOpilLFR001	8.88
Mitopus morio ZFMKTIS2504928	Mitopus morio SMNSOpilLFR001	8.88
Mitopus morio ZSMARACH00038	Mitopus morio ZFMKTIS2504928	8.72
Phalangium opilio ZFMKTIS19207	Phalangium opilio ZFMKTIS2534449	8.72
Phalangium opilio ZFMKTIS2453	Phalangium opilio ZFMKTIS2534449	8.72
Phalangium opilio ZFMKTIS2534449	Phalangium opilio ZFMKTIS2453	8.72
Phalangium opilio ZFMKTIS2662	Phalangium opilio ZFMKTIS7042	8.72
Phalangium opilio ZFMKTIS7042	Phalangium opilio ZFMKTIS2662	8.72
Phalangium opilio SMNSOpilLFR062	Phalangium opilio ZFMKTIS2534449	8.57
Phalangium opilio SMNSOpilLFR068	Phalangium opilio ZFMKTIS2534449	8.57
Phalangium opilio SMNSOpilLFR079	Phalangium opilio ZFMKTIS2453	8.57
Phalangium opilio ZFMKTIS2531581	Phalangium opilio ZFMKTIS2534449	8.57
Phalangium opilio ZSMARACH00035	Phalangium opilio ZFMKTIS2534449	8.57
Mitopus morio ZFMKTIS2672	Mitopus morio ZFMKTIS2504928	8.42
Phalangium opilio SMNSOpilLFR007	Phalangium opilio ZFMKTIS2534449	8.42
Phalangium opilio ZFMKTIS2524850	Phalangium opilio ZFMKTIS2534449	8.42
Mitopus morio ZFMKTIS2471	Mitopus morio ZFMKTIS2504928	8.26
Mitopus morio ZFMKTIS2504893	Mitopus morio ZFMKTIS2504928	8.26
Mitopus morio SMNSOpil1002	Mitopus morio ZFMKTIS2504928	8.11
Mitopus morio SMNSOpil1003	Mitopus morio ZFMKTIS2504928	8.11
Mitopus morio SMNSOpil1006	Mitopus morio ZFMKTIS2504928	8.11
Mitopus morio ZFMKTIS19118	Mitopus morio ZFMKTIS2504928	8.11
Mitopus morio ZFMKTIS19319	Mitopus morio ZFMKTIS2504928	8.11
Mitopus morio SMNSOpilLFR055	Mitopus morio ZFMKTIS2504928	7.96
Mitopus morio ZFMKTIS2531606	Mitopus morio ZFMKTIS2504928	7.96
Clubiona corticalis ZFMKTIS7182	Clubiona corticalis ZSMARACH00432	6.73
Clubiona corticalis ZSMARACH00432	Clubiona corticalis ZFMKTIS7182	6.73
Nemastoma lugubre SMNSOpilLFR071	Nemastoma lugubre ZFMKTIS19324	6.73
Nemastoma lugubre ZFMKTIS19324	Nemastoma lugubre SMNSOpilLFR071	6.73
Steatoda bipunctata ZFMKTIS20972	Steatoda bipunctata ZSMARACH00159	6.73
Steatoda bipunctata ZSMARACH00159	Steatoda bipunctata ZFMKTIS20972	6.73
Tmarus piger SMNKARA08904	Tmarus piger ZSMARACH00453	6.73
Tmarus piger ZSMARACH00453	Tmarus piger SMNKARA08904	6.73
Clubiona corticalis ZSMARACH00430	Clubiona corticalis ZFMKTIS7182	6.58
Clubiona corticalis ZSMARACH00747	Clubiona corticalis ZFMKTIS7182	6.58
Tmarus piger ZFMKTIS15912	Tmarus piger ZSMARACH00453	6.58
Tmarus piger ZFMKTIS4942	Tmarus piger ZSMARACH00453	6.58
Eresus kollari SMNKARA08339	Eresus kollari ZSMARACH00575	6.43
Eresus kollari ZSMARACH00575	Eresus kollari SMNKARA08339	6.43
Nemastoma lugubre ZFMKTIS19334	Nemastoma lugubre SMNSOpilLFR071	6.43
Eresus kollari SMNKARA08340	Eresus kollari ZSMARACH00575	6.27
Eresus kollari SMNKARA08341	Eresus kollari ZSMARACH00575	6.27
Eresus kollari SMNKARA08890	Eresus kollari ZSMARACH00575	6.27
Nemastoma lugubre ZFMKTIS2692	Nemastoma lugubre SMNSOpilLFR071	6.27
Steatoda bipunctata ZFMKTIS20950	Steatoda bipunctata ZSMARACH00159	6.27
Nemastoma lugubre SMNSOpilLFR070	Nemastoma lugubre SMNSOpilLFR071	6.12
Nemastoma lugubre ZFMKTIS2534409	Nemastoma lugubre SMNSOpilLFR071	6.12
Steatoda bipunctata ZFMKTIS15936	Steatoda bipunctata ZSMARACH00159	6.12
Steatoda bipunctata ZFMKTIS20897	Steatoda bipunctata ZSMARACH00159	6.12
Steatoda bipunctata ZFMKTIS7029	Steatoda bipunctata ZSMARACH00159	6.12
Tmarus piger SMNKARA09083	Tmarus piger SMNKARA08904	6.12
Micaria pulicaria SMNKARA08932	Micaria pulicaria SMNKARA09079	5.97
Micaria pulicaria SMNKARA09079	Micaria pulicaria ZFMKTIS19148	5.97
Micaria pulicaria ZFMKTIS19148	Micaria pulicaria SMNKARA09079	5.97
Nemastoma lugubre ZFMKTIS19125	Nemastoma lugubre SMNSOpilLFR071	5.97
Nemastoma lugubre ZFMKTIS7048	Nemastoma lugubre SMNSOpilLFR071	5.97
Steatoda bipunctata ZFMKTIS22198	Steatoda bipunctata ZSMARACH00159	5.97
Steatoda bipunctata ZFMKTIS2663	Steatoda bipunctata ZSMARACH00159	5.97
Steatoda bipunctata ZFMKTIS2734	Steatoda bipunctata ZSMARACH00159	5.97
Steatoda bipunctata ZSMARACH00098	Steatoda bipunctata ZSMARACH00159	5.97
Hypsosinga albovittata ZFMKTIS7122	Hypsosinga albovittata ZSMARACH00390	5.81
Hypsosinga albovittata ZSMARACH00390	Hypsosinga albovittata ZFMKTIS7122	5.81
Micaria pulicaria ZSMARACH00372	Micaria pulicaria ZFMKTIS19148	5.81
Nemastoma lugubre ZFMKTIS2492	Nemastoma lugubre SMNSOpilLFR071	5.81
Steatoda bipunctata SMNSAran924	Steatoda bipunctata ZSMARACH00159	5.81
Steatoda bipunctata ZFMKTIS15929	Steatoda bipunctata ZSMARACH00159	5.81
Steatoda bipunctata ZFMKTIS20949	Steatoda bipunctata ZSMARACH00159	5.81
Micaria pulicaria ZSMARACH00230	Micaria pulicaria ZFMKTIS19148	5.66
Hypsosinga albovittata ZSMARACH00391	Hypsosinga albovittata ZFMKTIS7122	5.51
Nigma walckenaeri ZFMKTIS20911	Nigma walckenaeri ZFMKTIS7091	5.51
Nigma walckenaeri ZFMKTIS7091	Nigma walckenaeri ZFMKTIS20911	5.51
Tetragnatha extensa SMNSAran1009	Tetragnatha extensa ZSMARACH00366	5.51
Tetragnatha extensa ZSMARACH00366	Tetragnatha extensa SMNSAran1009	5.51
Micaria pulicaria ZFMKTIS19088	Micaria pulicaria SMNKARA09079	5.35
Sitticus pubescens ZSMARACH00233	Sitticus pubescens ZSMARACH00234	5.2
Sitticus pubescens ZSMARACH00234	Sitticus pubescens ZSMARACH00233	5.2
Tetragnatha extensa ZFMKTIS2354	Tetragnatha extensa SMNSAran1009	5.2
Tetragnatha extensa ZFMKTIS7207	Tetragnatha extensa SMNSAran1009	5.2
Tetragnatha extensa ZFMKTIS2534466	Tetragnatha extensa SMNSAran1009	5.05
Hahnia nava SMNKARA08864	Hahnia nava ZSMARACH00591	4.9
Hahnia nava SMNKARA08865	Hahnia nava ZSMARACH00591	4.9
Hahnia nava ZFMKTIS19074	Hahnia nava SMNKARA08865	4.9
Hahnia nava ZFMKTIS19102	Hahnia nava SMNKARA08865	4.9
Hahnia nava ZSMARACH00591	Hahnia nava SMNKARA08865	4.9
Tetragnatha extensa ZFMKTIS18361	Tetragnatha extensa SMNSAran1009	4.9
Tetragnatha extensa ZFMKTIS2528553	Tetragnatha extensa SMNSAran1009	4.9
Tetragnatha extensa ZFMKTIS2644	Tetragnatha extensa SMNSAran1009	4.9
Tetragnatha extensa ZSMARACH00365	Tetragnatha extensa SMNSAran1009	4.9
Mangora acalypha SMNKARA08352	Mangora acalypha SMNSAran955	4.74
Mangora acalypha SMNKARA08851	Mangora acalypha SMNSAran955	4.74
Mangora acalypha SMNSAran955	Mangora acalypha ZFMKTIS18449	4.74
Mangora acalypha ZFMKTIS18449	Mangora acalypha SMNSAran955	4.74
Pardosa hortensis SMNKARA08171	Pardosa hortensis SMNKARA08896	4.74
Pardosa hortensis SMNKARA08896	Pardosa hortensis SMNKARA08171	4.74
Tetragnatha extensa ZFMKTIS2528552	Tetragnatha extensa SMNSAran1009	4.74
Diplocephalus latifrons SMNKARA08947	Diplocephalus latifrons ZFMKTIS22204	4.59
Diplocephalus latifrons ZFMKTIS22204	Diplocephalus latifrons SMNKARA08947	4.59
Drassodes lapidosus SMNSAran892	Drassodes lapidosus ZFMKTIS2517092	4.59
Drassodes lapidosus ZFMKTIS2517092	Drassodes lapidosus ZFMKTIS5016	4.59
Drassodes lapidosus ZFMKTIS5016	Drassodes lapidosus ZFMKTIS2517092	4.59
Hahnia nava ZFMKTIS2517378	Hahnia nava SMNKARA08865	4.59
Mangora acalypha ZSMARACH00377	Mangora acalypha SMNSAran955	4.59
Pardosa hortensis ZFMKTIS2480	Pardosa hortensis SMNKARA08171	4.59
Centromerus pabulator ZFMKTIS2504905	Centromerus pabulator ZFMKTIS7079	4.44
Centromerus pabulator ZFMKTIS7079	Centromerus pabulator ZFMKTIS2504905	4.44
Cnephalocotes obscurus ZFMKTIS19092	Cnephalocotes obscurus ZFMKTIS2534430	4.44
Cnephalocotes obscurus ZFMKTIS2534430	Cnephalocotes obscurus ZFMKTIS19092	4.44
Drassodes lapidosus SMNSAran893	Drassodes lapidosus ZFMKTIS2517092	4.44
Drassodes lapidosus SMNSAran894	Drassodes lapidosus ZFMKTIS2517092	4.44
Drassodes lapidosus SMNSAran895	Drassodes lapidosus ZFMKTIS2517092	4.44
Drassodes lapidosus SMNSAranJHS387	Drassodes lapidosus ZFMKTIS5016	4.44
Drassodes lapidosus ZFMKTIS20930	Drassodes lapidosus ZFMKTIS5016	4.44
Drassodes lapidosus ZSMARACH00093	Drassodes lapidosus ZFMKTIS2517092	4.44
Drassodes lapidosus ZSMARACH00664	Drassodes lapidosus ZFMKTIS2517092	4.44
Drassodes lapidosus ZSMARACH00707	Drassodes lapidosus ZFMKTIS2517092	4.44
Mangora acalypha ZFMKTIS18401	Mangora acalypha SMNSAran955	4.44
Mangora acalypha ZFMKTIS2534414	Mangora acalypha SMNSAran955	4.44
Mangora acalypha ZFMKTIS2534476	Mangora acalypha SMNSAran955	4.44
Pardosa hortensis SMNKARA08174	Pardosa hortensis SMNKARA08171	4.44
Pardosa hortensis SMNKARA08981	Pardosa hortensis SMNKARA08171	4.44
Pardosa hortensis SMNSAranJHS388	Pardosa hortensis SMNKARA08171	4.44
Pardosa hortensis ZFMKTIS2523257	Pardosa hortensis SMNKARA08171	4.44
Pardosa hortensis ZSMARACH00670	Pardosa hortensis SMNKARA08171	4.44
Pardosa hortensis ZSMARACH00671	Pardosa hortensis SMNKARA08171	4.44
Tetragnatha obtusa ZFMKTIS2531598	Tetragnatha obtusa ZFMKTIS2531599	4.44
Tetragnatha obtusa ZFMKTIS2531599	Tetragnatha obtusa ZFMKTIS2531598	4.44
Cnephalocotes obscurus SMNKARA08945	Cnephalocotes obscurus ZFMKTIS19092	4.28
Diplocephalus latifrons ZFMKTIS22203	Diplocephalus latifrons SMNKARA08947	4.28
Diplocephalus latifrons ZFMKTIS2504898	Diplocephalus latifrons ZFMKTIS22204	4.28
Drassodes lapidosus ZFMKTIS2673	Drassodes lapidosus ZFMKTIS2517092	4.28
Mangora acalypha ZFMKTIS18448	Mangora acalypha SMNSAran955	4.28
Mangora acalypha ZFMKTIS2531609	Mangora acalypha SMNSAran955	4.28
Mangora acalypha ZSMARACH00376	Mangora acalypha SMNSAran955	4.28
Pardosa hortensis SMNKARA08175	Pardosa hortensis SMNKARA08171	4.28
Diplocephalus latifrons ZFMKTIS2516906	Diplocephalus latifrons ZFMKTIS22204	4.13
Diplocephalus latifrons ZFMKTIS2523246	Diplocephalus latifrons ZFMKTIS2504898	4.13
Lacinius ephippiatus ZFMKTIS2456	Lacinius ephippiatus ZFMKTIS2690	4.13
Lacinius ephippiatus ZFMKTIS2690	Lacinius ephippiatus ZFMKTIS2456	4.13
Mangora acalypha SMNKARA08853	Mangora acalypha SMNSAran955	4.13
Mangora acalypha ZFMKTIS22285	Mangora acalypha SMNSAran955	4.13
Mangora acalypha ZFMKTIS2531775	Mangora acalypha SMNSAran955	4.13
Mangora acalypha ZFMKTIS4983	Mangora acalypha SMNSAran955	4.13
Mangora acalypha ZFMKTIS9648	Mangora acalypha SMNSAran955	4.13
Metellina merianae SMNKARA08920	Metellina merianae ZFMKTIS21365	4.13
Metellina merianae ZFMKTIS21365	Metellina merianae SMNKARA08920	4.13
Scytodes thoracica ZFMKTIS19152	Scytodes thoracica ZSMGBOL01997	4.13
Scytodes thoracica ZSMGBOL01997	Scytodes thoracica ZFMKTIS19152	4.13
Tetragnatha obtusa ZFMKTIS2525	Tetragnatha obtusa ZFMKTIS2531598	4.13
Cnephalocotes obscurus SMNKARA10003	Cnephalocotes obscurus ZFMKTIS19092	3.98
Cnephalocotes obscurus ZFMKTIS19151	Cnephalocotes obscurus ZFMKTIS19092	3.98
Diplocephalus latifrons ZFMKTIS2400	Diplocephalus latifrons ZFMKTIS22204	3.98
Diplocephalus latifrons ZSMARACH00170	Diplocephalus latifrons ZFMKTIS22204	3.98
Lacinius dentiger SMNSOpilLFR074	Lacinius dentiger ZFMKTIS7059	3.98
Lacinius dentiger SMNSOpilLFR083	Lacinius dentiger ZFMKTIS7059	3.98
Lacinius dentiger ZFMKTIS7059	Lacinius dentiger SMNSOpilLFR083	3.98
Mangora acalypha SMNKARA08850	Mangora acalypha SMNSAran955	3.98
Mangora acalypha SMNKARA08852	Mangora acalypha SMNSAran955	3.98
Mangora acalypha SMNSAran909	Mangora acalypha SMNSAran955	3.98
Neon reticulatus SMNKARA08872	Neon reticulatus ZSMARACH00648	3.98
Neon reticulatus ZFMKTIS2287	Neon reticulatus SMNKARA08872	3.98
Neon reticulatus ZFMKTIS2528557	Neon reticulatus SMNKARA08872	3.98
Neon reticulatus ZFMKTIS2528558	Neon reticulatus SMNKARA08872	3.98
Neon reticulatus ZFMKTIS2534425	Neon reticulatus SMNKARA08872	3.98
Neon reticulatus ZFMKTIS7129	Neon reticulatus SMNKARA08872	3.98
Neon reticulatus ZSMARACH00535	Neon reticulatus SMNKARA08872	3.98
Neon reticulatus ZSMARACH00648	Neon reticulatus SMNKARA08872	3.98
Pardosa hortensis SMNKARA08172	Pardosa hortensis SMNKARA08171	3.98
Pardosa hortensis SMNKARA08337	Pardosa hortensis SMNKARA08171	3.98
Pardosa hortensis SMNSAran828	Pardosa hortensis SMNKARA08171	3.98
Pardosa hortensis SMNSAran921	Pardosa hortensis SMNKARA08171	3.98
Pardosa hortensis ZFMKTIS22188	Pardosa hortensis SMNKARA08171	3.98
Pardosa hortensis ZFMKTIS2821	Pardosa hortensis SMNKARA08171	3.98
Diplocephalus latifrons ZFMKTIS2504899	Diplocephalus latifrons ZFMKTIS22204	3.82
Diplocephalus latifrons ZSMARACH00171	Diplocephalus latifrons ZFMKTIS22204	3.82
Lacinius dentiger SMNSOpilLFR020	Lacinius dentiger ZFMKTIS7059	3.82
Lacinius dentiger SMNSOpilLFR041	Lacinius dentiger ZFMKTIS7059	3.82
Lacinius dentiger SMNSOpilLFR044	Lacinius dentiger ZFMKTIS7059	3.82
Lacinius ephippiatus ZFMKTIS2512	Lacinius ephippiatus ZFMKTIS2456	3.82
Mangora acalypha SMNSAran963	Mangora acalypha SMNSAran955	3.82
Mangora acalypha ZSMGBOL08319	Mangora acalypha SMNSAran955	3.82
Metellina merianae ZFMKTIS21376	Metellina merianae ZFMKTIS21365	3.82
Tetragnatha obtusa ZSMARACH00396	Tetragnatha obtusa ZFMKTIS2531598	3.82
Trogulus nepaeformis ZFMKGBOL38864	Trogulus nepaeformis ZSMARACH00019	3.82
Trogulus nepaeformis ZSMARACH00019	Trogulus nepaeformis ZFMKGBOL38864	3.82
Metellina merianae SMNKARA08919	Metellina merianae SMNKARA08920	3.67
Metellina merianae SMNKARA08921	Metellina merianae SMNKARA08920	3.67
Metellina merianae ZFMKTIS2502010	Metellina merianae SMNKARA08920	3.67
Metellina merianae ZSMARACH00518	Metellina merianae ZFMKTIS21376	3.67
Steatoda albomaculata SMNKARA08267	Steatoda albomaculata SMNSAran819	3.67
Steatoda albomaculata SMNSAran819	Steatoda albomaculata SMNKARA08267	3.67
Tetragnatha obtusa ZFMKTIS2524878	Tetragnatha obtusa ZFMKTIS2531598	3.67
Tetragnatha obtusa ZSMARACH00397	Tetragnatha obtusa ZFMKTIS2531598	3.67
Trogulus nepaeformis ZSMARACH00020	Trogulus nepaeformis ZFMKGBOL38864	3.67
Euophrys frontalis SMNKARA08882	Euophrys frontalis ZFMKTIS9623	3.52
Euophrys frontalis SMNKARA08883	Euophrys frontalis ZFMKTIS9623	3.52
Euophrys frontalis SMNKARA08884	Euophrys frontalis SMNSAran943	3.52
Euophrys frontalis SMNKARA08965	Euophrys frontalis ZFMKTIS9623	3.52
Euophrys frontalis SMNSAran943	Euophrys frontalis ZFMKTIS9623	3.52
Euophrys frontalis ZFMKTIS9623	Euophrys frontalis SMNSAran943	3.52
Metellina merianae ZFMKTIS20908	Metellina merianae ZFMKTIS21376	3.52
Metellina merianae ZFMKTIS20958	Metellina merianae ZFMKTIS21376	3.52
Metellina merianae ZFMKTIS2403	Metellina merianae ZFMKTIS21376	3.52
Metellina merianae ZFMKTIS2726	Metellina merianae ZFMKTIS21376	3.52
Pelecopsis elongata ZSMARACH00221	Pelecopsis elongata ZSMARACH00222	3.52
Pelecopsis elongata ZSMARACH00222	Pelecopsis elongata ZSMARACH00221	3.52
Rilaena triangularis SMNSOpilLFR040	Rilaena triangularis ZFMKTIS2531600	3.52
Rilaena triangularis ZFMKTIS2505003	Rilaena triangularis SMNSOpilLFR040	3.52
Rilaena triangularis ZFMKTIS2531575	Rilaena triangularis SMNSOpilLFR040	3.52
Rilaena triangularis ZFMKTIS2531600	Rilaena triangularis SMNSOpilLFR040	3.52
Robertus lividus SMNKARA09000	Robertus lividus ZSMGBOL08338	3.52
Robertus lividus ZFMKTIS18350	Robertus lividus SMNKARA09000	3.52
Robertus lividus ZFMKTIS18378	Robertus lividus SMNKARA09000	3.52
Robertus lividus ZFMKTIS22277	Robertus lividus SMNKARA09000	3.52
Robertus lividus ZFMKTIS2749	Robertus lividus SMNKARA09000	3.52
Robertus lividus ZFMKTIS7175	Robertus lividus SMNKARA09000	3.52
Robertus lividus ZSMGBOL08338	Robertus lividus SMNKARA09000	3.52
Scytodes thoracica SMNSAran1098	Scytodes thoracica ZFMKTIS19152	3.52
Scytodes thoracica ZFMKTIS2517028	Scytodes thoracica ZSMGBOL01997	3.52
Steatoda albomaculata SMNKARA08270	Steatoda albomaculata SMNKARA08267	3.52
Steatoda albomaculata SMNSAran833	Steatoda albomaculata SMNKARA08267	3.52
Steatoda albomaculata ZFMKTIS7146	Steatoda albomaculata SMNKARA08267	3.52
Steatoda albomaculata ZSMARACH00468	Steatoda albomaculata SMNKARA08267	3.52
Steatoda albomaculata ZSMARACH00469	Steatoda albomaculata SMNKARA08267	3.52
Asagena phalerata SMNKARA08201	Asagena phalerata ZFMKTIS7098	3.36
Asagena phalerata SMNSAran993	Asagena phalerata ZFMKTIS7098	3.36
Asagena phalerata ZFMKTIS22352	Asagena phalerata SMNSAran993	3.36
Asagena phalerata ZFMKTIS7098	Asagena phalerata SMNSAran993	3.36
Cyclosa conica ZFMKTIS20899	Cyclosa conica ZSMARACH00387	3.36
Cyclosa conica ZFMKTIS2531773	Cyclosa conica ZSMARACH00387	3.36
Cyclosa conica ZSMARACH00387	Cyclosa conica ZFMKTIS2531773	3.36
Dysdera crocata SMNKARA08237	Dysdera crocata SMNSAranJHS381	3.36
Dysdera crocata SMNSAranJHS381	Dysdera crocata SMNKARA08237	3.36
Euophrys frontalis SMNKARA08966	Euophrys frontalis SMNSAran943	3.36
Euophrys frontalis SMNKARA08967	Euophrys frontalis SMNSAran943	3.36
Euophrys frontalis ZFMKTIS18357	Euophrys frontalis SMNSAran943	3.36
Euophrys frontalis ZFMKTIS19094	Euophrys frontalis SMNSAran943	3.36
Euophrys frontalis ZFMKTIS2531586	Euophrys frontalis SMNSAran943	3.36
Evarcha falcata SMNSAran952	Evarcha falcata ZFMKTIS18414	3.36
Evarcha falcata ZFMKTIS18414	Evarcha falcata SMNSAran952	3.36
Haplodrassus signifer SMNKARA08855	Haplodrassus signifer ZSMARACH00701	3.36
Haplodrassus signifer SMNKARA08856	Haplodrassus signifer ZSMARACH00701	3.36
Haplodrassus signifer SMNKARA08973	Haplodrassus signifer ZSMARACH00701	3.36
Haplodrassus signifer ZFMKTIS7161	Haplodrassus signifer ZSMARACH00701	3.36
Haplodrassus signifer ZSMARACH00701	Haplodrassus signifer ZFMKTIS7161	3.36
Lepthyphantes minutus SMNSAran945	Lepthyphantes minutus ZSMARACH00549	3.36
Lepthyphantes minutus SMNSAranLFR089	Lepthyphantes minutus ZSMARACH00549	3.36
Lepthyphantes minutus ZSMARACH00549	Lepthyphantes minutus SMNSAranLFR089	3.36
Metellina merianae SMNSAranLFR072	Metellina merianae ZFMKTIS21376	3.36
Metellina merianae ZFMKTIS18405	Metellina merianae ZFMKTIS21376	3.36
Metellina merianae ZFMKTIS20957	Metellina merianae ZFMKTIS21376	3.36
Metellina merianae ZFMKTIS21397	Metellina merianae ZFMKTIS21376	3.36
Metellina merianae ZFMKTIS2292	Metellina merianae ZFMKTIS21376	3.36
Metellina merianae ZFMKTIS2493	Metellina merianae ZFMKTIS21376	3.36
Metellina merianae ZFMKTIS2502149	Metellina merianae ZFMKTIS21376	3.36
Metellina merianae ZFMKTIS2502552	Metellina merianae ZFMKTIS21376	3.36
Metellina merianae ZFMKTIS2502554	Metellina merianae ZFMKTIS21365	3.36
Metellina merianae ZFMKTIS2502557	Metellina merianae ZFMKTIS21376	3.36
Metellina merianae ZSMARACH00240	Metellina merianae ZFMKTIS21376	3.36
Rilaena triangularis SMNSOpil988	Rilaena triangularis SMNSOpilLFR040	3.36
Robertus lividus SMNKARA08900	Robertus lividus SMNKARA09000	3.36
Robertus lividus ZSMARACH00184	Robertus lividus SMNKARA09000	3.36
Robertus lividus ZSMARACH00592	Robertus lividus SMNKARA09000	3.36
Salticus scenicus ZFMKTIS2523248	Salticus scenicus ZFMKTIS2664	3.36
Salticus scenicus ZFMKTIS2664	Salticus scenicus ZFMKTIS4968	3.36
Salticus scenicus ZFMKTIS4968	Salticus scenicus ZFMKTIS2664	3.36
Steatoda albomaculata SMNKARA08266	Steatoda albomaculata SMNKARA08267	3.36
Steatoda albomaculata SMNKARA08268	Steatoda albomaculata SMNKARA08267	3.36
Steatoda albomaculata SMNKARA08269	Steatoda albomaculata SMNKARA08267	3.36
Theridion familiare ZFMKTIS19197	Theridion familiare ZFMKTIS2408	3.36
Theridion familiare ZFMKTIS2408	Theridion familiare ZFMKTIS19197	3.36
Xysticus kochi SMNKARA08913	Xysticus kochi ZFMKTIS2317	3.36
Xysticus kochi SMNKARA08916	Xysticus kochi ZFMKTIS2317	3.36
Xysticus kochi SMNSAran920	Xysticus kochi ZFMKTIS2317	3.36
Xysticus kochi ZFMKTIS2317	Xysticus kochi SMNSAran920	3.36
Asagena phalerata SMNKARA08261	Asagena phalerata SMNSAran993	3.21
Cyclosa conica SMNSAranLFR075	Cyclosa conica ZSMARACH00387	3.21
Cyclosa conica ZFMKTIS20934	Cyclosa conica ZFMKTIS2531773	3.21
Cyclosa conica ZFMKTIS7171	Cyclosa conica ZSMARACH00387	3.21
Cyclosa conica ZSMARACH00546	Cyclosa conica ZSMARACH00387	3.21
Dictyna arundinacea ZFMKTIS18421	Dictyna arundinacea ZSMARACH00341	3.21
Dictyna arundinacea ZSMARACH00341	Dictyna arundinacea ZFMKTIS18421	3.21
Euophrys frontalis ZFMKTIS2274	Euophrys frontalis SMNSAran943	3.21
Euophrys frontalis ZFMKTIS2504861	Euophrys frontalis SMNSAran943	3.21
Euophrys frontalis ZSMARACH00076	Euophrys frontalis SMNSAran943	3.21
Euophrys frontalis ZSMARACH00393	Euophrys frontalis SMNSAran943	3.21
Evarcha falcata ZFMKTIS2505001	Evarcha falcata SMNSAran952	3.21
Lepthyphantes minutus ZFMKTIS2517045	Lepthyphantes minutus SMNSAranLFR089	3.21
Lepthyphantes minutus ZFMKTIS7084	Lepthyphantes minutus ZSMARACH00549	3.21
Metellina merianae ZFMKTIS21358	Metellina merianae ZFMKTIS21365	3.21
Metellina merianae ZFMKTIS2502551	Metellina merianae ZFMKTIS21365	3.21
Rilaena triangularis SMNSOpil989	Rilaena triangularis ZFMKTIS2531600	3.21
Rilaena triangularis ZFMKTIS18431	Rilaena triangularis SMNSOpilLFR040	3.21
Rilaena triangularis ZFMKTIS2504992	Rilaena triangularis SMNSOpilLFR040	3.21
Robertus lividus SMNKARA08974	Robertus lividus SMNKARA09000	3.21
Robertus lividus SMNKARA09036	Robertus lividus SMNKARA09000	3.21
Xysticus kochi SMNKARA08349	Xysticus kochi ZFMKTIS2317	3.21
Xysticus kochi SMNSAran829	Xysticus kochi ZFMKTIS2317	3.21
Xysticus kochi SMNSAran830	Xysticus kochi ZFMKTIS2317	3.21
Asagena phalerata SMNKARA08259	Asagena phalerata SMNSAran993	3.06
Asagena phalerata SMNKARA08260	Asagena phalerata SMNSAran993	3.06
Asagena phalerata SMNKARA08262	Asagena phalerata SMNSAran993	3.06
Asagena phalerata SMNKARA08263	Asagena phalerata SMNSAran993	3.06
Asagena phalerata SMNKARA08264	Asagena phalerata SMNSAran993	3.06
Asagena phalerata SMNKARA08265	Asagena phalerata SMNSAran993	3.06
Asagena phalerata SMNKARA09088	Asagena phalerata SMNSAran993	3.06
Asagena phalerata SMNSAran885	Asagena phalerata SMNSAran993	3.06
Asagena phalerata SMNSAran995	Asagena phalerata SMNSAran993	3.06
Asagena phalerata ZSMARACH00559	Asagena phalerata SMNSAran993	3.06
Asagena phalerata ZSMARACH00565	Asagena phalerata SMNSAran993	3.06
Cyclosa conica SMNSAranLFR064	Cyclosa conica ZSMARACH00387	3.06
Euophrys frontalis ZSMARACH00256	Euophrys frontalis SMNSAran943	3.06
Evarcha falcata SMNKARA08194	Evarcha falcata ZFMKTIS18414	3.06
Evarcha falcata ZFMKTIS15897	Evarcha falcata SMNSAran952	3.06
Evarcha falcata ZFMKTIS4981	Evarcha falcata ZFMKTIS18414	3.06
Haplodrassus dalmatensis SMNKARA08307	Haplodrassus dalmatensis SMNKARA08315	3.06
Haplodrassus dalmatensis SMNKARA08311	Haplodrassus dalmatensis SMNKARA08315	3.06
Haplodrassus dalmatensis SMNKARA08313	Haplodrassus dalmatensis SMNKARA08315	3.06
Haplodrassus dalmatensis SMNKARA08315	Haplodrassus dalmatensis SMNKARA08313	3.06
Inermocoelotes inermis SMNKARA08389	Inermocoelotes inermis ZSMARACH00685	3.06
Inermocoelotes inermis ZSMARACH00685	Inermocoelotes inermis SMNKARA08389	3.06
Linyphia triangularis SMNSAran1096	Linyphia triangularis ZFMKTIS22241	3.06
Linyphia triangularis ZFMKTIS19122	Linyphia triangularis SMNSAran1096	3.06
Linyphia triangularis ZFMKTIS22241	Linyphia triangularis SMNSAran1096	3.06
Rilaena triangularis ZFMKTIS2472	Rilaena triangularis SMNSOpilLFR040	3.06
Rilaena triangularis ZFMKTIS2504851	Rilaena triangularis SMNSOpilLFR040	3.06
Salticus scenicus ZFMKTIS18344	Salticus scenicus ZFMKTIS4968	3.06
Salticus scenicus ZFMKTIS2374	Salticus scenicus ZFMKTIS4968	3.06
Salticus scenicus ZSMARACH00288	Salticus scenicus ZFMKTIS4968	3.06
Salticus scenicus ZSMARACH00295	Salticus scenicus ZFMKTIS4968	3.06
Xysticus kochi SMNKARA08914	Xysticus kochi ZFMKTIS2317	3.06
Xysticus kochi SMNKARA08915	Xysticus kochi SMNSAran920	3.06
Xysticus kochi ZFMKTIS2517089	Xysticus kochi SMNSAran920	3.06
Xysticus kochi ZSMARACH00084	Xysticus kochi ZFMKTIS2317	3.06
Xysticus kochi ZSMARACH00354	Xysticus kochi ZFMKTIS2317	3.06
Xysticus lanio ZFMKTIS2342	Xysticus lanio ZSMARACH00842	3.06
Xysticus lanio ZSMARACH00842	Xysticus lanio ZFMKTIS2342	3.06
