# Supplementary material for: Towards a DNA Barcode Reference Database for Spiders and Harvestmen of Germany
Source: PLoS One. 2016 Sep 28;11(9):e0162624. doi: 10.1371/journal.pone.0162624 (PMC5040438; doi:10.1371/journal.pone.0162624)
Supplement: S5 Table — This table contains the 731 pairwise comparisons with the lowest allospecific (but congeneric) p-distances in the dataset, ranging from 0 to 5%. 353 comparisons have values below 3%. Specimens are identified through species name and ID (see S1 Table for more details). (XLSX) [file pone.0162624.s011.xlsx]

## Sheet: lumps
Sequence name	Closest congeneric, interspecific match	Distance
Enoplognatha latimana ZFMKTIS2534460	Enoplognatha ovata SMNSAran1146	0
Enoplognatha latimana ZSMARACH00766	Enoplognatha ovata SMNSAran1043	0
Enoplognatha ovata SMNSAran1043	Enoplognatha latimana ZSMARACH00766	0
Enoplognatha ovata SMNSAran1146	Enoplognatha latimana ZFMKTIS2534460	0
Enoplognatha ovata SMNSAran946	Enoplognatha latimana ZFMKTIS2534460	0
Enoplognatha ovata ZFMKTIS2459	Enoplognatha latimana ZFMKTIS2534460	0
Enoplognatha ovata ZFMKTIS2516816	Enoplognatha latimana ZFMKTIS2534460	0
Enoplognatha ovata ZFMKTIS2523206	Enoplognatha latimana ZFMKTIS2534460	0
Enoplognatha ovata ZFMKTIS2524863	Enoplognatha latimana ZFMKTIS2534460	0
Enoplognatha ovata ZFMKTIS2531736	Enoplognatha latimana ZFMKTIS2534460	0
Enoplognatha ovata ZSMARACH00484	Enoplognatha latimana ZFMKTIS2534460	0
Enoplognatha ovata ZSMARACH00748	Enoplognatha latimana ZFMKTIS2534460	0
Pardosa lugubris SMNSAran856	Pardosa saltans SMNKARA09071	0
Pardosa lugubris SMNSAran860	Pardosa saltans SMNKARA09071	0
Pardosa lugubris SMNSAran887	Pardosa saltans ZFMKTIS22265	0
Pardosa lugubris ZFMKTIS18439	Pardosa saltans SMNKARA09071	0
Pardosa lugubris ZFMKTIS22278	Pardosa saltans SMNKARA09071	0
Pardosa lugubris ZFMKTIS2531735	Pardosa saltans ZFMKTIS18340	0
Pardosa lugubris ZFMKTIS2531749	Pardosa saltans ZFMKTIS18340	0
Pardosa lugubris ZFMKTIS2531765	Pardosa saltans ZFMKTIS18340	0
Pardosa saltans SMNKARA09071	Pardosa lugubris SMNSAran856	0
Pardosa saltans ZFMKTIS18340	Pardosa lugubris ZFMKTIS2531735	0
Pardosa saltans ZFMKTIS22265	Pardosa lugubris SMNSAran887	0
Pardosa saltans ZFMKTIS7107	Pardosa lugubris ZFMKTIS2531735	0
Tibellus maritimus ZSMARACH00359	Tibellus oblongus ZFMKTIS2531577	0
Tibellus maritimus ZSMARACH00759	Tibellus oblongus ZFMKTIS2531577	0
Tibellus oblongus ZFMKTIS2531577	Tibellus maritimus ZSMARACH00359	0
Xysticus audax ZSMARACH00262	Xysticus cristatus SMNKARA08204	0
Xysticus cristatus SMNKARA08204	Xysticus audax ZSMARACH00262	0
Xysticus cristatus SMNKARA08210	Xysticus audax ZSMARACH00262	0
Xysticus cristatus SMNKARA08211	Xysticus audax ZSMARACH00262	0
Xysticus cristatus SMNKARA08908	Xysticus audax ZSMARACH00262	0
Xysticus cristatus SMNKARA08911	Xysticus audax ZSMARACH00262	0
Xysticus cristatus SMNSAran1007	Xysticus audax ZSMARACH00262	0
Xysticus cristatus ZFMKTIS2528525	Xysticus audax ZSMARACH00262	0
Xysticus cristatus ZFMKTIS9636	Xysticus audax ZSMARACH00262	0
Xysticus cristatus ZSMARACH00299	Xysticus audax ZSMARACH00262	0
Xysticus cristatus ZSMARACH00353	Xysticus audax ZSMARACH00262	0
Alopecosa cuneata ZFMKTIS2420	Alopecosa pulverulenta SMNKARA08357	0.15
Alopecosa pulverulenta SMNKARA08357	Alopecosa cuneata ZFMKTIS2420	0.15
Alopecosa pulverulenta ZFMKTIS2393	Alopecosa cuneata ZFMKTIS2420	0.15
Enoplognatha latimana ZFMKTIS7194	Enoplognatha ovata ZFMKTIS2534411	0.15
Enoplognatha ovata ZFMKTIS2516815	Enoplognatha latimana ZSMARACH00766	0.15
Enoplognatha ovata ZFMKTIS2534411	Enoplognatha latimana ZFMKTIS2534460	0.15
Enoplognatha ovata ZFMKTIS2665	Enoplognatha latimana ZSMARACH00766	0.15
Enoplognatha ovata ZFMKTIS7203	Enoplognatha latimana ZFMKTIS2534460	0.15
Pardosa agrestis ZFMKTIS19077	Pardosa torrentum ZSMGBOL08323	0.15
Pardosa lugubris SMNKARA08154	Pardosa saltans ZFMKTIS18340	0.15
Pardosa lugubris SMNKARA08155	Pardosa saltans ZFMKTIS18340	0.15
Pardosa lugubris SMNKARA08157	Pardosa saltans ZFMKTIS18340	0.15
Pardosa lugubris SMNKARA08158	Pardosa saltans ZFMKTIS18340	0.15
Pardosa lugubris SMNKARA08159	Pardosa saltans ZFMKTIS18340	0.15
Pardosa lugubris SMNKARA08160	Pardosa saltans ZFMKTIS18340	0.15
Pardosa lugubris SMNKARA08162	Pardosa saltans ZFMKTIS18340	0.15
Pardosa lugubris SMNKARA08163	Pardosa saltans ZFMKTIS18340	0.15
Pardosa lugubris SMNKARA08164	Pardosa saltans ZFMKTIS18340	0.15
Pardosa lugubris SMNKARA08166	Pardosa saltans ZFMKTIS18340	0.15
Pardosa lugubris SMNKARA08168	Pardosa saltans ZFMKTIS18340	0.15
Pardosa lugubris SMNSAran1051	Pardosa saltans ZFMKTIS18340	0.15
Pardosa lugubris SMNSAran823	Pardosa saltans SMNKARA09071	0.15
Pardosa lugubris SMNSAran840	Pardosa saltans ZFMKTIS22265	0.15
Pardosa lugubris SMNSAran861	Pardosa saltans ZFMKTIS18340	0.15
Pardosa lugubris SMNSAran863	Pardosa saltans ZFMKTIS18340	0.15
Pardosa lugubris SMNSAran886	Pardosa saltans ZFMKTIS18340	0.15
Pardosa lugubris ZFMKGBOL26204	Pardosa saltans SMNKARA09071	0.15
Pardosa lugubris ZFMKTIS18381	Pardosa saltans ZFMKTIS22265	0.15
Pardosa lugubris ZFMKTIS19218	Pardosa saltans ZFMKTIS18340	0.15
Pardosa lugubris ZFMKTIS2528509	Pardosa saltans SMNKARA09071	0.15
Pardosa lugubris ZFMKTIS2531748	Pardosa saltans ZFMKTIS18340	0.15
Pardosa lugubris ZFMKTIS2638	Pardosa saltans ZFMKTIS18340	0.15
Pardosa prativaga SMNKARA08177	Pardosa riparia ZFMKTIS2677	0.15
Pardosa riparia ZFMKTIS2677	Pardosa prativaga SMNKARA08177	0.15
Pardosa saltans ZFMKTIS22349	Pardosa lugubris SMNKARA08154	0.15
Pardosa torrentum ZSMGBOL08323	Pardosa agrestis ZFMKTIS19077	0.15
Tibellus oblongus ZFMKTIS18410	Tibellus maritimus ZSMARACH00359	0.15
Xysticus audax ZFMKTIS2531604	Xysticus cristatus SMNKARA08204	0.15
Xysticus audax ZFMKTIS7152	Xysticus cristatus ZSMARACH00299	0.15
Xysticus audax ZSMARACH00261	Xysticus cristatus SMNKARA08204	0.15
Xysticus cristatus SMNSAran1150	Xysticus audax ZSMARACH00262	0.15
Xysticus cristatus ZFMKTIS2267	Xysticus audax ZSMARACH00262	0.15
Xysticus cristatus ZFMKTIS2504981	Xysticus audax ZFMKTIS2531604	0.15
Xysticus cristatus ZFMKTIS2523180	Xysticus audax ZSMARACH00262	0.15
Xysticus cristatus ZFMKTIS2528547	Xysticus audax ZSMARACH00262	0.15
Xysticus cristatus ZFMKTIS4967	Xysticus audax ZSMARACH00262	0.15
Xysticus cristatus ZFMKTIS4994	Xysticus audax ZSMARACH00262	0.15
Alopecosa pulverulenta SMNKARA08392	Alopecosa cuneata ZFMKTIS2420	0.3
Alopecosa pulverulenta SMNKARA08976	Alopecosa cuneata ZFMKTIS2420	0.3
Alopecosa pulverulenta ZFMKTIS18399	Alopecosa cuneata ZFMKTIS2420	0.3
Enoplognatha latimana ZFMKTIS2528584	Enoplognatha ovata SMNSAran1146	0.3
Enoplognatha ovata SMNSAran1044	Enoplognatha latimana ZSMARACH00766	0.3
Enoplognatha ovata SMNSAran1062	Enoplognatha latimana ZSMARACH00766	0.3
Parasteatoda simulans ZFMKTIS2531	Parasteatoda tepidariorum ZFMKTIS2523199	0.3
Parasteatoda tepidariorum ZFMKTIS2523199	Parasteatoda simulans ZFMKTIS2531	0.3
Parasteatoda tepidariorum ZFMKTIS2528299	Parasteatoda simulans ZFMKTIS2531	0.3
Parasteatoda tepidariorum ZFMKTIS2531753	Parasteatoda simulans ZFMKTIS2531	0.3
Pardosa agrestis ZFMKTIS18353	Pardosa torrentum ZSMGBOL08323	0.3
Pardosa agrestis ZFMKTIS22270	Pardosa torrentum ZSMGBOL08323	0.3
Pardosa lugubris SMNKARA08165	Pardosa saltans ZFMKTIS18340	0.3
Pardosa lugubris SMNKARA08167	Pardosa saltans ZFMKTIS18340	0.3
Pardosa lugubris SMNSAran873	Pardosa saltans ZFMKTIS18340	0.3
Pardosa lugubris SMNSAran874	Pardosa saltans ZFMKTIS18340	0.3
Pardosa lugubris ZSMGBOL08289	Pardosa saltans ZFMKTIS18340	0.3
Pardosa prativaga SMNKARA09007	Pardosa riparia ZFMKTIS2677	0.3
Pardosa prativaga ZFMKTIS19066	Pardosa riparia ZFMKTIS2677	0.3
Pardosa prativaga ZFMKTIS2355	Pardosa riparia ZFMKTIS2677	0.3
Pardosa riparia SMNSAran875	Pardosa prativaga SMNKARA08177	0.3
Pardosa riparia ZFMKTIS15922	Pardosa prativaga SMNKARA08177	0.3
Xysticus cristatus SMNKARA08205	Xysticus audax ZSMARACH00262	0.3
Alopecosa cuneata SMNKARA08192	Alopecosa pulverulenta ZSMARACH00658	0.45
Alopecosa cuneata ZFMKTIS22284	Alopecosa pulverulenta SMNKARA08357	0.45
Alopecosa pulverulenta SMNKARA08239	Alopecosa cuneata ZFMKTIS2420	0.45
Alopecosa pulverulenta SMNKARA08406	Alopecosa cuneata ZFMKTIS2420	0.45
Alopecosa pulverulenta SMNKARA08975	Alopecosa cuneata ZFMKTIS2420	0.45
Alopecosa pulverulenta SMNKARA08977	Alopecosa cuneata ZFMKTIS2420	0.45
Alopecosa pulverulenta SMNKARA08979	Alopecosa cuneata ZFMKTIS2420	0.45
Alopecosa pulverulenta ZSMARACH00658	Alopecosa cuneata SMNKARA08192	0.45
Enoplognatha latimana ZFMKTIS19220	Enoplognatha ovata SMNSAran1044	0.45
Enoplognatha latimana ZFMKTIS2645	Enoplognatha ovata SMNSAran1044	0.45
Enoplognatha ovata ZFMKGBOL26206	Enoplognatha latimana ZFMKTIS2534460	0.45
Enoplognatha ovata ZFMKTIS18451	Enoplognatha latimana ZFMKTIS2534460	0.45
Parasteatoda tepidariorum ZSMARACH00487	Parasteatoda simulans ZFMKTIS2531	0.45
Pardosa agrestis SMNKARA08225	Pardosa torrentum ZSMGBOL08323	0.45
Pardosa agrestis SMNKARA08240	Pardosa torrentum ZSMGBOL08323	0.45
Pardosa agrestis ZFMKTIS2436	Pardosa torrentum ZSMGBOL08323	0.45
Pardosa agrestis ZSMARACH00572	Pardosa torrentum ZSMGBOL08323	0.45
Pardosa lugubris SMNKARA08156	Pardosa saltans SMNKARA09071	0.45
Pardosa lugubris SMNKARA08161	Pardosa saltans SMNKARA09071	0.45
Pardosa lugubris SMNKARA08329	Pardosa saltans SMNKARA09071	0.45
Pardosa lugubris SMNSAran748	Pardosa saltans ZFMKTIS18340	0.45
Pardosa lugubris SMNSAran854	Pardosa saltans SMNKARA09071	0.45
Pardosa lugubris SMNSAran855	Pardosa saltans SMNKARA09071	0.45
Pardosa lugubris SMNSAran862	Pardosa saltans SMNKARA09071	0.45
Pardosa lugubris ZFMKTIS2523254	Pardosa saltans SMNKARA09071	0.45
Pardosa lugubris ZFMKTIS2531747	Pardosa saltans ZFMKTIS18340	0.45
Pardosa prativaga SMNKARA09051	Pardosa riparia ZFMKTIS2677	0.45
Pardosa prativaga ZFMKTIS18362	Pardosa riparia ZFMKTIS2677	0.45
Pardosa prativaga ZFMKTIS2524827	Pardosa riparia ZFMKTIS2677	0.45
Pardosa prativaga ZSMARACH00349	Pardosa riparia ZFMKTIS2677	0.45
Tibellus maritimus ZFMKTIS18495	Tibellus oblongus ZSMARACH00339	0.45
Tibellus maritimus ZFMKTIS2527	Tibellus oblongus ZSMARACH00339	0.45
Tibellus maritimus ZFMKTIS2534447	Tibellus oblongus SMNKARA08212	0.45
Tibellus oblongus SMNKARA08212	Tibellus maritimus ZFMKTIS2534447	0.45
Tibellus oblongus ZFMKTIS2278	Tibellus maritimus ZFMKTIS2534447	0.45
Tibellus oblongus ZFMKTIS2528513	Tibellus maritimus ZFMKTIS2534447	0.45
Tibellus oblongus ZFMKTIS2539	Tibellus maritimus ZFMKTIS2534447	0.45
Tibellus oblongus ZSMARACH00339	Tibellus maritimus ZFMKTIS18495	0.45
Alopecosa cuneata ZFMKTIS18400	Alopecosa pulverulenta SMNKARA08357	0.61
Alopecosa cuneata ZSMARACH00655	Alopecosa pulverulenta SMNKARA08357	0.61
Alopecosa pulverulenta SMNKARA08391	Alopecosa cuneata ZFMKTIS2420	0.61
Alopecosa pulverulenta ZFMKTIS2271	Alopecosa cuneata ZFMKTIS2420	0.61
Alopecosa pulverulenta ZFMKTIS2826	Alopecosa cuneata ZFMKTIS2420	0.61
Enoplognatha latimana ZFMKTIS2534402	Enoplognatha ovata SMNSAran1044	0.61
Parasteatoda tepidariorum ZFMKTIS2517077	Parasteatoda simulans ZFMKTIS2531	0.61
Pardosa agrestis ZFMKTIS18325	Pardosa torrentum ZSMGBOL08323	0.61
Pardosa agrestis ZFMKTIS22258	Pardosa torrentum ZSMGBOL08323	0.61
Pardosa lugubris SMNSAran826	Pardosa saltans SMNKARA09071	0.61
Pardosa lugubris SMNSAranJHS389	Pardosa saltans SMNKARA09071	0.61
Pardosa prativaga SMNKARA09070	Pardosa riparia ZFMKTIS2677	0.61
Pardosa prativaga ZFMKTIS18397	Pardosa riparia ZFMKTIS2677	0.61
Pardosa prativaga ZFMKTIS2477	Pardosa riparia ZFMKTIS2677	0.61
Pardosa prativaga ZFMKTIS2524807	Pardosa riparia ZFMKTIS2677	0.61
Pardosa prativaga ZSMARACH00348	Pardosa riparia ZFMKTIS2677	0.61
Tibellus oblongus ZFMKTIS2528514	Tibellus maritimus ZFMKTIS18495	0.61
Tibellus oblongus ZFMKTIS4973	Tibellus maritimus ZFMKTIS2534447	0.61
Tibellus oblongus ZSMARACH00338	Tibellus maritimus ZFMKTIS2534447	0.61
Alopecosa cuneata SMNKARA08893	Alopecosa pulverulenta ZFMKTIS2826	0.76
Alopecosa pulverulenta ZSMGBOL08322	Alopecosa cuneata ZFMKTIS2420	0.76
Alopecosa trabalis ZSMARACH00289	Alopecosa pulverulenta SMNKARA08392	0.76
Alopecosa trabalis ZSMARACH00847	Alopecosa pulverulenta SMNKARA08392	0.76
Pardosa prativaga SMNKARA09060	Pardosa riparia ZFMKTIS2677	0.76
Alopecosa cuneata ZSMARACH00656	Alopecosa pulverulenta SMNKARA08976	0.91
Alopecosa pulverulenta ZSMARACH00659	Alopecosa cuneata ZFMKTIS2420	0.91
Xysticus audax ZSMGBOL08288	Xysticus cristatus ZFMKTIS2296	0.91
Xysticus cristatus ZFMKTIS2296	Xysticus audax ZSMGBOL08288	0.91
Xysticus cristatus ZFMKTIS4970	Xysticus audax ZSMARACH00262	0.91
Alopecosa cuneata SMNKARA08193	Alopecosa pulverulenta SMNKARA08976	1.07
Alopecosa cuneata SMNKARA08223	Alopecosa pulverulenta SMNKARA08976	1.07
Alopecosa cuneata SMNKARA08894	Alopecosa pulverulenta SMNKARA08976	1.07
Pardosa pullata ZFMKTIS2505011	Pardosa riparia ZFMKTIS2677	1.07
Tapinocyba affinis ZFMKTIS2504911	Tapinocyba pallens ZFMKTIS2504906	1.07
Tapinocyba pallens ZFMKTIS2504906	Tapinocyba affinis ZFMKTIS2504911	1.07
Xysticus audax SMNSAran831	Xysticus cristatus ZFMKTIS2296	1.07
Alopecosa cuneata SMNKARA08222	Alopecosa pulverulenta SMNKARA08976	1.22
Alopecosa pulverulenta SMNKARA08978	Alopecosa cuneata ZFMKTIS2420	1.22
Hypomma bituberculatum ZFMKTIS18337	Hypomma fulvum ZFMKTIS18332	1.22
Hypomma bituberculatum ZFMKTIS18406	Hypomma fulvum ZFMKTIS18332	1.22
Hypomma bituberculatum ZFMKTIS22263	Hypomma fulvum ZFMKTIS18332	1.22
Hypomma bituberculatum ZSMARACH00275	Hypomma fulvum ZFMKTIS18332	1.22
Hypomma bituberculatum ZSMARACH00330	Hypomma fulvum ZFMKTIS18332	1.22
Hypomma fulvum ZFMKTIS18332	Hypomma bituberculatum ZFMKTIS18337	1.22
Hypomma fulvum ZSMARACH00327	Hypomma bituberculatum ZFMKTIS18337	1.22
Parasteatoda tepidariorum ZFMKTIS2508	Parasteatoda simulans ZFMKTIS2531	1.22
Tapinocyba affinis ZFMKTIS2504910	Tapinocyba pallens ZFMKTIS2504906	1.22
Hypomma bituberculatum ZFMKTIS19081	Hypomma fulvum ZFMKTIS18332	1.37
Hypomma bituberculatum ZFMKTIS2517383	Hypomma fulvum ZFMKTIS18332	1.37
Hypomma fulvum ZFMKTIS2829	Hypomma bituberculatum ZFMKTIS18337	1.37
Pardosa lugubris ZFMKTIS2523255	Pardosa saltans SMNKARA09071	1.37
Pardosa pullata SMNKARA08182	Pardosa riparia ZFMKTIS2677	1.37
Tapinocyba affinis ZFMKTIS22208	Tapinocyba pallens ZFMKTIS2504906	1.37
Tapinocyba affinis ZFMKTIS22209	Tapinocyba pallens ZFMKTIS2504906	1.37
Tibellus maritimus ZFMKTIS7131	Tibellus oblongus ZFMKTIS2528514	1.37
Gongylidiellum murcidum ZFMKTIS2534424	Gongylidiellum vivum ZFMKTIS19067	1.53
Gongylidiellum murcidum ZSMARACH00241	Gongylidiellum vivum ZFMKTIS19067	1.53
Gongylidiellum vivum ZFMKTIS19067	Gongylidiellum murcidum ZFMKTIS2534424	1.53
Parasteatoda tepidariorum ZFMKTIS5021	Parasteatoda simulans ZFMKTIS2531	1.53
Parasteatoda tepidariorum ZSMARACH00145	Parasteatoda simulans ZFMKTIS2531	1.53
Pardosa pullata SMNKARA08176	Pardosa riparia ZFMKTIS2677	1.53
Pardosa pullata ZFMKTIS2517366	Pardosa riparia ZFMKTIS2677	1.53
Gongylidiellum murcidum ZSMARACH00242	Gongylidiellum vivum ZFMKTIS19067	1.68
Pardosa pullata SMNKARA08169	Pardosa riparia ZFMKTIS2677	1.68
Pardosa pullata SMNKARA08183	Pardosa riparia ZFMKTIS2677	1.68
Pardosa pullata SMNKARA08185	Pardosa riparia ZFMKTIS2677	1.68
Pardosa pullata SMNKARA08186	Pardosa riparia ZFMKTIS2677	1.68
Pardosa pullata SMNKARA08242	Pardosa riparia ZFMKTIS2677	1.68
Pardosa pullata SMNKARA08393	Pardosa riparia ZFMKTIS2677	1.68
Pardosa pullata SMNSAran1089	Pardosa riparia ZFMKTIS2677	1.68
Pardosa pullata ZFMKTIS18326	Pardosa riparia ZFMKTIS2677	1.68
Pardosa pullata ZFMKTIS19330	Pardosa riparia ZFMKTIS2677	1.68
Pardosa pullata ZFMKTIS2523256	Pardosa riparia ZFMKTIS2677	1.68
Pardosa pullata ZFMKTIS2528501	Pardosa riparia ZFMKTIS2677	1.68
Pardosa pullata ZFMKTIS2825	Pardosa riparia ZFMKTIS2677	1.68
Hypomma cornutum ZSMARACH00310	Hypomma fulvum ZFMKTIS18332	1.83
Pardosa palustris ZFMKTIS2479	Pardosa agrestis ZFMKTIS2436	1.83
Pardosa pullata SMNKARA08170	Pardosa riparia ZFMKTIS2677	1.83
Pardosa pullata ZFMKTIS2699	Pardosa riparia ZFMKTIS2677	1.83
Agyneta ressli ZFMKTIS2505031	Agyneta rurestris SMNKARA08949	1.99
Agyneta rurestris SMNKARA08949	Agyneta ressli ZFMKTIS2505031	1.99
Hypomma cornutum ZFMKTIS18427	Hypomma fulvum ZFMKTIS18332	1.99
Hypomma cornutum ZFMKTIS20936	Hypomma fulvum ZFMKTIS18332	1.99
Hypomma cornutum ZFMKTIS20937	Hypomma fulvum ZFMKTIS18332	1.99
Hypomma cornutum ZFMKTIS2348	Hypomma fulvum ZFMKTIS18332	1.99
Hypomma cornutum ZFMKTIS2360	Hypomma fulvum ZFMKTIS18332	1.99
Hypomma cornutum ZFMKTIS9650	Hypomma fulvum ZFMKTIS18332	1.99
Hypomma cornutum ZSMARACH00323	Hypomma fulvum ZFMKTIS18332	1.99
Palliduphantes montanus ZFMKTIS2504950	Palliduphantes pallidus ZFMKTIS2528298	1.99
Palliduphantes pallidus ZFMKTIS2528298	Palliduphantes montanus ZFMKTIS2504950	1.99
Parasteatoda tepidariorum SMNSAranLFR018	Parasteatoda simulans ZFMKTIS2531	1.99
Parasteatoda tepidariorum ZFMKTIS20917	Parasteatoda simulans ZFMKTIS2531	1.99
Parasteatoda tepidariorum ZFMKTIS20961	Parasteatoda simulans ZFMKTIS2531	1.99
Parasteatoda tepidariorum ZFMKTIS20962	Parasteatoda simulans ZFMKTIS2531	1.99
Parasteatoda tepidariorum ZFMKTIS2466	Parasteatoda simulans ZFMKTIS2531	1.99
Parasteatoda tepidariorum ZFMKTIS2523183	Parasteatoda simulans ZFMKTIS2531	1.99
Parasteatoda tepidariorum ZFMKTIS4961	Parasteatoda simulans ZFMKTIS2531	1.99
Parasteatoda tepidariorum ZFMKTIS4975	Parasteatoda simulans ZFMKTIS2531	1.99
Parasteatoda tepidariorum ZFMKTIS5029	Parasteatoda simulans ZFMKTIS2531	1.99
Parasteatoda tepidariorum ZSMARACH00146	Parasteatoda simulans ZFMKTIS2531	1.99
Pardosa monticola ZSMARACH00835	Pardosa agrestis ZFMKTIS2436	1.99
Pardosa palustris SMNKARA08141	Pardosa agrestis ZFMKTIS2436	1.99
Pardosa palustris SMNKARA08143	Pardosa agrestis ZFMKTIS2436	1.99
Pardosa palustris SMNKARA08144	Pardosa agrestis ZFMKTIS2436	1.99
Pardosa palustris SMNKARA08145	Pardosa agrestis ZFMKTIS2436	1.99
Pardosa palustris SMNKARA08148	Pardosa agrestis ZFMKTIS2436	1.99
Pardosa palustris SMNKARA08150	Pardosa agrestis ZFMKTIS2436	1.99
Pardosa palustris ZFMKTIS18355	Pardosa agrestis ZFMKTIS2436	1.99
Pardosa palustris ZFMKTIS18398	Pardosa agrestis ZFMKTIS2436	1.99
Pardosa palustris ZFMKTIS22271	Pardosa agrestis ZFMKTIS2436	1.99
Pardosa palustris ZSMARACH00465	Pardosa agrestis ZFMKTIS2436	1.99
Pardosa palustris ZSMARACH00717	Pardosa agrestis ZFMKTIS2436	1.99
Pardosa pullata SMNKARA08178	Pardosa riparia ZFMKTIS2677	1.99
Pardosa pullata SMNKARA08179	Pardosa riparia ZFMKTIS2677	1.99
Pardosa pullata SMNKARA08184	Pardosa riparia ZFMKTIS2677	1.99
Pardosa pullata ZFMKTIS7208	Pardosa riparia ZFMKTIS2677	1.99
Agyneta rurestris ZFMKTIS18460	Agyneta ressli ZFMKTIS2505031	2.14
Palliduphantes pallidus SMNKARA08817	Palliduphantes montanus ZFMKTIS2504950	2.14
Palliduphantes pallidus SMNKARA08934	Palliduphantes montanus ZFMKTIS2504950	2.14
Parasteatoda tepidariorum ZFMKTIS7033	Parasteatoda simulans ZFMKTIS2531	2.14
Pardosa palustris SMNKARA08138	Pardosa torrentum ZSMGBOL08323	2.14
Pardosa palustris SMNKARA08140	Pardosa torrentum ZSMGBOL08323	2.14
Pardosa palustris SMNKARA08142	Pardosa torrentum ZSMGBOL08323	2.14
Pardosa palustris SMNKARA08151	Pardosa torrentum ZSMGBOL08323	2.14
Pardosa palustris SMNKARA08152	Pardosa torrentum ZSMGBOL08323	2.14
Pardosa palustris SMNKARA08153	Pardosa torrentum ZSMGBOL08323	2.14
Pardosa palustris SMNKARA08187	Pardosa torrentum ZSMGBOL08323	2.14
Pardosa pullata SMNSAran1091	Pardosa riparia ZFMKTIS2677	2.14
Tapinocyba pallens ZFMKTIS2504907	Tapinocyba affinis ZFMKTIS2504910	2.14
Agyneta rurestris SMNKARA08952	Agyneta ressli ZFMKTIS2505031	2.29
Agyneta rurestris SMNSAran1119	Agyneta ressli ZFMKTIS2505031	2.29
Hypomma cornutum ZFMKTIS2504858	Hypomma fulvum ZFMKTIS18332	2.29
Micrargus apertus SMNKARA08957	Micrargus georgescuae ZFMKTIS2504925	2.29
Micrargus georgescuae ZFMKTIS2504925	Micrargus apertus SMNKARA08957	2.29
Palliduphantes pallidus SMNKARA08940	Palliduphantes montanus ZFMKTIS2504950	2.29
Pardosa blanda ZFMKTIS19223	Pardosa monticola ZSMARACH00835	2.29
Pardosa palustris SMNKARA08147	Pardosa torrentum ZSMGBOL08323	2.29
Porrhomma convexum ZFMKTIS2501435	Porrhomma pygmaeum ZFMKTIS18457	2.29
Porrhomma convexum ZFMKTIS2501614	Porrhomma pygmaeum ZFMKTIS18457	2.29
Porrhomma pygmaeum ZFMKTIS18457	Porrhomma convexum ZFMKTIS2501435	2.29
Porrhomma pygmaeum ZFMKTIS2524795	Porrhomma convexum ZFMKTIS2501435	2.29
Porrhomma pygmaeum ZFMKTIS2815	Porrhomma convexum ZFMKTIS2501435	2.29
Porrhomma pygmaeum ZSMARACH00176	Porrhomma convexum ZFMKTIS2501435	2.29
Porrhomma pygmaeum ZSMARACH00177	Porrhomma convexum ZFMKTIS2501435	2.29
Agyneta rurestris SMNKARA08935	Agyneta ressli ZFMKTIS2505031	2.45
Agyneta rurestris SMNKARA08936	Agyneta ressli ZFMKTIS2505031	2.45
Agyneta rurestris SMNKARA08937	Agyneta ressli ZFMKTIS2505031	2.45
Agyneta rurestris SMNKARA08950	Agyneta ressli ZFMKTIS2505031	2.45
Agyneta rurestris ZFMKTIS18461	Agyneta ressli ZFMKTIS2505031	2.45
Agyneta rurestris ZFMKTIS2048	Agyneta ressli ZFMKTIS2505031	2.45
Erigone atra ZFMKTIS20913	Erigone dentipalpis ZFMKTIS18339	2.45
Erigone atra ZFMKTIS2523188	Erigone dentipalpis ZFMKTIS18339	2.45
Erigone dentipalpis ZFMKTIS18339	Erigone atra ZFMKTIS20913	2.45
Micrargus georgescuae ZFMKTIS2504926	Micrargus apertus SMNKARA08957	2.45
Palliduphantes pallidus ZSMARACH00509	Palliduphantes montanus ZFMKTIS2504950	2.45
Pardosa blanda ZFMKTIS2649	Pardosa monticola ZSMARACH00835	2.45
Porrhomma pygmaeum ZFMKTIS19082	Porrhomma convexum ZFMKTIS2501435	2.45
Porrhomma pygmaeum ZFMKTIS21412	Porrhomma convexum ZFMKTIS2501435	2.45
Porrhomma pygmaeum ZFMKTIS22190	Porrhomma convexum ZFMKTIS2501435	2.45
Porrhomma pygmaeum ZFMKTIS2517379	Porrhomma convexum ZFMKTIS2501435	2.45
Porrhomma pygmaeum ZFMKTIS2524814	Porrhomma convexum ZFMKTIS2501435	2.45
Zelotes clivicola SMNKARA08859	Zelotes latreillei ZFMKTIS4992	2.45
Zelotes clivicola ZFMKTIS2524796	Zelotes latreillei ZFMKTIS4992	2.45
Zelotes latreillei ZFMKTIS4992	Zelotes clivicola SMNKARA08859	2.45
Agyneta rurestris SMNKARA08951	Agyneta ressli ZFMKTIS2505031	2.6
Agyneta rurestris ZFMKTIS2523222	Agyneta ressli ZFMKTIS2505031	2.6
Agyneta rurestris ZFMKTIS2524886	Agyneta ressli ZFMKTIS2505031	2.6
Agyneta rurestris ZFMKTIS2534396	Agyneta ressli ZFMKTIS2505031	2.6
Agyneta rurestris ZFMKTIS7073	Agyneta ressli ZFMKTIS2505031	2.6
Agyneta rurestris ZSMARACH00156	Agyneta ressli ZFMKTIS2505031	2.6
Agyneta rurestris ZSMARACH00157	Agyneta ressli ZFMKTIS2505031	2.6
Hypomma cornutum ZFMKTIS2504999	Hypomma fulvum ZFMKTIS18332	2.6
Micrargus georgescuae ZFMKTIS22211	Micrargus apertus SMNKARA08957	2.6
Pardosa mixta ZFMKTIS2682	Pardosa monticola ZSMARACH00835	2.6
Silometopus elegans ZFMKTIS2413	Silometopus reussi ZFMKTIS18328	2.6
Silometopus elegans ZSMARACH00477	Silometopus reussi ZFMKTIS18328	2.6
Silometopus reussi ZFMKTIS18328	Silometopus elegans ZFMKTIS2413	2.6
Zelotes clivicola SMNKARA08409	Zelotes latreillei ZFMKTIS4992	2.6
Zelotes clivicola ZFMKTIS7209	Zelotes latreillei ZFMKTIS4992	2.6
Agyneta rurestris ZFMKTIS2526	Agyneta ressli ZFMKTIS2505031	2.75
Erigone arctica ZFMKTIS2315	Erigone atra ZFMKTIS20913	2.75
Palliduphantes pallidus ZSMARACH00693	Palliduphantes montanus ZFMKTIS2504950	2.75
Pardosa mixta ZFMKTIS2654	Pardosa monticola ZSMARACH00835	2.75
Pardosa oreophila ZFMKTIS4944	Pardosa monticola ZSMARACH00835	2.75
Pardosa pullata SMNSAran1085	Pardosa riparia ZFMKTIS2677	2.75
Porrhomma convexum ZFMKTIS22186	Porrhomma pygmaeum ZFMKTIS18457	2.75
Porrhomma convexum ZFMKTIS2501439	Porrhomma pygmaeum ZFMKTIS18457	2.75
Porrhomma convexum ZFMKTIS2501440	Porrhomma pygmaeum ZFMKTIS18457	2.75
Porrhomma convexum ZFMKTIS2501606	Porrhomma pygmaeum ZFMKTIS18457	2.75
Porrhomma convexum ZFMKTIS2501607	Porrhomma pygmaeum ZFMKTIS18457	2.75
Porrhomma convexum ZFMKTIS2823	Porrhomma pygmaeum ZFMKTIS18457	2.75
Silometopus reussi ZFMKTIS22260	Silometopus elegans ZFMKTIS2413	2.75
Zelotes latreillei ZFMKTIS7018	Zelotes clivicola SMNKARA08859	2.75
Zelotes latreillei ZFMKTIS7101	Zelotes clivicola SMNKARA08859	2.75
Alopecosa taeniata ZFMKTIS2679	Alopecosa trabalis ZSMARACH00847	2.9
Dicymbium nigrum SMNKARA09057	Dicymbium tibiale ZFMKTIS18349	2.9
Dicymbium tibiale ZFMKTIS18349	Dicymbium nigrum SMNKARA09057	2.9
Pardosa monticola ZFMKTIS2524839	Pardosa blanda ZFMKTIS19223	2.9
Pardosa monticola ZFMKTIS2534450	Pardosa blanda ZFMKTIS19223	2.9
Pardosa monticola ZFMKTIS2534451	Pardosa blanda ZFMKTIS19223	2.9
Pardosa oreophila ZFMKTIS2651	Pardosa monticola ZSMARACH00835	2.9
Pardosa oreophila ZFMKTIS2656	Pardosa monticola ZSMARACH00835	2.9
Pocadicnemis juncea ZSMARACH00727	Pocadicnemis pumila ZFMKTIS2506	2.9
Pocadicnemis juncea ZSMARACH00728	Pocadicnemis pumila ZFMKTIS2506	2.9
Pocadicnemis pumila ZFMKTIS2506	Pocadicnemis juncea ZSMARACH00727	2.9
Zelotes latreillei SMNKARA08858	Zelotes clivicola SMNKARA08859	2.9
Zelotes latreillei ZFMKTIS2528588	Zelotes clivicola SMNKARA08859	2.9
Alopecosa taeniata ZFMKTIS2674	Alopecosa trabalis ZSMARACH00847	3.06
Dicymbium nigrum SMNKARA09075	Dicymbium tibiale ZFMKTIS18349	3.06
Palliduphantes pallidus SMNKARA08816	Palliduphantes montanus ZFMKTIS2504950	3.06
Palliduphantes pallidus ZFMKTIS2501609	Palliduphantes montanus ZFMKTIS2504950	3.06
Pardosa monticola ZFMKTIS19079	Pardosa blanda ZFMKTIS19223	3.06
Pardosa paludicola ZSMARACH00499	Pardosa lugubris ZFMKTIS2523255	3.06
Pardosa paludicola ZSMARACH00657	Pardosa lugubris ZFMKTIS2523255	3.06
Pocadicnemis pumila ZFMKTIS7109	Pocadicnemis juncea ZSMARACH00727	3.06
Pocadicnemis pumila ZFMKTIS7134	Pocadicnemis juncea ZSMARACH00727	3.06
Zelotes latreillei SMNKARA09062	Zelotes clivicola SMNKARA08859	3.06
Alopecosa fabrilis SMNKARA08236	Alopecosa striatipes SMNKARA08234	3.21
Alopecosa striatipes SMNKARA08234	Alopecosa fabrilis SMNKARA08236	3.21
Alopecosa striatipes SMNKARA08235	Alopecosa fabrilis SMNKARA08236	3.21
Alopecosa taeniata SMNSAran987	Alopecosa trabalis ZSMARACH00847	3.21
Dicymbium nigrum ZFMKTIS2528506	Dicymbium tibiale ZFMKTIS18349	3.21
Dicymbium nigrum ZSMARACH00626	Dicymbium tibiale ZFMKTIS18349	3.21
Dicymbium tibiale ZFMKTIS22268	Dicymbium nigrum SMNKARA09057	3.21
Oedothorax apicatus ZSMARACH00497	Oedothorax retusus ZFMKGBOL26222	3.21
Oedothorax retusus ZFMKGBOL26222	Oedothorax apicatus ZSMARACH00497	3.21
Pardosa amentata ZFMKTIS2505034	Pardosa lugubris SMNSAran1051	3.21
Pocadicnemis pumila SMNKARA08938	Pocadicnemis juncea ZSMARACH00727	3.21
Robertus arundineti ZFMKTIS18376	Robertus lividus SMNSAran1109	3.21
Robertus arundineti ZFMKTIS2504982	Robertus lividus SMNSAran1109	3.21
Robertus arundineti ZFMKTIS2528551	Robertus lividus SMNSAran1109	3.21
Robertus lividus SMNSAran1109	Robertus arundineti ZFMKTIS18376	3.21
Xysticus gallicus ZFMKTIS2680	Xysticus kochi ZSMARACH00382	3.21
Xysticus kochi ZSMARACH00382	Xysticus gallicus ZFMKTIS2680	3.21
Alopecosa striatipes SMNKARA08224	Alopecosa fabrilis SMNKARA08236	3.36
Dolomedes fimbriatus ZFMKTIS2524803	Dolomedes plantarius ZSMGBOL04168	3.36
Dolomedes fimbriatus ZFMKTIS2534438	Dolomedes plantarius ZSMGBOL04168	3.36
Dolomedes fimbriatus ZFMKTIS5013	Dolomedes plantarius ZSMGBOL04168	3.36
Dolomedes plantarius ZSMGBOL04168	Dolomedes fimbriatus ZFMKTIS2524803	3.36
Gonatium rubellum ZSMARACH00563	Gonatium rubens ZSMARACH00225	3.36
Gonatium rubens ZSMARACH00225	Gonatium rubellum ZSMARACH00563	3.36
Oedothorax apicatus ZFMKTIS18472	Oedothorax retusus ZFMKGBOL26222	3.36
Oedothorax apicatus ZFMKTIS22187	Oedothorax retusus ZFMKGBOL26222	3.36
Oedothorax apicatus ZFMKTIS2641	Oedothorax retusus ZFMKGBOL26222	3.36
Oedothorax apicatus ZFMKTIS2822	Oedothorax retusus ZFMKGBOL26222	3.36
Oedothorax apicatus ZFMKTIS7192	Oedothorax retusus ZFMKGBOL26222	3.36
Oedothorax apicatus ZSMARACH00456	Oedothorax retusus ZFMKGBOL26222	3.36
Oedothorax retusus ZFMKTIS2494	Oedothorax apicatus ZFMKTIS18472	3.36
Oedothorax retusus ZFMKTIS2516827	Oedothorax apicatus ZFMKTIS18472	3.36
Oedothorax retusus ZFMKTIS2516898	Oedothorax apicatus ZFMKTIS18472	3.36
Oedothorax retusus ZFMKTIS2534432	Oedothorax apicatus ZFMKTIS18472	3.36
Oedothorax retusus ZSMARACH00482	Oedothorax apicatus ZFMKTIS18472	3.36
Pardosa amentata SMNSAran1094	Pardosa lugubris SMNSAran855	3.36
Pardosa amentata ZFMKTIS22185	Pardosa lugubris SMNSAran1051	3.36
Pardosa amentata ZFMKTIS2824	Pardosa lugubris SMNSAran1051	3.36
Robertus lividus SMNKARA09000	Robertus arundineti ZFMKTIS18376	3.36
Xysticus kochi SMNSAran820	Xysticus cristatus ZFMKTIS2296	3.36
Dicymbium nigrum ZFMKTIS18335	Dicymbium tibiale ZFMKTIS18349	3.52
Dolomedes fimbriatus ZFMKTIS18392	Dolomedes plantarius ZSMGBOL04168	3.52
Dolomedes fimbriatus ZFMKTIS18393	Dolomedes plantarius ZSMGBOL04168	3.52
Dolomedes fimbriatus ZSMARACH00506	Dolomedes plantarius ZSMGBOL04168	3.52
Dolomedes fimbriatus ZSMARACH00507	Dolomedes plantarius ZSMGBOL04168	3.52
Micrargus herbigradus ZFMKTIS2504903	Micrargus georgescuae ZFMKTIS2504925	3.52
Micrargus herbigradus ZFMKTIS2528577	Micrargus georgescuae ZFMKTIS2504925	3.52
Micrargus herbigradus ZFMKTIS7058	Micrargus georgescuae ZFMKTIS2504925	3.52
Micrargus herbigradus ZSMARACH00210	Micrargus georgescuae ZFMKTIS2504925	3.52
Oedothorax apicatus ZFMKTIS2534418	Oedothorax retusus ZFMKGBOL26222	3.52
Oedothorax retusus ZFMKTIS22184	Oedothorax apicatus ZFMKTIS18472	3.52
Oedothorax retusus ZFMKTIS2528505	Oedothorax apicatus ZFMKTIS18472	3.52
Ozyptila simplex SMNKARA09020	Ozyptila trux ZSMARACH00597	3.52
Ozyptila trux ZSMARACH00597	Ozyptila simplex SMNKARA09020	3.52
Pardosa amentata SMNSAran1008	Pardosa monticola ZSMARACH00835	3.52
Pardosa amentata SMNSAran1090	Pardosa monticola ZSMARACH00835	3.52
Pardosa amentata SMNSAran799	Pardosa monticola ZSMARACH00835	3.52
Pardosa amentata ZFMKTIS15919	Pardosa lugubris SMNSAran1051	3.52
Pardosa amentata ZFMKTIS19225	Pardosa monticola ZSMARACH00835	3.52
Pardosa amentata ZFMKTIS2415	Pardosa lugubris SMNSAran1051	3.52
Pardosa amentata ZFMKTIS2524826	Pardosa monticola ZSMARACH00835	3.52
Pardosa amentata ZFMKTIS7116	Pardosa lugubris SMNSAran1051	3.52
Trochosa spinipalpis ZFMKTIS2392	Trochosa terricola SMNKARA08398	3.52
Trochosa spinipalpis ZSMARACH00194	Trochosa terricola SMNKARA08398	3.52
Trochosa spinipalpis ZSMARACH00228	Trochosa terricola SMNKARA08398	3.52
Trochosa terricola SMNKARA08398	Trochosa spinipalpis ZFMKTIS2392	3.52
Trochosa terricola ZSMARACH00623	Trochosa spinipalpis ZFMKTIS2392	3.52
Xysticus kochi SMNKARA08912	Xysticus cristatus ZFMKTIS2296	3.52
Xysticus kochi ZSMGBOL08339	Xysticus cristatus ZFMKTIS2296	3.52
Zelotes longipes SMNKARA08323	Zelotes petrensis SMNSAran827	3.52
Zelotes longipes SMNKARA08324	Zelotes petrensis SMNSAran827	3.52
Zelotes petrensis SMNSAran827	Zelotes longipes SMNKARA08323	3.52
Zelotes petrensis ZFMKTIS2517369	Zelotes longipes SMNKARA08323	3.52
Zelotes petrensis ZFMKTIS2534421	Zelotes longipes SMNKARA08323	3.52
Zelotes petrensis ZSMARACH00219	Zelotes longipes SMNKARA08323	3.52
Zelotes petrensis ZSMARACH00725	Zelotes longipes SMNKARA08323	3.52
Zelotes subterraneus SMNKARA09034	Zelotes latreillei SMNKARA08858	3.52
Araeoncus anguineus ZFMKTIS15924	Araeoncus crassiceps ZFMKTIS19069	3.67
Araeoncus crassiceps ZFMKTIS19069	Araeoncus anguineus ZFMKTIS15924	3.67
Dolomedes fimbriatus SMNSAran759	Dolomedes plantarius ZSMGBOL04168	3.67
Dolomedes fimbriatus ZFMKTIS2528583	Dolomedes plantarius ZSMGBOL04168	3.67
Micrargus herbigradus SMNKARA08953	Micrargus georgescuae ZFMKTIS2504925	3.67
Micrargus herbigradus SMNKARA08958	Micrargus georgescuae ZFMKTIS2504925	3.67
Micrargus herbigradus ZFMKTIS19114	Micrargus georgescuae ZFMKTIS2504925	3.67
Micrargus herbigradus ZFMKTIS22210	Micrargus georgescuae ZFMKTIS2504925	3.67
Micrargus herbigradus ZFMKTIS2517082	Micrargus georgescuae ZFMKTIS2504925	3.67
Micrargus herbigradus ZFMKTIS2523214	Micrargus georgescuae ZFMKTIS2504925	3.67
Micrargus herbigradus ZFMKTIS2754	Micrargus georgescuae ZFMKTIS2504925	3.67
Micrargus herbigradus ZSMARACH00209	Micrargus georgescuae ZFMKTIS2504925	3.67
Oedothorax apicatus ZFMKTIS1994	Oedothorax retusus ZFMKGBOL26222	3.67
Oedothorax retusus ZFMKTIS2827	Oedothorax apicatus ZFMKTIS18472	3.67
Ozyptila trux ZFMKTIS2523245	Ozyptila simplex SMNKARA09020	3.67
Ozyptila trux ZSMARACH00694	Ozyptila simplex SMNKARA09020	3.67
Pardosa amentata SMNSAran1001	Pardosa monticola ZSMARACH00835	3.67
Pardosa amentata SMNSAran1087	Pardosa lugubris SMNSAran855	3.67
Pardosa amentata SMNSAran1088	Pardosa monticola ZSMARACH00835	3.67
Pardosa amentata SMNSAran1093	Pardosa lugubris SMNSAran1051	3.67
Pardosa amentata SMNSAran994	Pardosa monticola ZSMARACH00835	3.67
Pardosa amentata SMNSAran999	Pardosa monticola ZSMARACH00835	3.67
Pardosa amentata ZFMKTIS2475	Pardosa lugubris SMNSAran1051	3.67
Pardosa amentata ZFMKTIS2504859	Pardosa monticola ZSMARACH00835	3.67
Pardosa amentata ZFMKTIS2504860	Pardosa monticola ZSMARACH00835	3.67
Pardosa amentata ZFMKTIS2639	Pardosa lugubris SMNSAran1051	3.67
Pardosa amentata ZFMKTIS2653	Pardosa monticola ZSMARACH00835	3.67
Pardosa amentata ZFMKTIS4979	Pardosa lugubris SMNSAran1051	3.67
Pardosa amentata ZSMARACH00421	Pardosa lugubris SMNSAran1051	3.67
Pardosa amentata ZSMARACH00422	Pardosa lugubris SMNSAran1051	3.67
Pardosa nigriceps ZFMKTIS18486	Pardosa monticola ZSMARACH00835	3.67
Robertus lividus SMNKARA09036	Robertus arundineti ZFMKTIS18376	3.67
Trochosa spinipalpis SMNKARA08402	Trochosa terricola SMNKARA08220	3.67
Trochosa spinipalpis ZFMKTIS19335	Trochosa terricola SMNKARA08220	3.67
Trochosa terricola SMNKARA08220	Trochosa spinipalpis SMNKARA08402	3.67
Trochosa terricola SMNKARA08221	Trochosa spinipalpis SMNKARA08402	3.67
Trochosa terricola SMNKARA08395	Trochosa spinipalpis SMNKARA08402	3.67
Trochosa terricola SMNKARA08399	Trochosa spinipalpis SMNKARA08402	3.67
Trochosa terricola SMNKARA08403	Trochosa spinipalpis SMNKARA08402	3.67
Trochosa terricola ZFMKTIS2505023	Trochosa spinipalpis ZFMKTIS2392	3.67
Trochosa terricola ZFMKTIS7080	Trochosa spinipalpis SMNKARA08402	3.67
Trochosa terricola ZSMARACH00624	Trochosa spinipalpis SMNKARA08402	3.67
Xysticus kochi SMNKARA08915	Xysticus gallicus ZFMKTIS2680	3.67
Xysticus kochi ZFMKTIS2517089	Xysticus cristatus ZFMKTIS2296	3.67
Zelotes longipes SMNKARA08322	Zelotes petrensis SMNSAran827	3.67
Zelotes longipes ZSMARACH00548	Zelotes petrensis SMNSAran827	3.67
Zelotes petrensis SMNKARA08857	Zelotes longipes SMNKARA08323	3.67
Alopecosa fabrilis SMNKARA08327	Alopecosa schmidti ZSMARACH00571	3.82
Alopecosa fabrilis ZSMARACH00475	Alopecosa striatipes SMNKARA08234	3.82
Alopecosa schmidti ZSMARACH00571	Alopecosa fabrilis SMNKARA08327	3.82
Dolomedes fimbriatus ZFMKTIS4952	Dolomedes plantarius ZSMGBOL04168	3.82
Dolomedes fimbriatus ZSMGBOL08283	Dolomedes plantarius ZSMGBOL04168	3.82
Dolomedes plantarius ZSMGBOL04169	Dolomedes fimbriatus ZFMKTIS2524803	3.82
Gonatium rubellum ZFMKTIS20947	Gonatium rubens ZFMKTIS19113	3.82
Gonatium rubellum ZFMKTIS20948	Gonatium rubens ZFMKTIS19113	3.82
Gonatium rubens ZFMKTIS19113	Gonatium rubellum ZFMKTIS20947	3.82
Gonatium rubens ZFMKTIS7051	Gonatium rubellum ZFMKTIS20947	3.82
Oedothorax retusus ZFMKTIS2528504	Oedothorax apicatus ZFMKTIS18472	3.82
Ozyptila trux ZFMKTIS2412	Ozyptila simplex SMNKARA09020	3.82
Ozyptila trux ZFMKTIS7070	Ozyptila simplex SMNKARA09020	3.82
Pardosa amentata SMNKARA08241	Pardosa monticola ZSMARACH00835	3.82
Pardosa amentata SMNSAran1092	Pardosa monticola ZSMARACH00835	3.82
Pardosa amentata ZFMKTIS2505033	Pardosa monticola ZSMARACH00835	3.82
Pardosa amentata ZSMGBOL08312	Pardosa monticola ZSMARACH00835	3.82
Pardosa hortensis SMNKARA08171	Pardosa lugubris SMNSAran1051	3.82
Robertus lividus SMNKARA08974	Robertus arundineti ZFMKTIS18376	3.82
Robertus lividus ZSMARACH00184	Robertus arundineti ZFMKTIS18376	3.82
Robertus lividus ZSMARACH00592	Robertus arundineti ZFMKTIS18376	3.82
Titanoeca psammophila SMNKARA08304	Titanoeca quadriguttata ZFMKTIS2517370	3.82
Titanoeca quadriguttata ZFMKTIS2517370	Titanoeca psammophila SMNKARA08304	3.82
Trochosa terricola SMNKARA08394	Trochosa spinipalpis SMNKARA08402	3.82
Walckenaeria corniculans ZFMKTIS2523226	Walckenaeria monoceros ZSMARACH00625	3.82
Walckenaeria corniculans ZFMKTIS7185	Walckenaeria monoceros ZSMARACH00625	3.82
Walckenaeria corniculans ZSMARACH00179	Walckenaeria monoceros ZSMARACH00625	3.82
Walckenaeria monoceros ZSMARACH00625	Walckenaeria corniculans ZFMKTIS2523226	3.82
Zelotes subterraneus SMNSAranLFR066	Zelotes latreillei SMNKARA08858	3.82
Zelotes subterraneus ZFMKTIS20905	Zelotes latreillei SMNKARA08858	3.82
Zelotes subterraneus ZSMARACH00511	Zelotes latreillei SMNKARA08858	3.82
Zelotes subterraneus ZSMARACH00526	Zelotes latreillei SMNKARA08858	3.82
Gonatium rubellum ZFMKTIS2516900	Gonatium rubens ZSMARACH00225	3.98
Oedothorax retusus ZSMARACH00346	Oedothorax apicatus ZFMKTIS18472	3.98
Pardosa morosa ZFMKTIS16990	Pardosa monticola ZSMARACH00835	3.98
Pardosa morosa ZFMKTIS5028	Pardosa monticola ZSMARACH00835	3.98
Philodromus aureolus SMNSAran1124	Philodromus collinus SMNSAran1031	3.98
Philodromus collinus SMNSAran1031	Philodromus aureolus SMNSAran1124	3.98
Philodromus collinus ZFMKTIS18437	Philodromus aureolus SMNSAran1124	3.98
Philodromus collinus ZFMKTIS18501	Philodromus aureolus SMNSAran1124	3.98
Philodromus collinus ZFMKTIS2450	Philodromus aureolus SMNSAran1124	3.98
Philodromus collinus ZFMKTIS2483	Philodromus aureolus SMNSAran1124	3.98
Philodromus collinus ZFMKTIS2524865	Philodromus aureolus SMNSAran1124	3.98
Philodromus collinus ZFMKTIS2528539	Philodromus aureolus SMNSAran1124	3.98
Philodromus collinus ZFMKTIS2528550	Philodromus aureolus SMNSAran1124	3.98
Philodromus collinus ZFMKTIS2531603	Philodromus aureolus SMNSAran1124	3.98
Philodromus collinus ZFMKTIS2531776	Philodromus aureolus SMNSAran1124	3.98
Philodromus collinus ZFMKTIS2534453	Philodromus aureolus SMNSAran1124	3.98
Philodromus praedatus ZFMKTIS19111	Philodromus aureolus SMNSAran1124	3.98
Philodromus praedatus ZFMKTIS2522	Philodromus aureolus SMNSAran1124	3.98
Robertus lividus SMNKARA08900	Robertus arundineti ZFMKTIS18376	3.98
Robertus lividus ZFMKTIS18350	Robertus arundineti ZFMKTIS18376	3.98
Robertus lividus ZFMKTIS18378	Robertus arundineti ZFMKTIS18376	3.98
Robertus lividus ZFMKTIS22277	Robertus arundineti ZFMKTIS18376	3.98
Robertus lividus ZFMKTIS2749	Robertus arundineti ZFMKTIS18376	3.98
Robertus lividus ZFMKTIS7175	Robertus arundineti ZFMKTIS18376	3.98
Robertus lividus ZSMGBOL08338	Robertus arundineti ZFMKTIS18376	3.98
Titanoeca psammophila SMNKARA08290	Titanoeca quadriguttata ZFMKTIS2517370	3.98
Titanoeca psammophila SMNKARA08291	Titanoeca quadriguttata ZFMKTIS2517370	3.98
Titanoeca psammophila SMNKARA08292	Titanoeca quadriguttata ZFMKTIS2517370	3.98
Titanoeca psammophila SMNKARA08293	Titanoeca quadriguttata ZFMKTIS2517370	3.98
Titanoeca psammophila SMNKARA08294	Titanoeca quadriguttata ZFMKTIS2517370	3.98
Titanoeca psammophila SMNKARA08295	Titanoeca quadriguttata ZFMKTIS2517370	3.98
Titanoeca psammophila SMNKARA08296	Titanoeca quadriguttata ZFMKTIS2517370	3.98
Titanoeca psammophila SMNKARA08297	Titanoeca quadriguttata ZFMKTIS2517370	3.98
Titanoeca psammophila SMNKARA08298	Titanoeca quadriguttata ZFMKTIS2517370	3.98
Titanoeca psammophila SMNKARA08299	Titanoeca quadriguttata ZFMKTIS2517370	3.98
Titanoeca psammophila SMNKARA08300	Titanoeca quadriguttata ZFMKTIS2517370	3.98
Titanoeca psammophila SMNKARA08301	Titanoeca quadriguttata ZFMKTIS2517370	3.98
Titanoeca quadriguttata SMNSAran883	Titanoeca psammophila SMNKARA08304	3.98
Walckenaeria corniculans SMNKARA9340	Walckenaeria monoceros ZSMARACH00625	3.98
Walckenaeria corniculans ZFMKTIS2523201	Walckenaeria monoceros ZSMARACH00625	3.98
Walckenaeria corniculans ZSMARACH00180	Walckenaeria monoceros ZSMARACH00625	3.98
Xysticus kochi SMNKARA08916	Xysticus audax SMNSAran831	3.98
Xysticus kochi ZFMKTIS2317	Xysticus cristatus ZFMKTIS2296	3.98
Araeoncus crassiceps ZFMKTIS19203	Araeoncus anguineus ZFMKTIS15924	4.13
Araeoncus crassiceps ZFMKTIS2432	Araeoncus anguineus ZFMKTIS15924	4.13
Gonatium rubellum ZFMKTIS2516892	Gonatium rubens ZSMARACH00225	4.13
Gonatium rubens ZFMKTIS2516836	Gonatium rubellum ZSMARACH00563	4.13
Micrargus herbigradus SMNKARA08955	Micrargus georgescuae ZFMKTIS2504925	4.13
Micrargus herbigradus ZFMKTIS2517085	Micrargus georgescuae ZFMKTIS2504925	4.13
Pardosa bifasciata SMNKARA09086	Pardosa monticola ZSMARACH00835	4.13
Pardosa bifasciata SMNSAran901	Pardosa monticola ZSMARACH00835	4.13
Philodromus collinus SMNSAranLFR098	Philodromus aureolus SMNSAran1124	4.13
Philodromus collinus ZFMKTIS18470	Philodromus aureolus SMNSAran1124	4.13
Philodromus collinus ZFMKTIS2531594	Philodromus aureolus SMNSAran1124	4.13
Philodromus collinus ZFMKTIS7135	Philodromus aureolus SMNSAran1124	4.13
Titanoeca quadriguttata SMNSAran882	Titanoeca psammophila SMNKARA08304	4.13
Titanoeca quadriguttata SMNSAran902	Titanoeca psammophila SMNKARA08304	4.13
Titanoeca quadriguttata SMNSAran903	Titanoeca psammophila SMNKARA08304	4.13
Titanoeca quadriguttata SMNSAran904	Titanoeca psammophila SMNKARA08304	4.13
Titanoeca quadriguttata SMNSAran907	Titanoeca psammophila SMNKARA08304	4.13
Titanoeca quadriguttata SMNSAran908	Titanoeca psammophila SMNKARA08304	4.13
Titanoeca quadriguttata ZFMKTIS18509	Titanoeca psammophila SMNKARA08304	4.13
Titanoeca quadriguttata ZFMKTIS4982	Titanoeca psammophila SMNKARA08304	4.13
Titanoeca quadriguttata ZFMKTIS4995	Titanoeca psammophila SMNKARA08304	4.13
Titanoeca quadriguttata ZSMARACH00539	Titanoeca psammophila SMNKARA08304	4.13
Titanoeca quadriguttata ZSMARACH00540	Titanoeca psammophila SMNKARA08304	4.13
Xysticus kochi SMNKARA08913	Xysticus audax SMNSAran831	4.13
Xysticus kochi ZFMKTIS19106	Xysticus audax SMNSAran831	4.13
Zelotes longipes ZSMARACH00545	Zelotes petrensis SMNSAran827	4.13
Gonatium rubellum ZFMKTIS22195	Gonatium rubens ZSMARACH00225	4.28
Gonatium rubellum ZFMKTIS2523237	Gonatium rubens ZSMARACH00225	4.28
Gonatium rubellum ZFMKTIS2797	Gonatium rubens ZSMARACH00225	4.28
Gonatium rubens ZFMKGBOL26213	Gonatium rubellum ZSMARACH00563	4.28
Micrargus herbigradus ZFMKTIS2504902	Micrargus georgescuae ZFMKTIS2504925	4.28
Oxyopes heterophthalmus SMNSAran918	Oxyopes ramosus SMNSAran969	4.28
Oxyopes ramosus SMNSAran969	Oxyopes heterophthalmus SMNSAran918	4.28
Oxyopes ramosus ZFMKTIS2648	Oxyopes heterophthalmus SMNSAran918	4.28
Ozyptila simplex SMNKARA09066	Ozyptila trux ZFMKTIS2523245	4.28
Pardosa bifasciata SMNKARA09085	Pardosa monticola ZSMARACH00835	4.28
Pardosa bifasciata SMNKARA09087	Pardosa monticola ZSMARACH00835	4.28
Pardosa bifasciata SMNSAran897	Pardosa monticola ZSMARACH00835	4.28
Pardosa wagleri ZFMKTIS4962	Pardosa monticola ZSMARACH00835	4.28
Pardosa wagleri ZSMGBOL08327	Pardosa monticola ZSMARACH00835	4.28
Philodromus collinus ZSMARACH00510	Philodromus aureolus SMNSAran1124	4.28
Piratula knorri ZFMKTIS4943	Piratula latitans SMNSAran949	4.28
Piratula knorri ZSMGBOL08299	Piratula latitans SMNSAran949	4.28
Piratula latitans SMNSAran949	Piratula knorri ZFMKTIS4943	4.28
Piratula latitans ZFMKTIS18396	Piratula knorri ZFMKTIS4943	4.28
Piratula latitans ZFMKTIS2476	Piratula knorri ZFMKTIS4943	4.28
Piratula latitans ZSMARACH00412	Piratula knorri ZFMKTIS4943	4.28
Piratula latitans ZSMARACH00464	Piratula knorri ZFMKTIS4943	4.28
Tapinocyba insecta ZFMKTIS22234	Tapinocyba pallens ZFMKTIS2504906	4.28
Titanoeca quadriguttata SMNSAran880	Titanoeca psammophila SMNKARA08304	4.28
Titanoeca quadriguttata SMNSAran881	Titanoeca psammophila SMNKARA08304	4.28
Xysticus kochi SMNKARA08349	Xysticus cristatus SMNSAran1150	4.28
Xysticus kochi SMNKARA08914	Xysticus audax SMNSAran831	4.28
Xysticus kochi SMNSAran830	Xysticus cristatus SMNSAran1150	4.28
Xysticus kochi ZSMARACH00084	Xysticus audax SMNSAran831	4.28
Xysticus kochi ZSMARACH00354	Xysticus audax SMNSAran831	4.28
Zygiella atrica ZFMKTIS7095	Zygiella x-notata ZSMARACH00781	4.28
Zygiella x-notata ZSMARACH00781	Zygiella atrica ZFMKTIS7095	4.28
Clubiona lutescens ZSMARACH00713	Clubiona stagnatilis ZSMARACH00245	4.44
Clubiona lutescens ZSMGBOL08311	Clubiona stagnatilis ZSMARACH00245	4.44
Clubiona reclusa ZFMKTIS18367	Clubiona subsultans ZFMKTIS19139	4.44
Clubiona stagnatilis ZSMARACH00245	Clubiona lutescens ZSMARACH00713	4.44
Clubiona subsultans ZFMKTIS19139	Clubiona reclusa ZFMKTIS18367	4.44
Clubiona subsultans ZFMKTIS2775	Clubiona reclusa ZFMKTIS18367	4.44
Pardosa hortensis SMNKARA08896	Pardosa monticola ZSMARACH00835	4.44
Pardosa hortensis ZFMKTIS2480	Pardosa monticola ZSMARACH00835	4.44
Philodromus buxi ZFMKTIS2467	Philodromus aureolus SMNSAran1124	4.44
Philodromus cespitum ZSMGBOL08340	Philodromus aureolus SMNSAran1124	4.44
Tapinocyba insecta ZFMKTIS7190	Tapinocyba pallens ZFMKTIS2504906	4.44
Tapinocyba insecta ZSMARACH00119	Tapinocyba pallens ZFMKTIS2504906	4.44
Xysticus kochi SMNSAran829	Xysticus audax SMNSAran831	4.44
Xysticus kochi SMNSAran920	Xysticus audax SMNSAran831	4.44
Clubiona frutetorum ZSMARACH00758	Clubiona lutescens ZFMKTIS2776	4.59
Clubiona lutescens ZFMKTIS18373	Clubiona stagnatilis ZSMARACH00245	4.59
Clubiona lutescens ZFMKTIS2314	Clubiona stagnatilis ZSMARACH00245	4.59
Clubiona lutescens ZFMKTIS2366	Clubiona stagnatilis ZSMARACH00245	4.59
Clubiona lutescens ZFMKTIS2776	Clubiona frutetorum ZSMARACH00758	4.59
Clubiona lutescens ZFMKTIS7196	Clubiona stagnatilis ZSMARACH00245	4.59
Clubiona reclusa ZFMKTIS2417	Clubiona subsultans ZFMKTIS19139	4.59
Clubiona reclusa ZFMKTIS2486	Clubiona subsultans ZFMKTIS19139	4.59
Clubiona reclusa ZSMARACH00419	Clubiona subsultans ZFMKTIS19139	4.59
Clubiona reclusa ZSMARACH00420	Clubiona subsultans ZFMKTIS19139	4.59
Coelotes atropos ZSMARACH00090	Coelotes terrestris ZFMKTIS2517052	4.59
Coelotes terrestris ZFMKTIS2517052	Coelotes atropos ZSMARACH00090	4.59
Oxyopes ramosus SMNSAran1059	Oxyopes heterophthalmus SMNSAran918	4.59
Pardosa giebeli ZFMKTIS15925	Pardosa nigra ZFMKTIS2650	4.59
Pardosa hortensis SMNKARA08172	Pardosa monticola ZSMARACH00835	4.59
Pardosa hortensis SMNKARA08174	Pardosa monticola ZSMARACH00835	4.59
Pardosa hortensis SMNKARA08337	Pardosa monticola ZSMARACH00835	4.59
Pardosa hortensis SMNKARA08981	Pardosa monticola ZSMARACH00835	4.59
Pardosa hortensis SMNSAran828	Pardosa monticola ZSMARACH00835	4.59
Pardosa hortensis SMNSAran921	Pardosa monticola ZSMARACH00835	4.59
Pardosa hortensis SMNSAranJHS388	Pardosa monticola ZSMARACH00835	4.59
Pardosa hortensis ZFMKTIS22188	Pardosa monticola ZSMARACH00835	4.59
Pardosa hortensis ZFMKTIS2523257	Pardosa monticola ZSMARACH00835	4.59
Pardosa hortensis ZFMKTIS2821	Pardosa monticola ZSMARACH00835	4.59
Pardosa hortensis ZSMARACH00670	Pardosa monticola ZSMARACH00835	4.59
Pardosa hortensis ZSMARACH00671	Pardosa monticola ZSMARACH00835	4.59
Pardosa nigra ZFMKTIS2650	Pardosa giebeli ZFMKTIS15925	4.59
Philodromus cespitum SMNKARA08246	Philodromus aureolus SMNSAran1124	4.59
Trochosa ruricola ZFMKTIS2391	Trochosa terricola SMNKARA08395	4.59
Trochosa ruricola ZSMARACH00491	Trochosa terricola SMNKARA08395	4.59
Bathyphantes gracilis ZFMKTIS2517036	Bathyphantes similis ZFMKTIS2517037	4.74
Bathyphantes similis ZFMKTIS2517037	Bathyphantes gracilis ZFMKTIS2517036	4.74
Coelotes terrestris SMNKARA08386	Coelotes atropos ZSMARACH00090	4.74
Coelotes terrestris SMNKARA08928	Coelotes atropos ZSMARACH00090	4.74
Coelotes terrestris SMNKARA08929	Coelotes atropos ZSMARACH00090	4.74
Coelotes terrestris SMNKARA08930	Coelotes atropos ZSMARACH00090	4.74
Coelotes terrestris SMNSAran853	Coelotes atropos ZSMARACH00090	4.74
Coelotes terrestris SMNSAran927	Coelotes atropos ZSMARACH00090	4.74
Coelotes terrestris ZFMKTIS19333	Coelotes atropos ZSMARACH00090	4.74
Coelotes terrestris ZFMKTIS20900	Coelotes atropos ZSMARACH00090	4.74
Coelotes terrestris ZFMKTIS20939	Coelotes atropos ZSMARACH00090	4.74
Coelotes terrestris ZFMKTIS20940	Coelotes atropos ZSMARACH00090	4.74
Coelotes terrestris ZFMKTIS22200	Coelotes atropos ZSMARACH00090	4.74
Coelotes terrestris ZFMKTIS2504884	Coelotes atropos ZSMARACH00090	4.74
Coelotes terrestris ZFMKTIS2516886	Coelotes atropos ZSMARACH00090	4.74
Coelotes terrestris ZFMKTIS2517053	Coelotes atropos ZSMARACH00090	4.74
Coelotes terrestris ZFMKTIS2517072	Coelotes atropos ZSMARACH00090	4.74
Coelotes terrestris ZFMKTIS2517371	Coelotes atropos ZSMARACH00090	4.74
Coelotes terrestris ZFMKTIS2523261	Coelotes atropos ZSMARACH00090	4.74
Coelotes terrestris ZFMKTIS2523262	Coelotes atropos ZSMARACH00090	4.74
Coelotes terrestris ZFMKTIS2704	Coelotes atropos ZSMARACH00090	4.74
Coelotes terrestris ZFMKTIS2744	Coelotes atropos ZSMARACH00090	4.74
Coelotes terrestris ZSMARACH00091	Coelotes atropos ZSMARACH00090	4.74
Coelotes terrestris ZSMARACH00683	Coelotes atropos ZSMARACH00090	4.74
Coelotes terrestris ZSMARACH00684	Coelotes atropos ZSMARACH00090	4.74
Heliophanus cupreus SMNKARA08870	Heliophanus dampfi SMNSAran1011	4.74
Heliophanus cupreus SMNSAran910	Heliophanus dampfi SMNSAran1011	4.74
Heliophanus cupreus SMNSAran912	Heliophanus dampfi SMNSAran1011	4.74
Heliophanus cupreus ZFMKTIS18471	Heliophanus dampfi SMNSAran1011	4.74
Heliophanus cupreus ZFMKTIS2282	Heliophanus dampfi SMNSAran1011	4.74
Heliophanus cupreus ZFMKTIS2521	Heliophanus dampfi SMNSAran1011	4.74
Heliophanus cupreus ZFMKTIS4966	Heliophanus dampfi SMNSAran1011	4.74
Heliophanus cupreus ZFMKTIS4998	Heliophanus dampfi SMNSAran1011	4.74
Heliophanus cupreus ZSMARACH00385	Heliophanus dampfi SMNSAran1011	4.74
Heliophanus dampfi SMNSAran1011	Heliophanus cupreus SMNKARA08870	4.74
Heliophanus dampfi ZFMKTIS2528587	Heliophanus cupreus SMNKARA08870	4.74
Oxyopes ramosus SMNKARA08213	Oxyopes heterophthalmus SMNSAran918	4.74
Oxyopes ramosus ZFMKTIS19222	Oxyopes heterophthalmus SMNSAran918	4.74
Oxyopes ramosus ZFMKTIS2524859	Oxyopes heterophthalmus SMNSAran918	4.74
Pardosa nigra ZFMKTIS19224	Pardosa giebeli ZFMKTIS15925	4.74
Trochosa ruricola ZSMGBOL08329	Trochosa terricola SMNKARA08220	4.74
Bathyphantes gracilis SMNKARA08354	Bathyphantes similis ZFMKTIS2517037	4.9
Bathyphantes gracilis ZFMKTIS18327	Bathyphantes similis ZFMKTIS2517037	4.9
Bathyphantes gracilis ZFMKTIS22259	Bathyphantes similis ZFMKTIS2517037	4.9
Bathyphantes gracilis ZFMKTIS2496	Bathyphantes similis ZFMKTIS2517037	4.9
Bathyphantes gracilis ZFMKTIS2523187	Bathyphantes similis ZFMKTIS2517037	4.9
Bathyphantes gracilis ZFMKTIS2534474	Bathyphantes similis ZFMKTIS2517037	4.9
Bathyphantes gracilis ZFMKTIS7201	Bathyphantes similis ZFMKTIS2517037	4.9
Clubiona frisia ZFMKTIS7043	Clubiona frutetorum ZSMARACH00758	4.9
Clubiona subsultans ZSMARACH00621	Clubiona reclusa ZFMKTIS18367	4.9
Coelotes terrestris SMNSAran1000	Coelotes atropos ZSMARACH00090	4.9
Coelotes terrestris ZFMKTIS2318	Coelotes atropos ZSMARACH00090	4.9
Coelotes terrestris ZFMKTIS2505025	Coelotes atropos ZSMARACH00090	4.9
Coelotes terrestris ZFMKTIS2517007	Coelotes atropos ZSMARACH00090	4.9
Eresus kollari ZSMARACH00575	Eresus moravicus ZFMKTIS4957	4.9
Eresus moravicus ZFMKTIS4957	Eresus kollari ZSMARACH00575	4.9
Heliophanus cupreus ZFMKTIS2030	Heliophanus dampfi SMNSAran1011	4.9
Heliophanus dampfi SMNKARA09098	Heliophanus cupreus SMNKARA08870	4.9
Ozyptila praticola SMNKARA08247	Ozyptila trux ZFMKTIS2412	4.9
Ozyptila praticola SMNKARA09028	Ozyptila trux ZFMKTIS2412	4.9
Ozyptila praticola SMNSAran940	Ozyptila trux ZFMKTIS2412	4.9
Ozyptila praticola ZFMKTIS2377	Ozyptila trux ZFMKTIS2412	4.9
Ozyptila praticola ZSMARACH00104	Ozyptila trux ZFMKTIS2412	4.9
Ozyptila praticola ZSMARACH00105	Ozyptila trux ZFMKTIS2523245	4.9
Ozyptila praticola ZSMGBOL08305	Ozyptila trux ZFMKTIS2412	4.9
Pardosa hortensis SMNKARA08175	Pardosa monticola ZSMARACH00835	4.9
Trochosa ruricola SMNKARA09078	Trochosa terricola SMNKARA08395	4.9
